# Supplementary material for: A diversity-oriented synthesis of bioactive benzanilides via a regioselective C(sp2)–H hydroxylation strategy
Source: PubMed Central journal article supplement — Chem Sci. 2015 Dec 3;7(3):2229–38. doi: 10.1039/c5sc03905c (PMC5975941; doi:10.1039/c5sc03905c), 2015-12-03

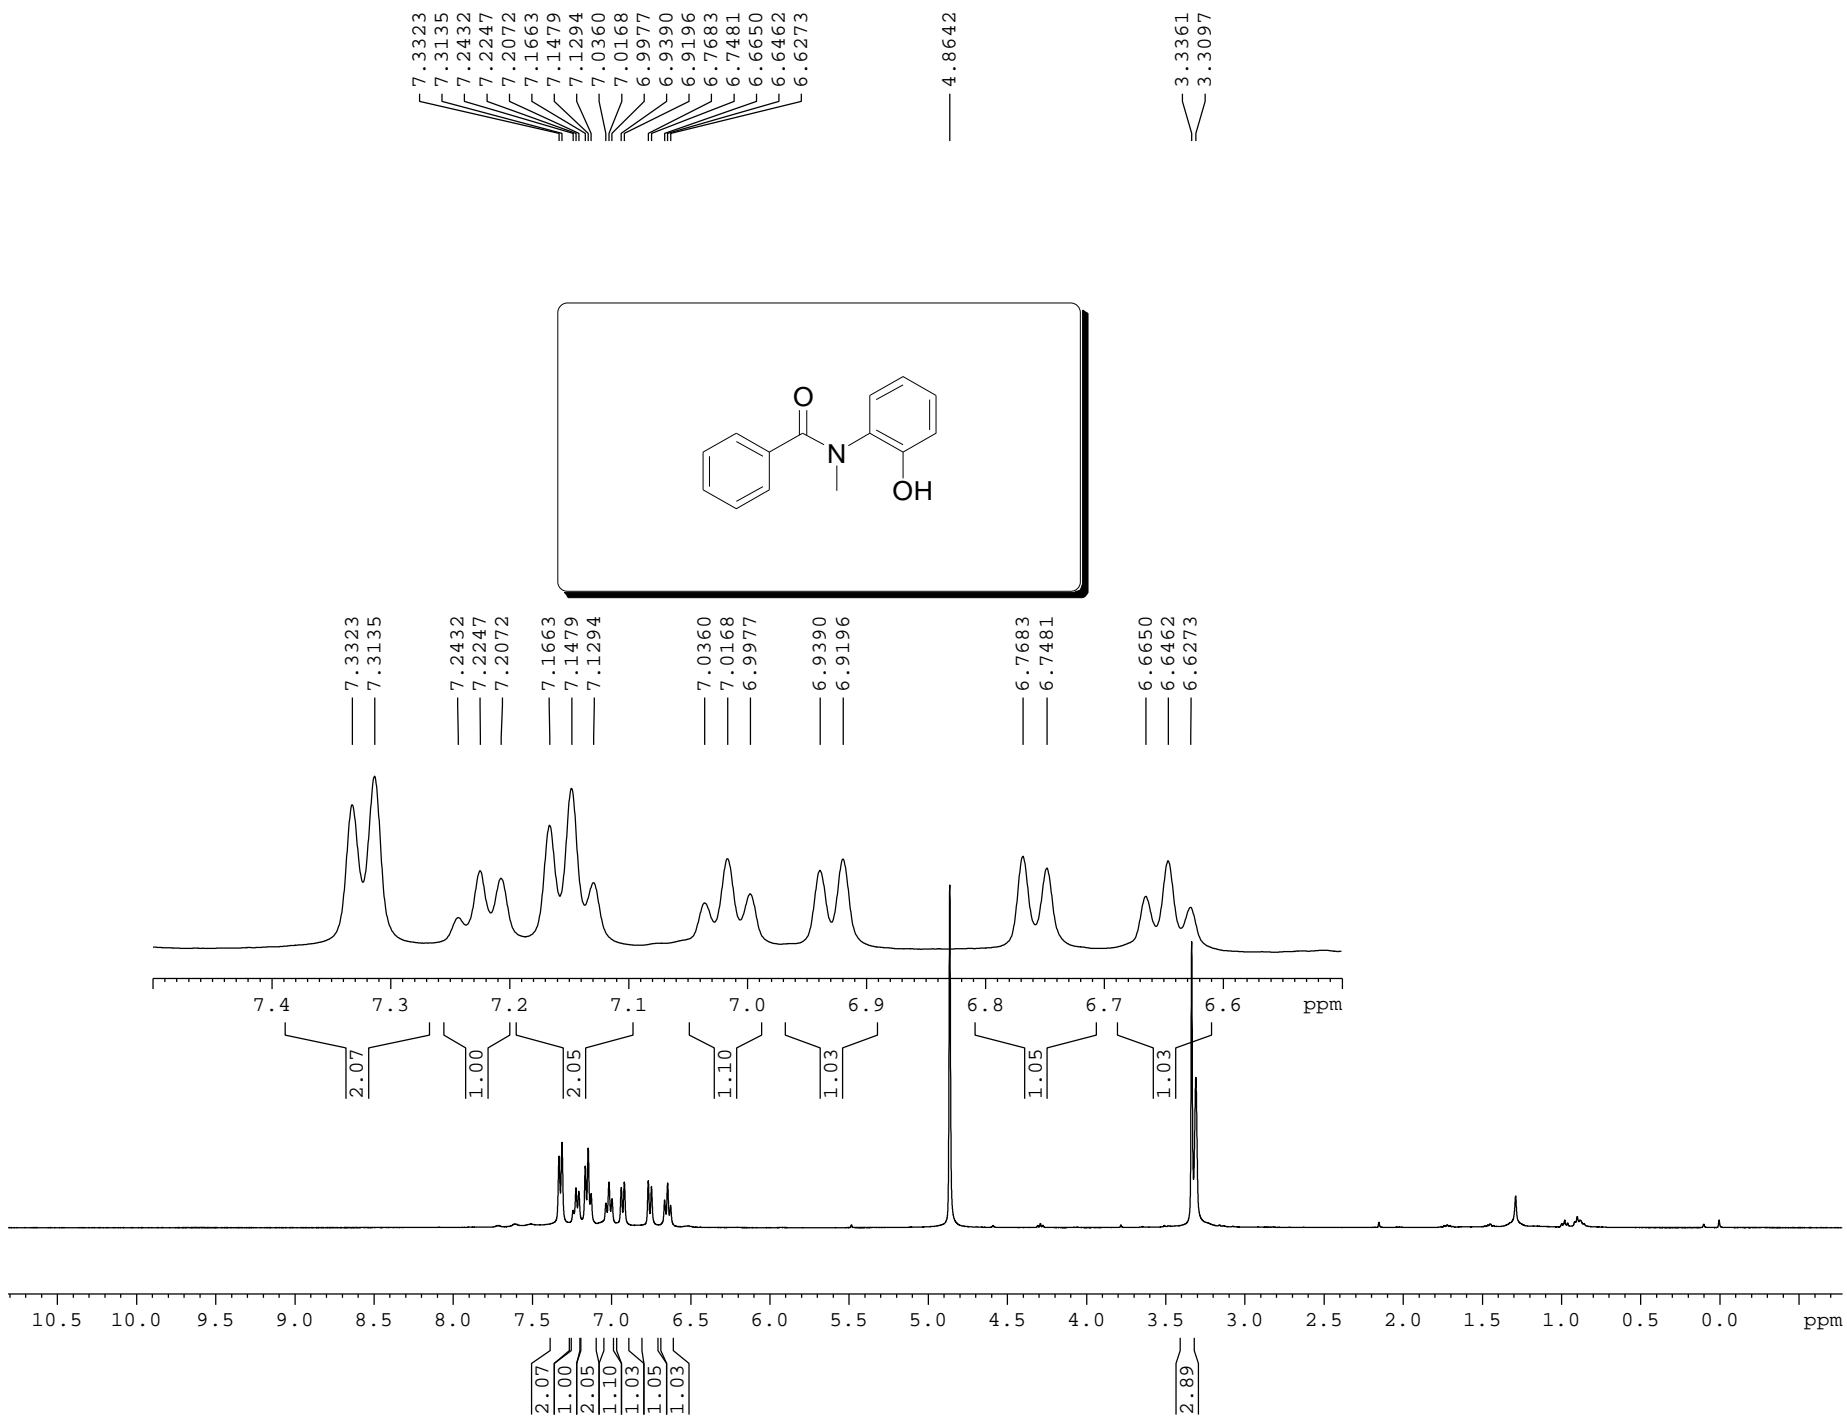

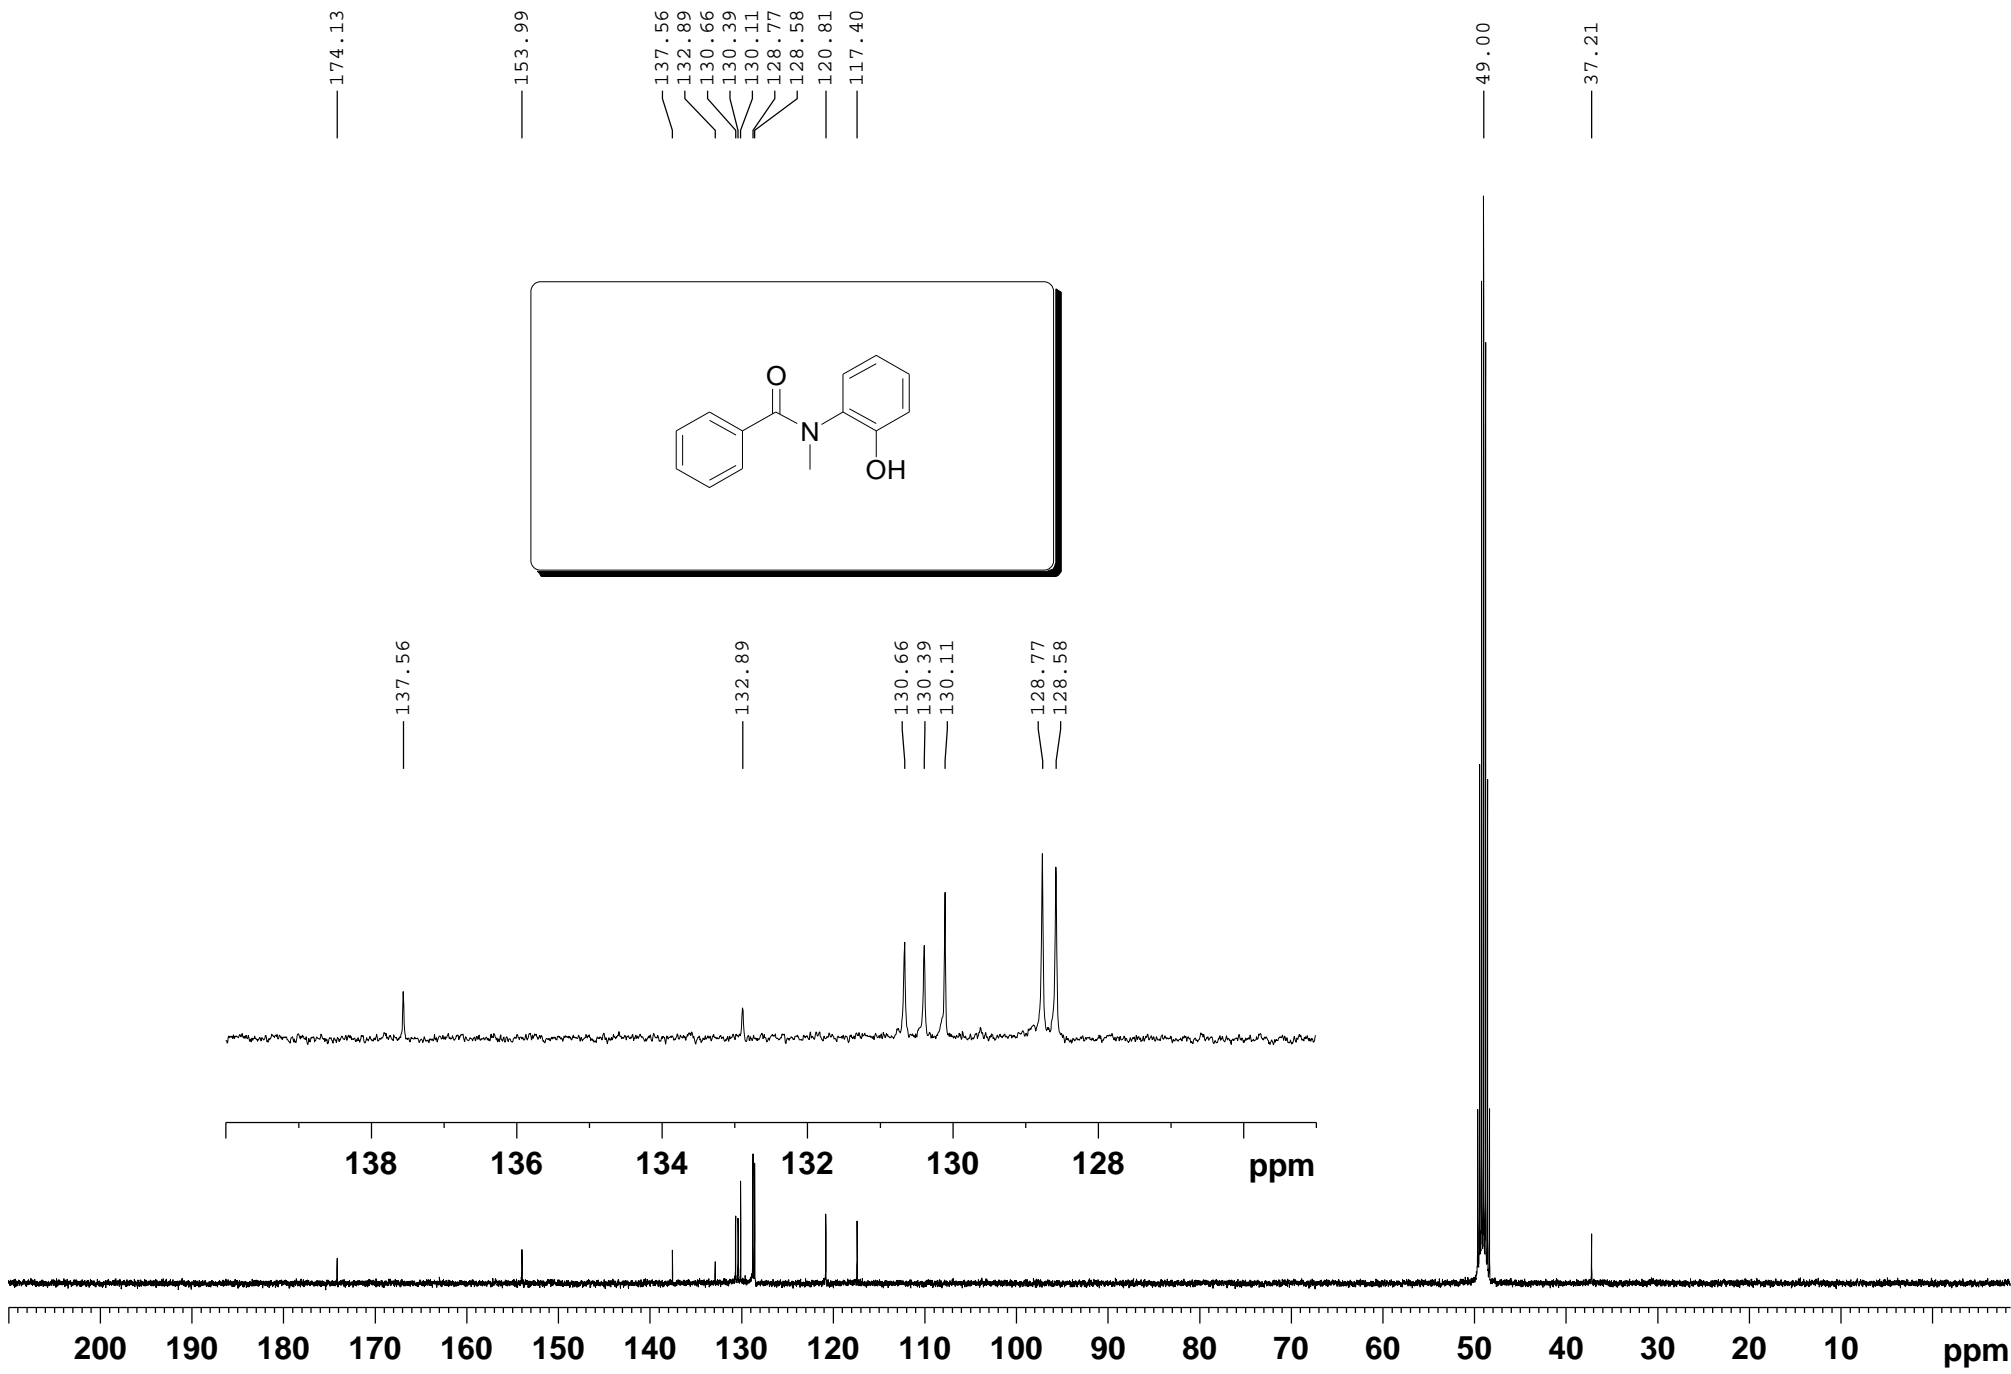

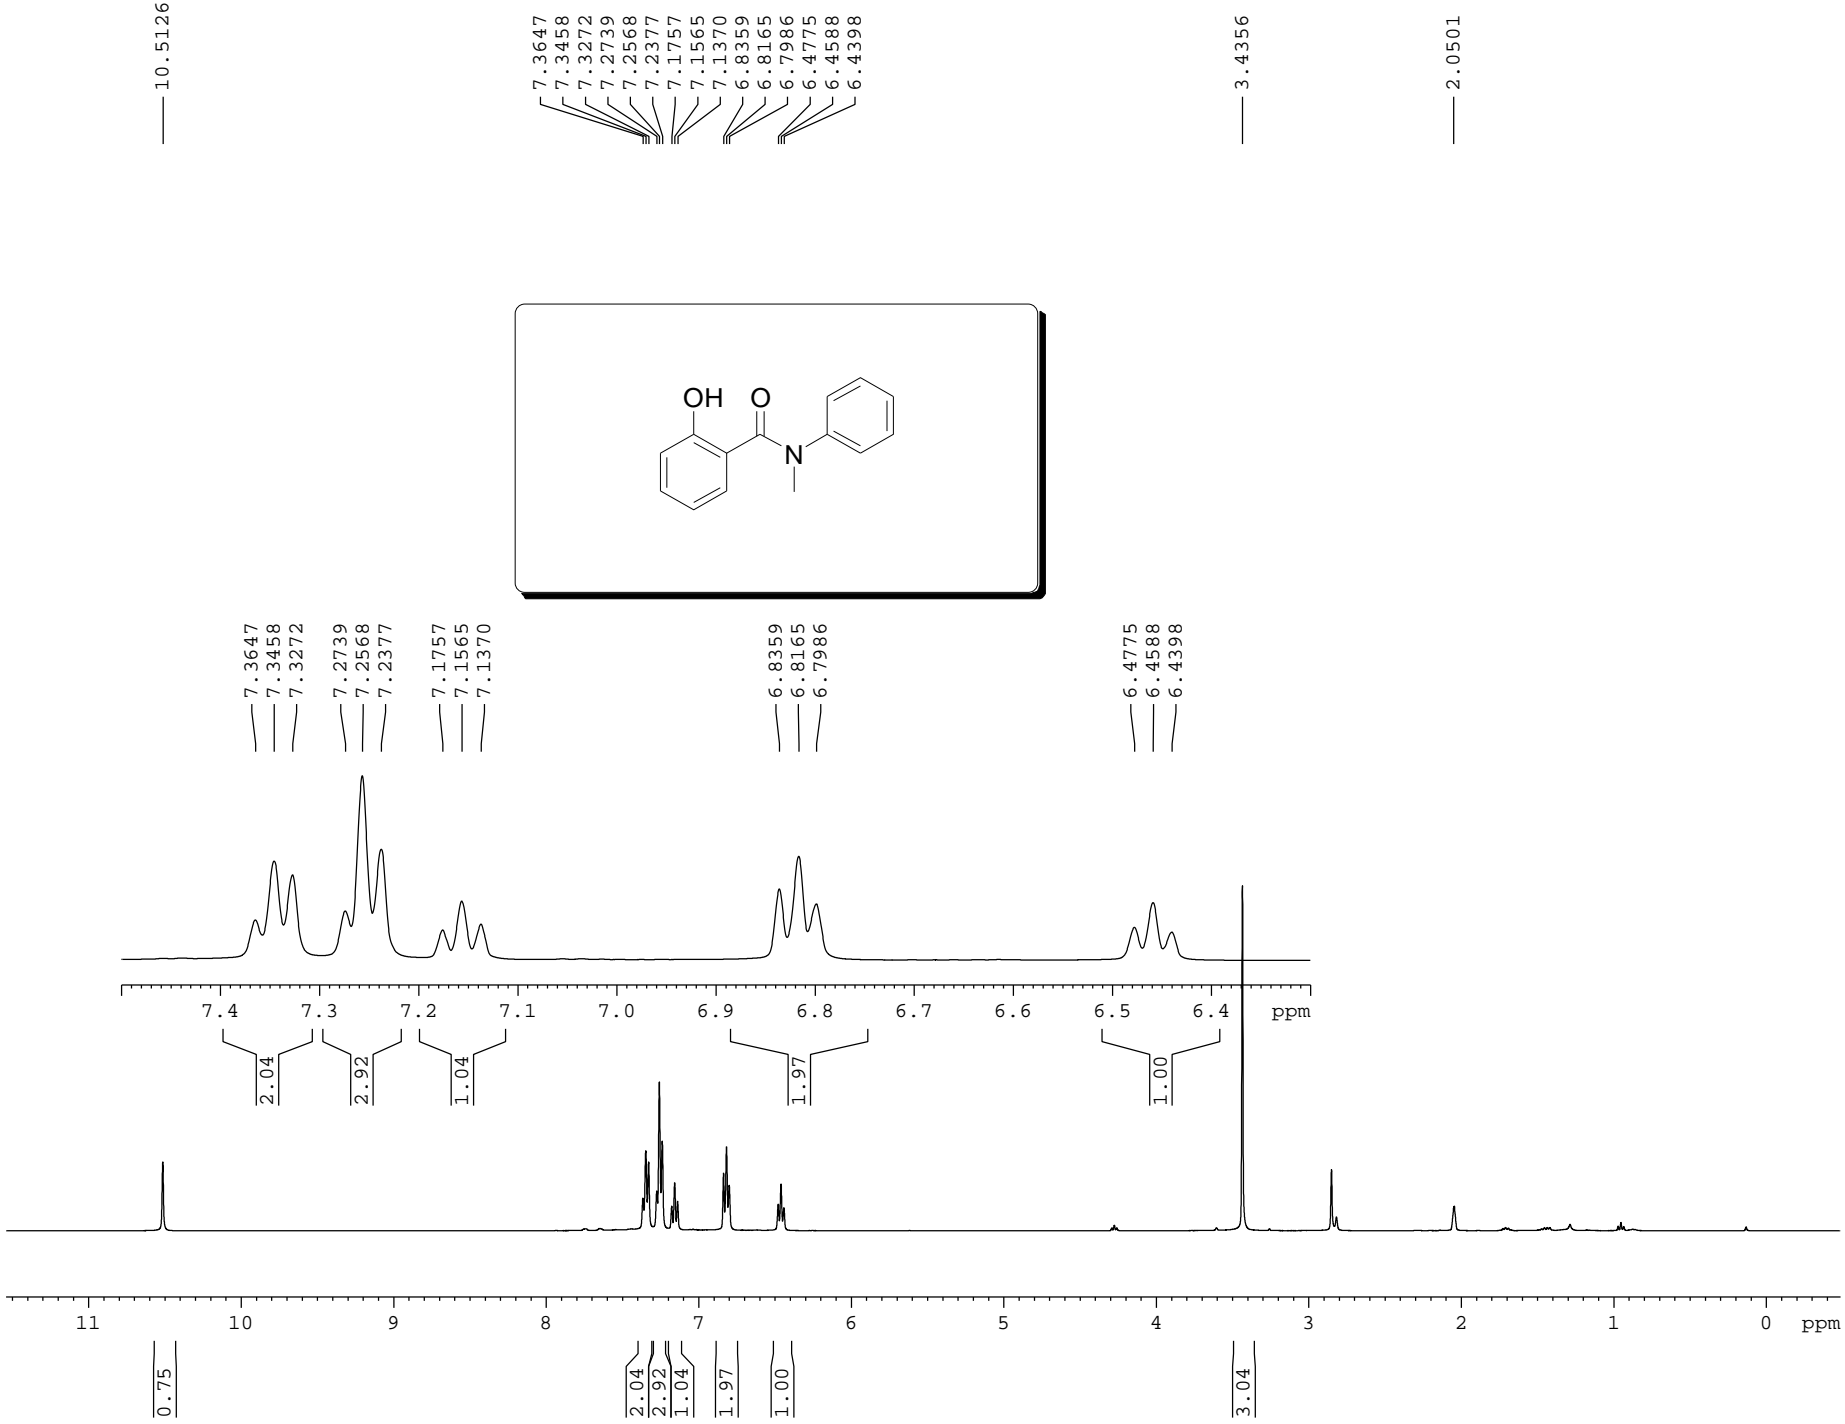

10.5126

3.4356

2.0501

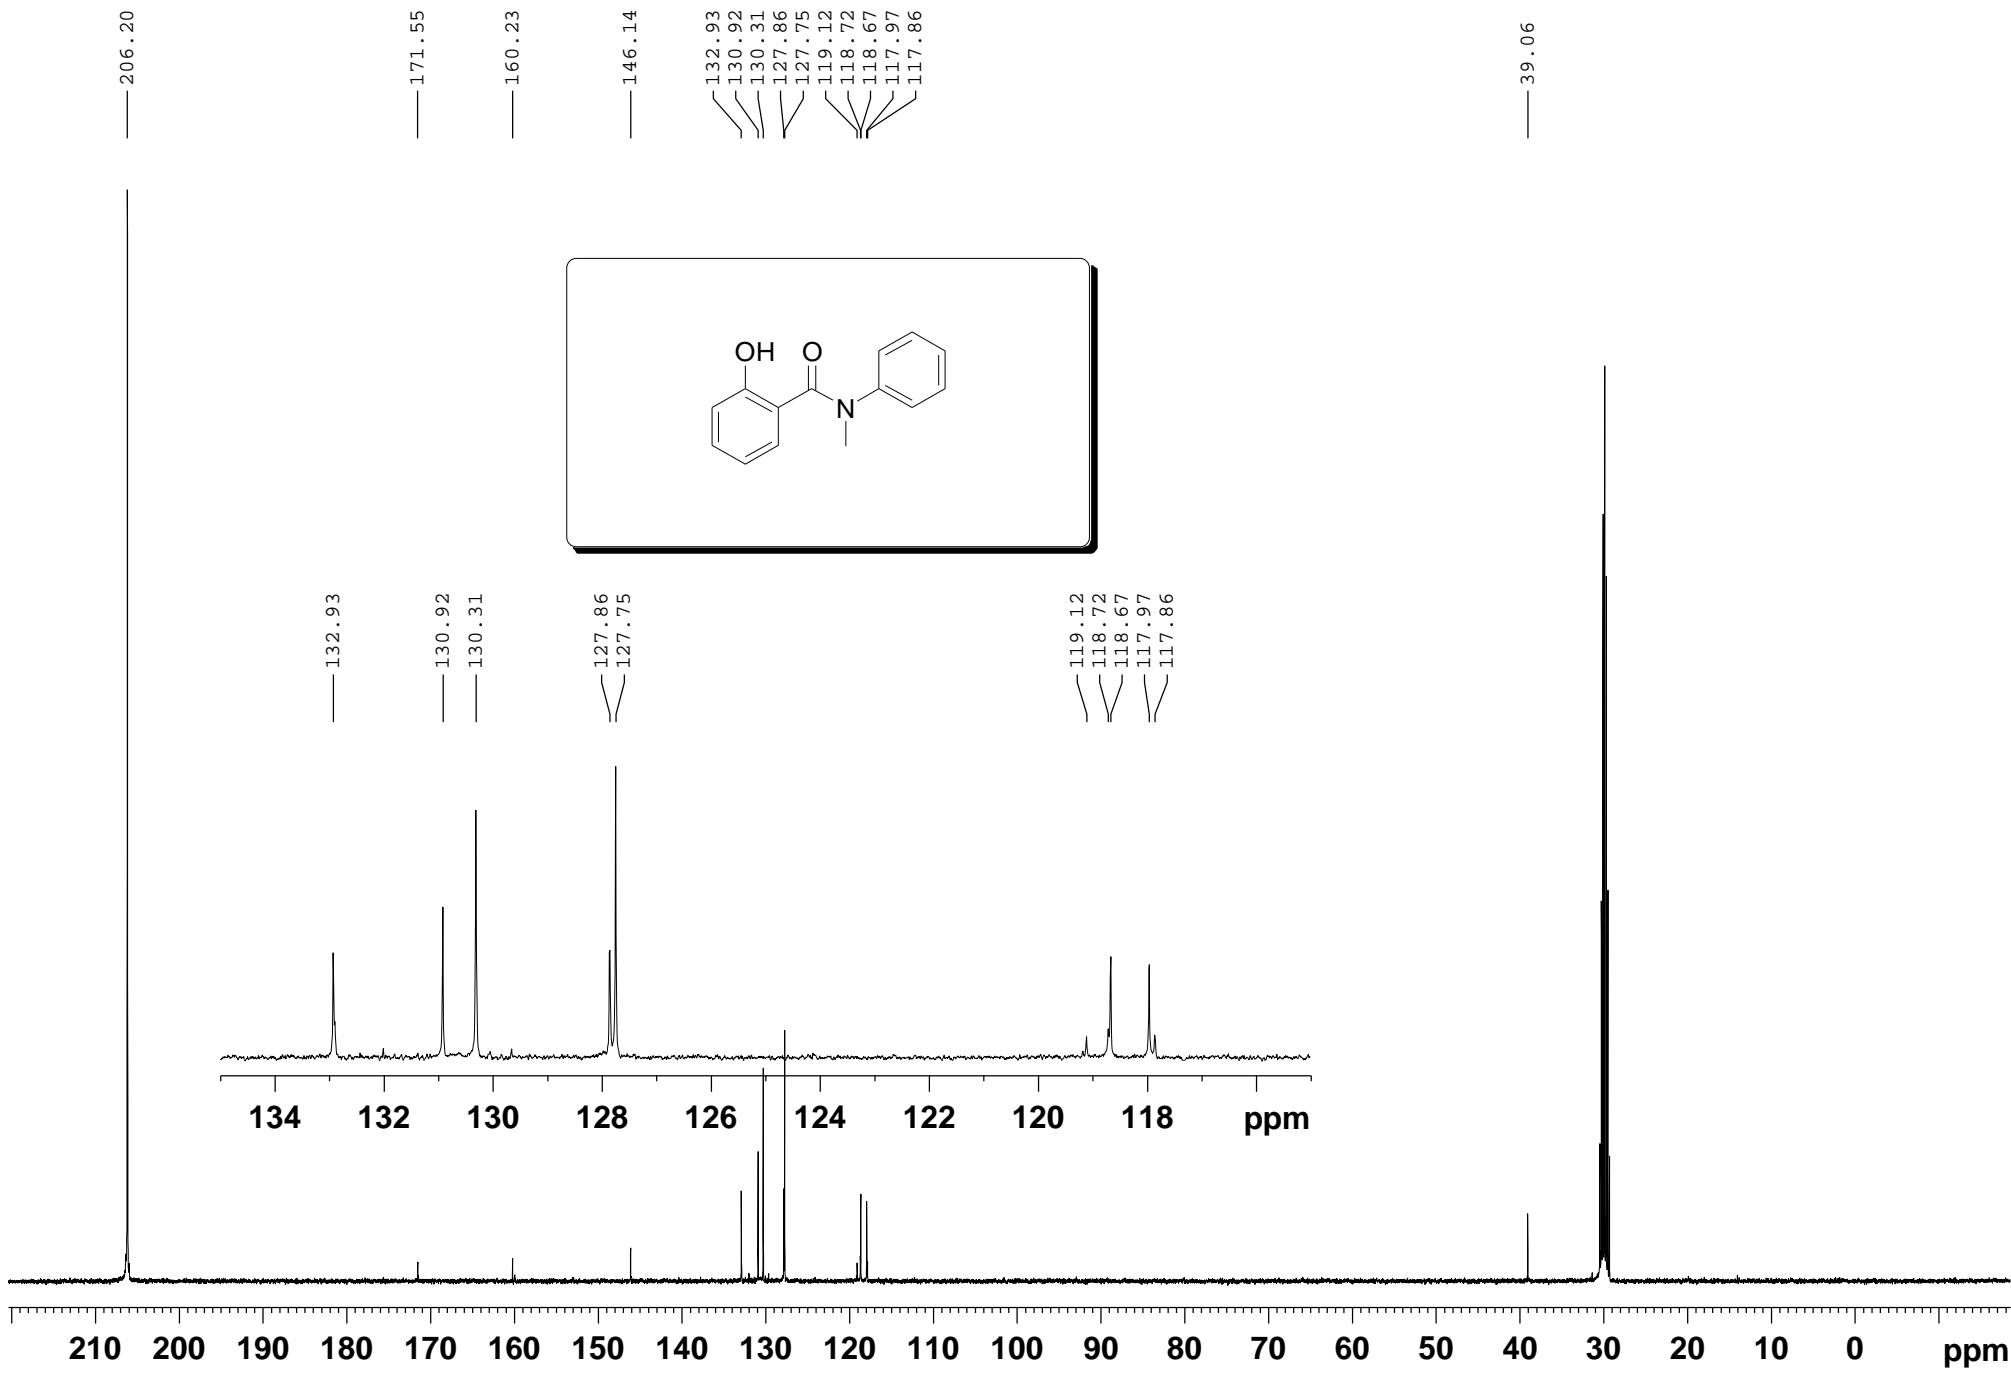

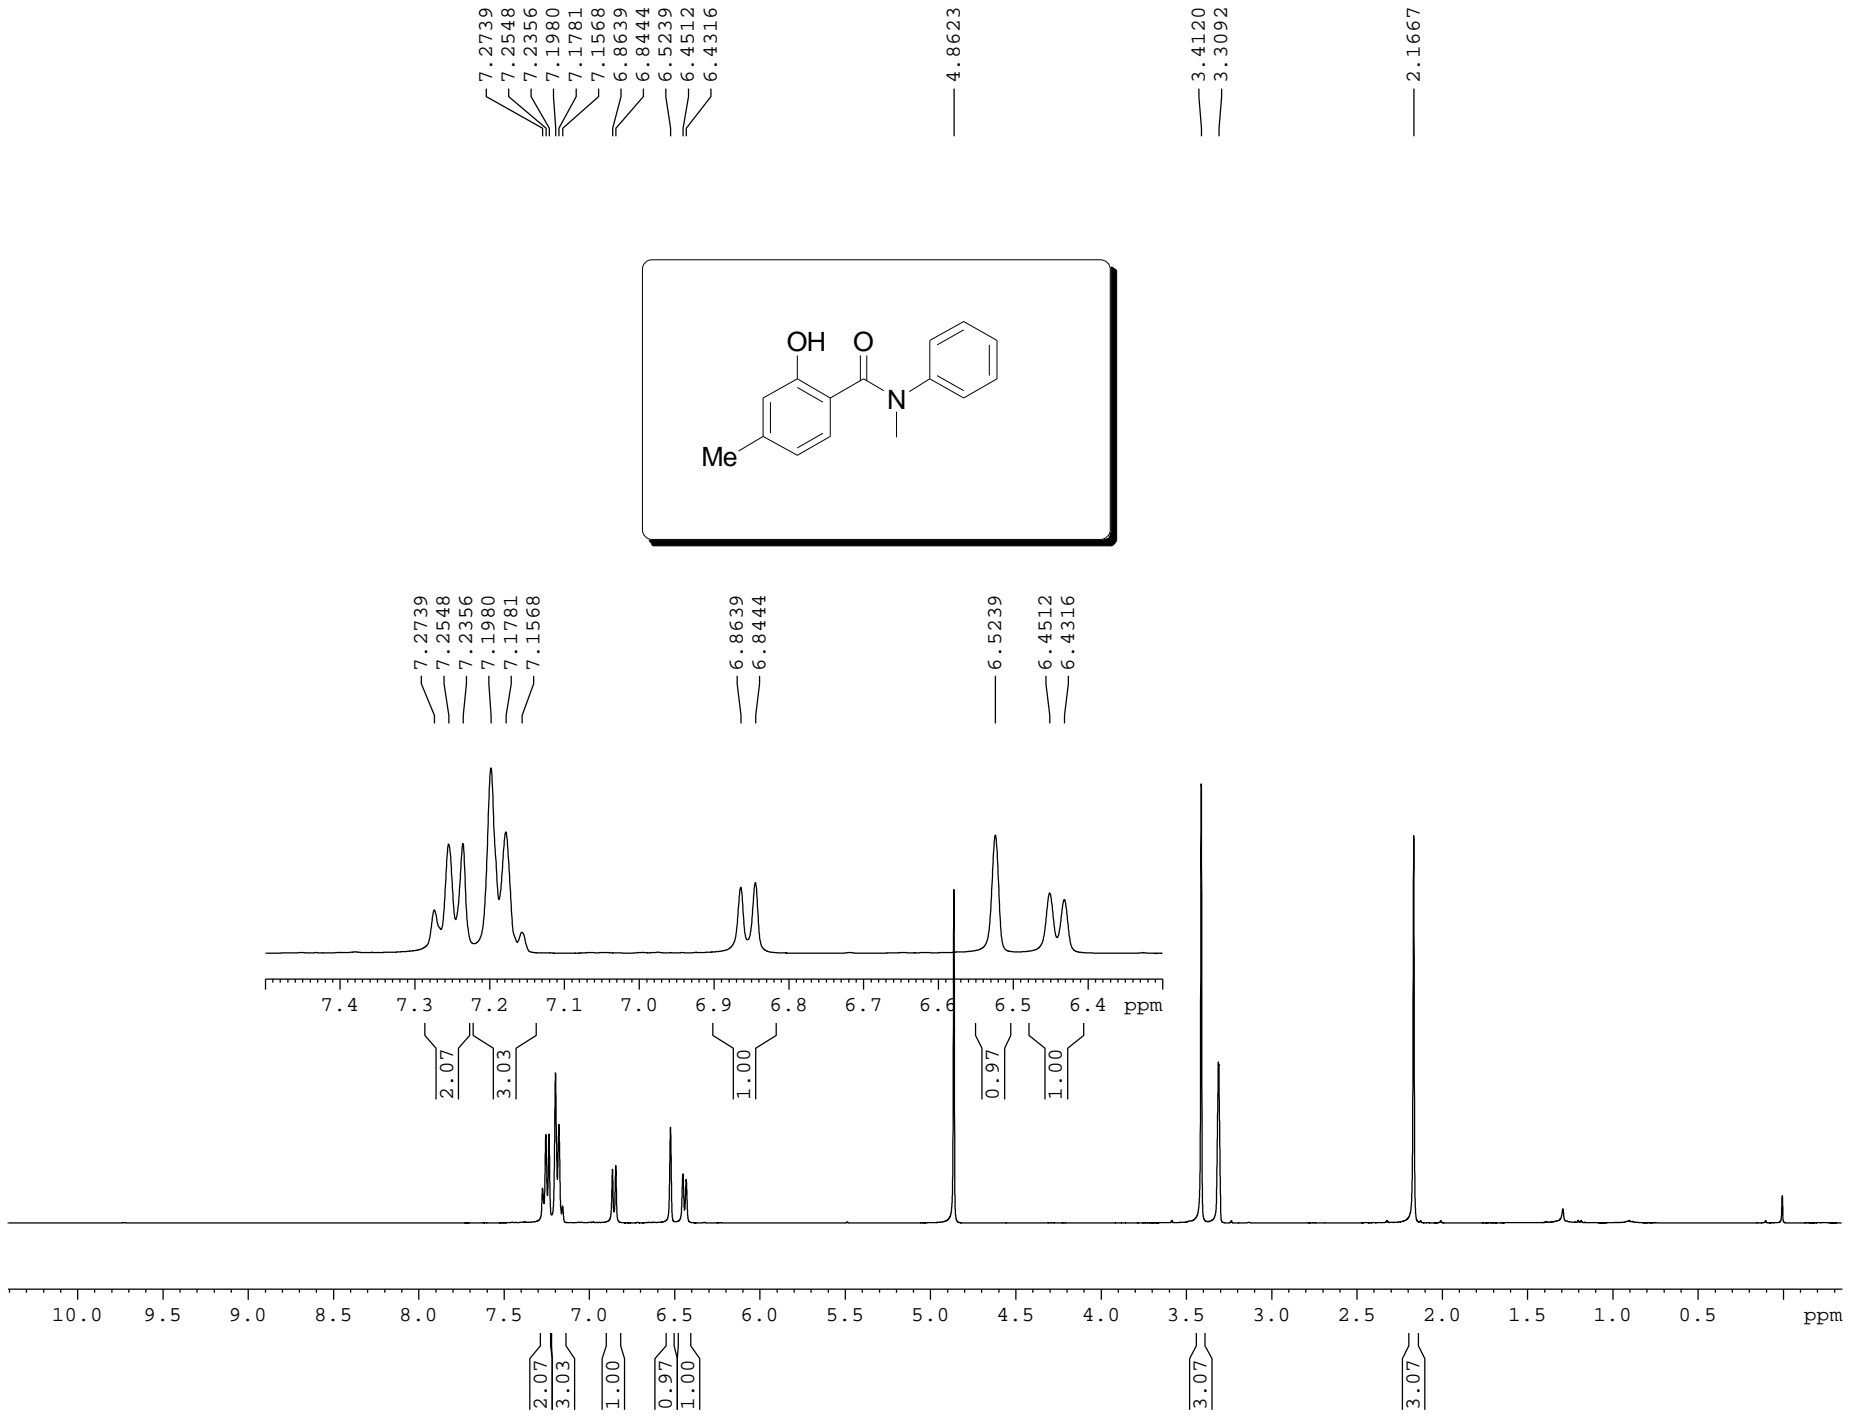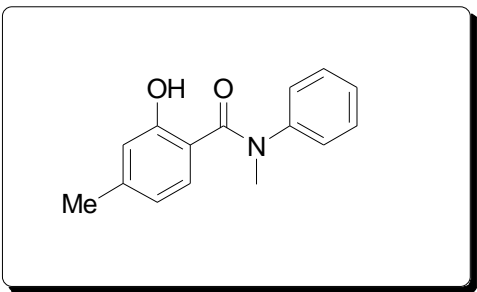

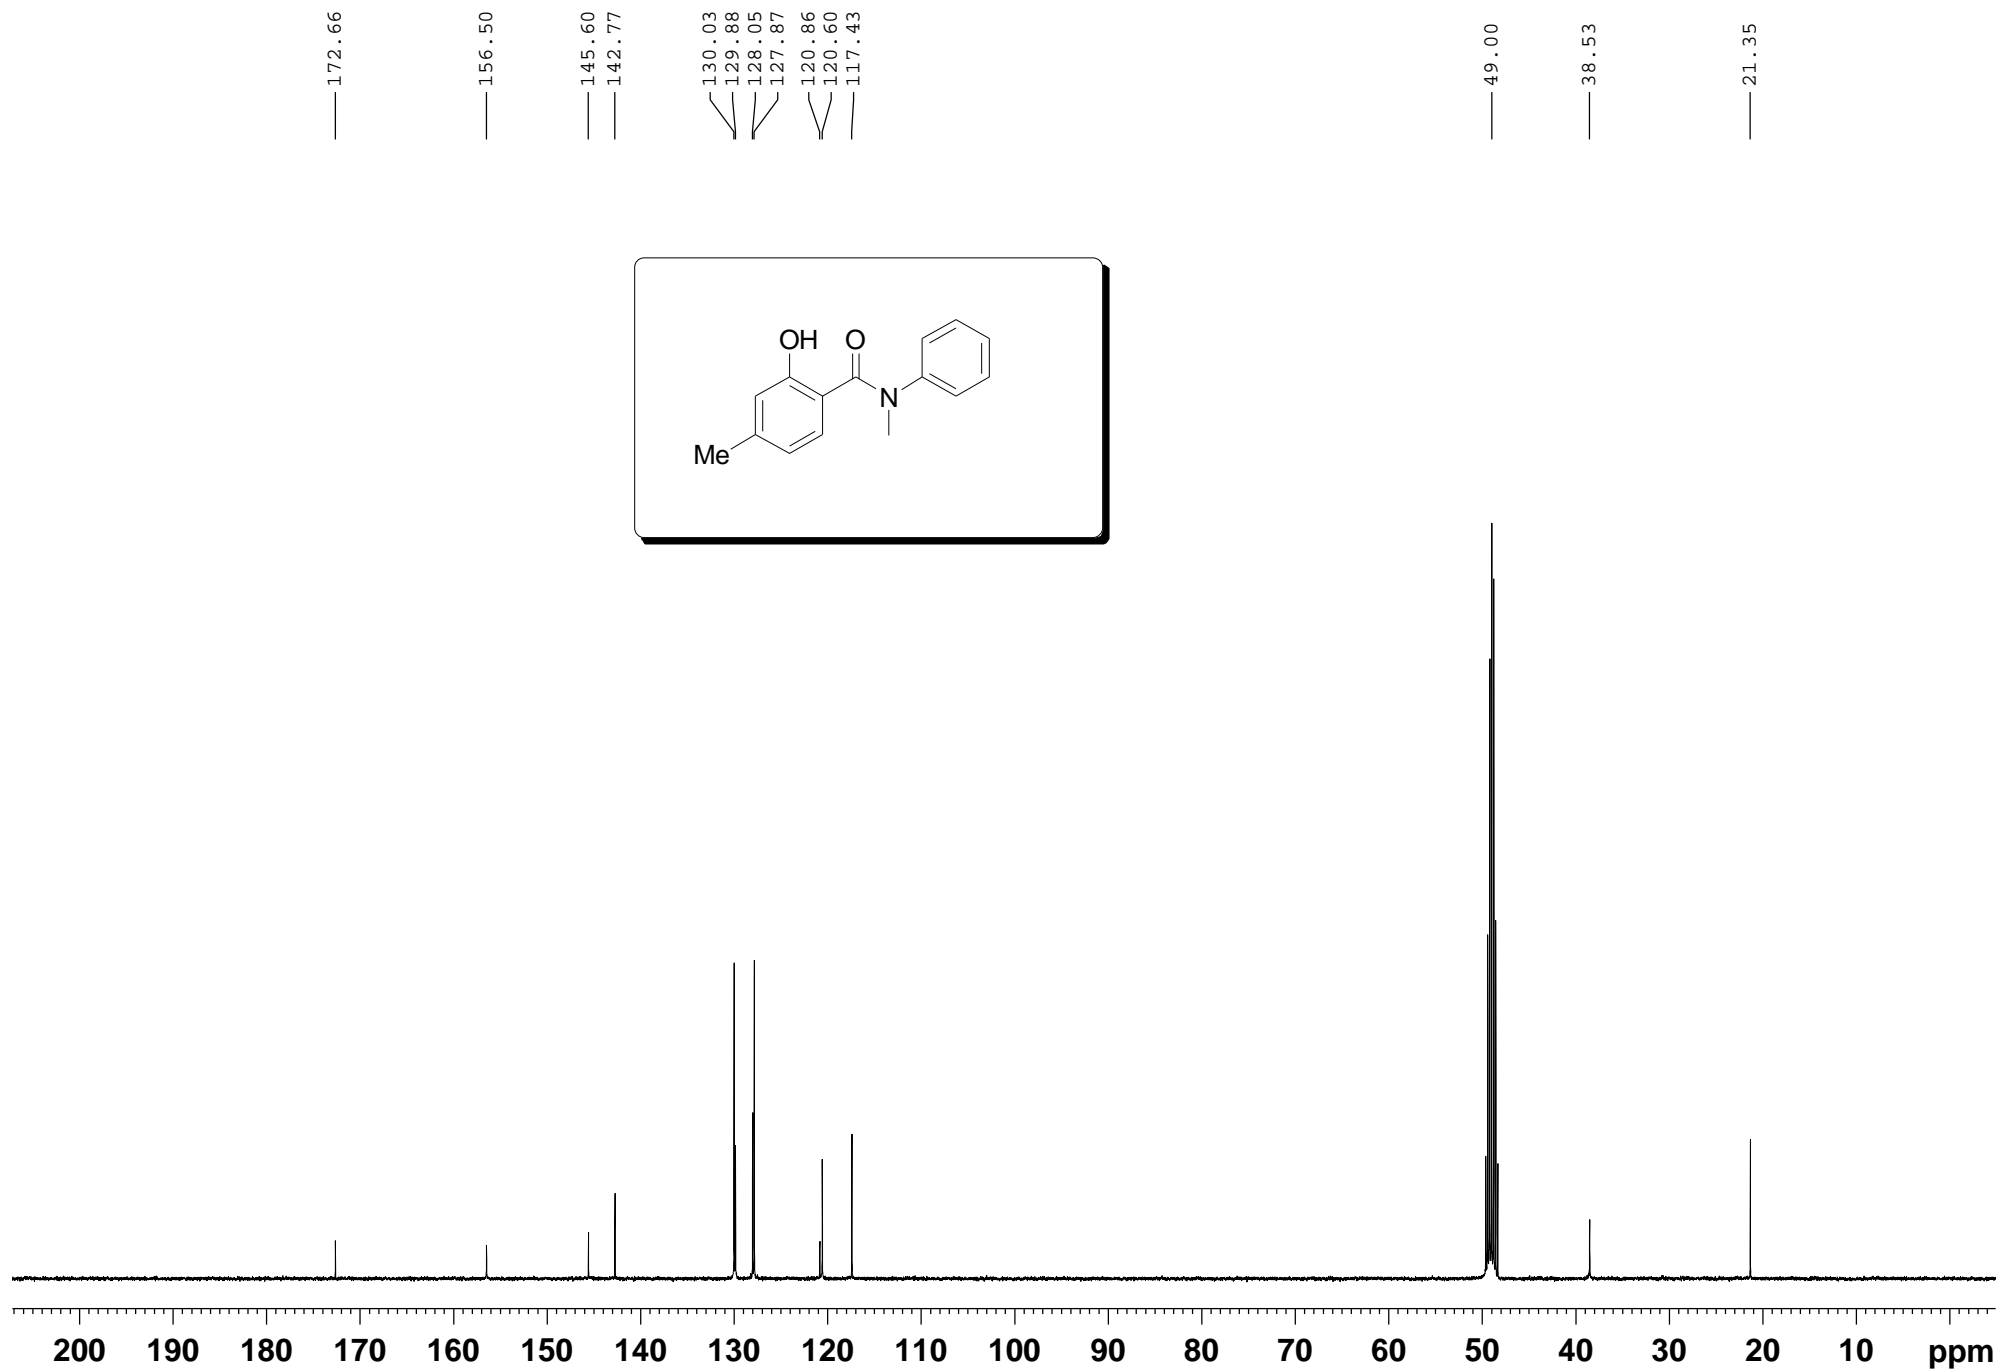

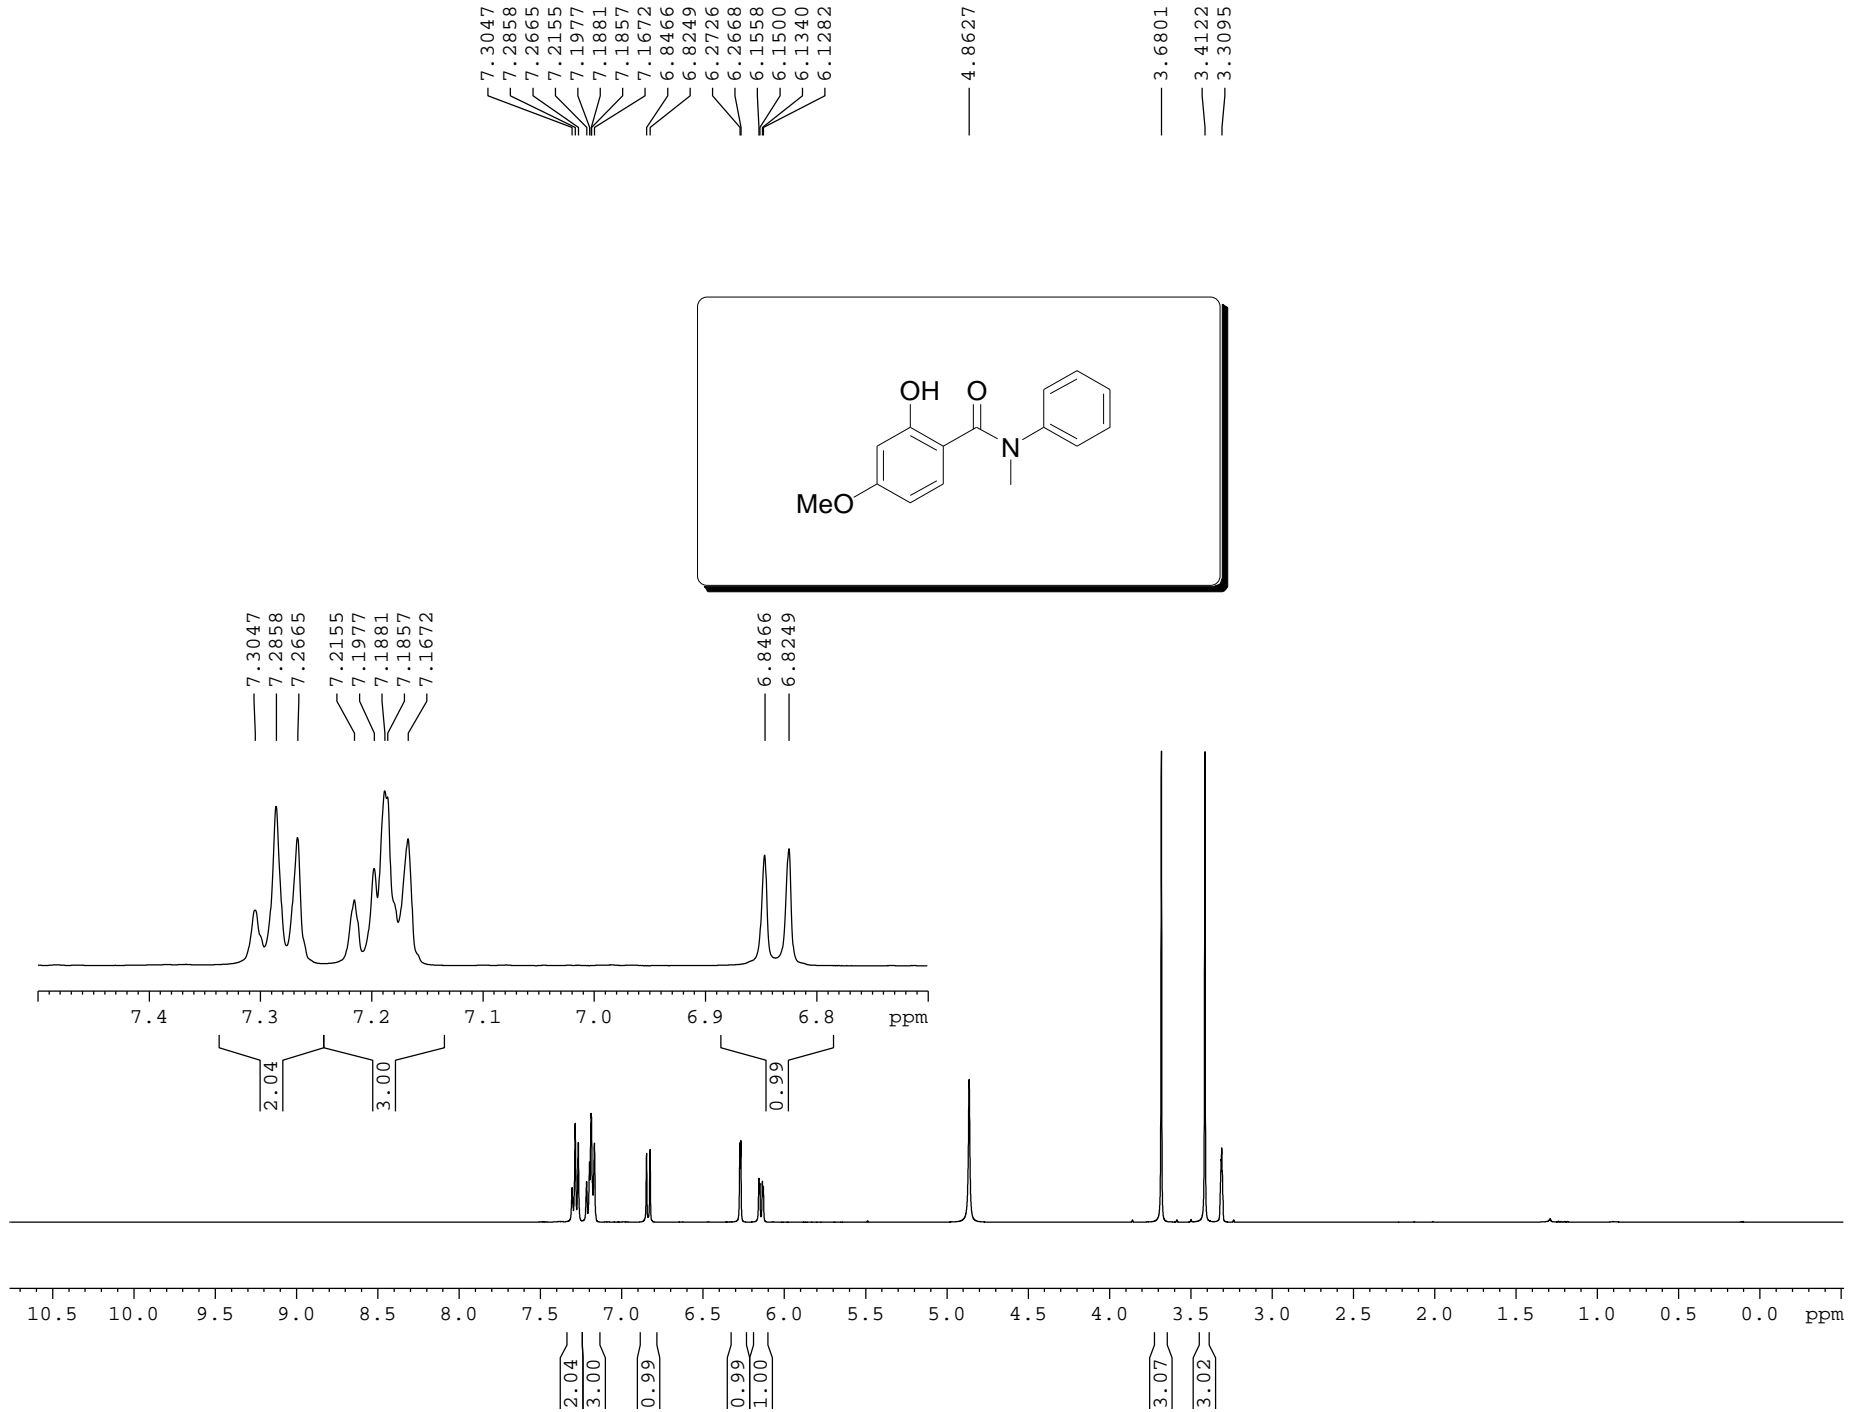

7.3047  
7.2858  
7.2665  
7.2155  
7.1977  
7.1881  
7.1857  
7.1672  
6.8466  
6.8249  
6.2726  
6.2668  
6.1558  
6.1500  
6.1340  
6.1282

4.8627

3.6801  
3.4122  
3.3095

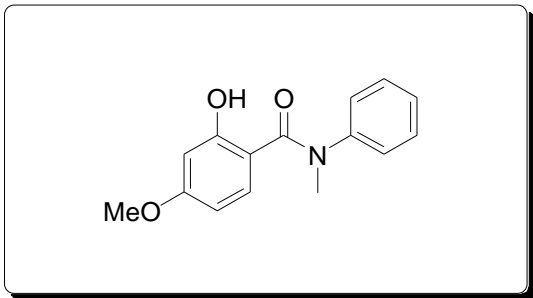

7.3047  
7.2858  
7.2665  
7.2155  
7.1977  
7.1881  
7.1857  
7.1672

6.8466  
6.8249

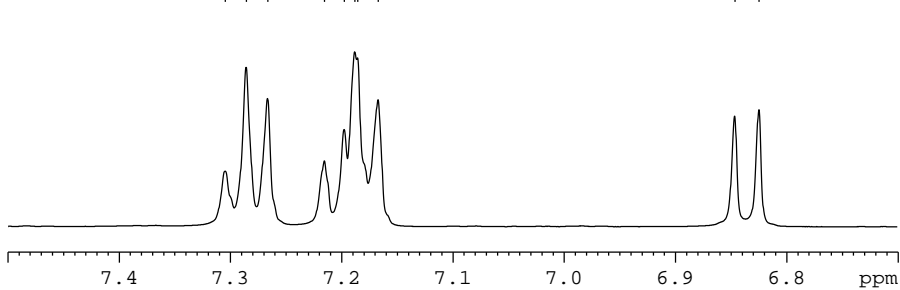

3.07  
3.02

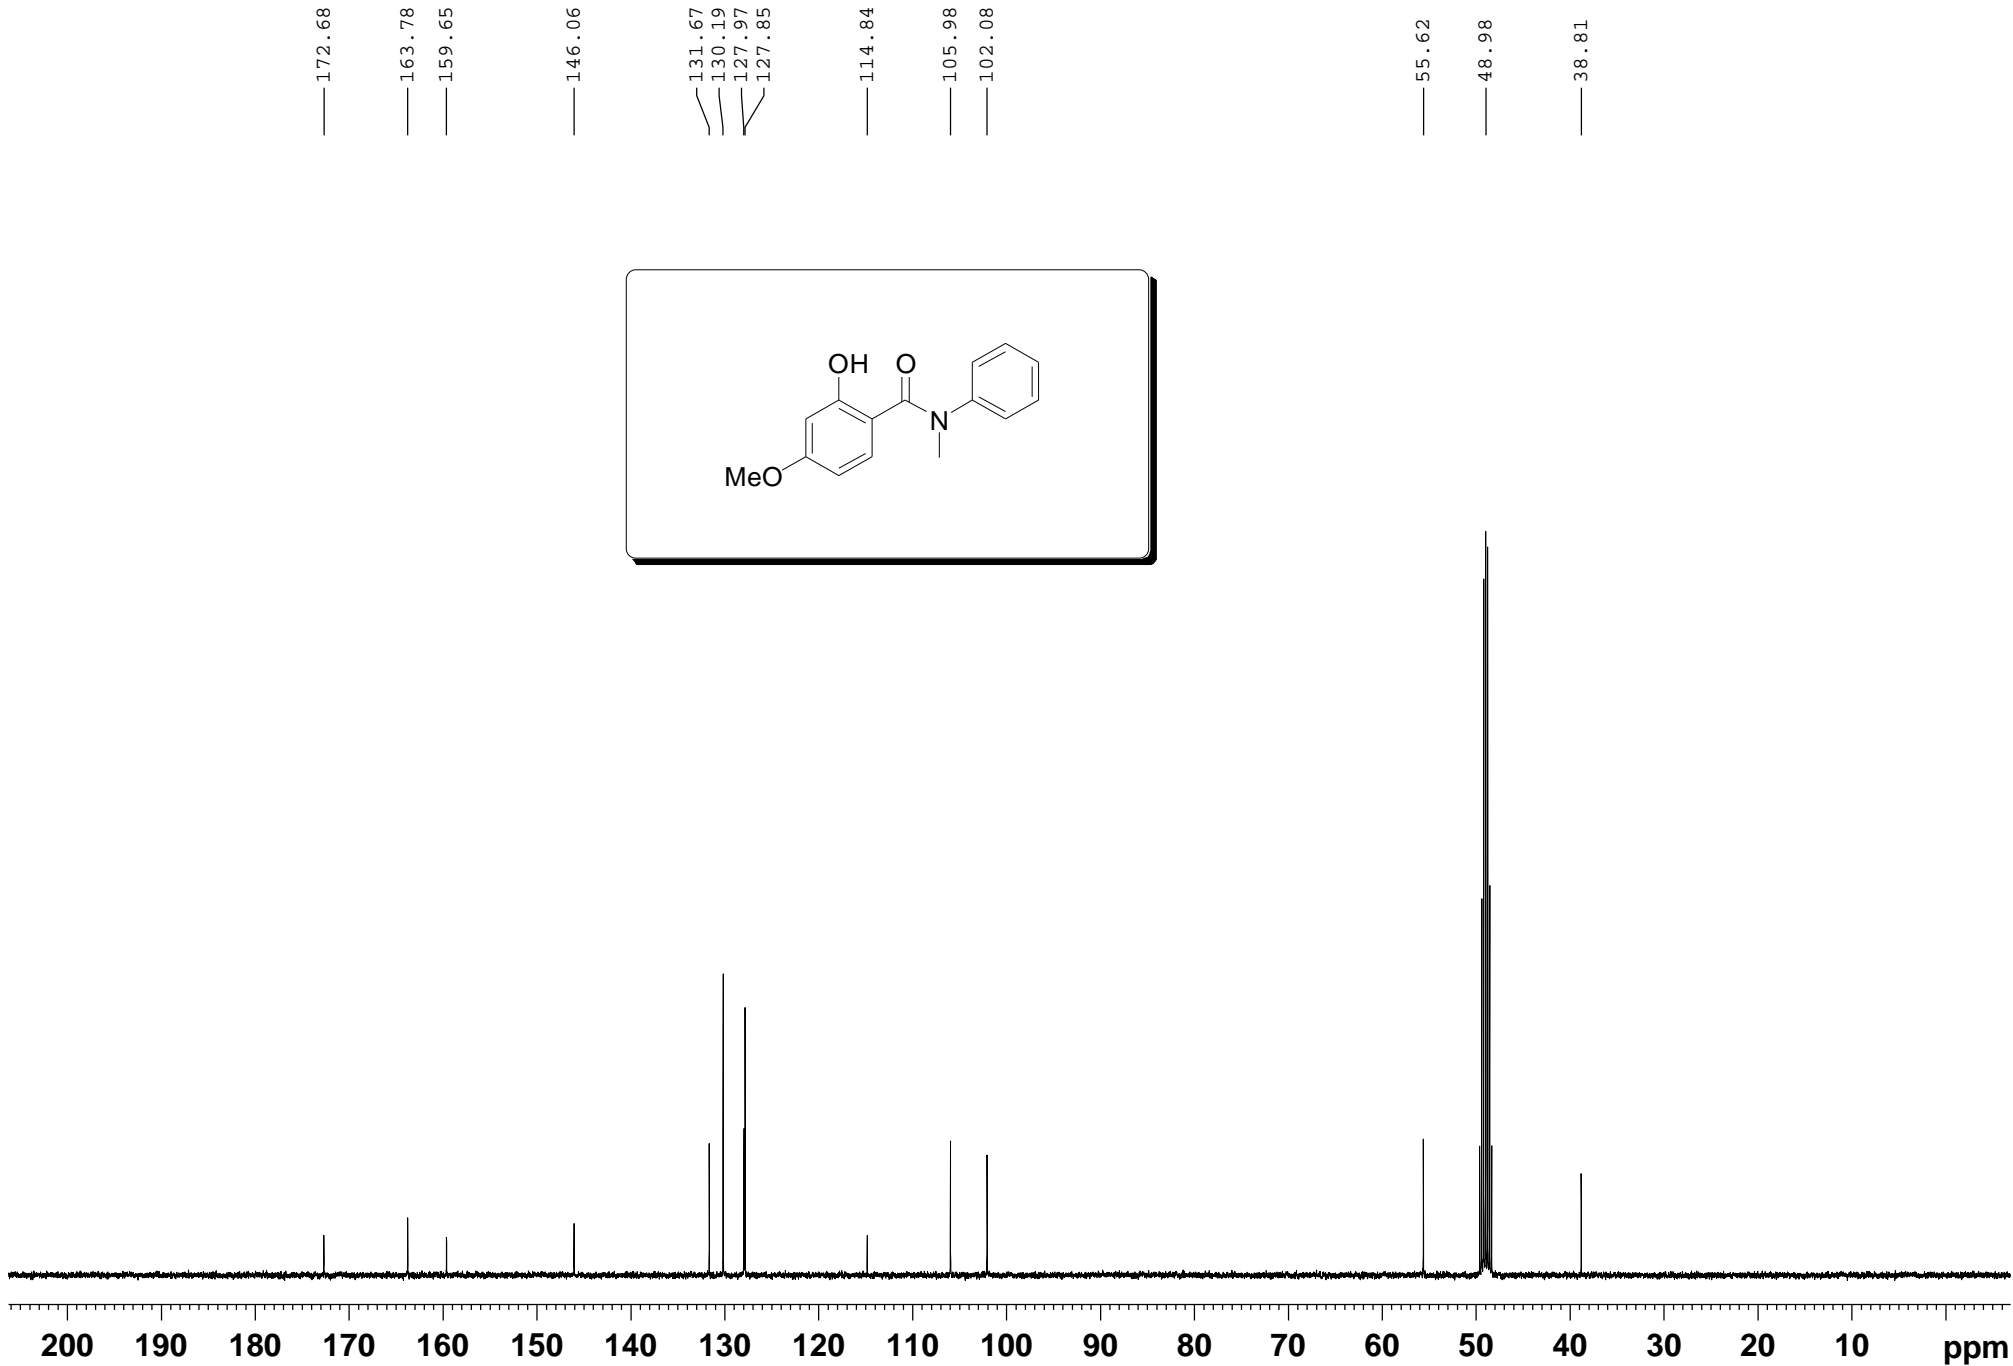



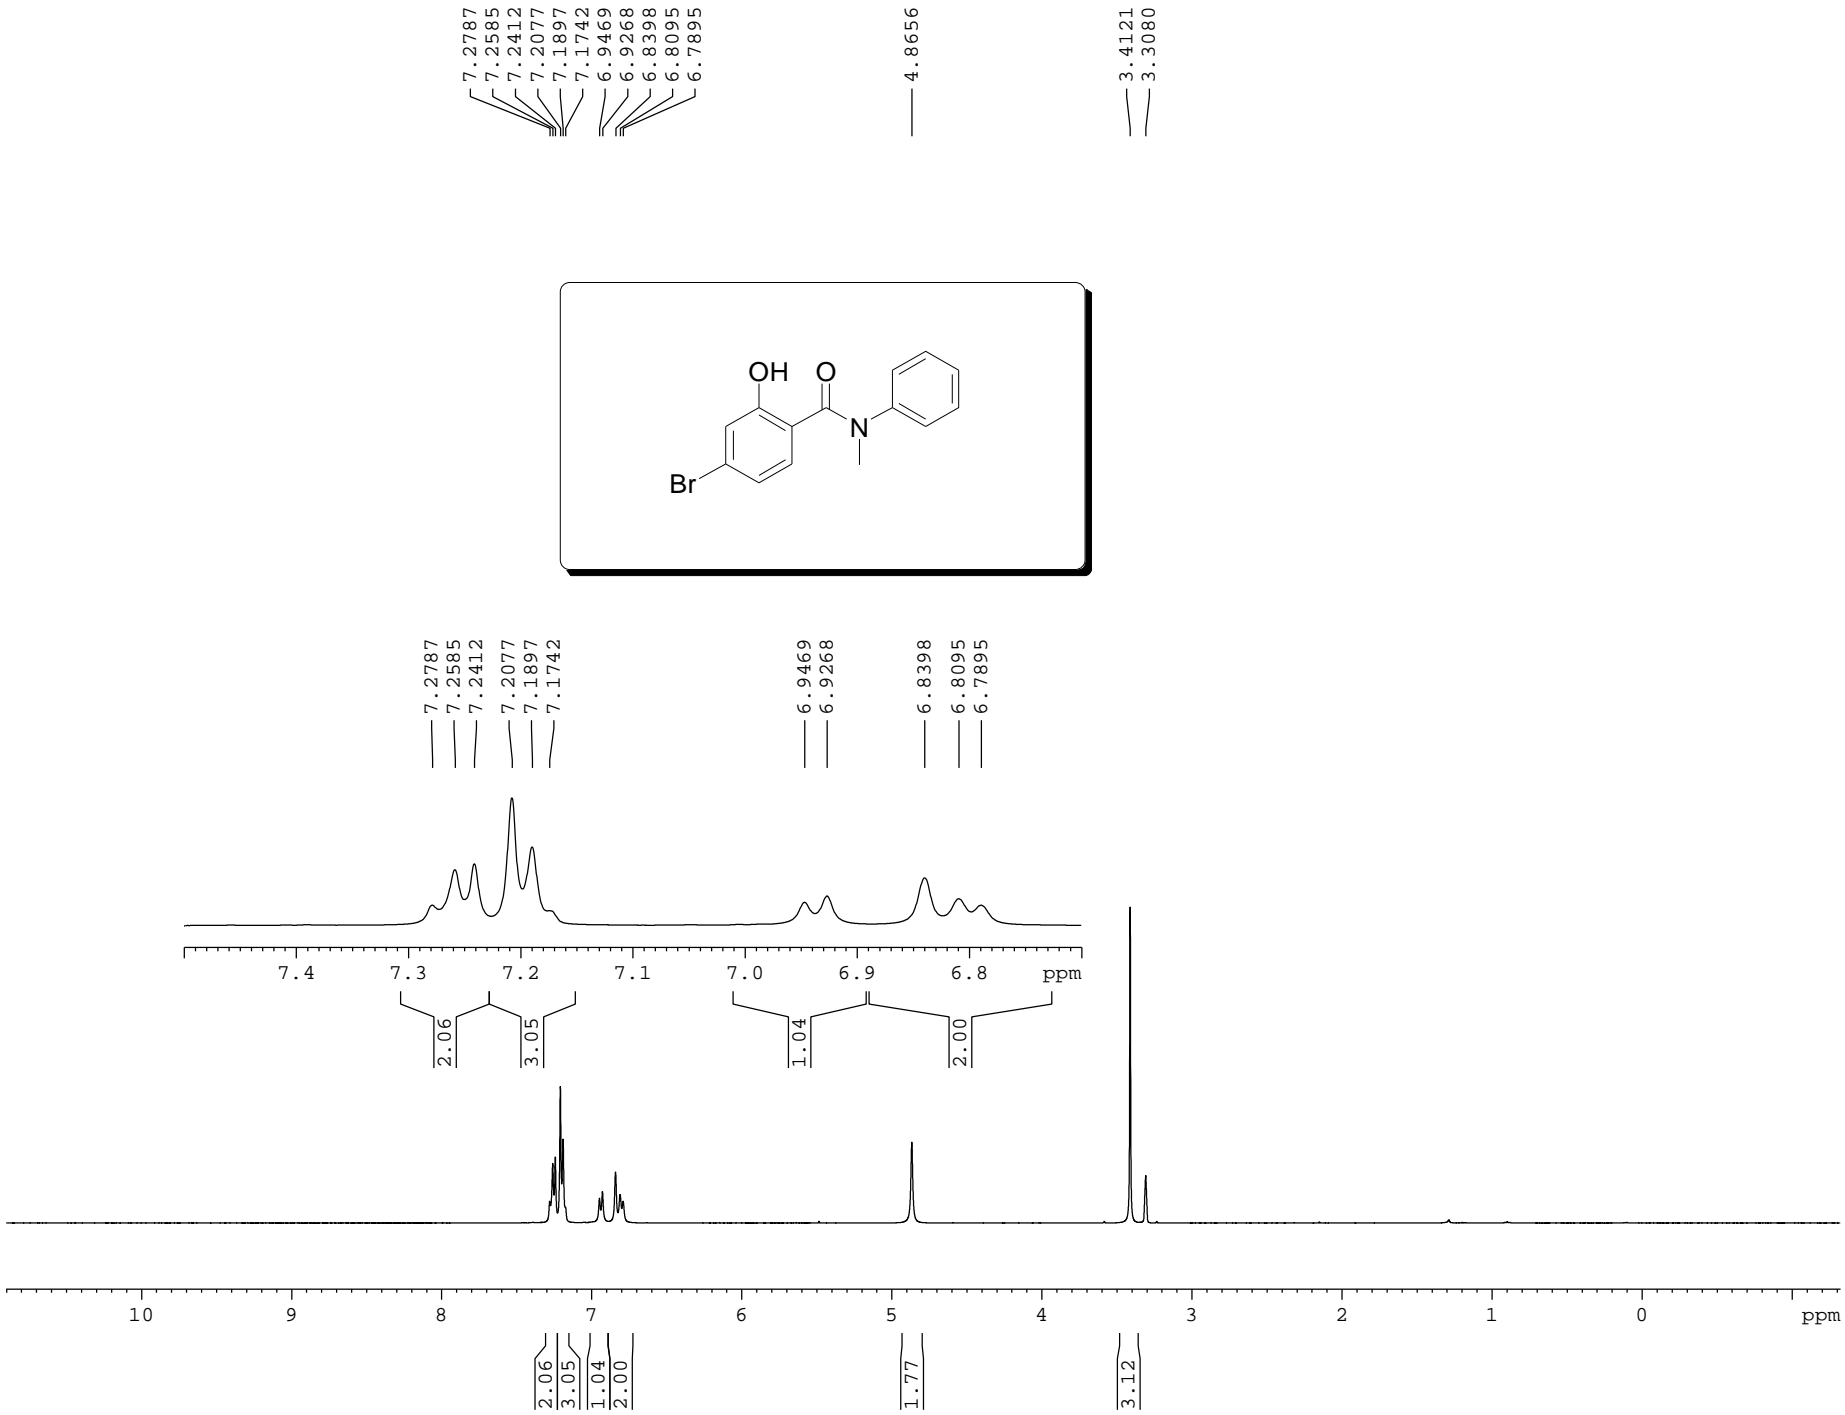

7.2787  
7.2585  
7.2412  
7.2077  
7.1897  
7.1742  
6.9469  
6.9268  
6.8398  
6.8095  
6.7895

— 4.8656

— 3.4121  
— 3.3080

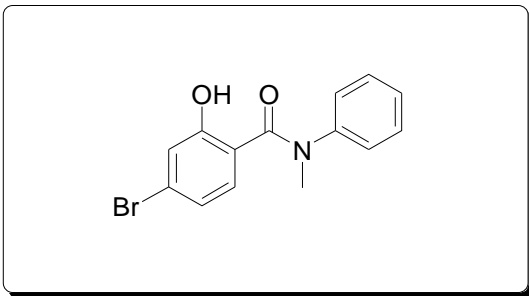

7.2787  
7.2585  
7.2412  
7.2077  
7.1897  
7.1742

— 6.9469  
— 6.9268

— 6.8398  
— 6.8095  
— 6.7895

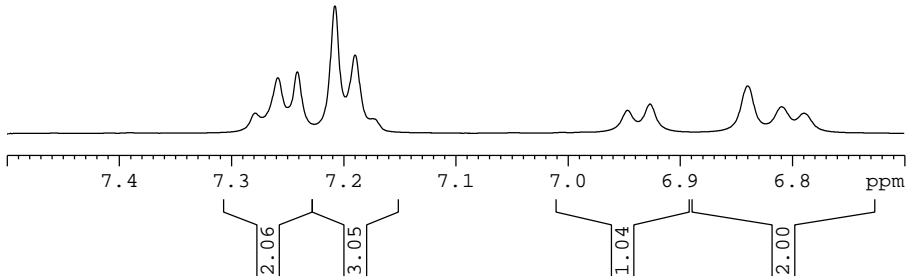

2.06  
3.05  
1.04  
2.00

1.77

3.12

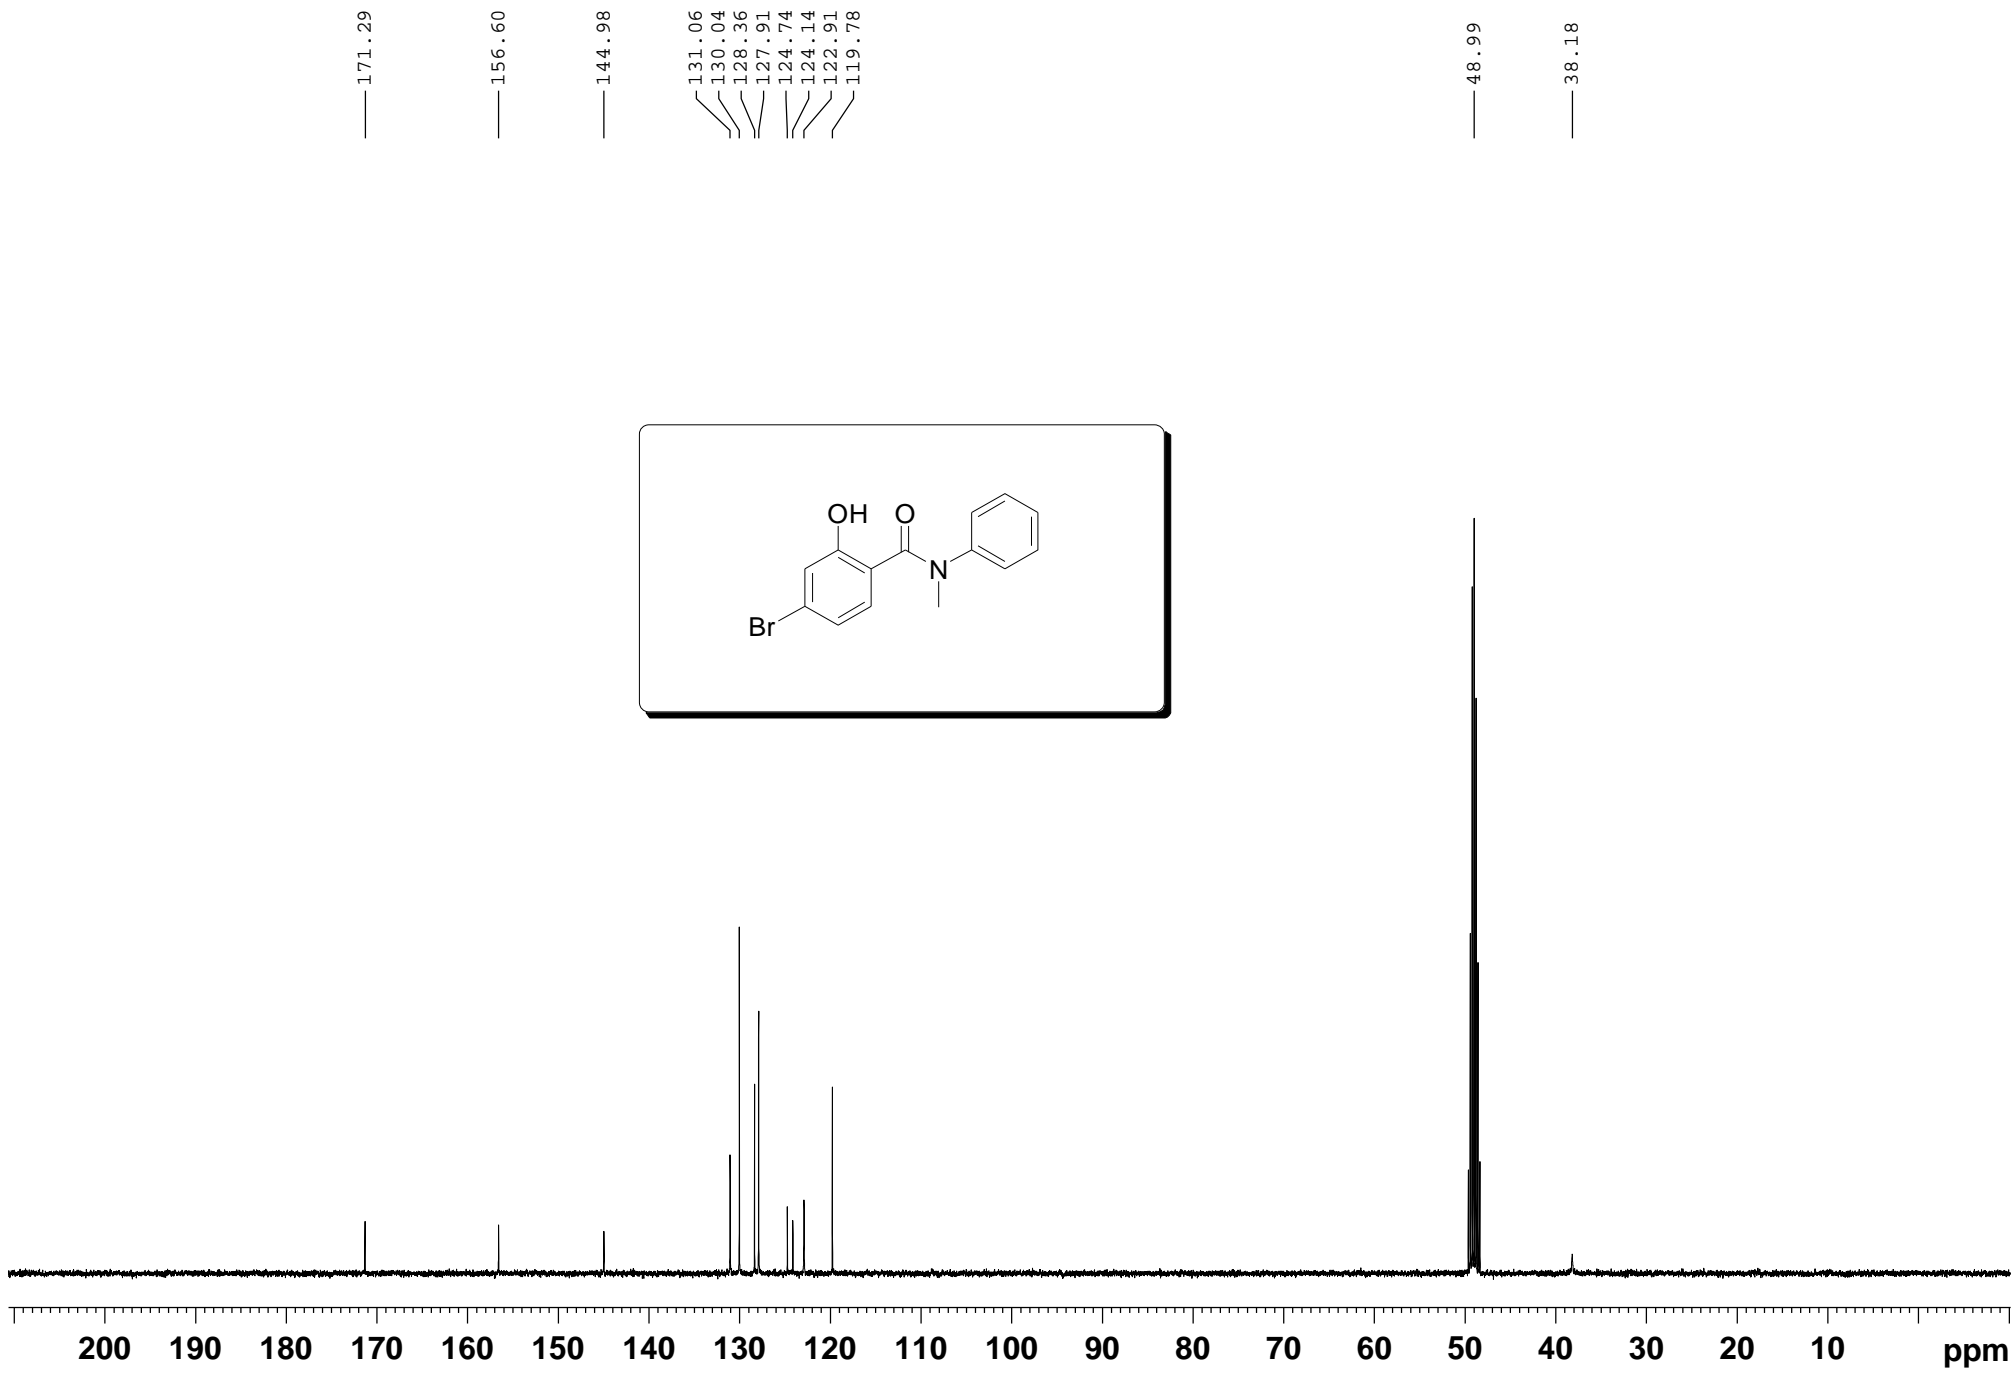

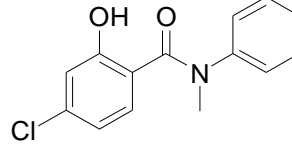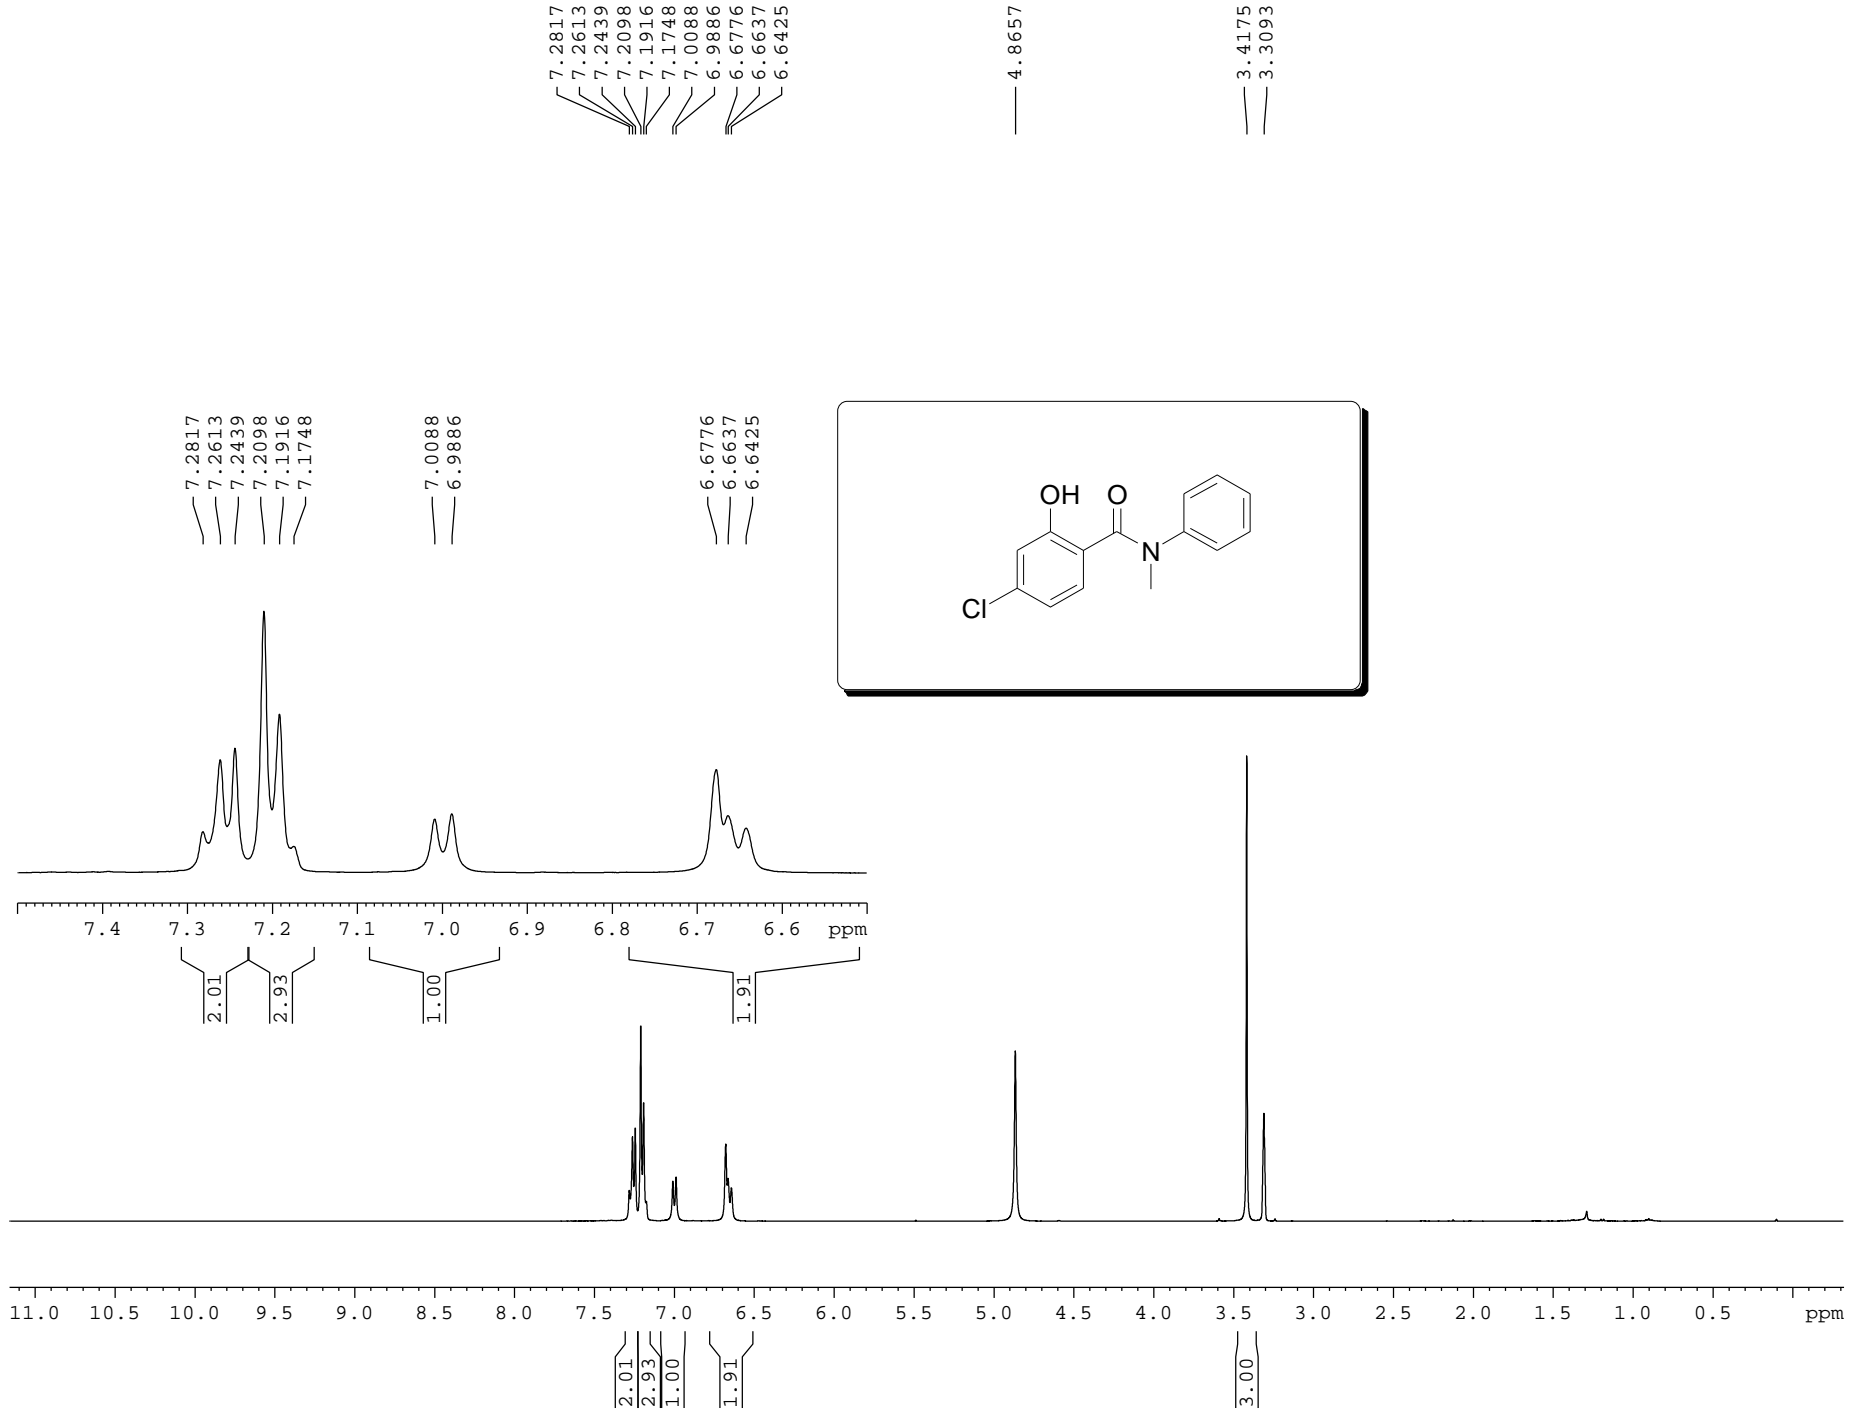

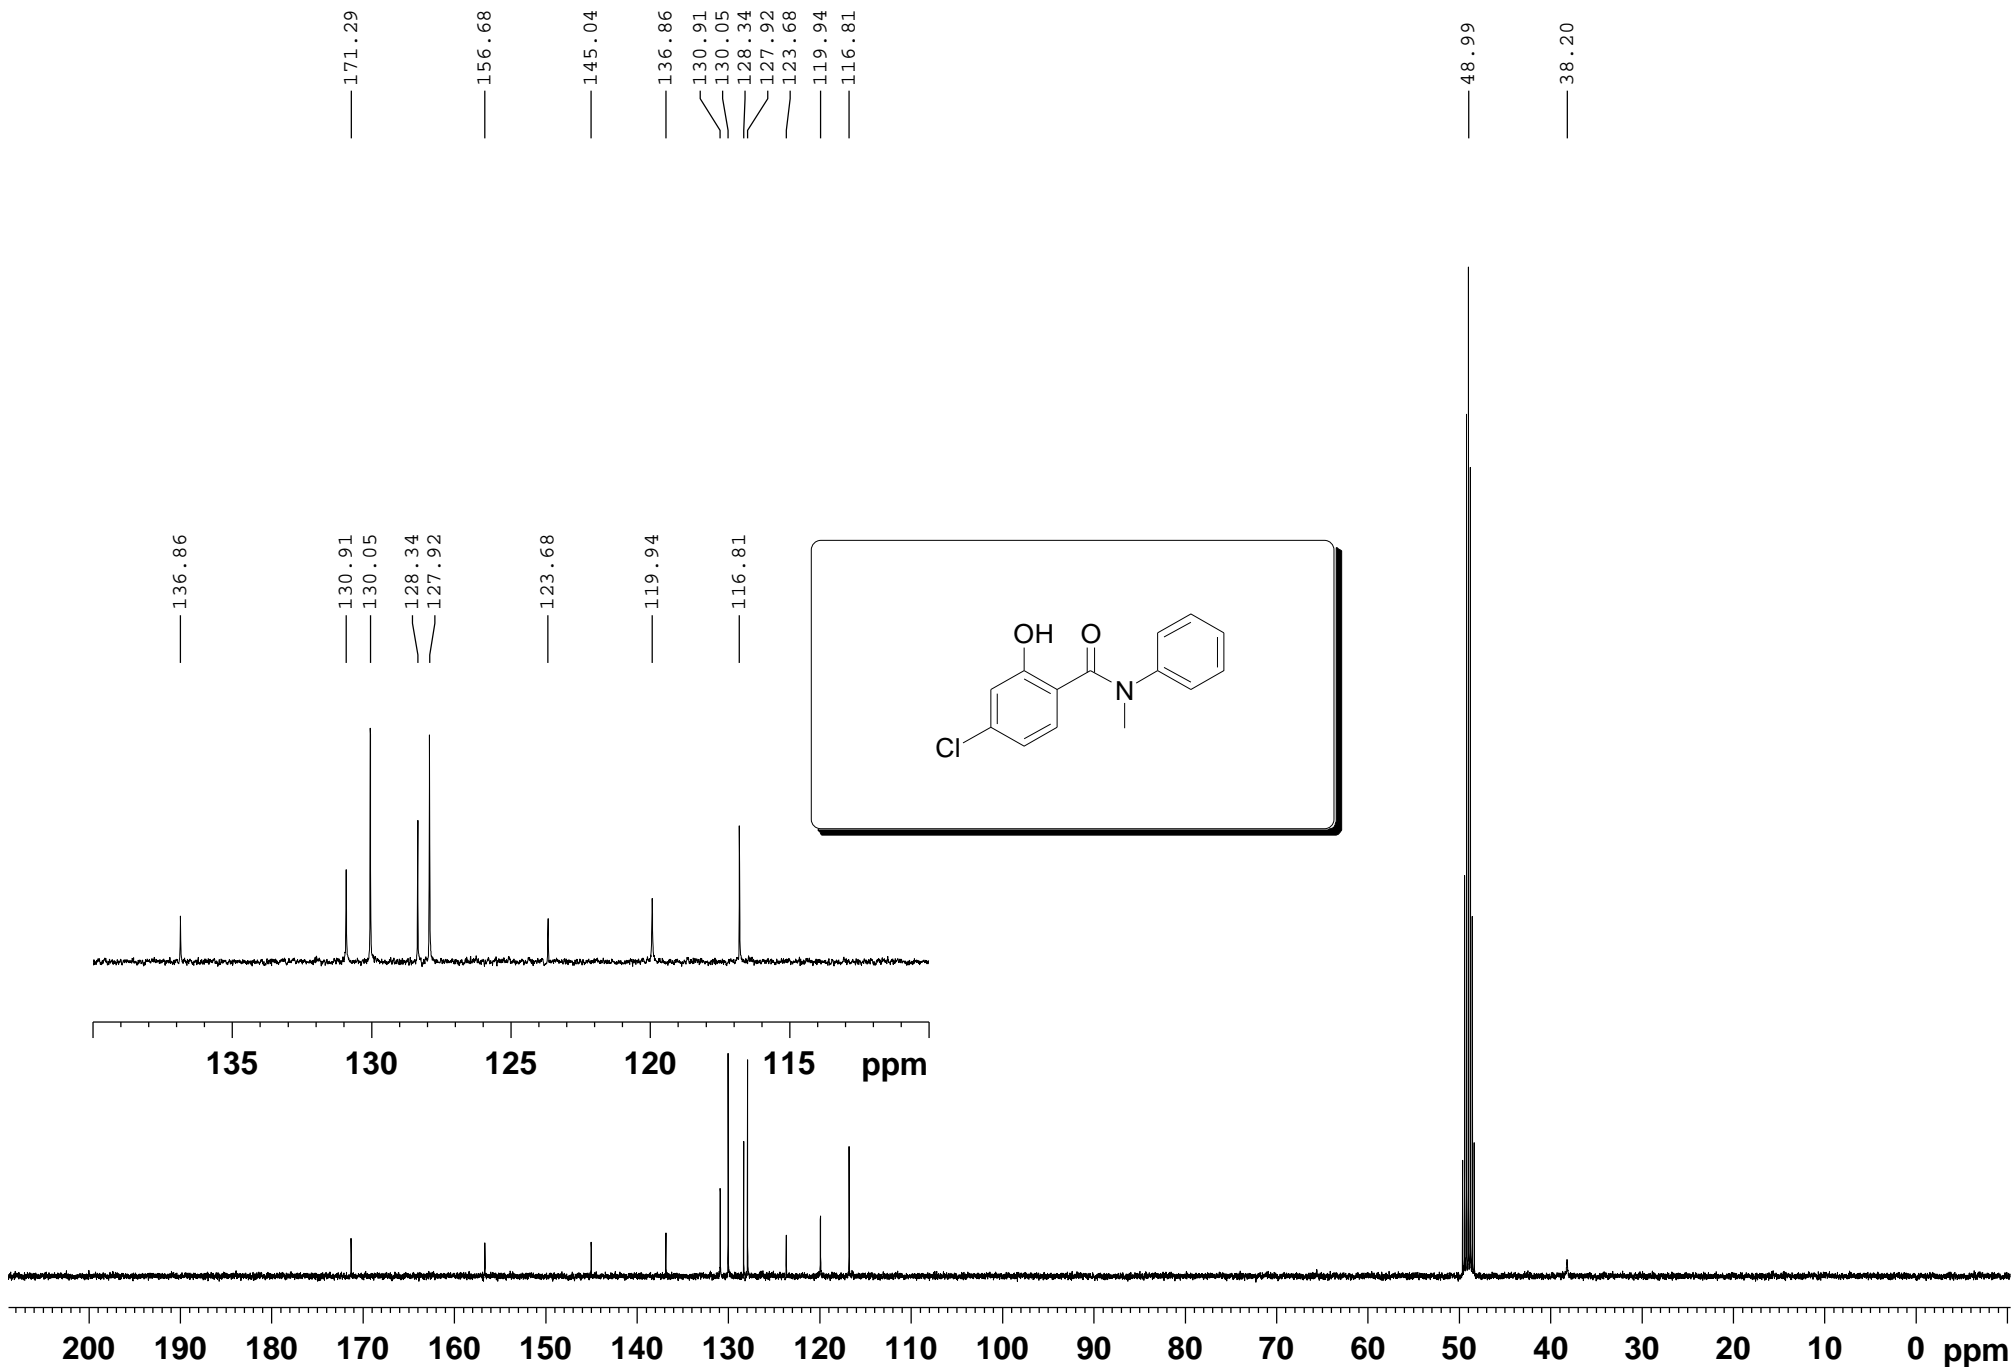

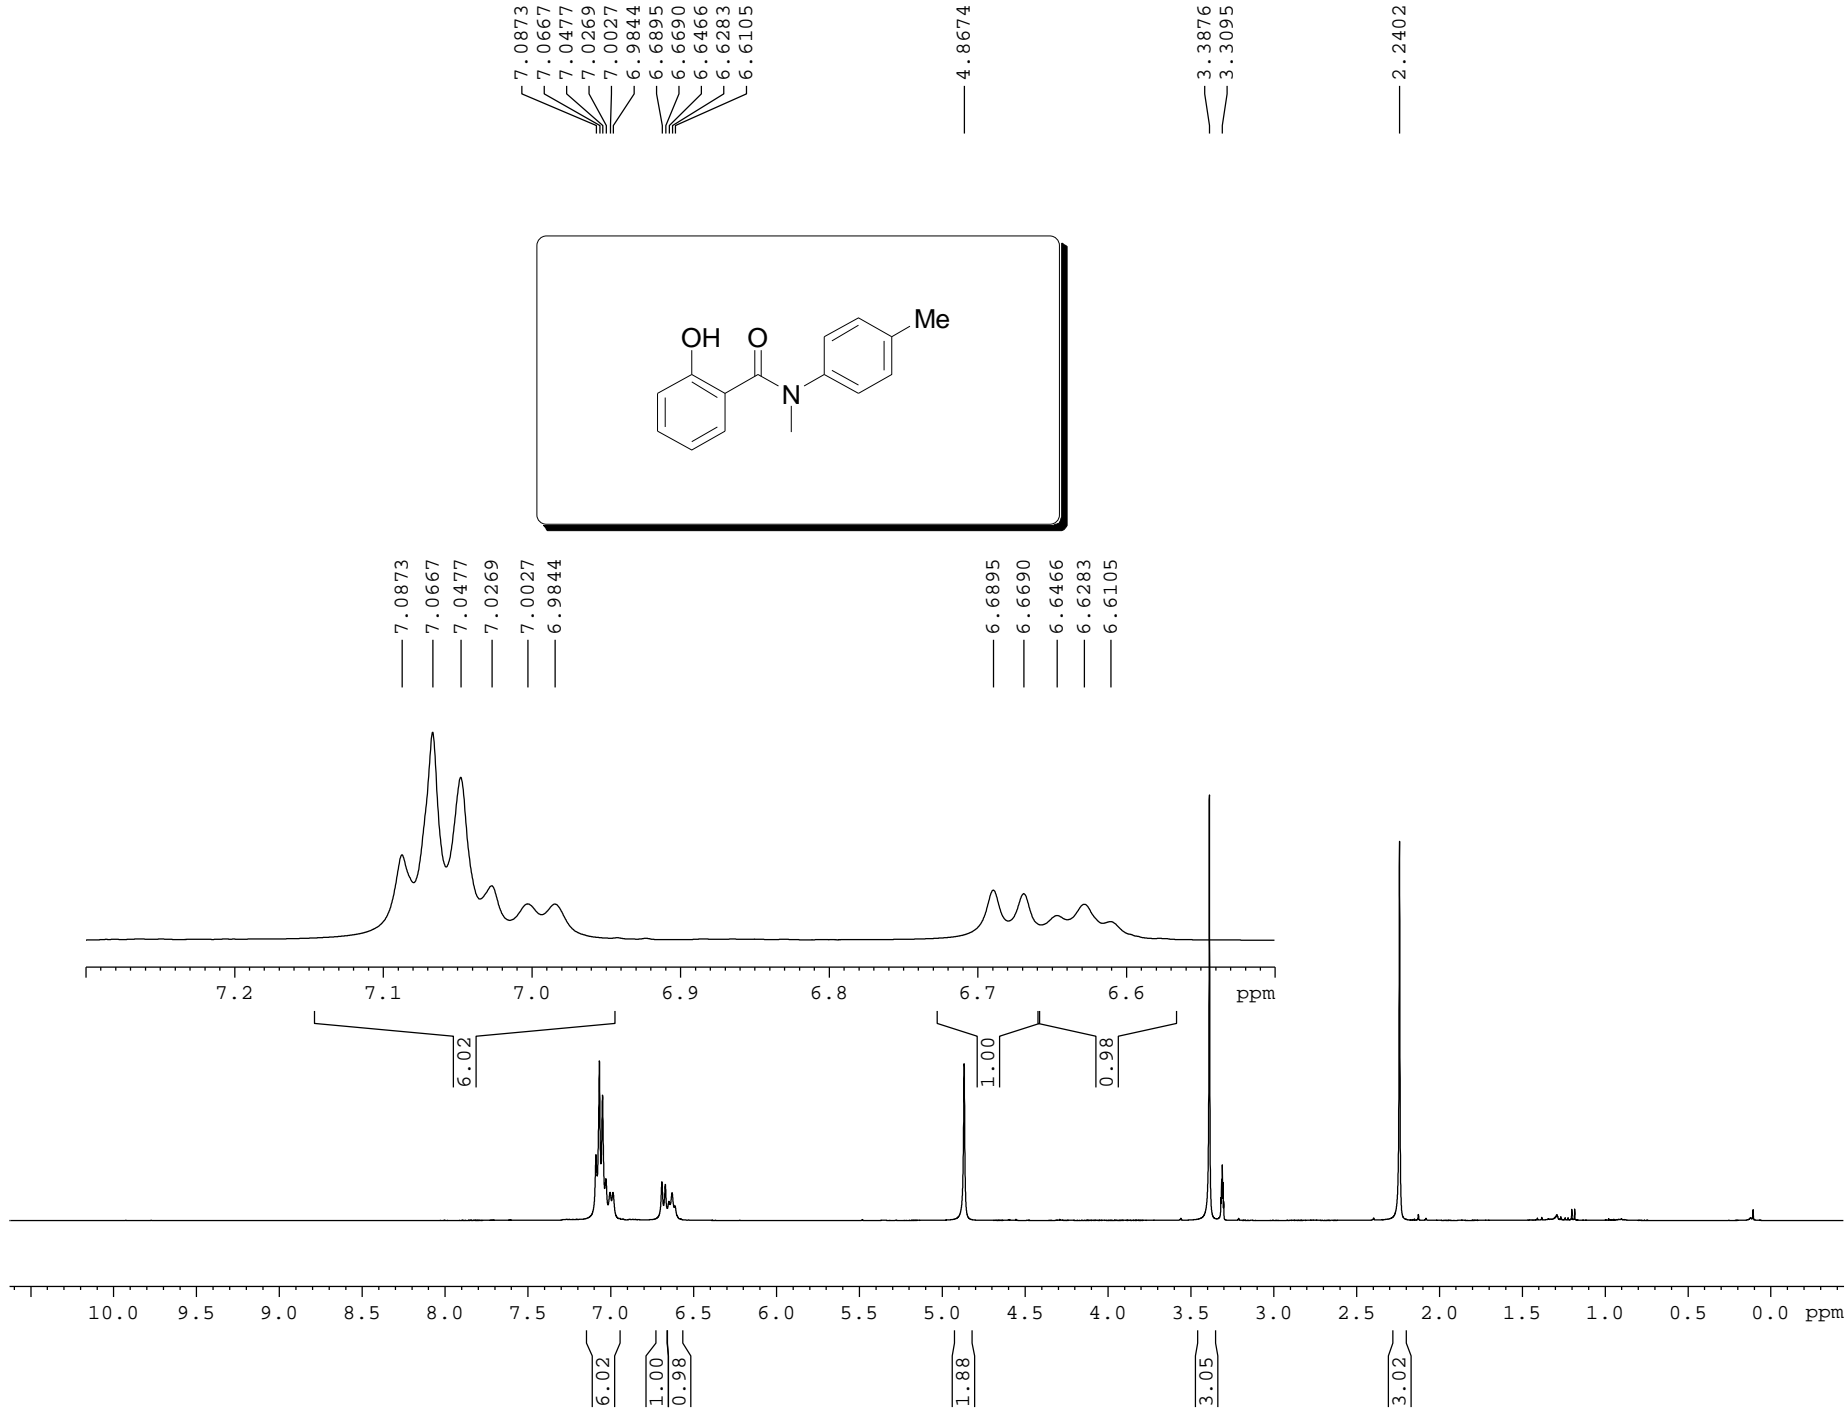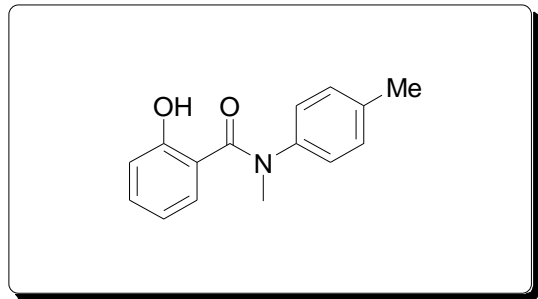

7.0873  
7.0667  
7.0477  
7.0269  
7.0027  
6.9844

6.6895  
6.6690  
6.6466  
6.6283  
6.6105

4.8674

3.3876  
3.3095

2.2402

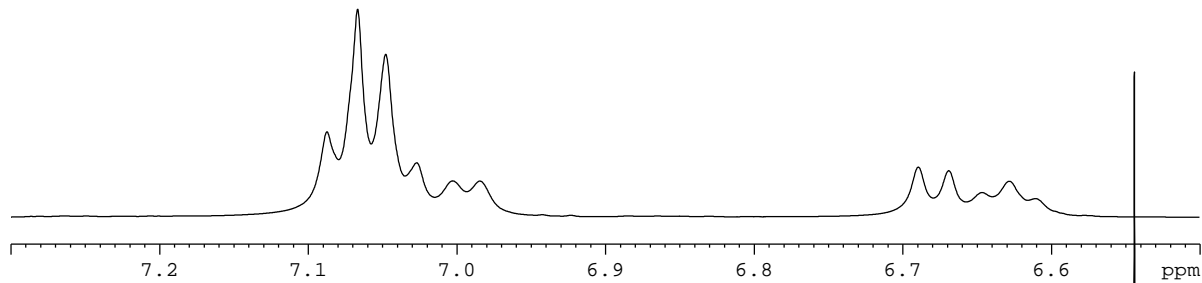

6.02  
1.00  
0.98

1.88

3.05

3.02

— 172.44

— 155.85

— 142.72

— 138.15

— 131.75

— 130.50

— 129.69

— 127.63

— 124.50

— 119.77

— 116.83

— 49.00

— 38.36

— 20.96

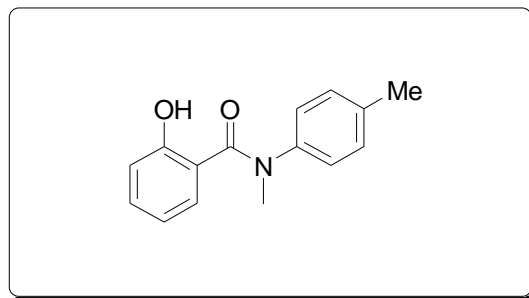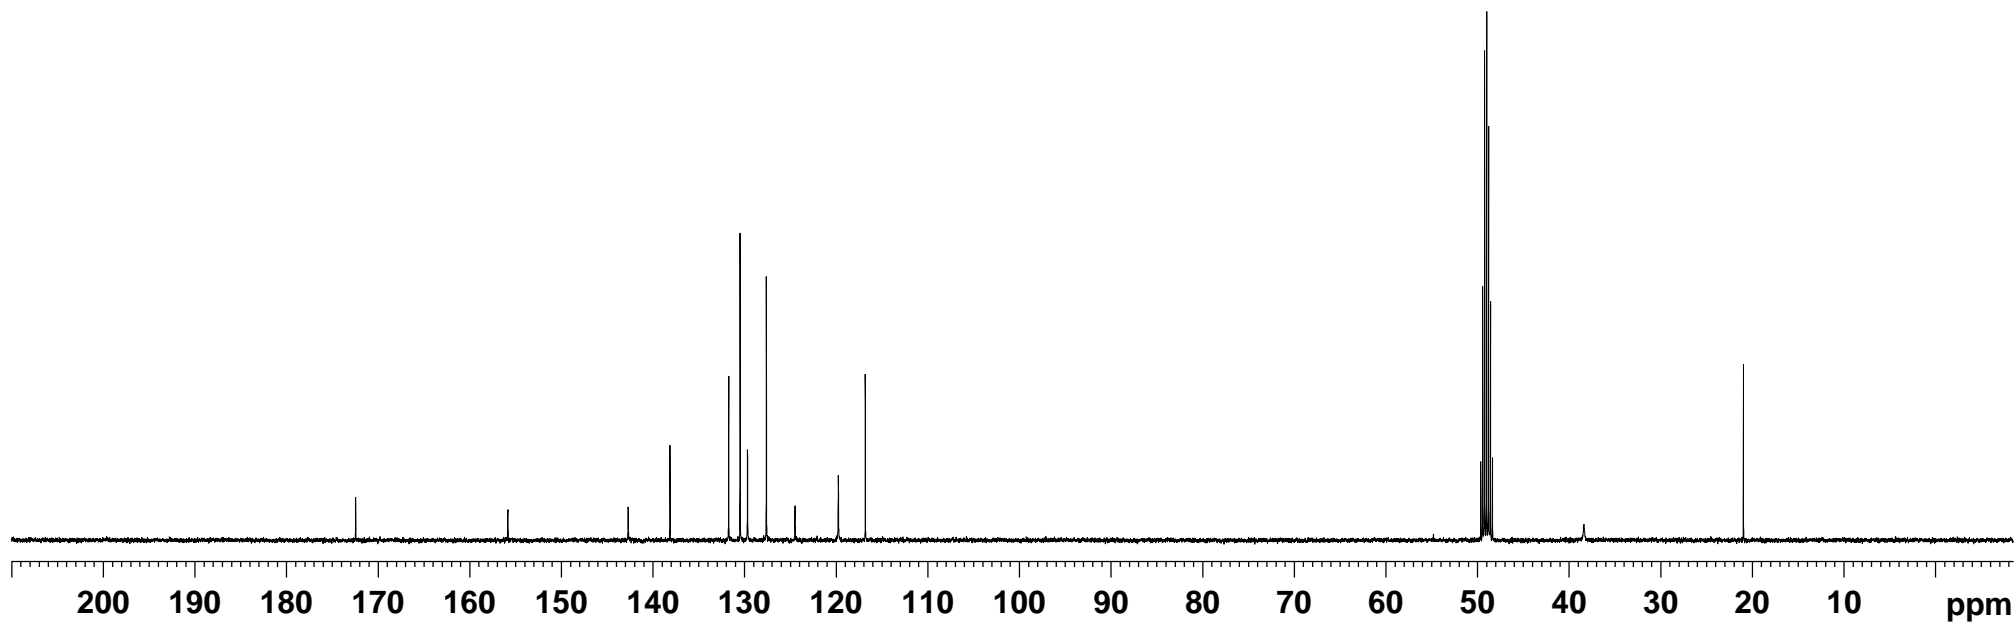

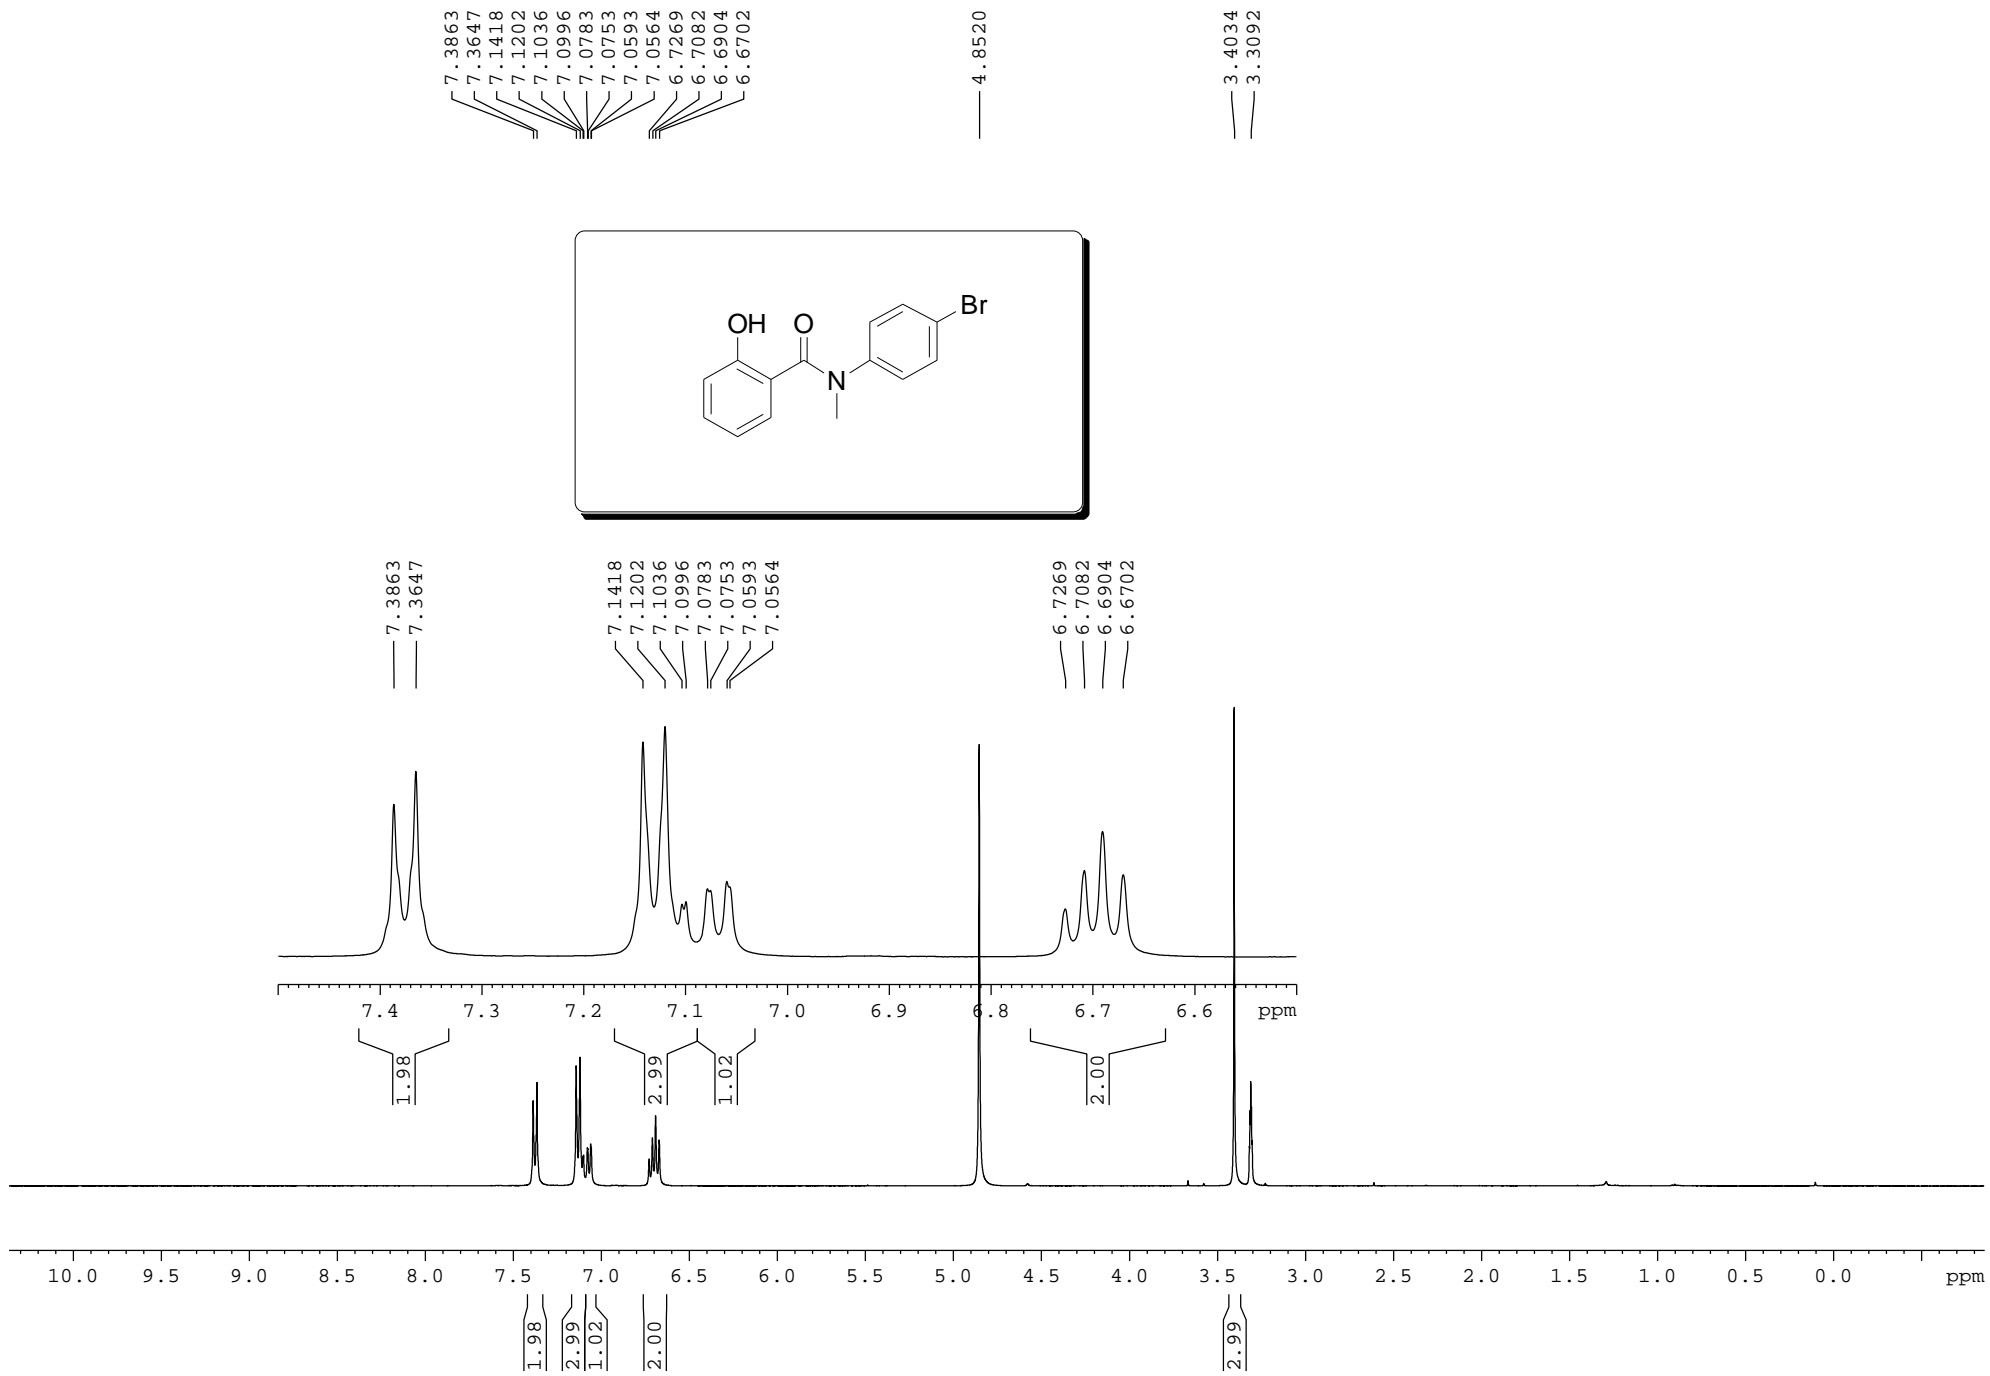

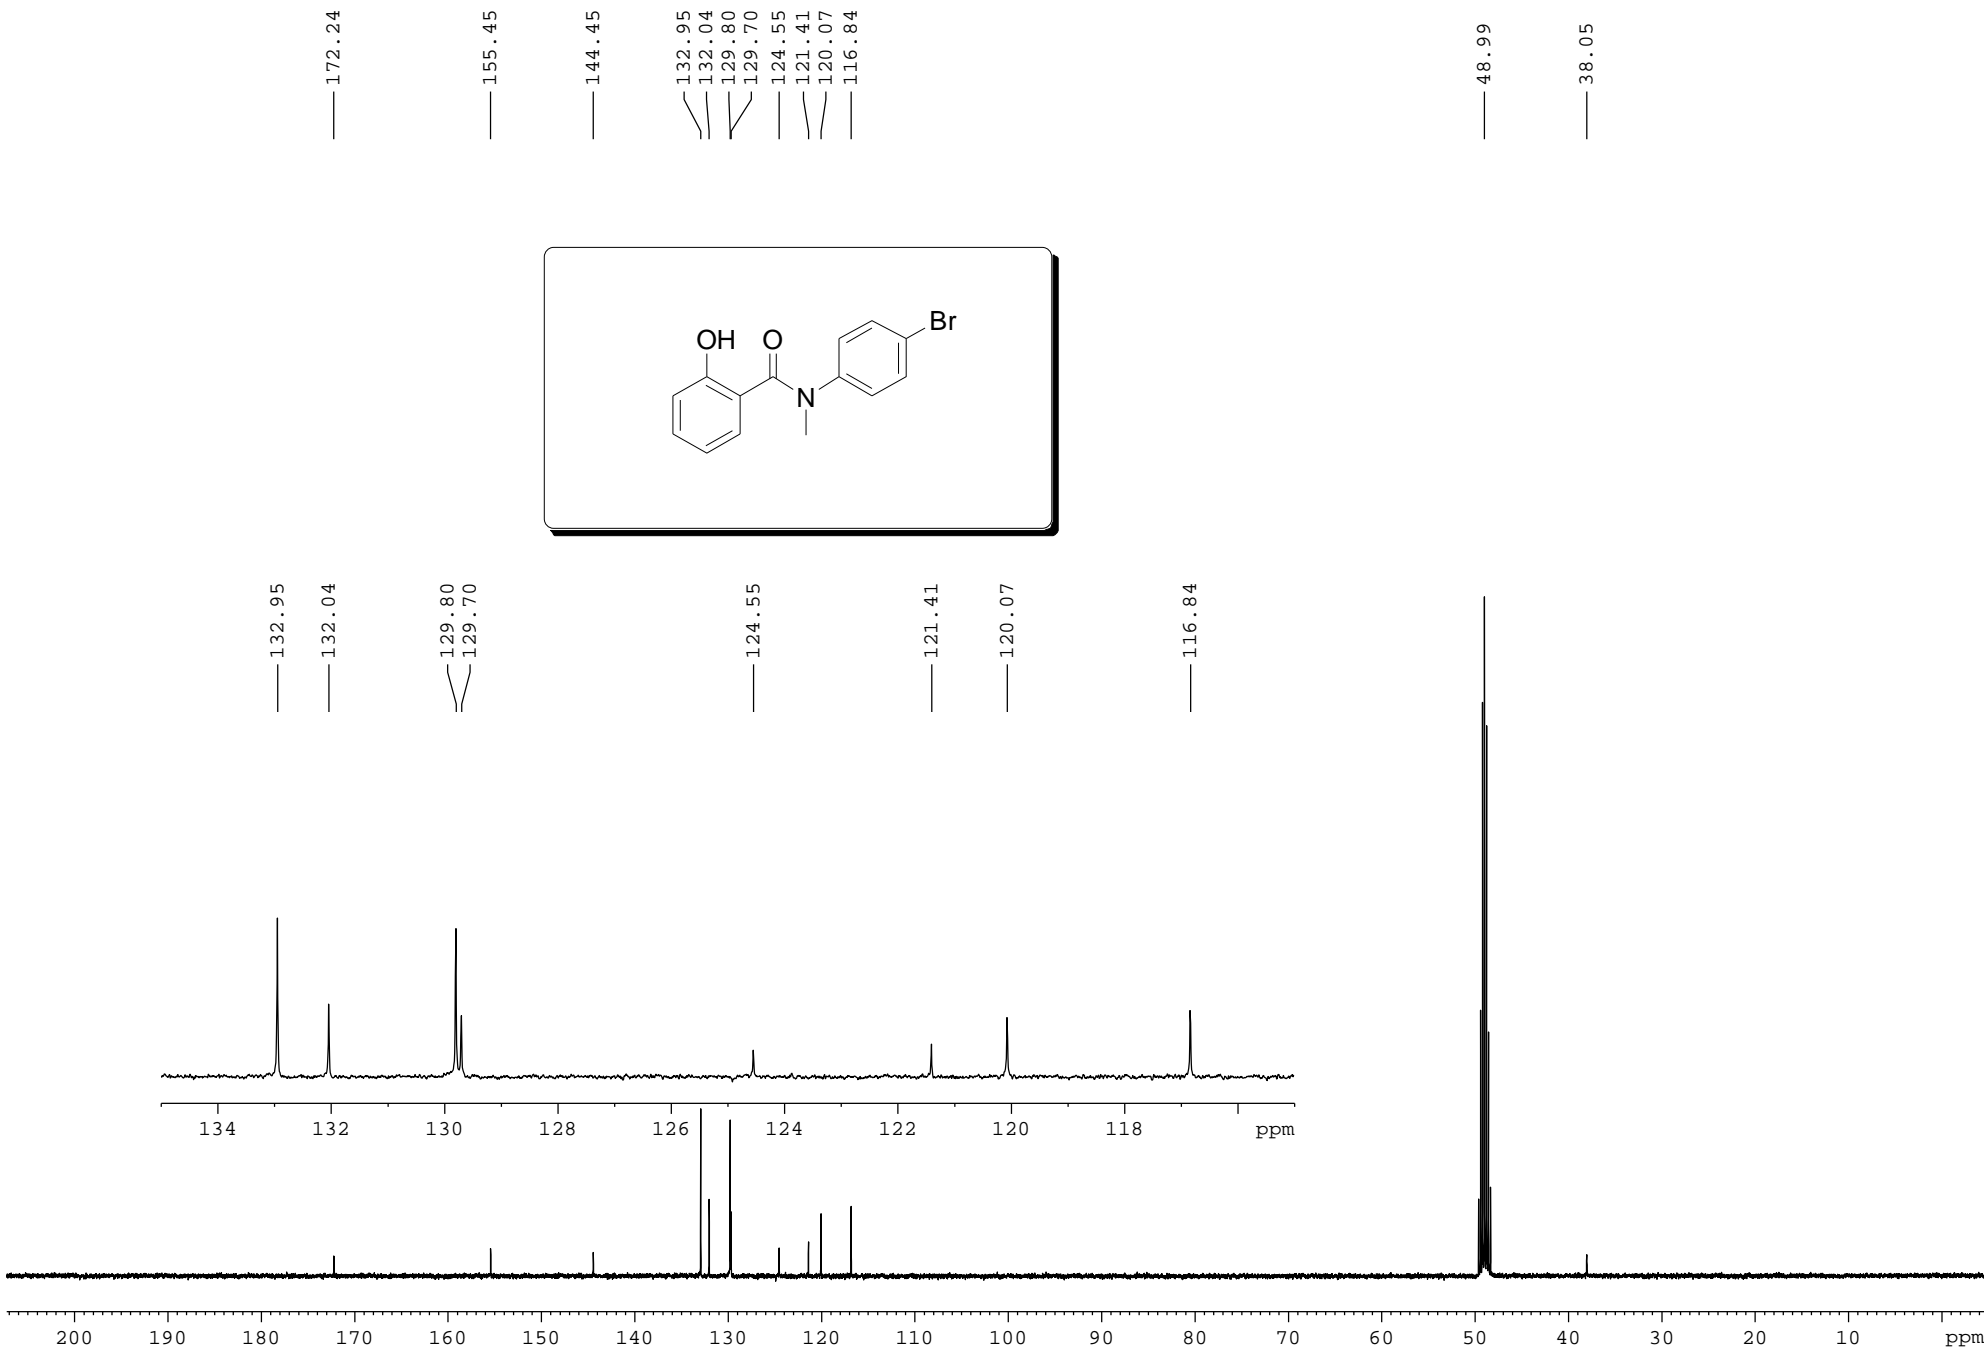



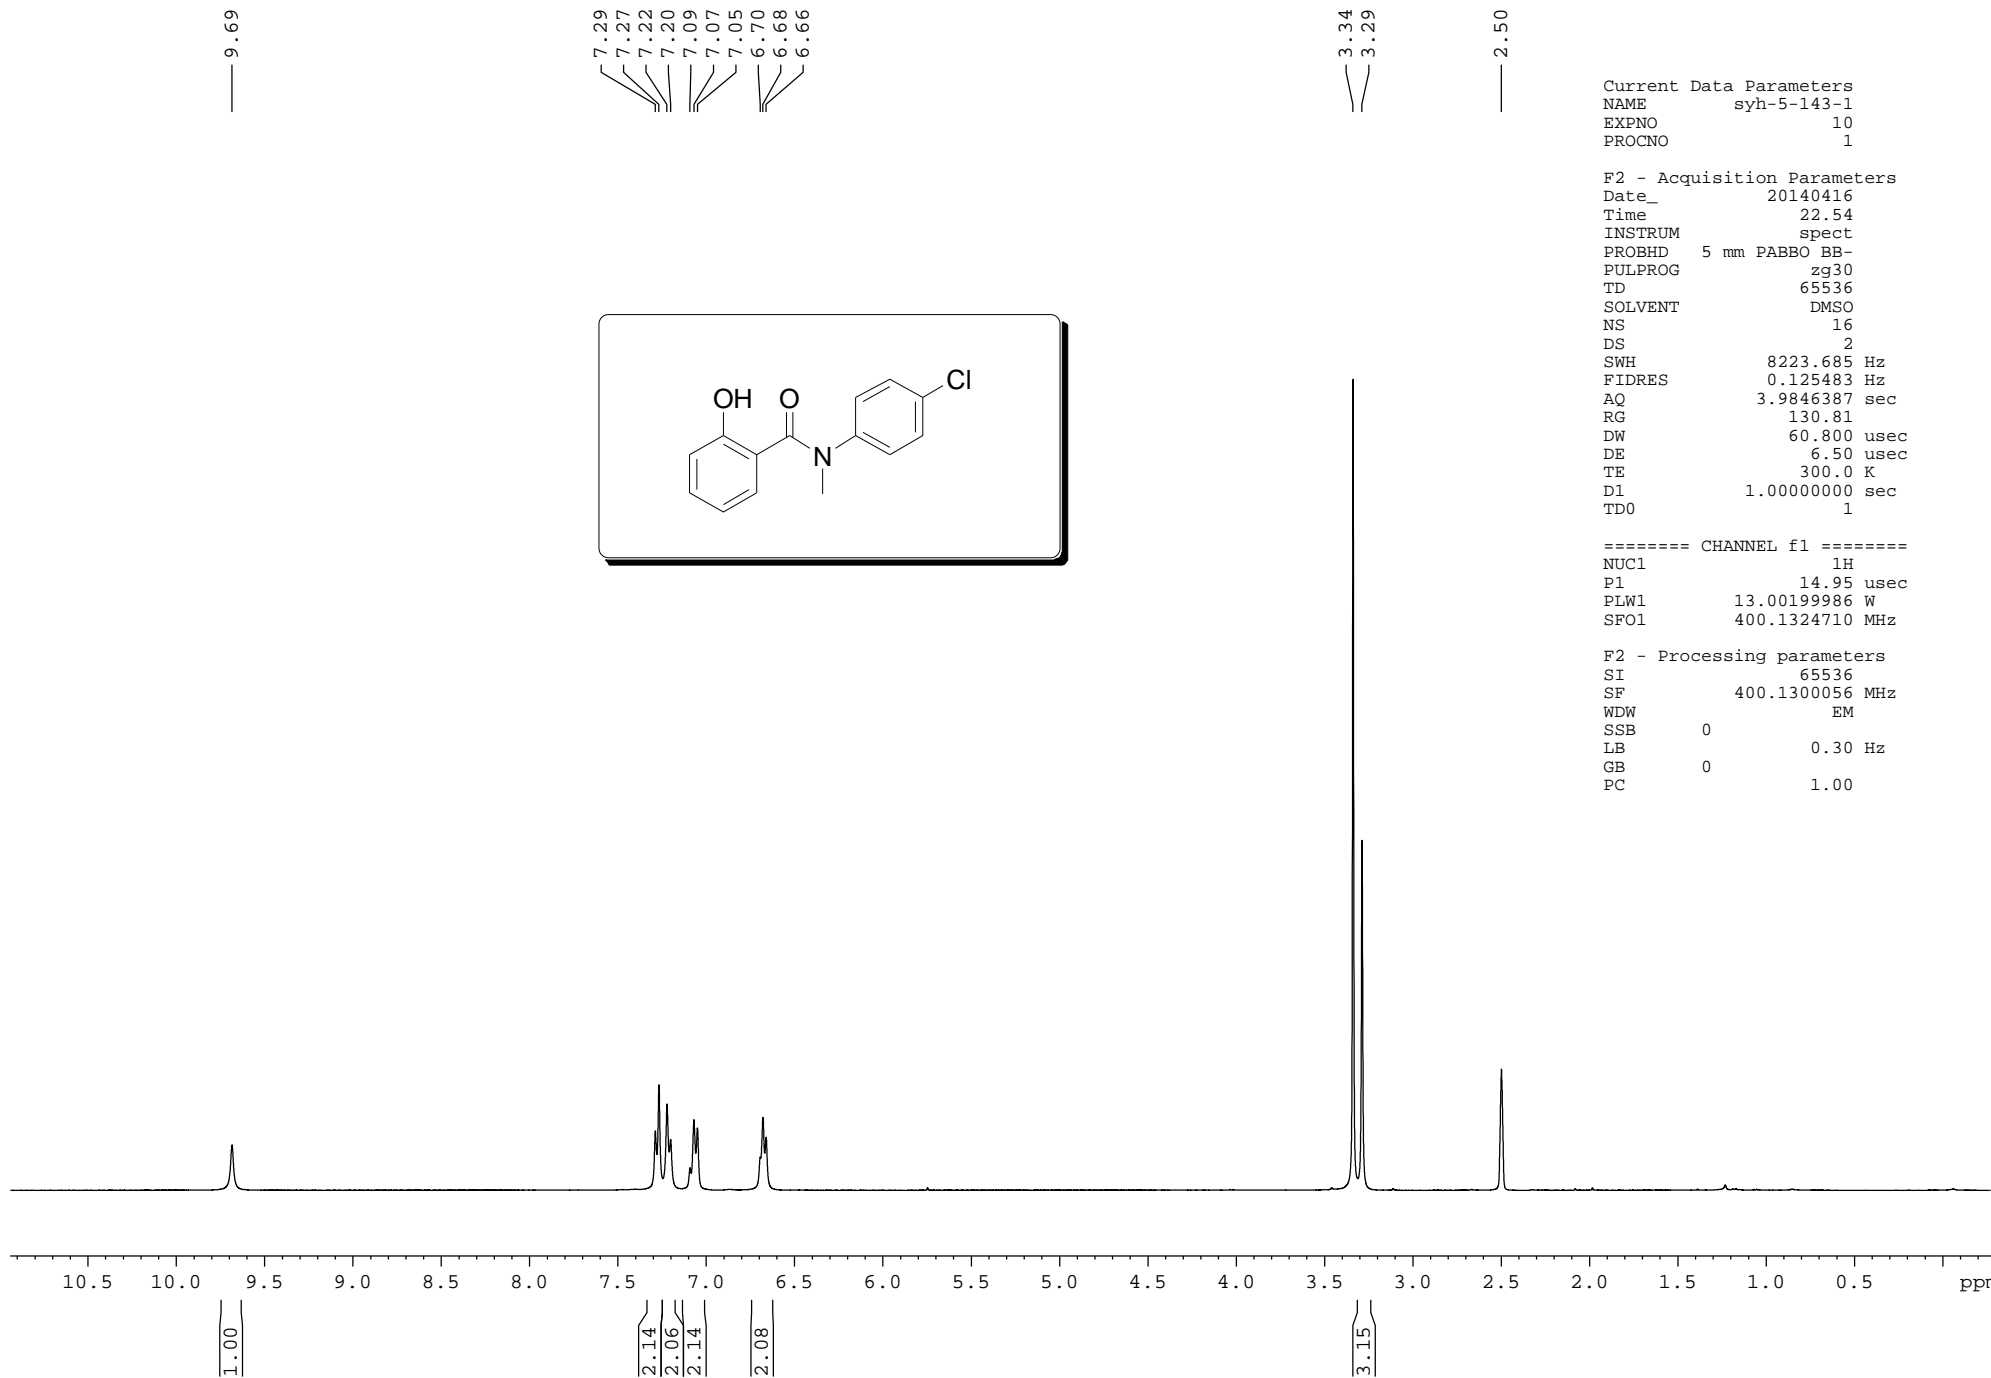

Current Data Parameters  
 NAME syh-5-143-1  
 EXPNO 10  
 PROCNO 1

F2 - Acquisition Parameters  
 Date\_ 20140416  
 Time 22.54  
 INSTRUM spect  
 PROBHD 5 mm PABBO BB-  
 PULPROG zg30  
 TD 65536  
 SOLVENT DMSO  
 NS 16  
 DS 2  
 SWH 8223.685 Hz  
 FIDRES 0.125483 Hz  
 AQ 3.9846387 sec  
 RG 130.81  
 DW 60.800 usec  
 DE 6.50 usec  
 TE 300.0 K  
 D1 1.00000000 sec  
 TD0 1

==== CHANNEL f1 =====  
 NUC1 1H  
 P1 14.95 usec  
 PLW1 13.00199986 W  
 SFO1 400.1324710 MHz

F2 - Processing parameters  
 SI 65536  
 SF 400.1300056 MHz  
 WDW EM  
 SSB 0  
 LB 0.30 Hz  
 GB 0  
 PC 1.00

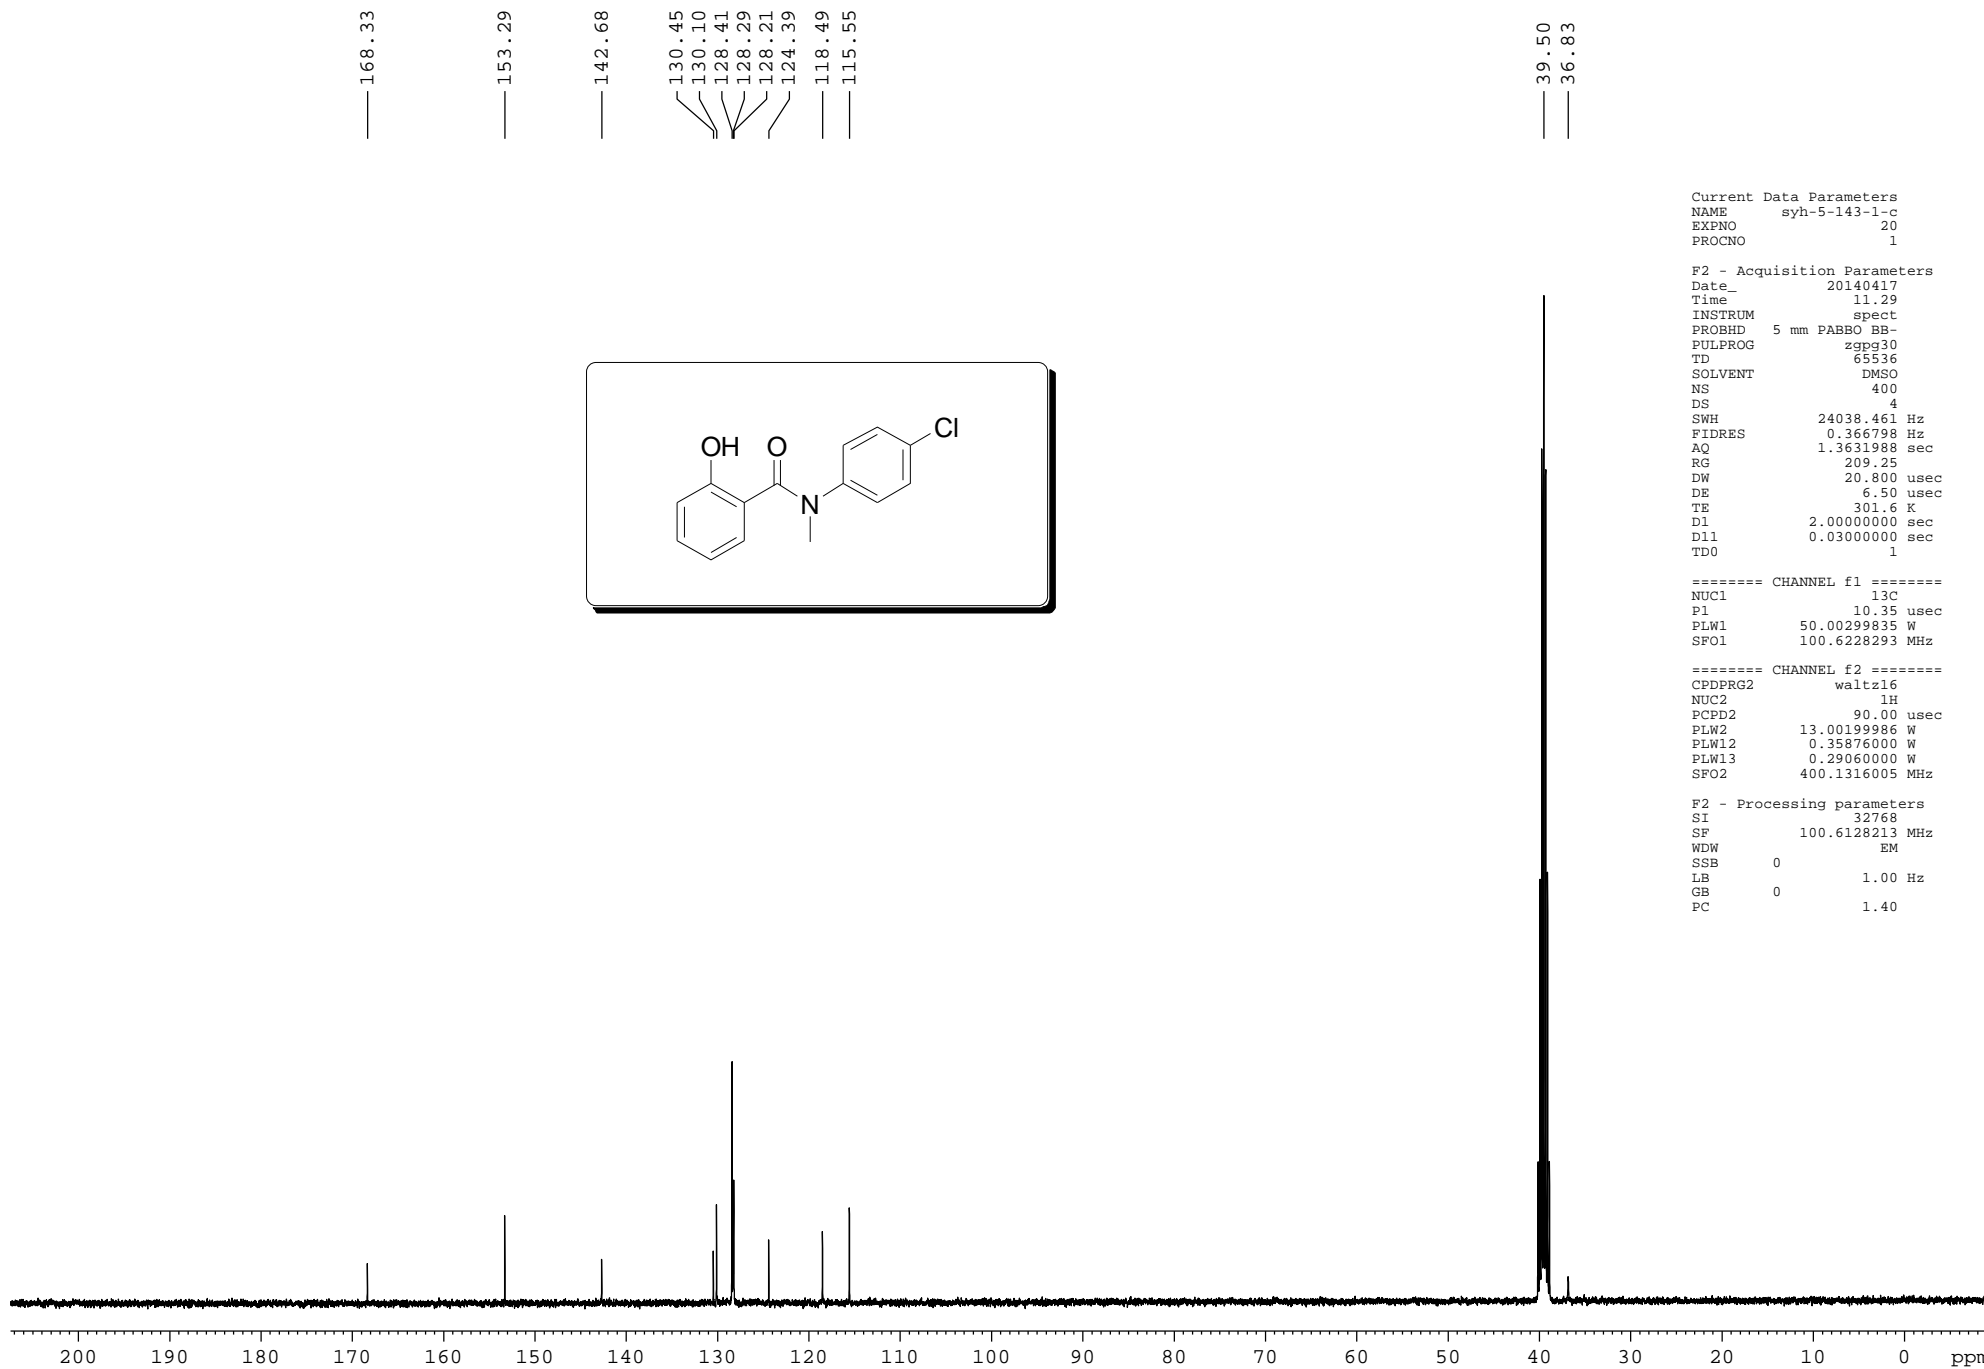

Current Data Parameters  
 NAME syh-5-143-1-c  
 EXPNO 20  
 PROCNO 1

F2 - Acquisition Parameters  
 Date\_ 20140417  
 Time\_ 11.29  
 INSTRUM spect  
 PROBHD 5 mm PABBO BB-  
 PULPROG zgpg30  
 TD 65536  
 SOLVENT DMSO  
 NS 400  
 DS 4  
 SWH 24038.461 Hz  
 FIDRES 0.366798 Hz  
 AQ 1.3631988 sec  
 RG 209.25  
 DW 20.800 usec  
 DE 6.50 usec  
 TE 301.6 K  
 D1 2.0000000 sec  
 D11 0.0300000 sec  
 TD0 1

===== CHANNEL f1 =====  
 NUC1 13C  
 P1 10.35 usec  
 PLW1 50.00299835 W  
 SFO1 100.6228293 MHz

===== CHANNEL f2 =====  
 CPDPRG2 waltz16  
 NUC2 1H  
 PCPD2 90.00 usec  
 PLW2 13.00199986 W  
 PLW12 0.35876000 W  
 PLW13 0.29060000 W  
 SFO2 400.1316005 MHz

F2 - Processing parameters  
 SI 32768  
 SF 100.6128213 MHz  
 WDW EM  
 SSB 0  
 LB 1.00 Hz  
 GB 0  
 PC 1.40

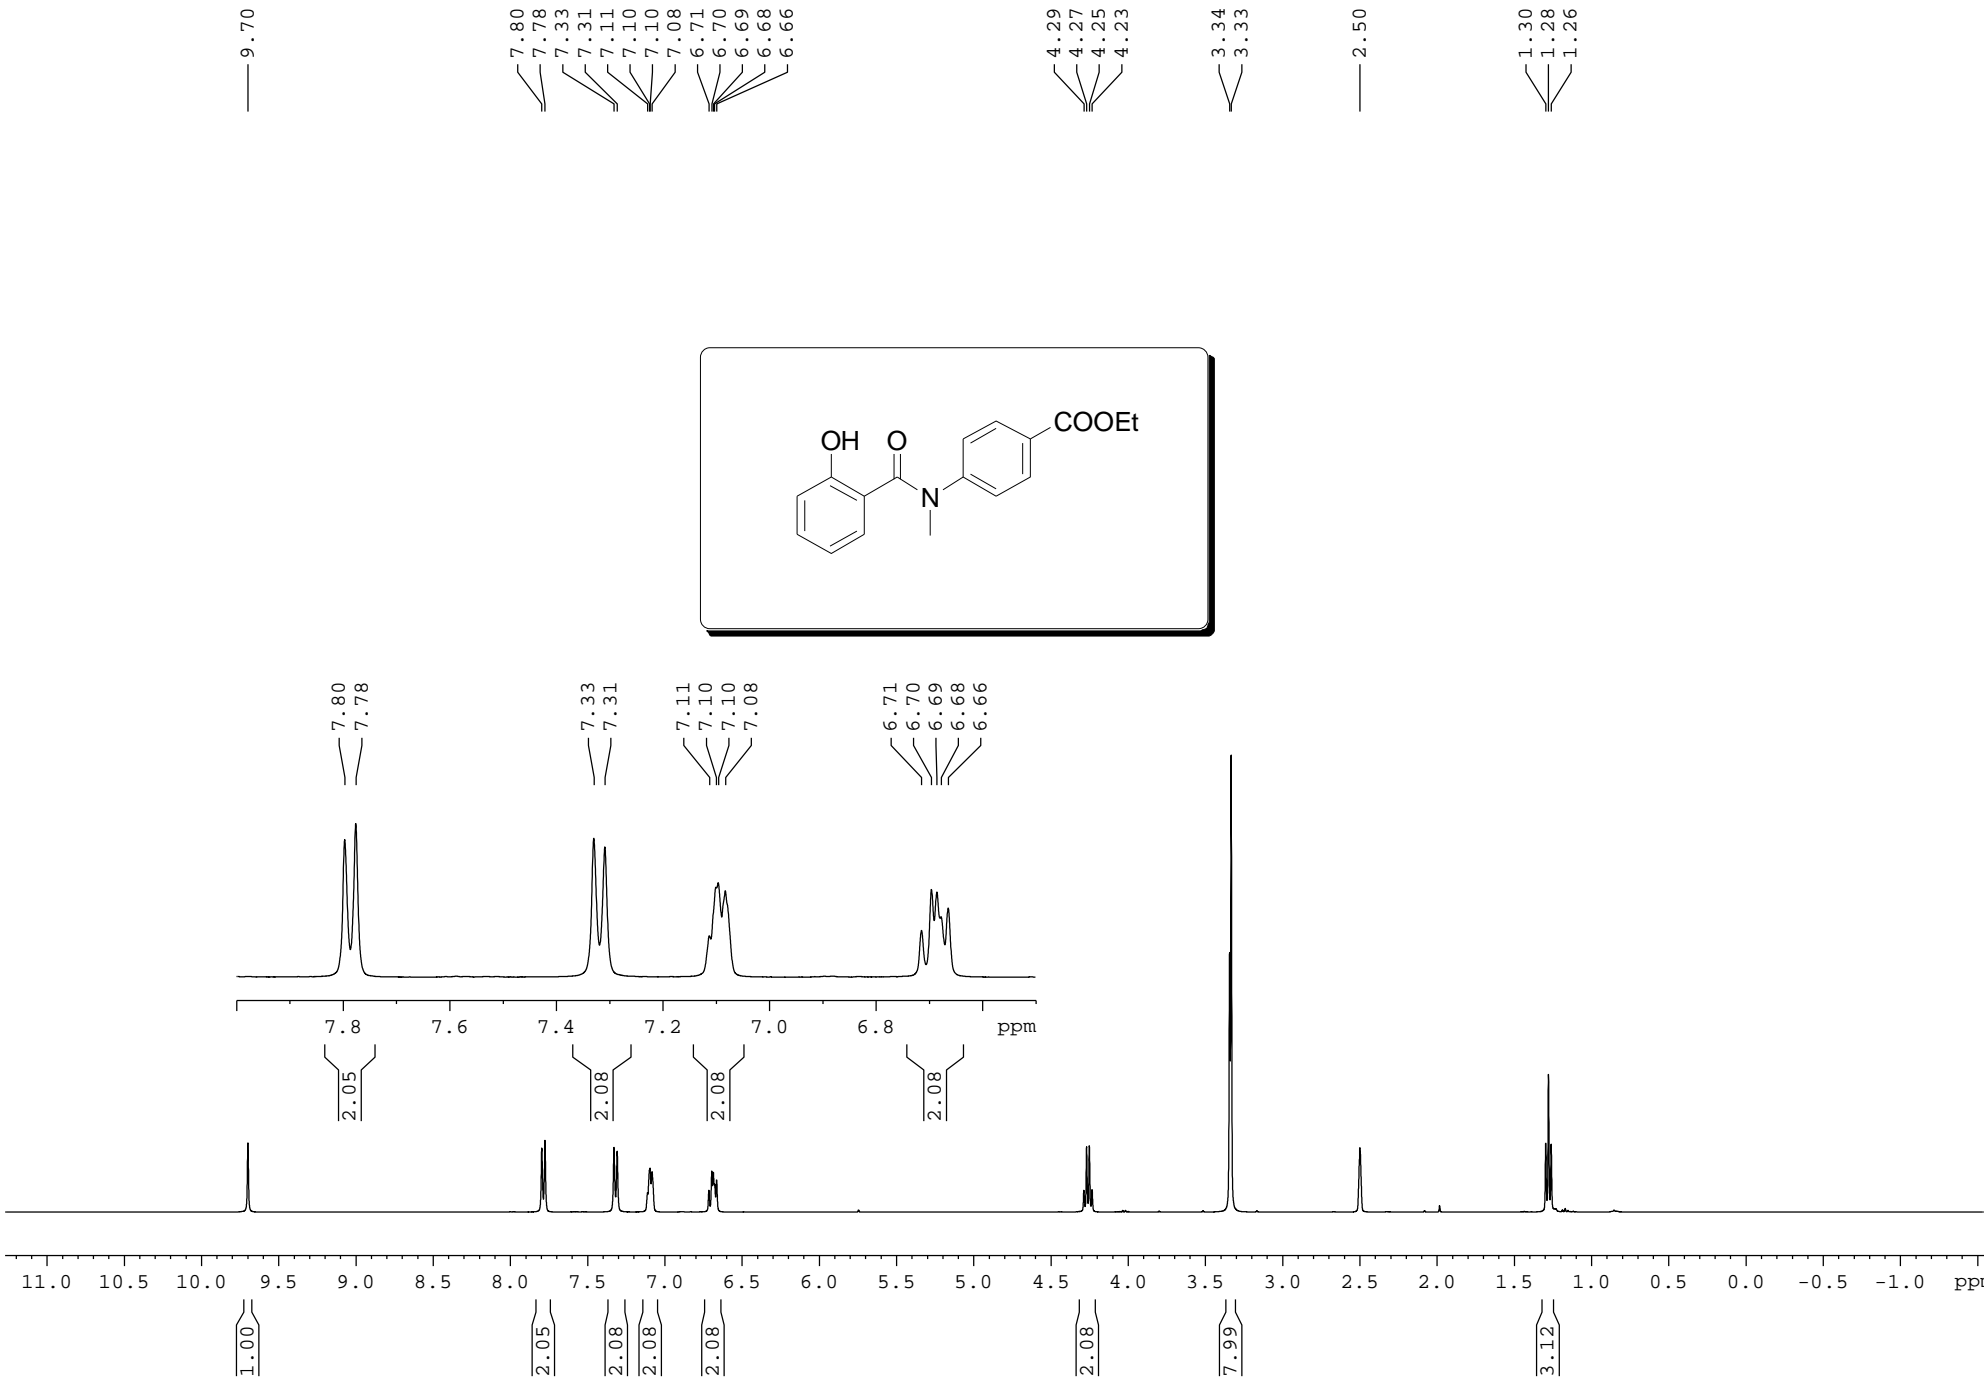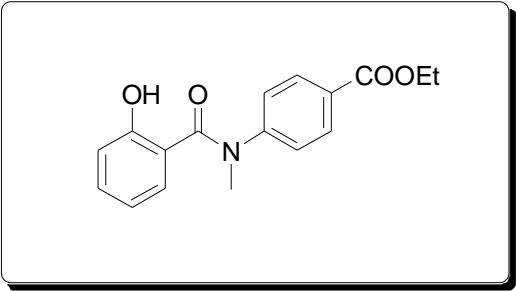

— 168.41  
— 165.09

— 153.43  
— 148.01

— 130.36  
— 129.35  
— 128.47  
— 127.06  
— 126.05  
— 124.26  
— 118.60  
— 115.61

— 60.68

— 39.52  
— 36.65

— 14.08

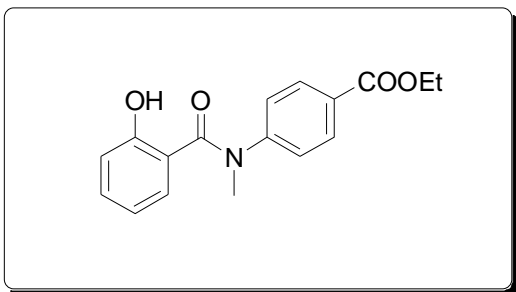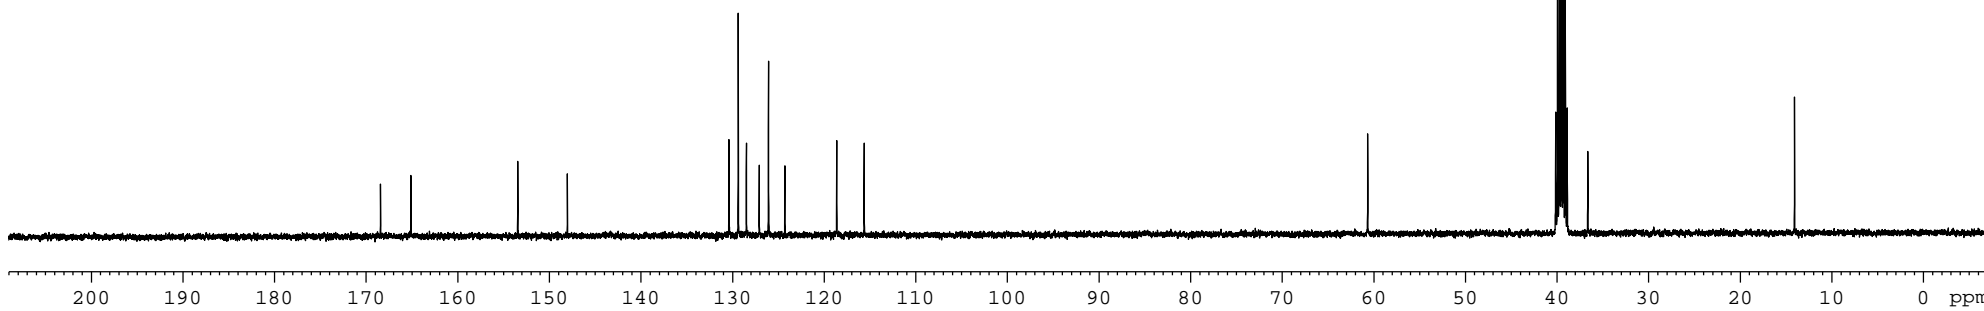

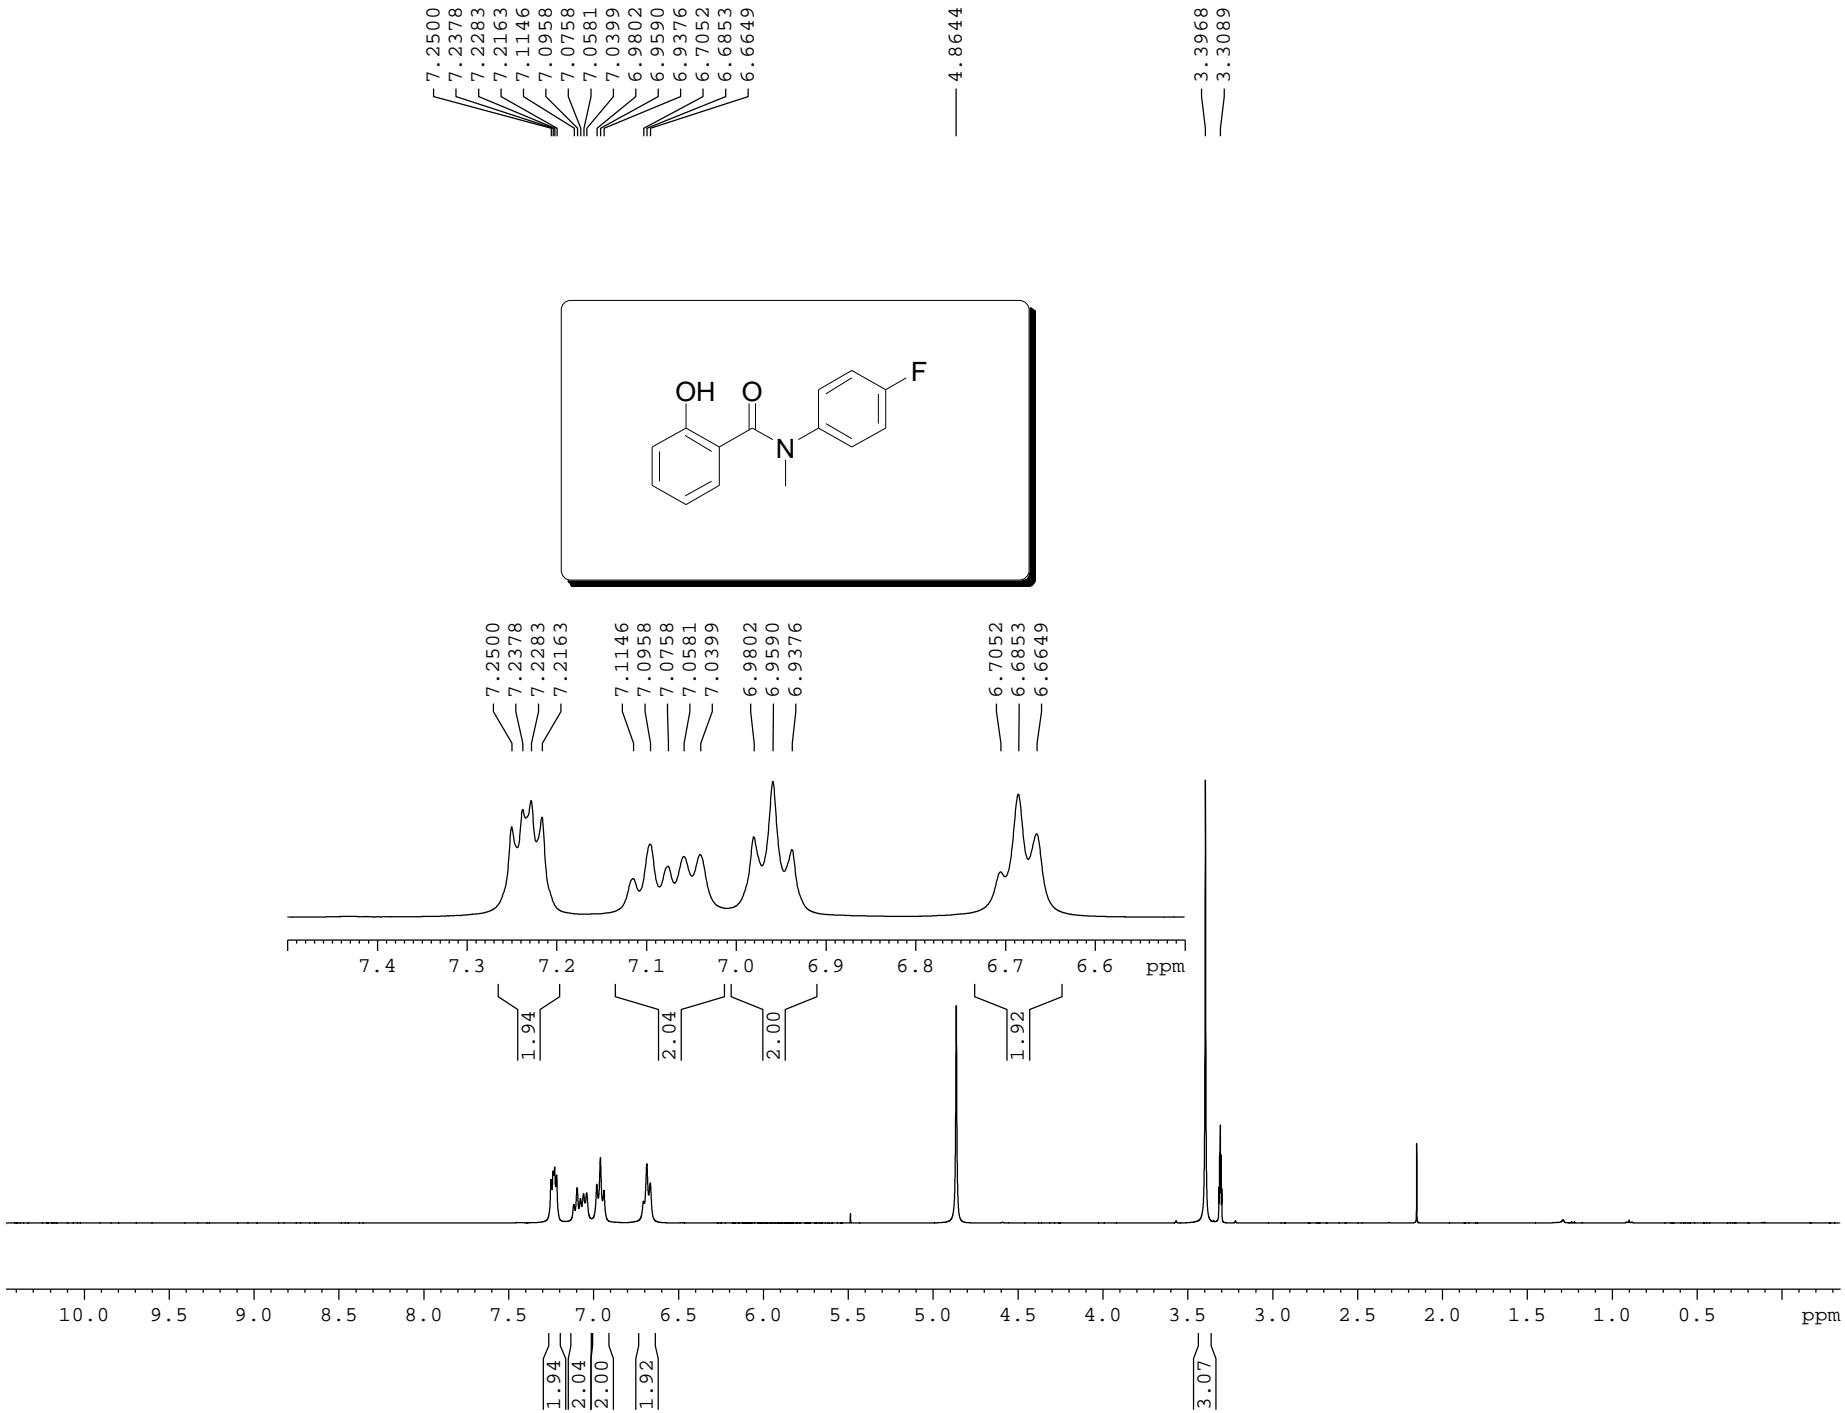

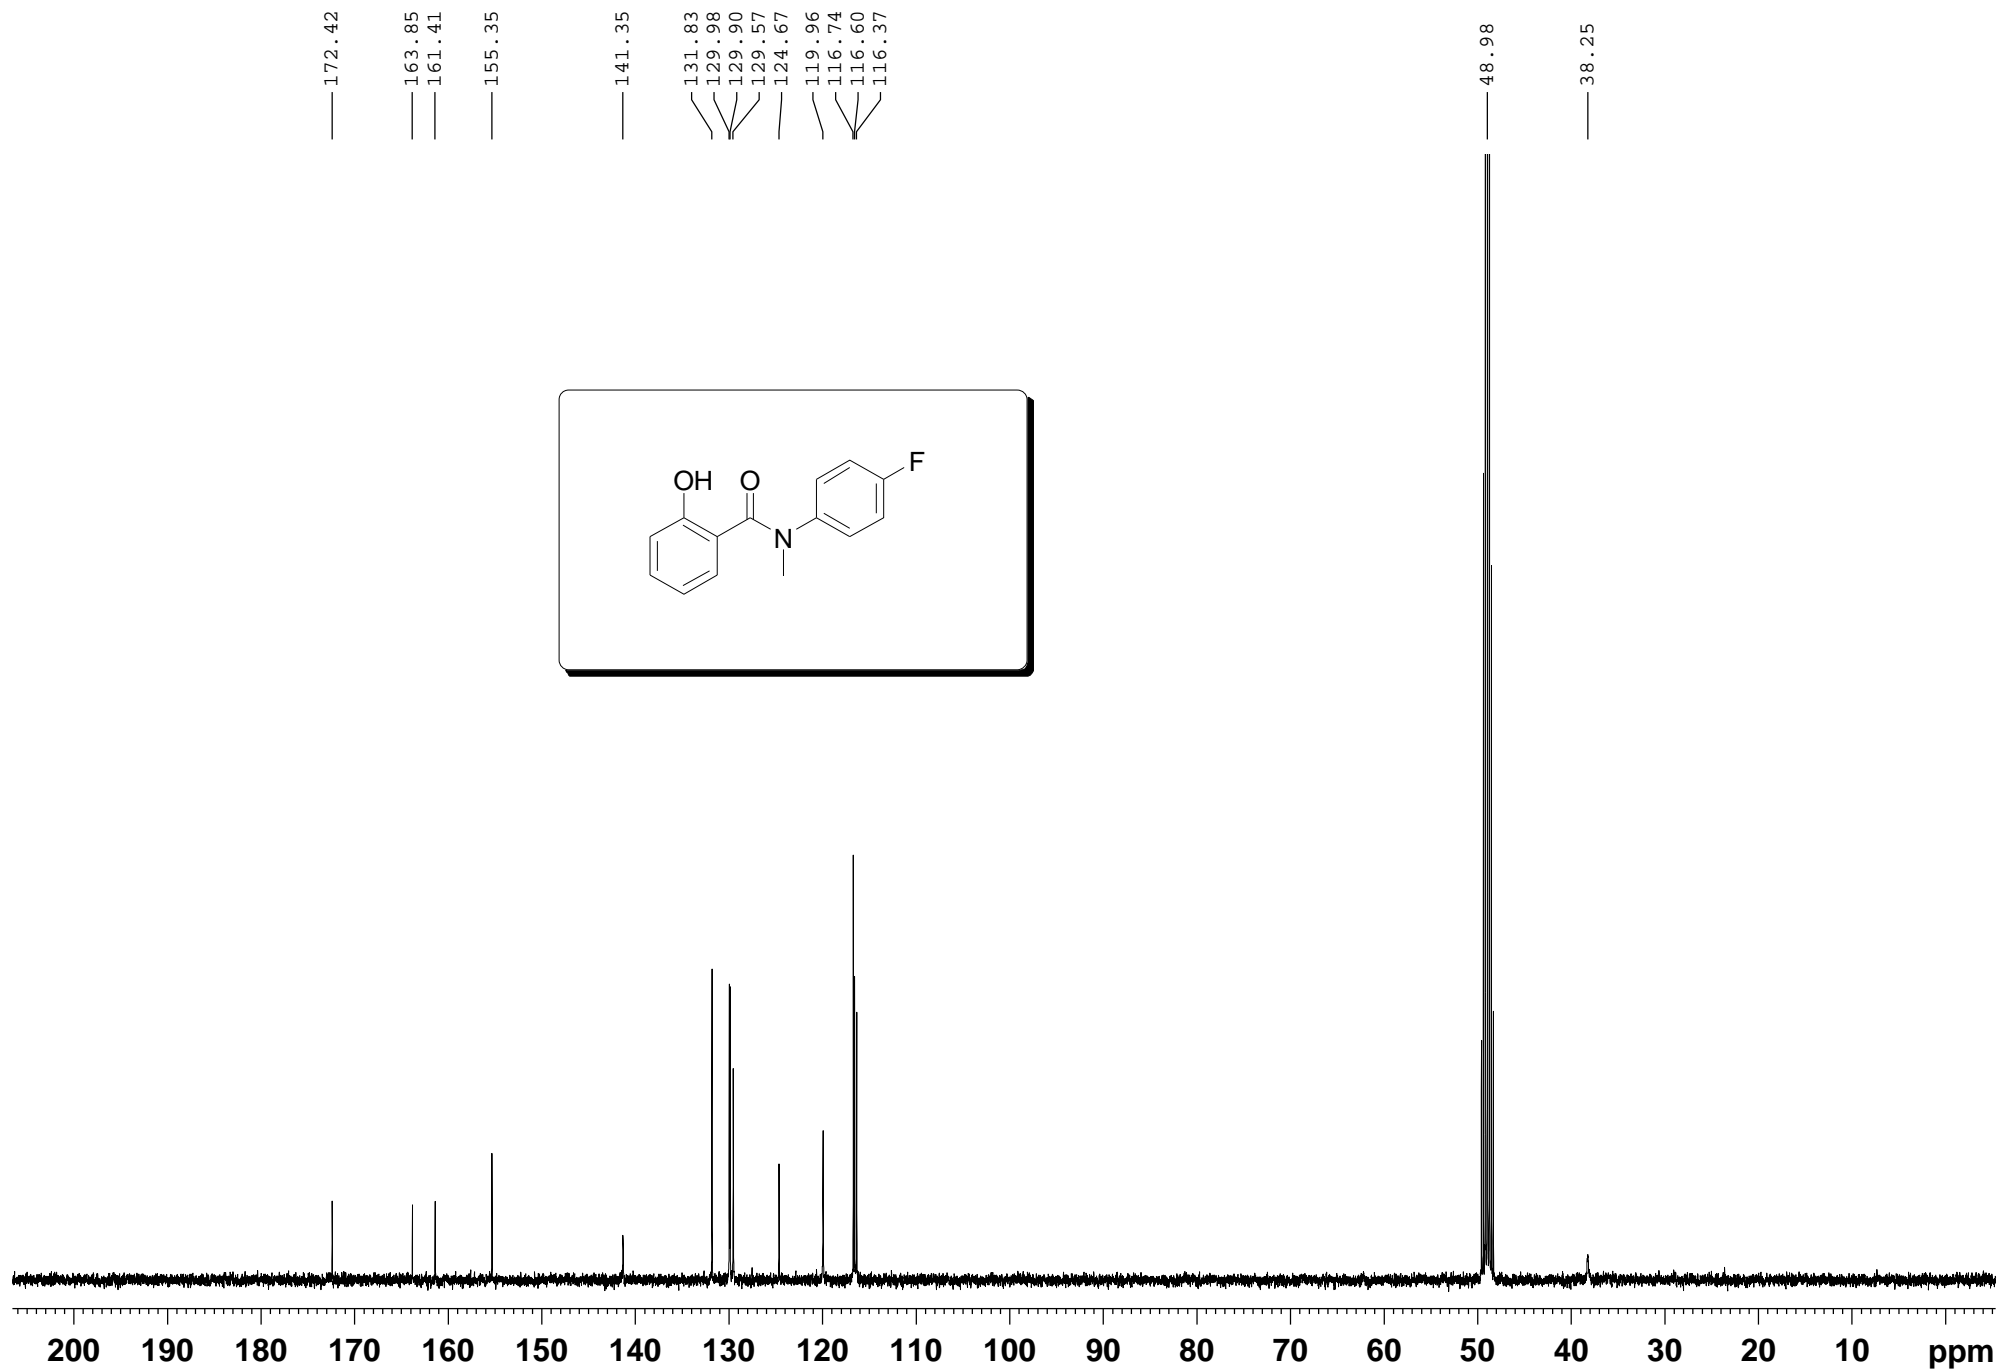

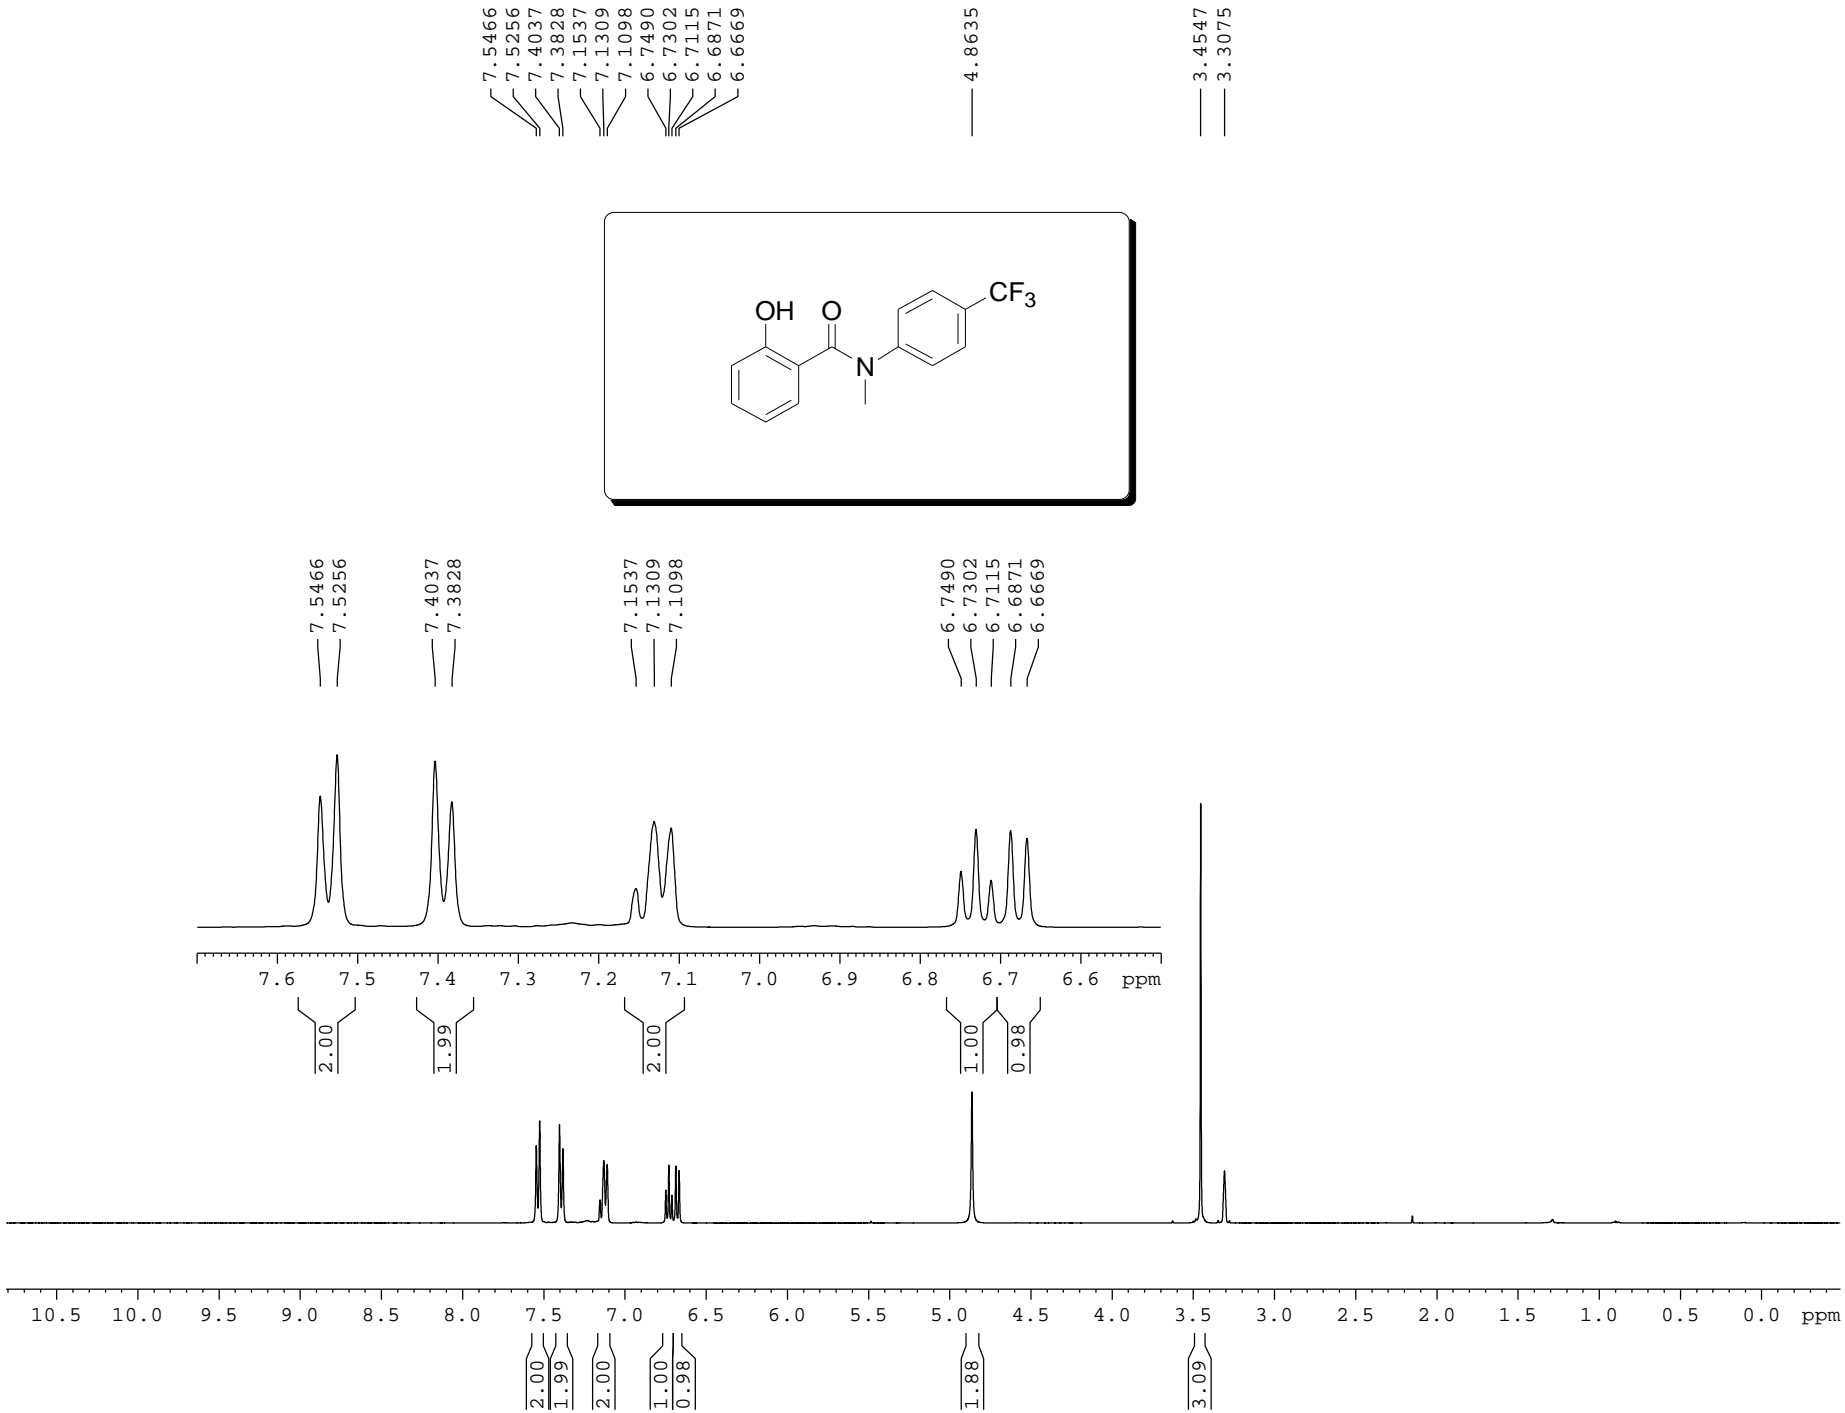

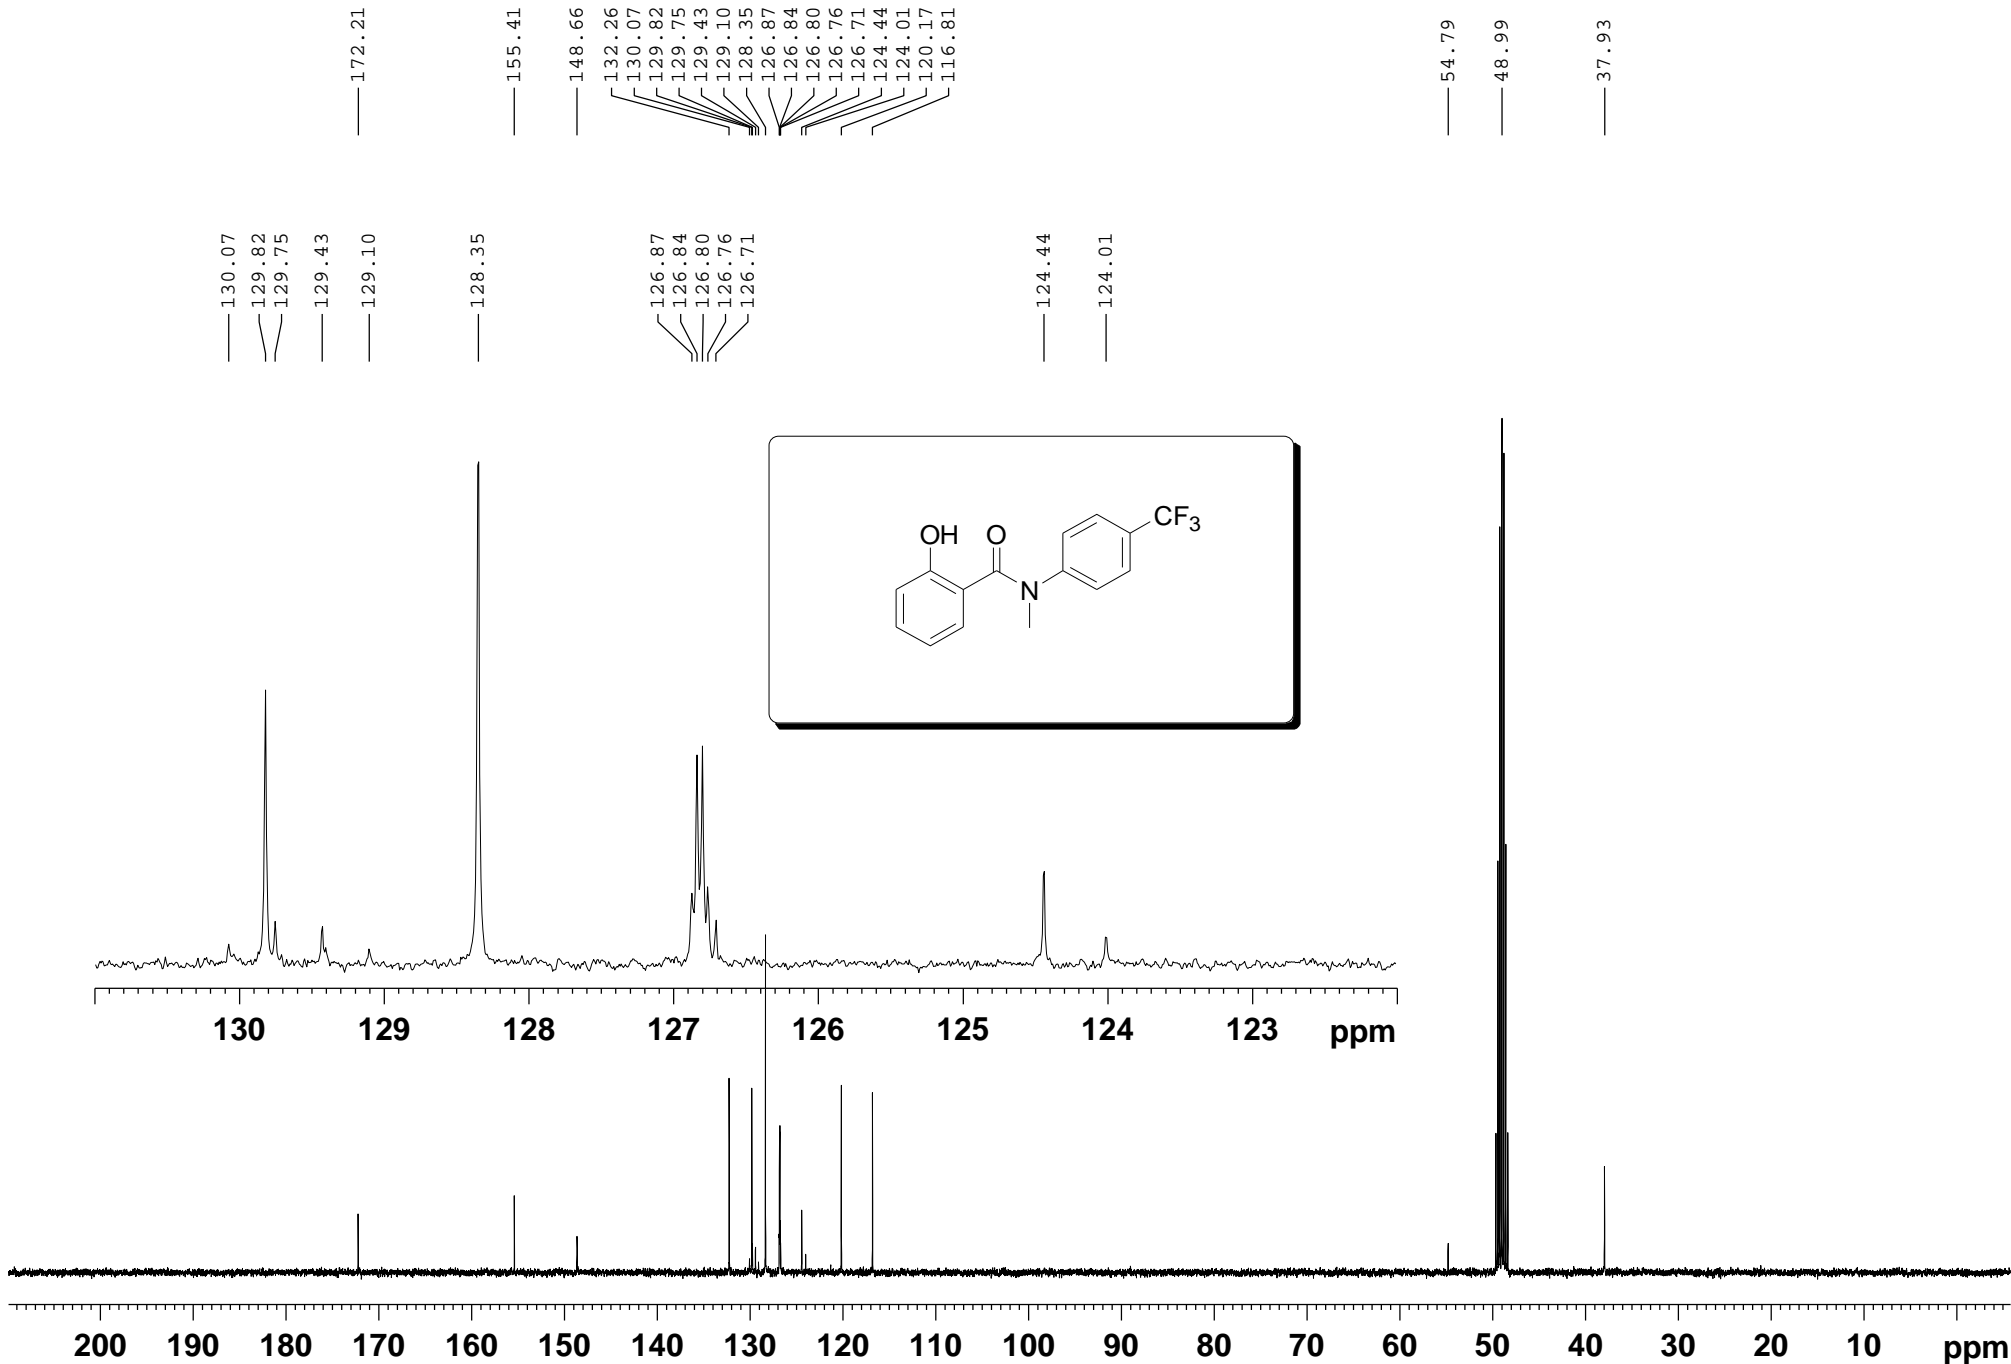



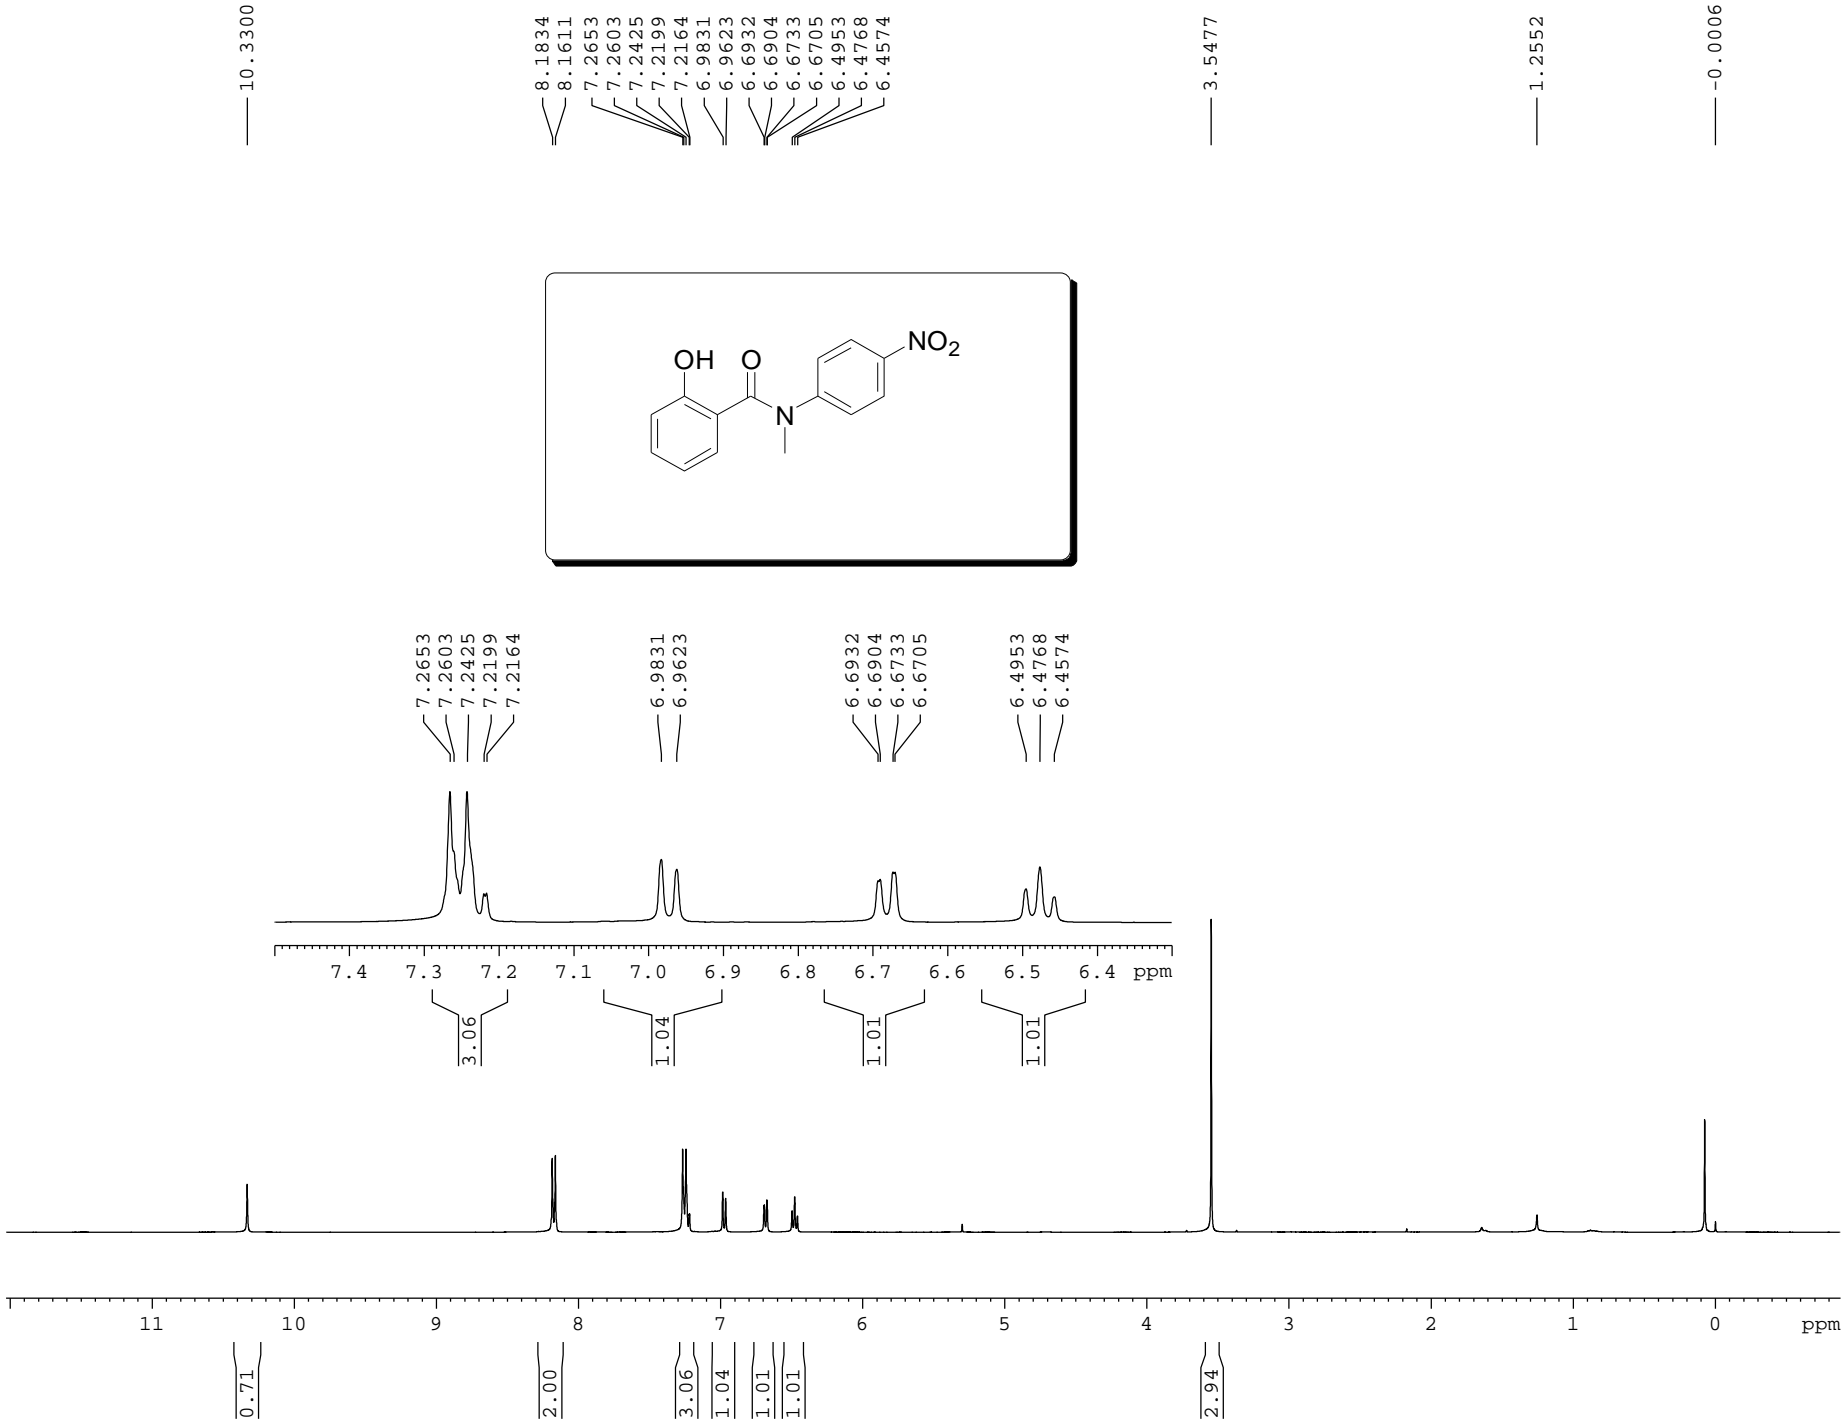

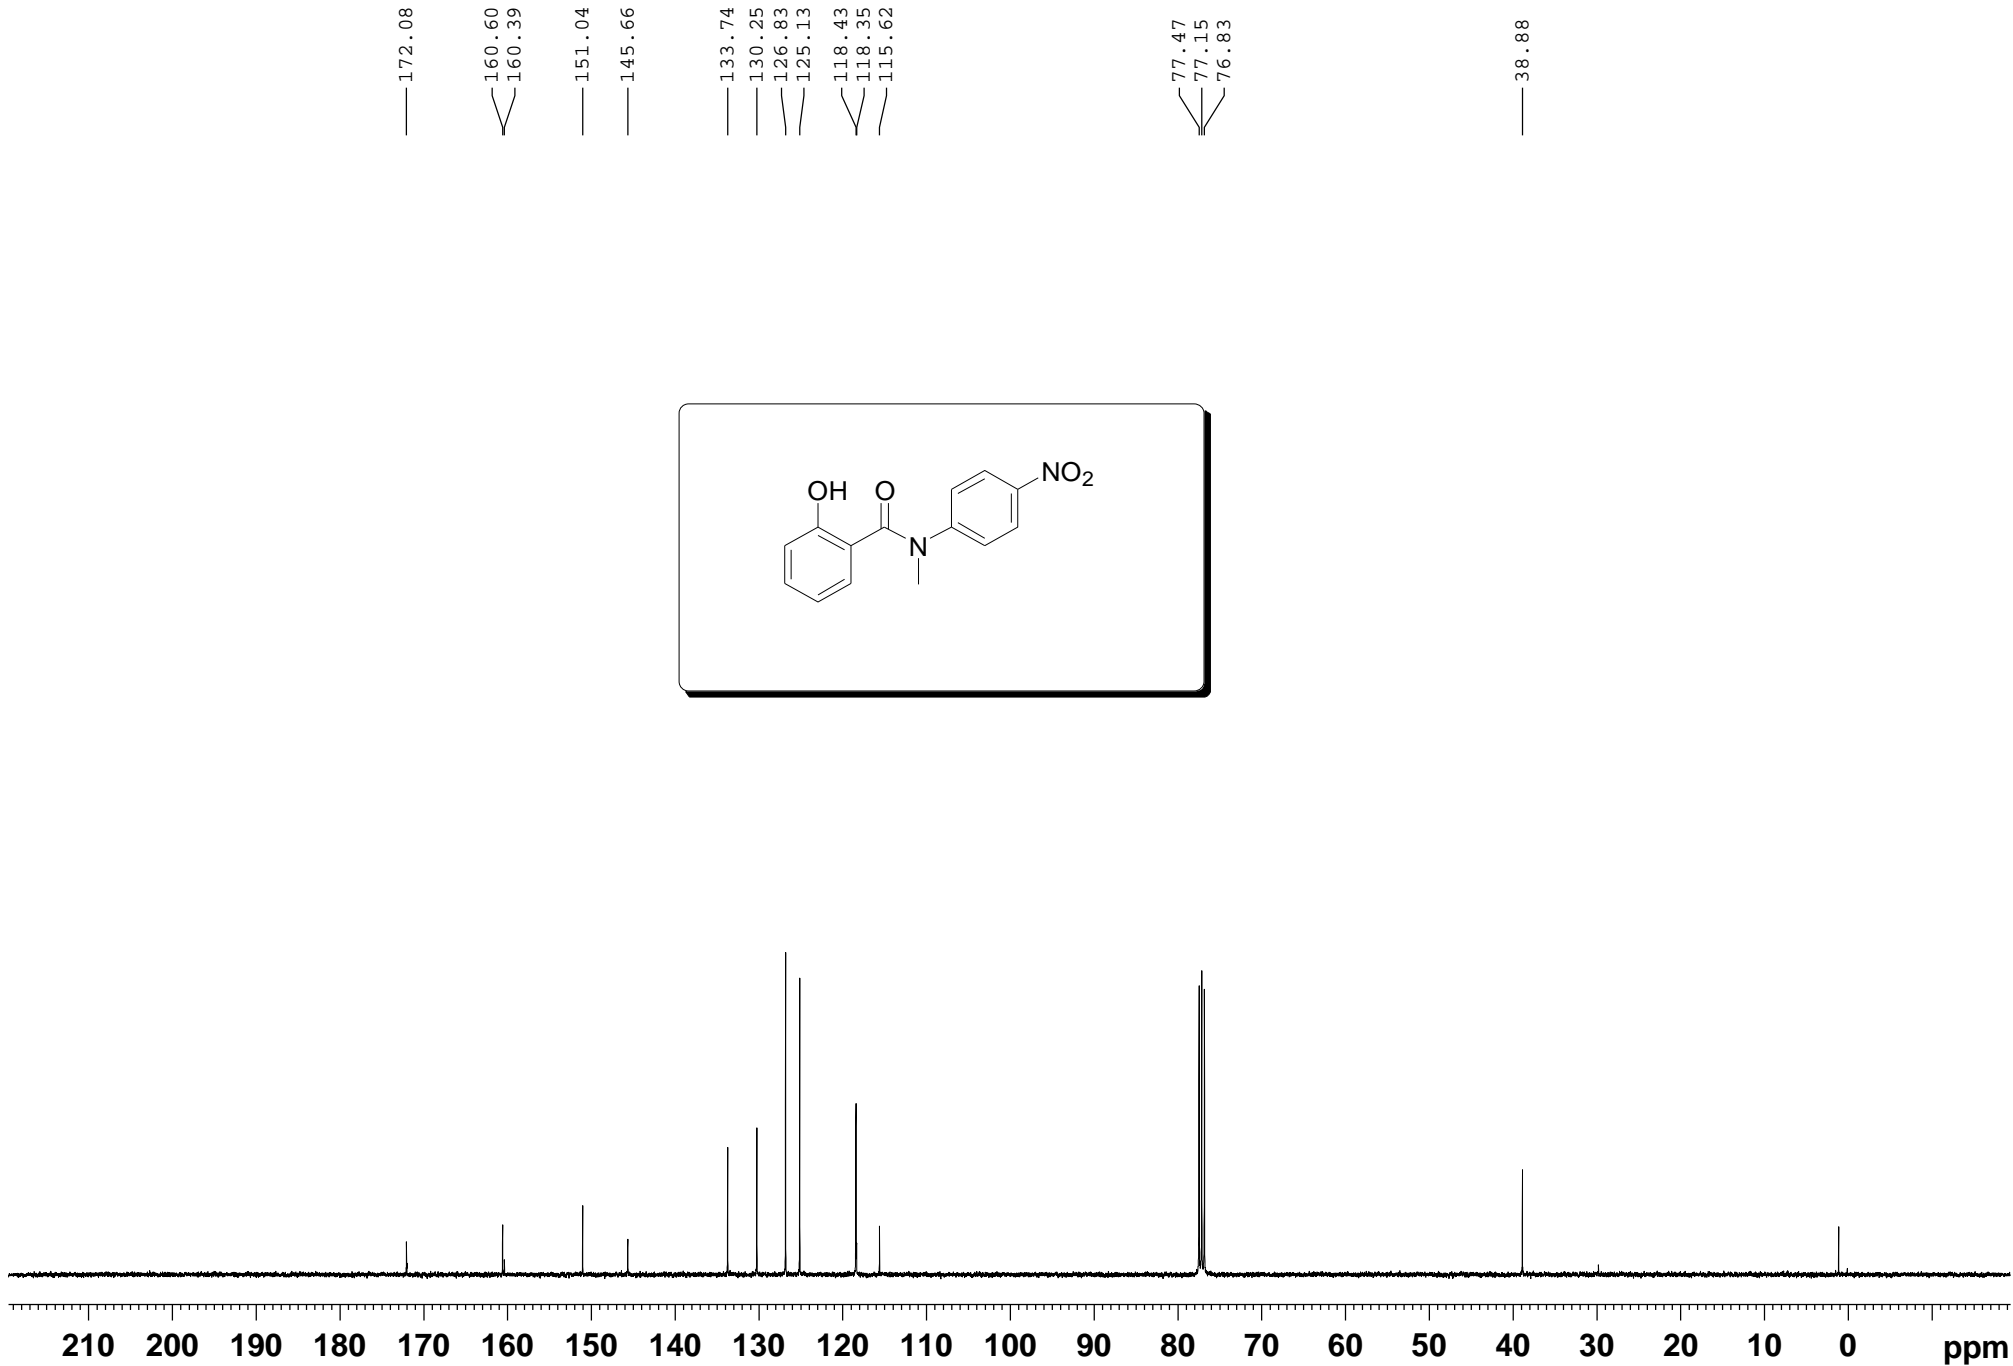

7.0582  
6.8493  
6.8298  
6.5247  
6.4435  
6.4241

4.8635

3.3815  
3.3096

2.2600  
2.1670

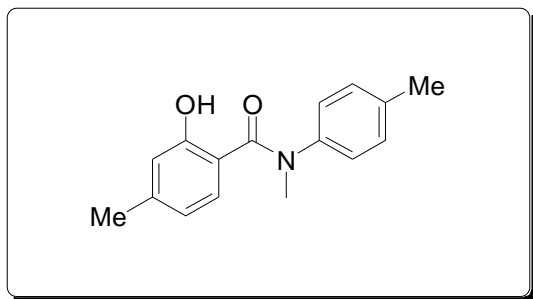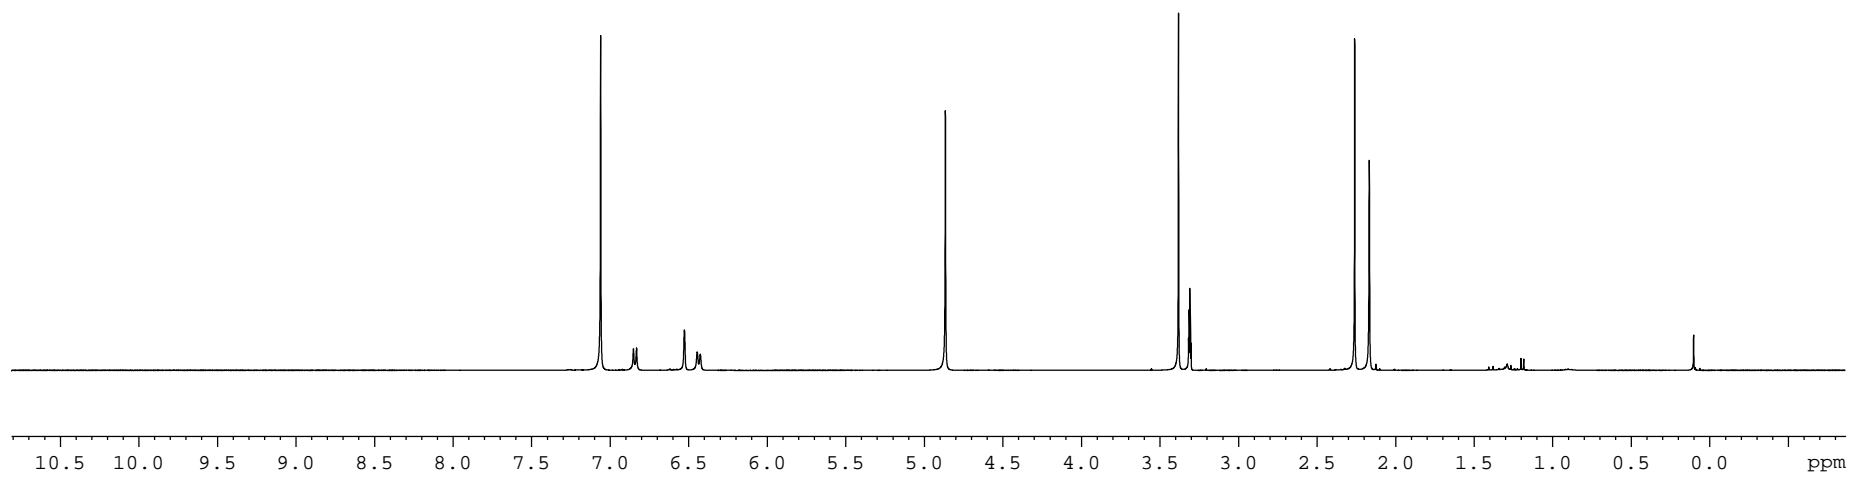

4.12  
0.99  
1.00  
1.00

3.14

3.12  
3.13

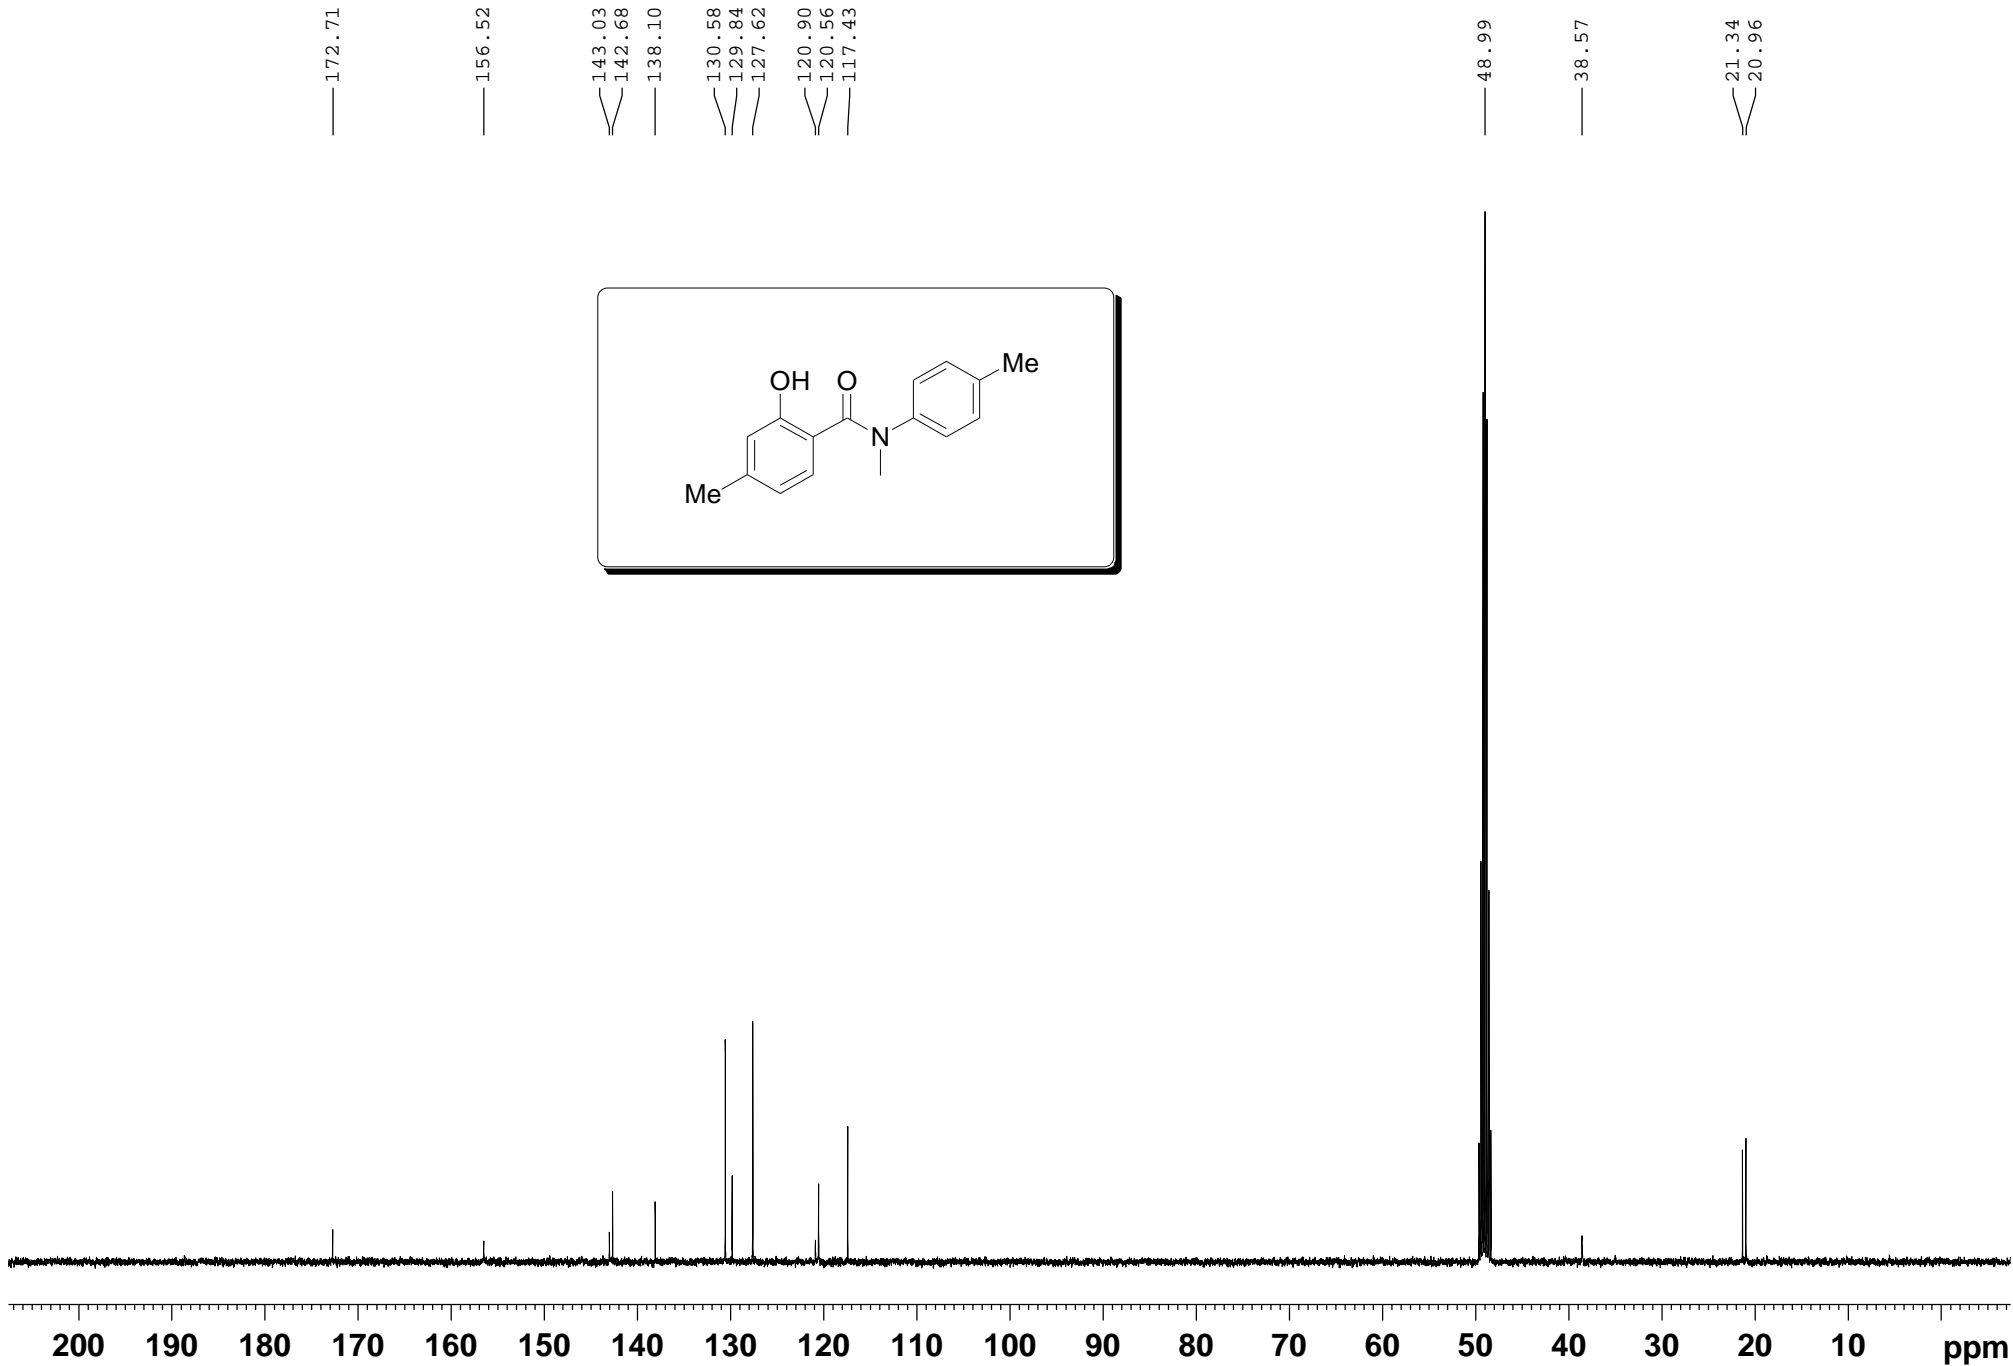

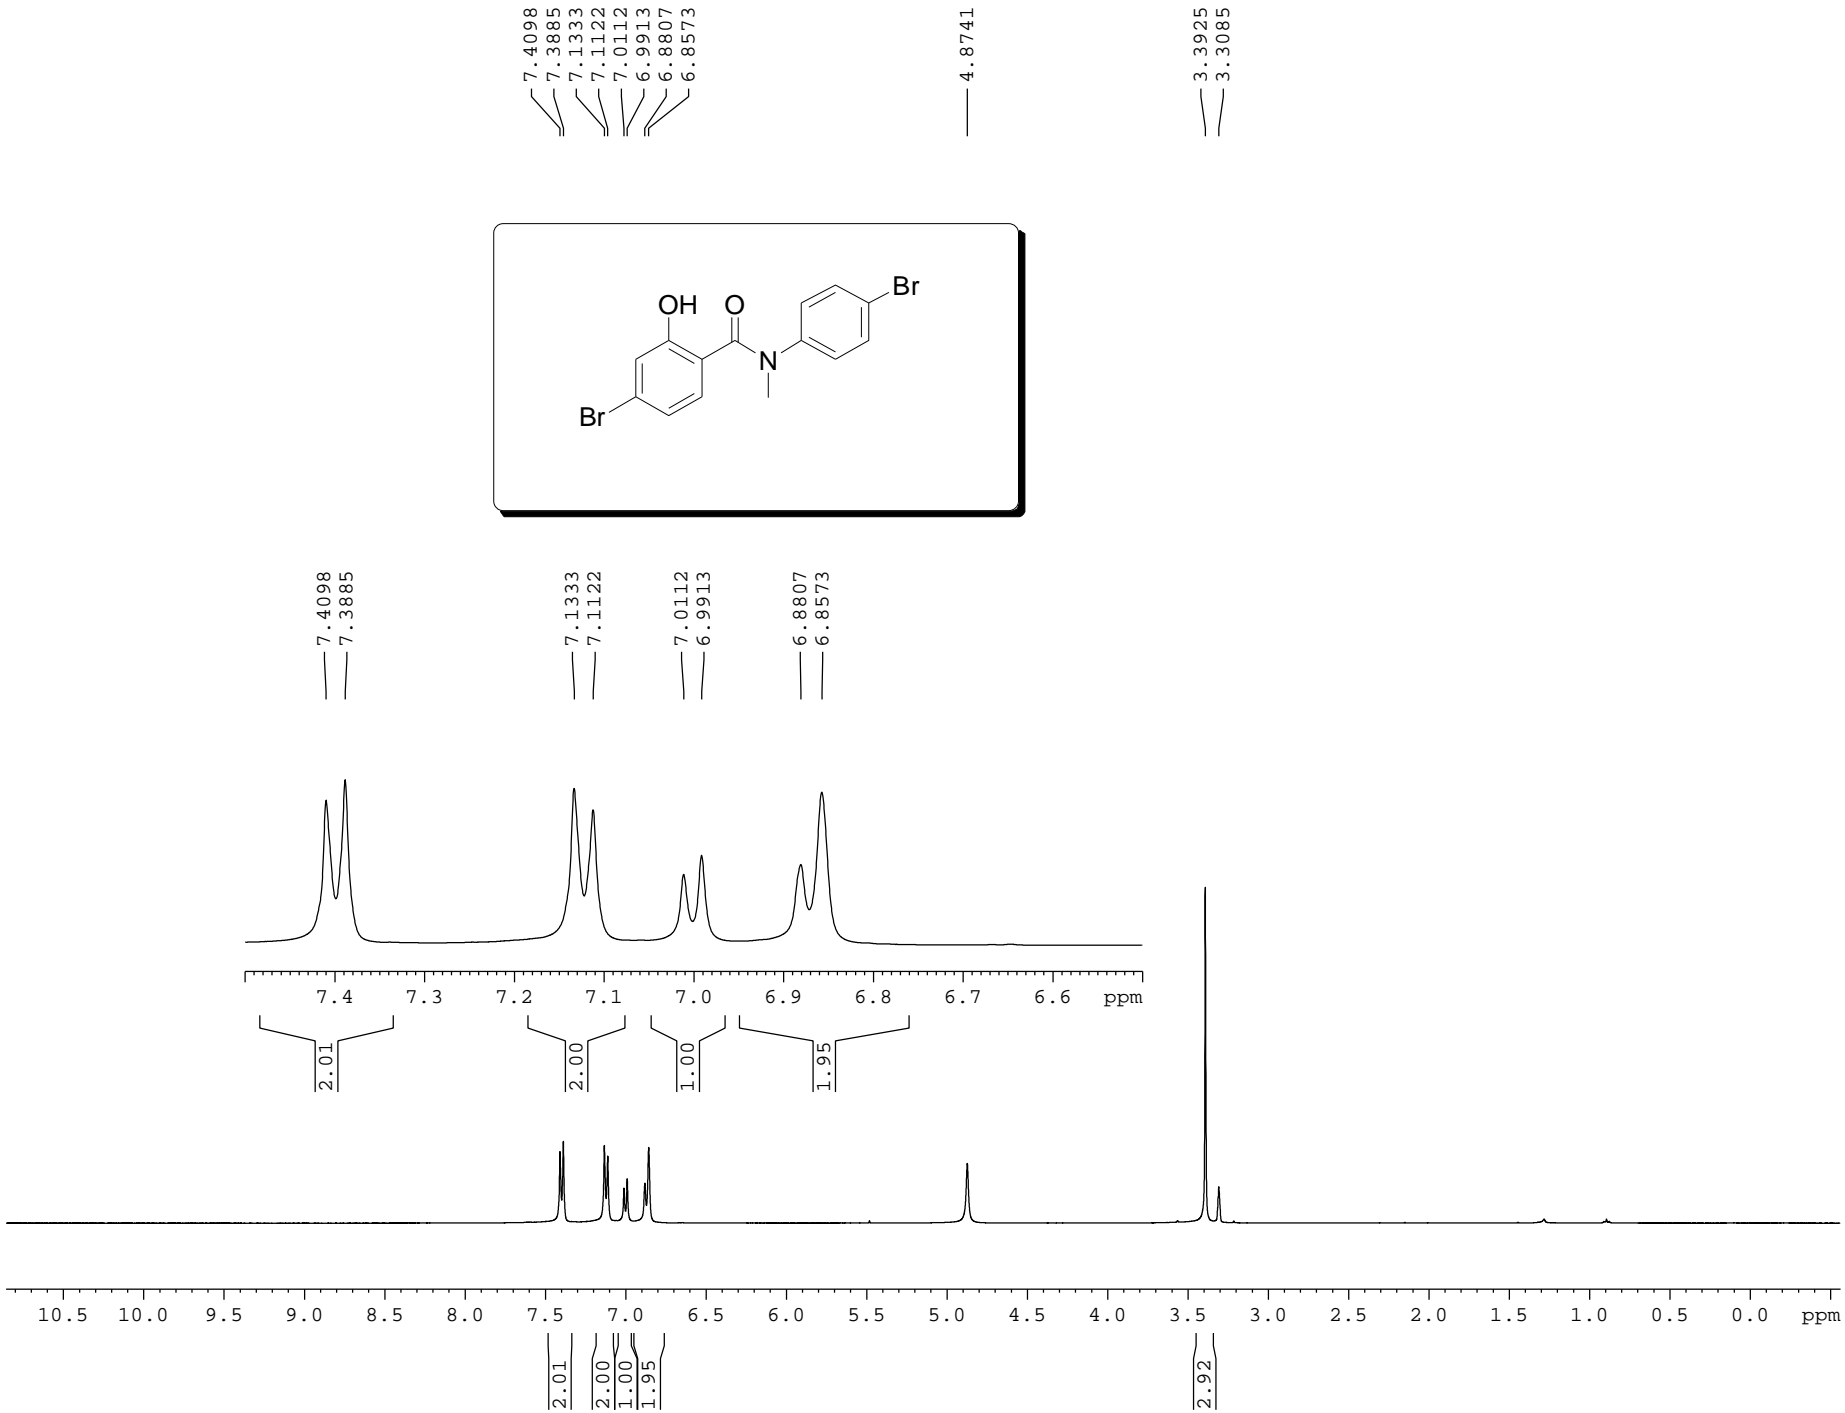

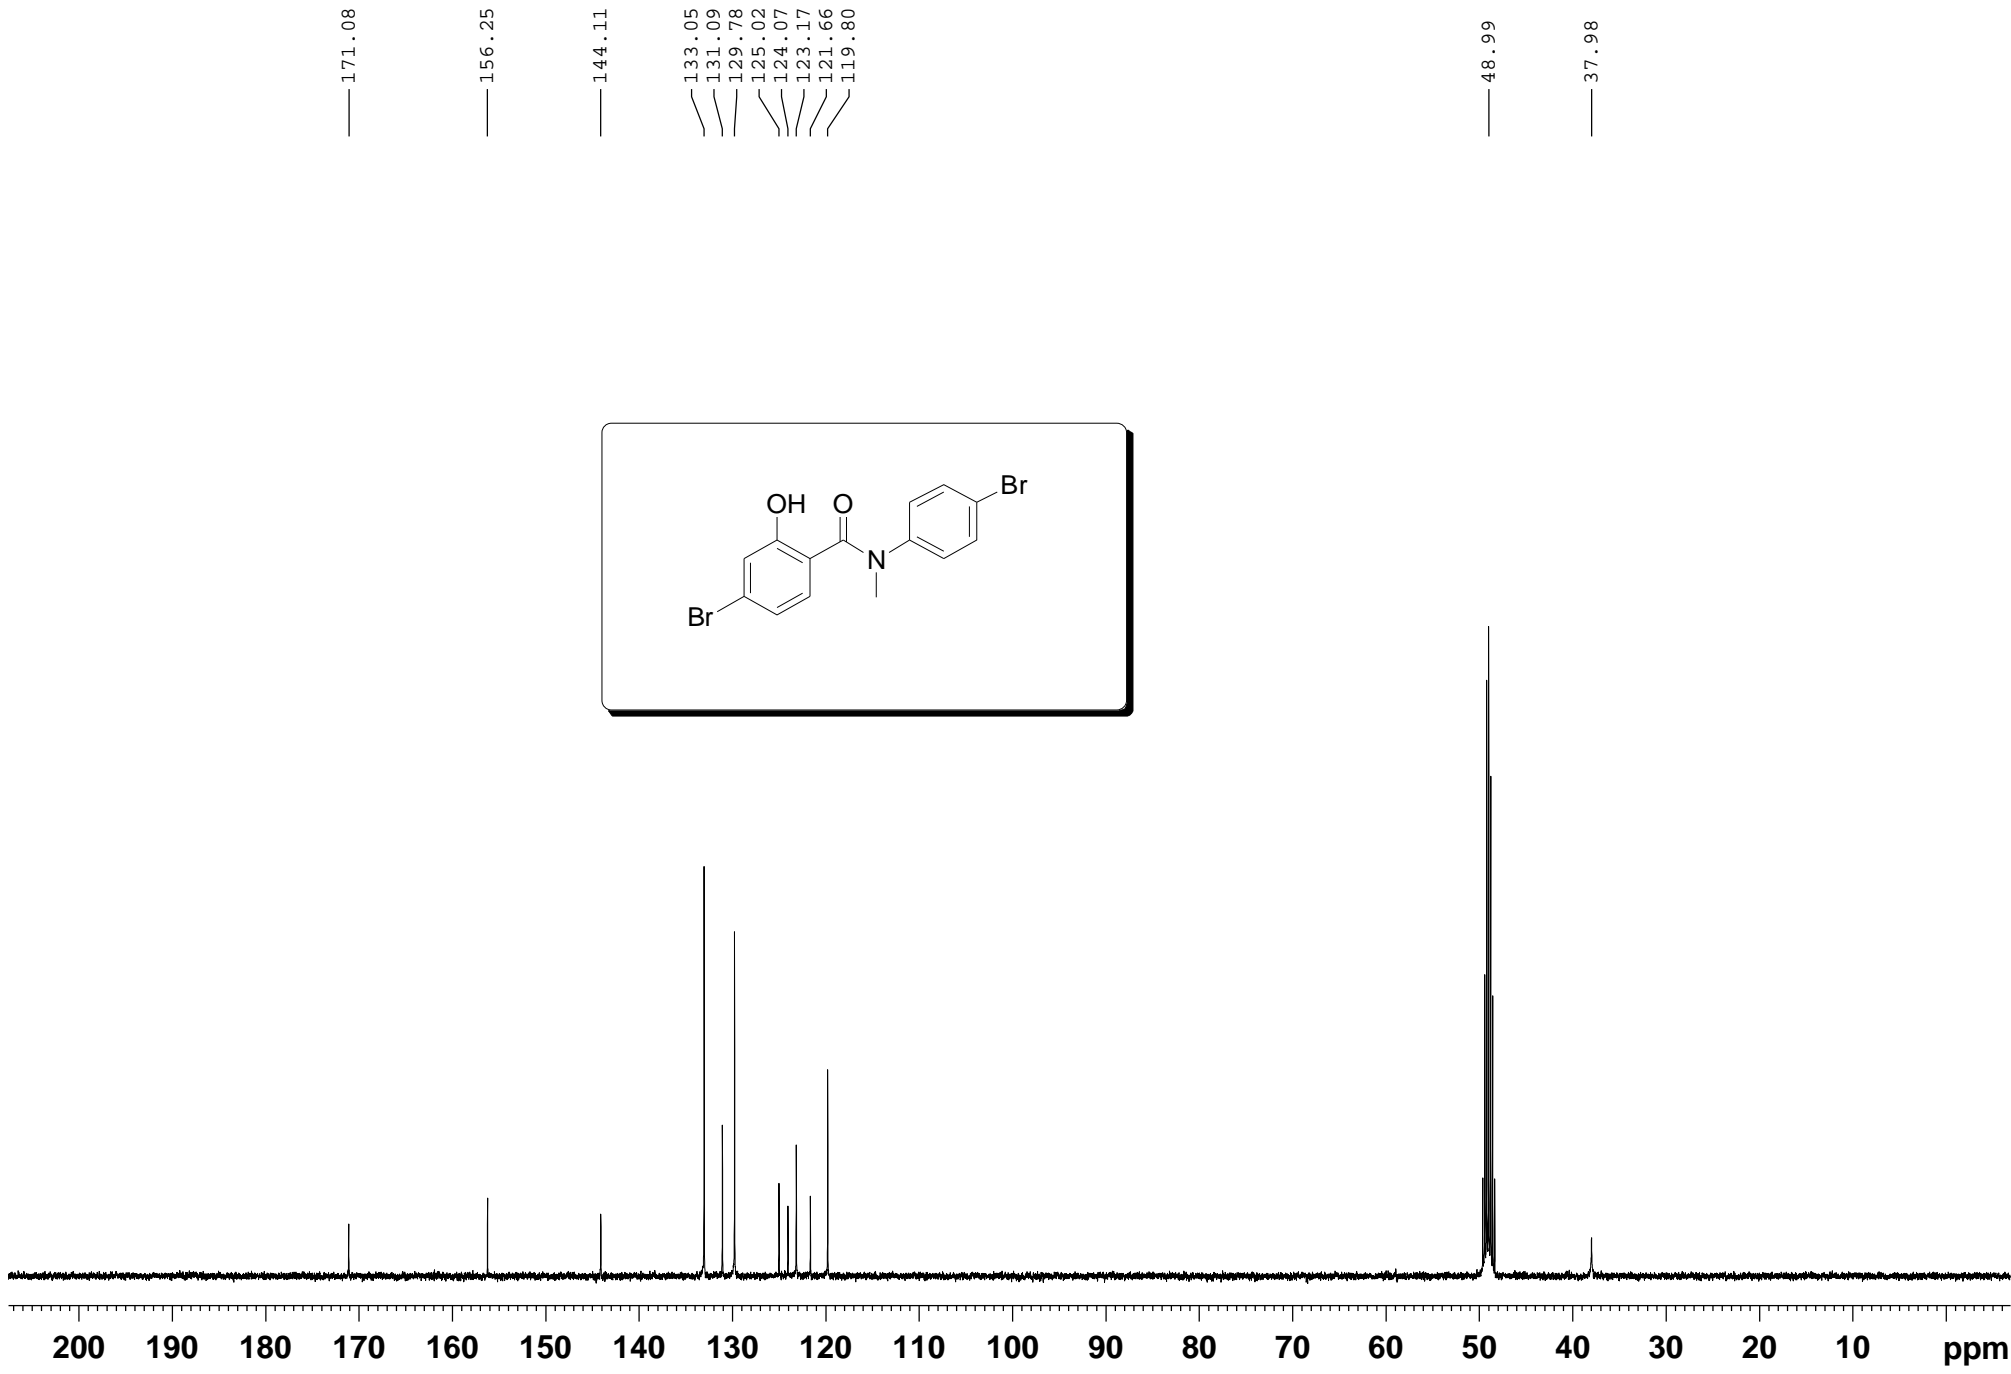

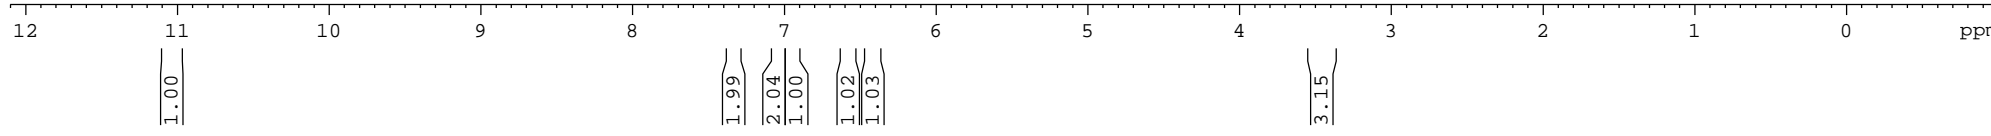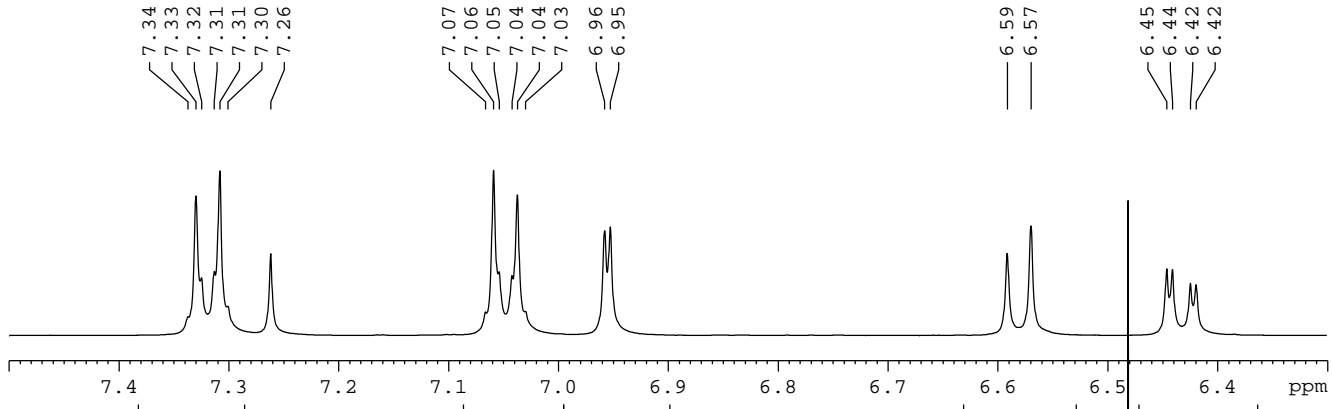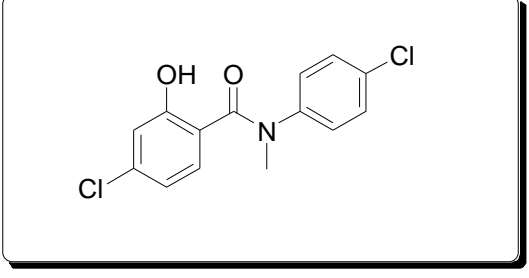

— 11.05

7.34  
7.33  
7.32  
7.31  
7.30  
7.26  
7.07  
7.06  
7.05  
7.04  
7.04  
7.03  
6.96  
6.95  
6.59  
6.57  
6.45  
6.44  
6.42  
6.42

— 3.45

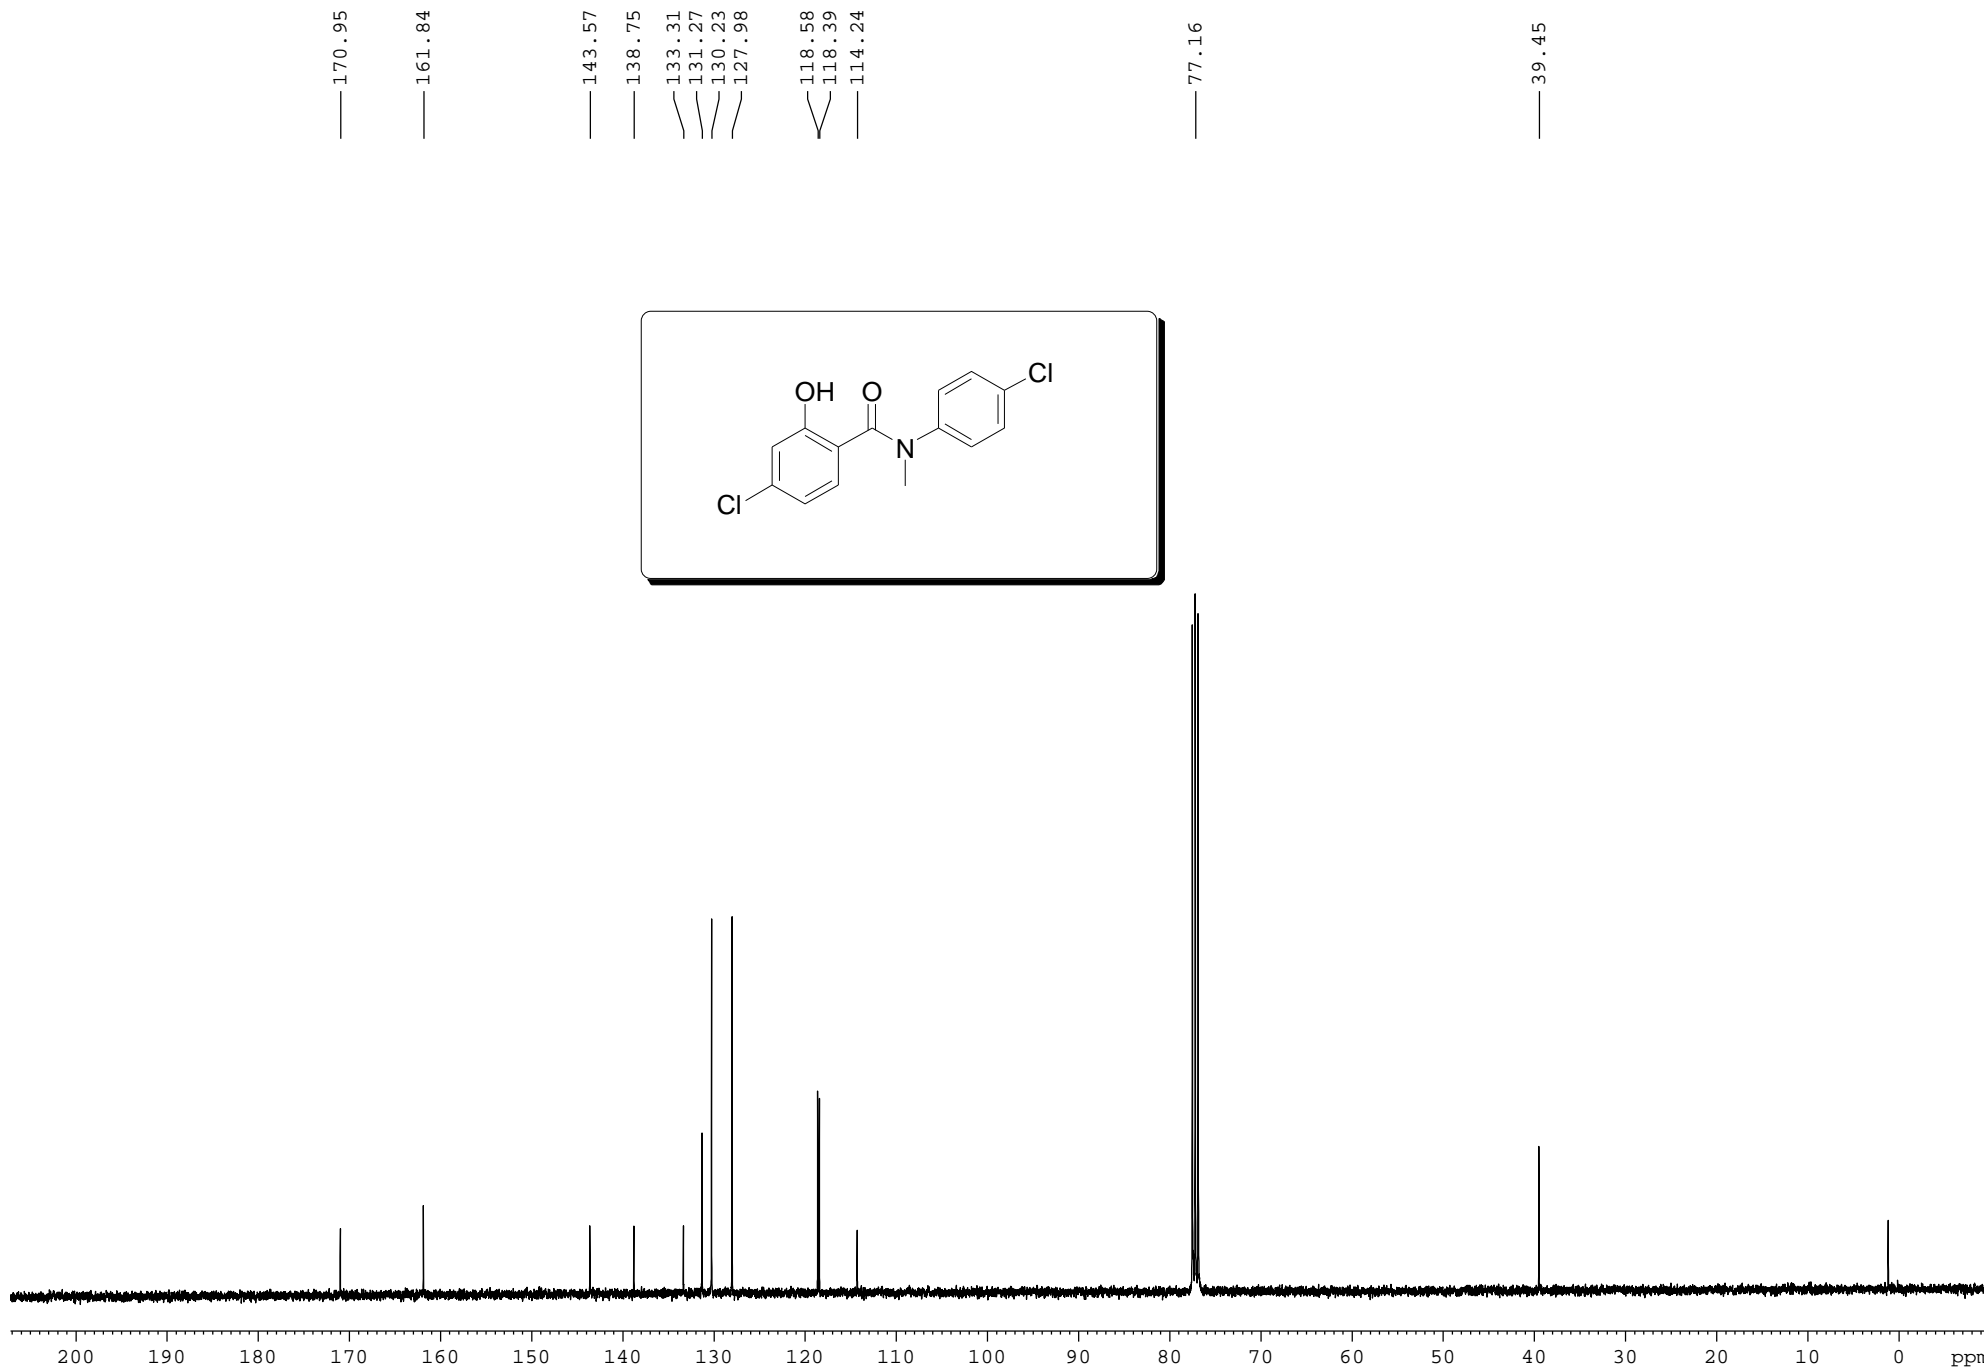



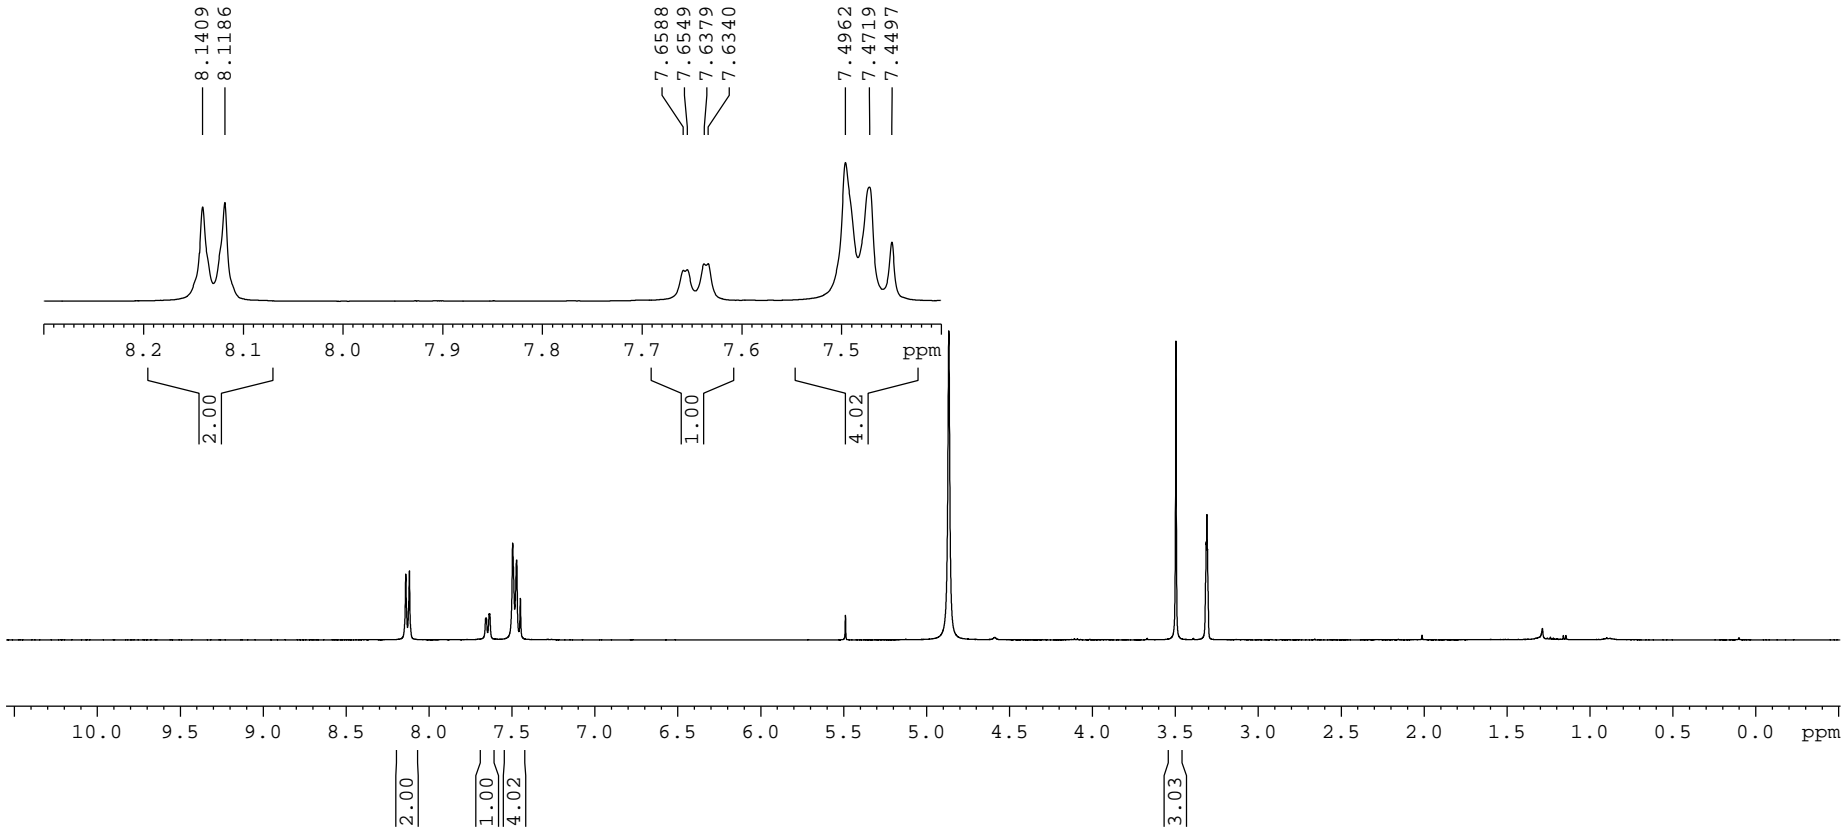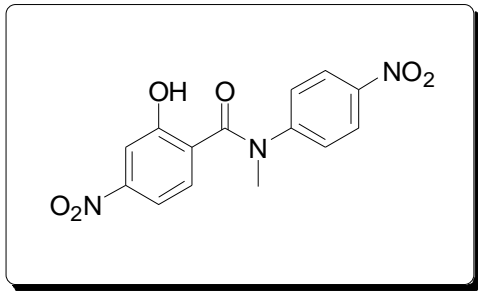

8.1409  
 8.1186  
 7.6588  
 7.6549  
 7.6379  
 7.6340  
 7.4962  
 7.4719  
 7.4497

4.8662

3.4967  
3.3102

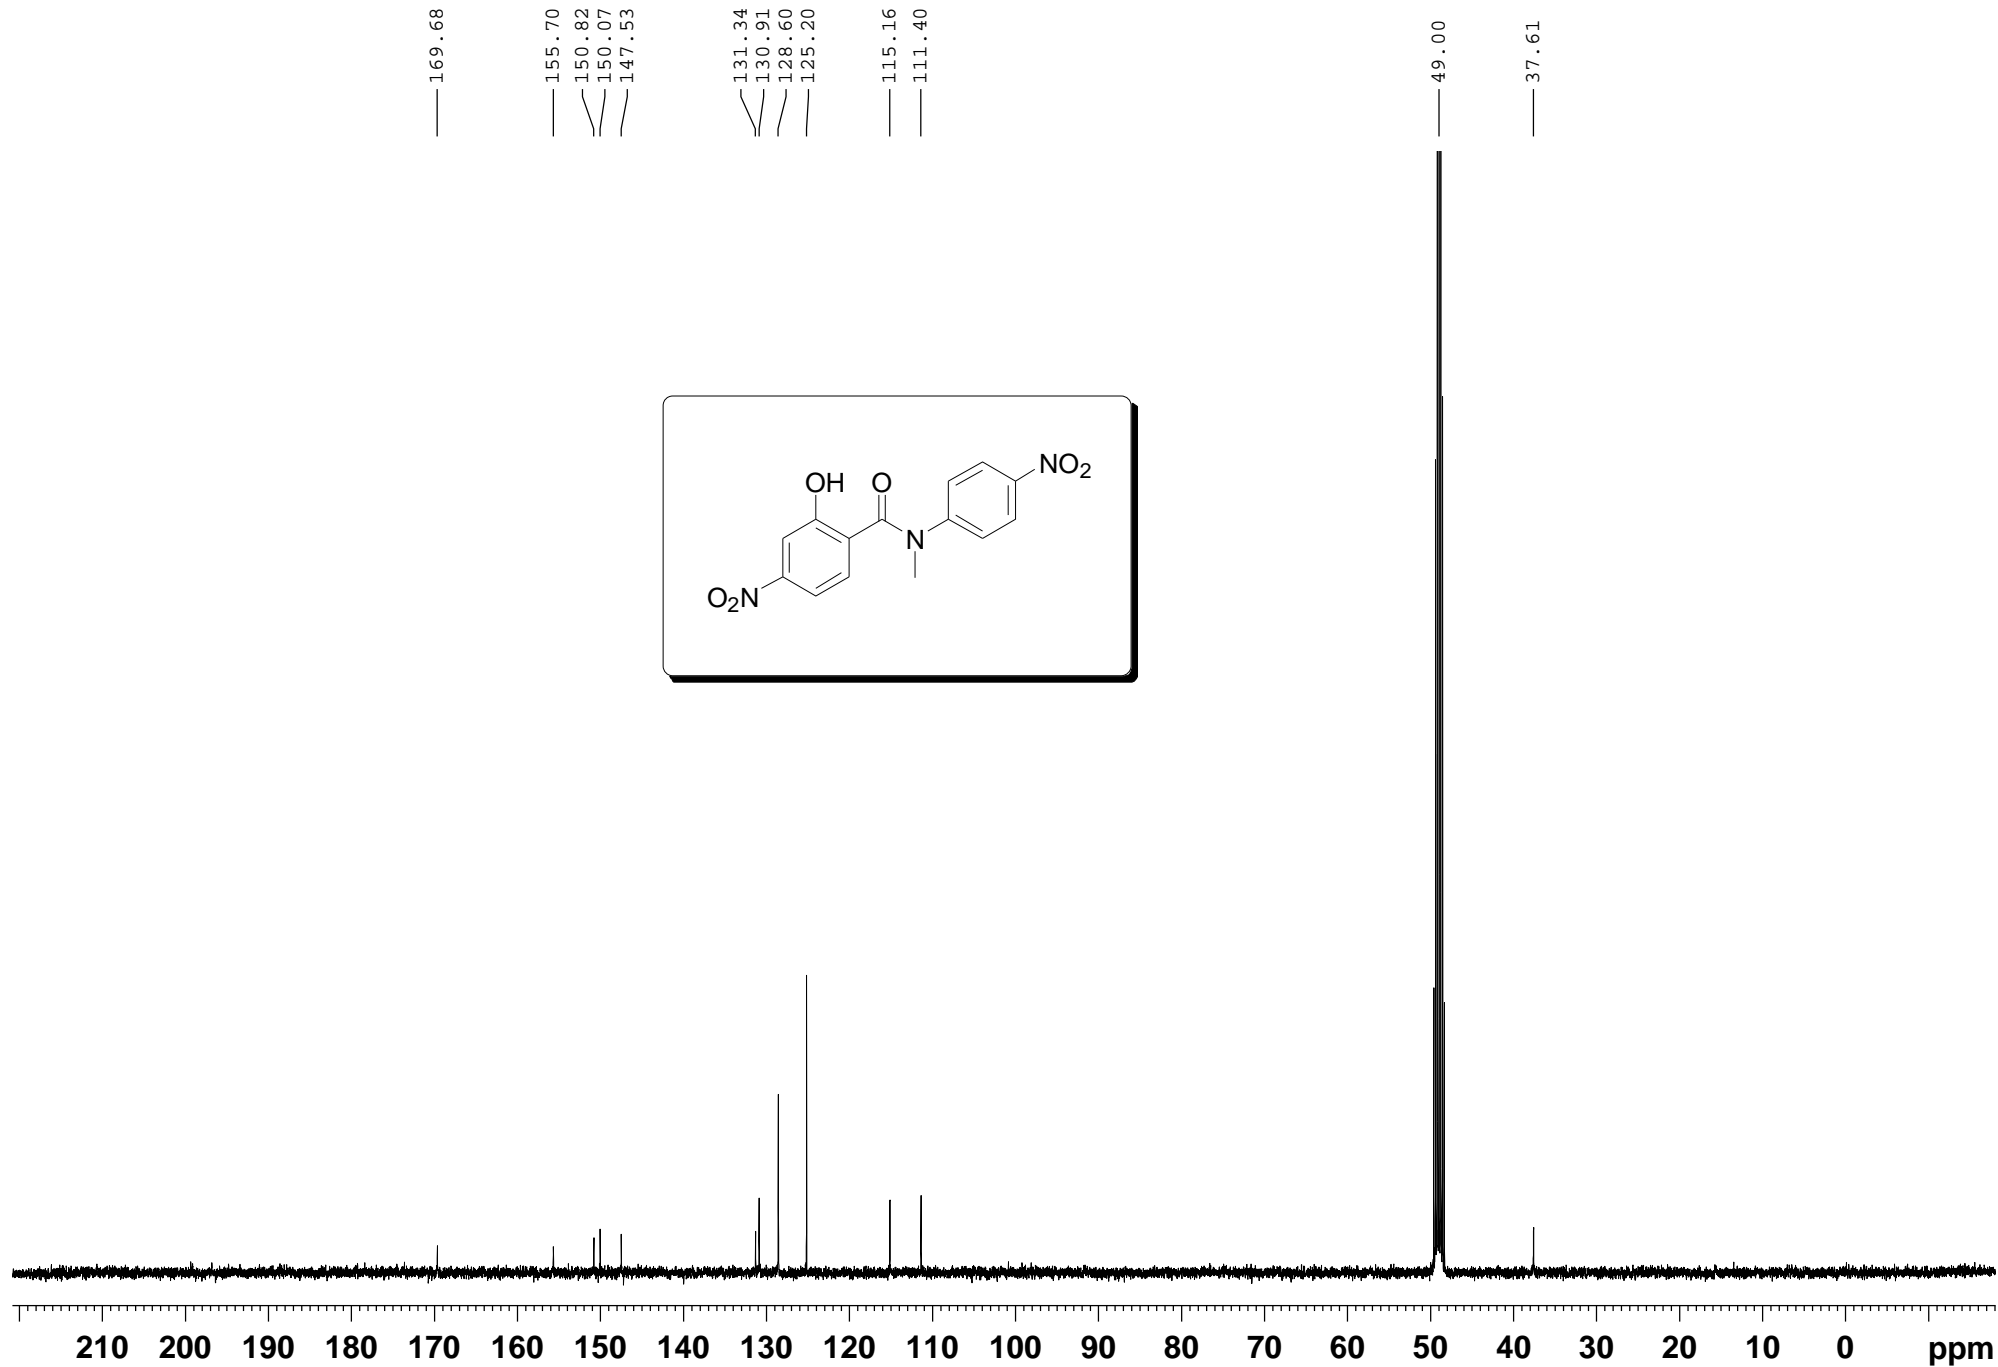

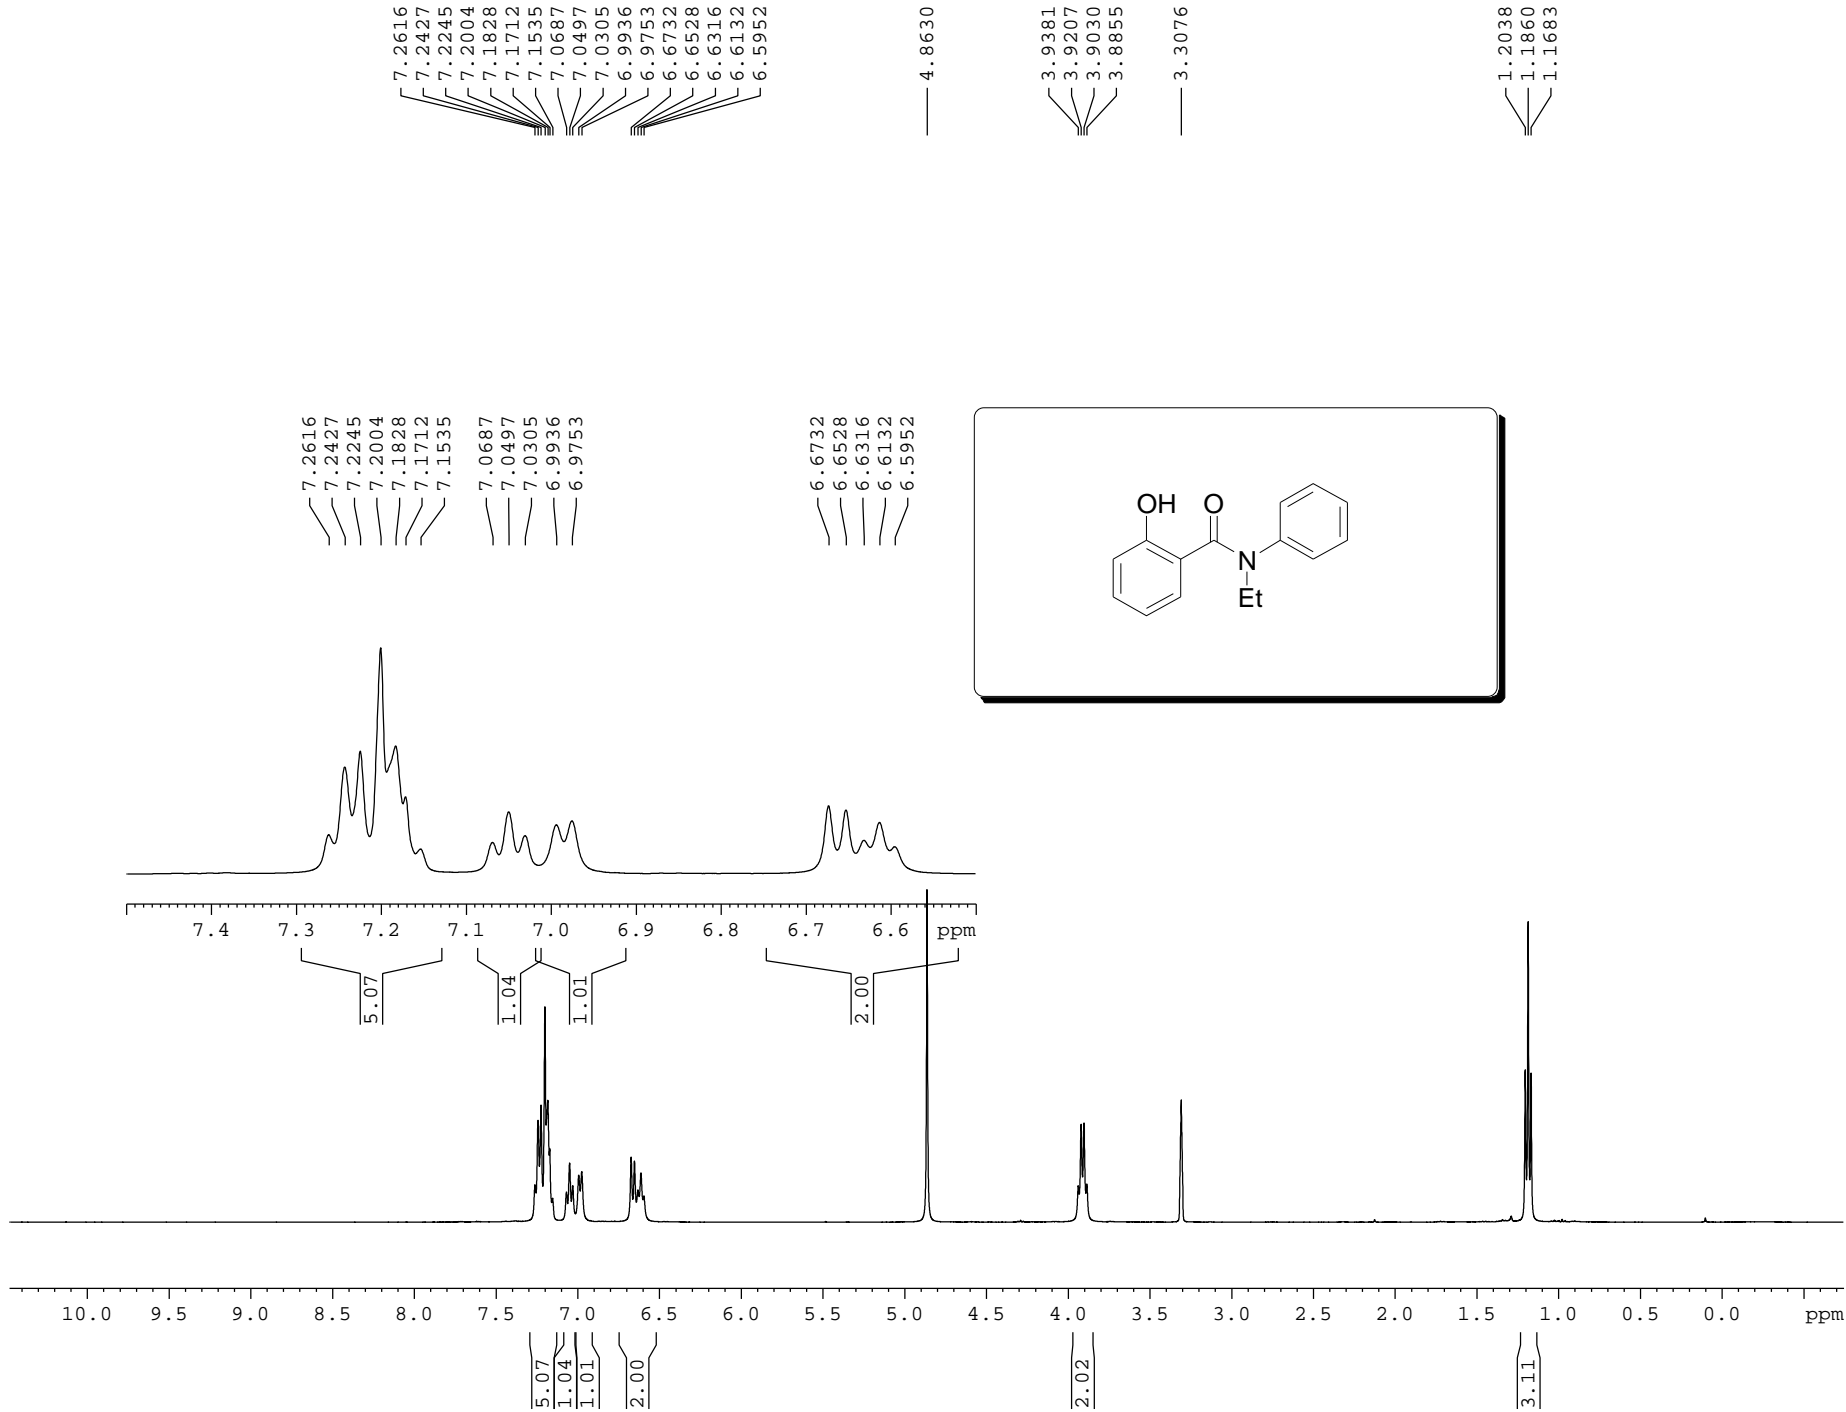

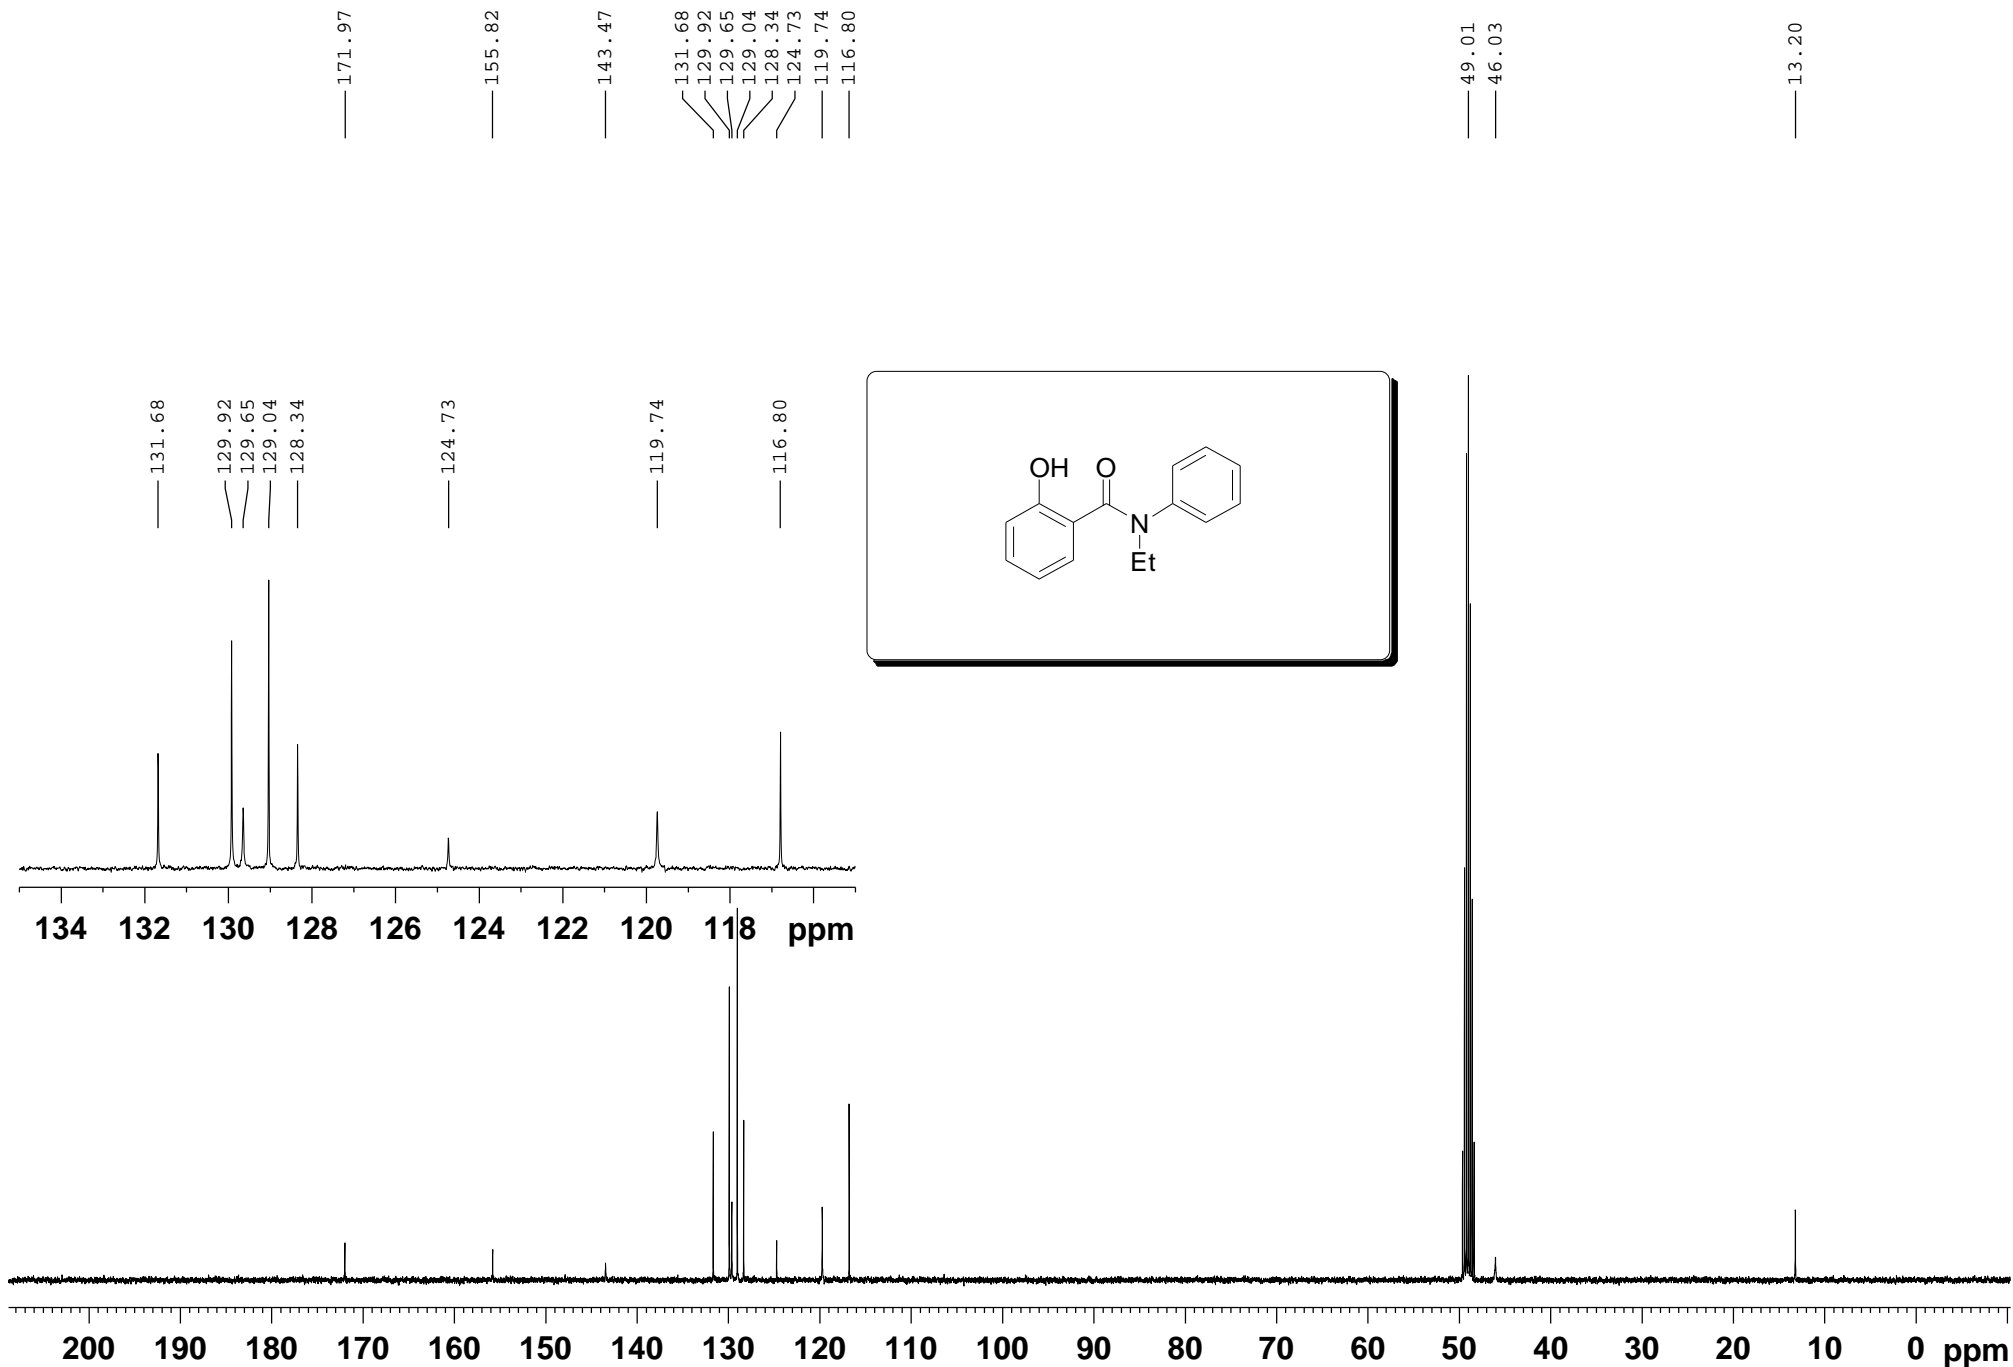

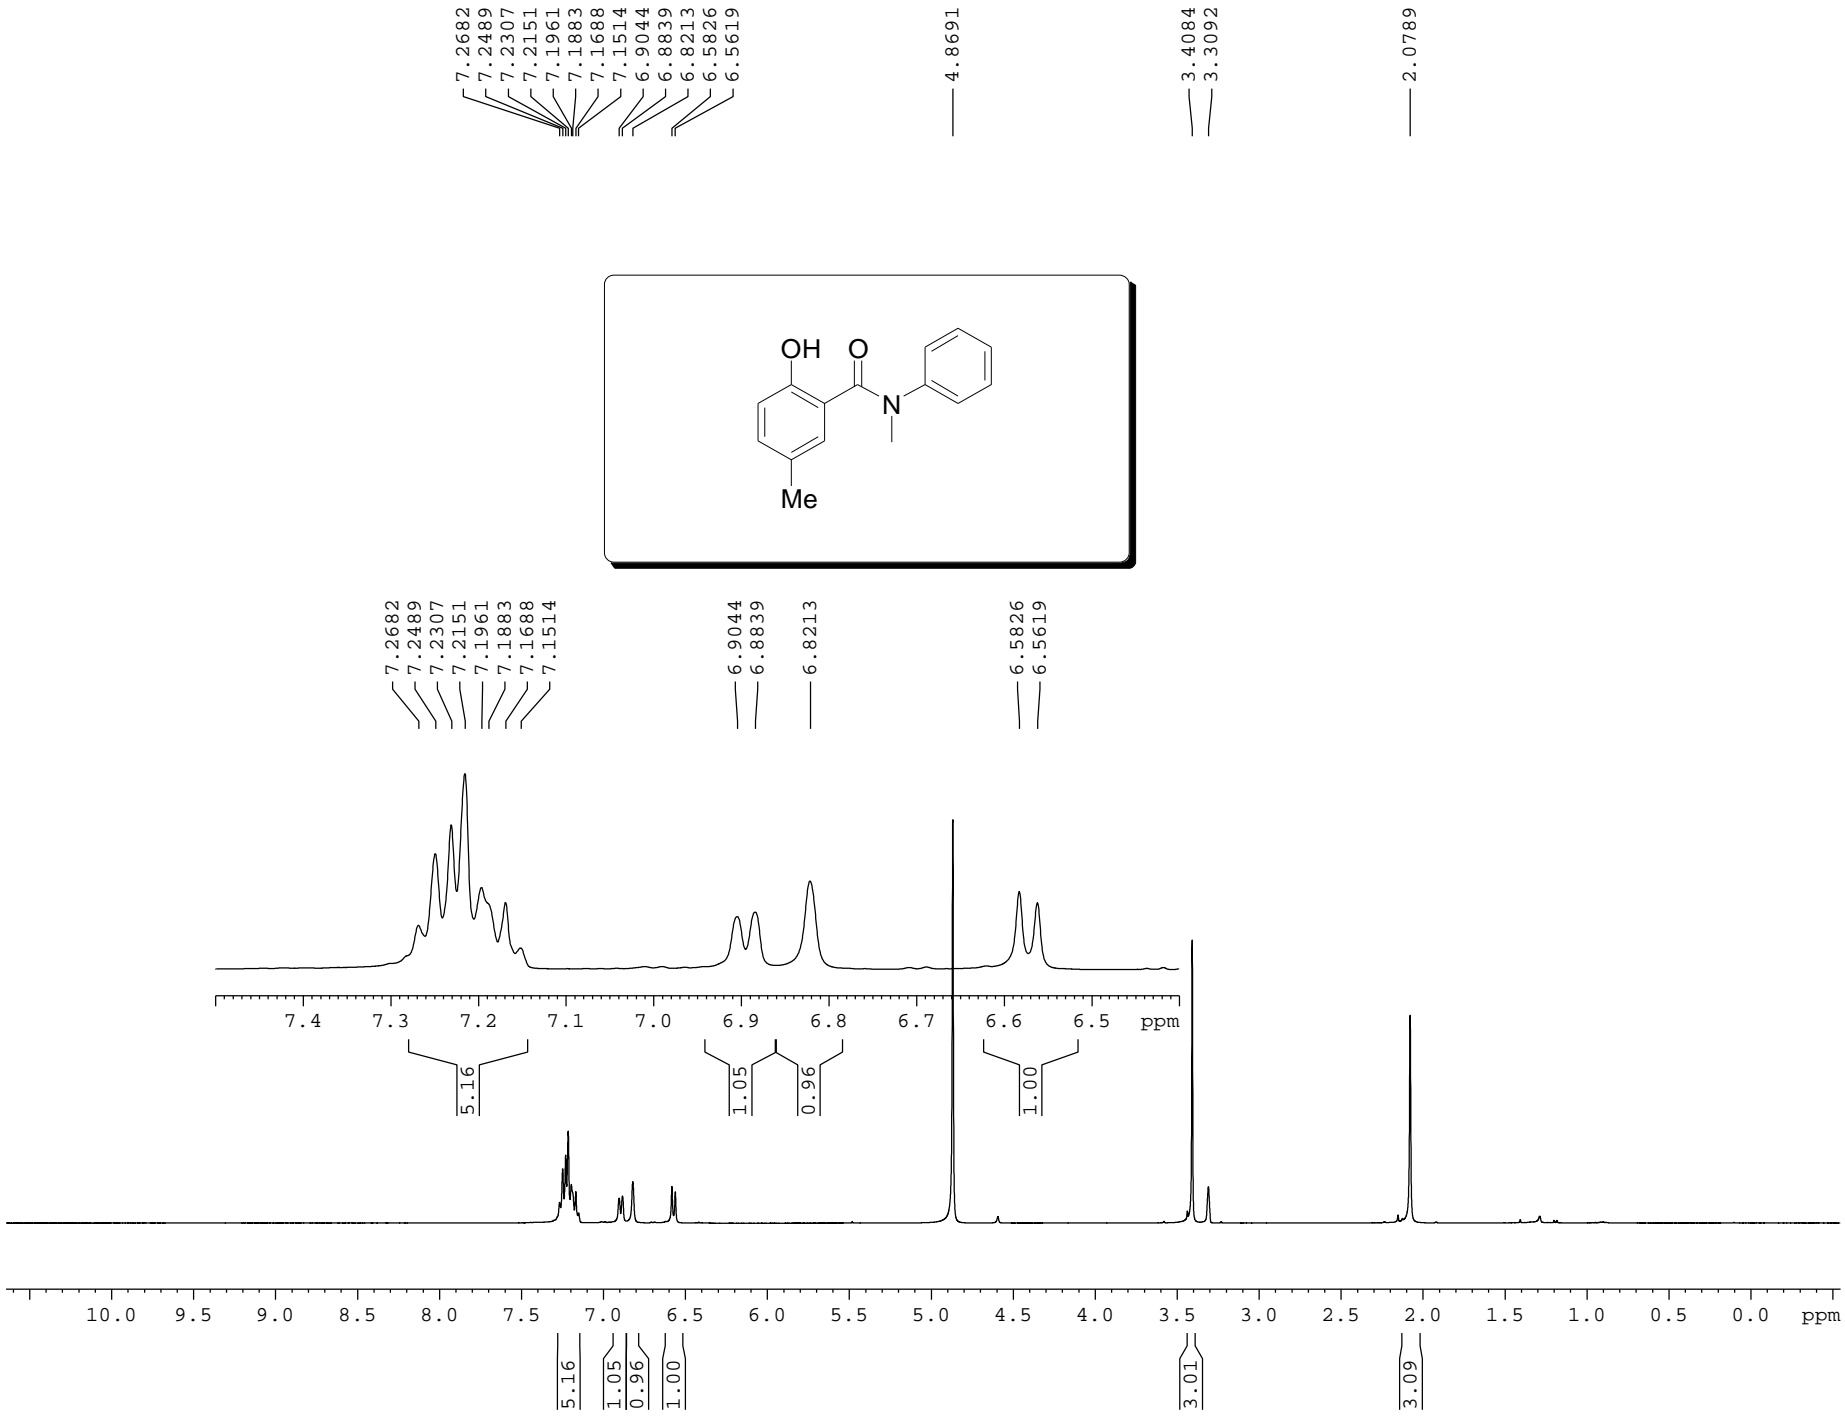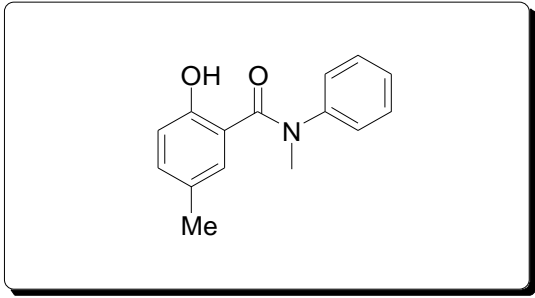

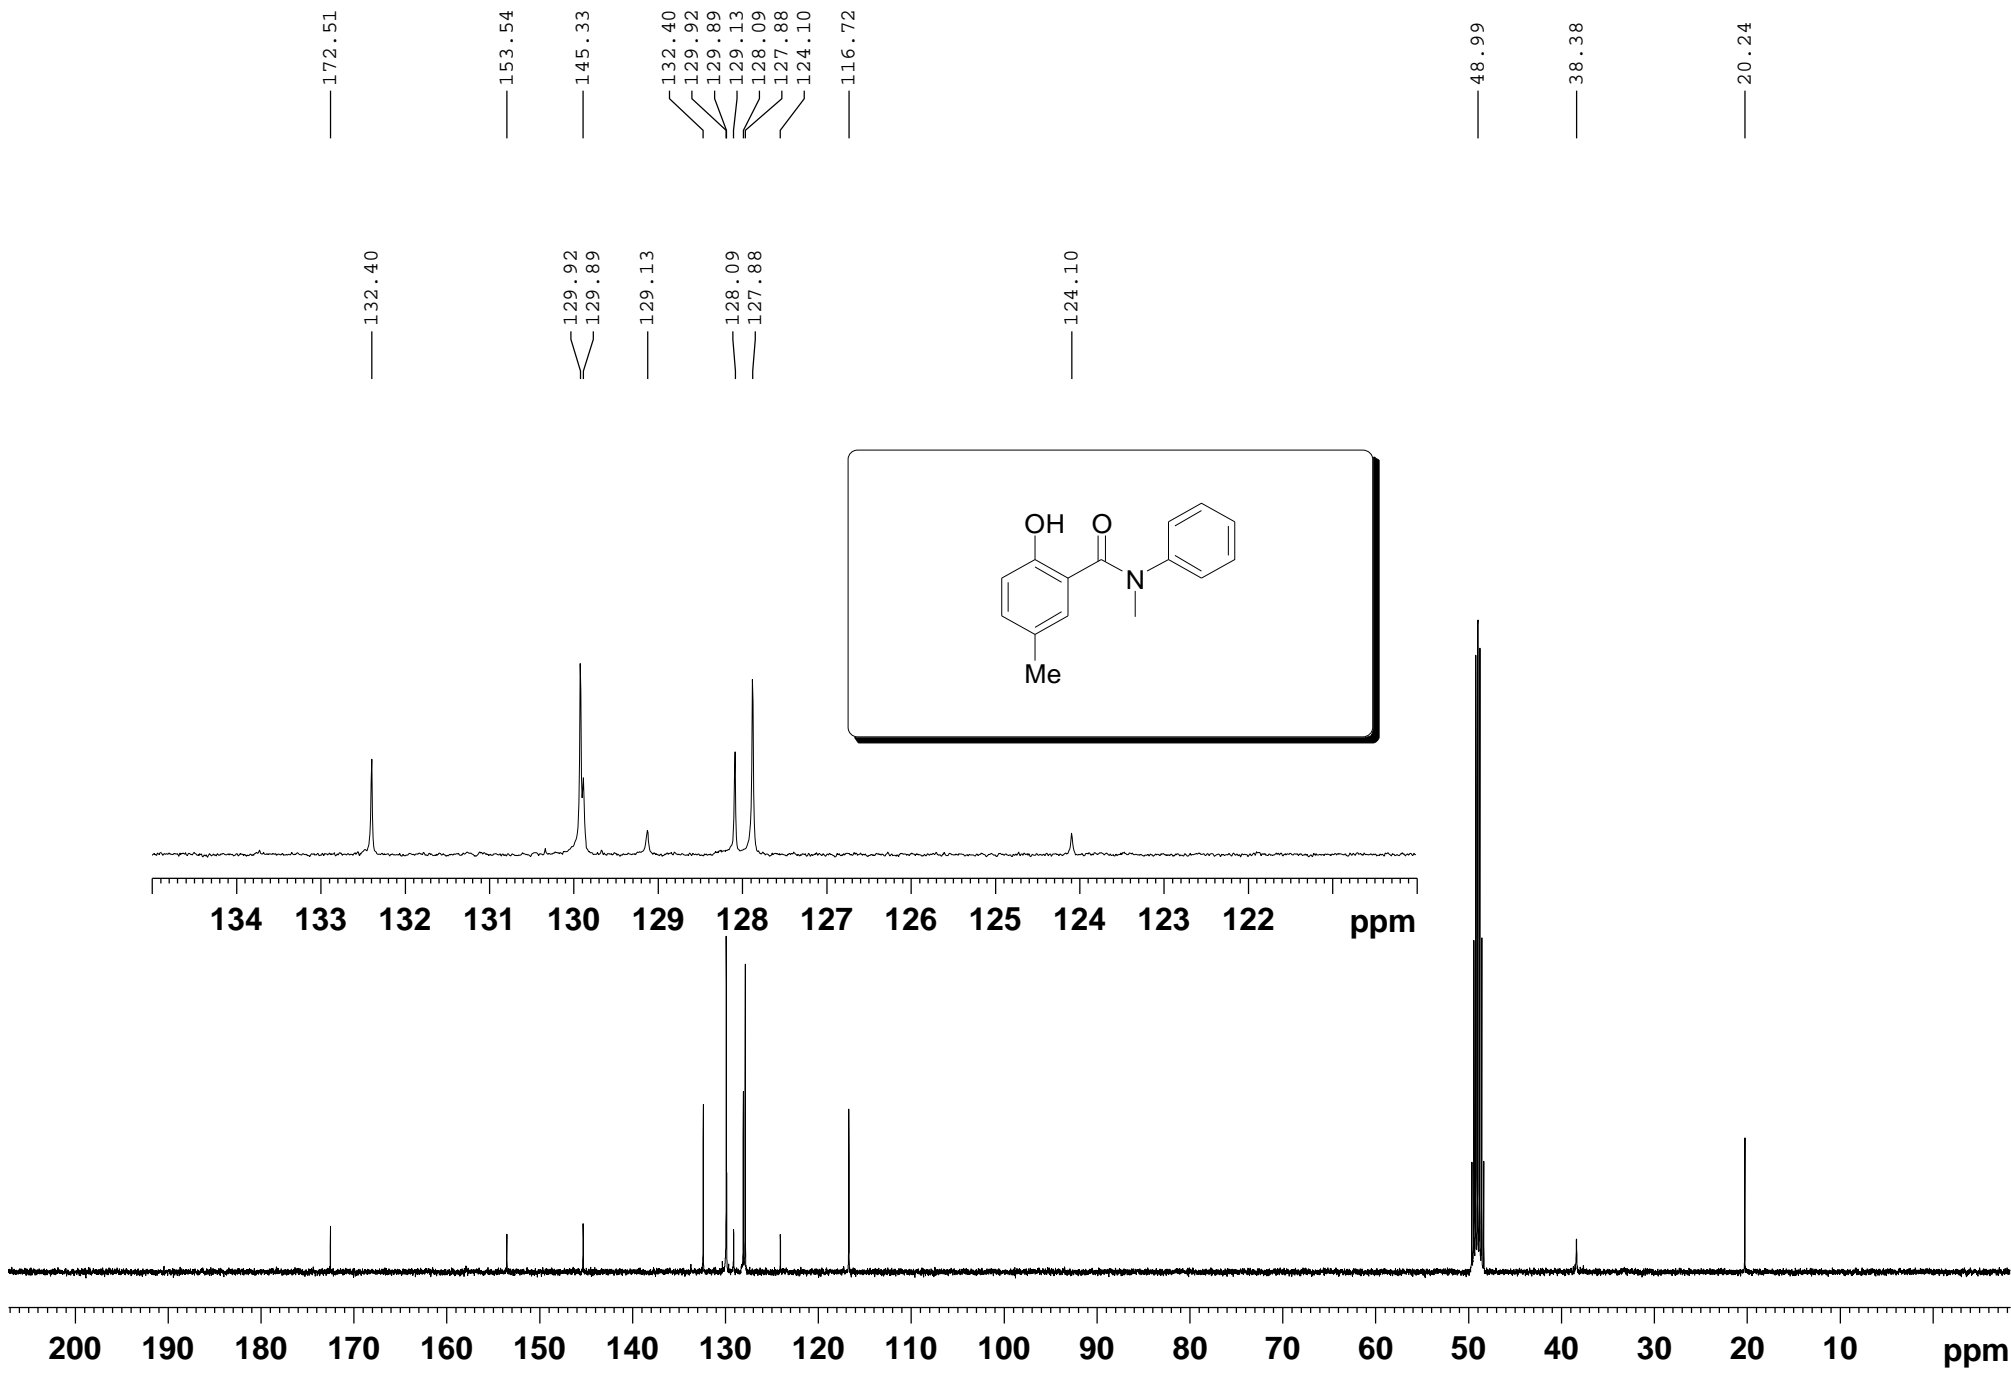

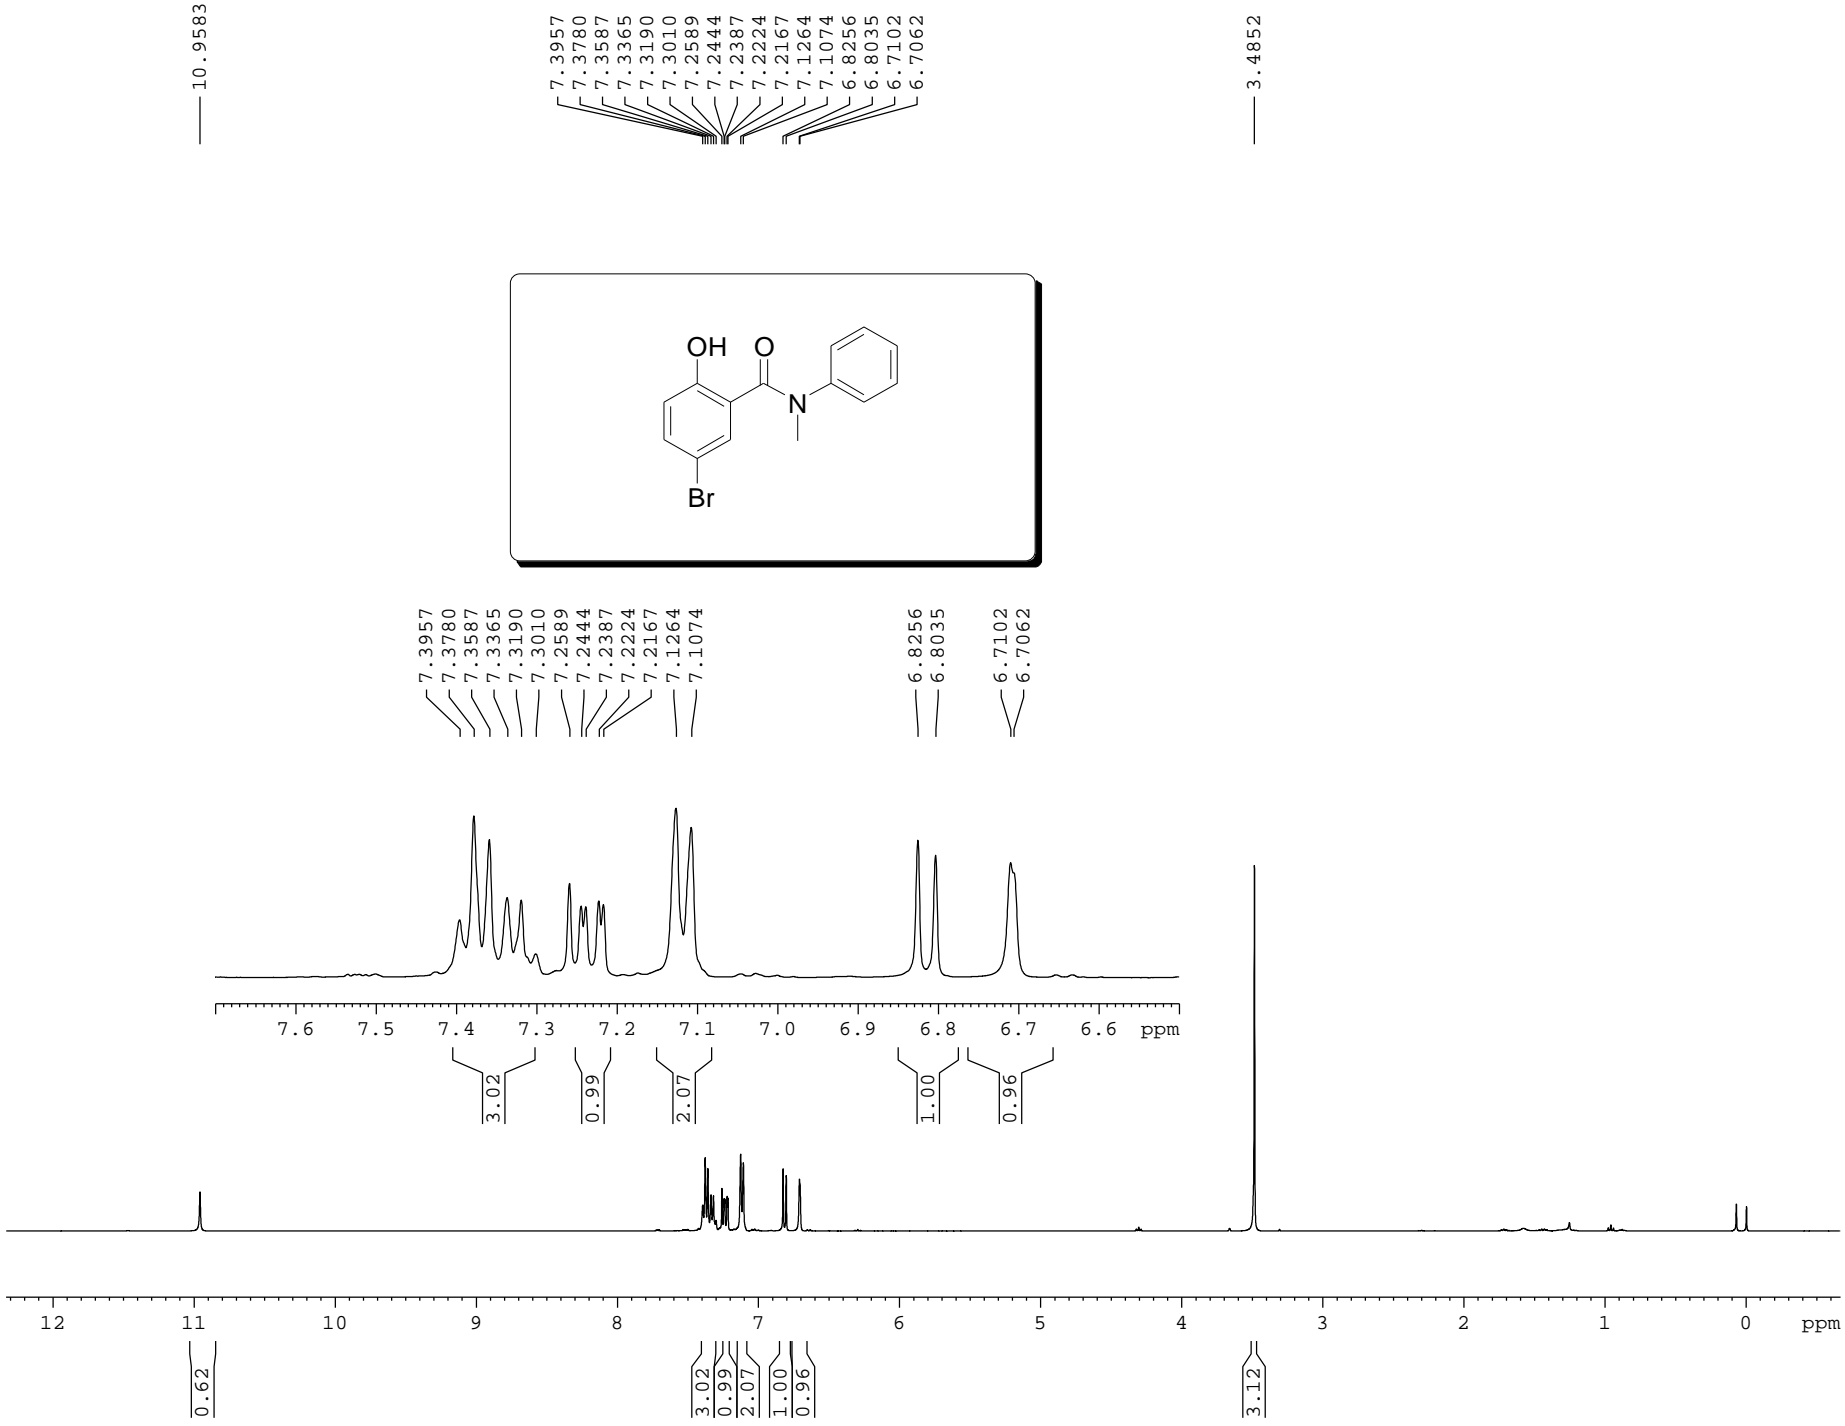

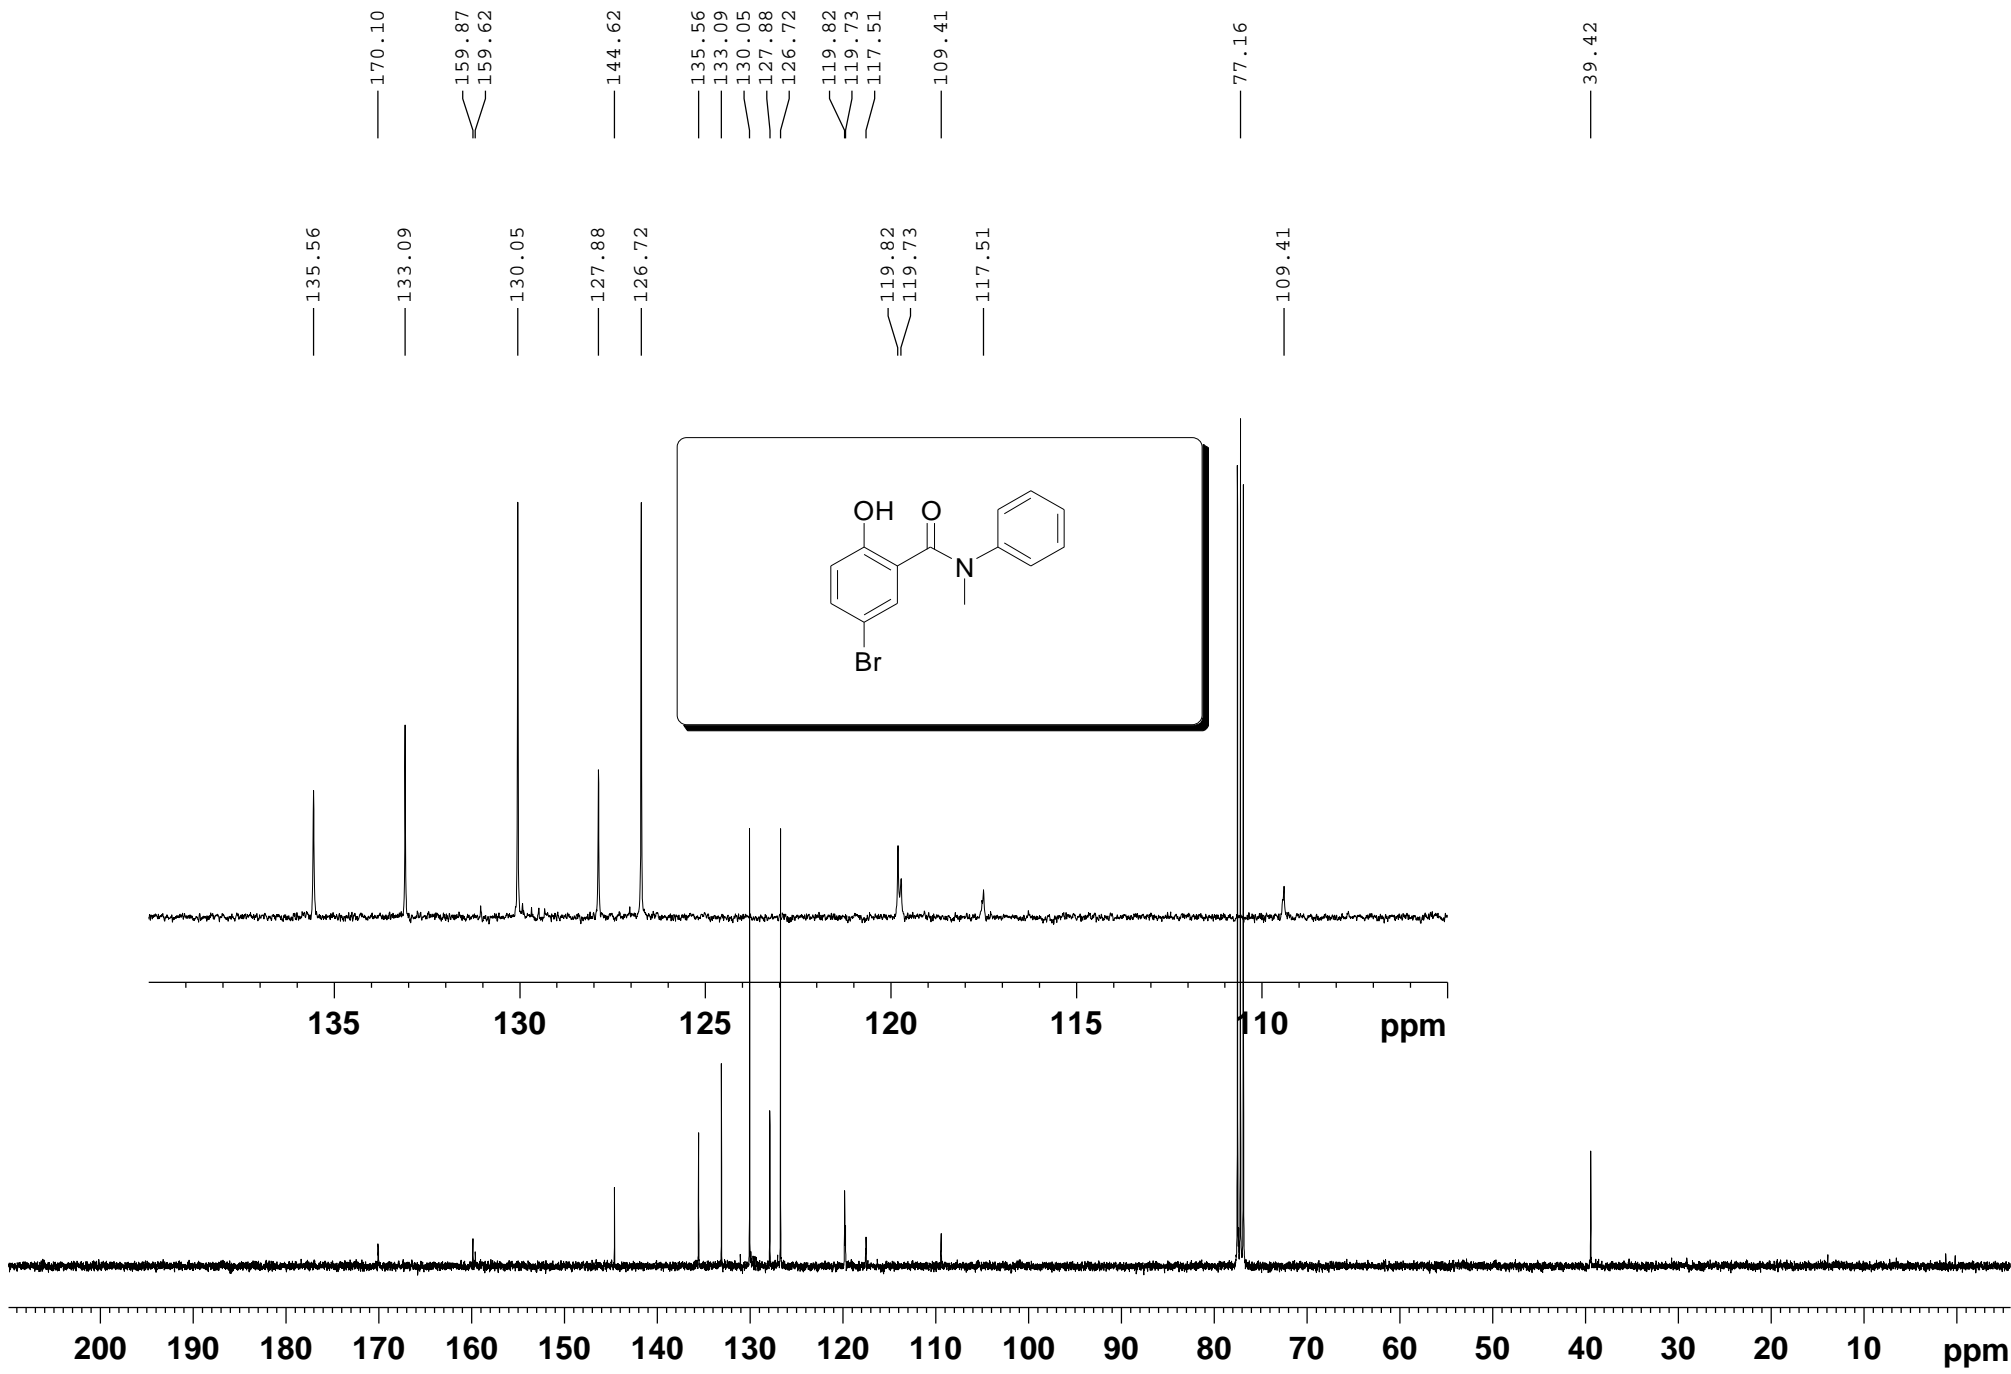



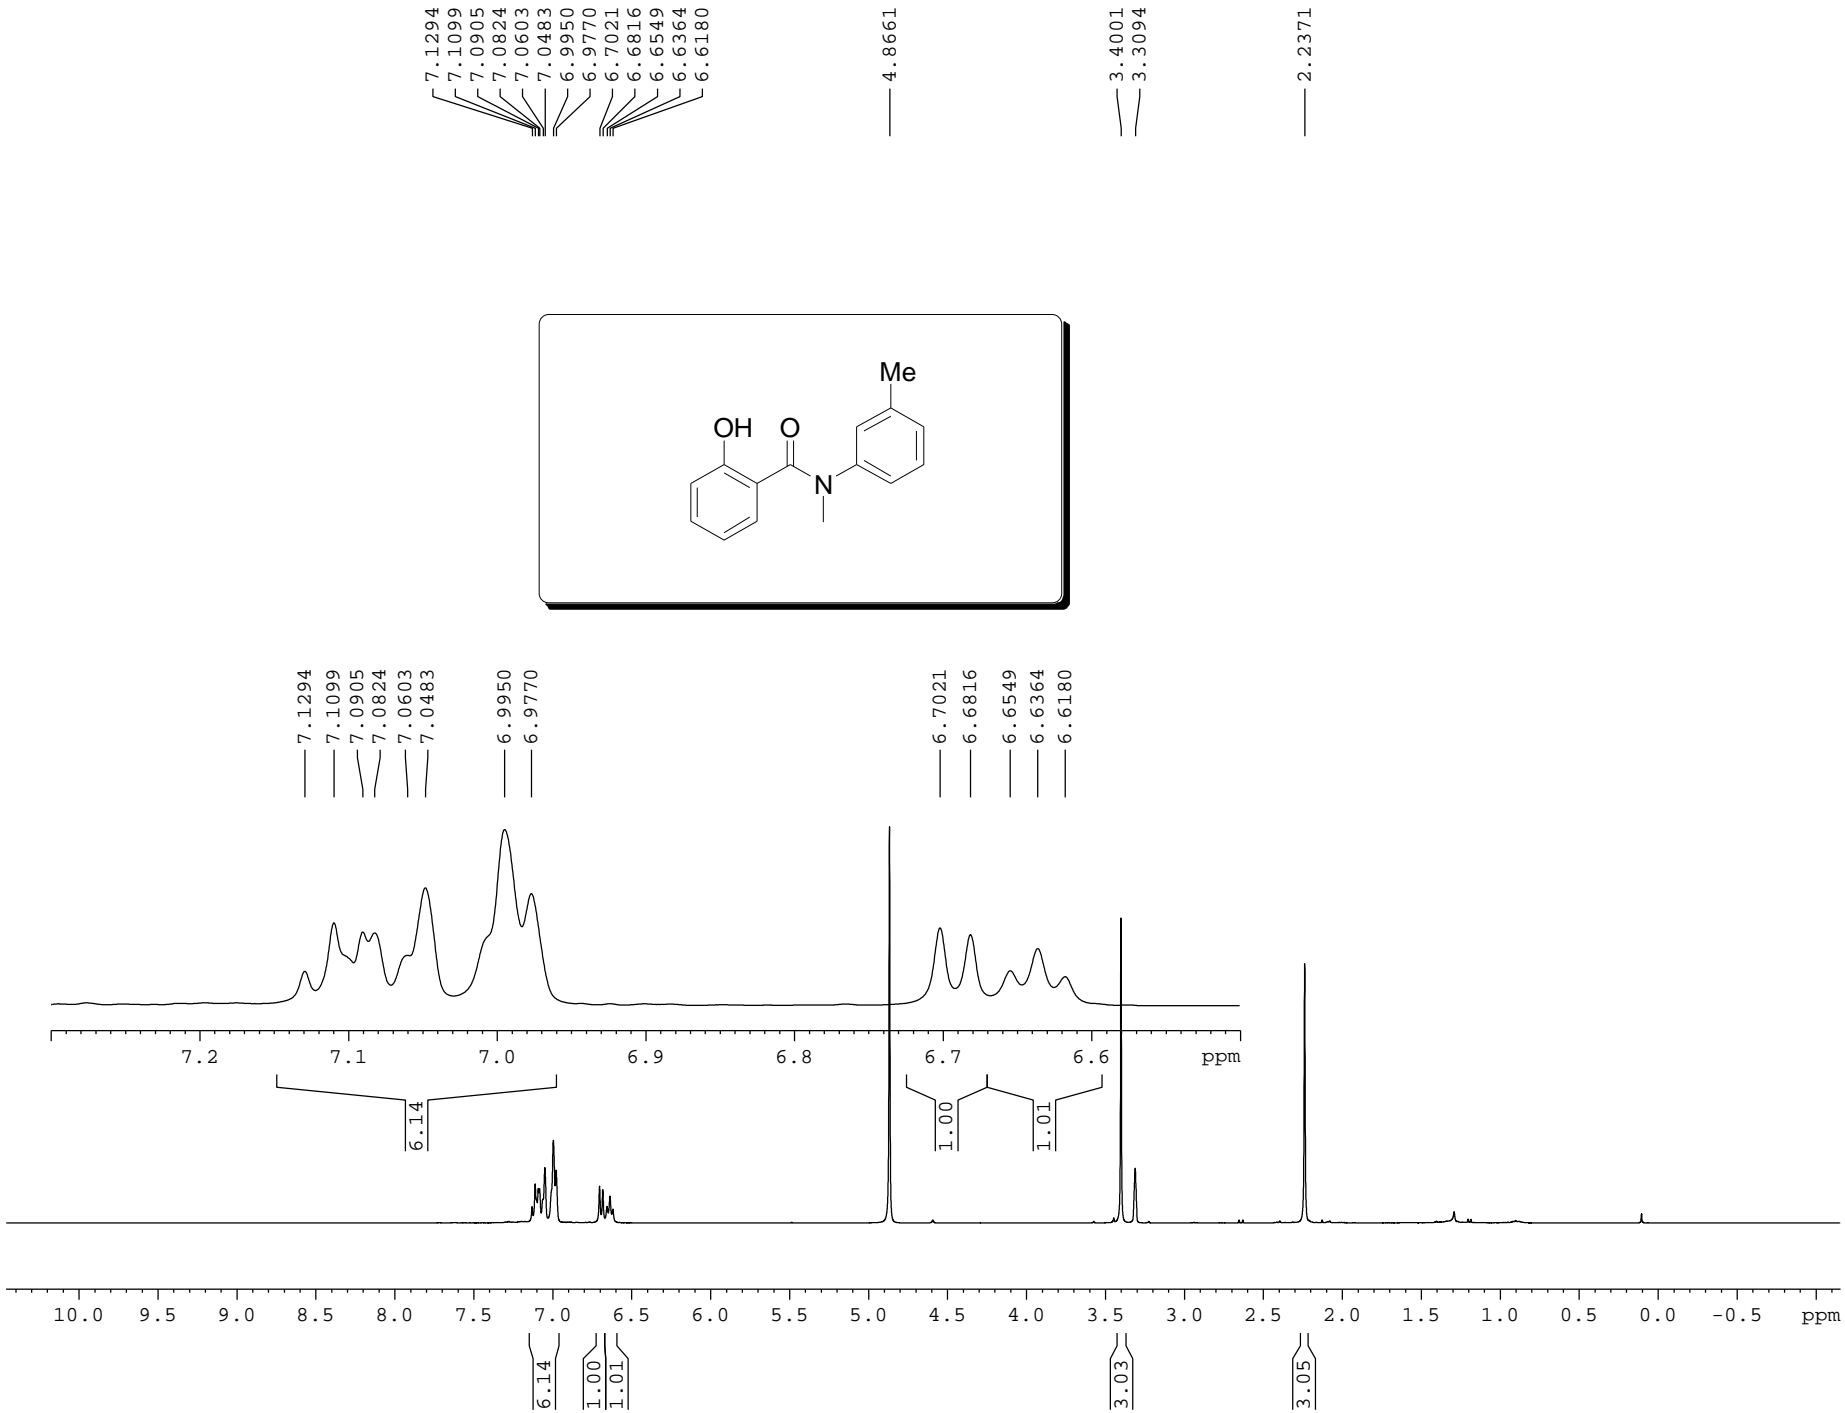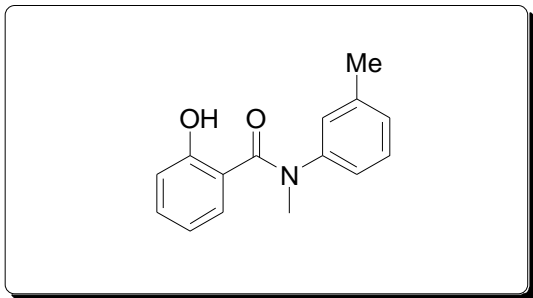

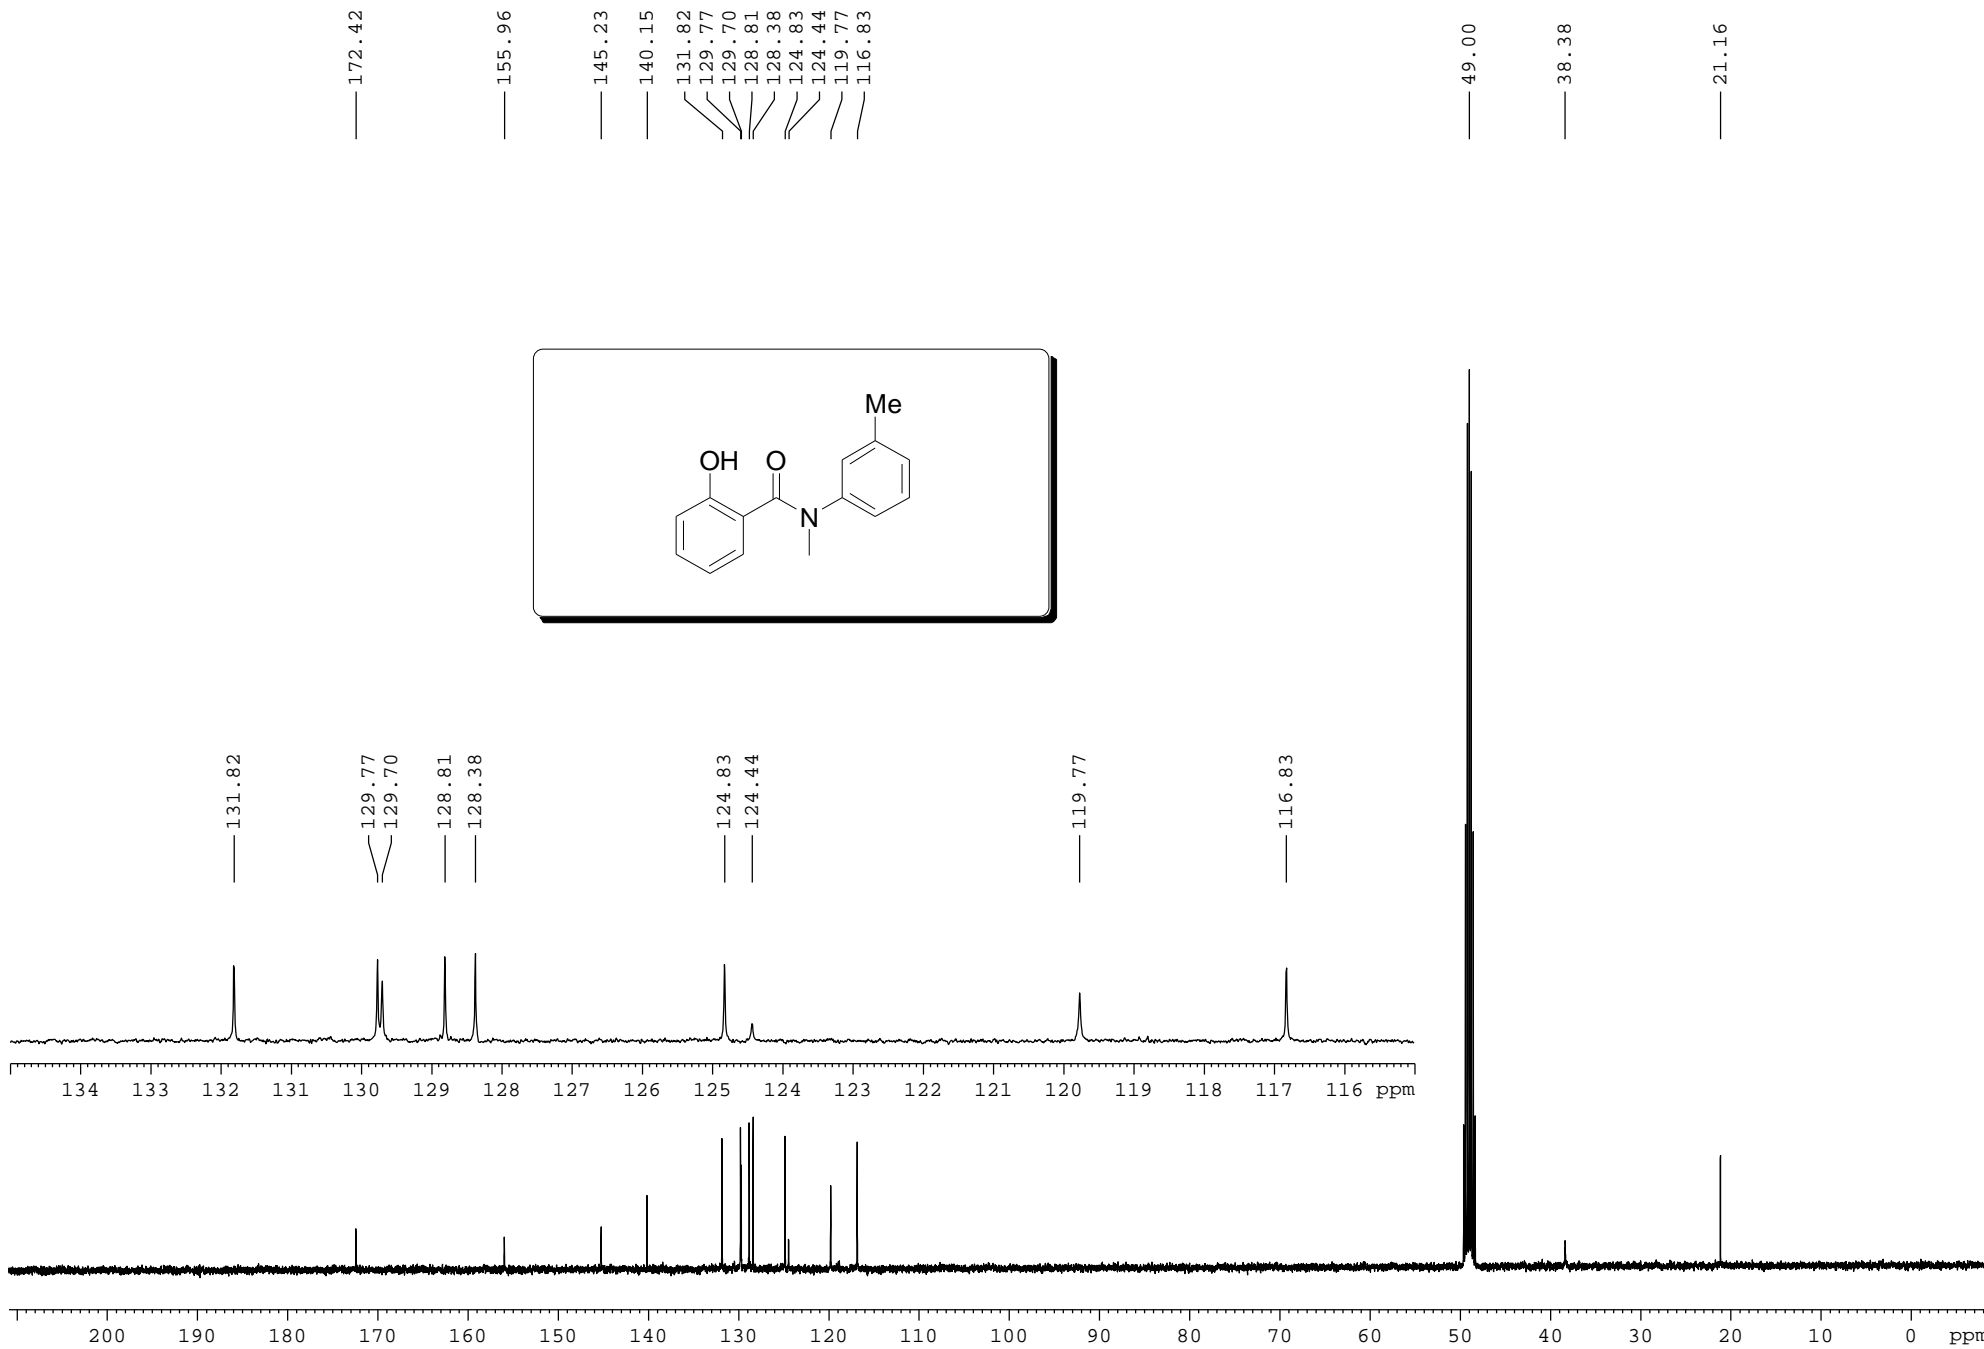

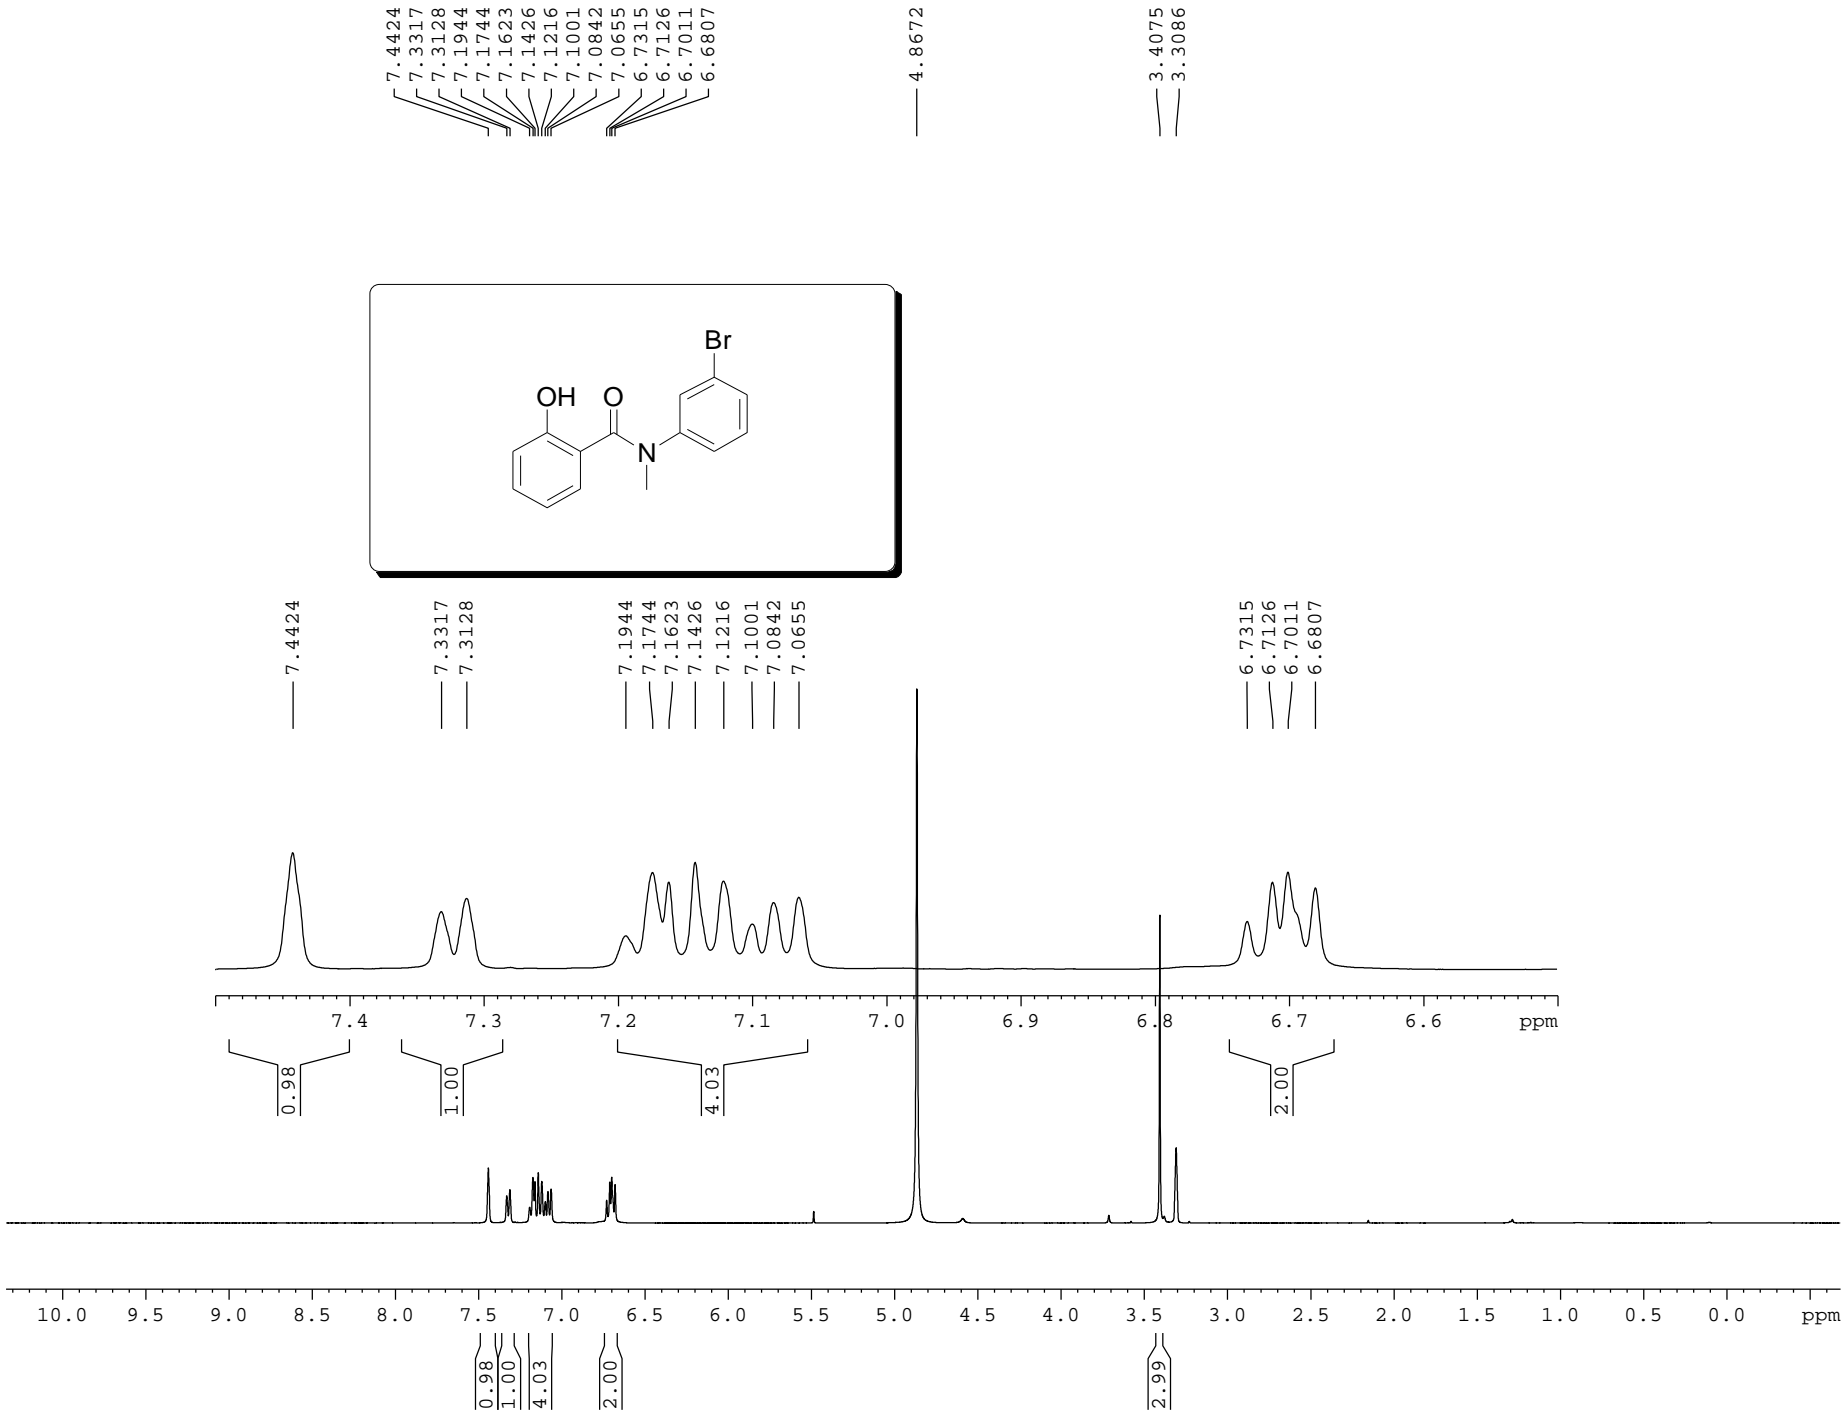

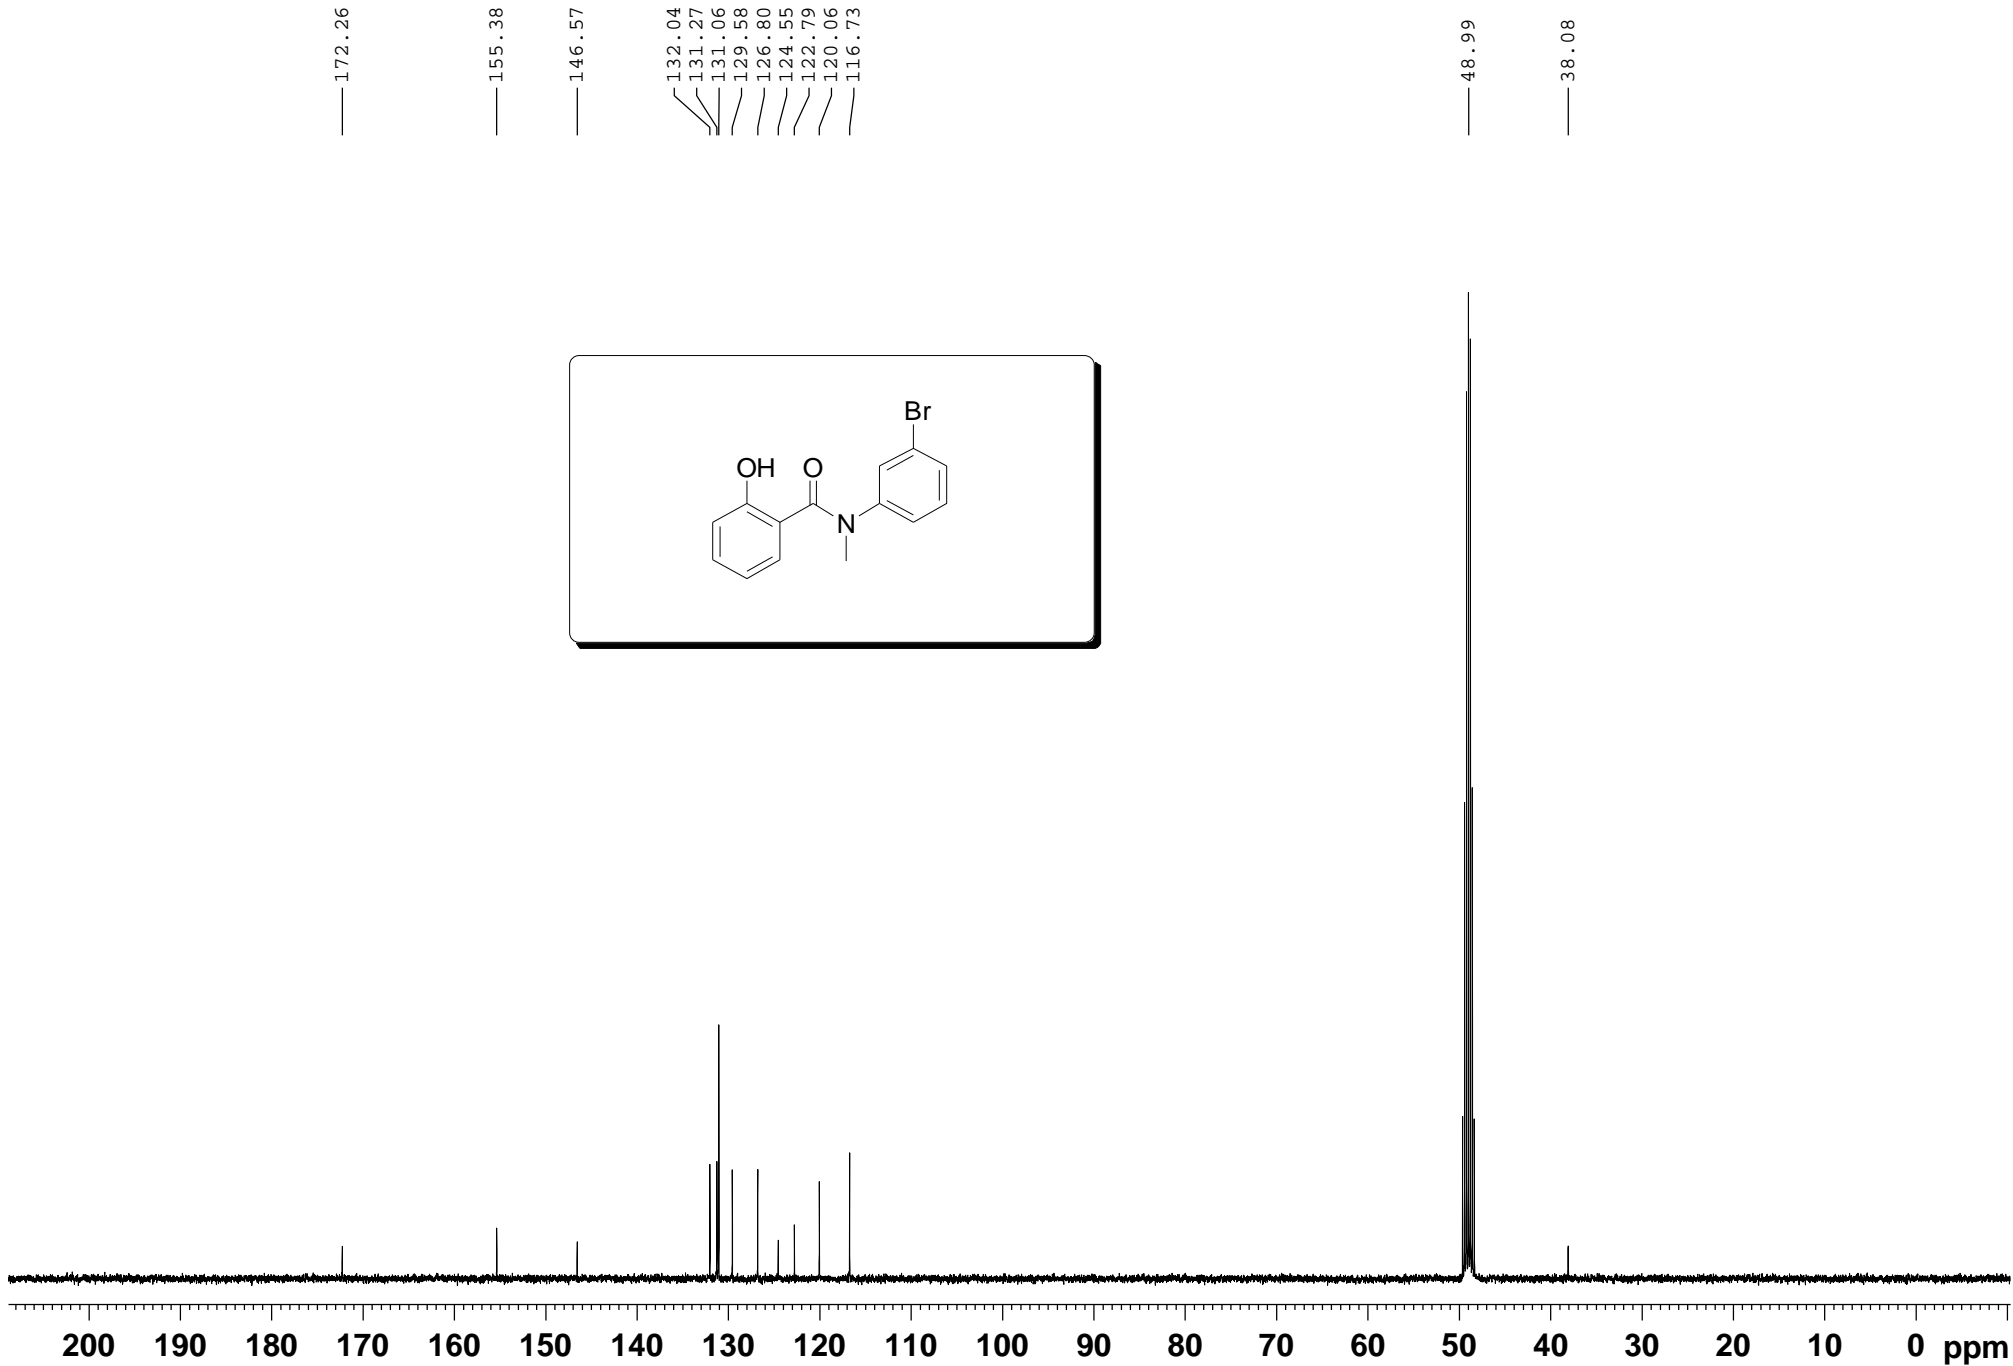

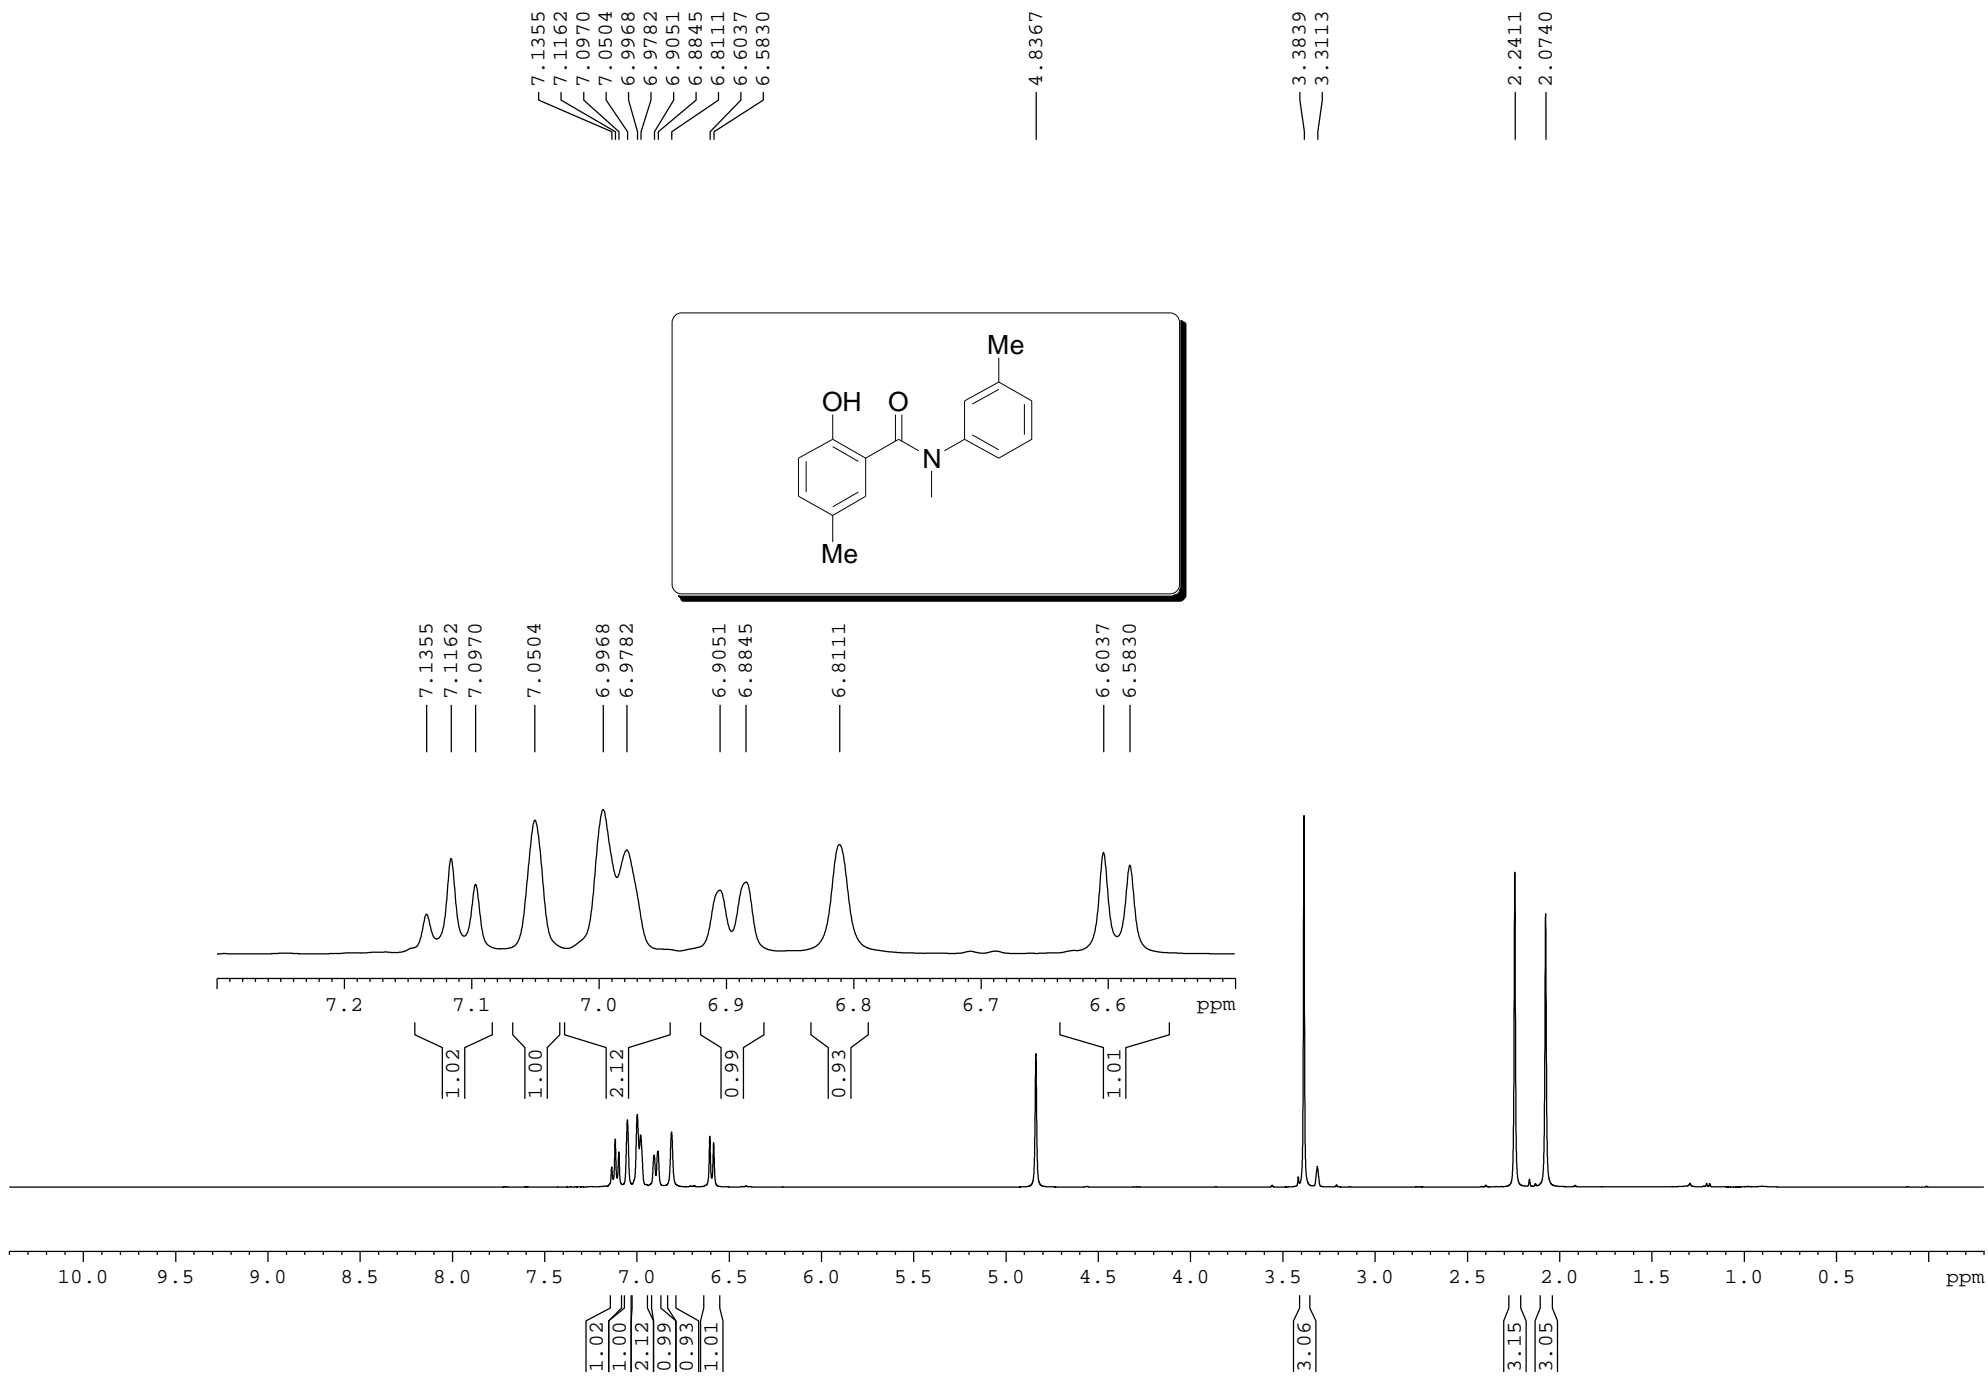

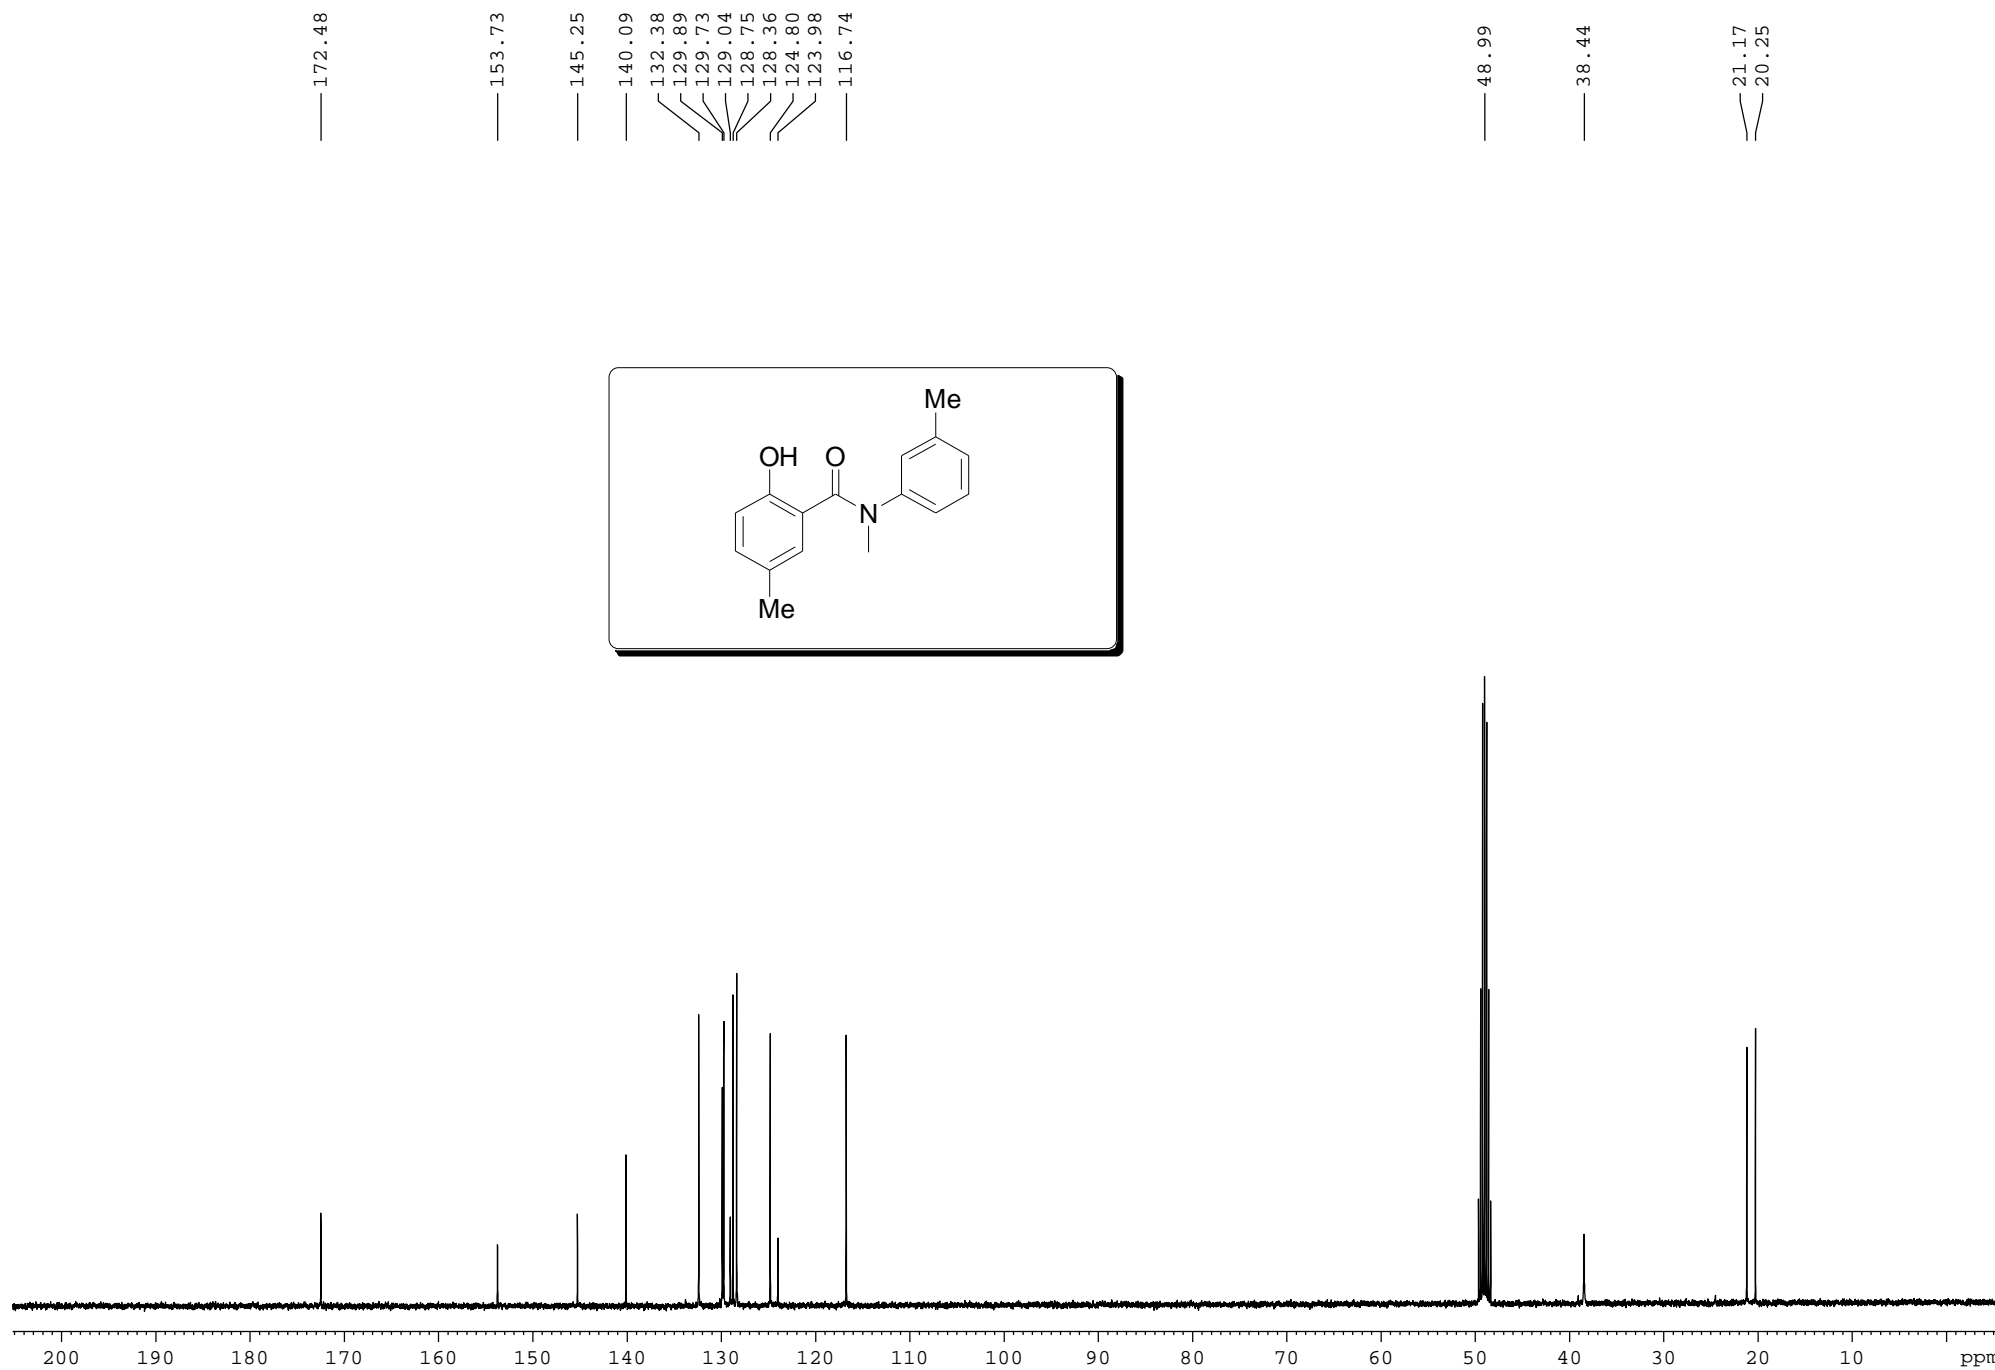

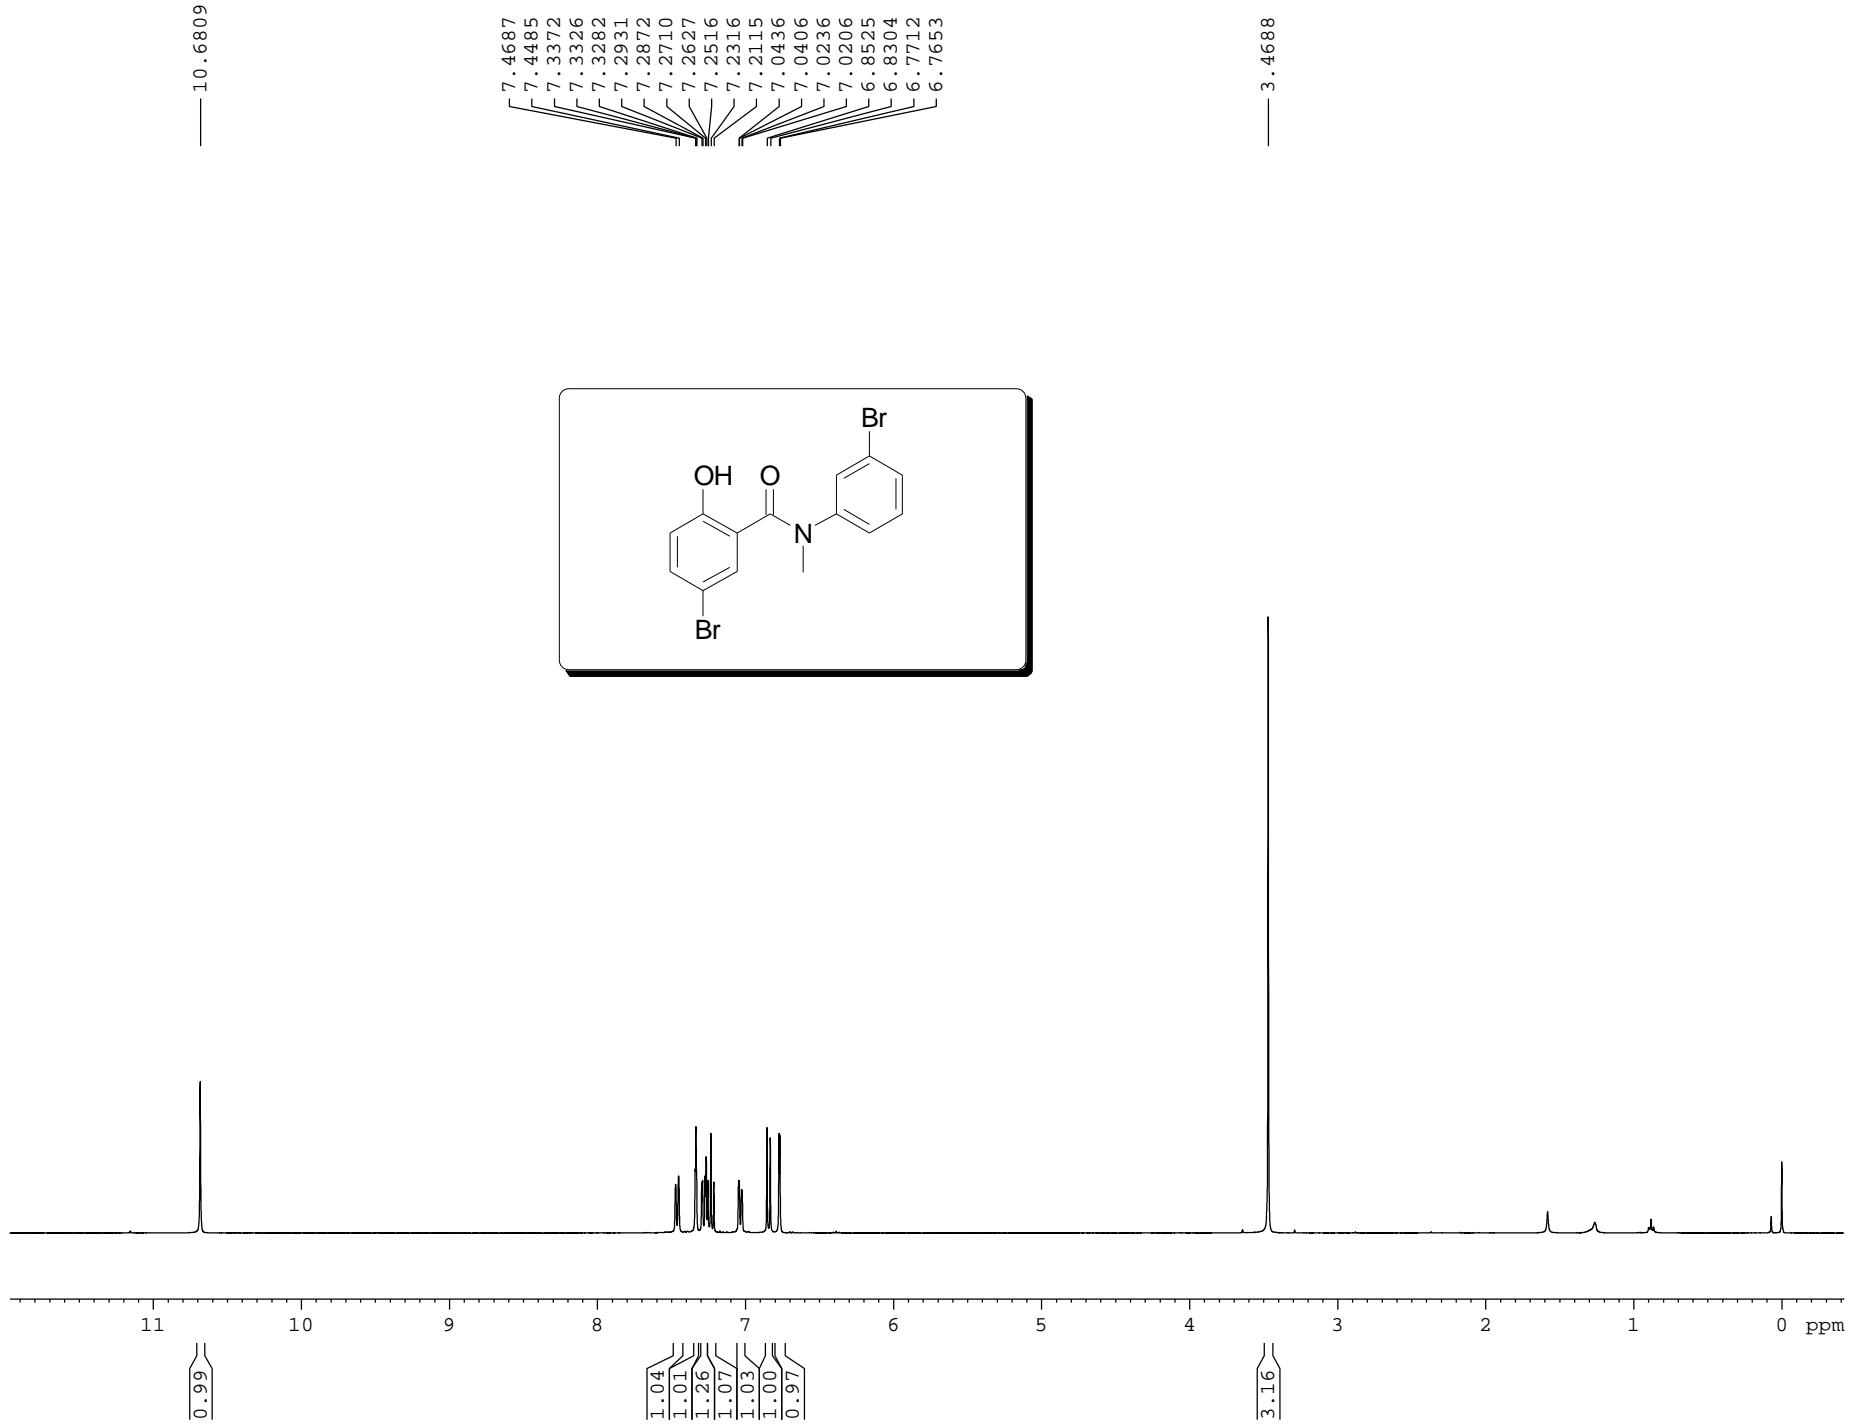

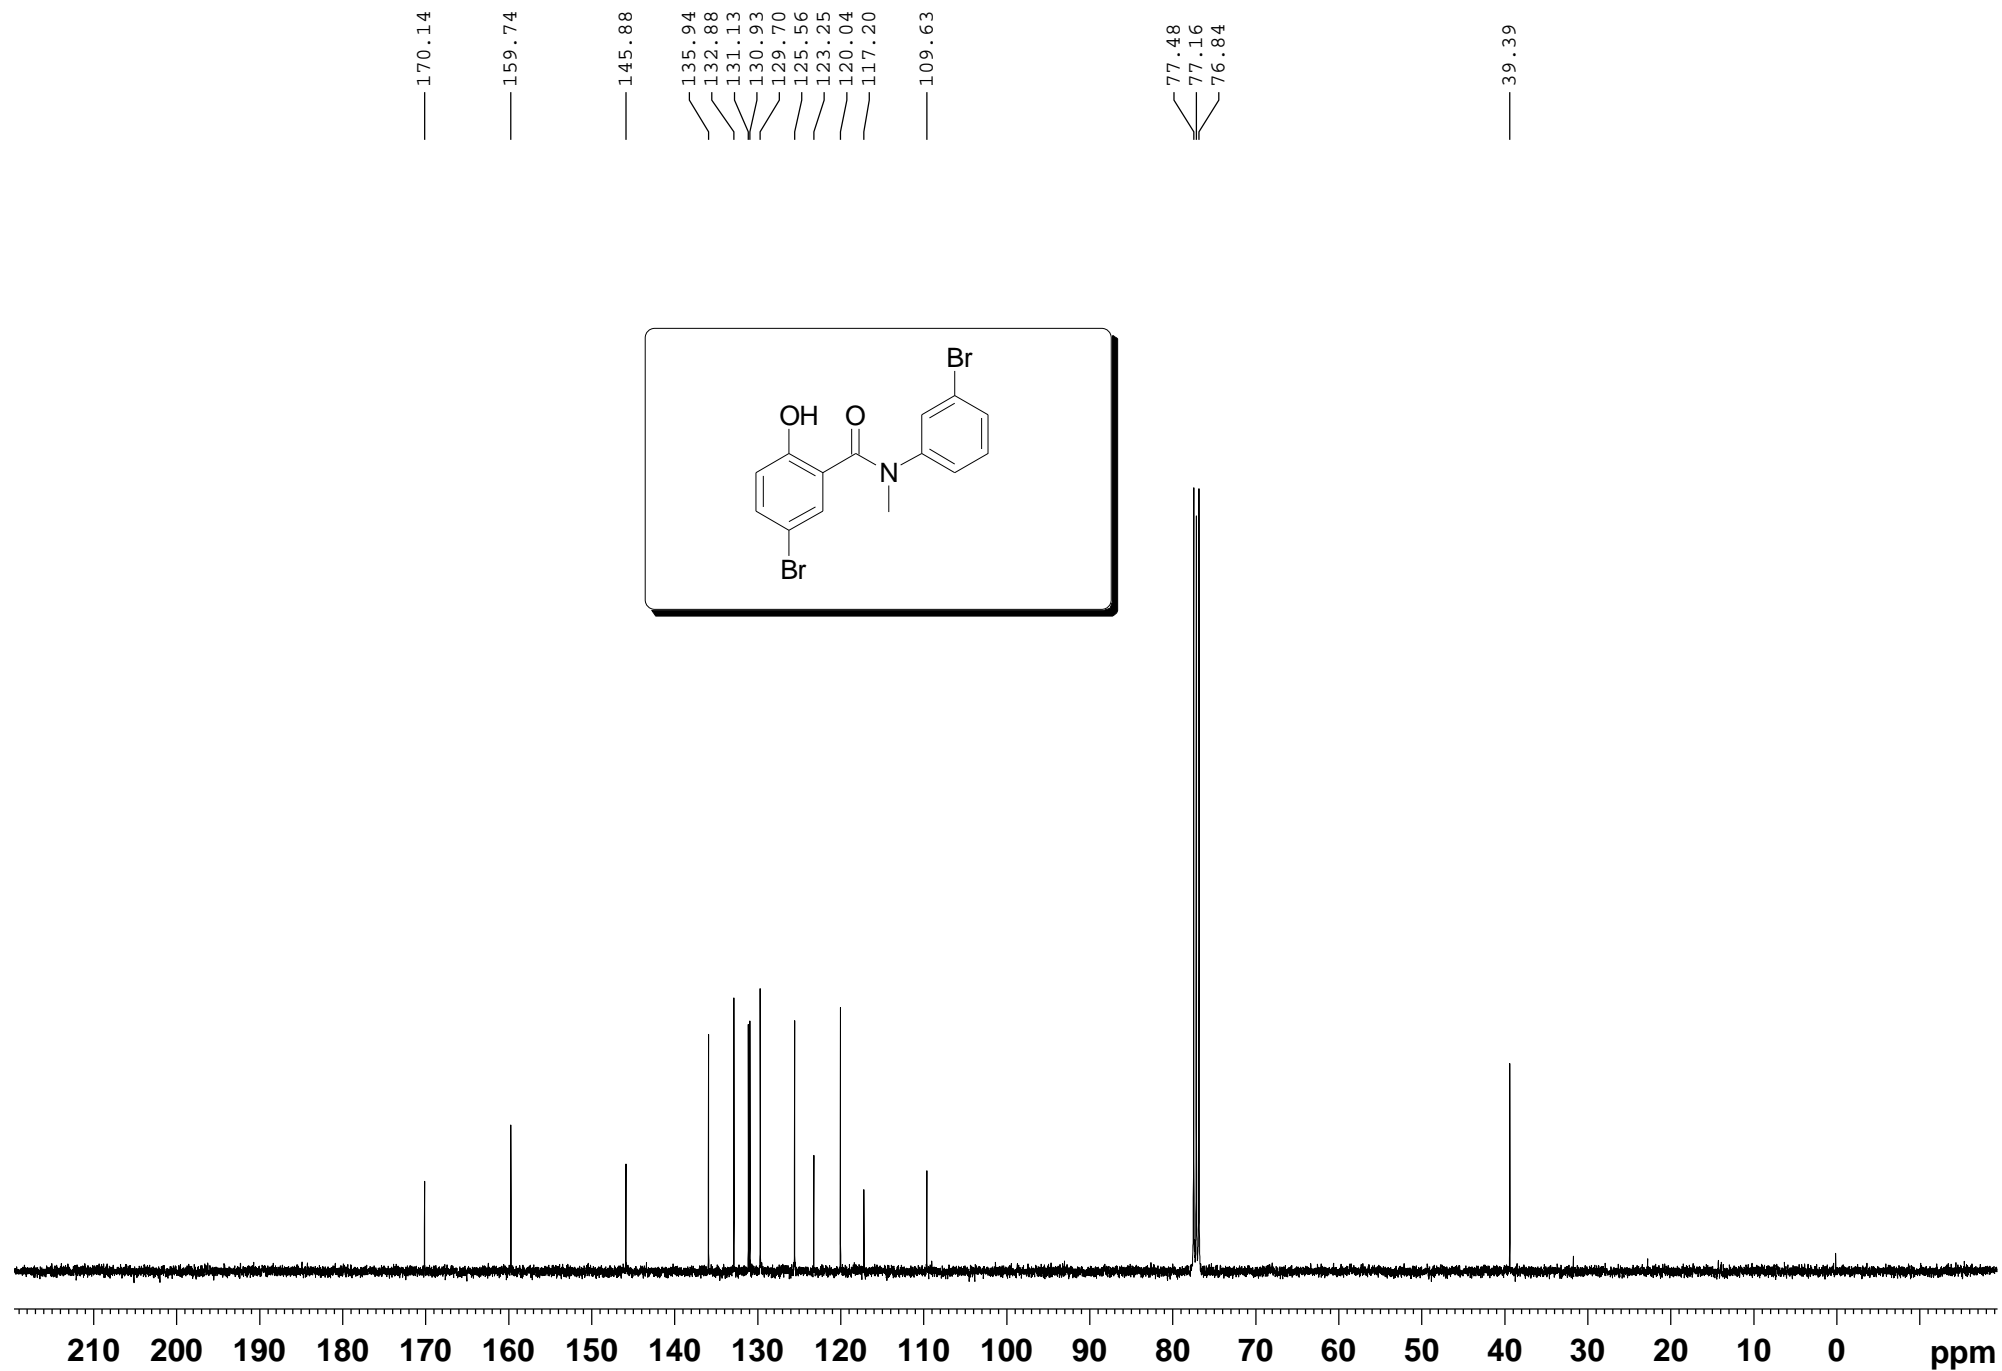

— 170.14

— 159.74

— 145.88

— 135.94

— 132.88

— 131.13

— 130.93

— 129.70

— 125.56

— 123.25

— 120.04

— 117.20

— 109.63

— 77.48

— 77.16

— 76.84

— 39.39



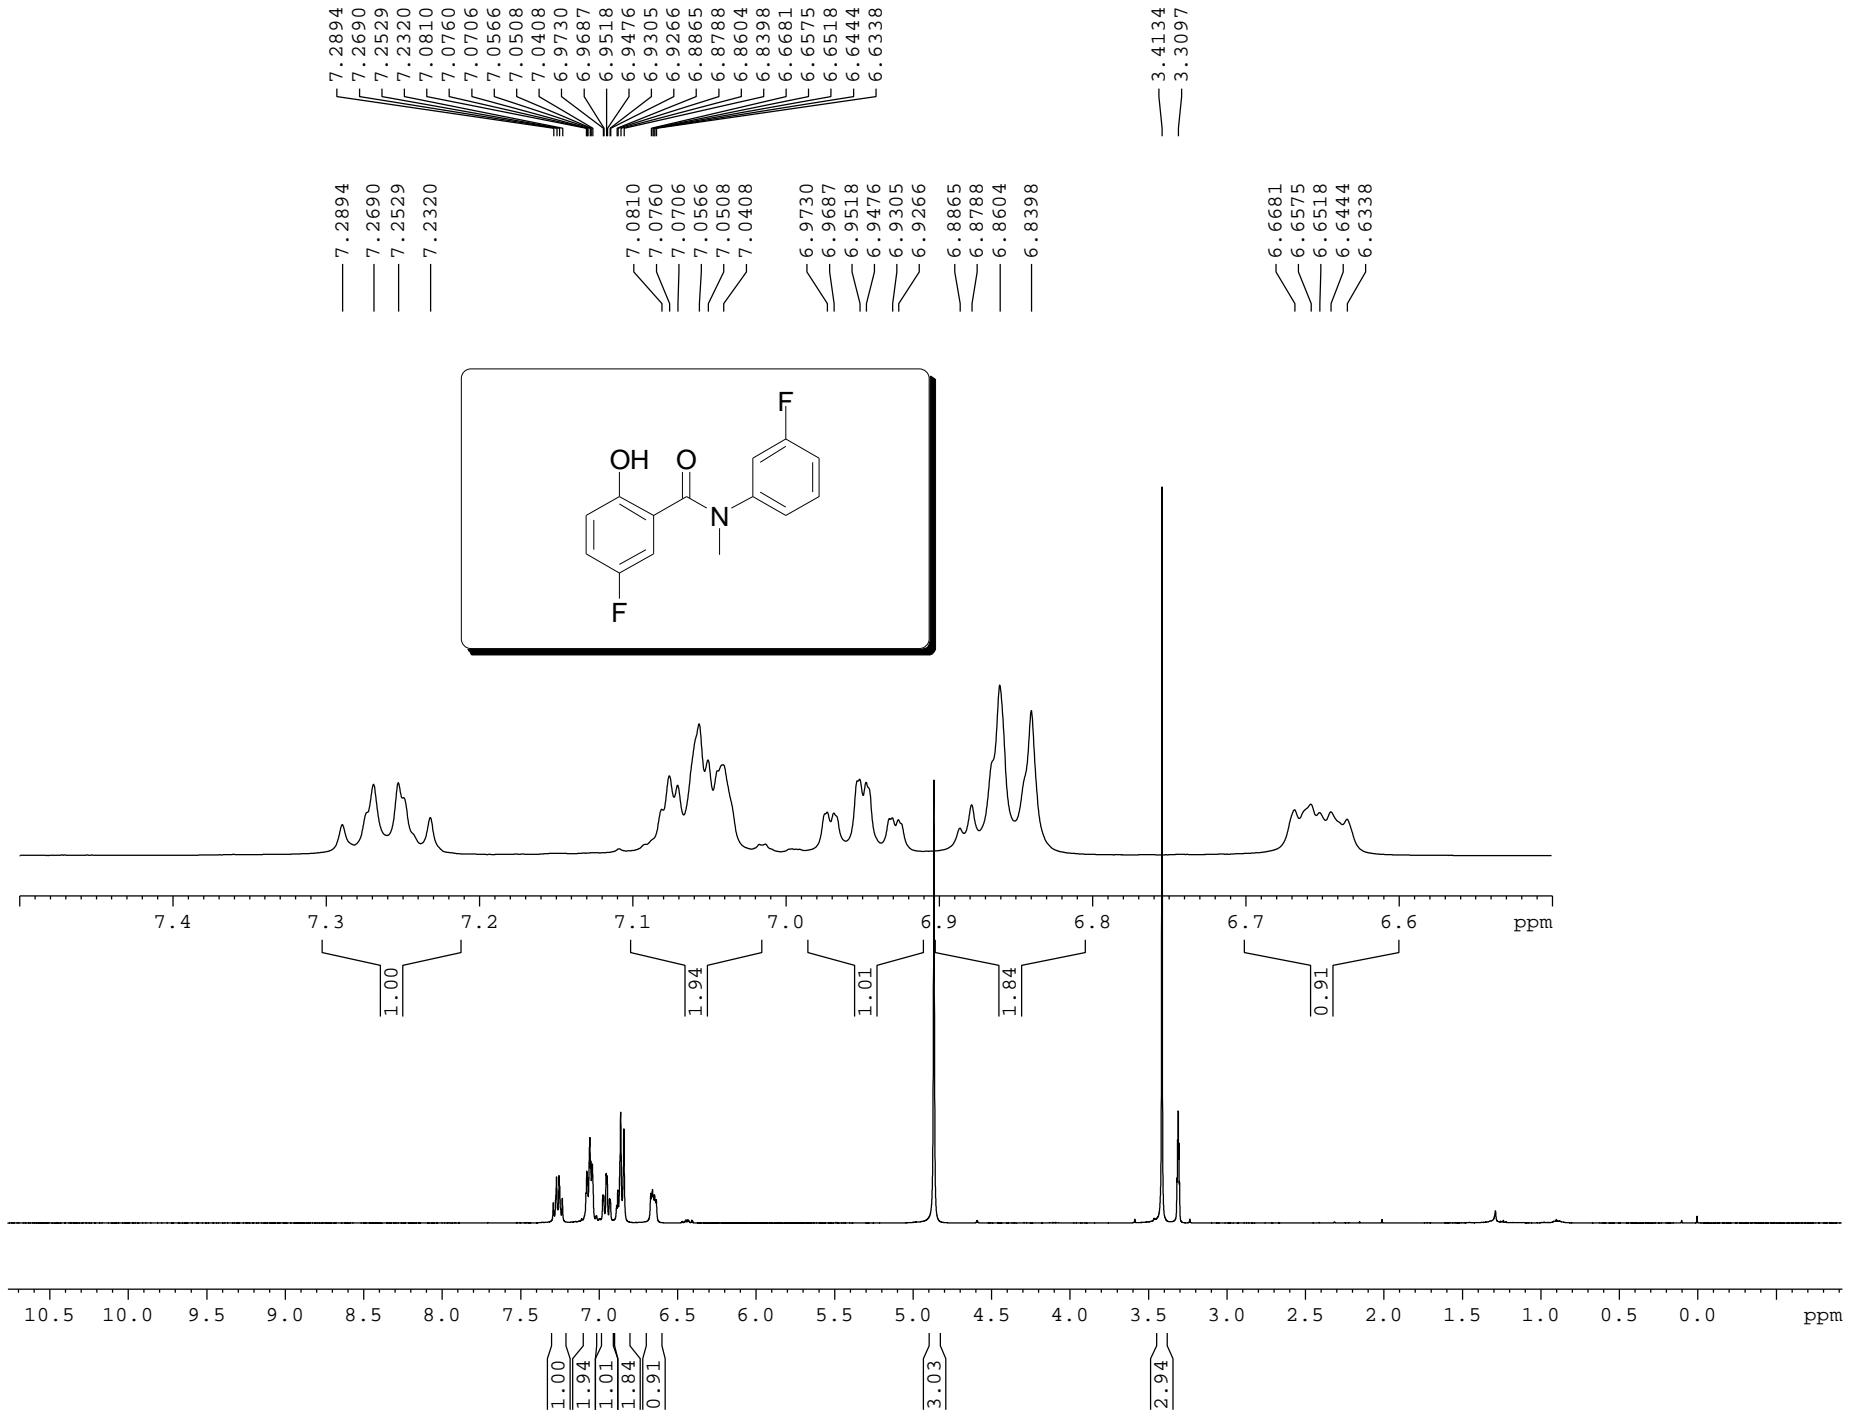

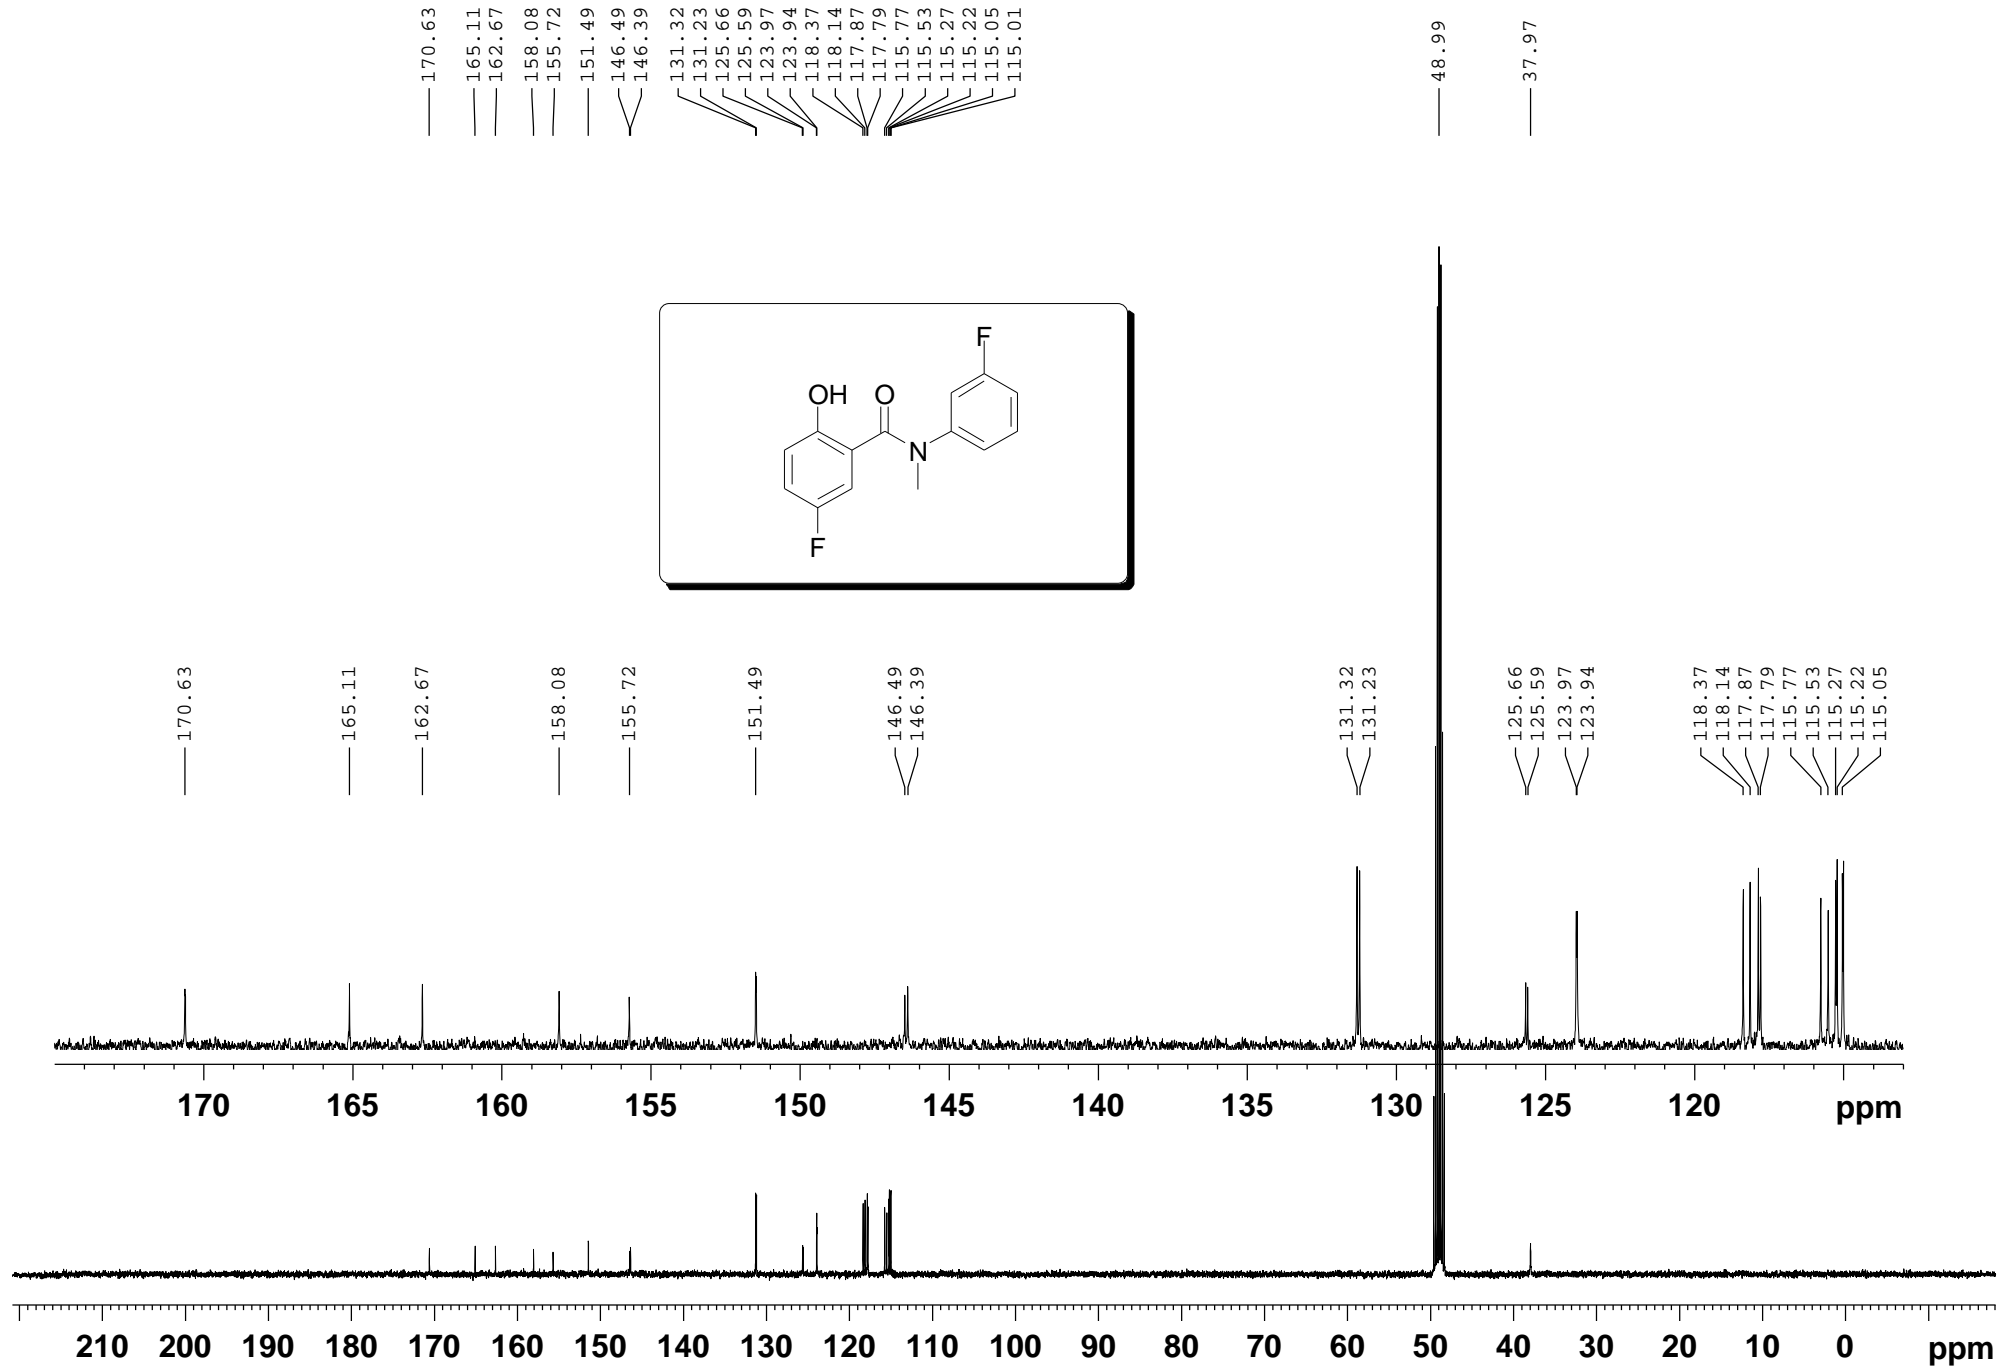

8.1361  
8.1135  
7.4416  
7.4190  
7.1236  
7.1031  
6.9459  
6.9415  
6.9254  
6.9210  
6.8493  
6.8449

3.4721  
3.3105

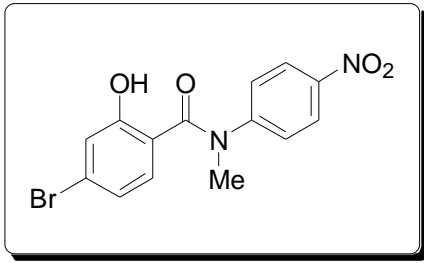

Current Data Parameters  
 NAME syh-6-93-1  
 EXPNO 10  
 PROCNO 1

F2 - Acquisition Parameters  
 Date\_ 20140925  
 Time 16.03  
 INSTRUM spect  
 PROBHD 5 mm PABBO BB/  
 PULPROG zg30  
 TD 65536  
 SOLVENT MeOD

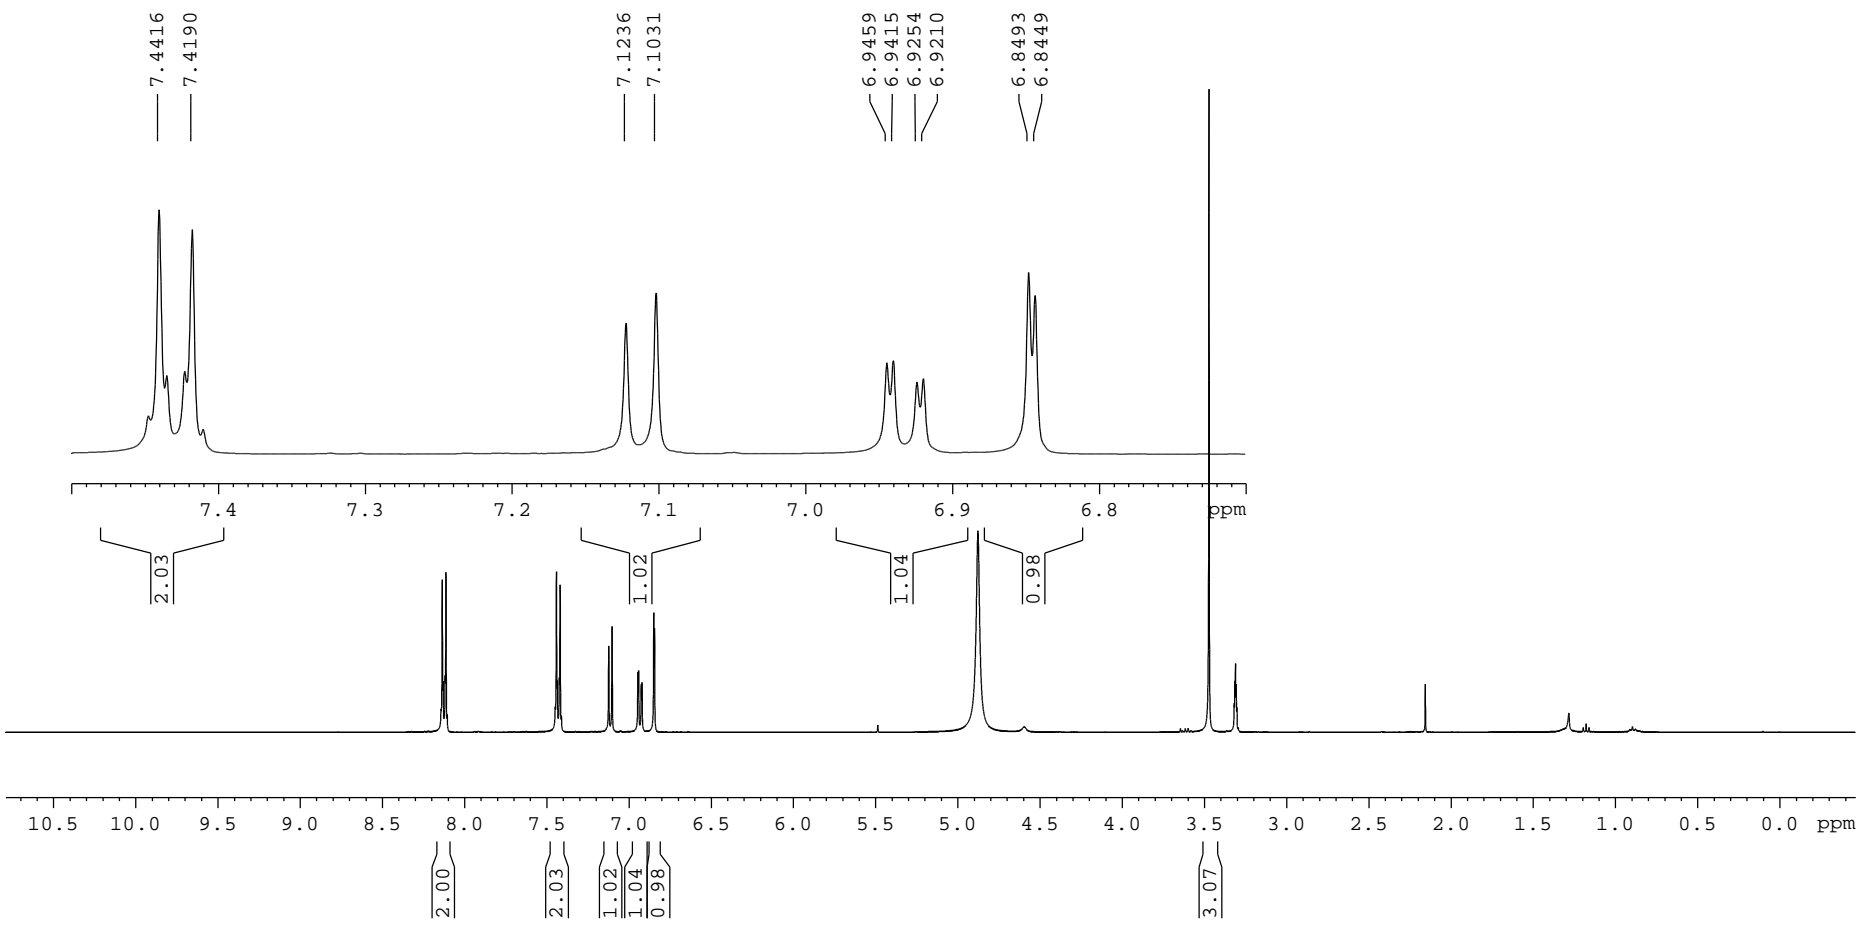

— 170.95

— 156.14

— 150.67

— 147.17

— 131.43

— 128.36

— 125.56

— 125.08

— 123.91

— 123.50

— 119.87

— 48.99

— 37.75

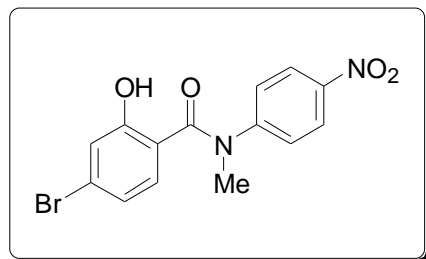

Current Data Parameters  
NAME syh-6-93-1-c  
EXPNO 10  
PROCNO 1

F2 - Acquisition Parameters  
Date\_ 20140926  
Time 0.25  
INSTRUM spect  
PROBHD 5 mm PABBO BB/  
PULPROG zgpg30  
TD 65536  
SOLVENT MeOD

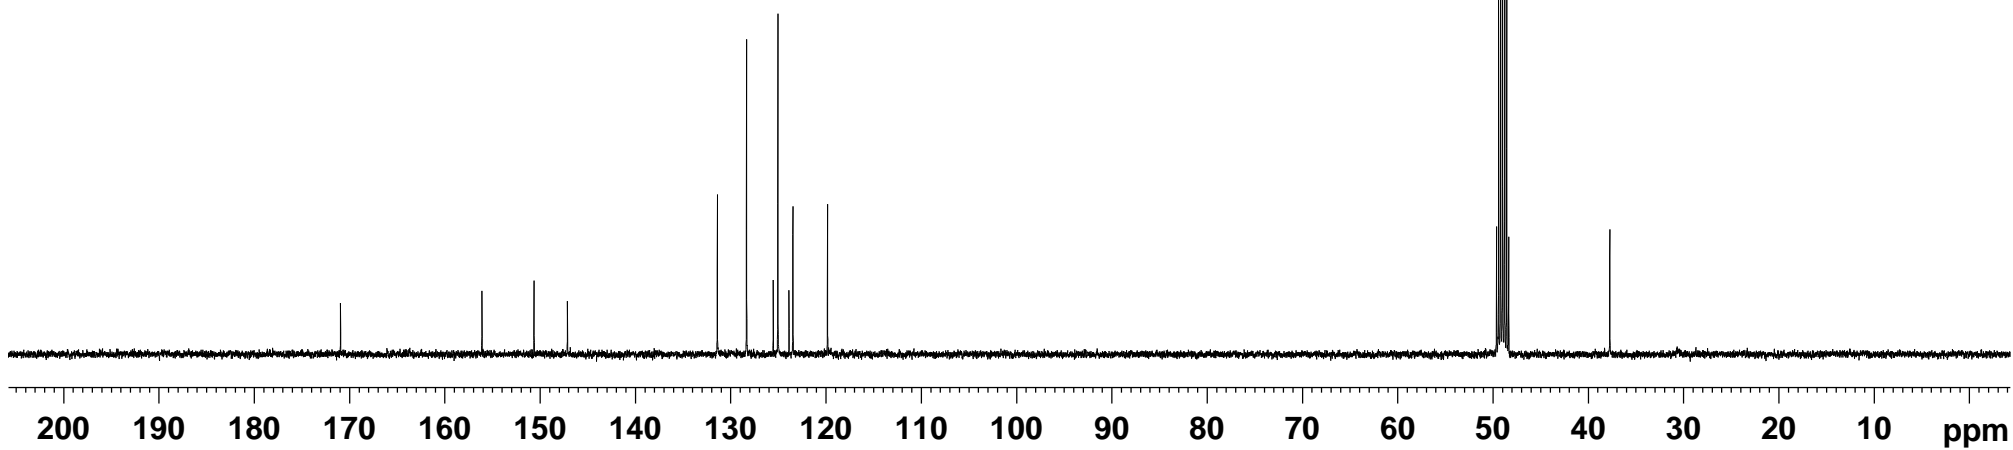

10.6692

8.2149  
8.1933  
7.2752  
7.2702  
7.2536  
6.9906  
6.9869  
6.5960  
6.5746  
6.4700  
6.4667  
6.4486  
6.4452

3.5348

Current Data Parameters  
NAME syh-6-159-2  
EXPNO 10  
PROCNO 1

F2 - Acquisition Parameters  
Date\_ 20141104  
Time 22.02  
INSTRUM spect  
PROBHD 5 mm PABBO BB/  
PULPROG zg30  
TD 65536  
SOLVENT CDCl3

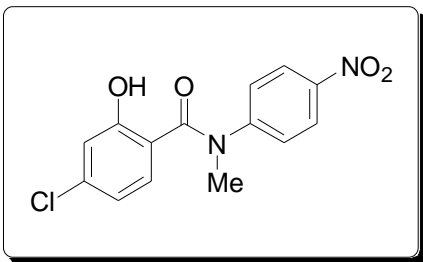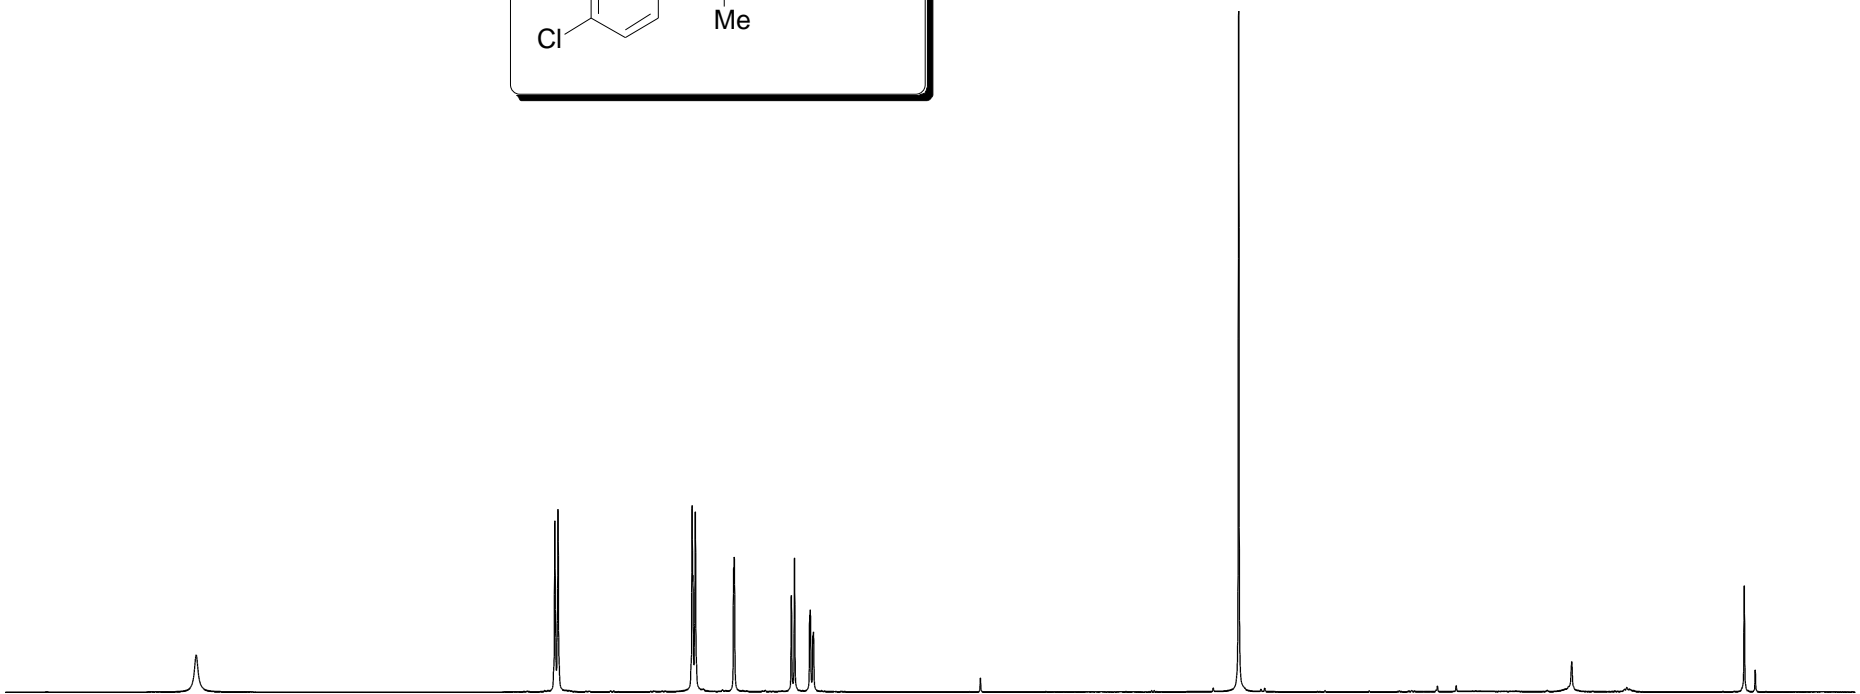

1.00

1.97

2.26

0.98

1.01

1.02

3.11

11 10 9 8 7 6 5 4 3 2 1 0 ppm

— 171.35  
 — 161.64  
 — 150.68  
 — 145.90  
 — 139.45  
 — 131.15  
 — 126.92  
 — 125.34  
 — 118.95  
 — 118.68  
 — 113.95  
 — 77.48  
 — 77.16  
 — 76.84  
 — 39.04

Current Data Parameters  
 NAME syh-6-159-2-c  
 EXPNO 10  
 PROCNO 1

F2 - Acquisition Parameters  
 Date\_ 20141105  
 Time 0.31  
 INSTRUM spect  
 PROBHD 5 mm PABBO BB/  
 PULPROG zgpg30  
 TD 65536  
 SOLVENT CDCl3

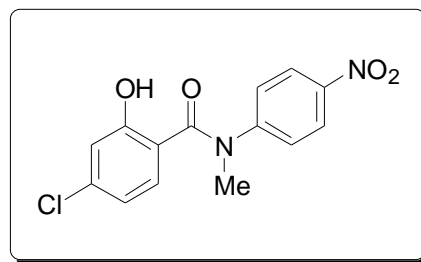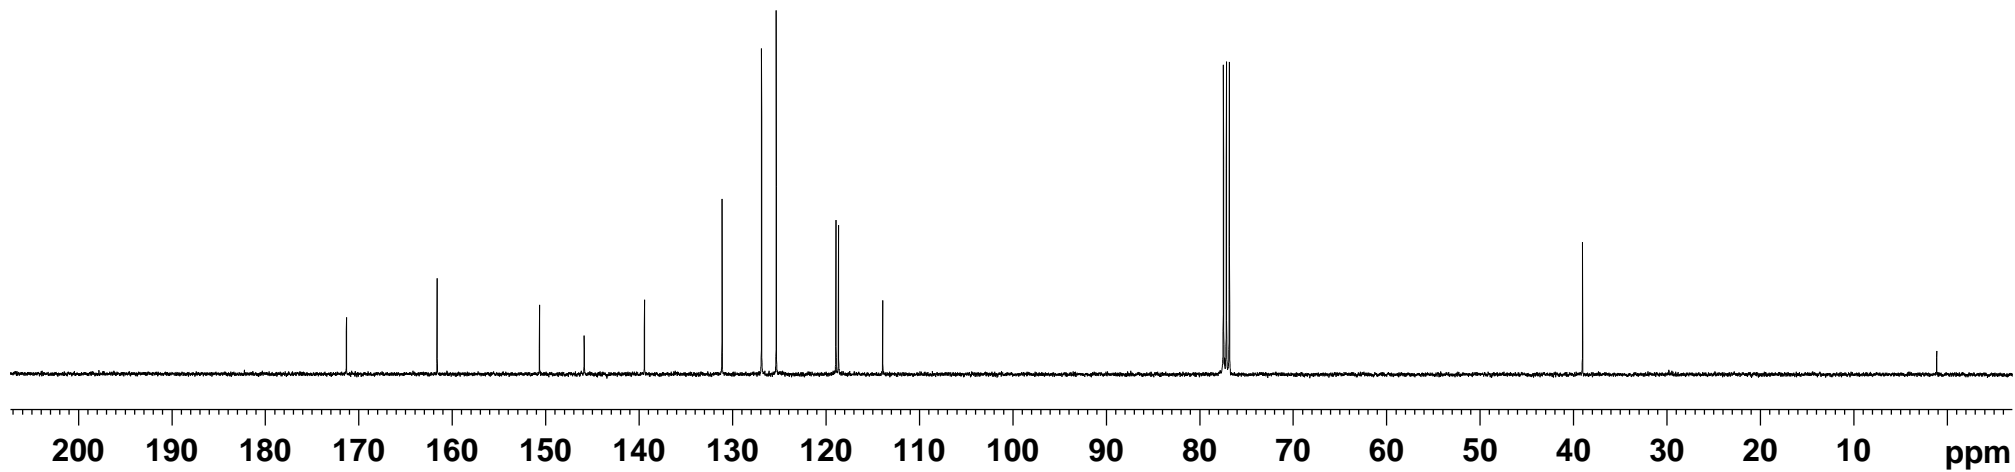

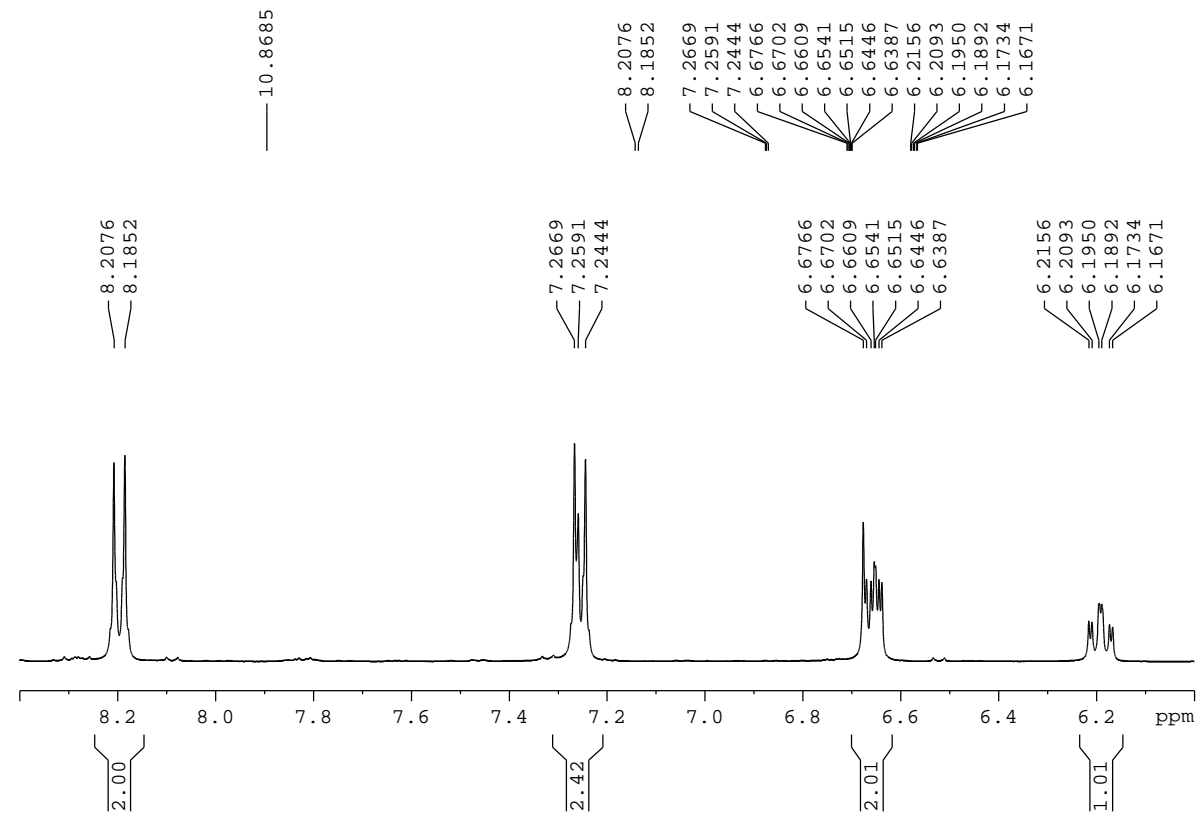

Current Data Parameters  
 NAME syh-6-133-1  
 EXPNO 10  
 PROCNO 1

F2 - Acquisition Parameters  
 Date\_ 20141023  
 Time 22.03  
 INSTRUM spect  
 PROBHD 5 mm PABBO BB/  
 PULPROG zg30  
 TD 65536  
 SOLVENT CDCl3

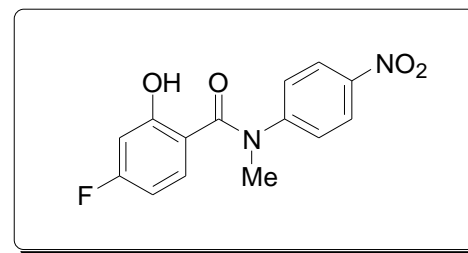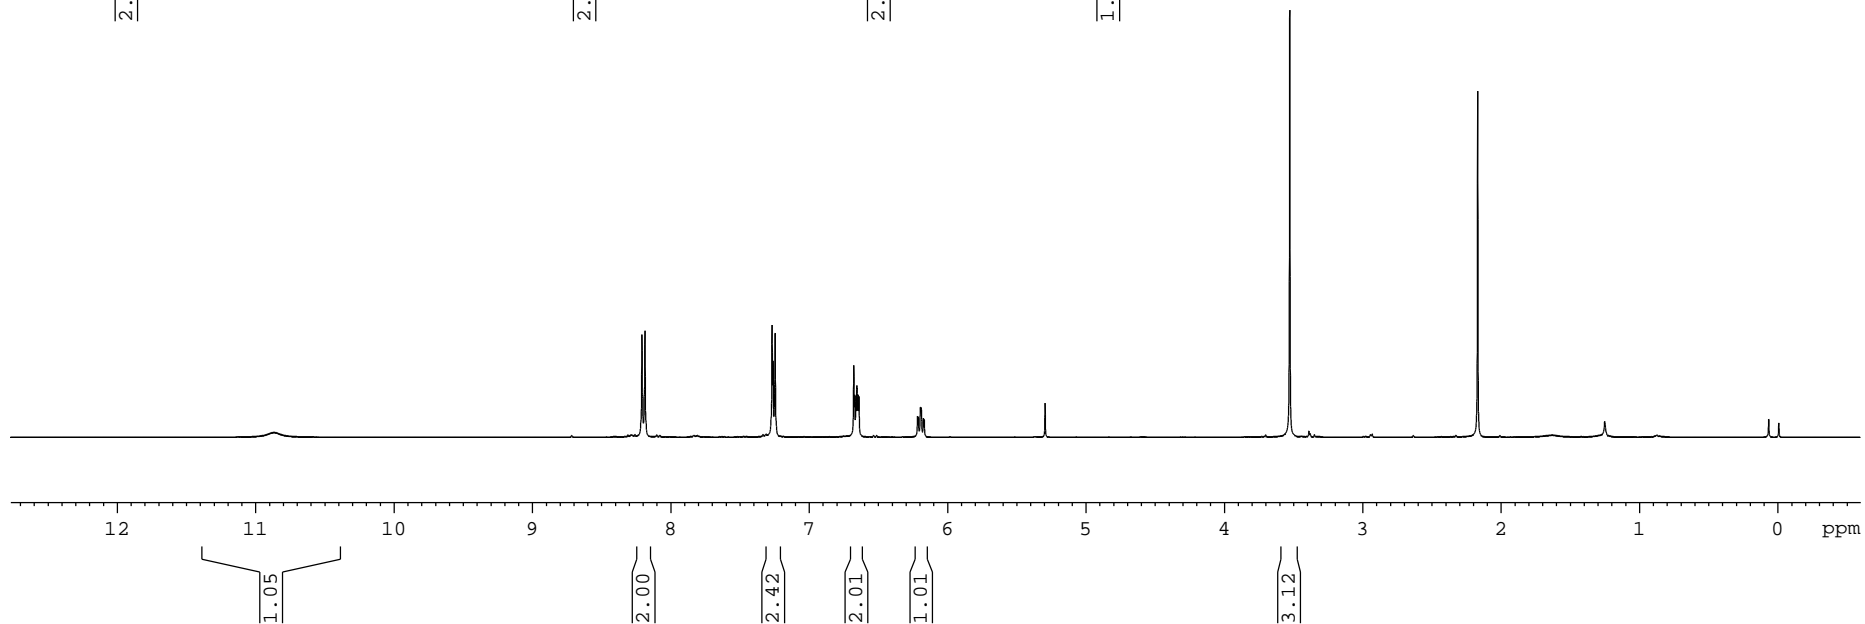

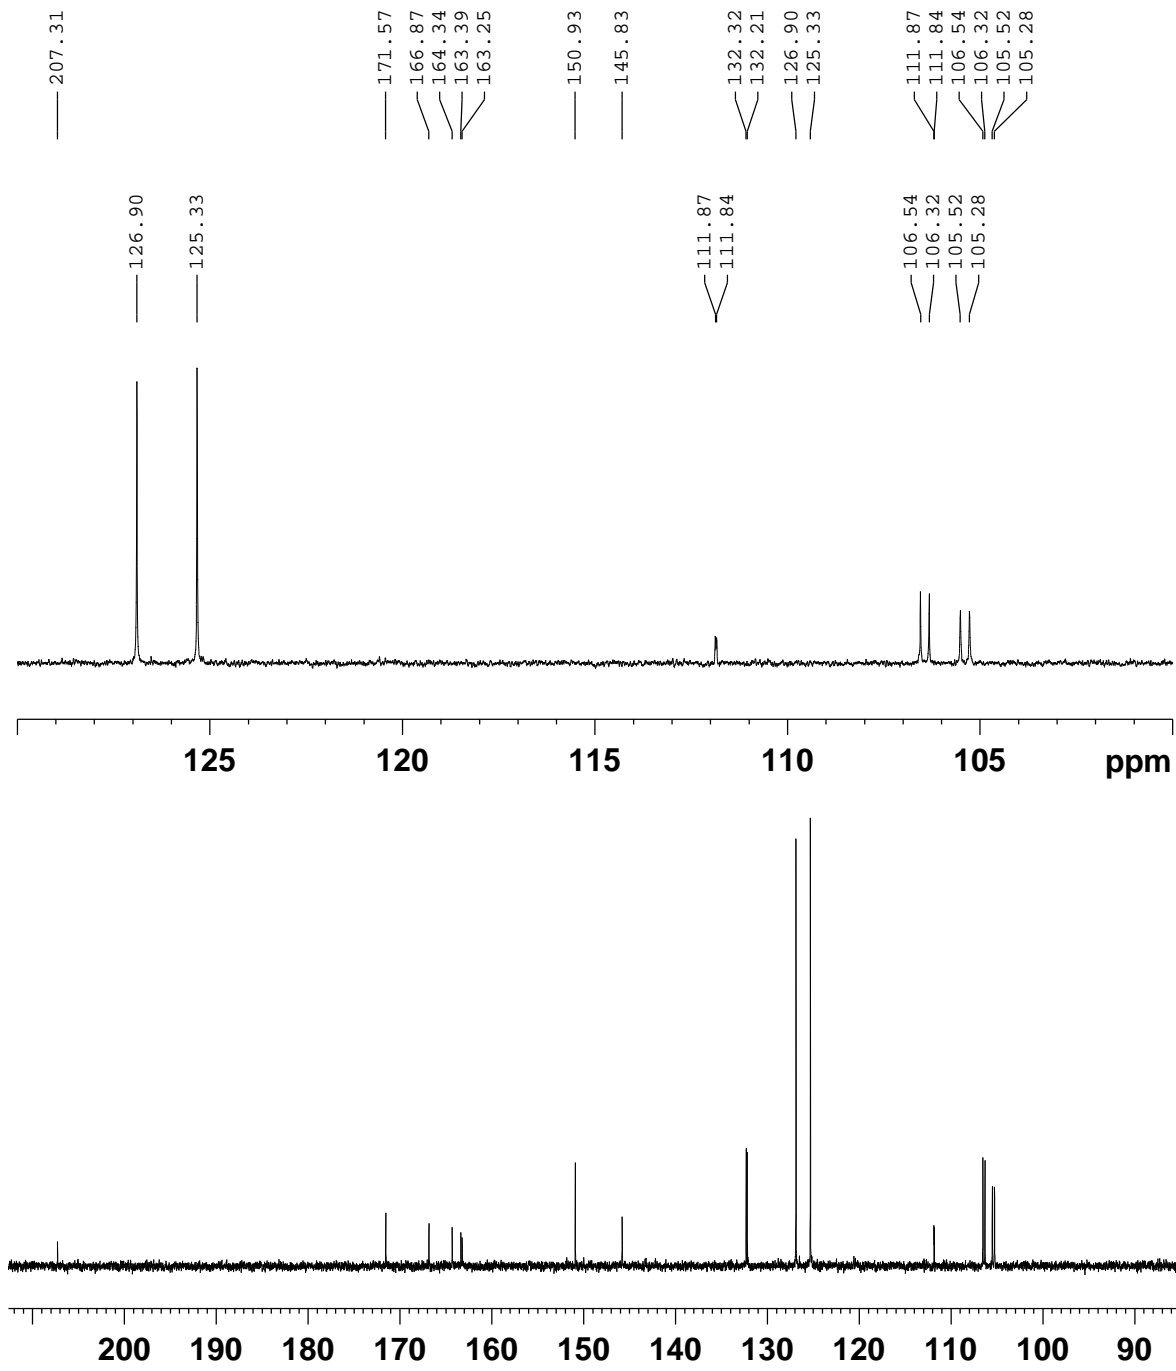

Current Data Parameters  
 NAME syh-6-133-1-c  
 EXPNO 10  
 PROCNO 1

F2 - Acquisition Parameters  
 Date\_ 20141025  
 Time 0.42  
 INSTRUM spect  
 PROBHD 5 mm PABBO BB/  
 PULPROG zgpg30  
 TD 65536  
 SOLVENT CDCl3

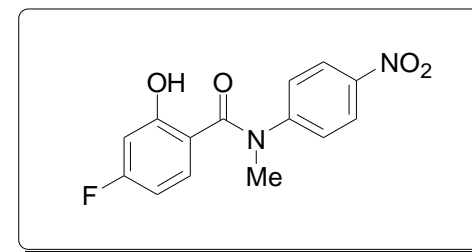



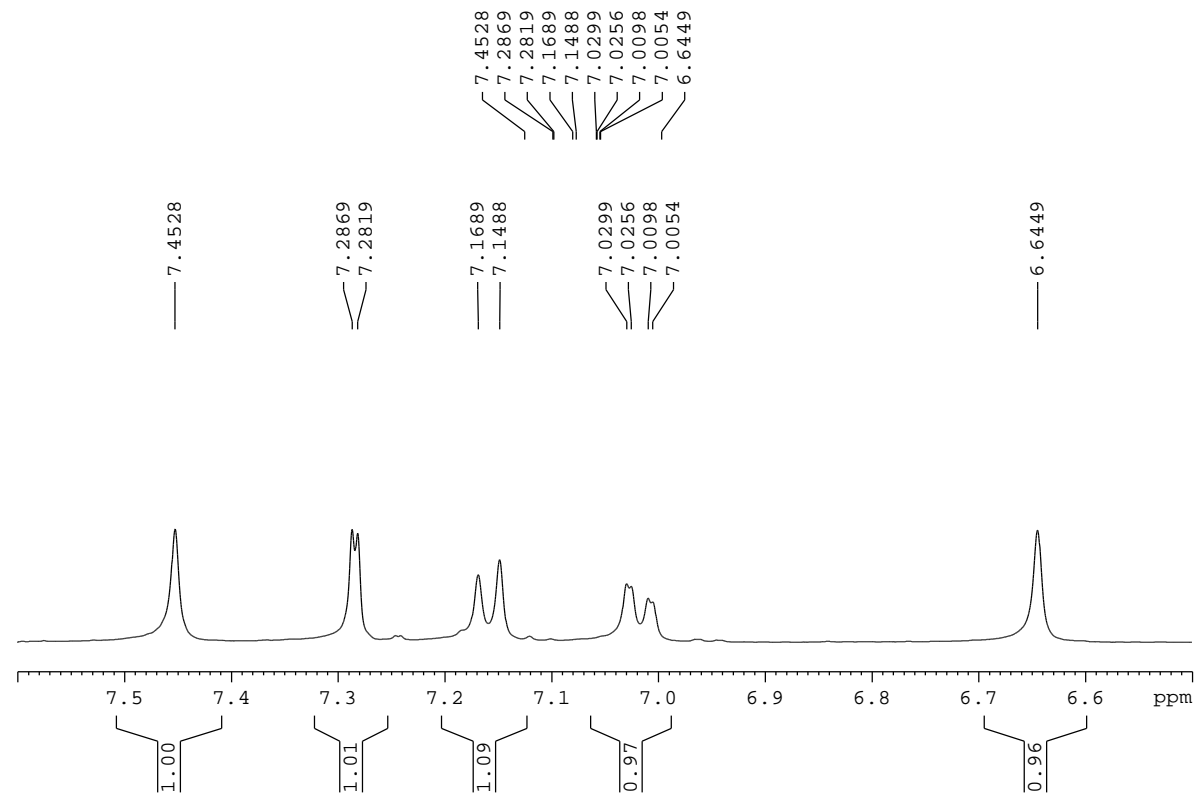

Current Data Parameters  
 NAME syh-6-57-1-1  
 EXPNO 10  
 PROCNO 1

F2 - Acquisition Parameters  
 Date\_ 20140911  
 Time 11.38  
 INSTRUM spect  
 PROBHD 5 mm PABBO BB/  
 PULPROG zg30  
 TD 65536  
 SOLVENT MeOD

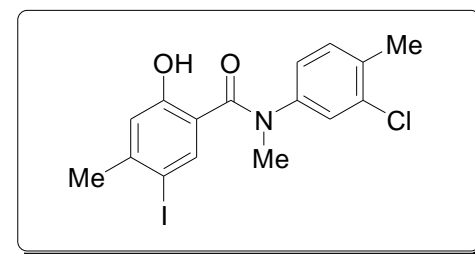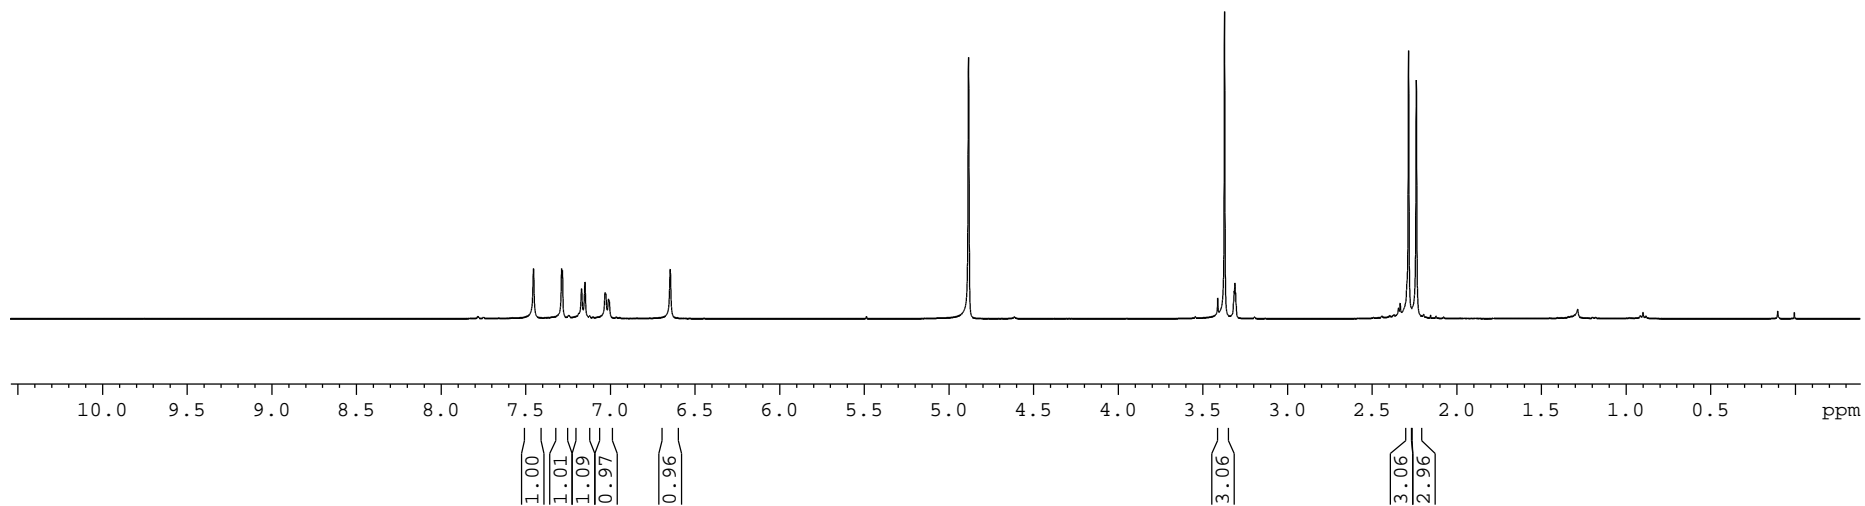

— 170.35  
— 155.88  
— 145.32  
— 143.87  
— 139.41  
— 136.26  
— 135.06  
— 132.13  
— 128.37  
— 126.45  
— 124.40  
— 118.24

— 87.26

— 48.98

— 38.21

— 28.12

— 19.60

Current Data Parameters  
NAME syh-6-57-1-1-c  
EXPNO 10  
PROCNO 1

F2 - Acquisition Parameters  
Date\_ 20140911  
Time 15.01  
INSTRUM spect  
PROBHD 5 mm PABBO BB/  
PULPROG zgpg30  
TD 65536  
SOLVENT MeOD

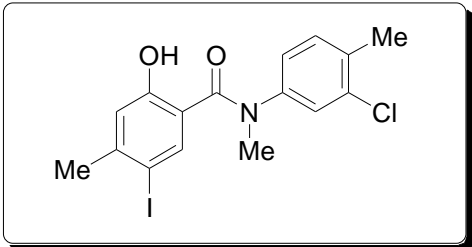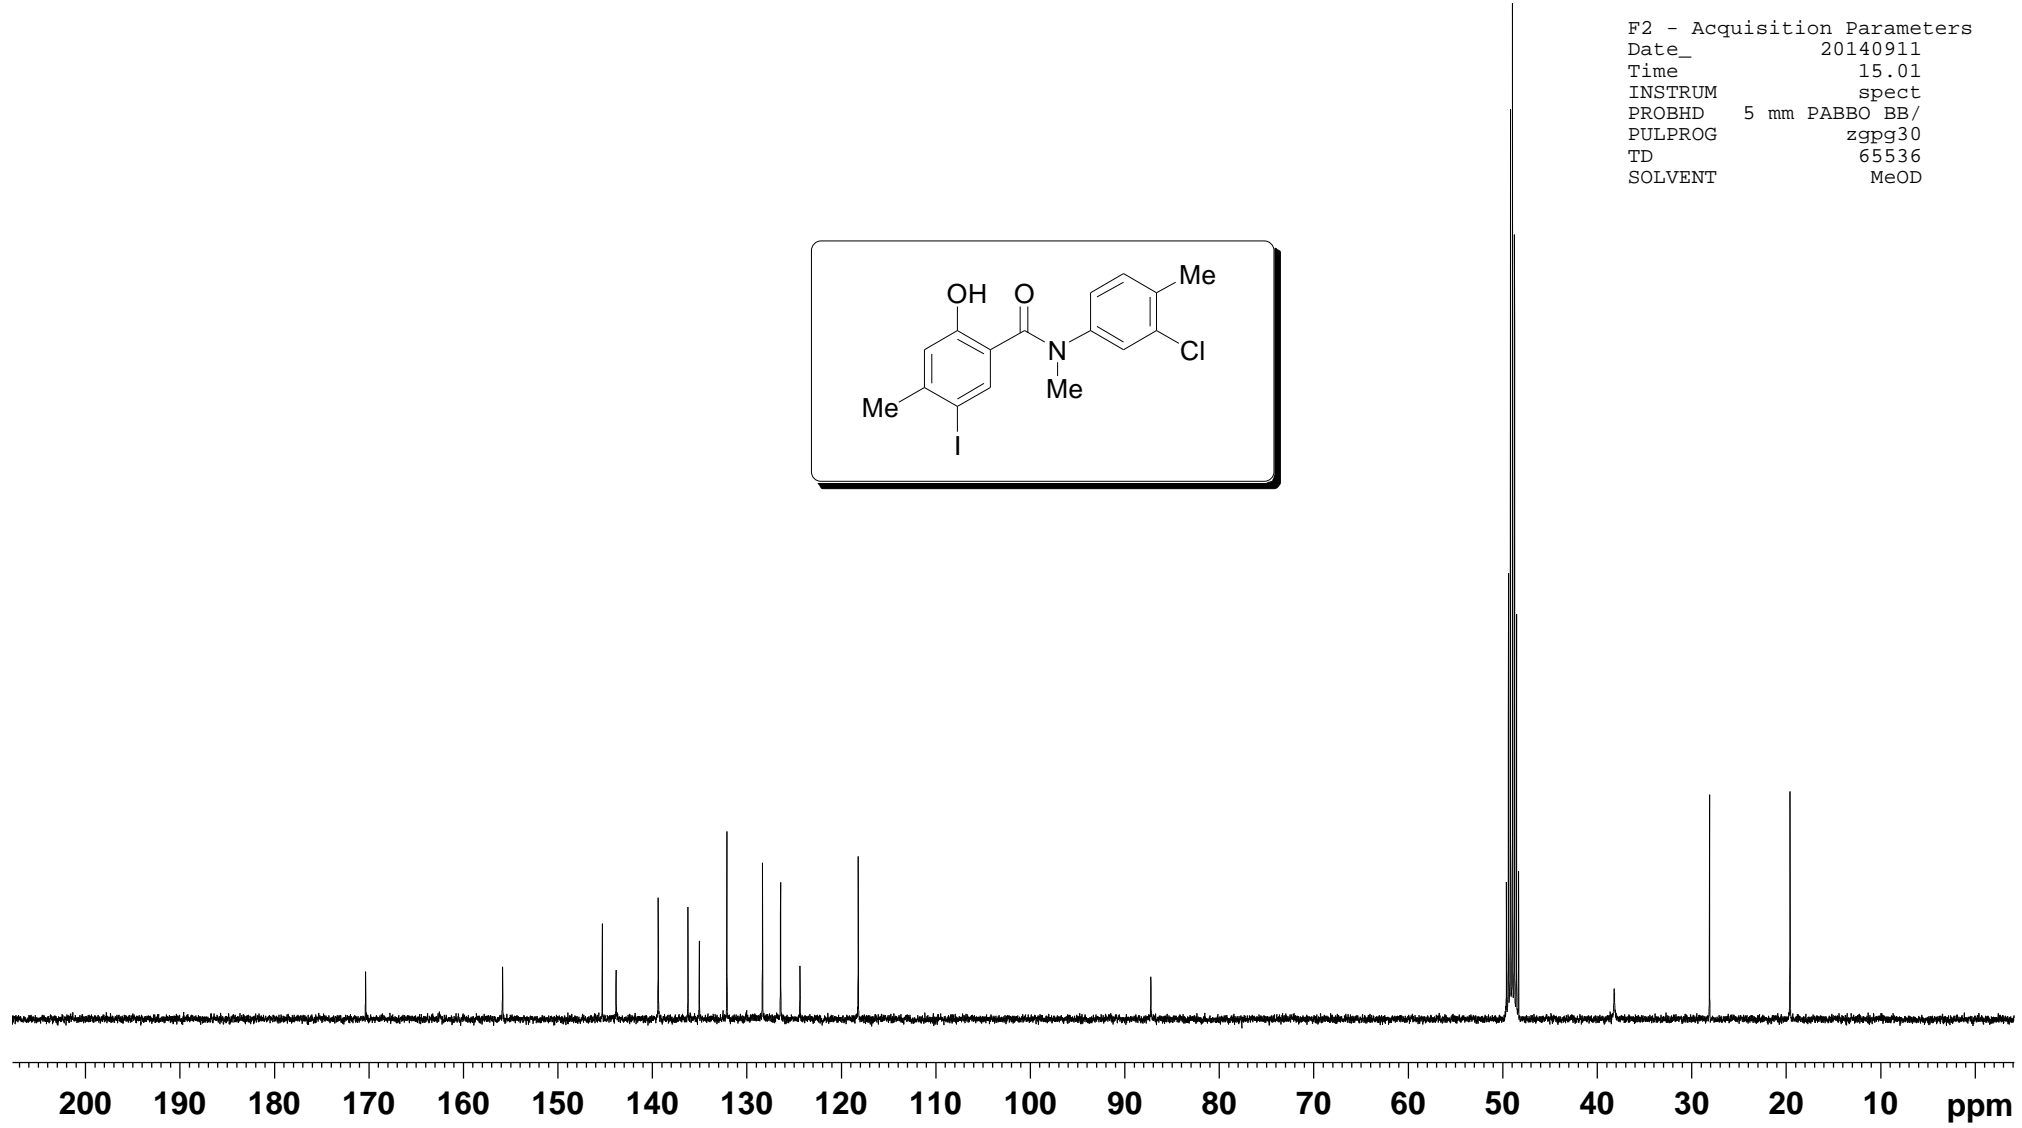

200 190 180 170 160 150 140 130 120 110 100 90 80 70 60 50 40 30 20 10 ppm

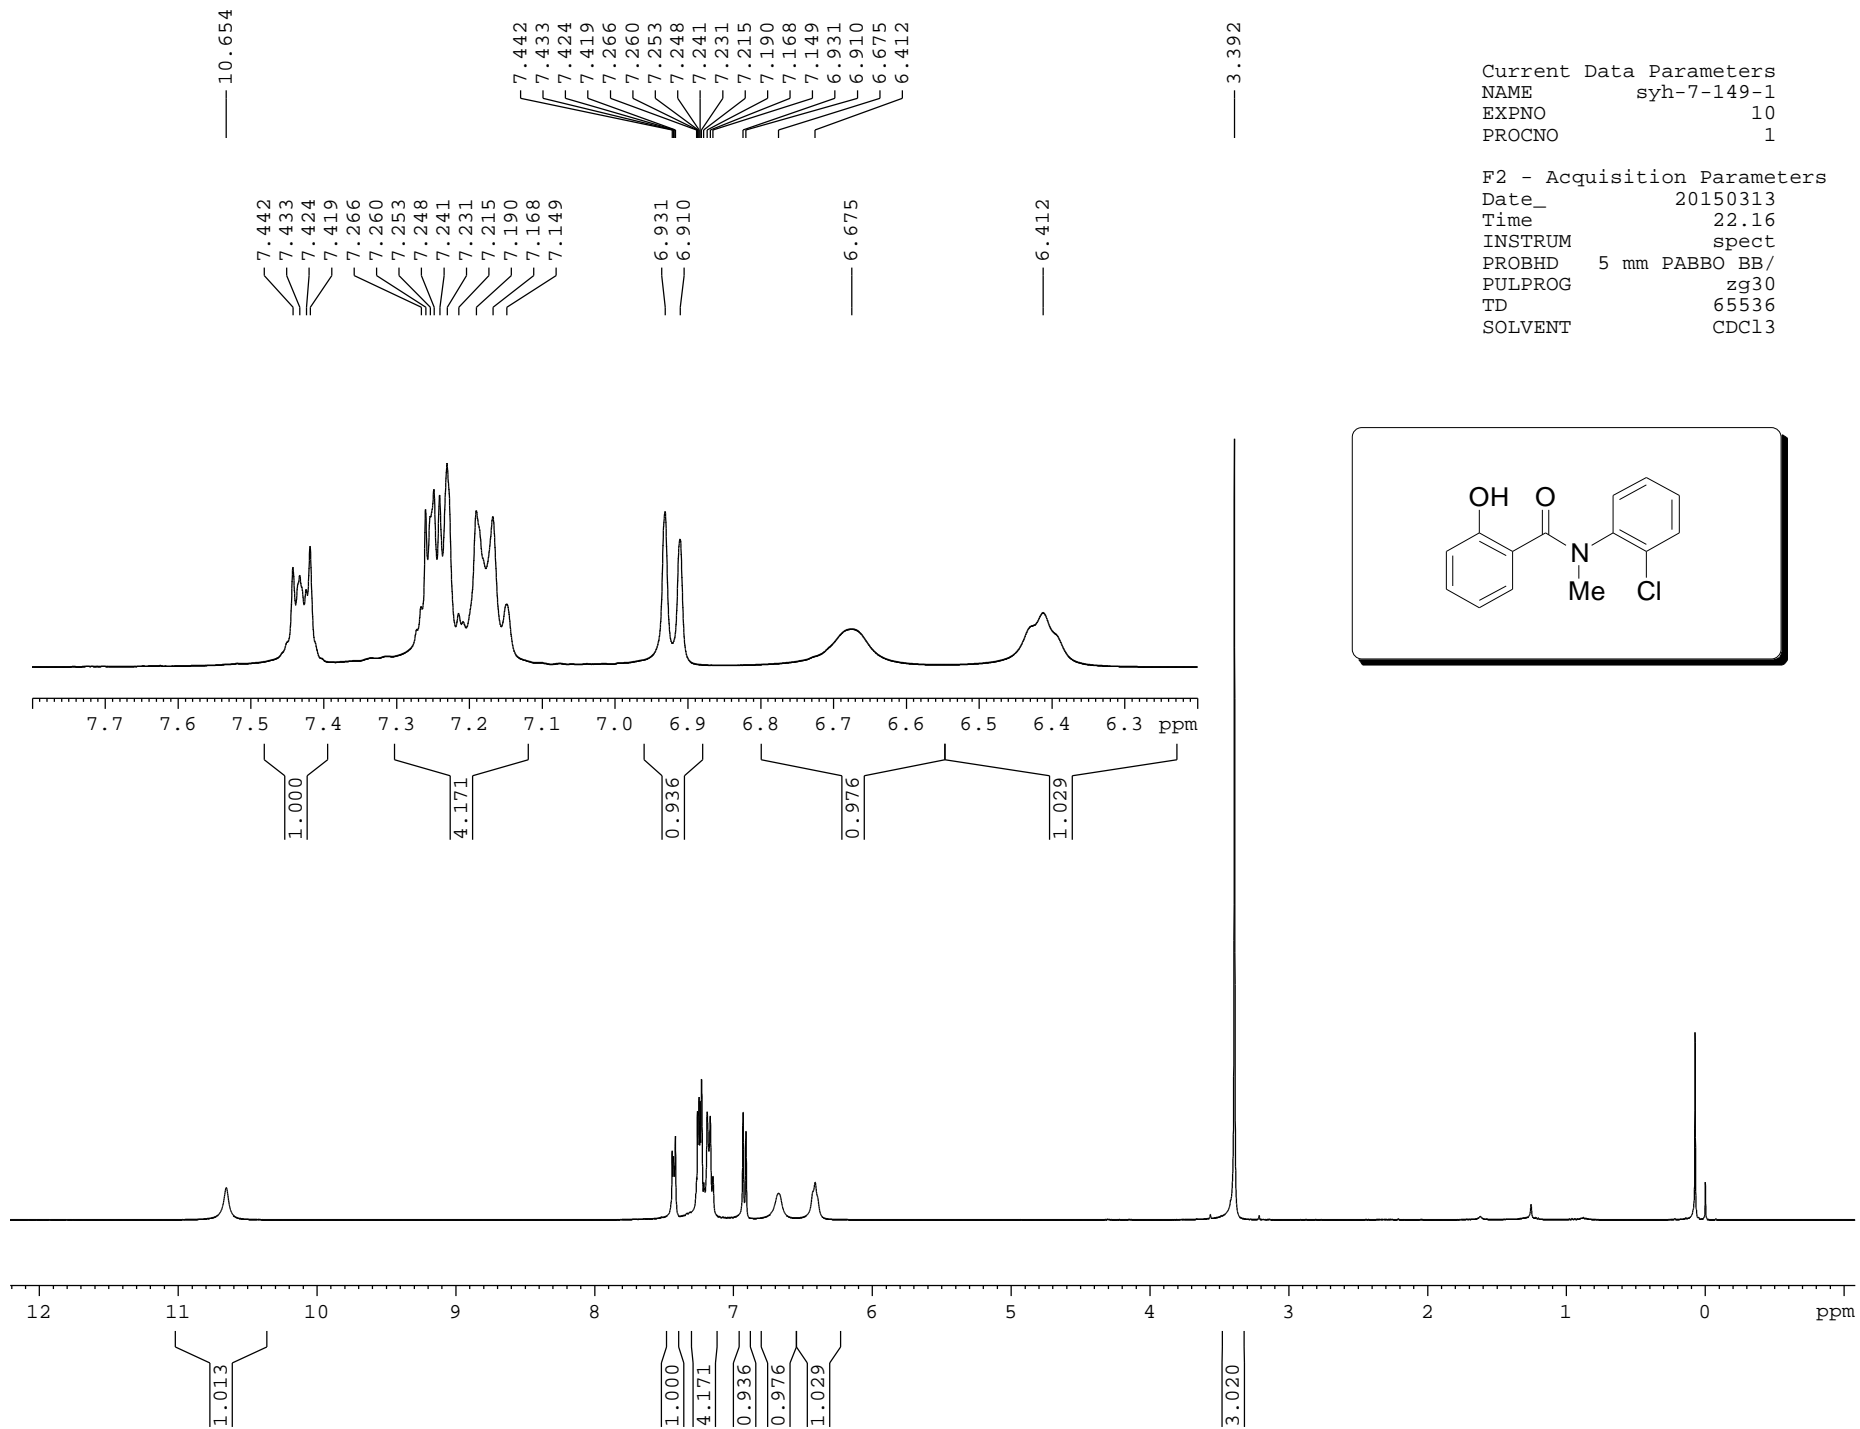

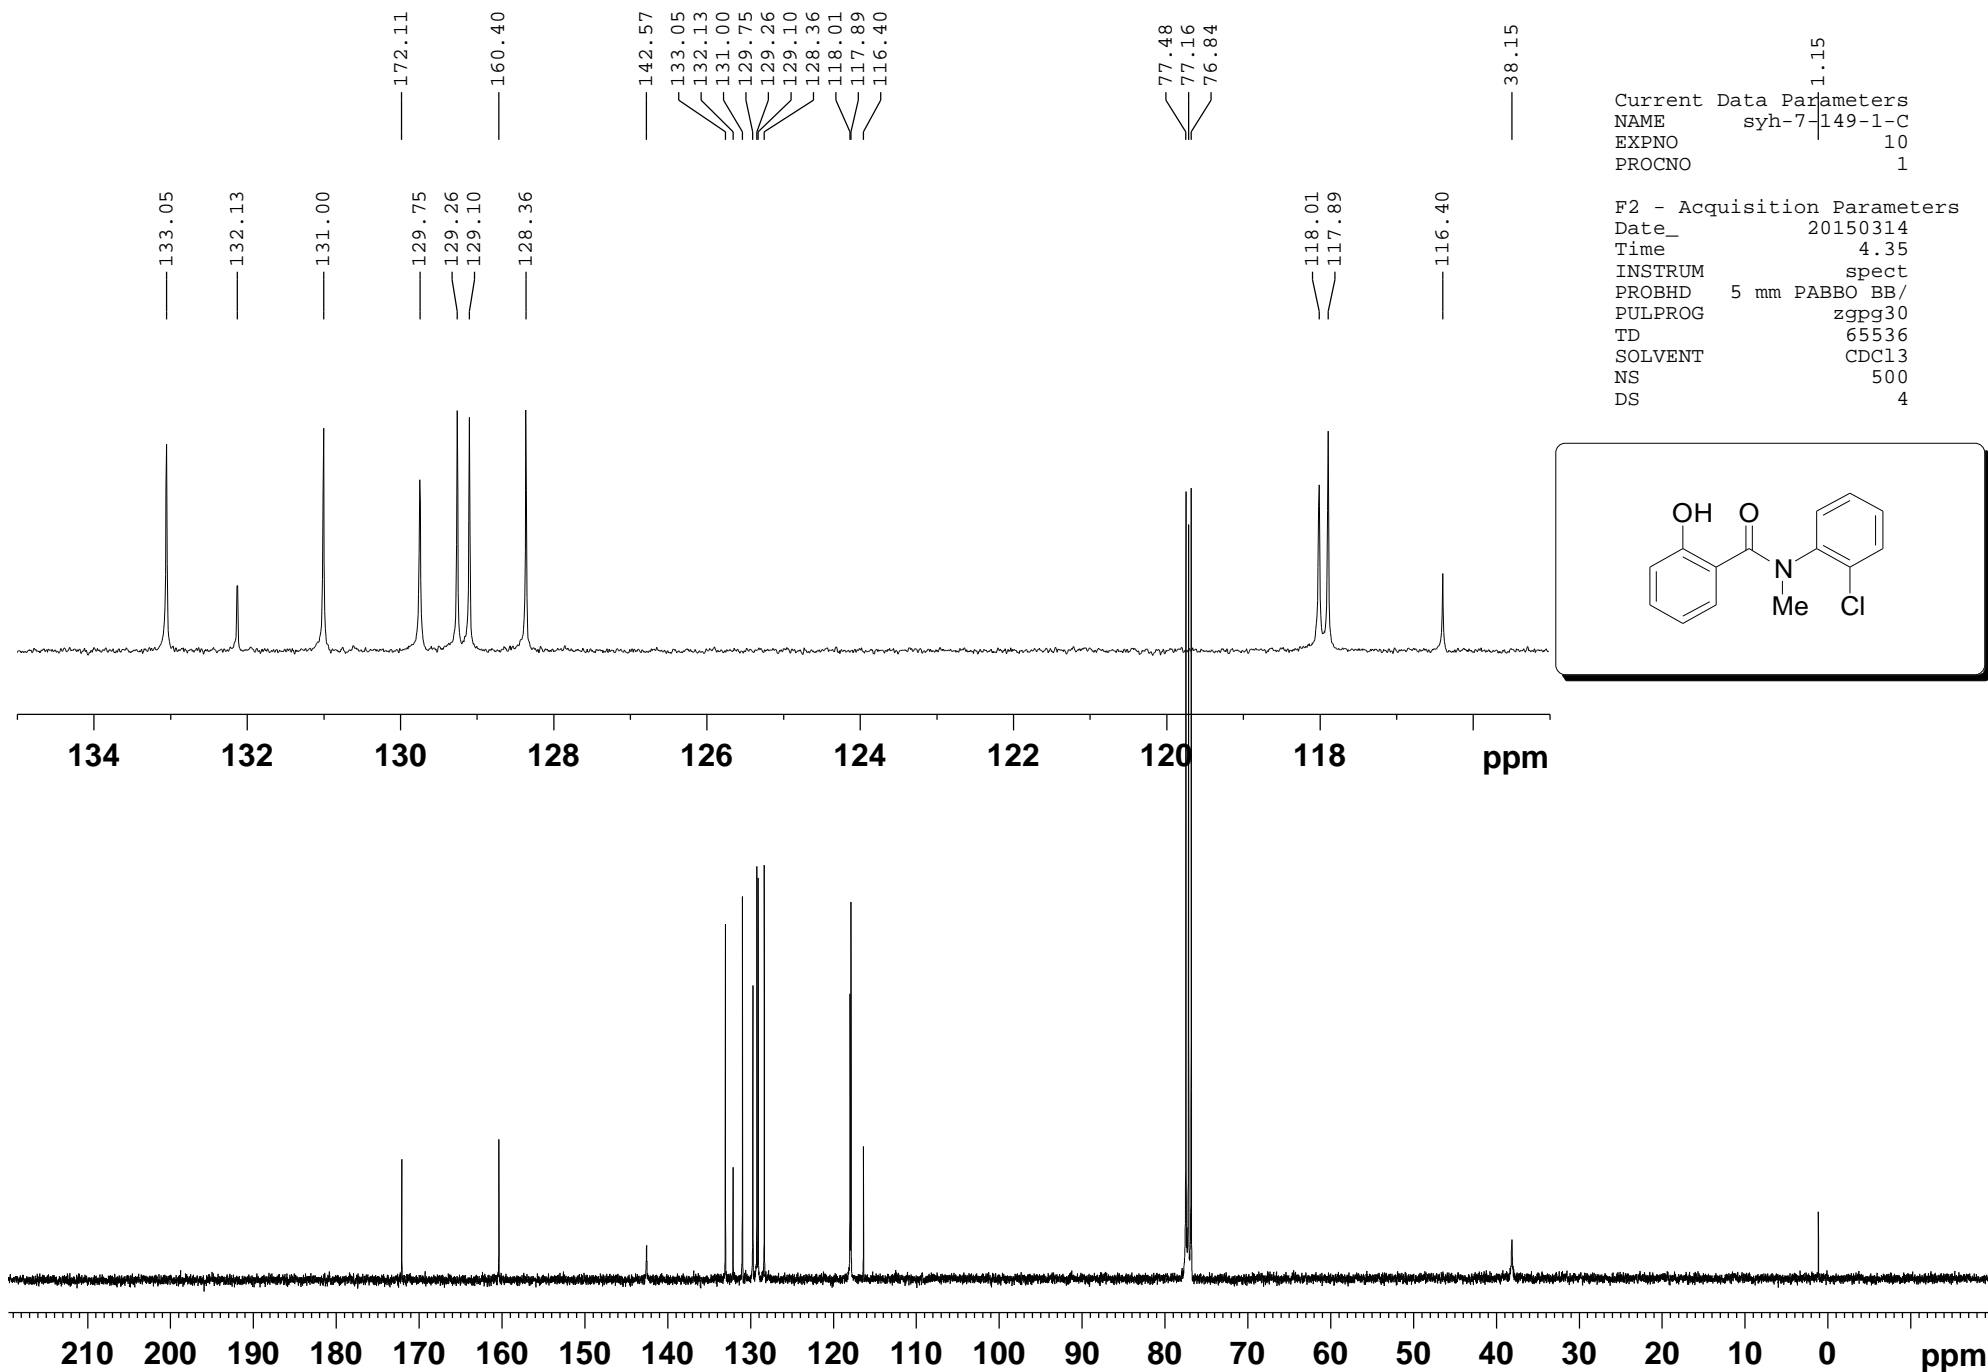

Current Data Parameters  
 NAME syh-7-149-1-C  
 EXPNO 10  
 PROCNO 1

F2 - Acquisition Parameters  
 Date\_ 20150314  
 Time 4.35  
 INSTRUM spect  
 PROBHD 5 mm PABBO BB/  
 PULPROG zgpg30  
 TD 65536  
 SOLVENT CDCl3  
 NS 500  
 DS 4

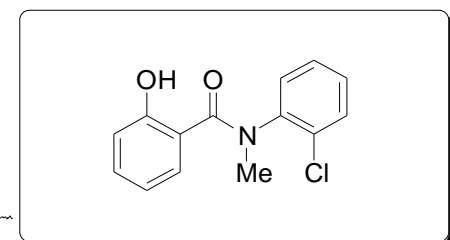

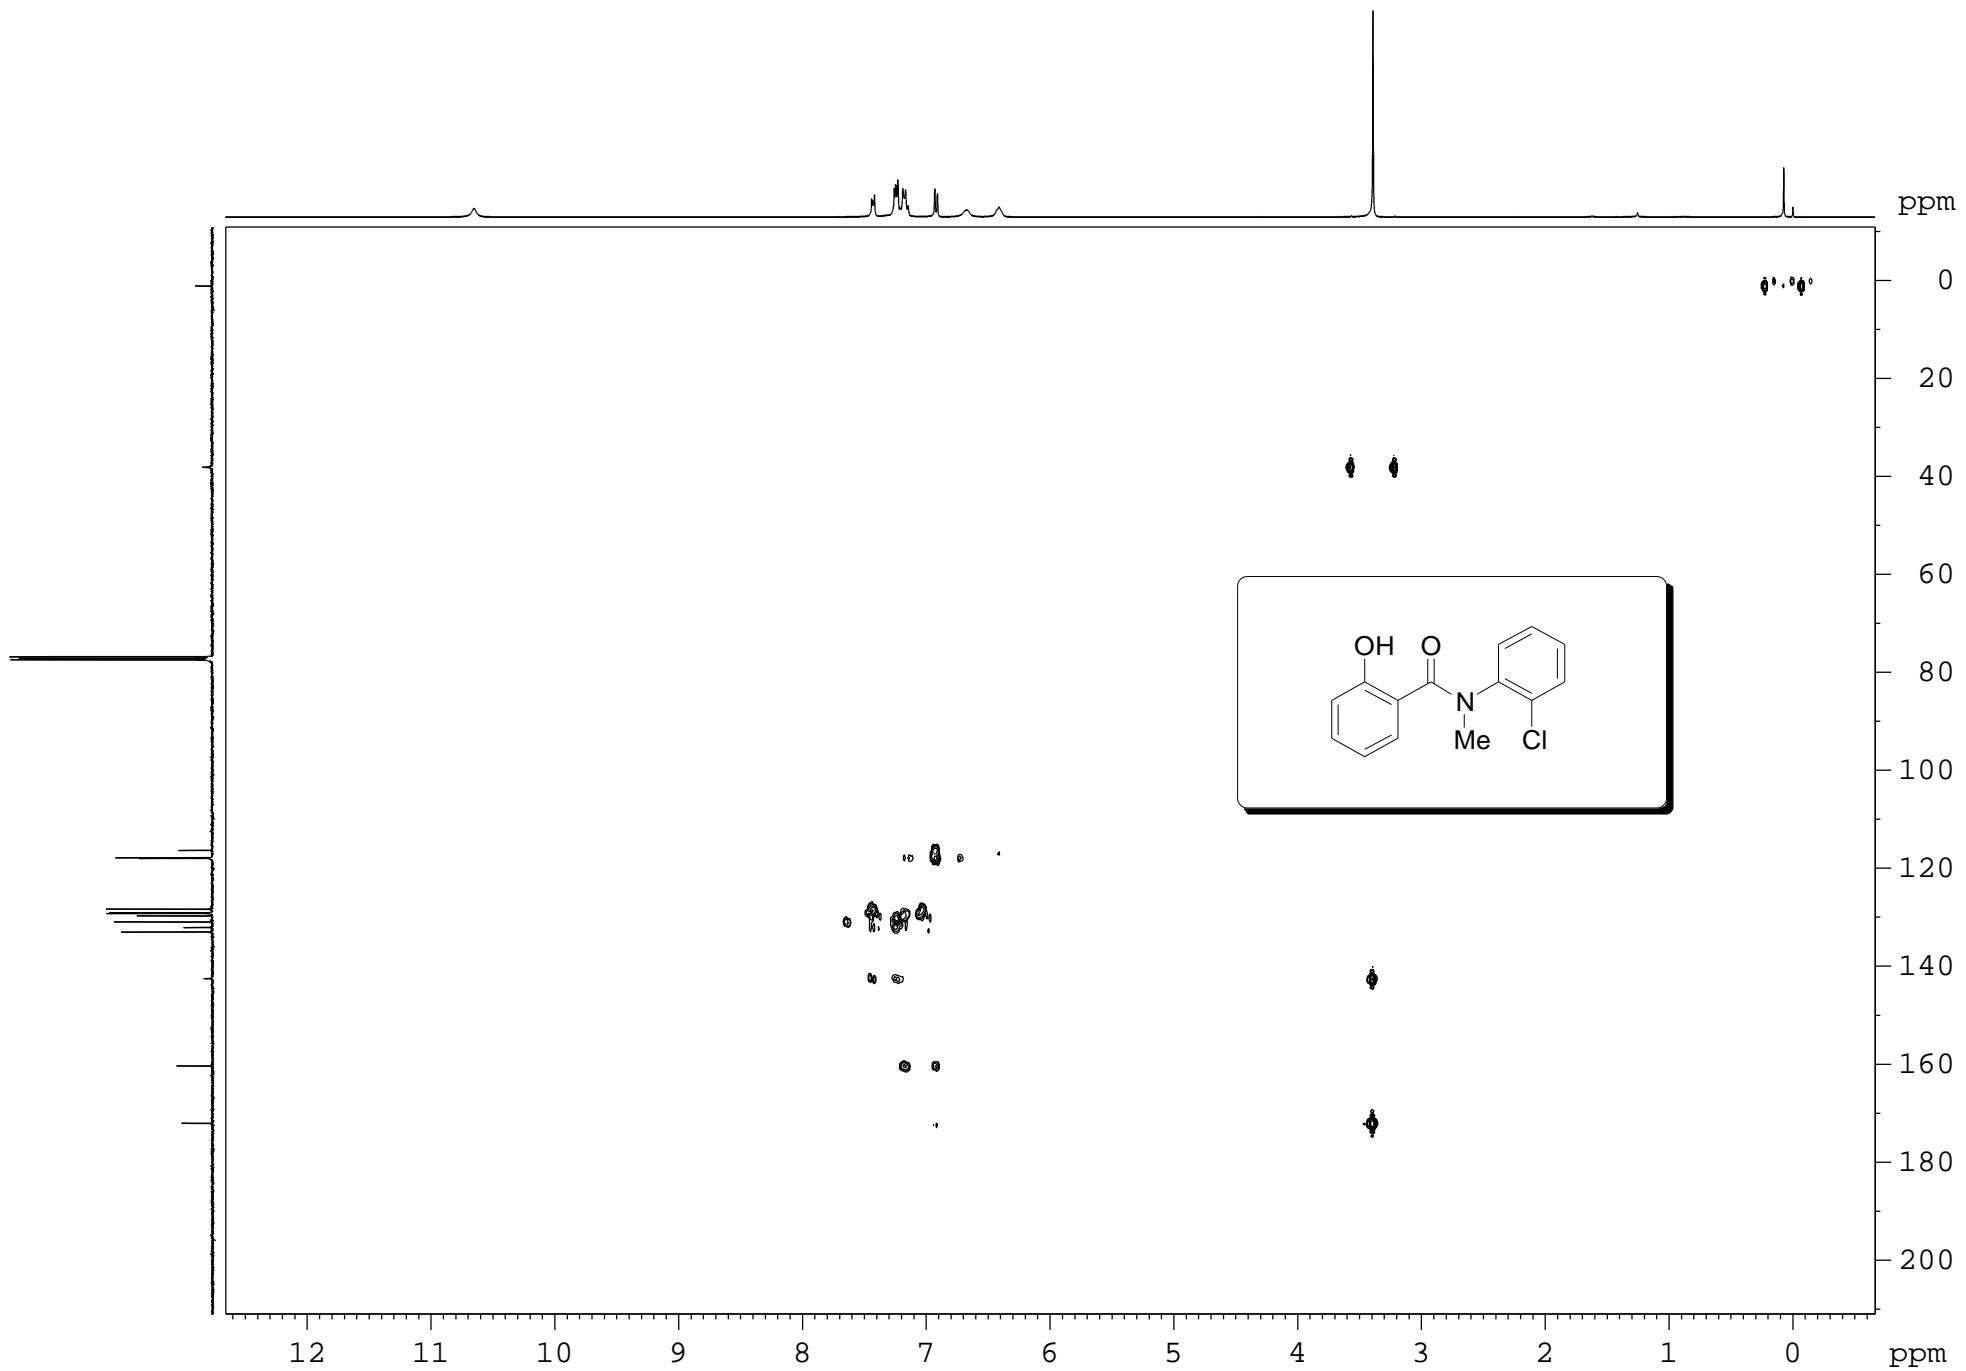

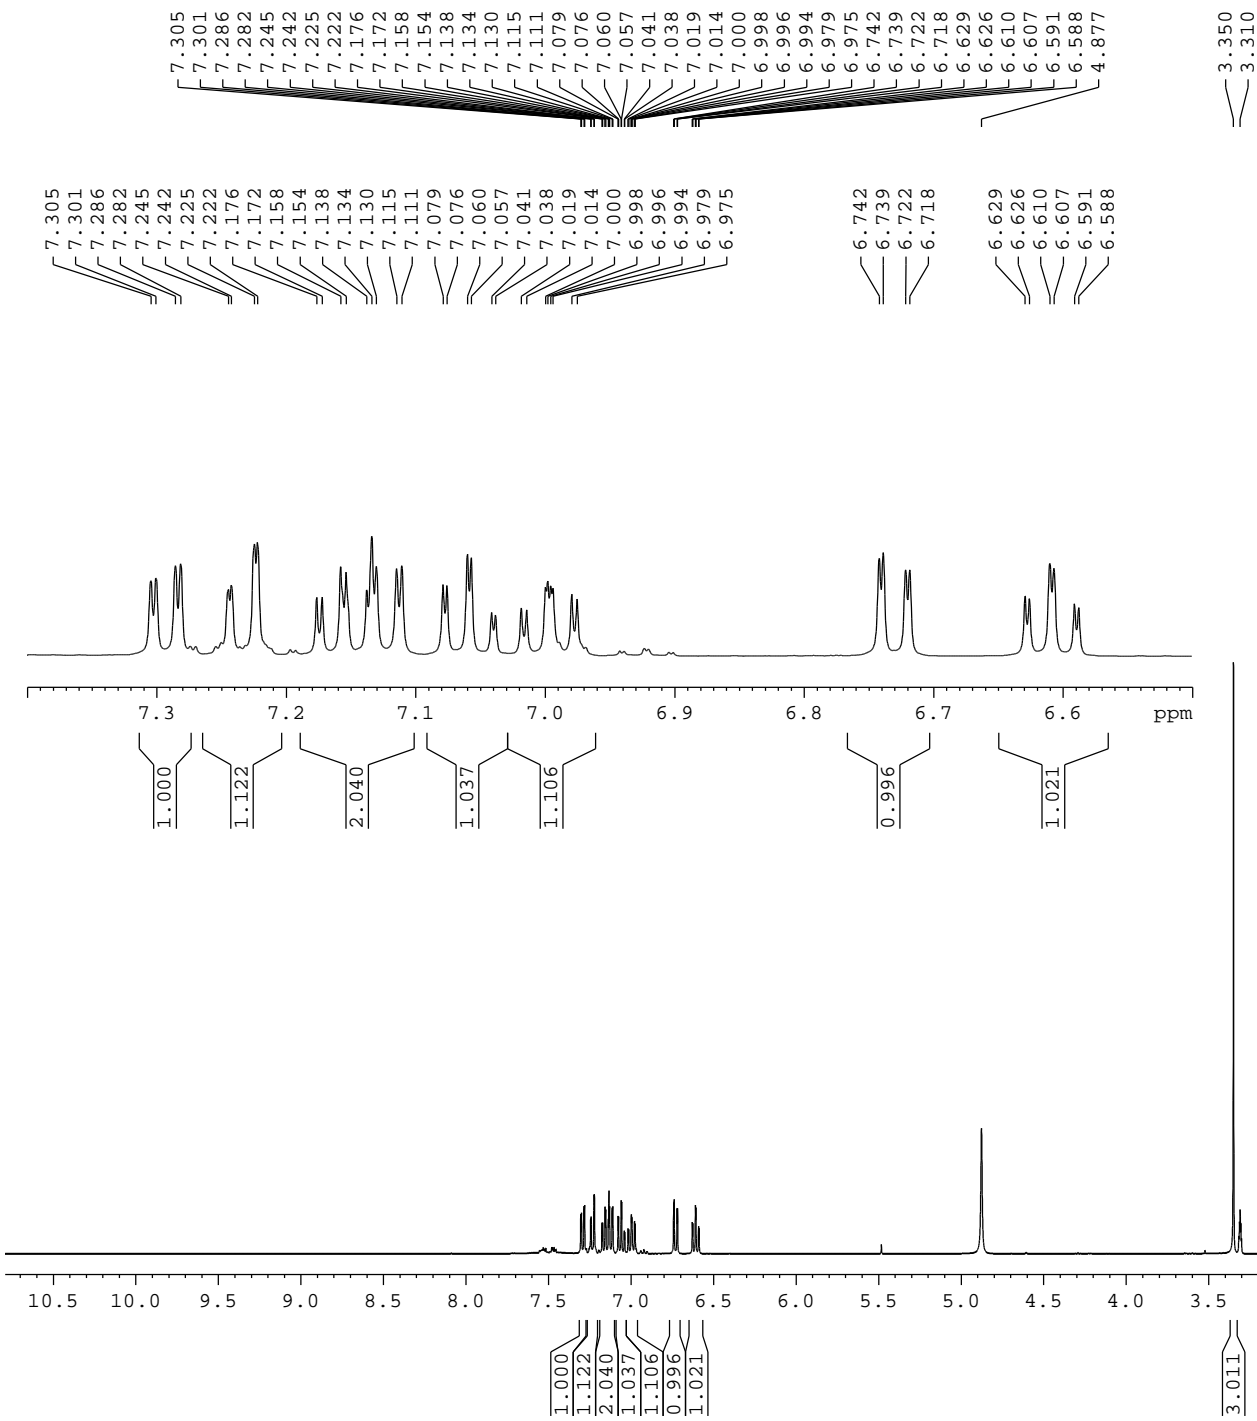

Current Data Parameters  
 NAME syh-7-151-2  
 EXPNO 10  
 PROCNO 1

F2 - Acquisition Parameters  
 Date\_ 20150314  
 Time 21.49  
 INSTRUM spect  
 PROBHD 5 mm PABBO BB/  
 PULPROG zg30  
 TD 65536  
 SOLVENT MeOD

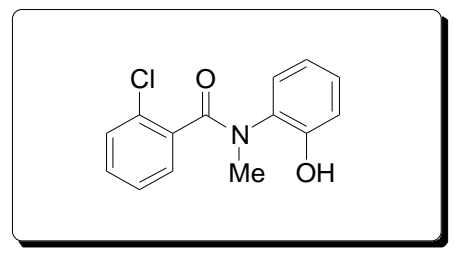

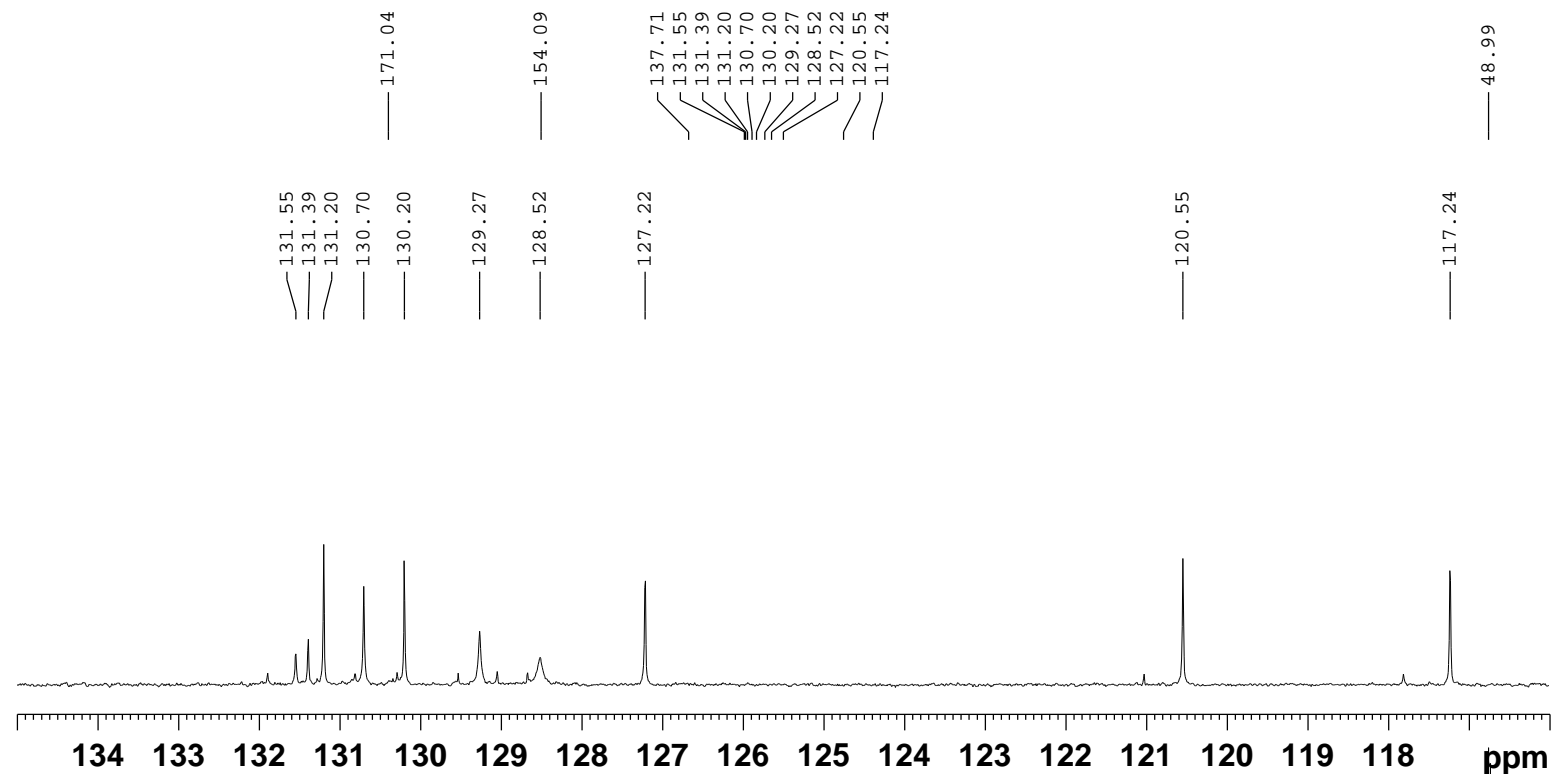

Current Data Parameters  
 NAME syh-7-151-2-c  
 EXPNO 10  
 PROCNO 1

F2 - Acquisition Parameters  
 Date\_ 20150315  
 Time 9.05  
 INSTRUM spect  
 PROBHD 5 mm PABBO BB/  
 PULPROG zgpg30  
 TD 65536  
 SOLVENT MeOD  
 NS 500  
 DS 4

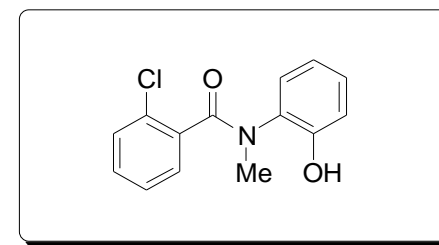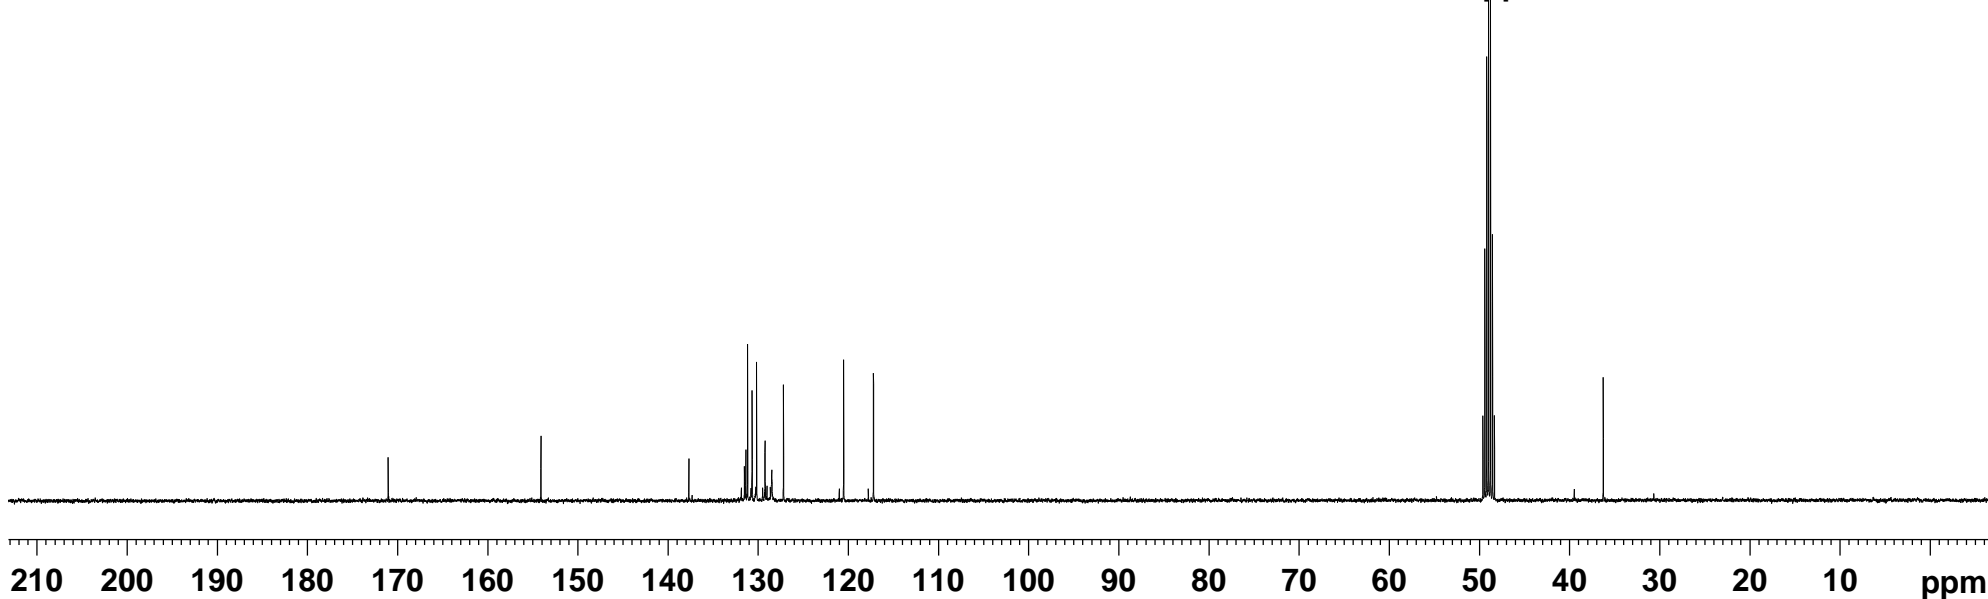

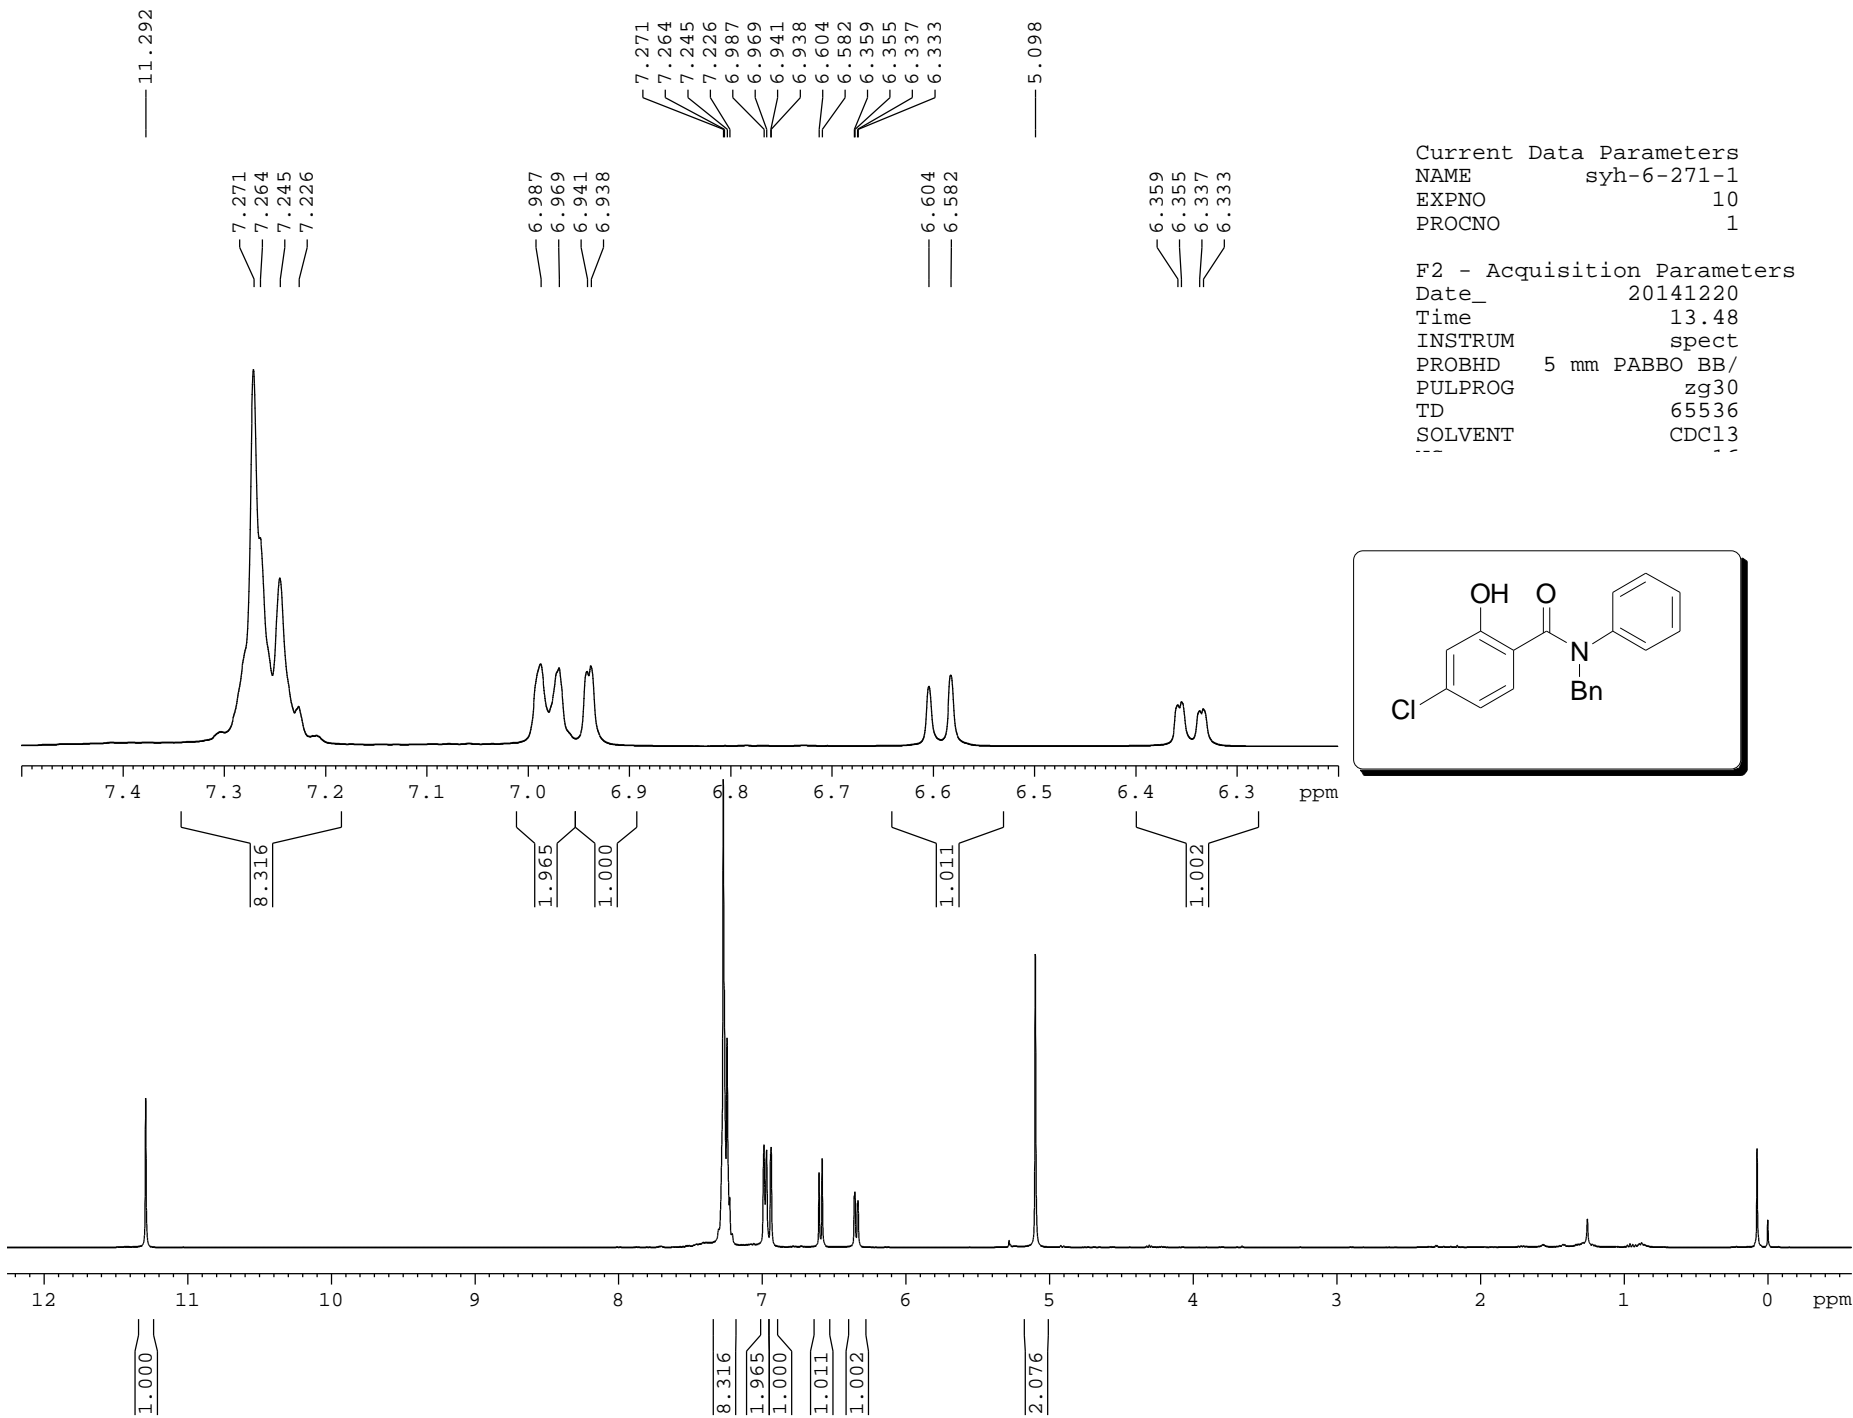



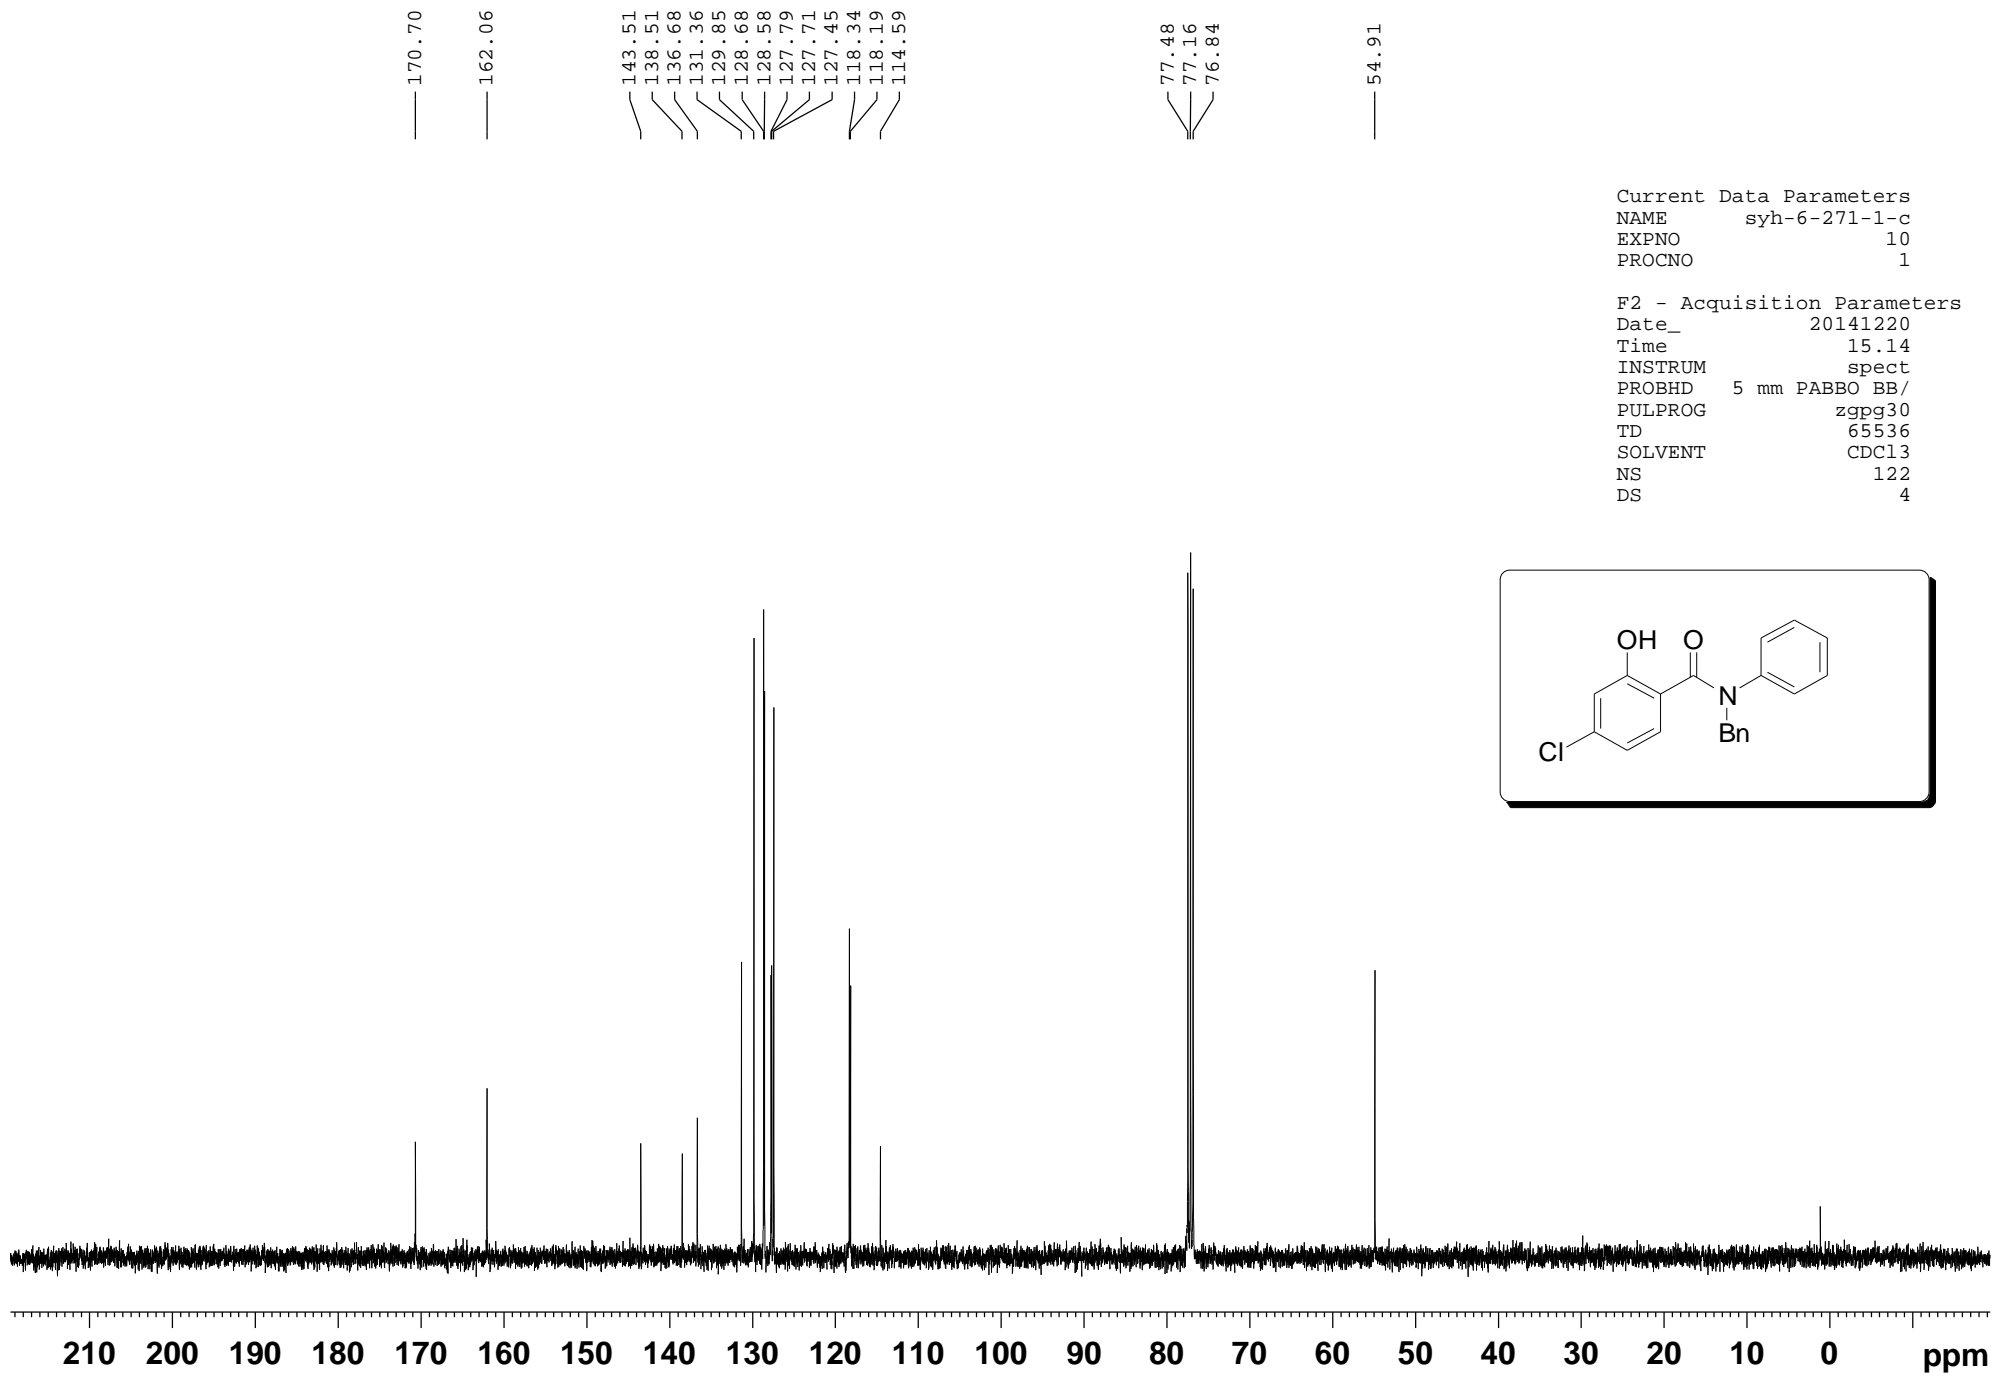

Current Data Parameters  
 NAME syh-6-271-1-c  
 EXPNO 10  
 PROCNO 1

F2 - Acquisition Parameters  
 Date\_ 20141220  
 Time 15.14  
 INSTRUM spect  
 PROBHD 5 mm PABBO BB/  
 PULPROG zgpg30  
 TD 65536  
 SOLVENT CDCl3  
 NS 122  
 DS 4

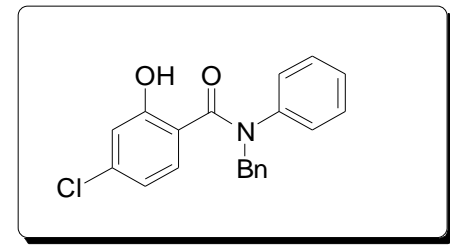

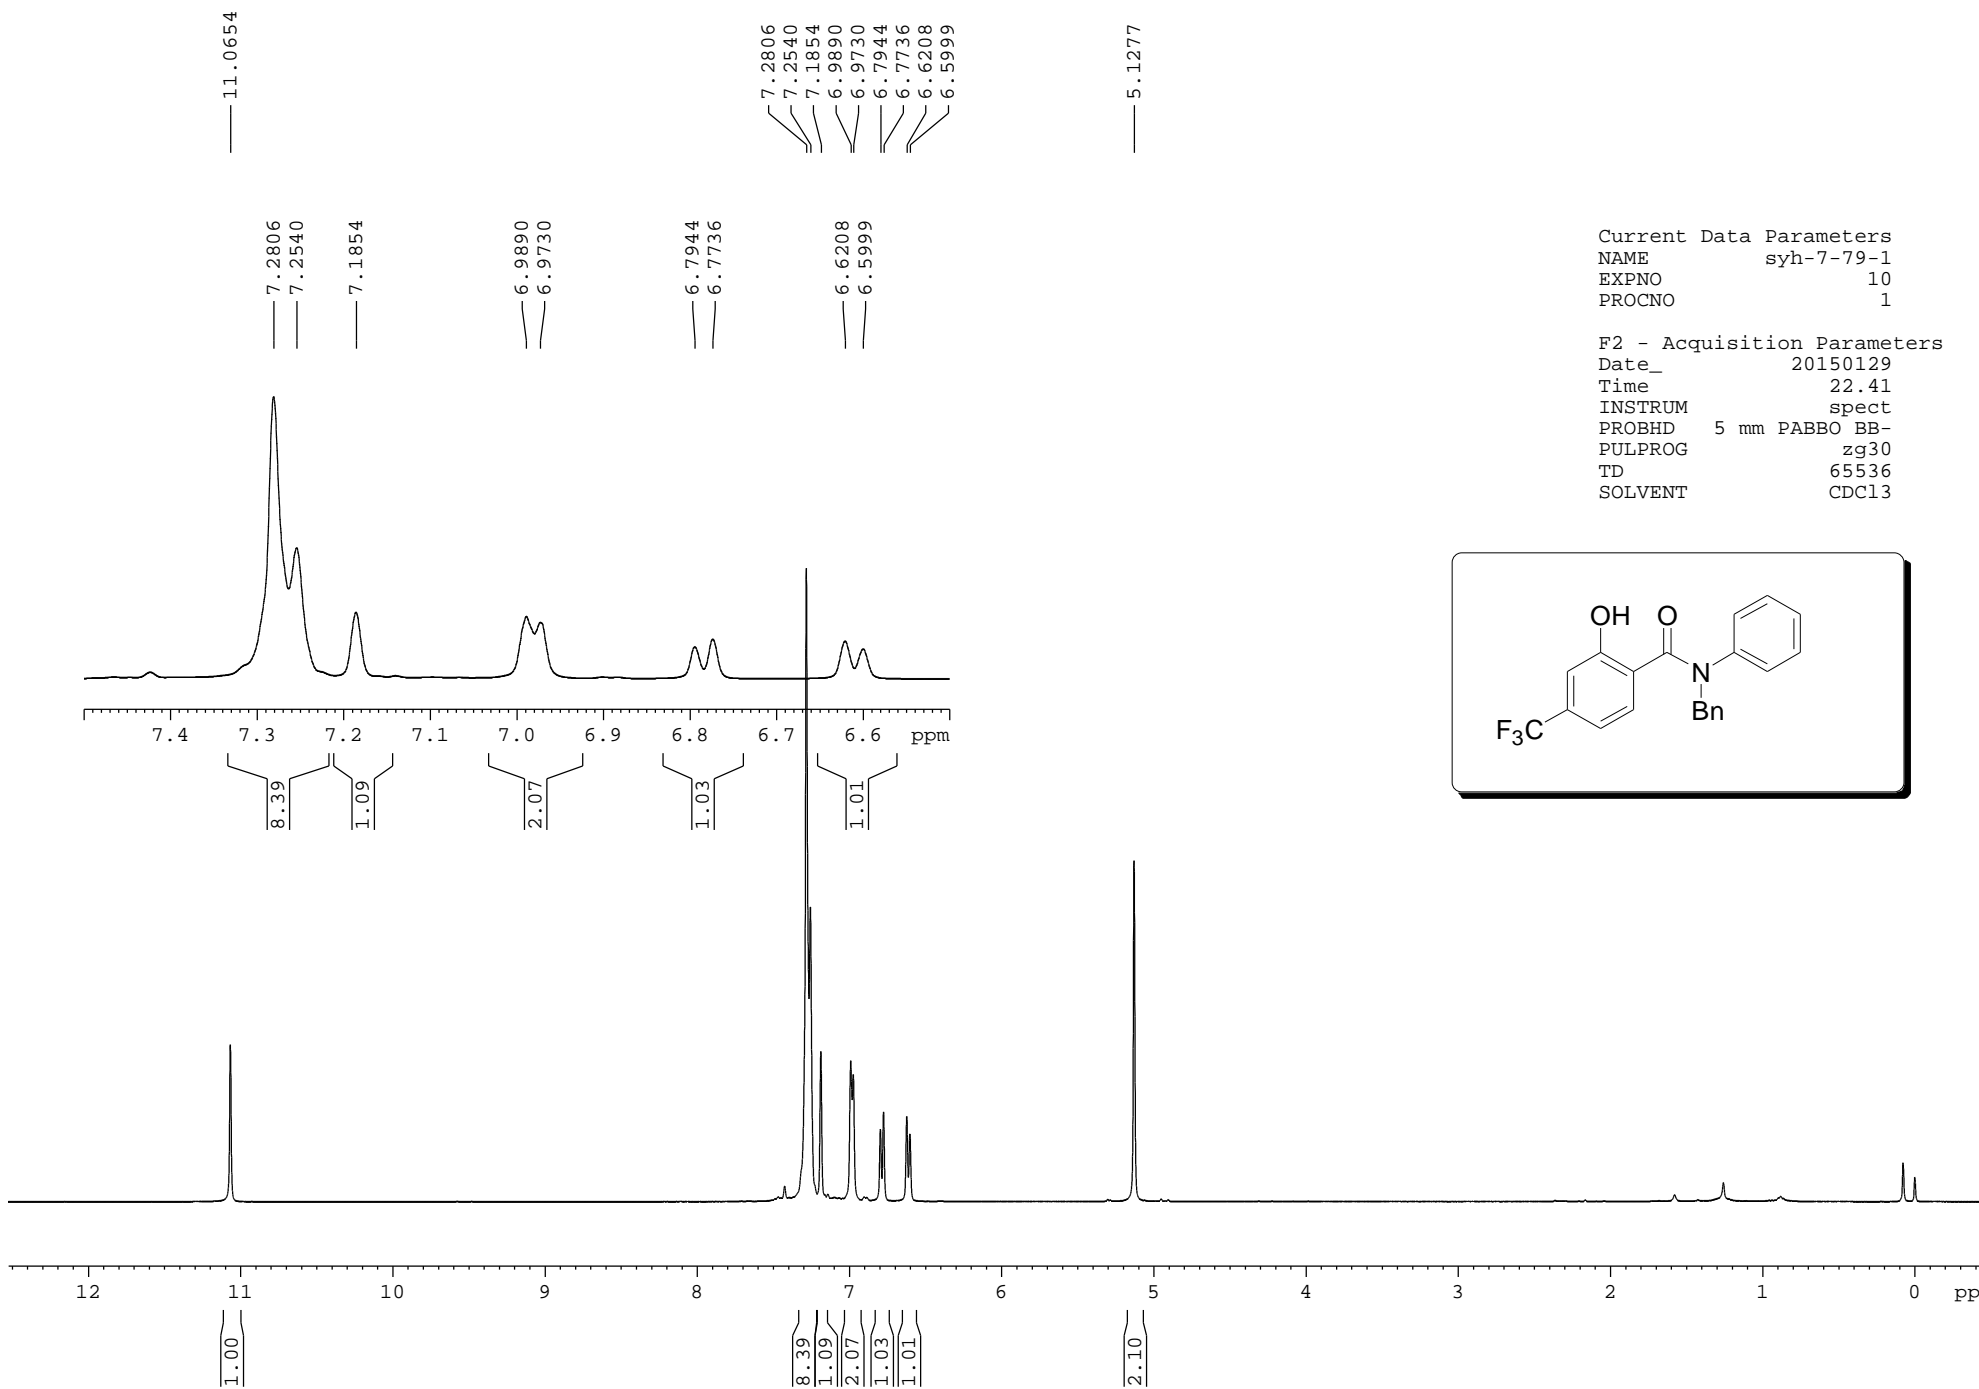

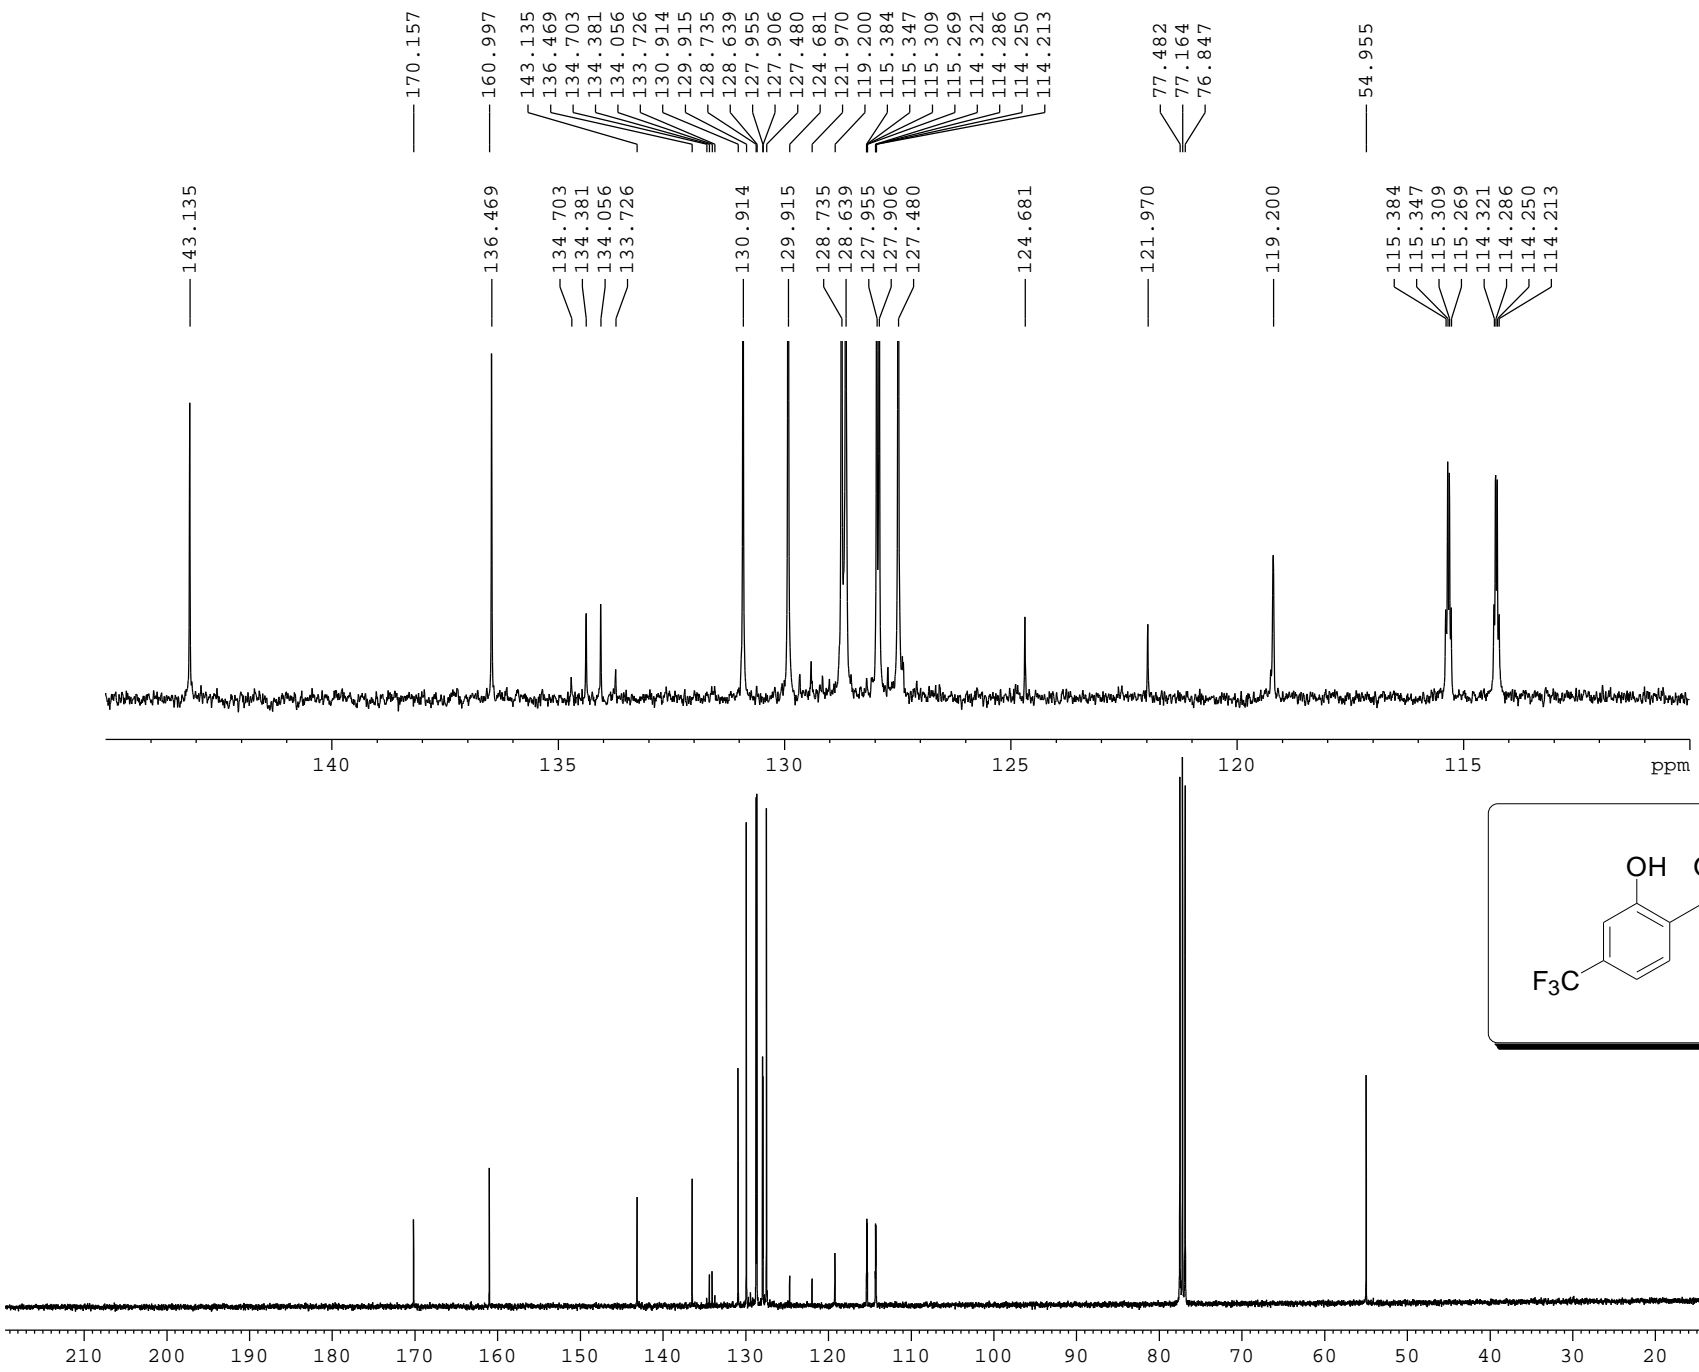

Current Data Parameters  
 NAME syh-7-79-1-c  
 EXPNO 20  
 PROCNO 1

F2 - Acquisition Parameters  
 Date\_ 20150129  
 Time 23.48  
 INSTRUM spect  
 PROBHD 5 mm PABBO BB-  
 PULPROG zgpg30  
 TD 65536  
 SOLVENT CDCl3  
 NS 600  
 DS 4  
 SWH 24038.461 Hz  
 FIDRES 0.366798 Hz  
 AQ 1.3631988 se  
 RG 209.25  
 DW 20.829 us  
 DE 6.50 us  
 TE 295.6 K  
 D1 2.00000000 se  
 D11 0.03000000 se  
 TD0 1

==== CHANNEL f1 =====  
 NUC1 13C  
 P1 10.59 us  
 PLW1 50.00299835 W  
 SFO1 100.6228293 MH

==== CHANNEL f2 =====  
 CPDPRG2 waltz16  
 NUC2 1H  
 PCPD2 90.00 us  
 PLW2 13.00199986 W  
 PLW12 0.35303000 W  
 PLW13 0.28595001 W  
 SFO2 400.1316005 MH

F2 - Processing parameters  
 SI 32768  
 SF 100.6127568 MH  
 WDW EM  
 SSB 0  
 LB 1.00 Hz  
 GB 0  
 PC 1.40

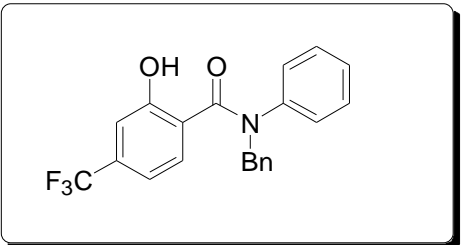

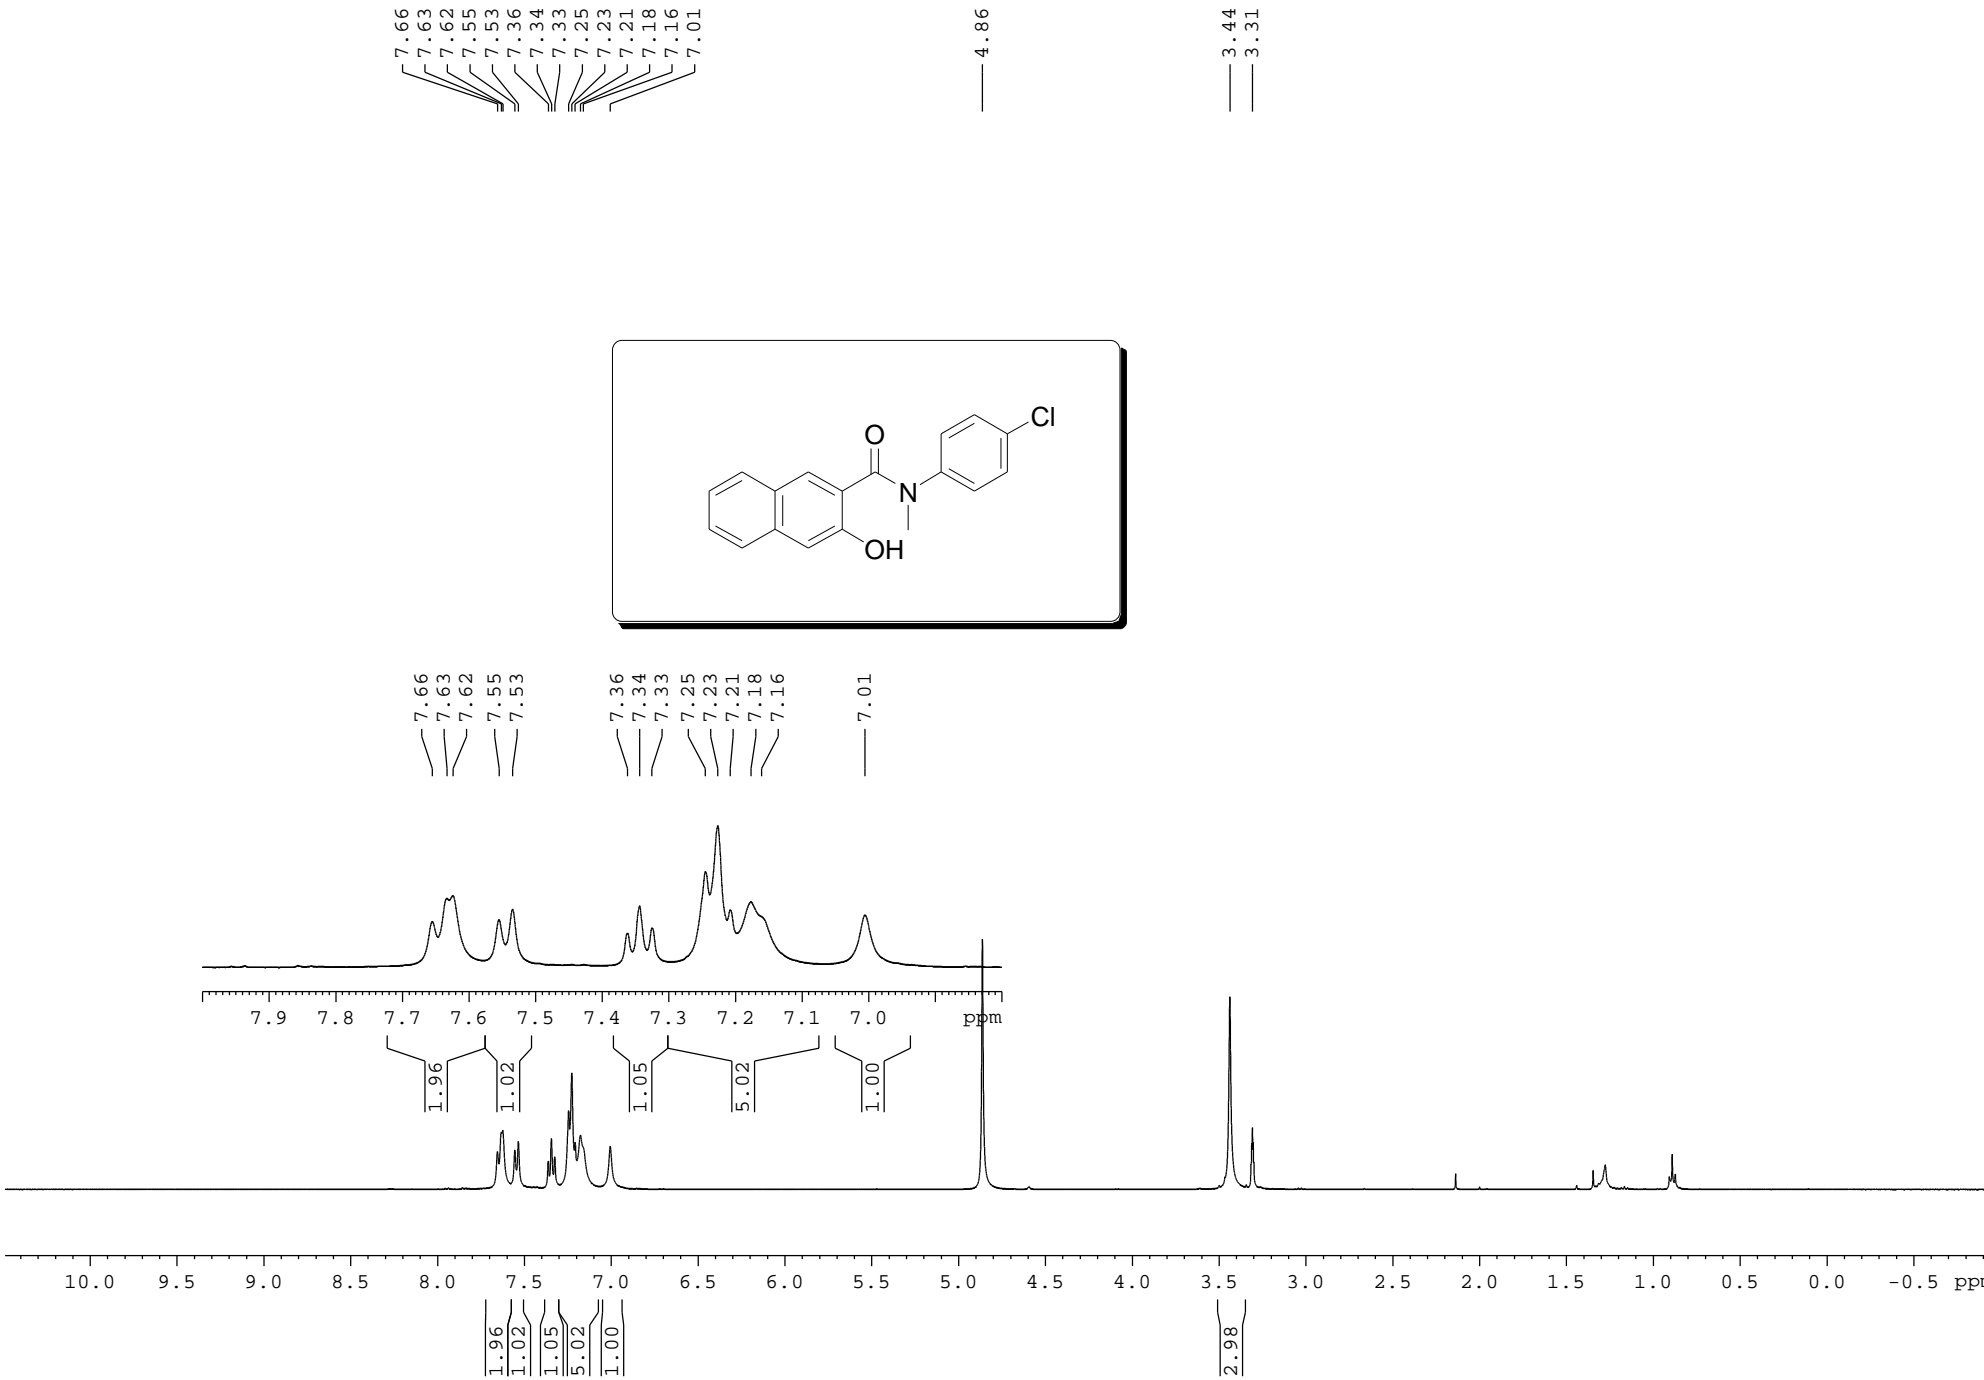

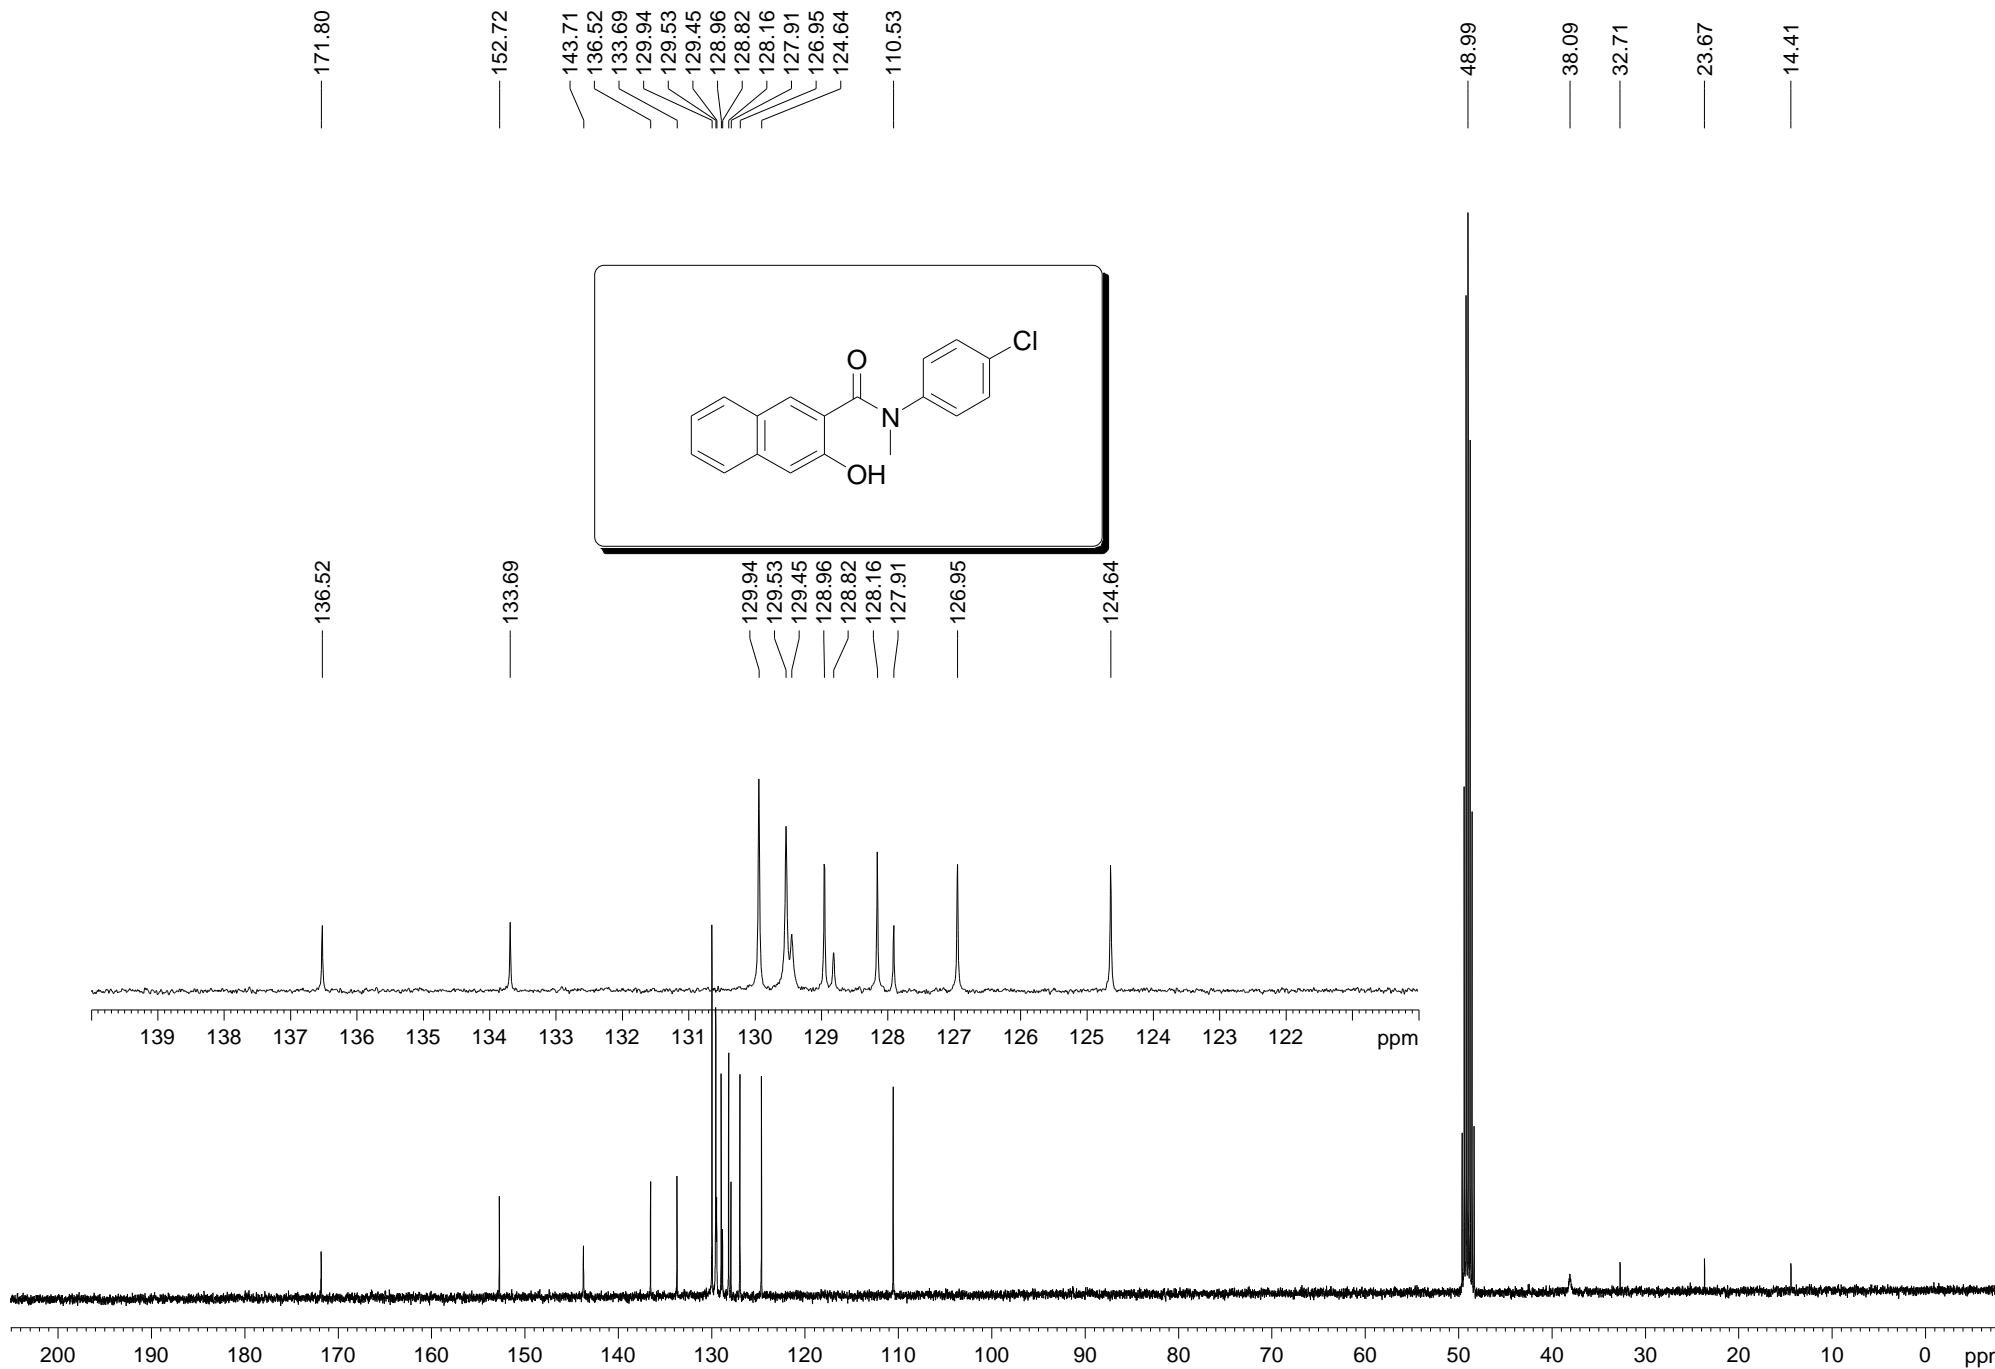

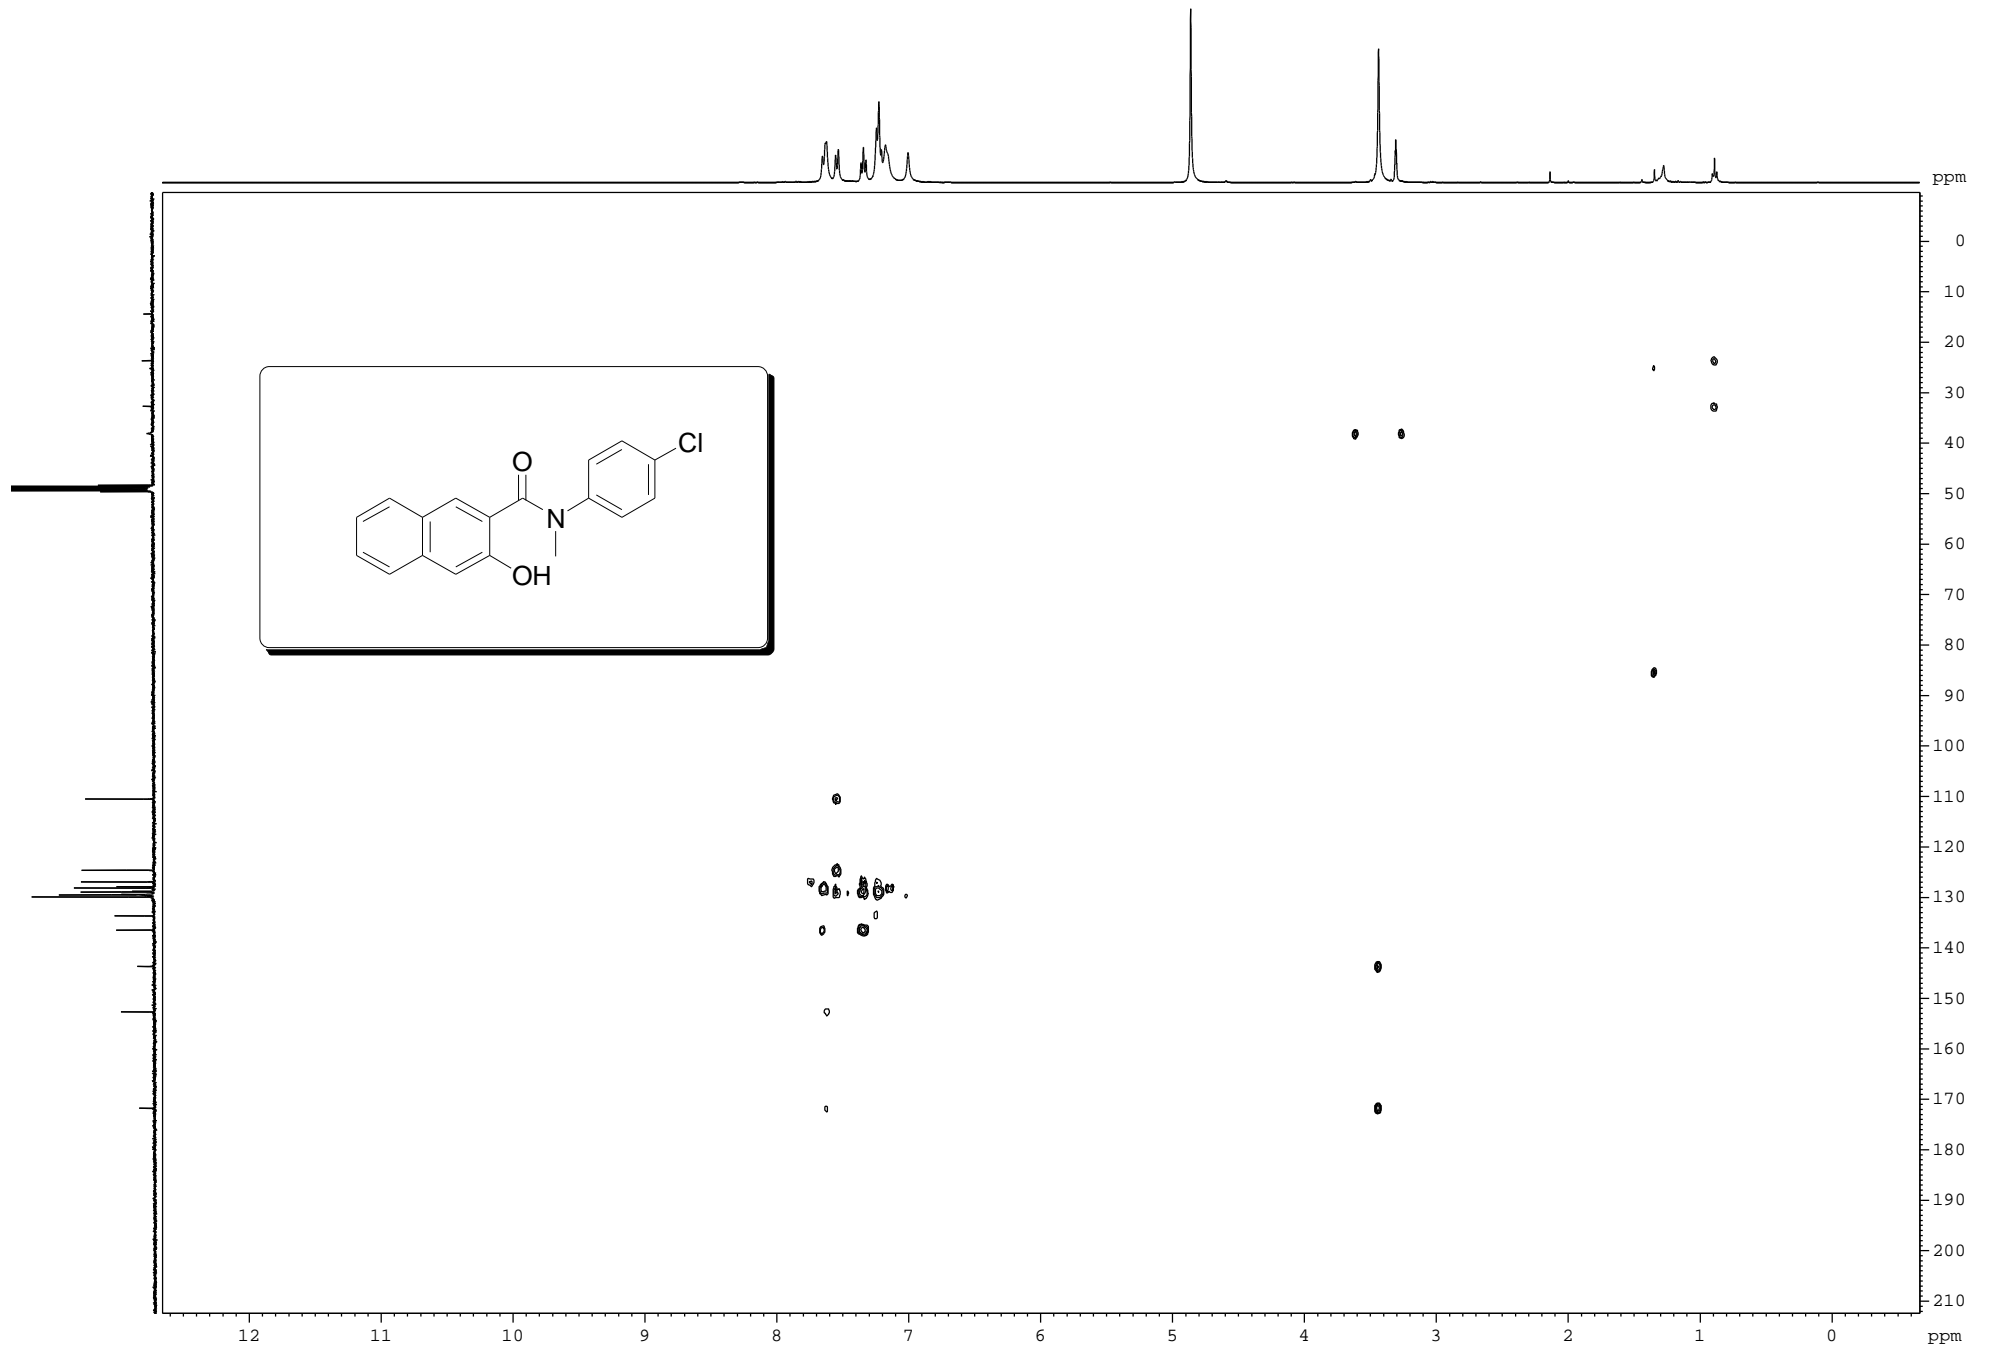

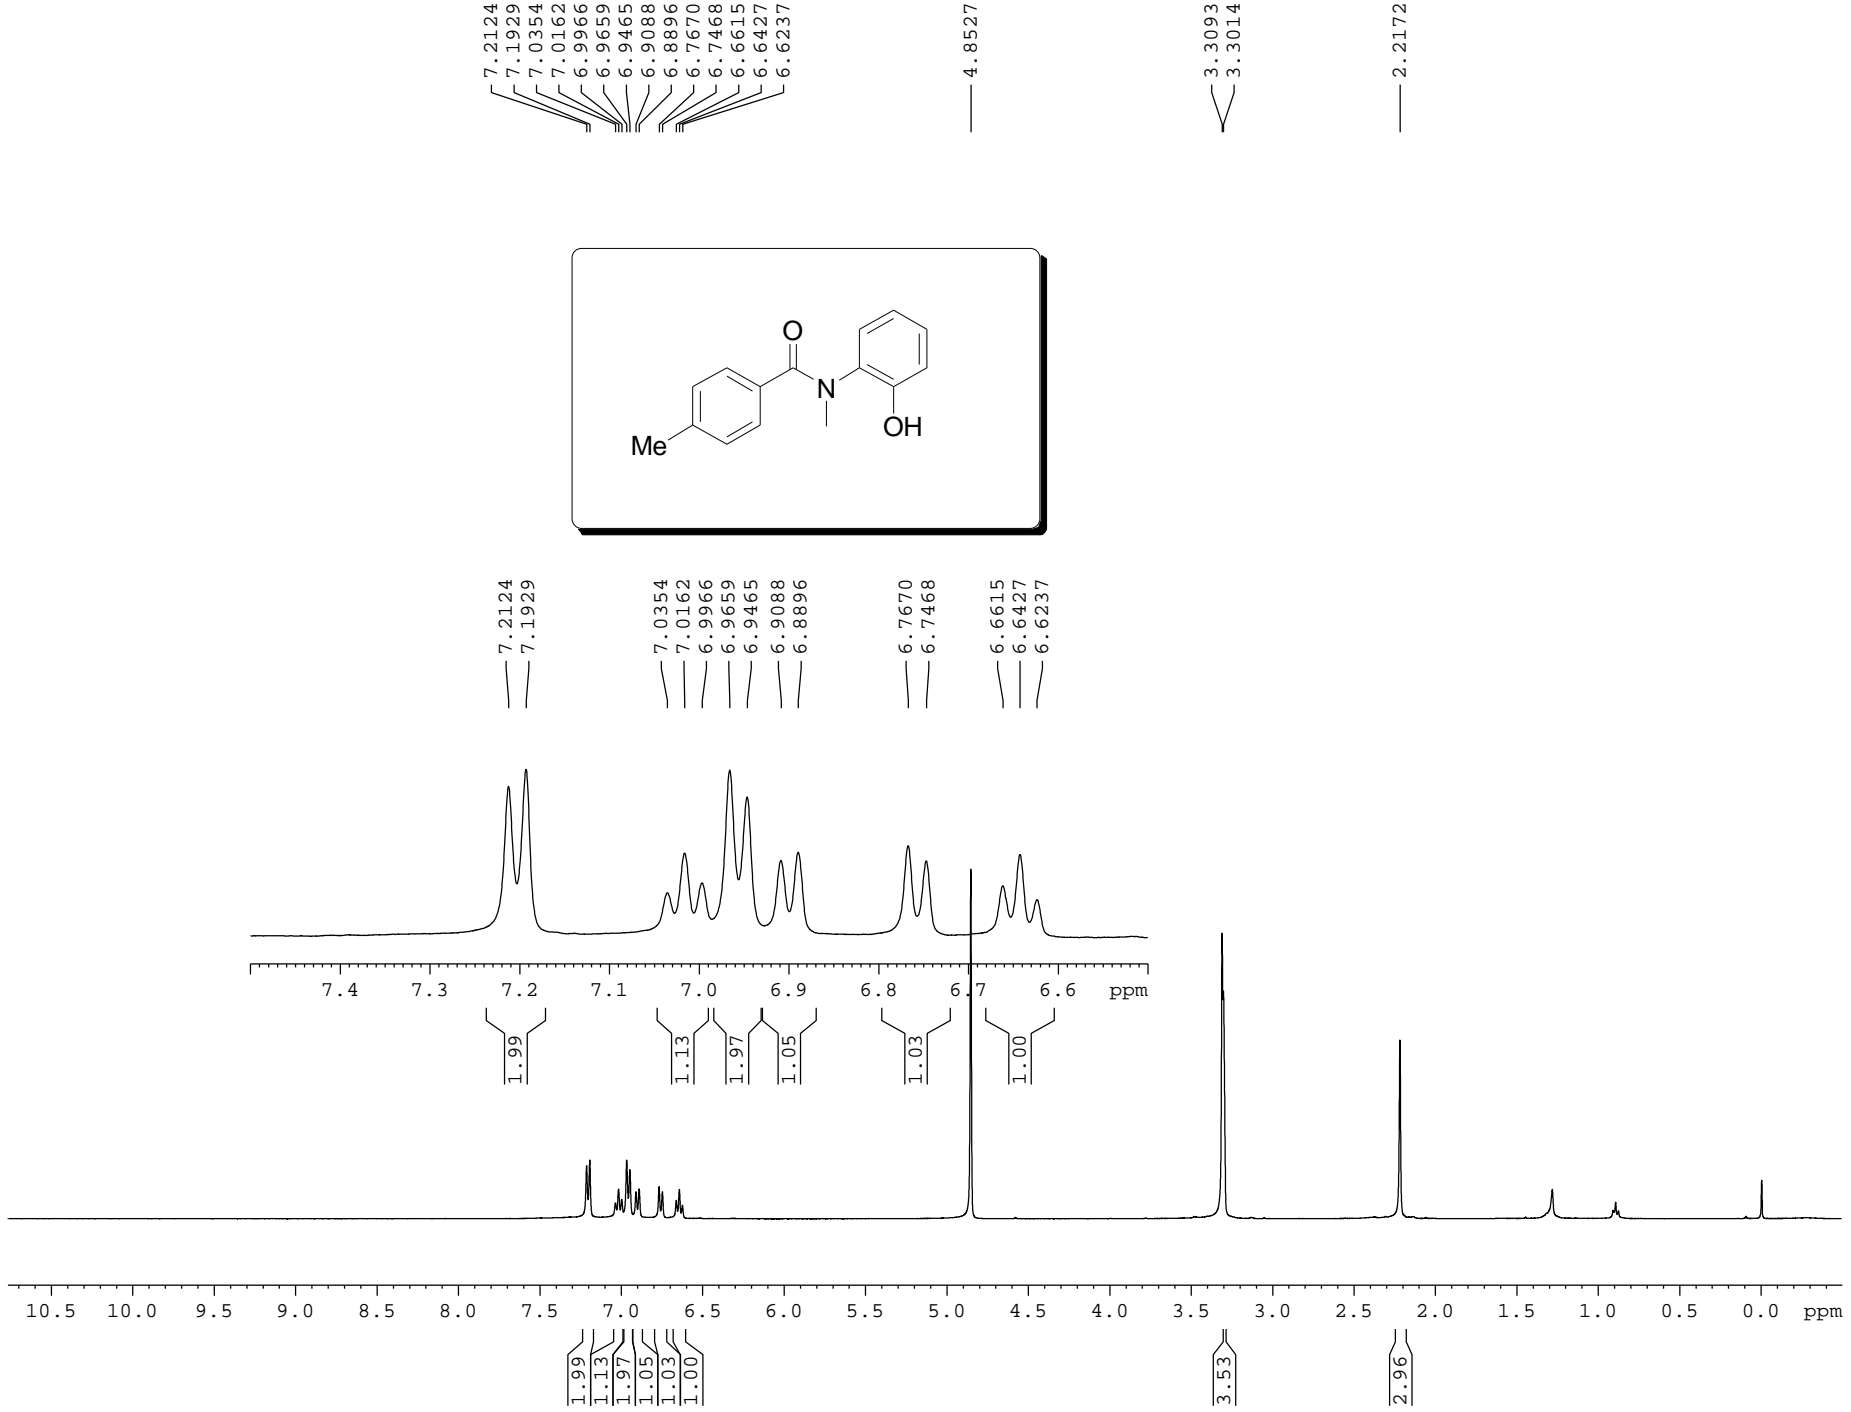

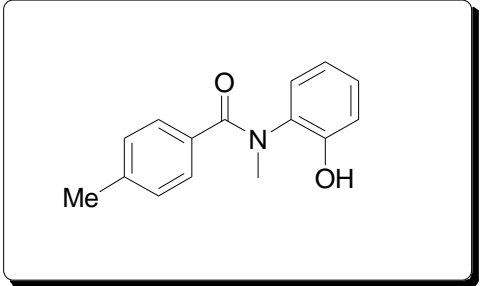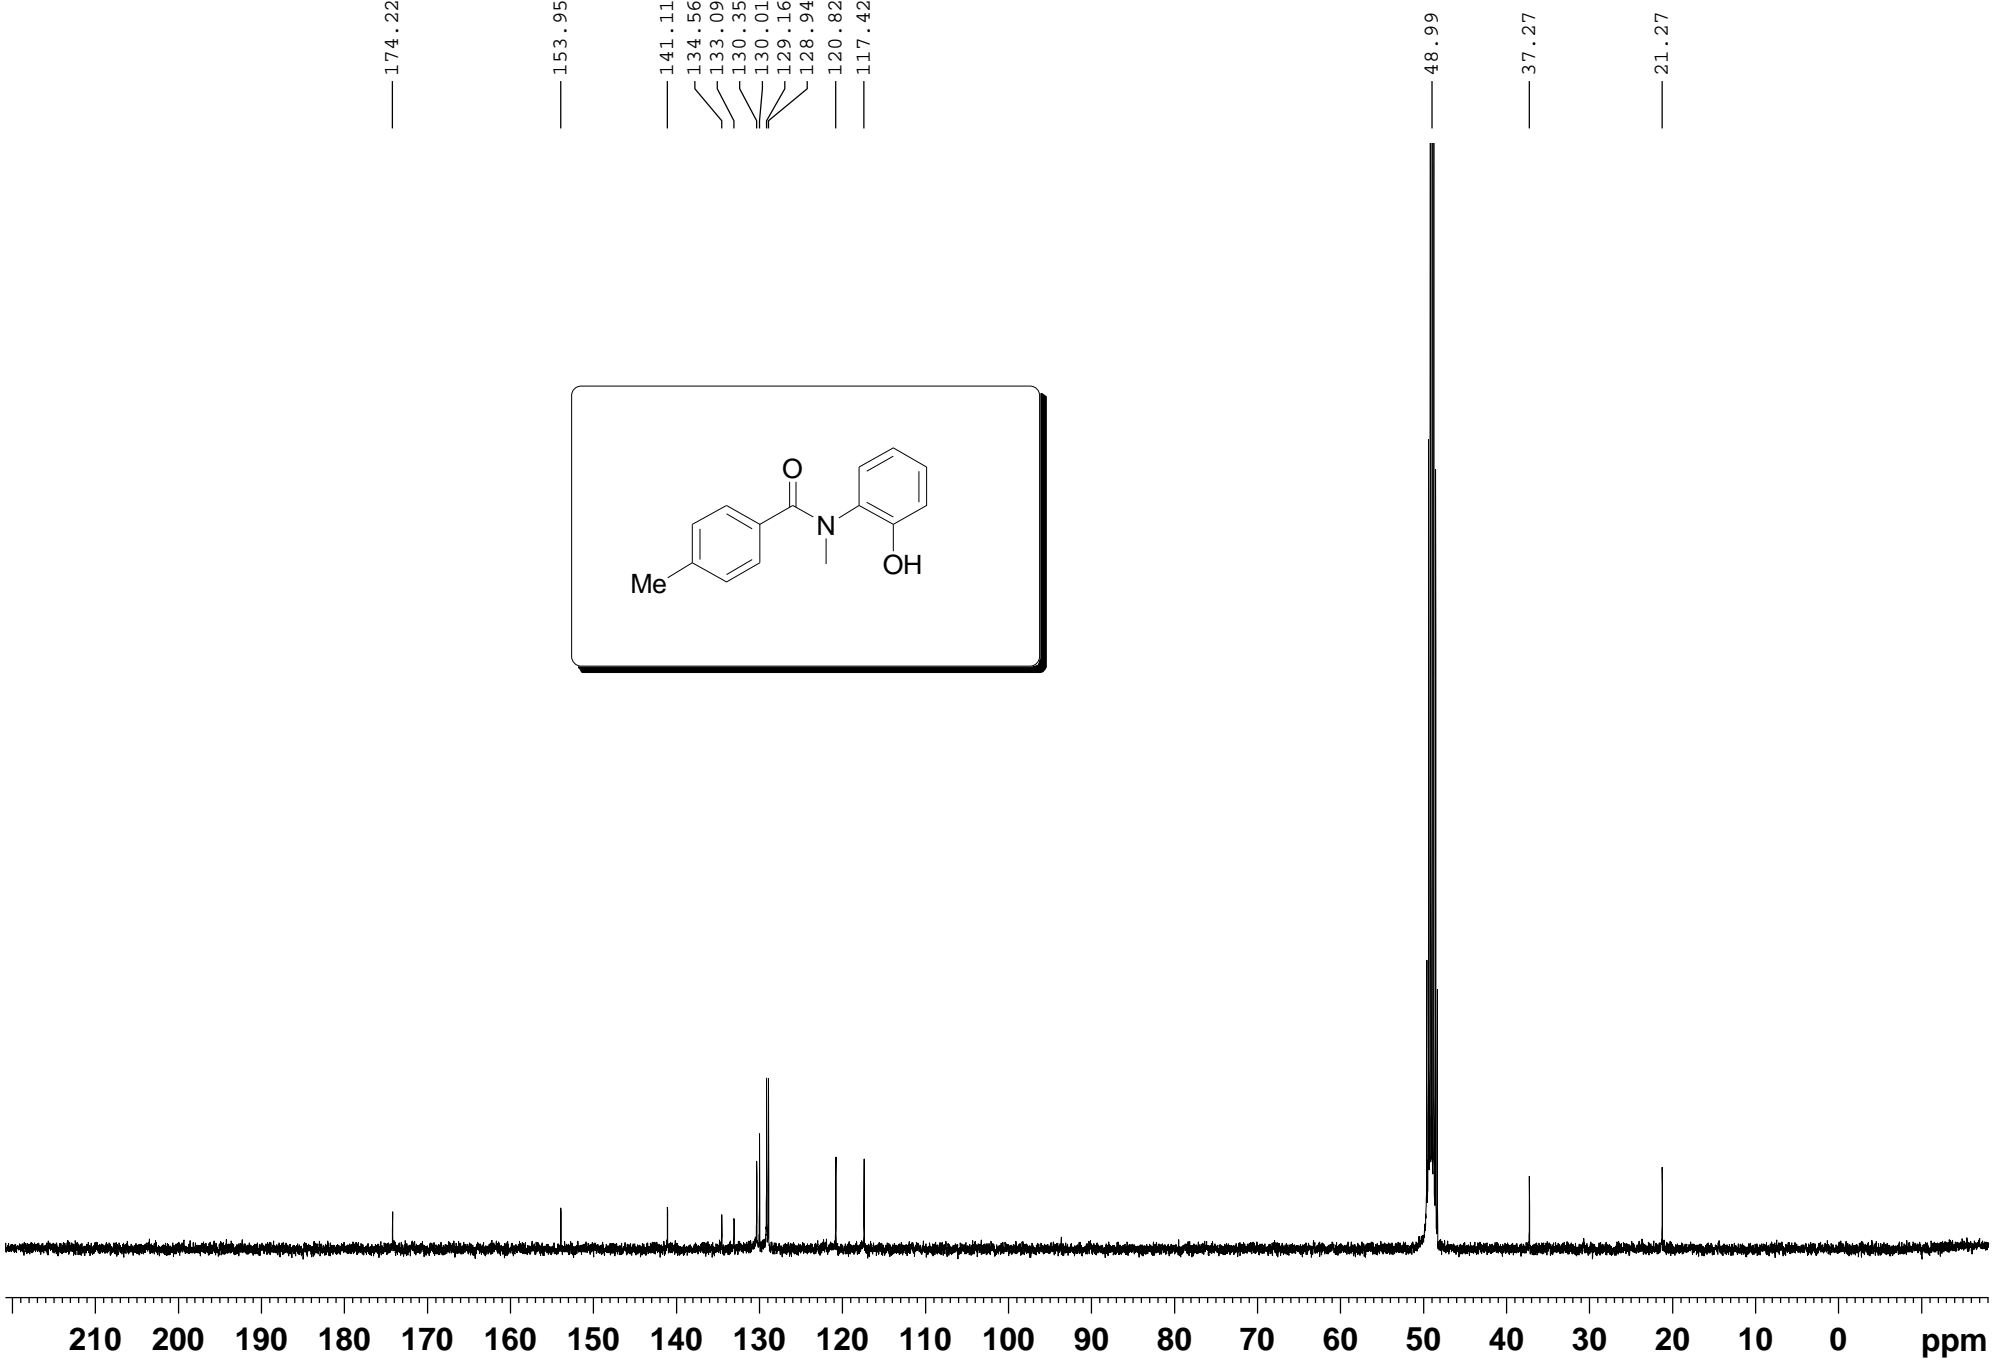



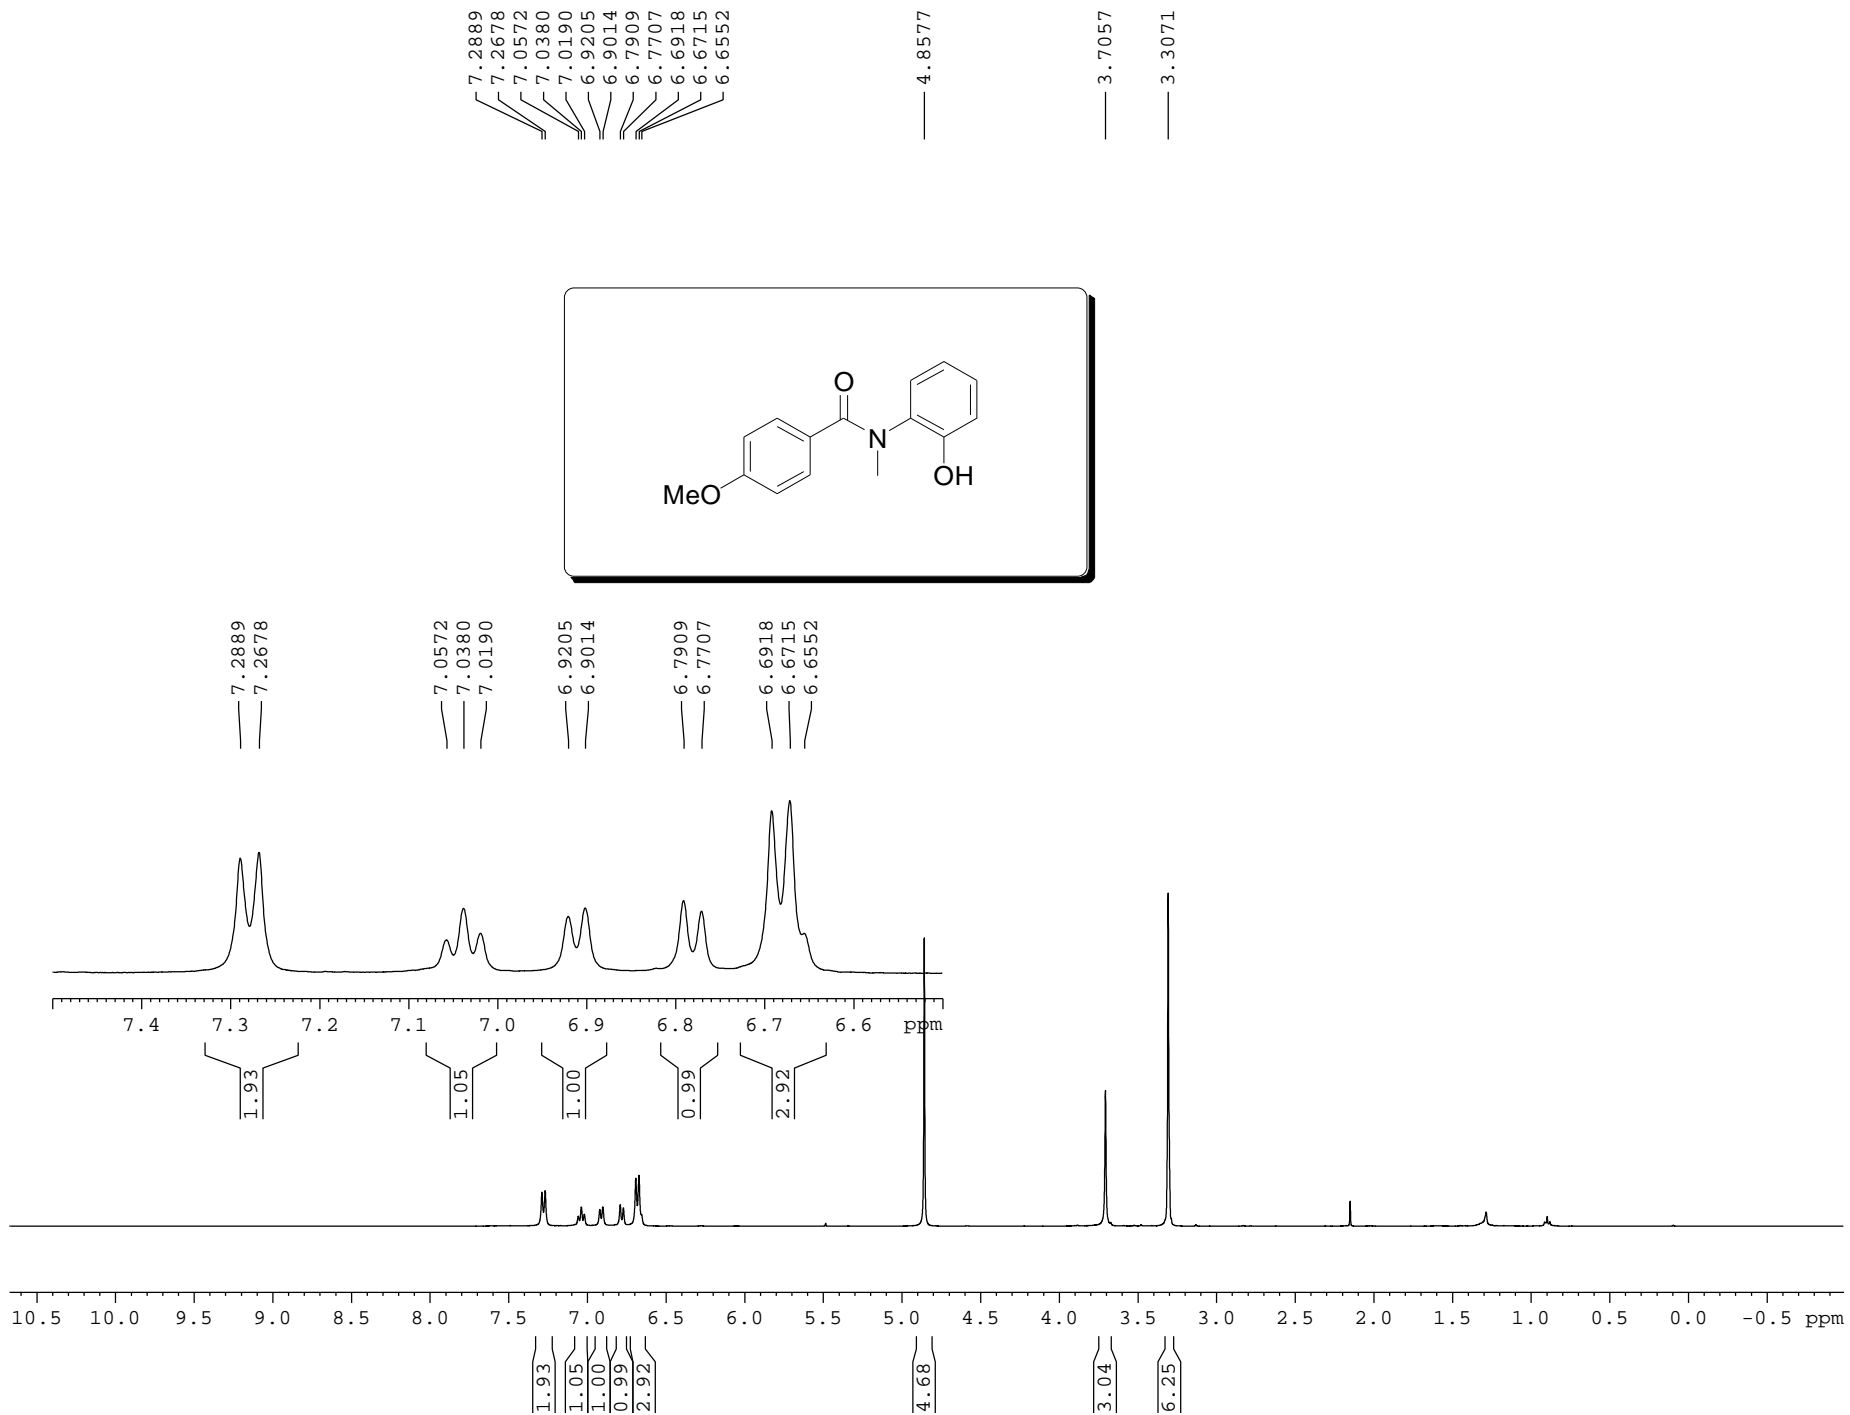

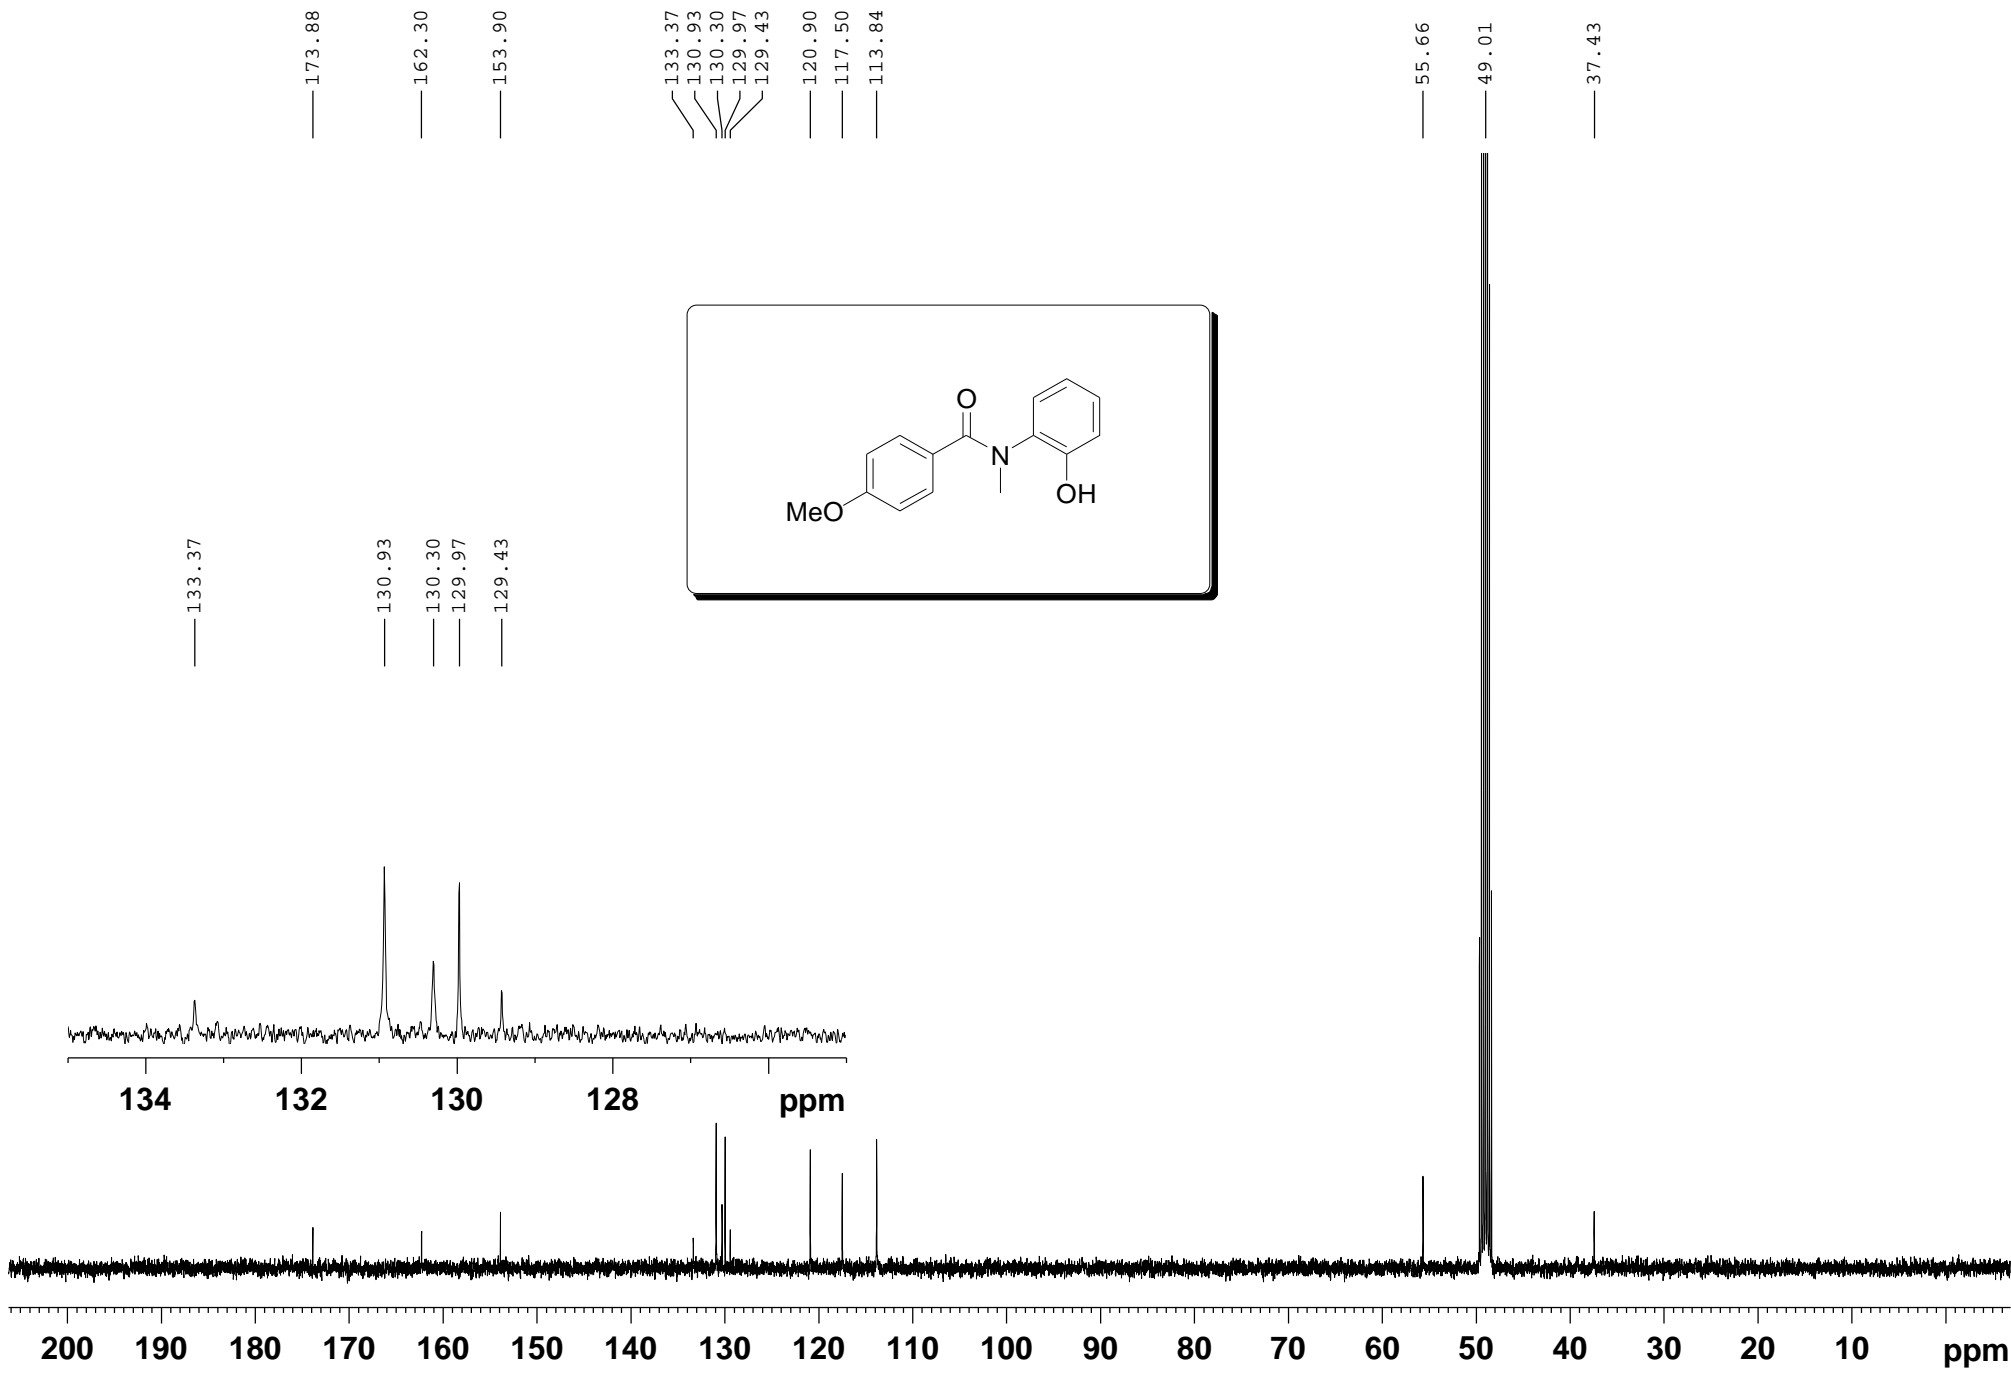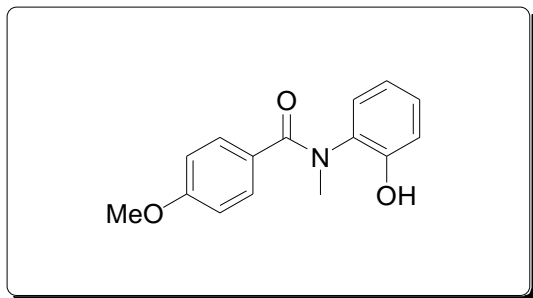

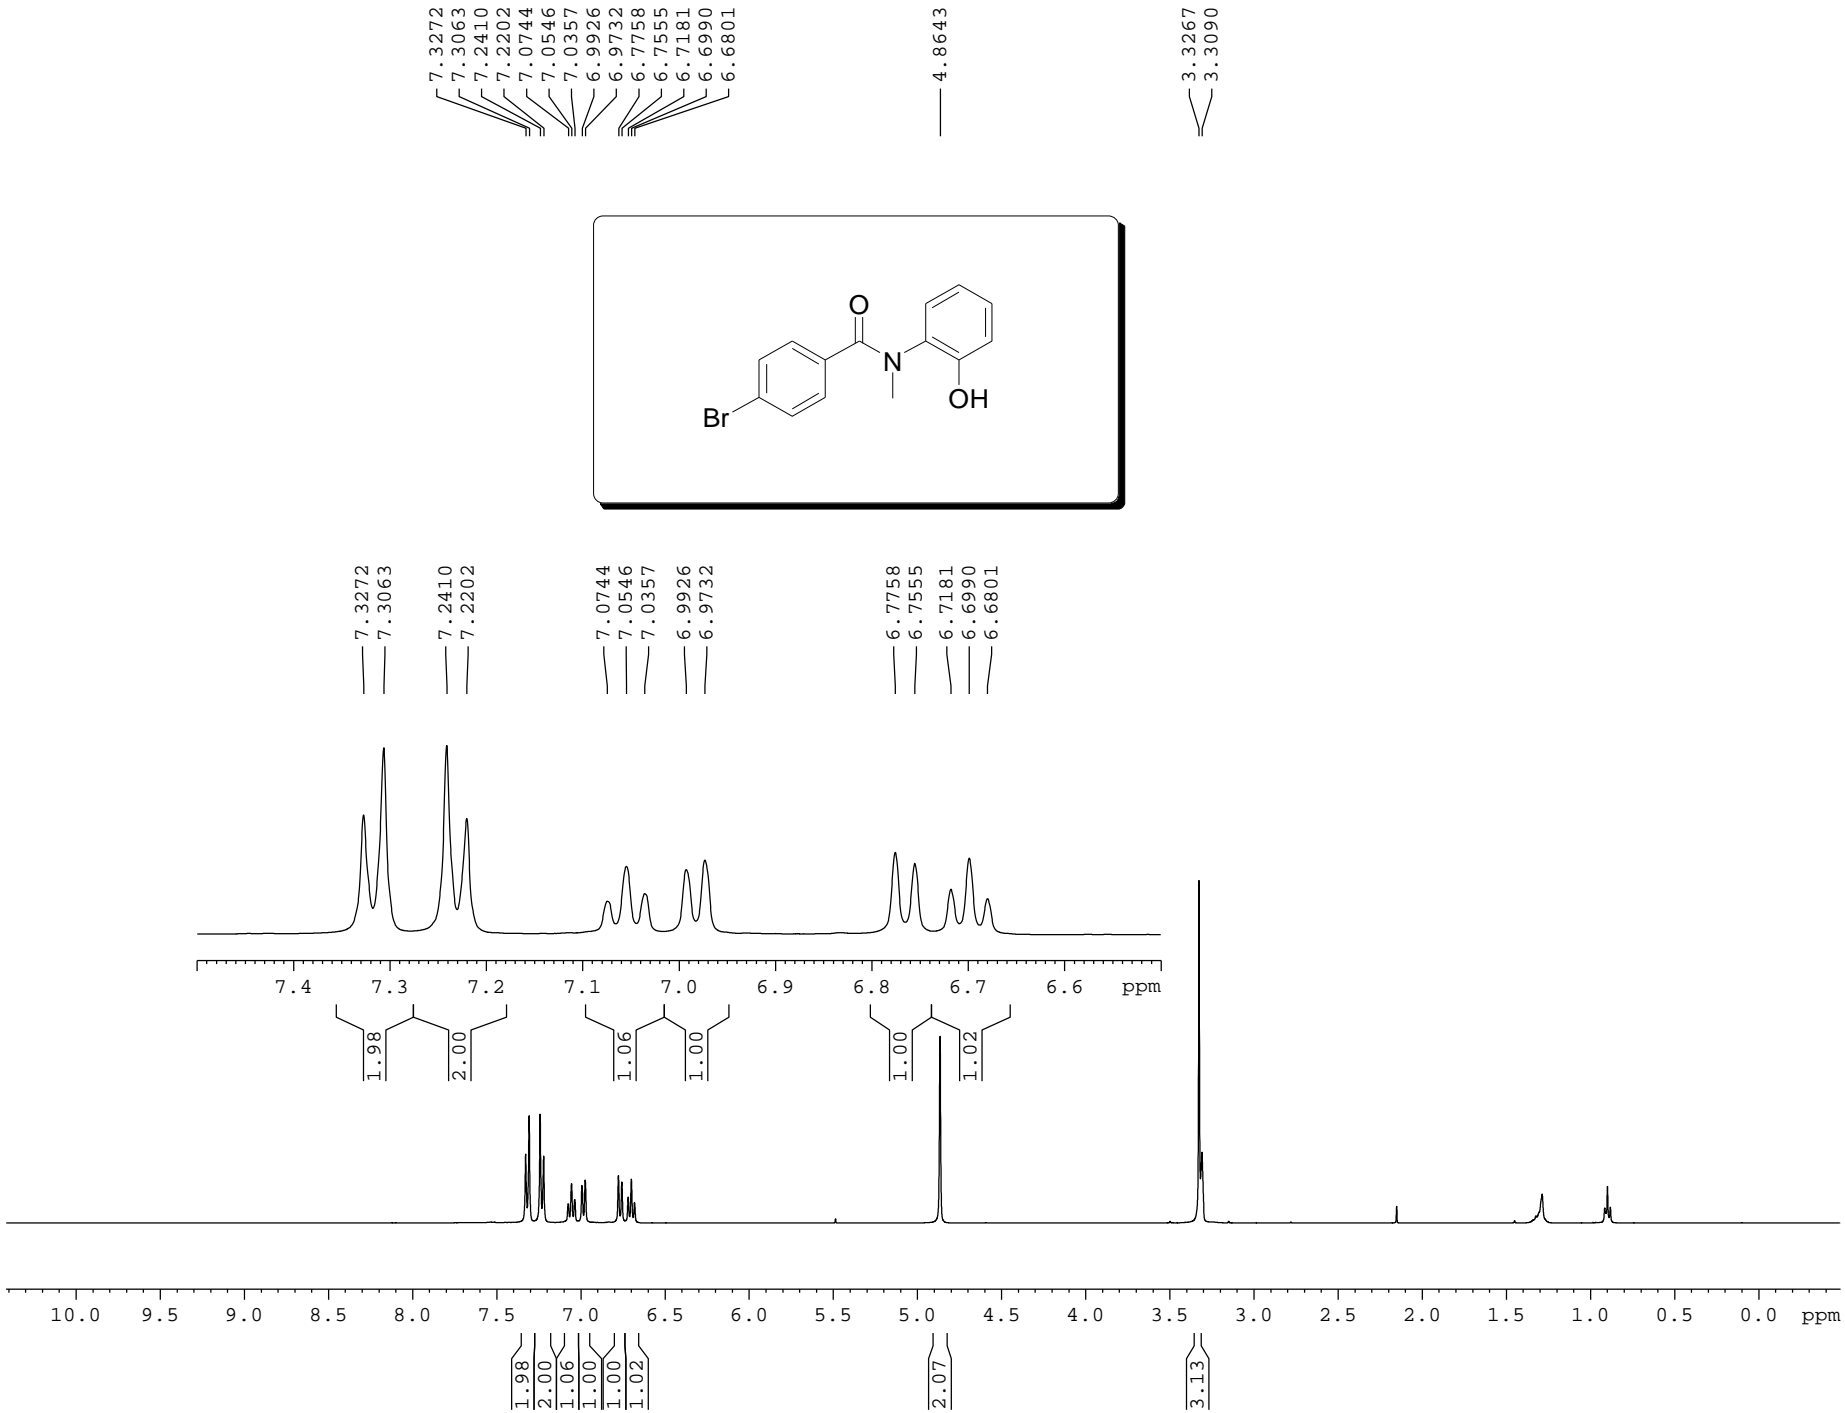

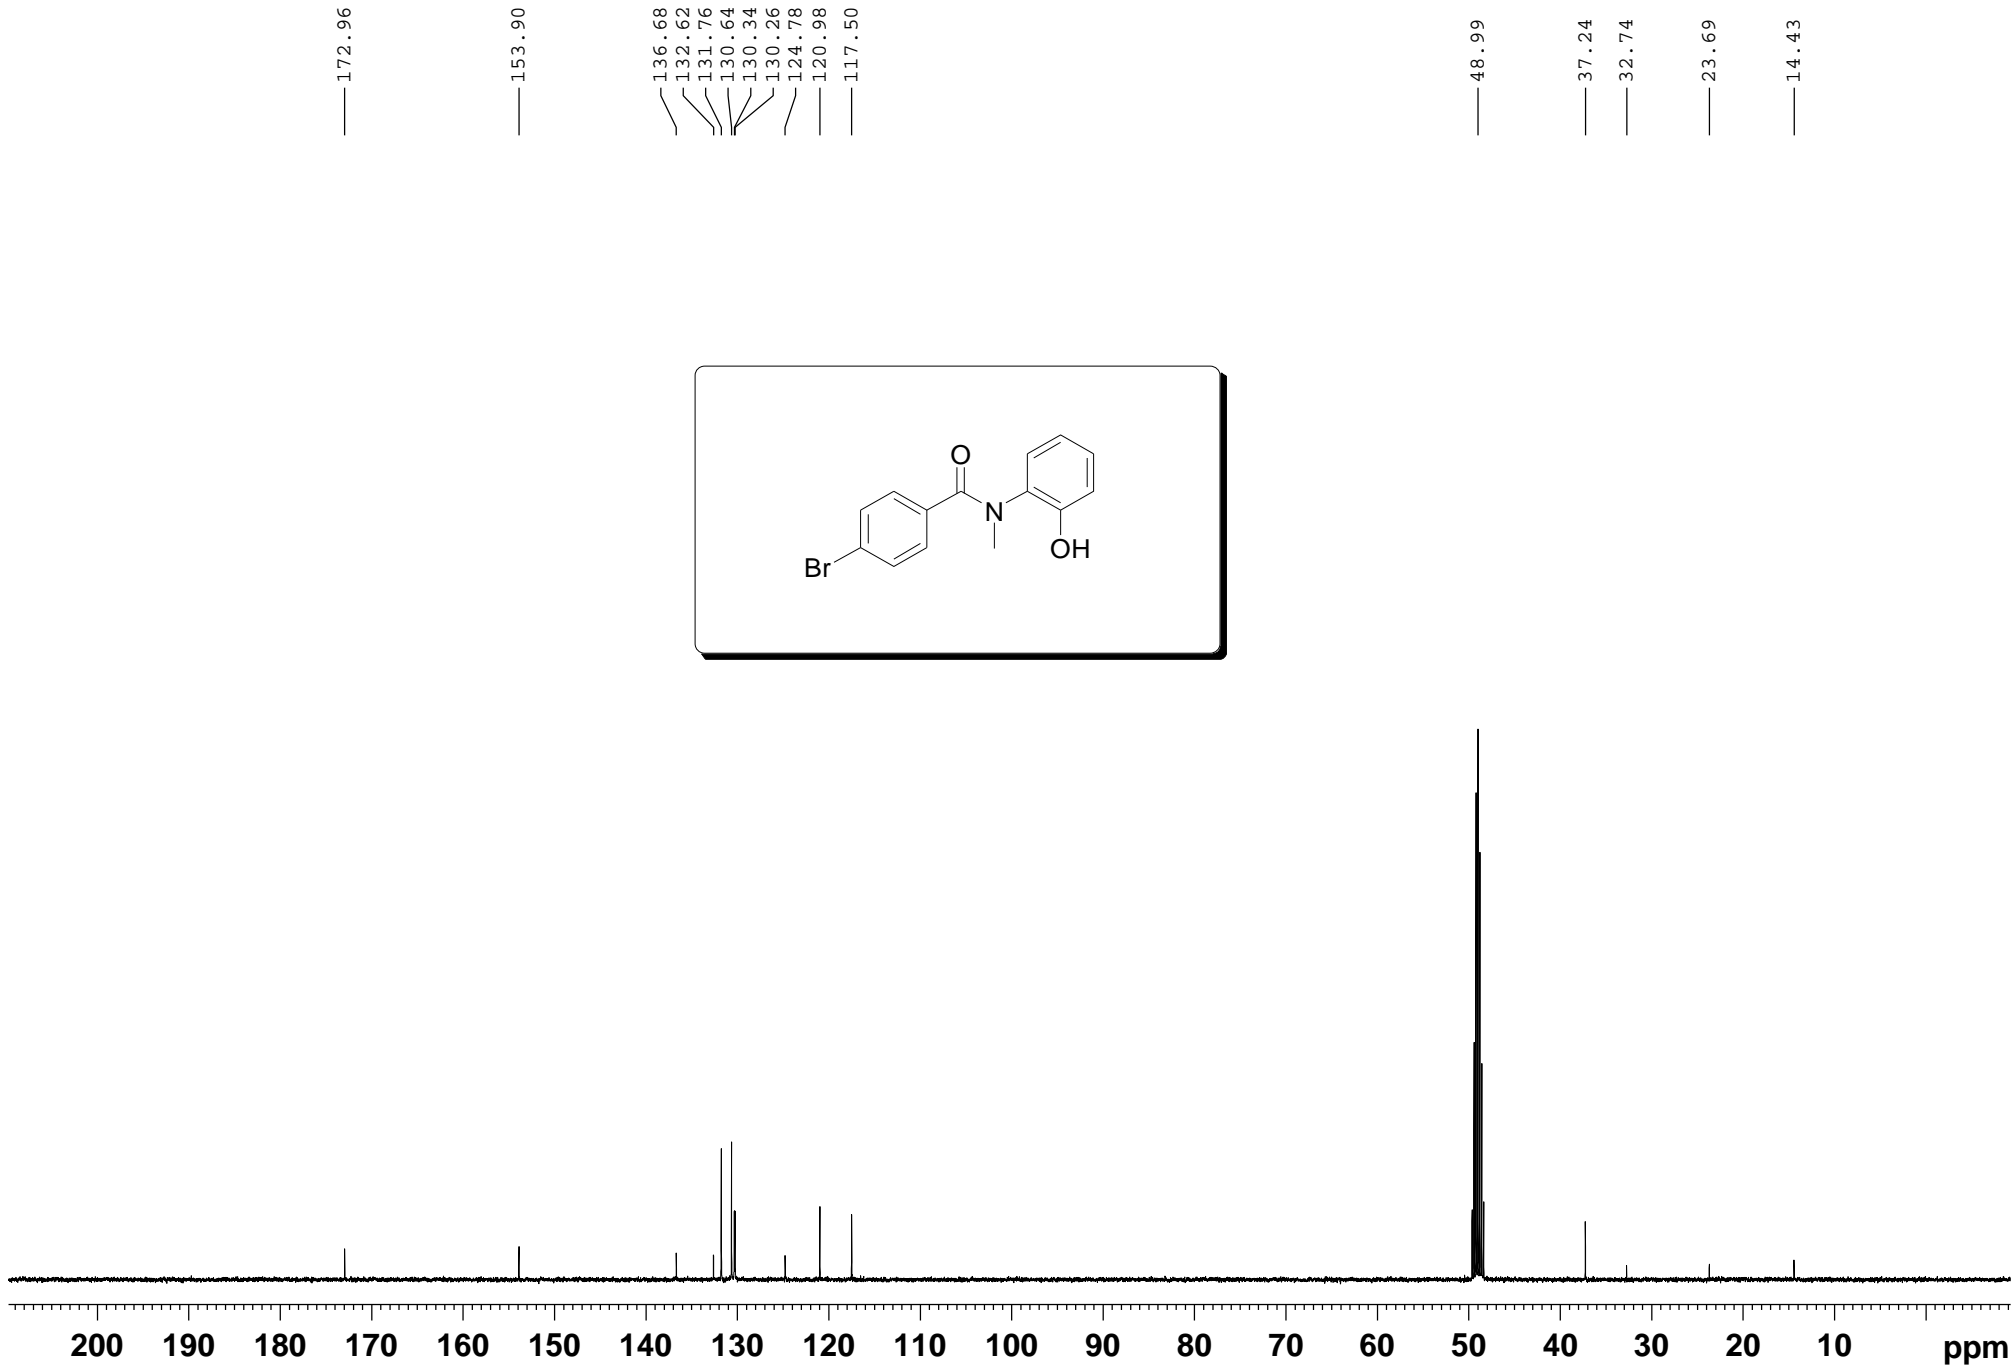

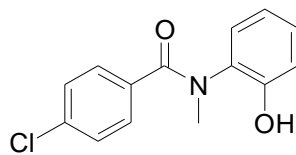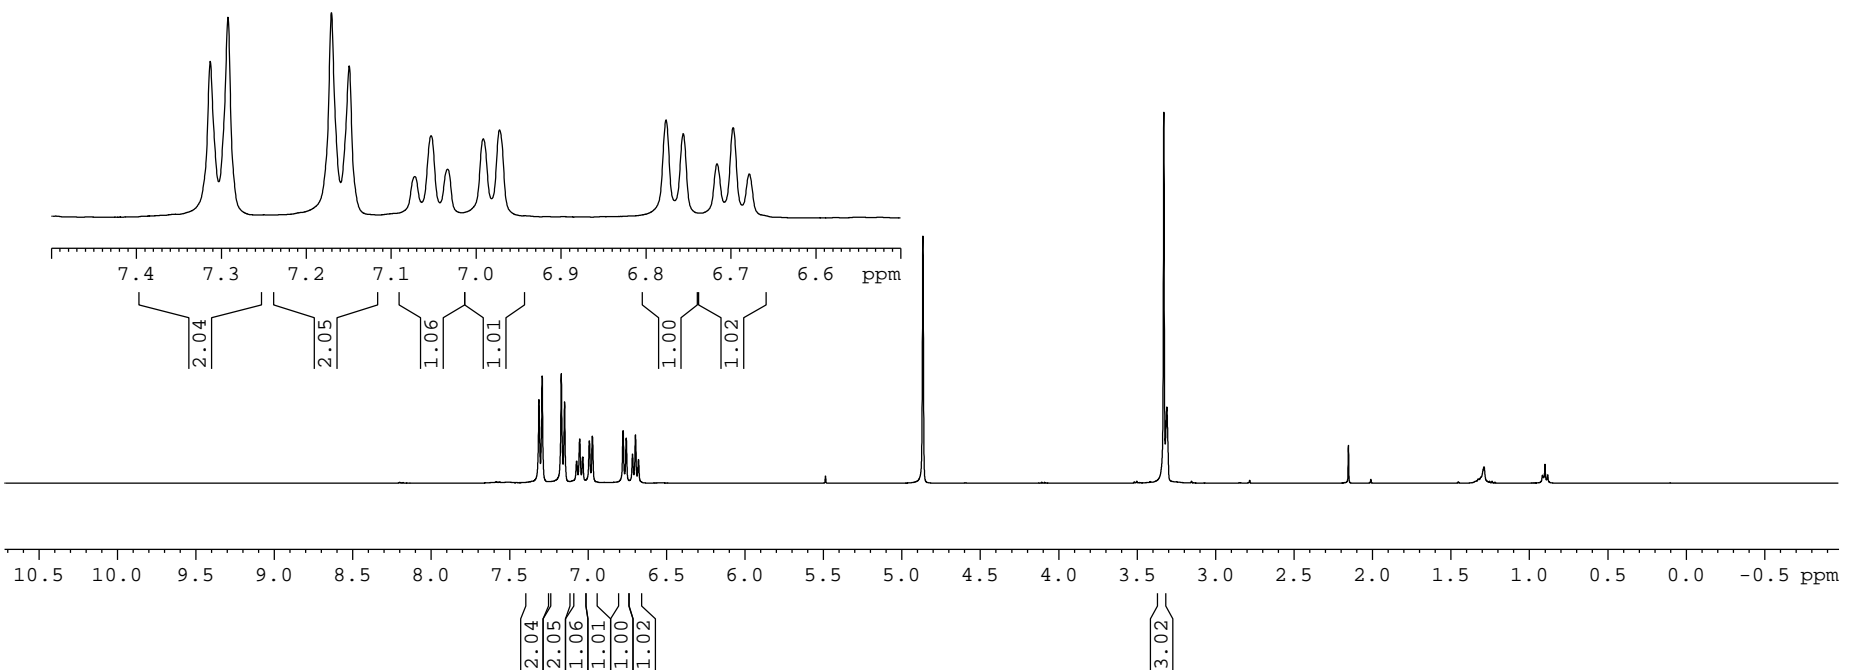

7.3127  
7.2918

7.1700  
7.1491

7.0719  
7.0526  
7.0332  
6.9913  
6.9721

6.7761  
6.7559  
6.7161  
6.6971  
6.6782

7.3127  
7.2918  
7.1700  
7.1491  
7.0719  
7.0526  
7.0332  
6.9913  
6.9721  
6.7761  
6.7559  
6.7161  
6.6971  
6.6782

4.8650

3.3296  
3.3101

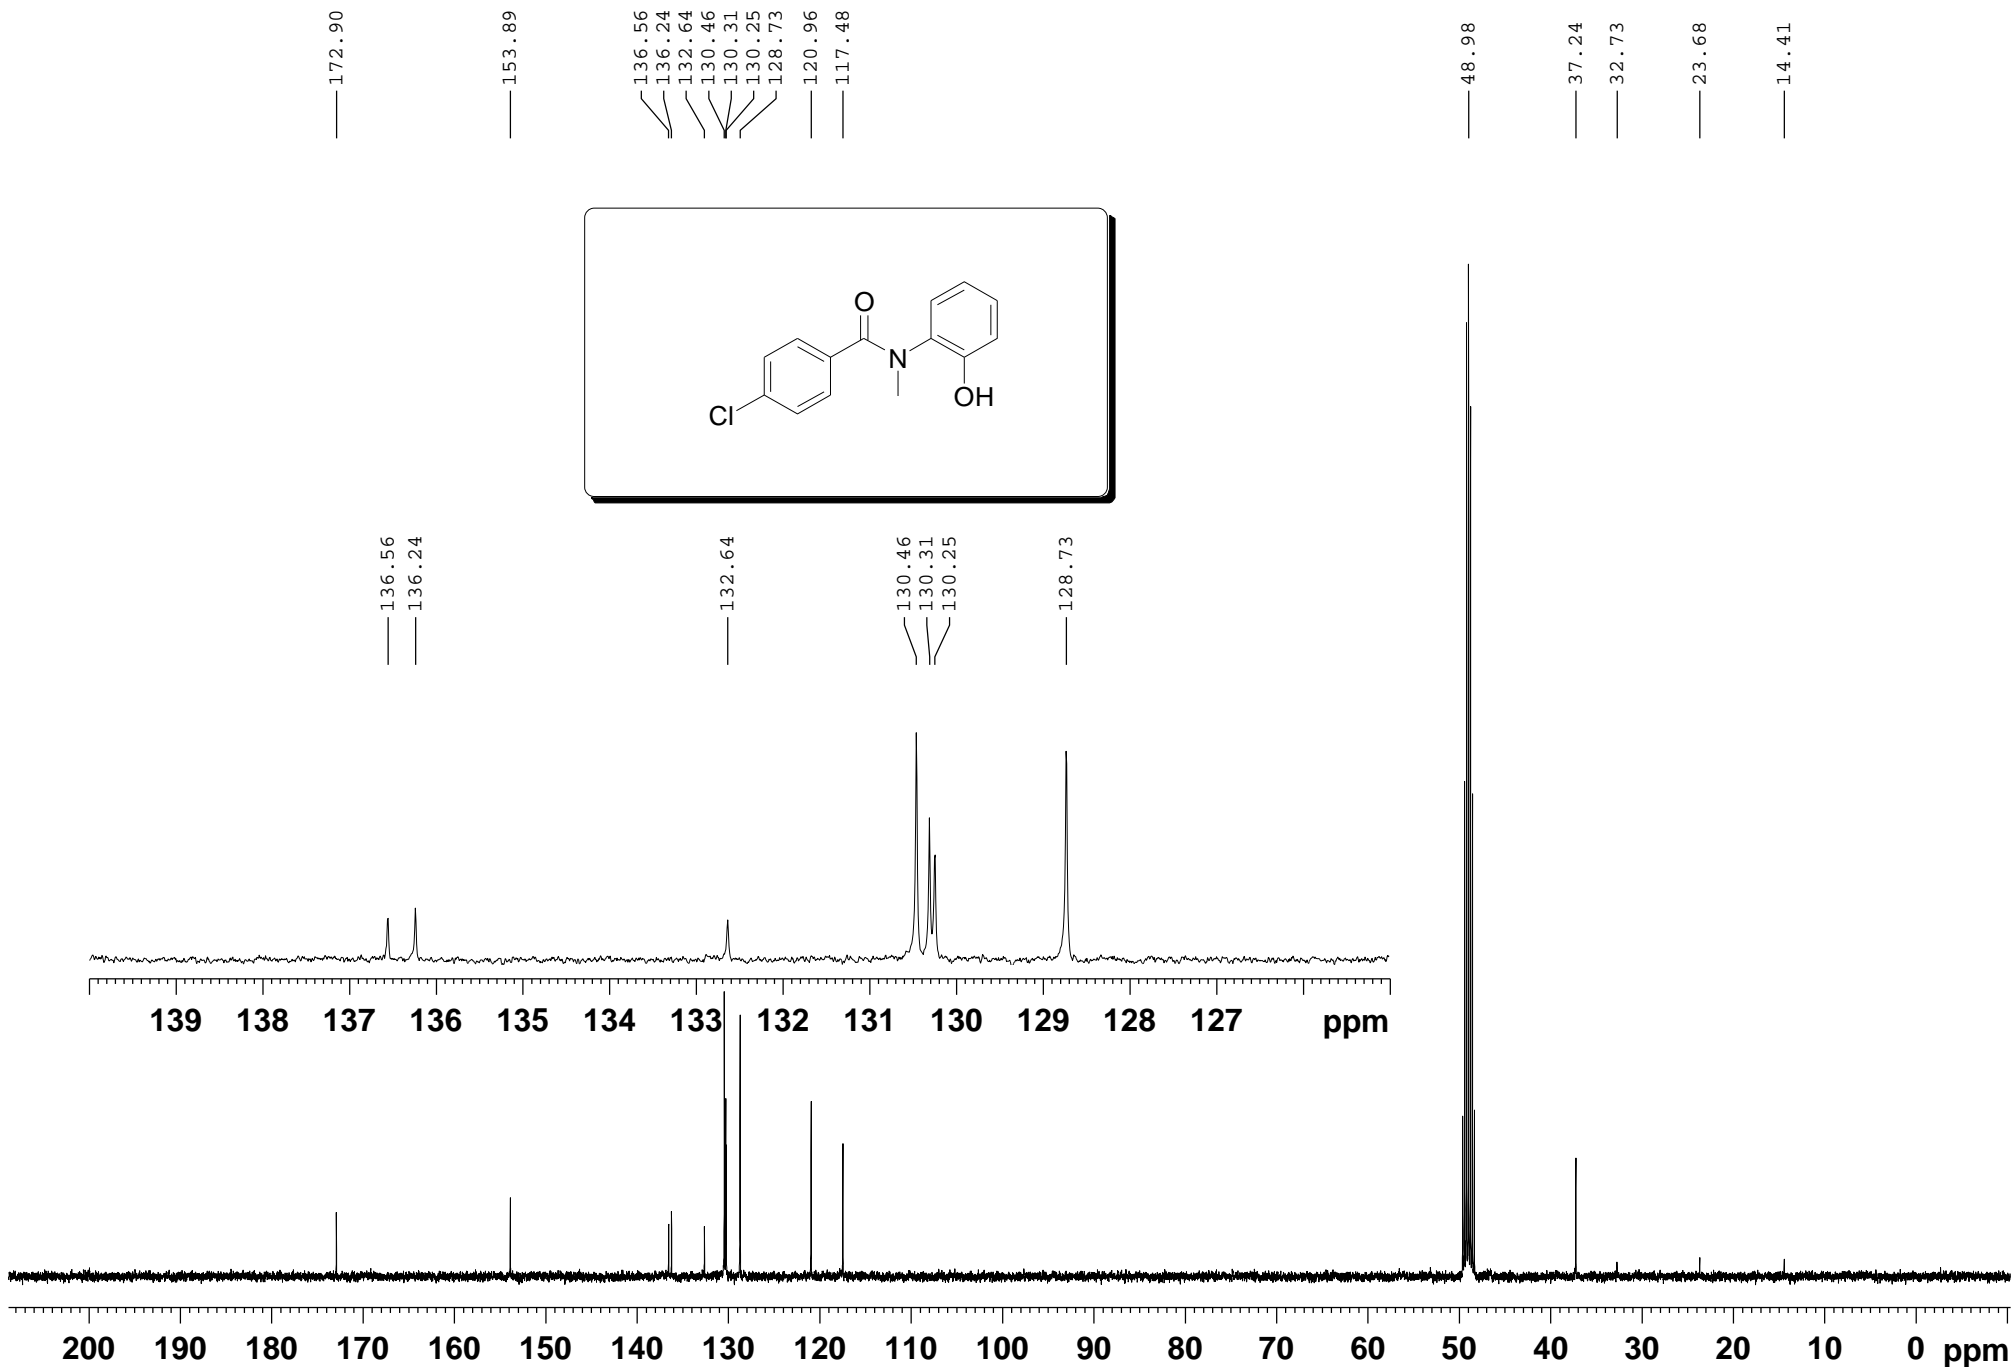

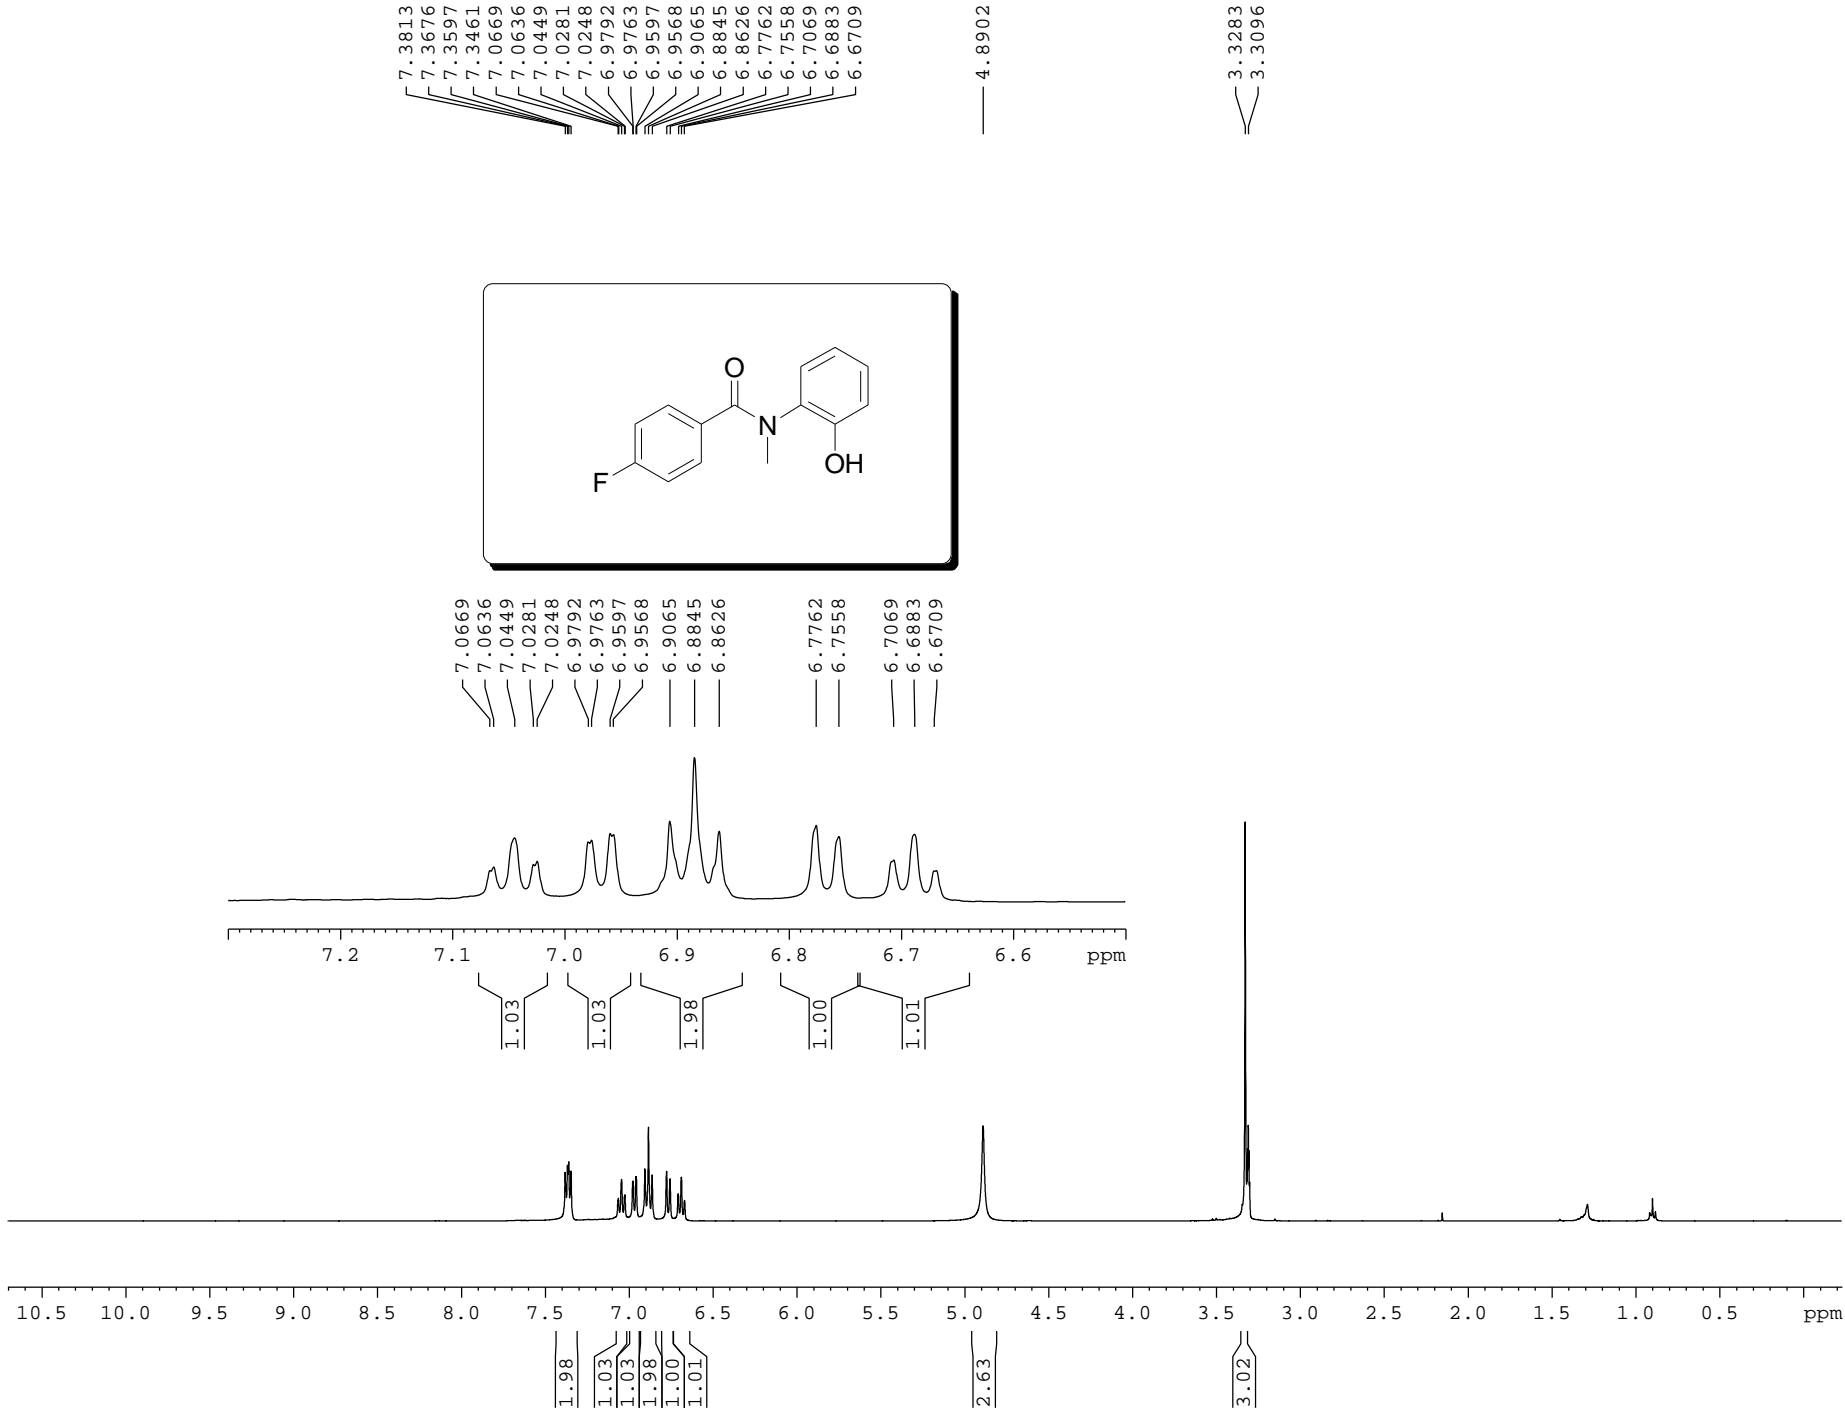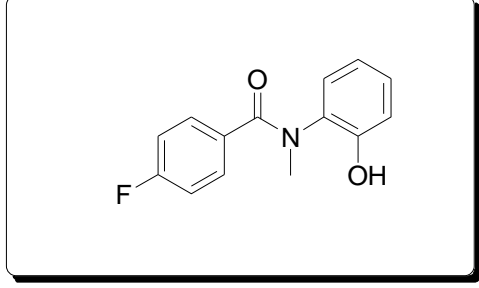

7.0669  
7.0636  
7.0449  
7.0281  
7.0248  
6.9792  
6.9763  
6.9597  
6.9568  
6.9065  
6.8845  
6.8626

6.7762  
6.7558

6.7069  
6.6883  
6.6709

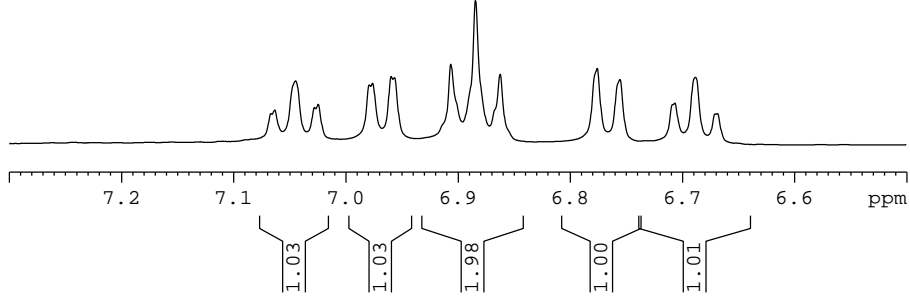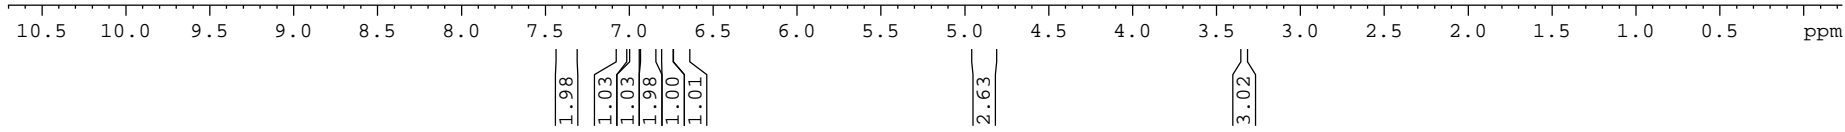

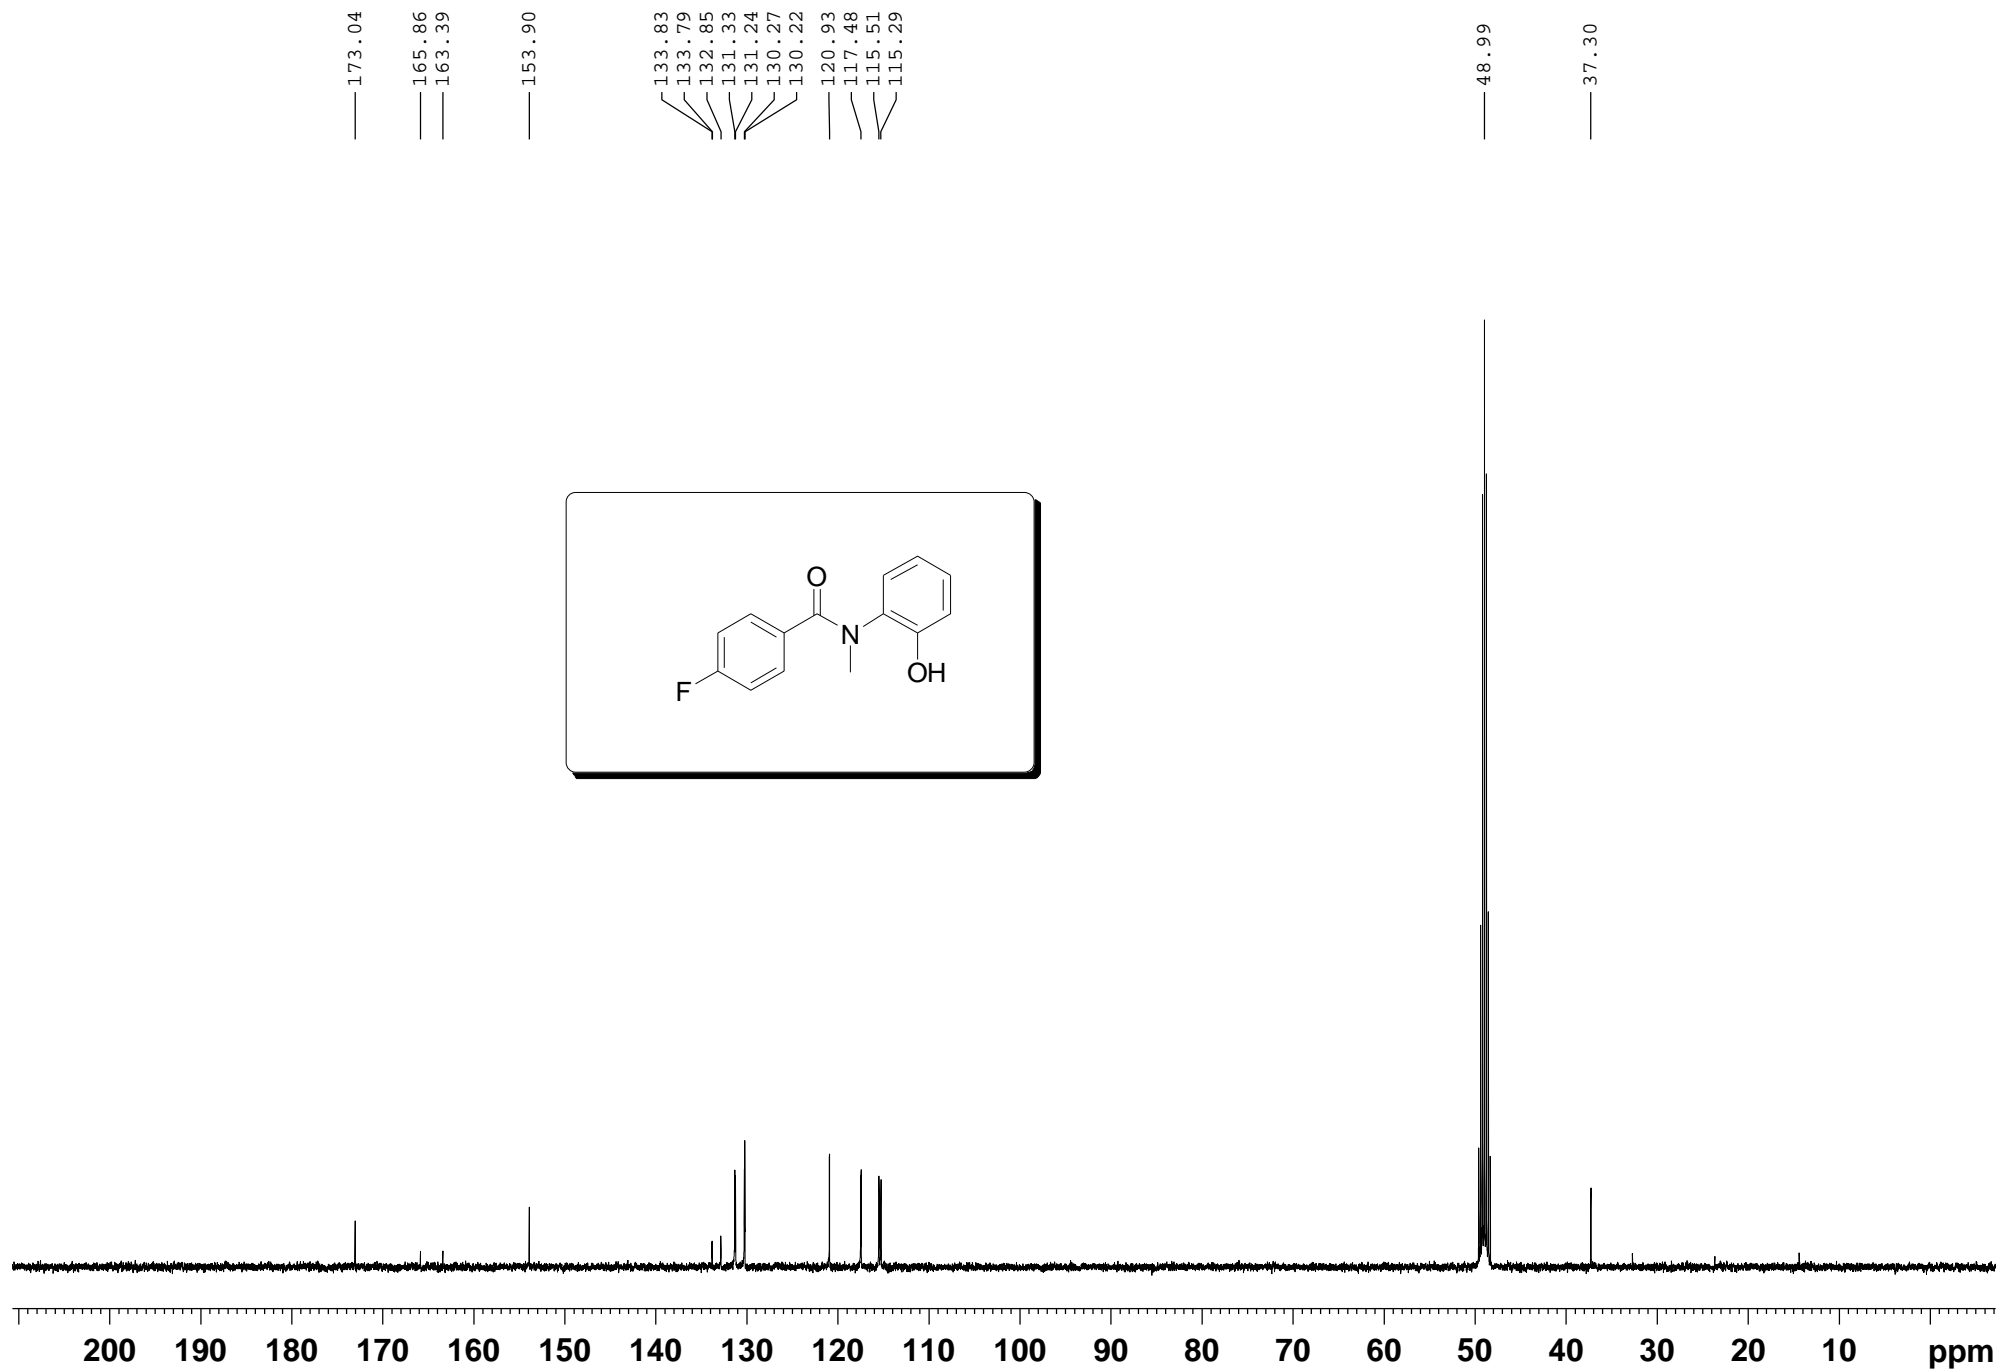



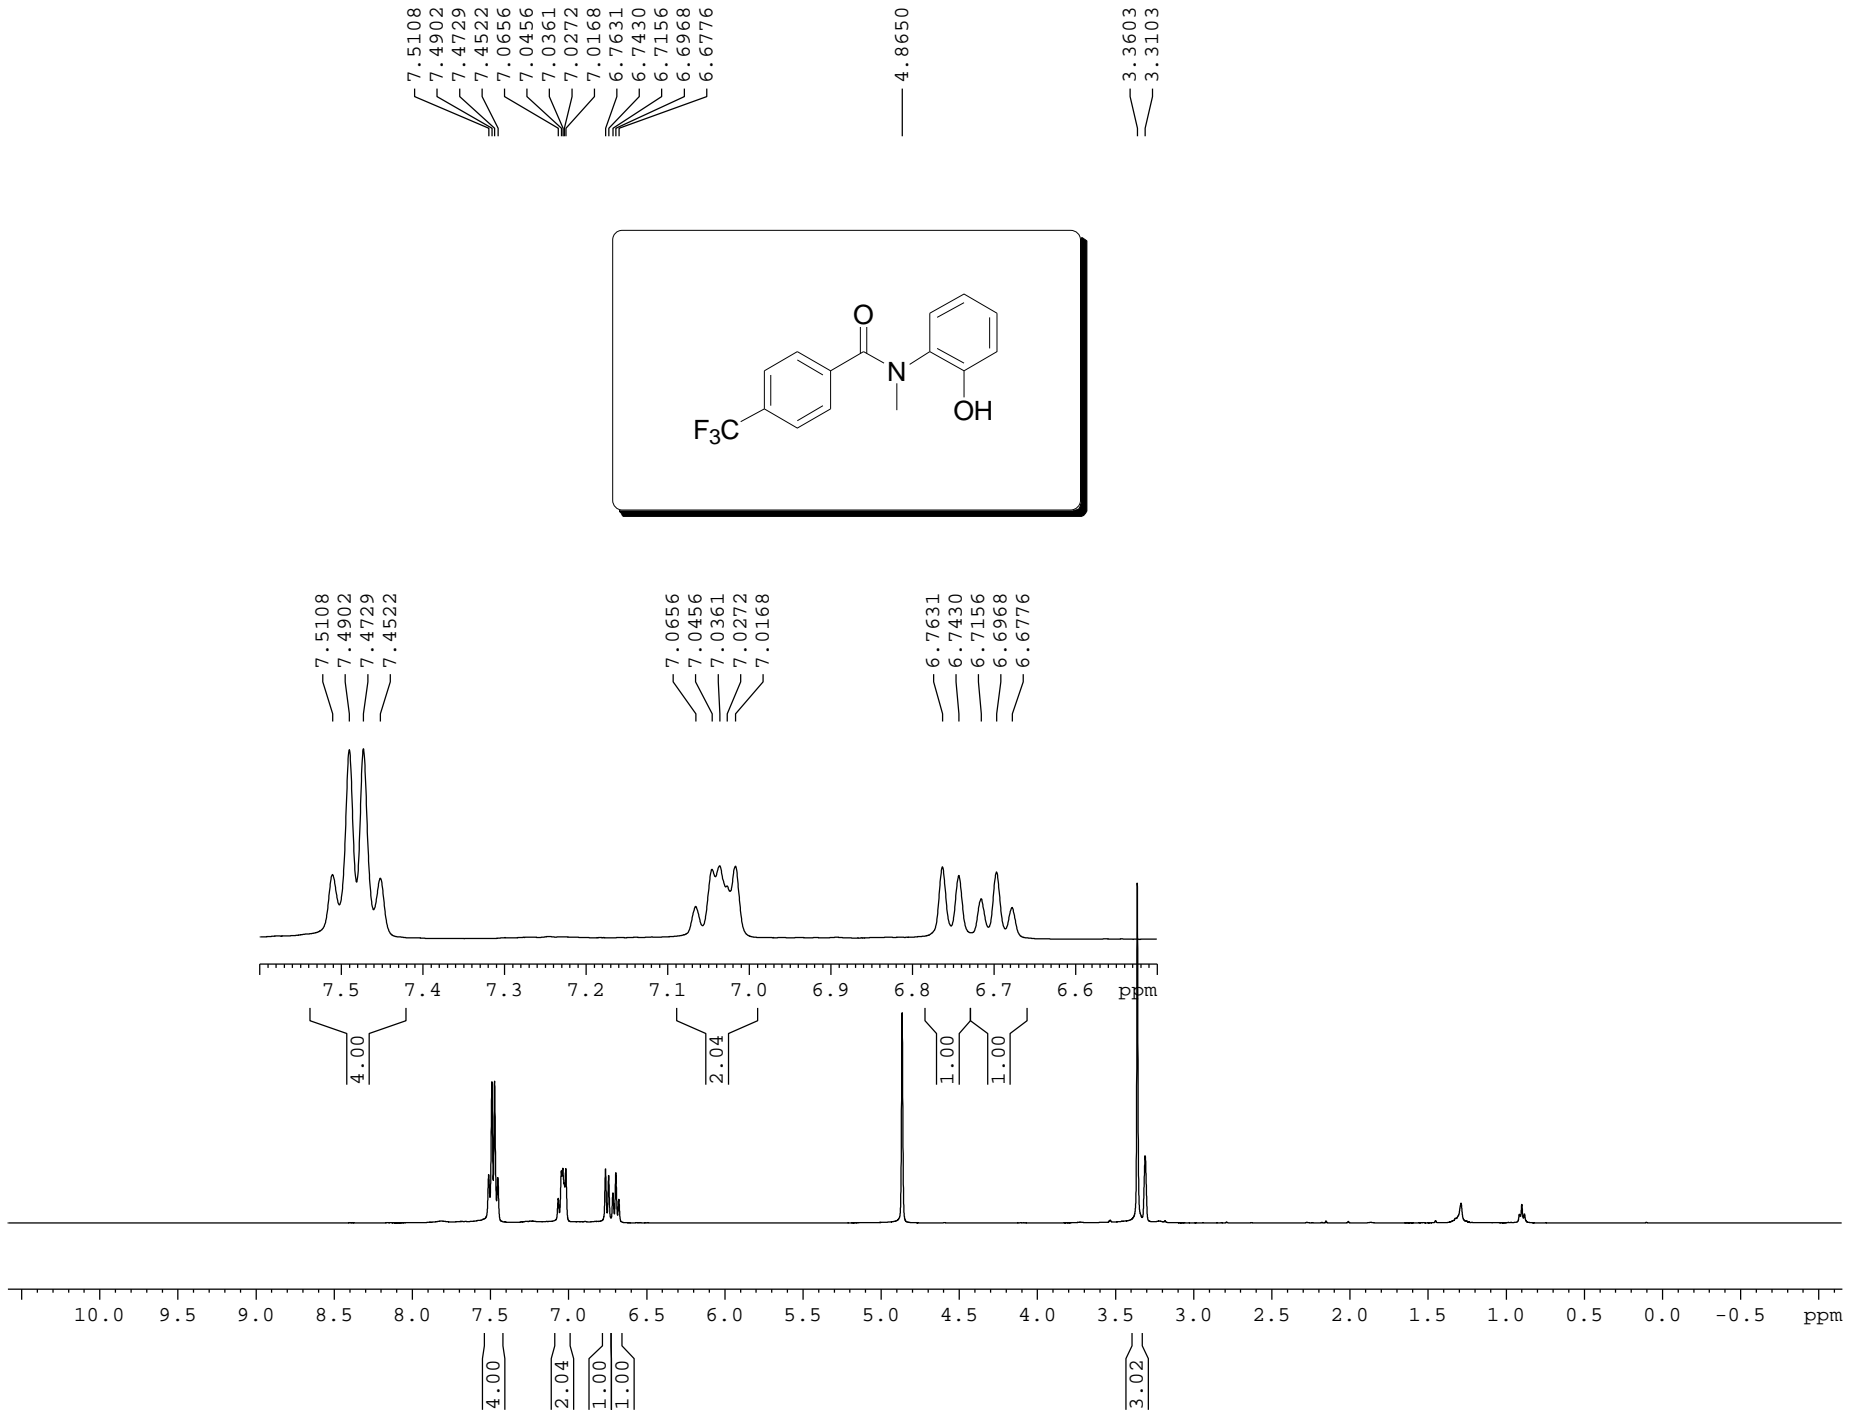

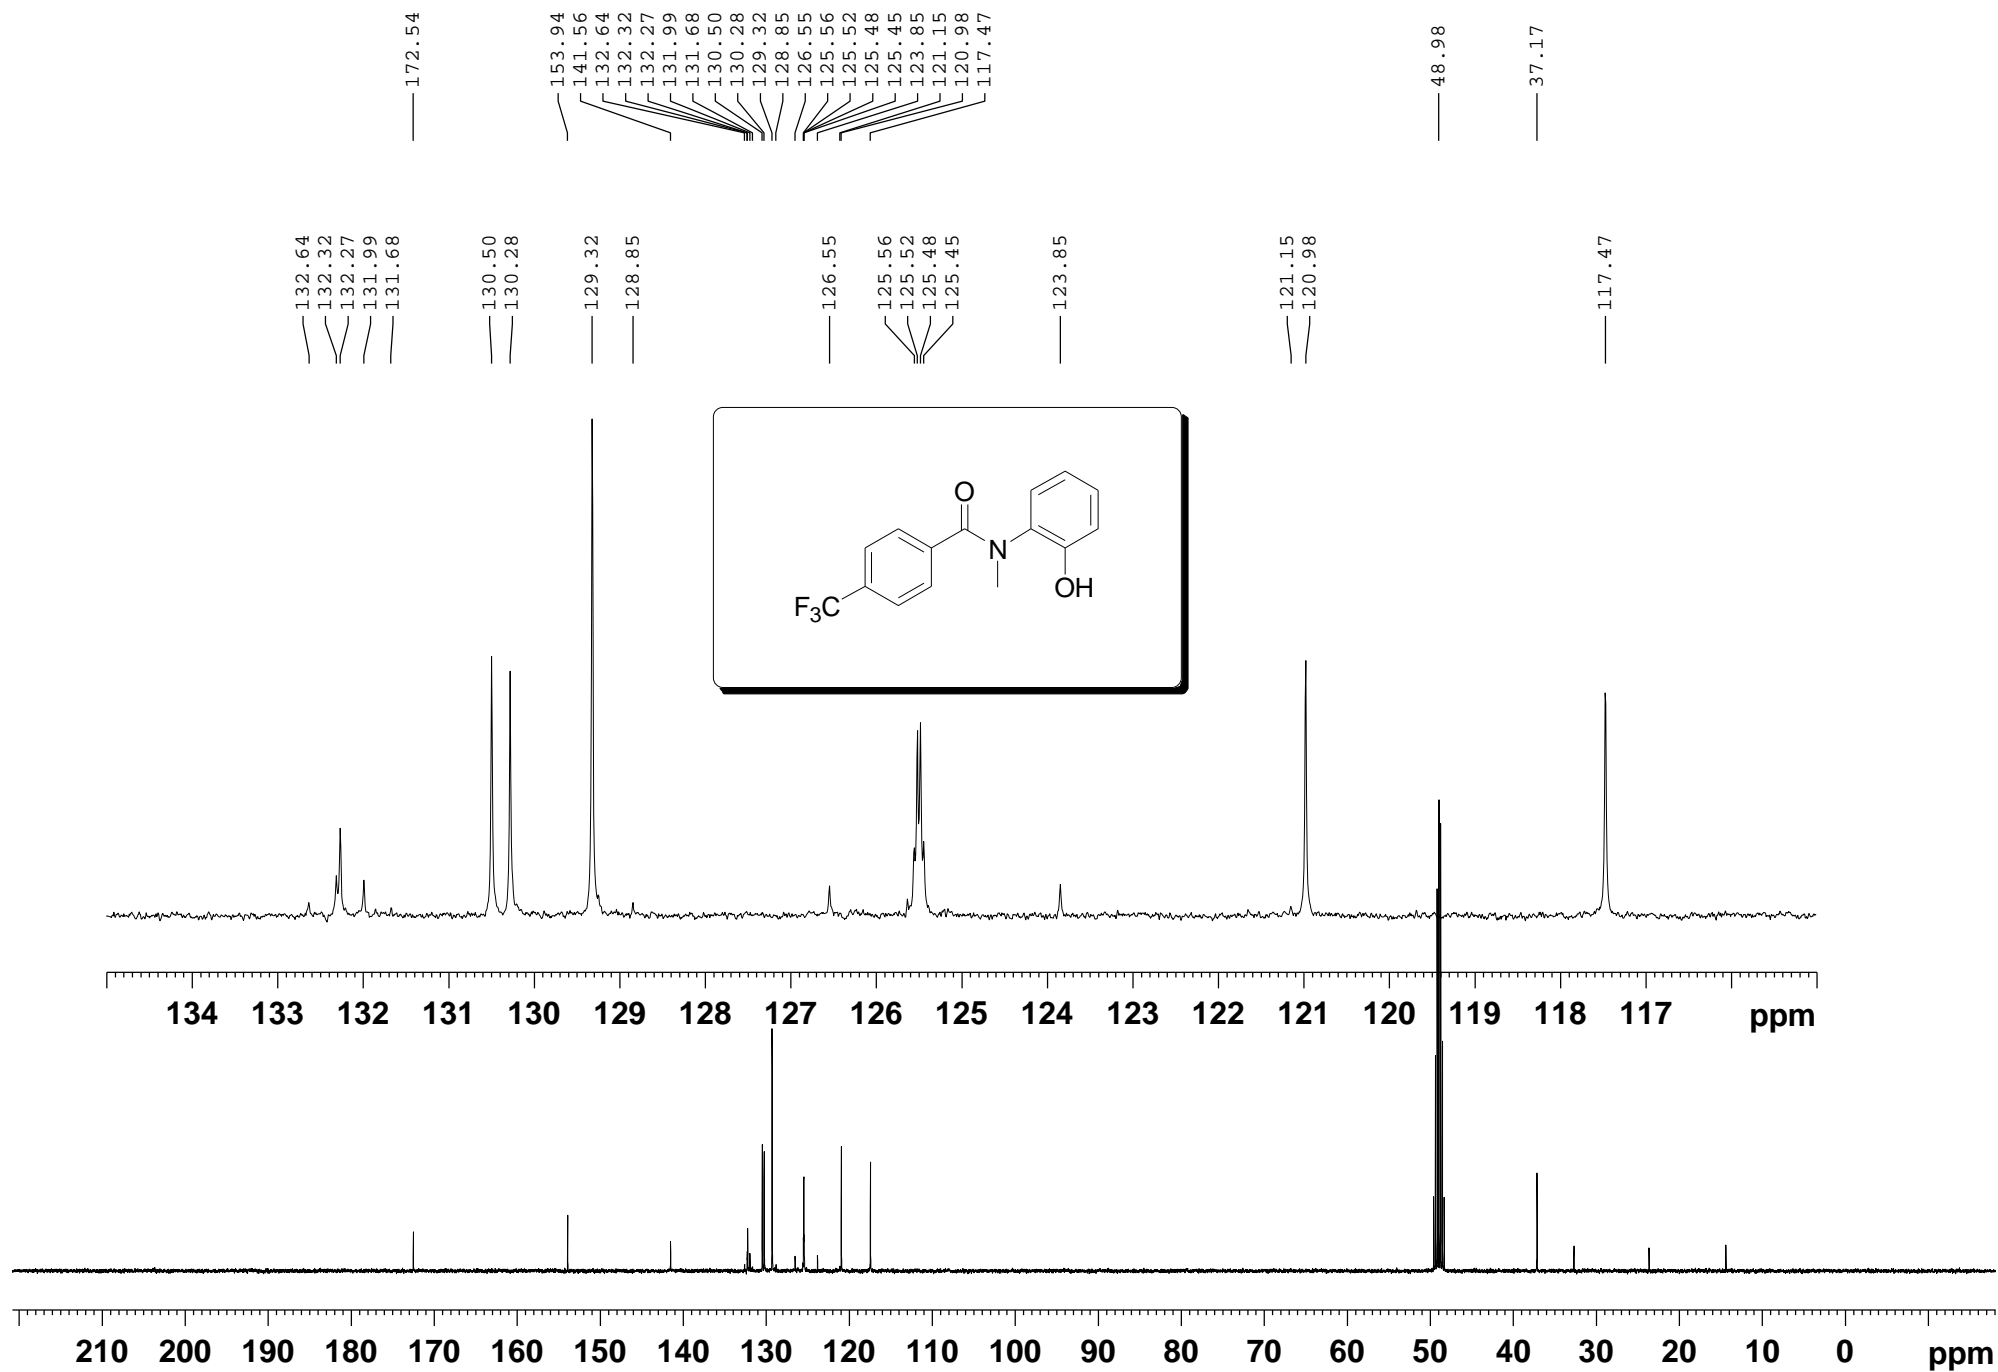

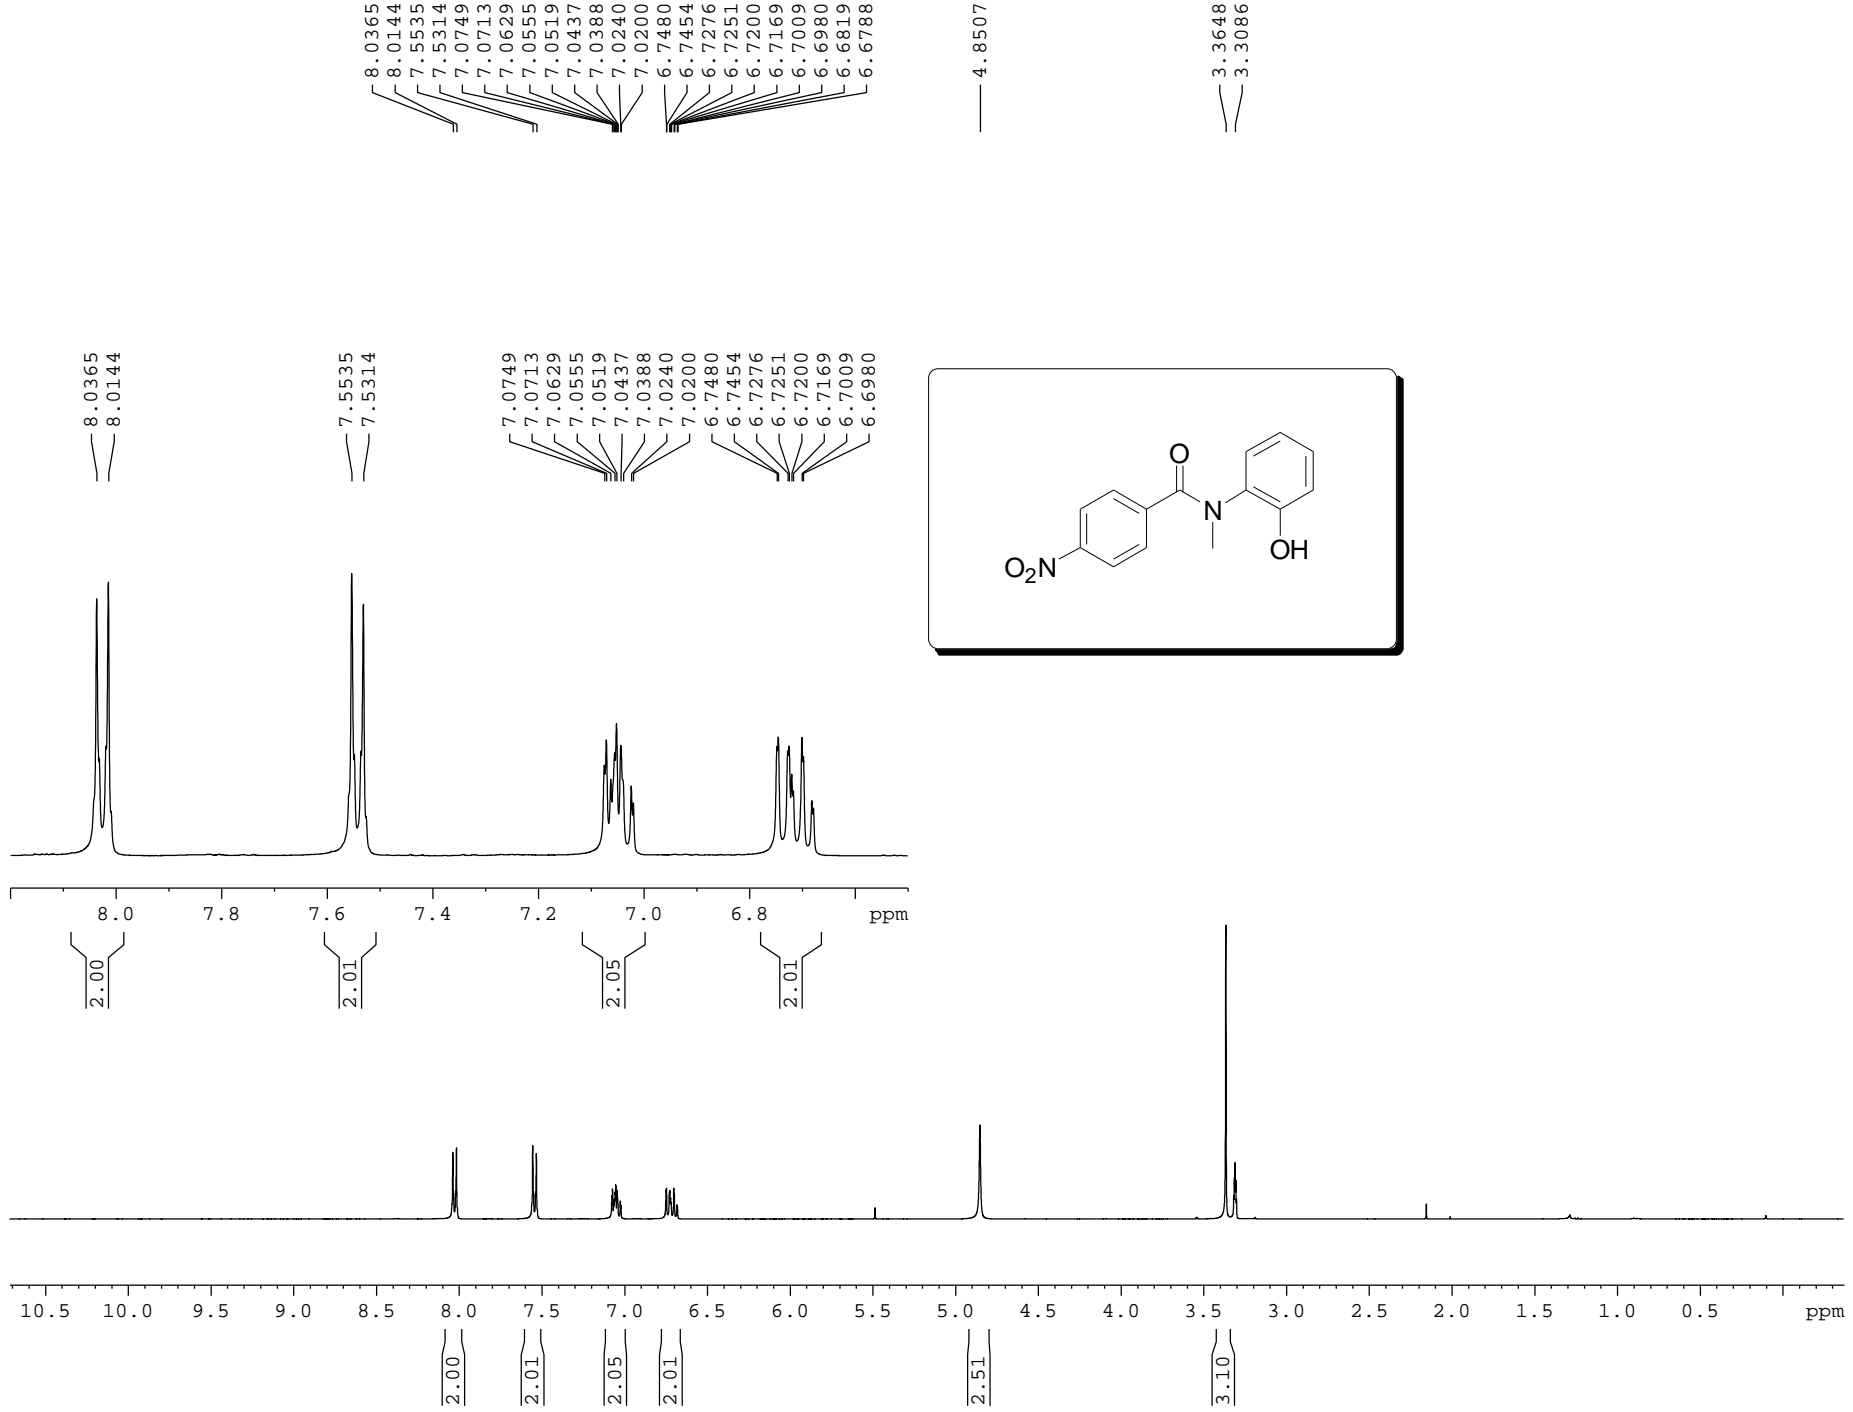

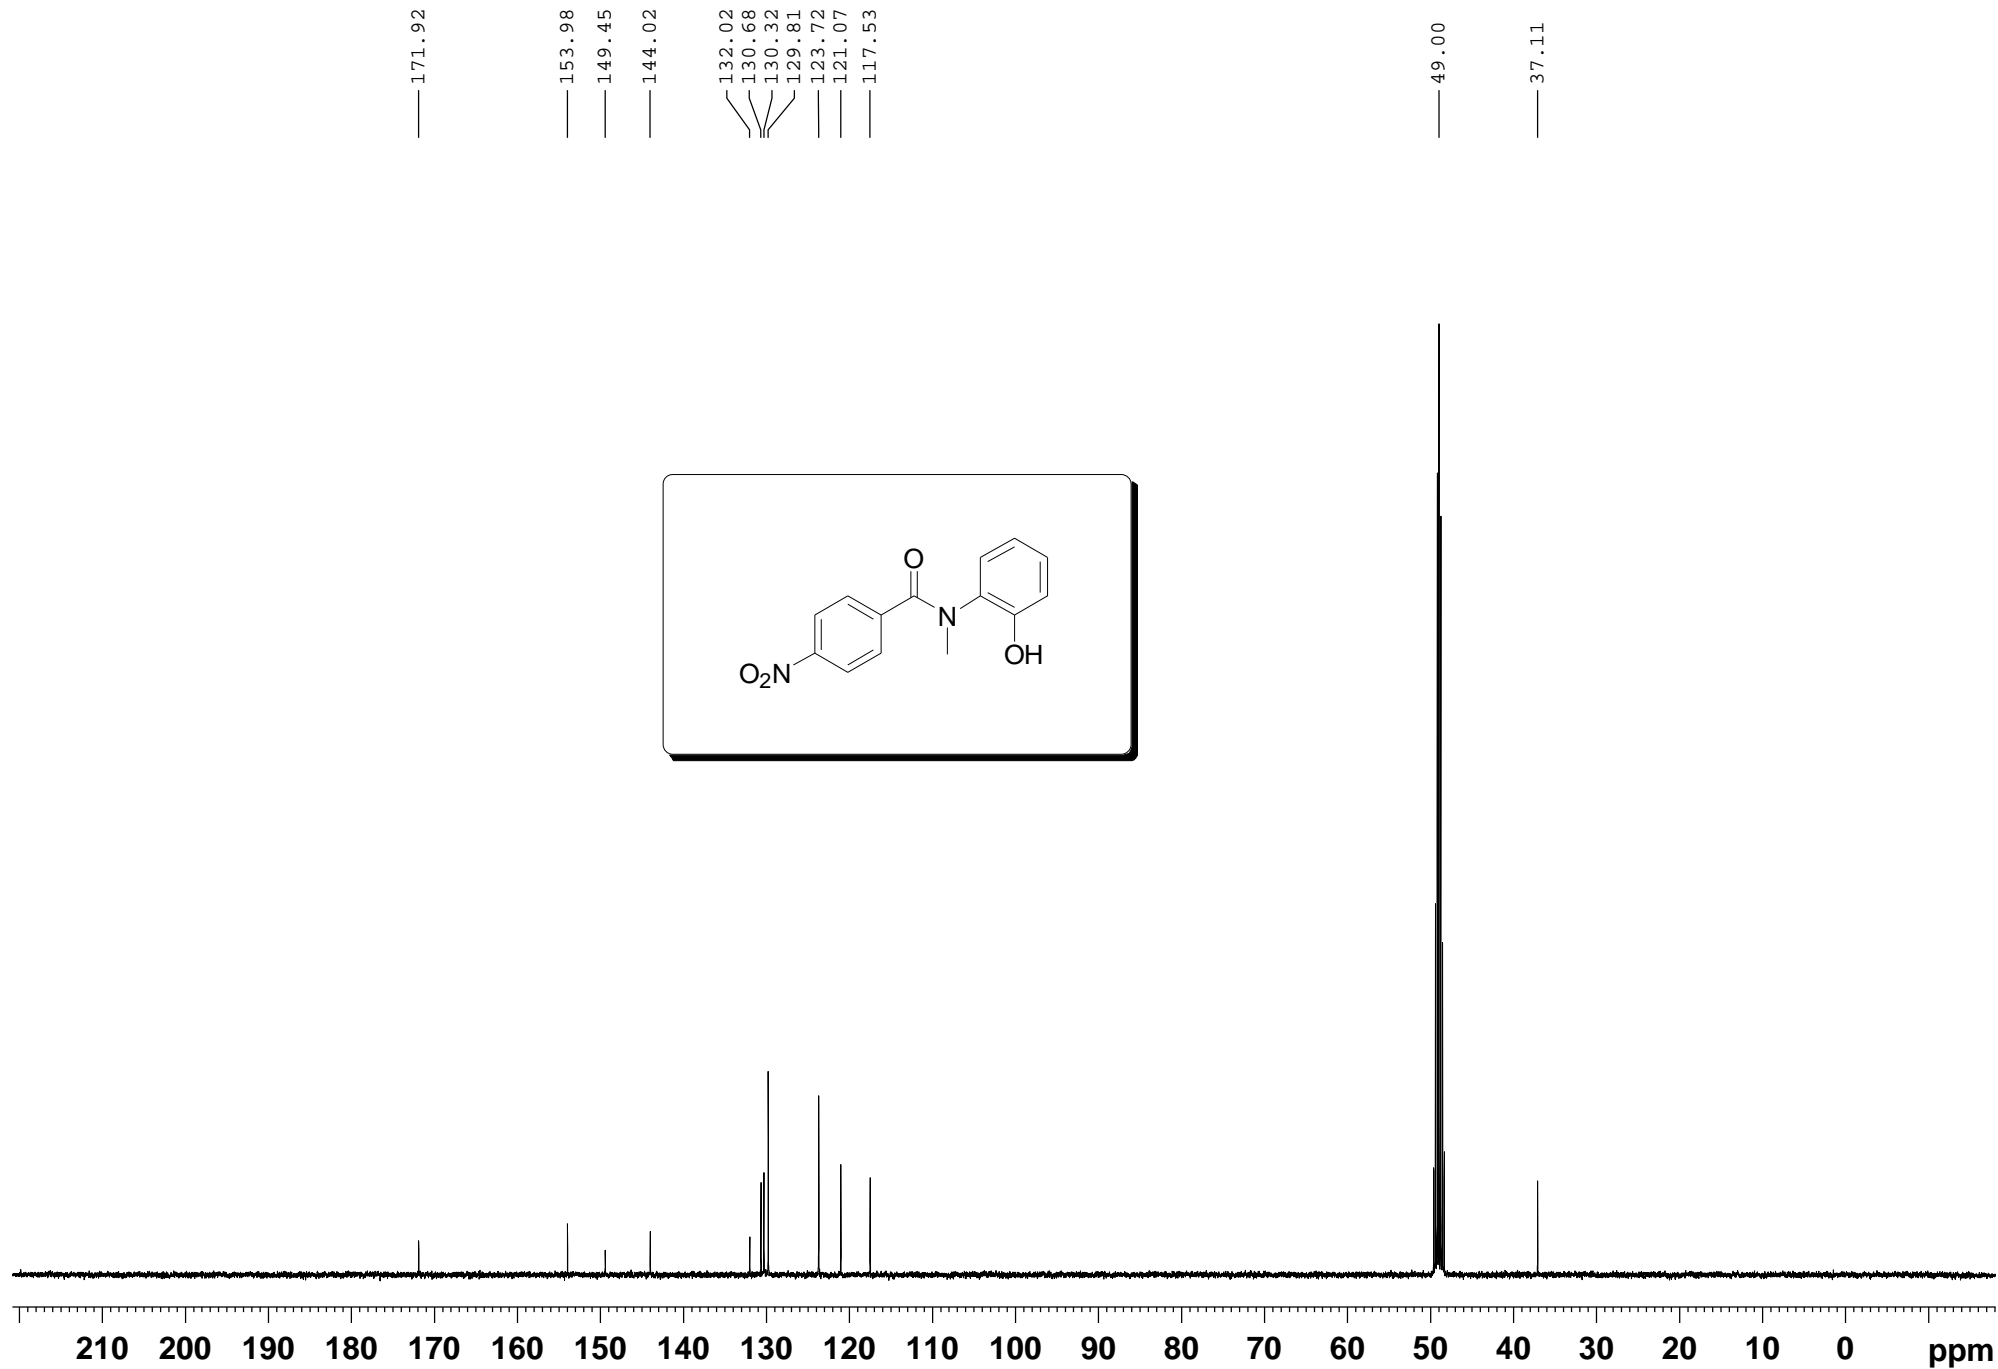

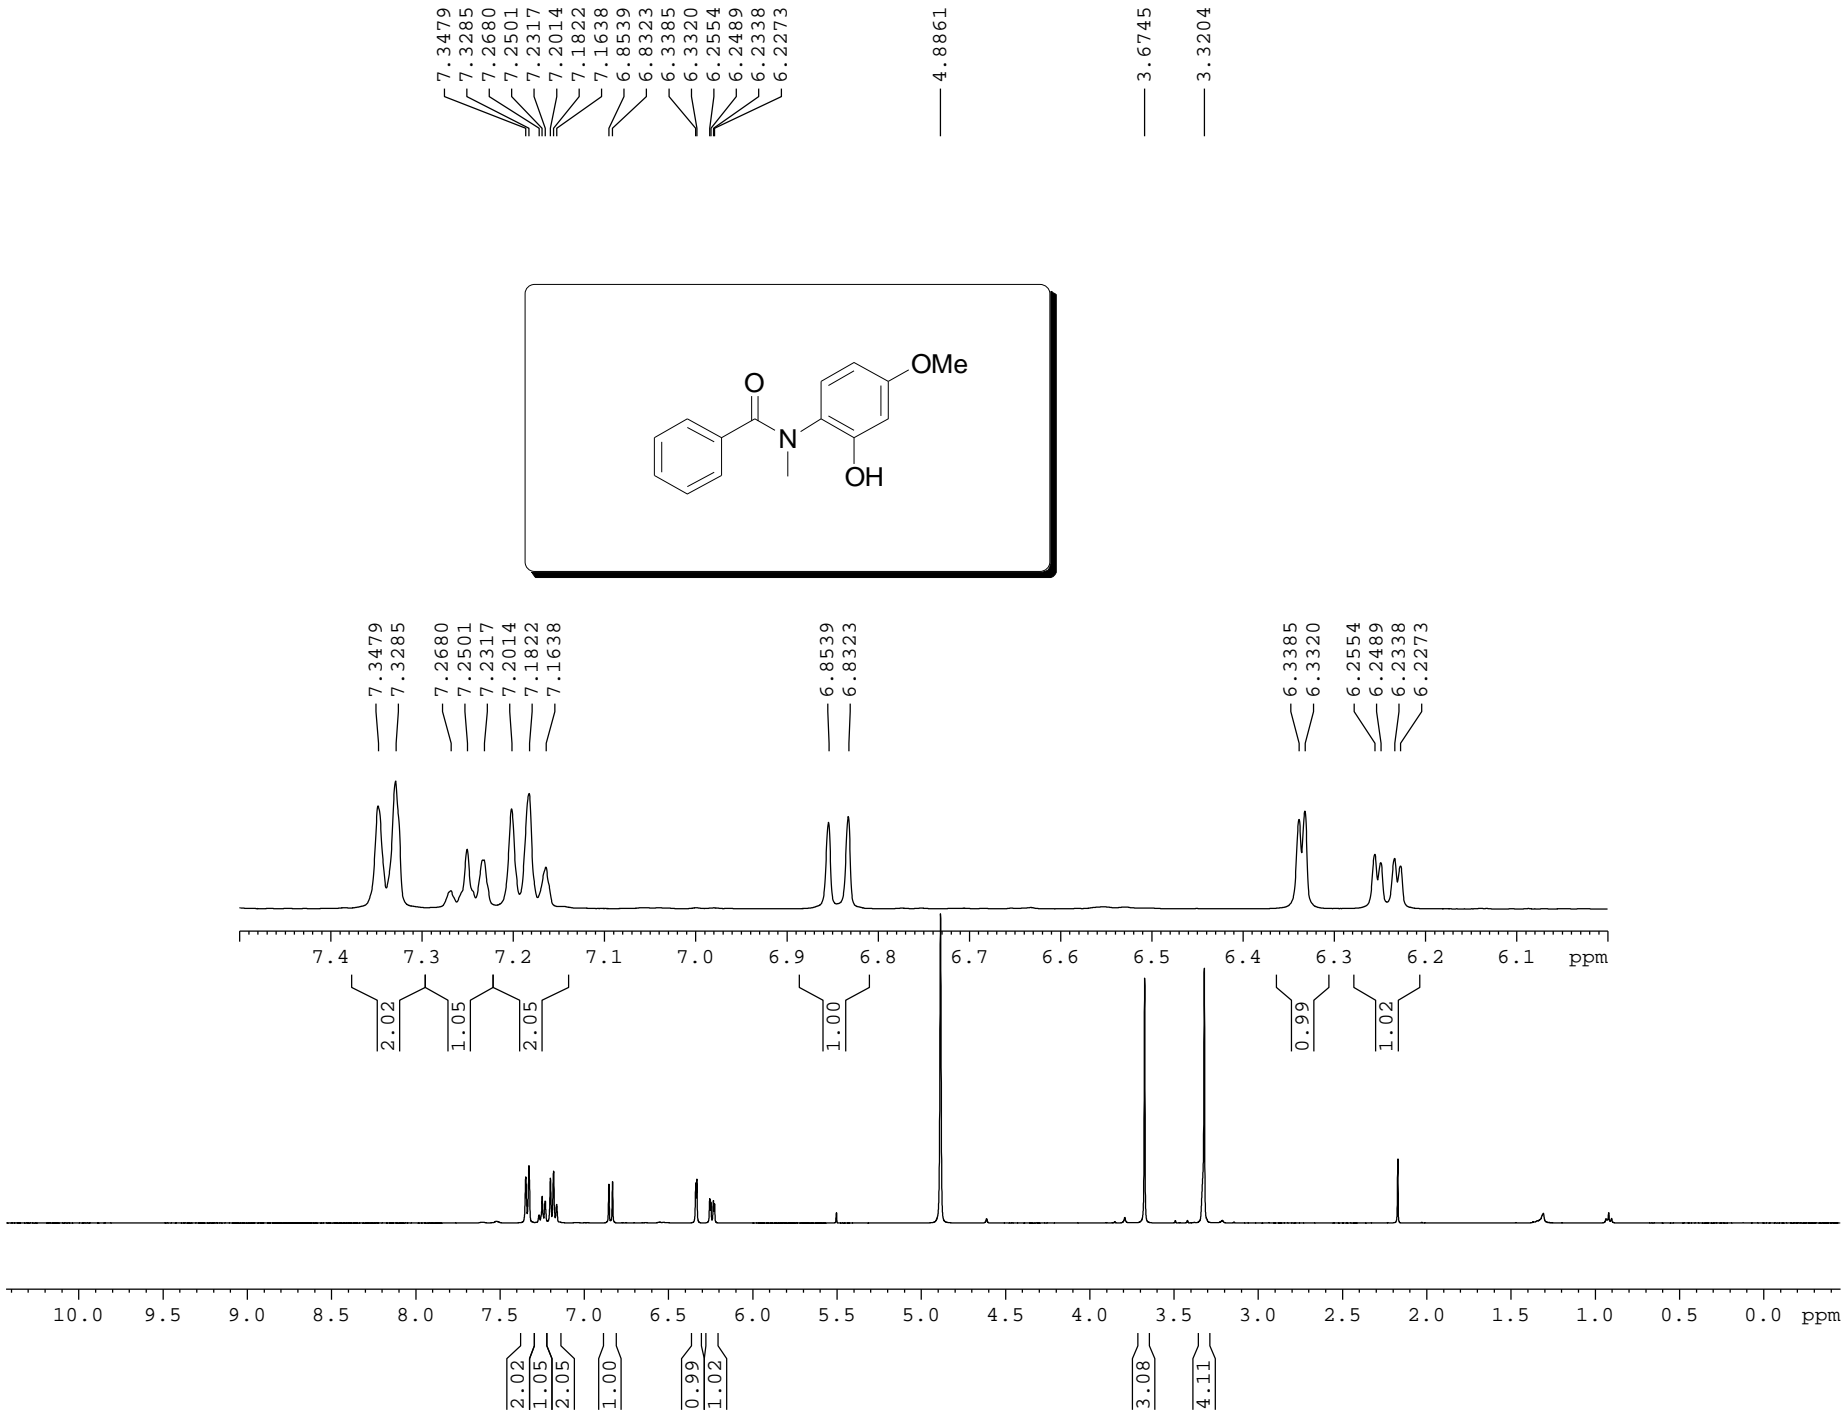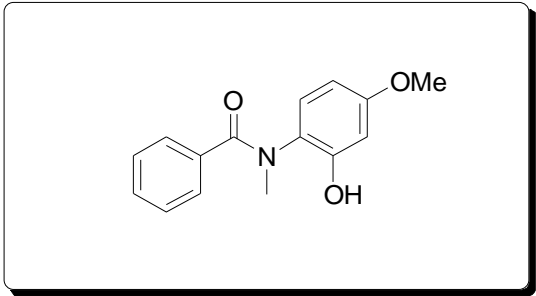

7.3479  
7.3285  
7.2680  
7.2501  
7.2317  
7.2014  
7.1822  
7.1638  
6.8539  
6.8323  
6.3385  
6.3320  
6.2554  
6.2489  
6.2338  
6.2273

4.8861

3.6745

3.3204

7.3479  
7.3285  
7.2680  
7.2501  
7.2317  
7.2014  
7.1822  
7.1638

6.8539  
6.8323

6.3385  
6.3320  
6.2554  
6.2489  
6.2338  
6.2273

2.02  
1.05  
2.05

1.00

0.99  
1.02

2.02  
1.05  
2.05  
1.00  
0.99  
1.02

3.08  
4.11

— 174.39

— 161.63

— 154.79

— 137.74

— 130.82

— 130.55

— 128.67

— 128.60

— 126.16

— 106.07

— 102.86

— 55.71

— 37.44

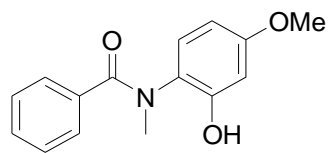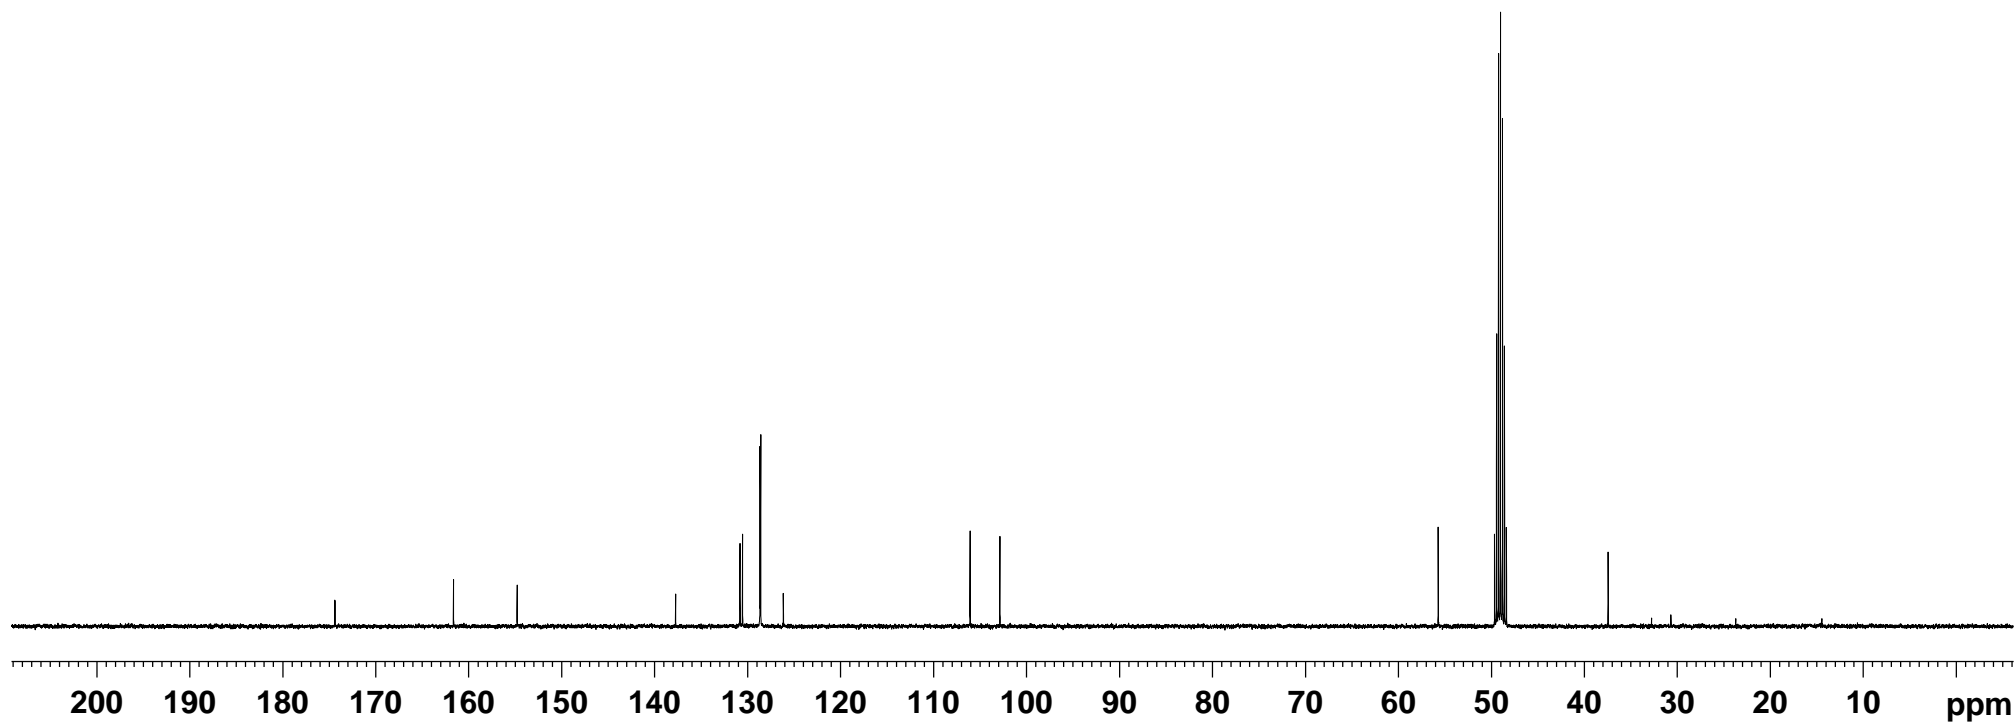

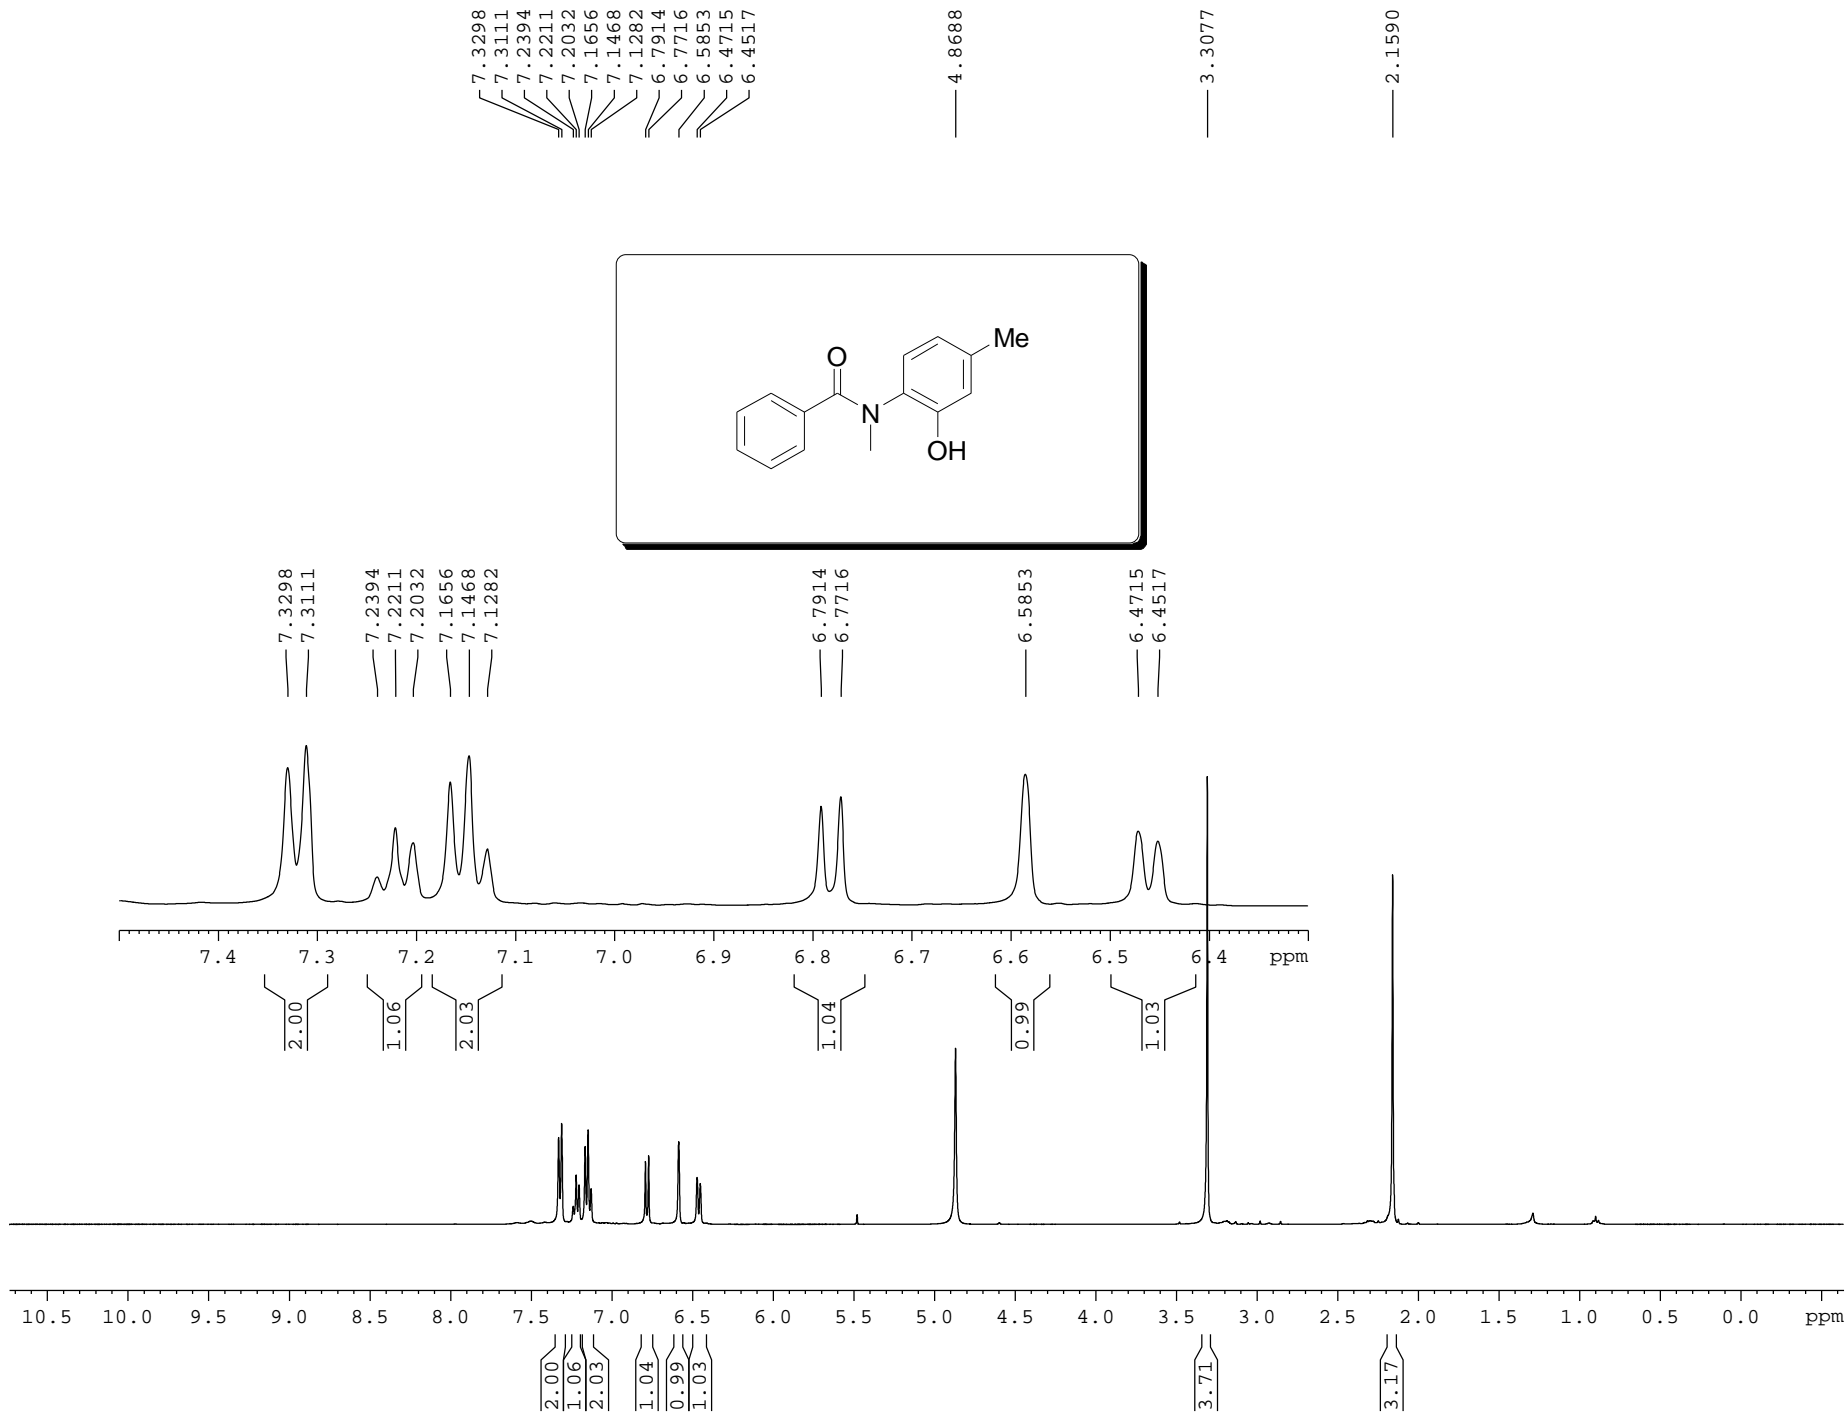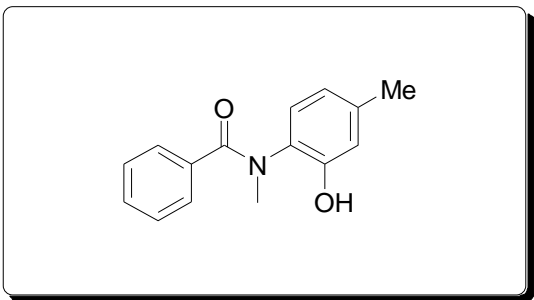

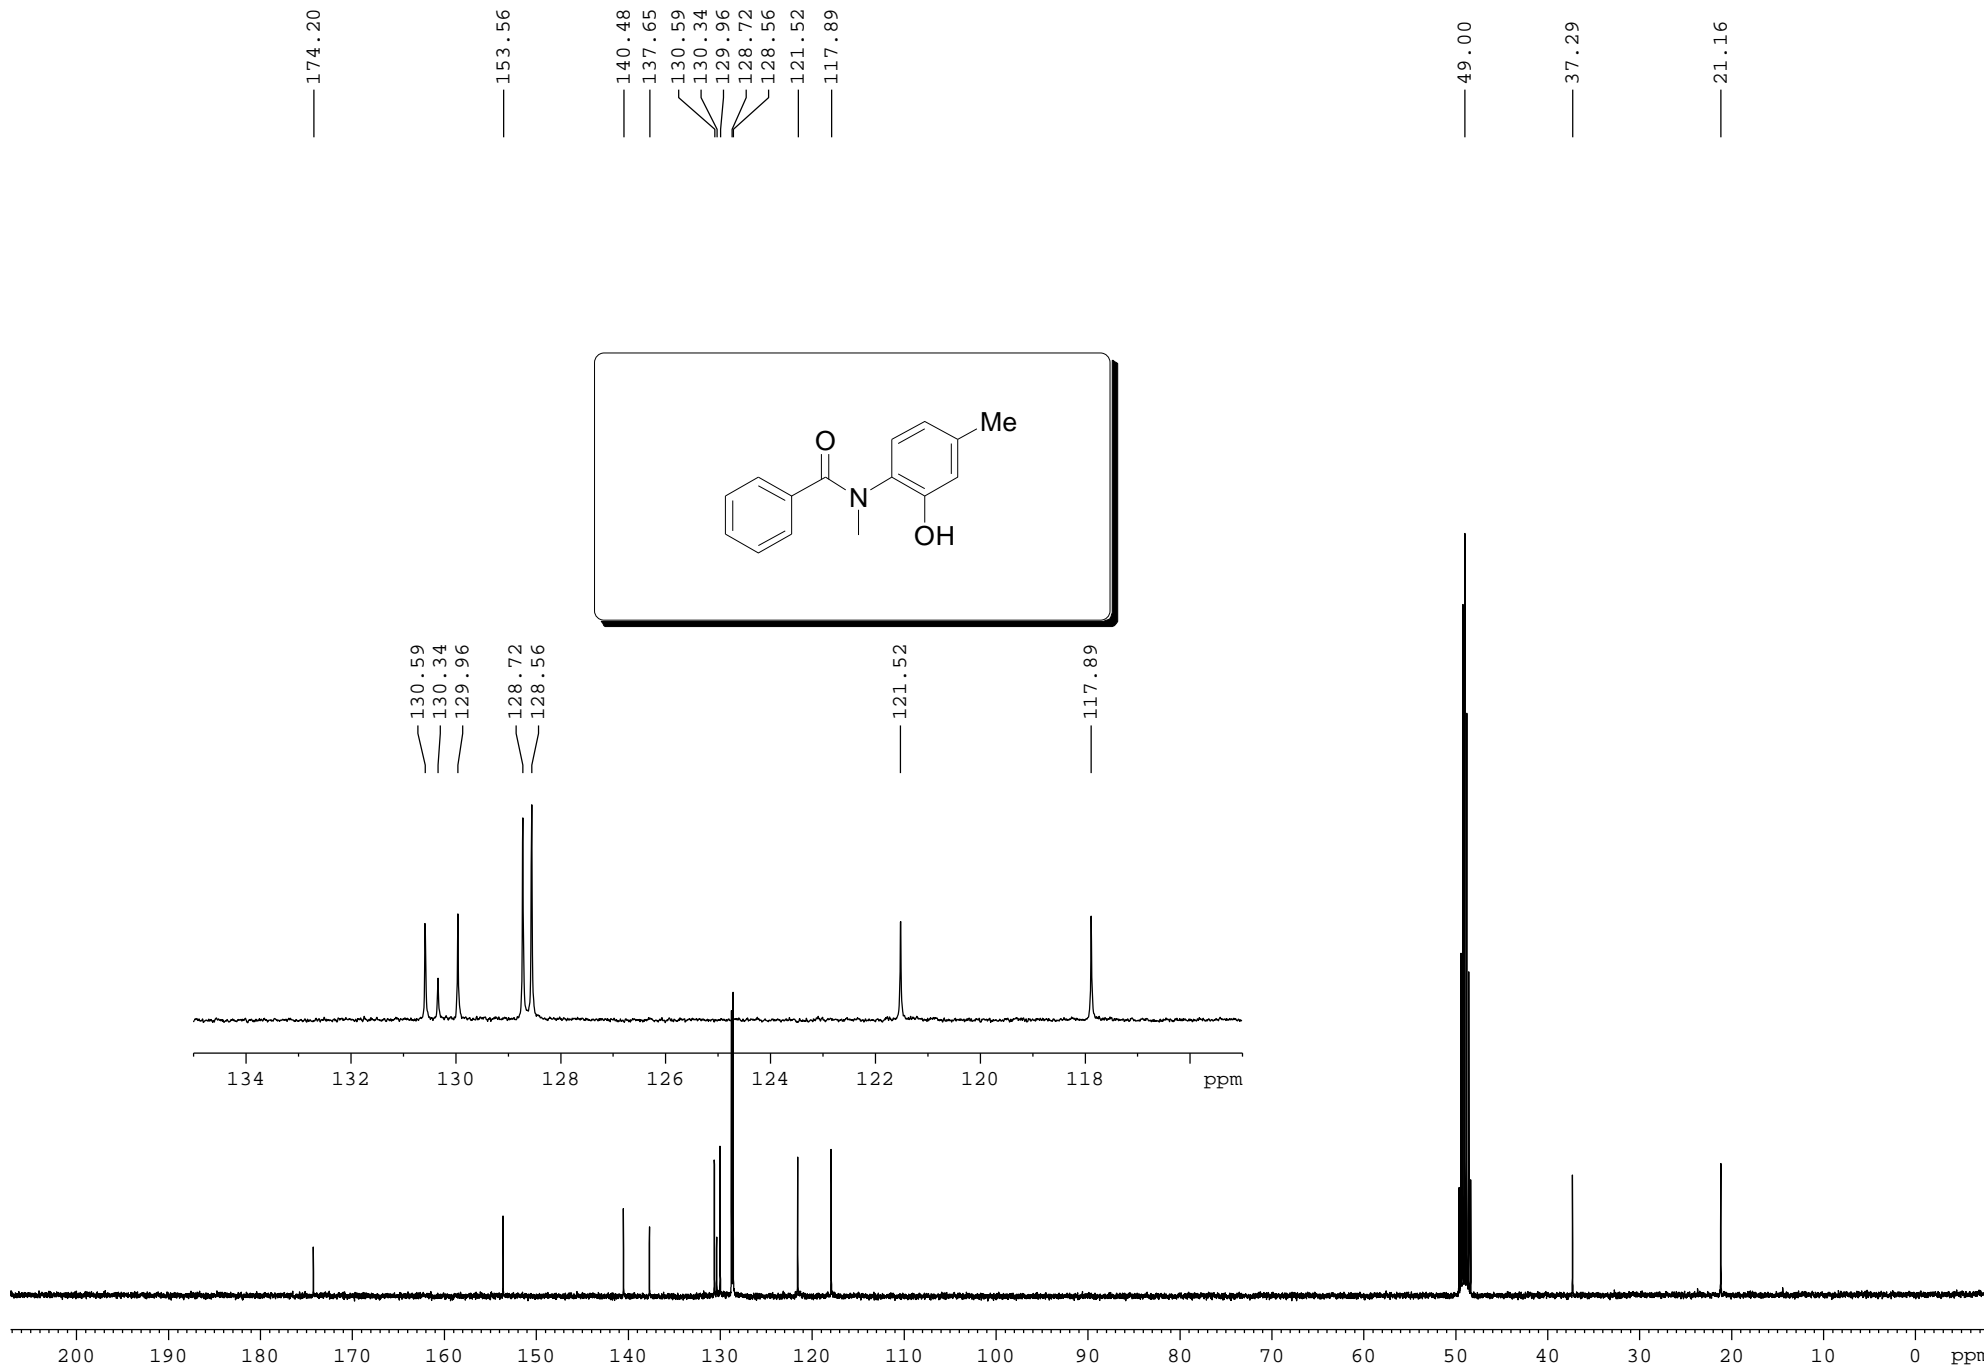



7.2199  
7.2001  
6.9741  
6.9543  
6.7703  
6.7505  
6.5936  
6.4767  
6.4569

4.8659

3.3085  
3.2920

2.2253  
2.1714

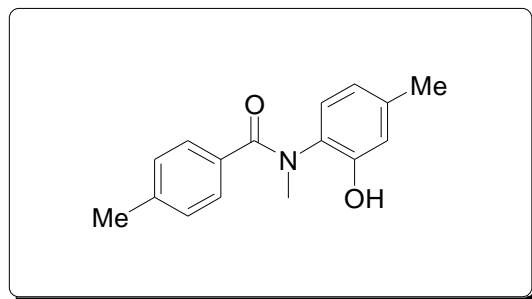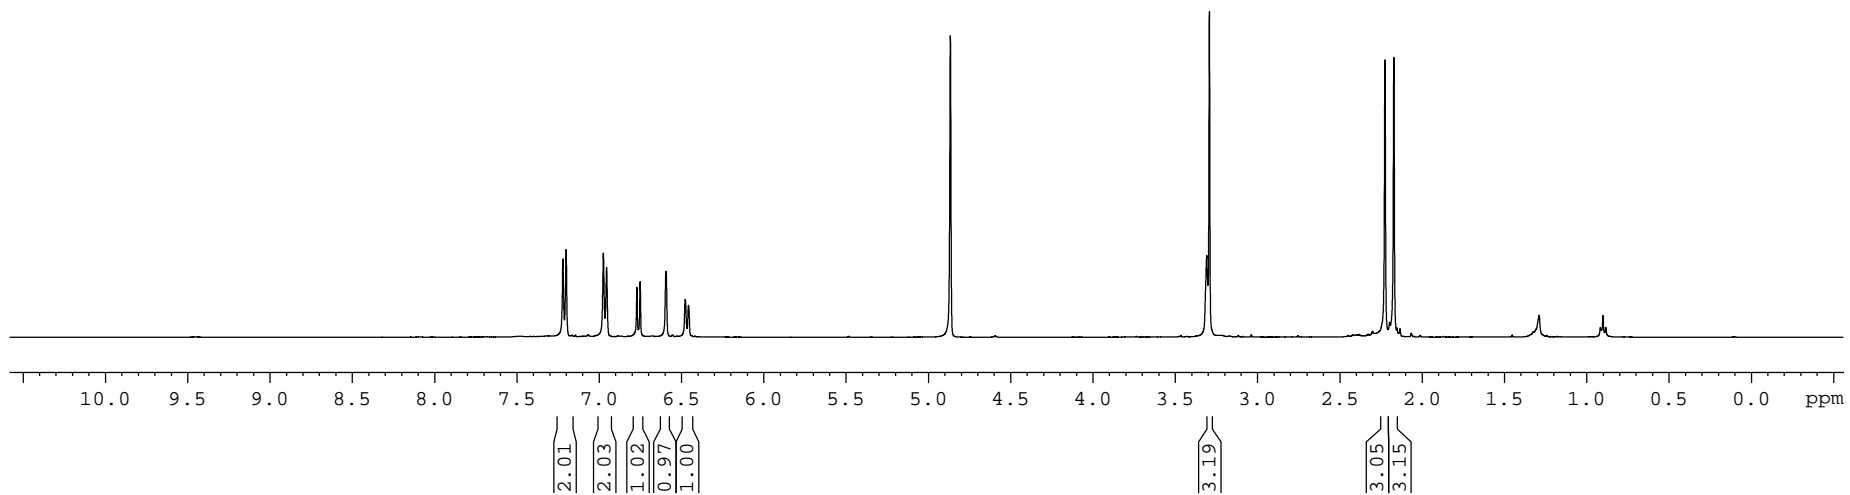

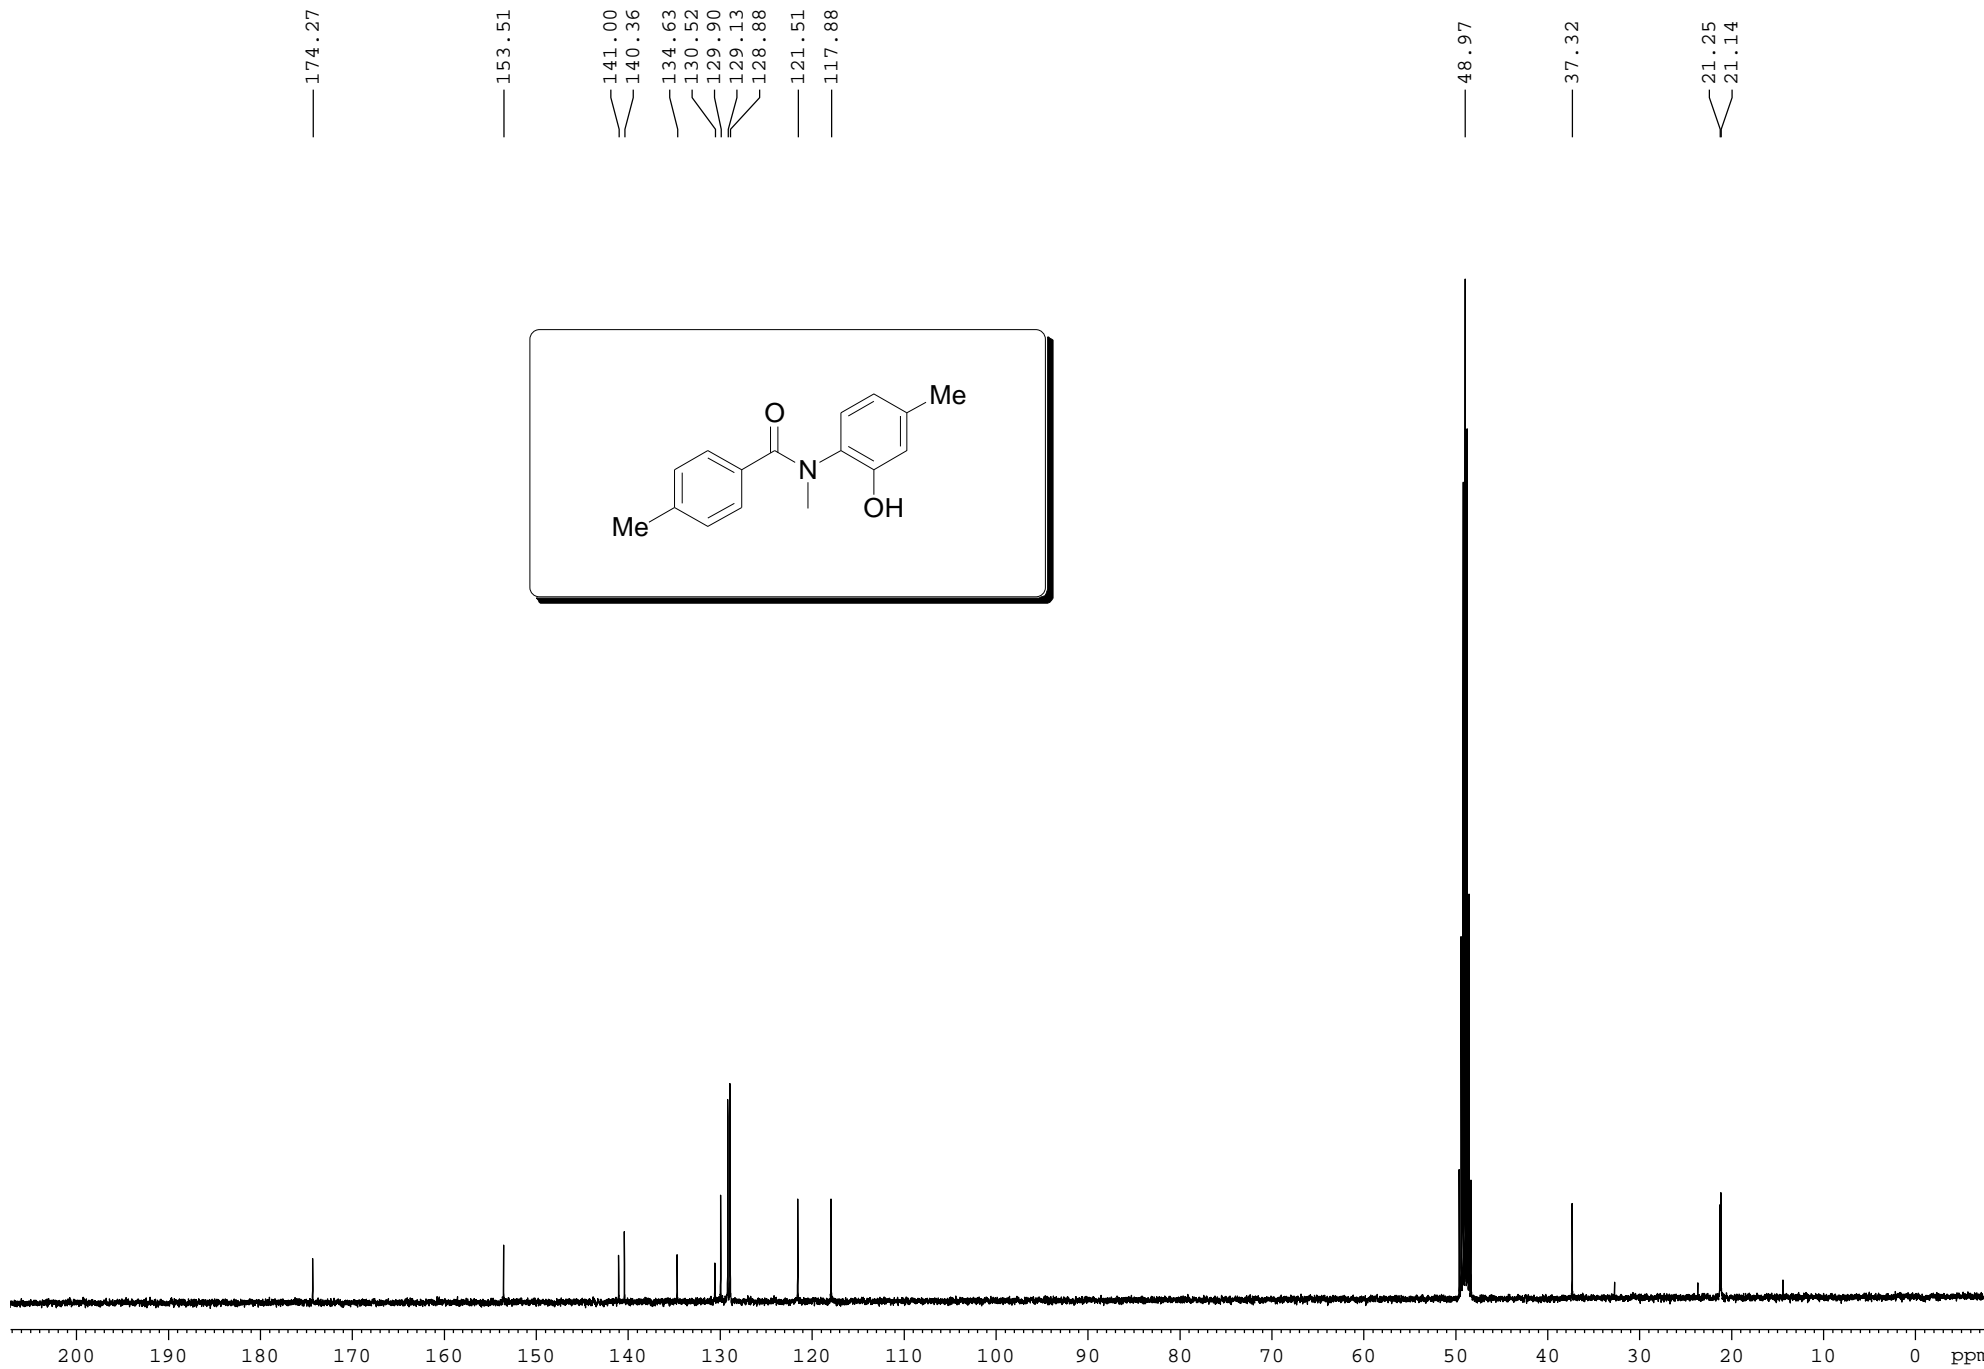

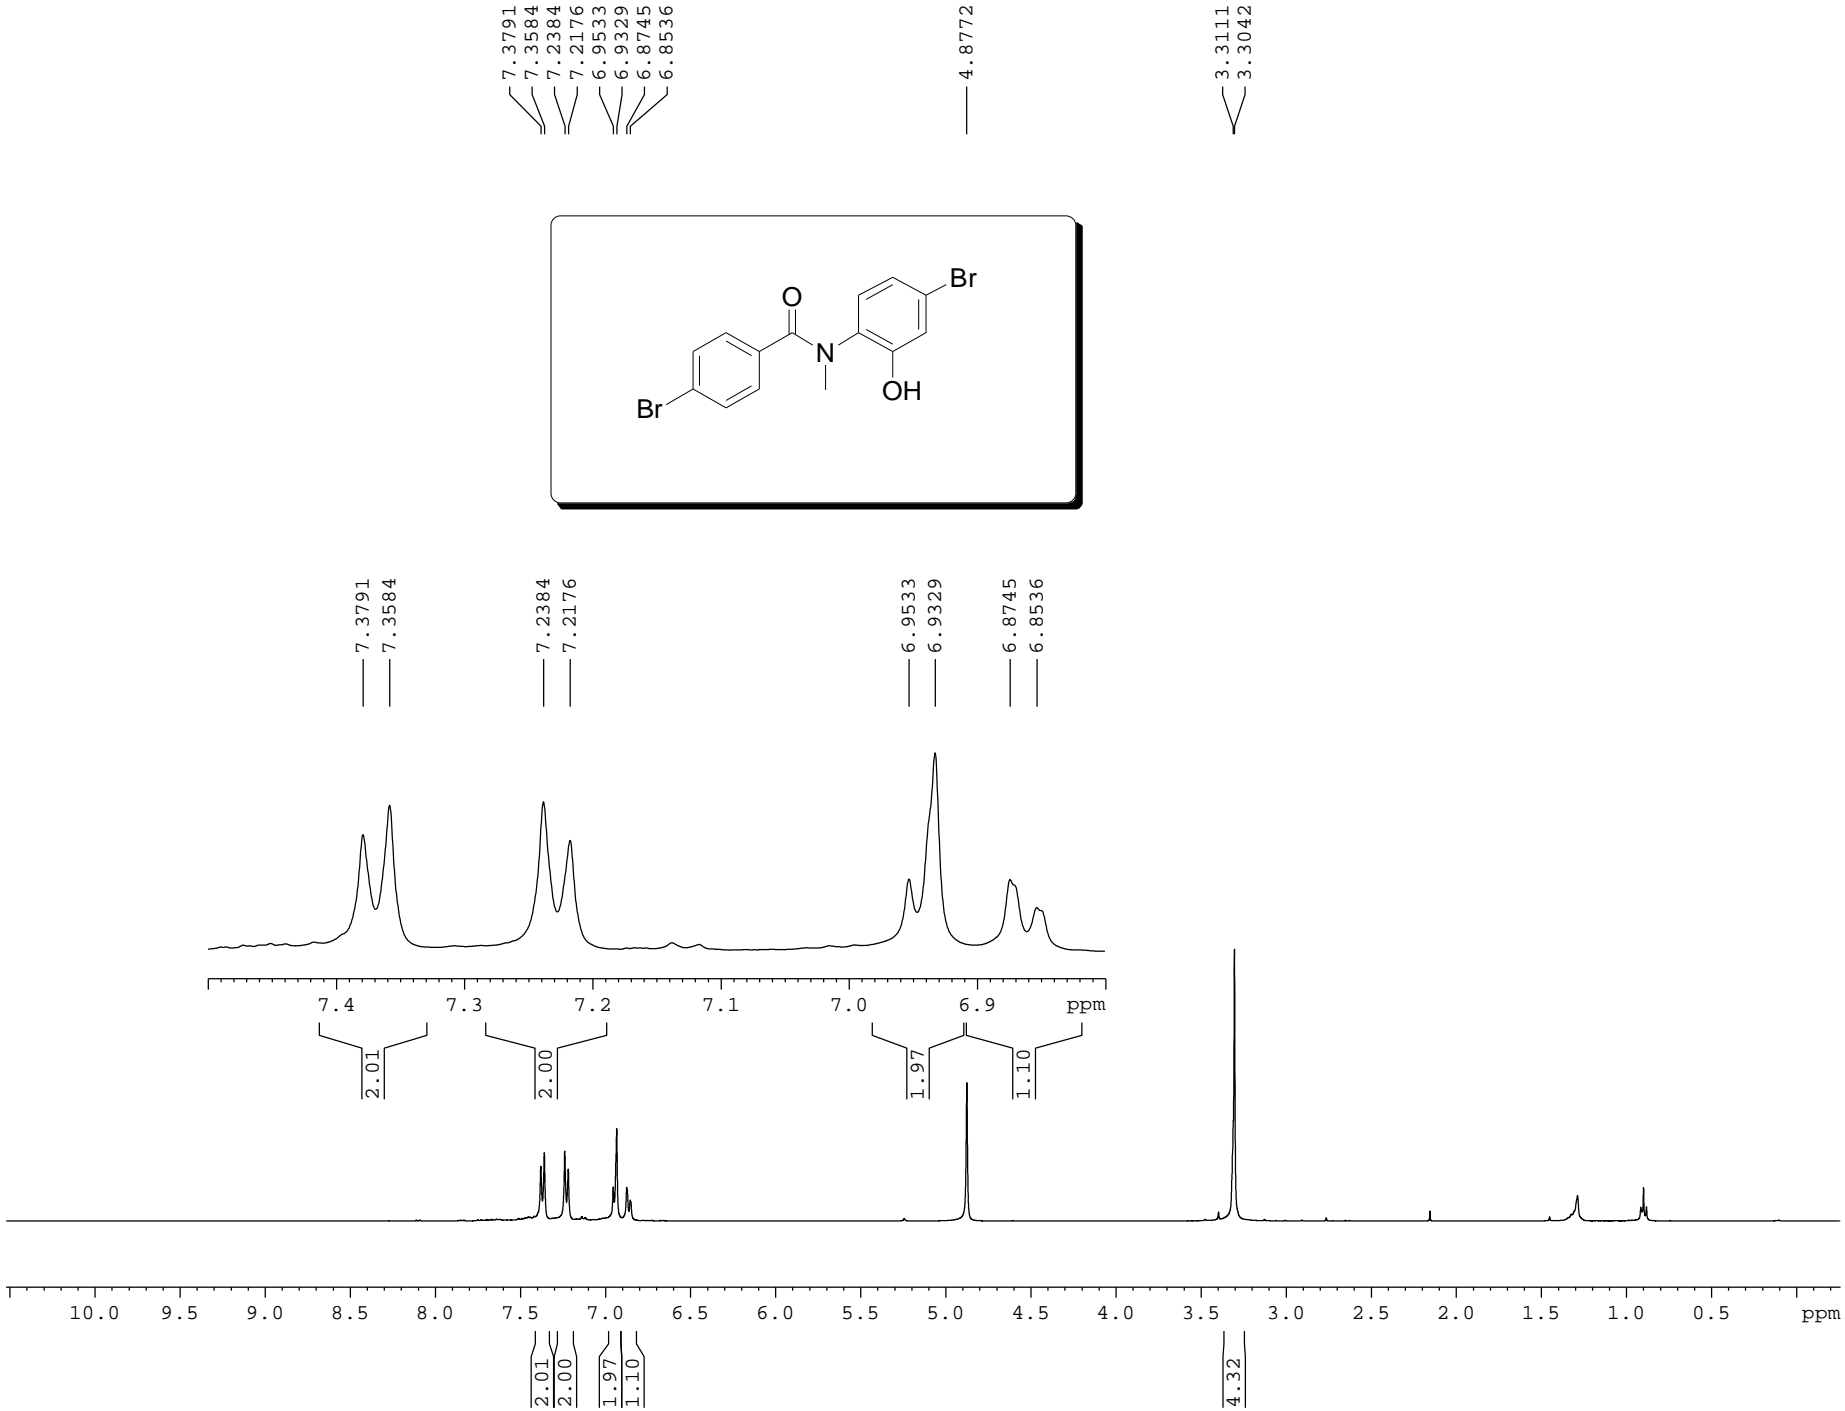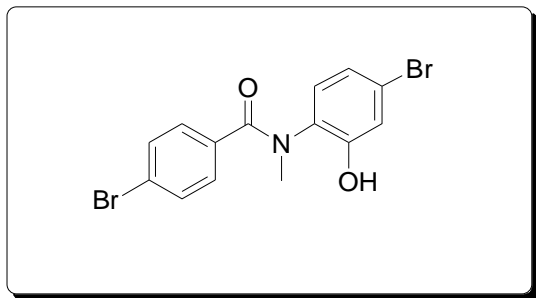

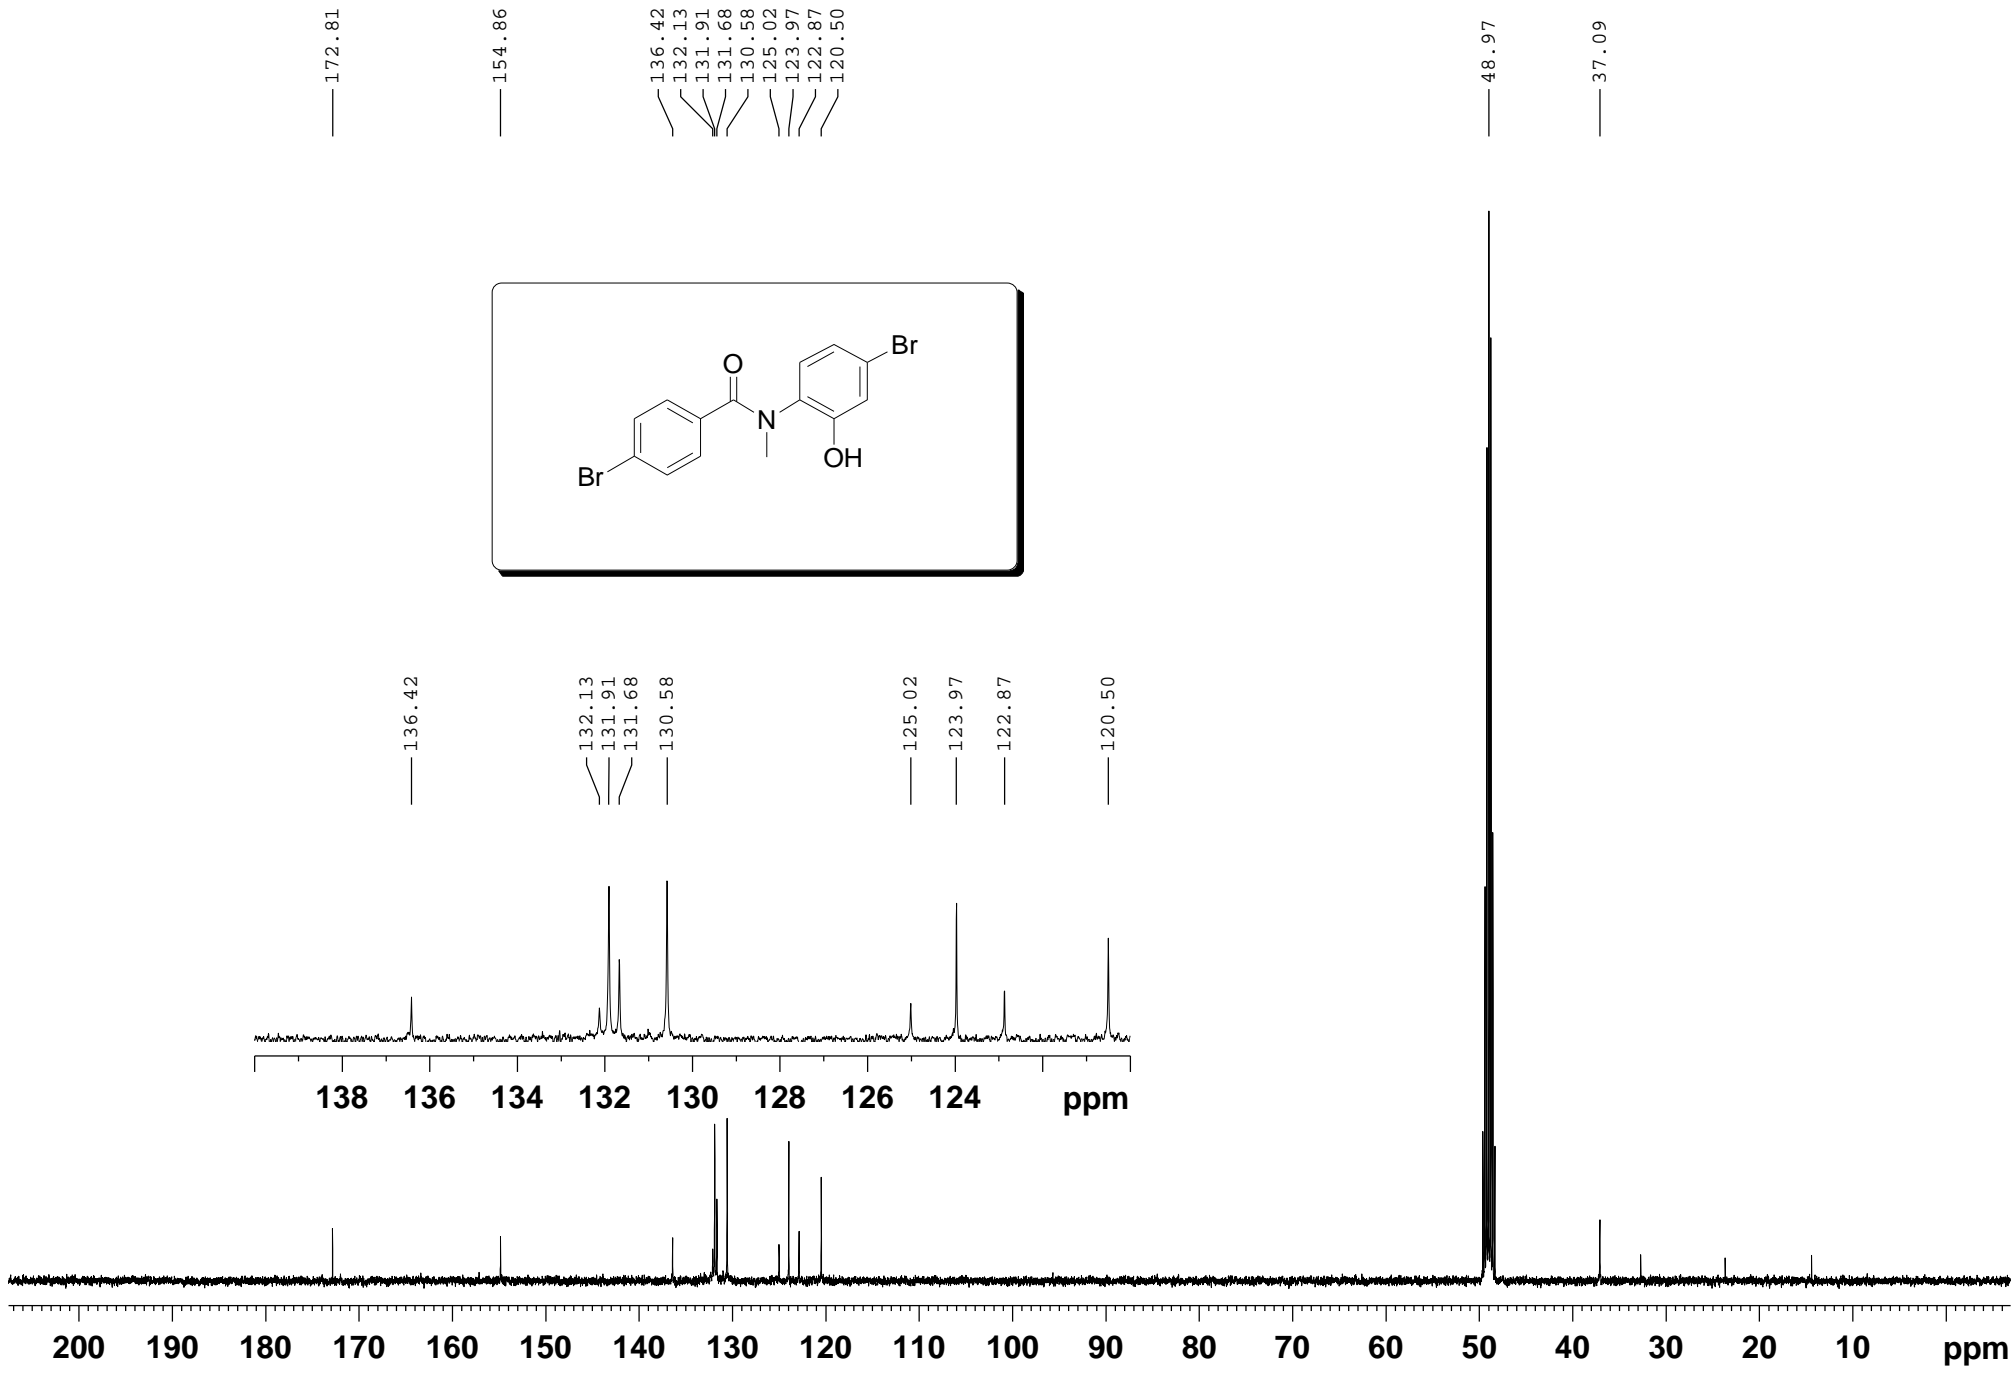

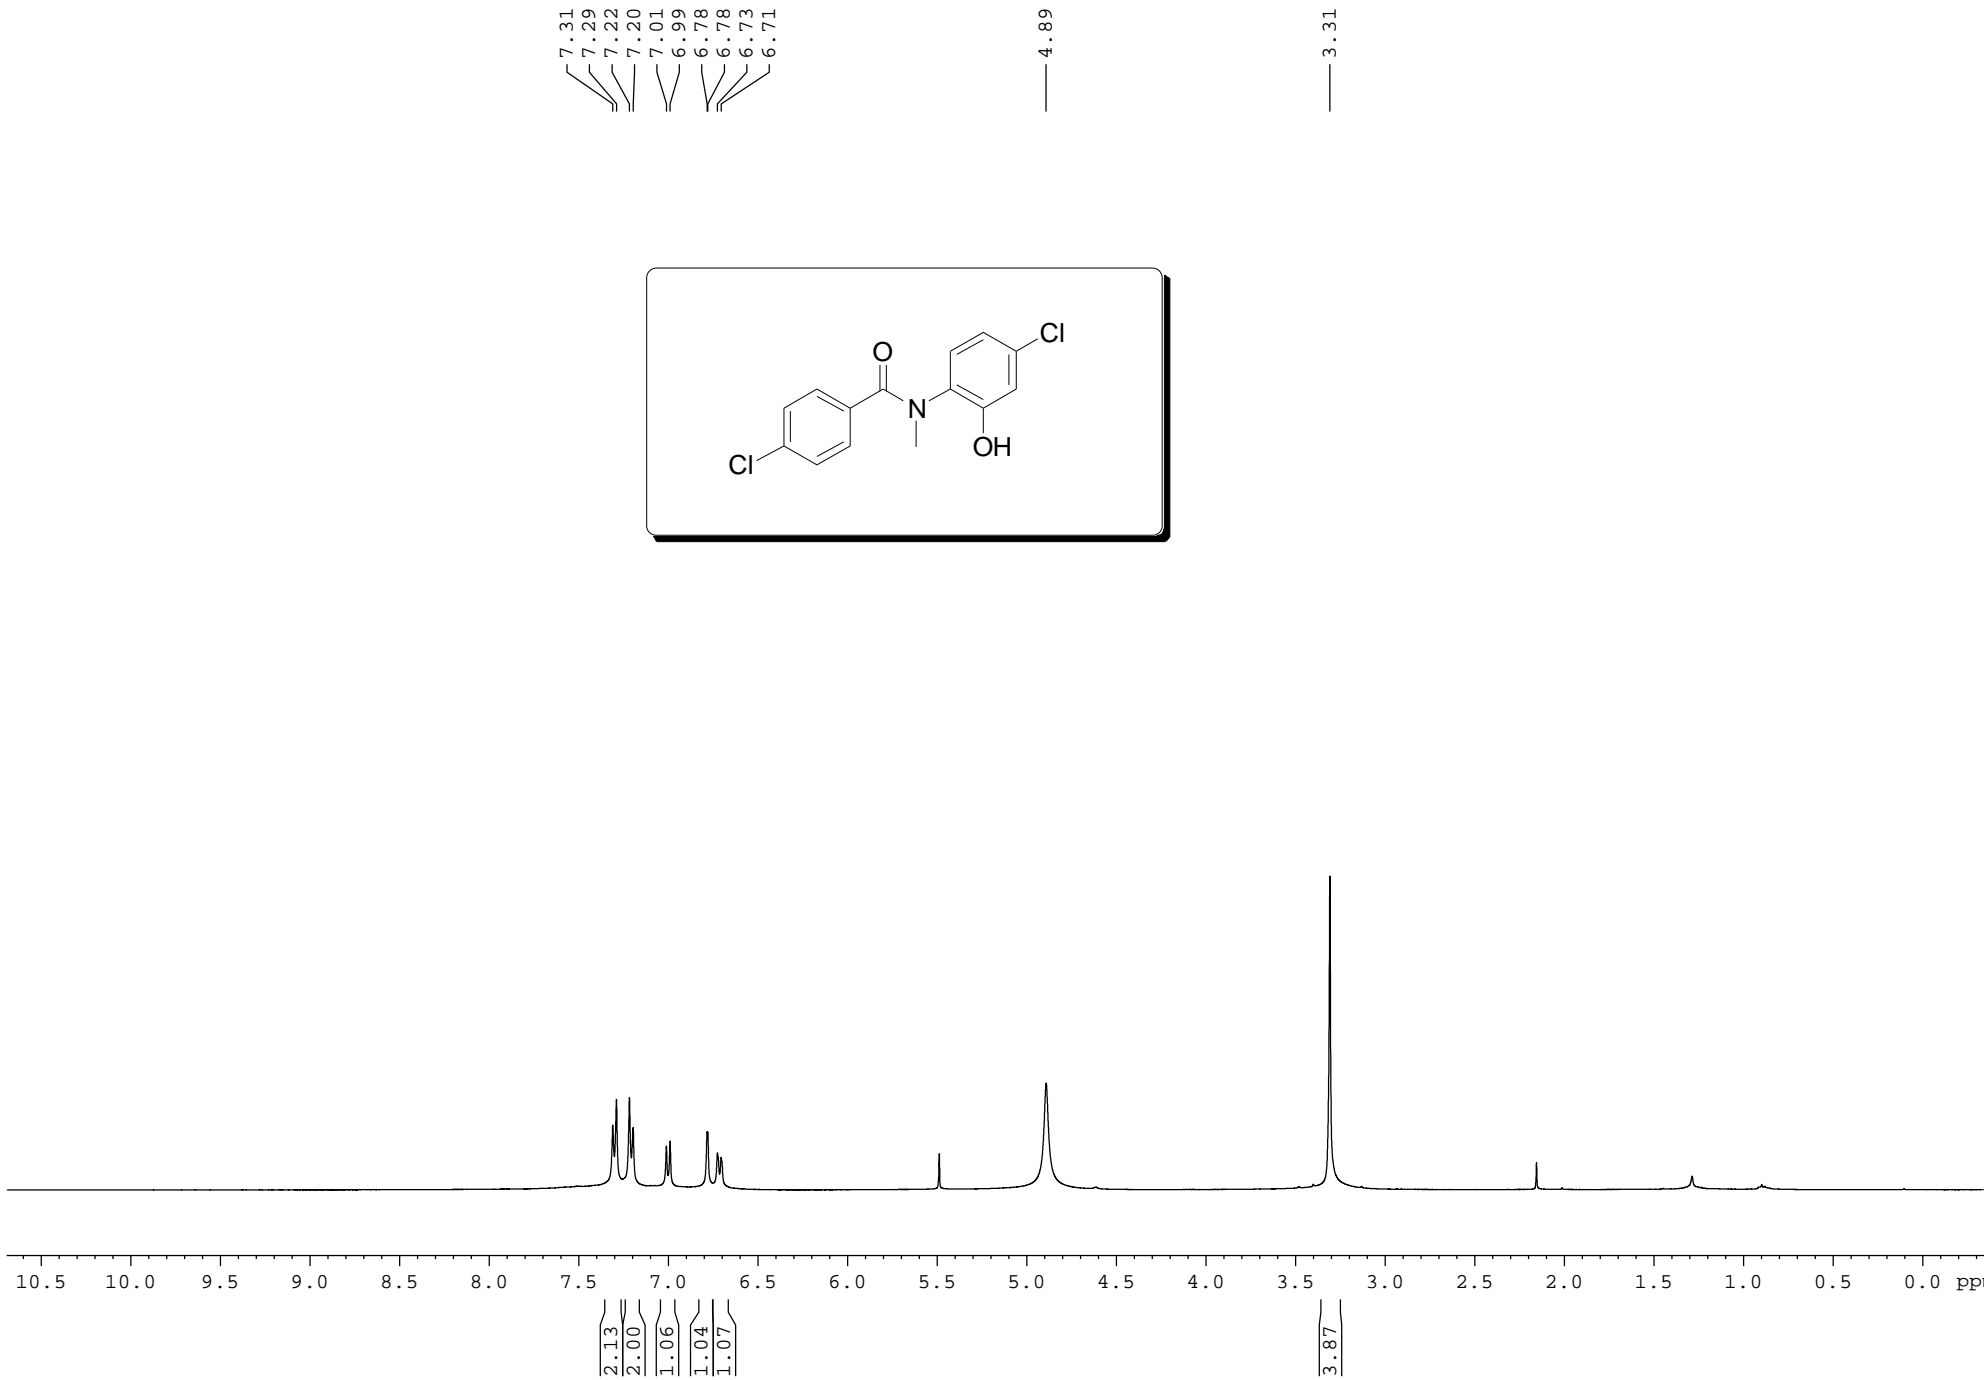

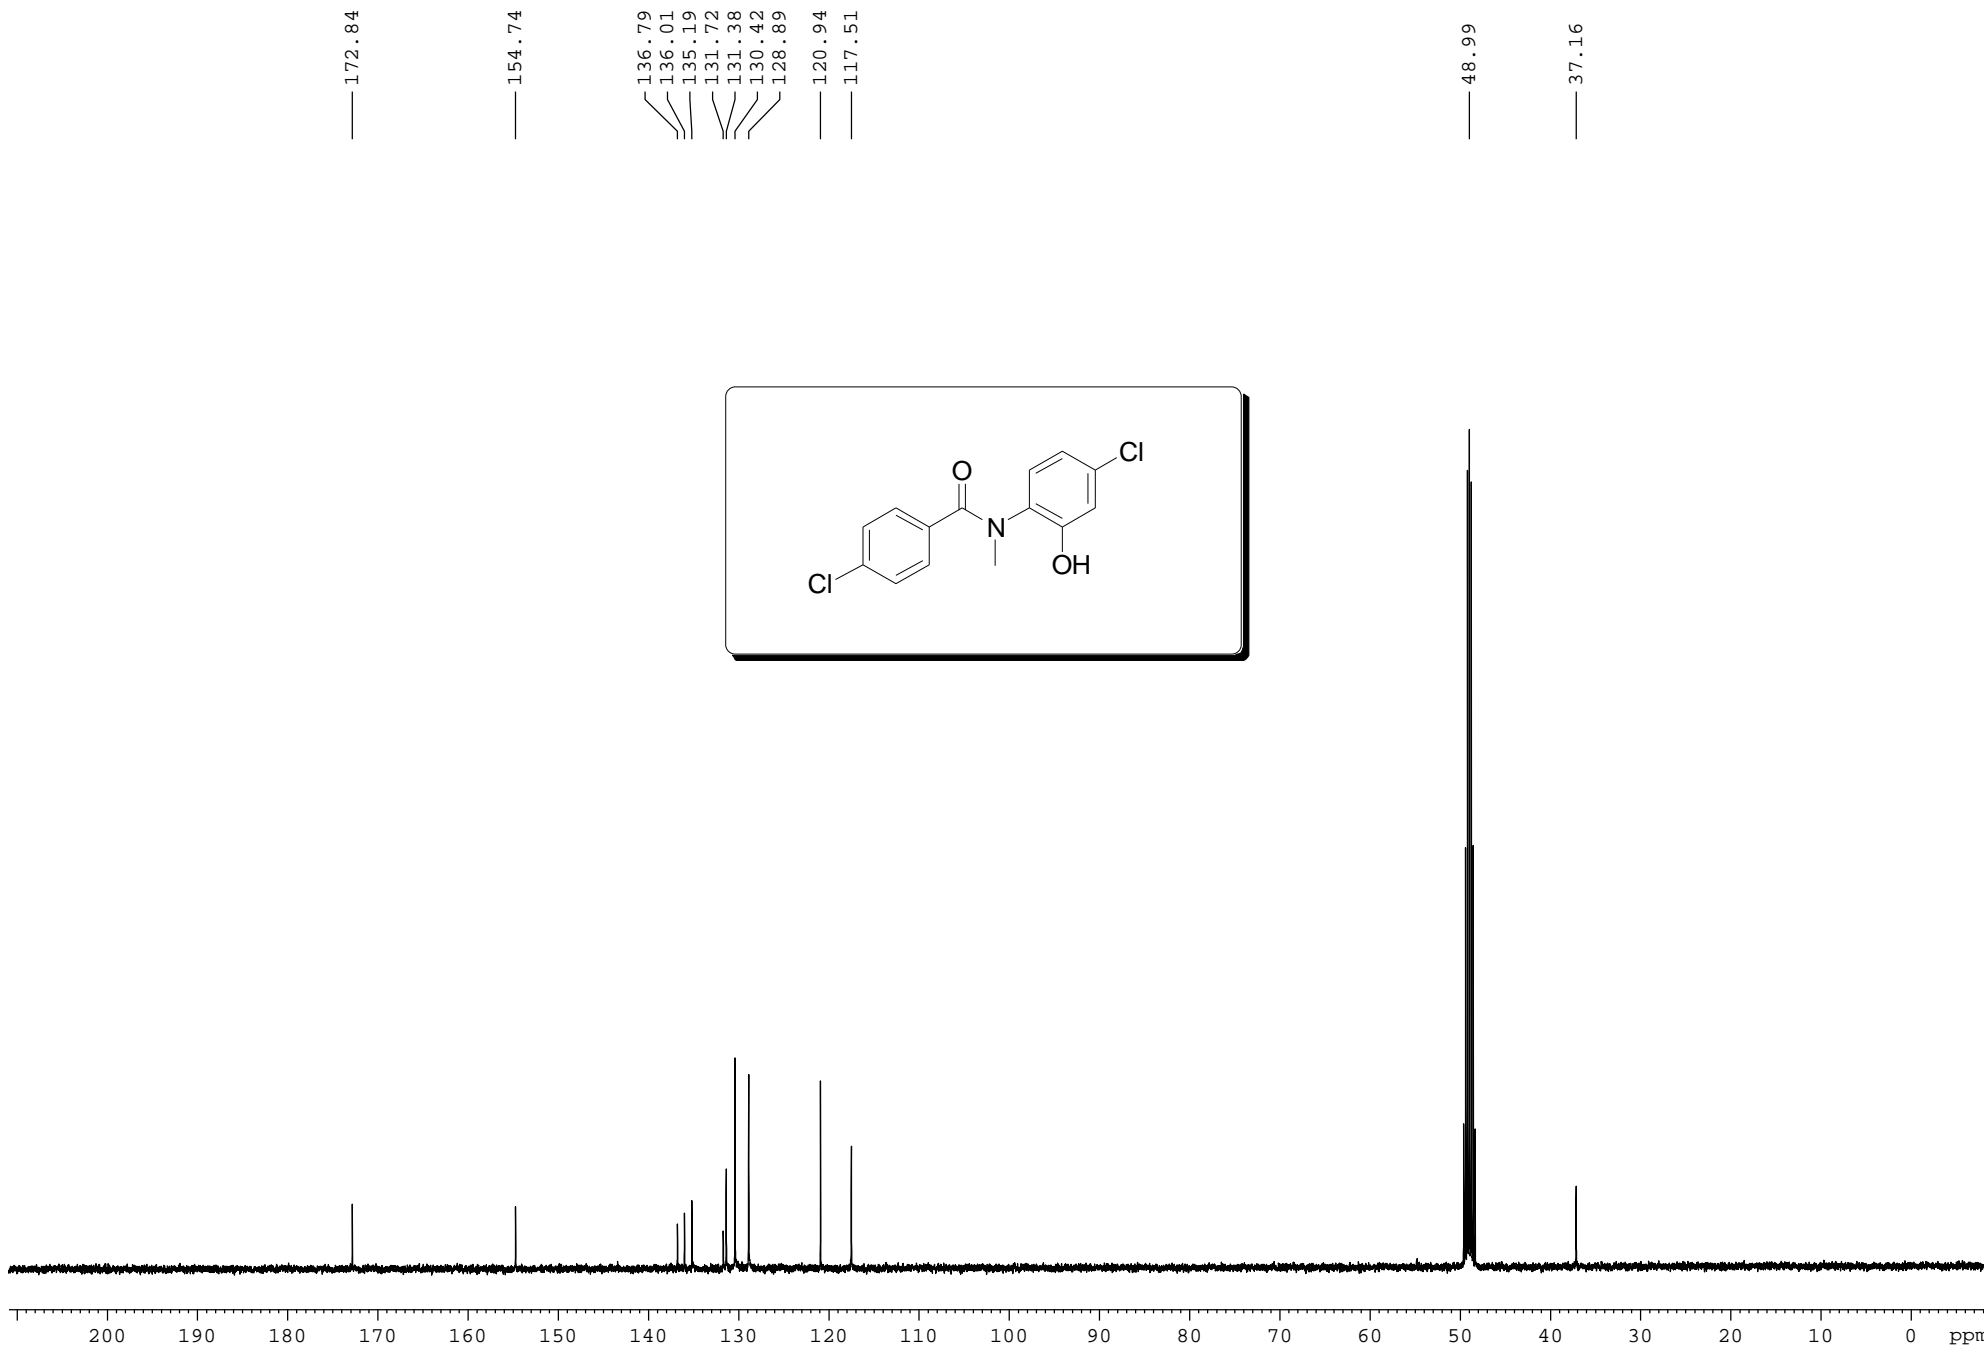

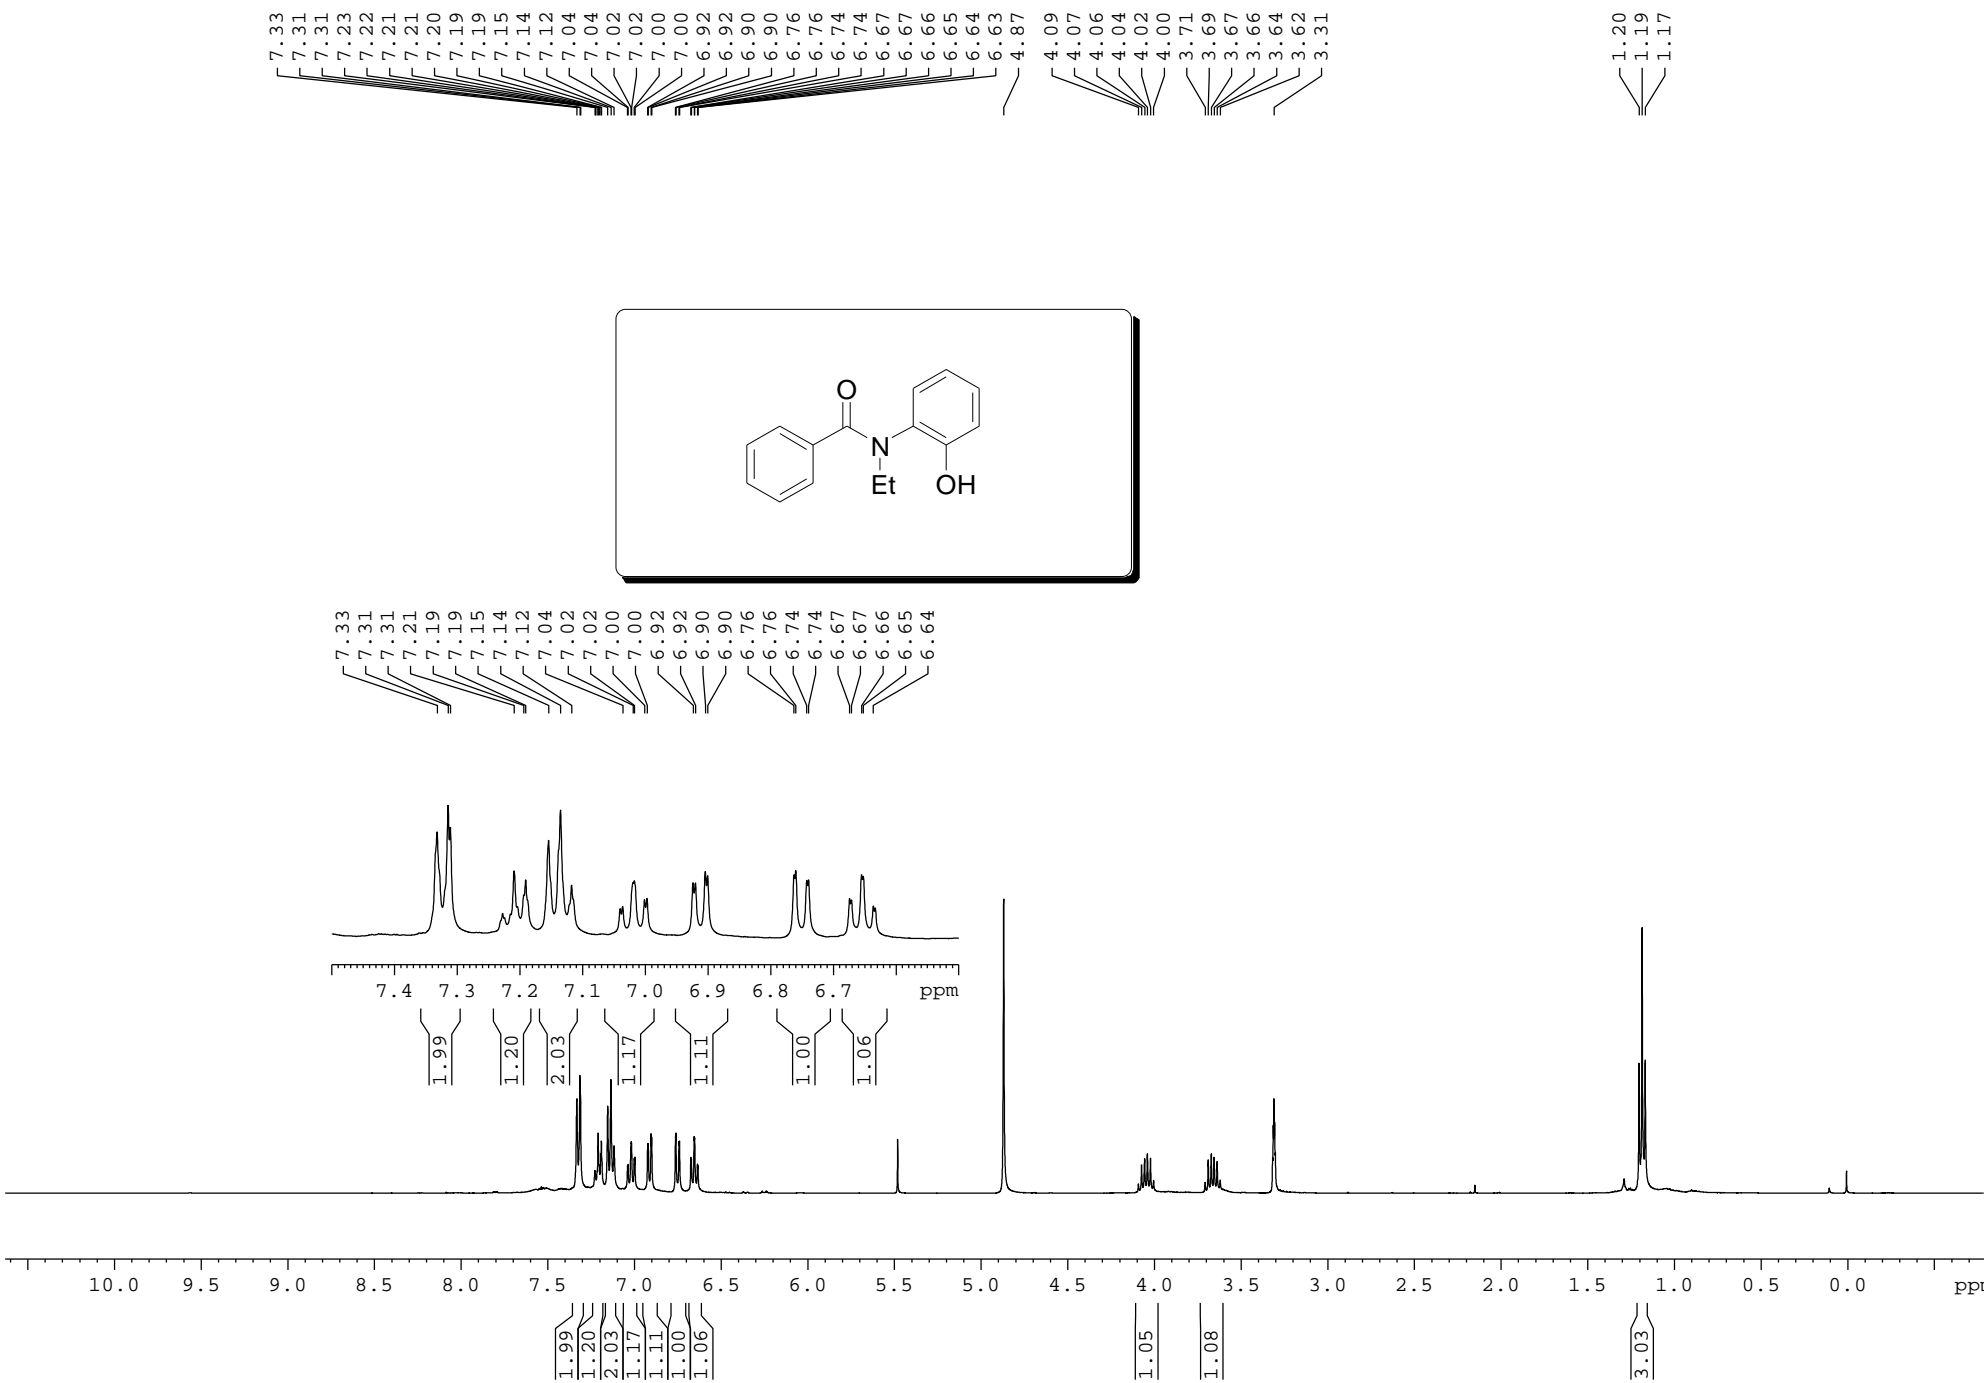

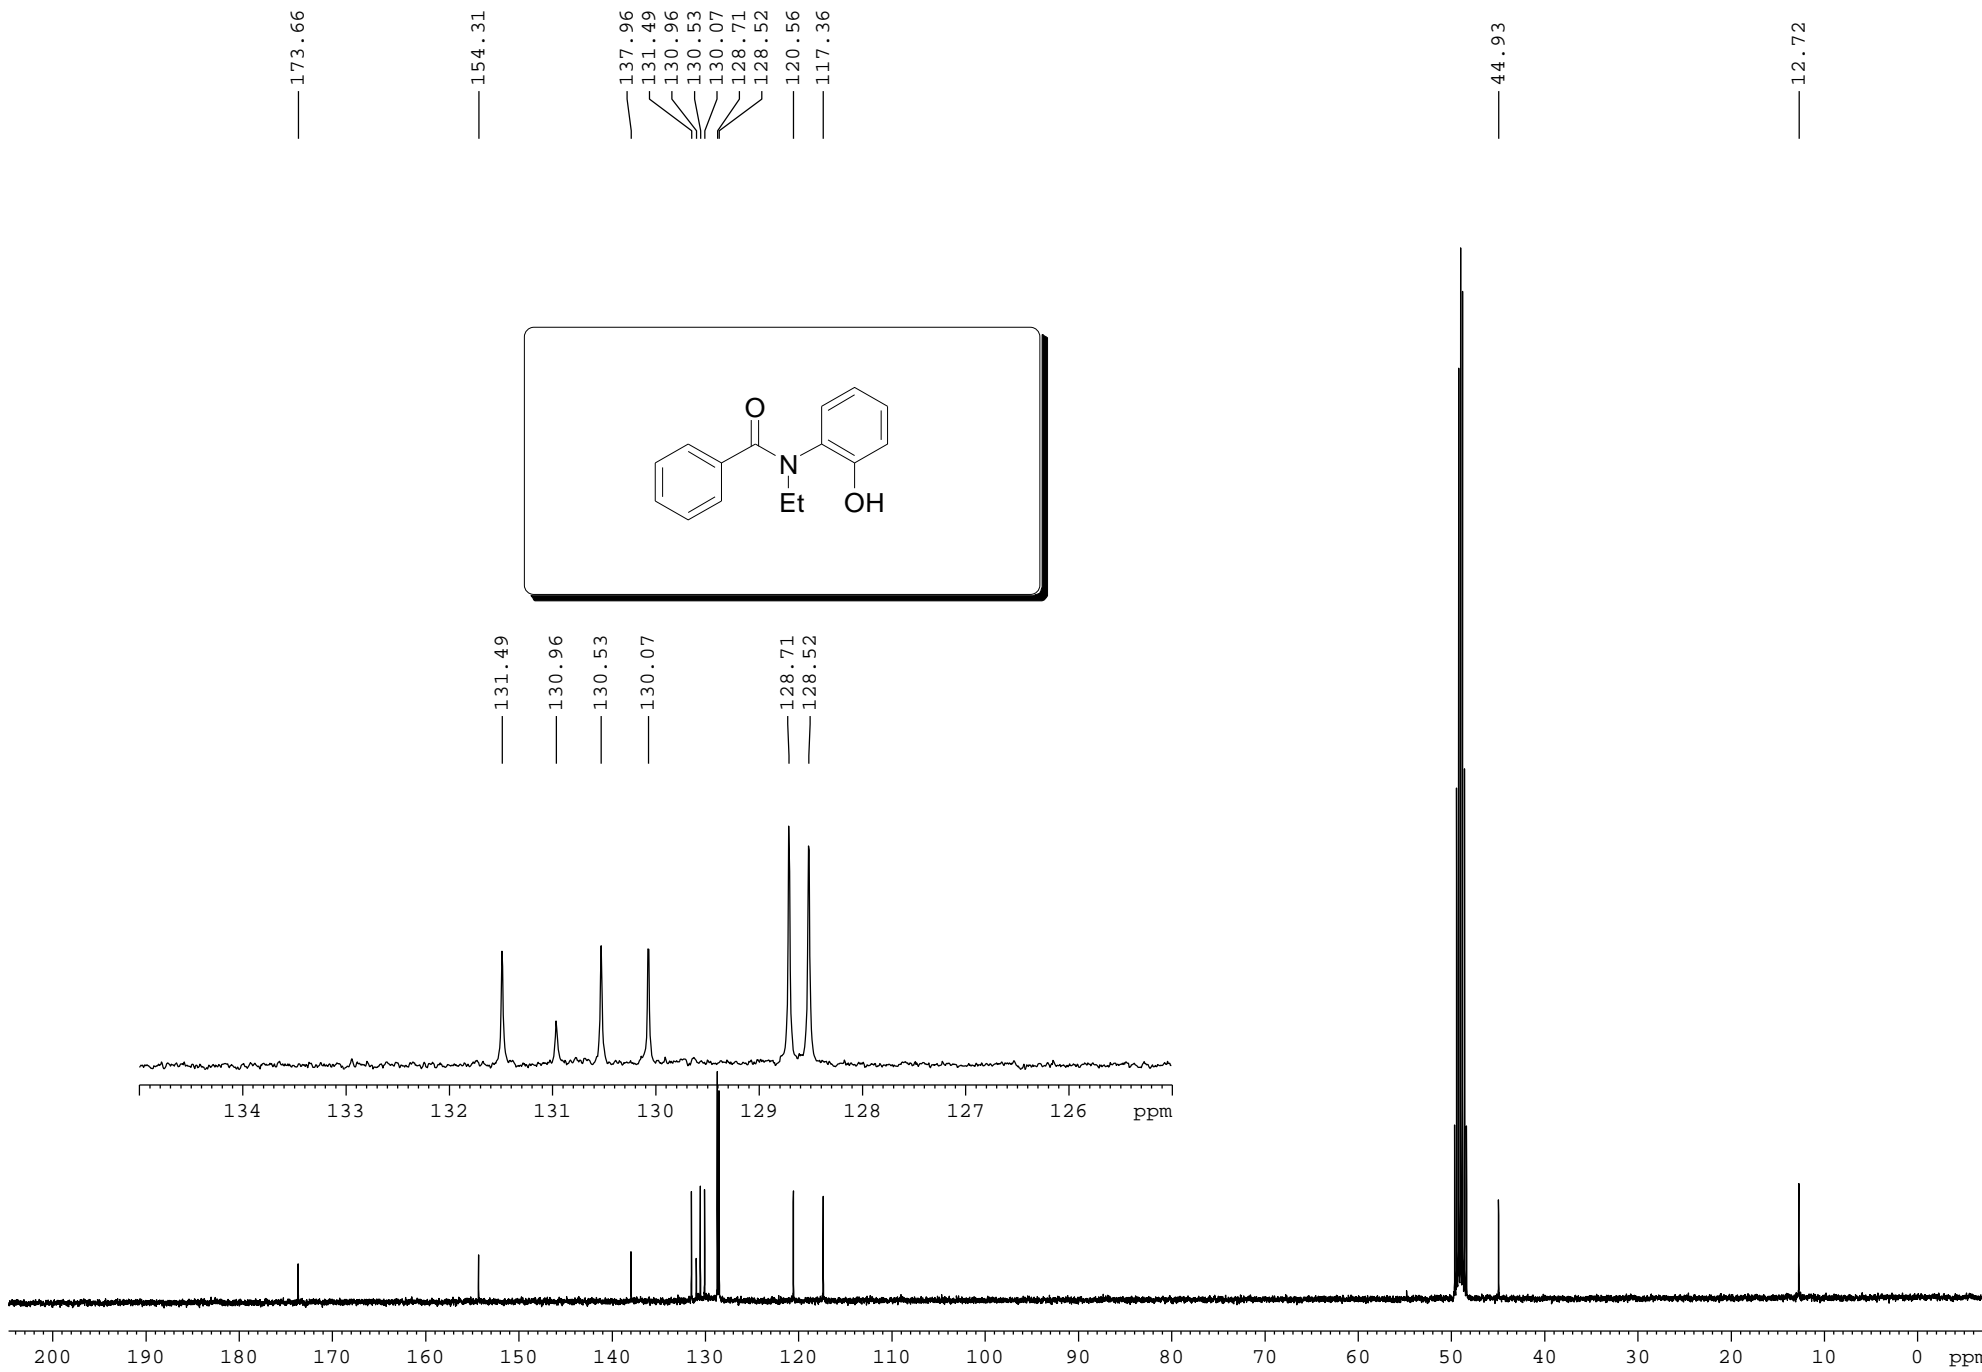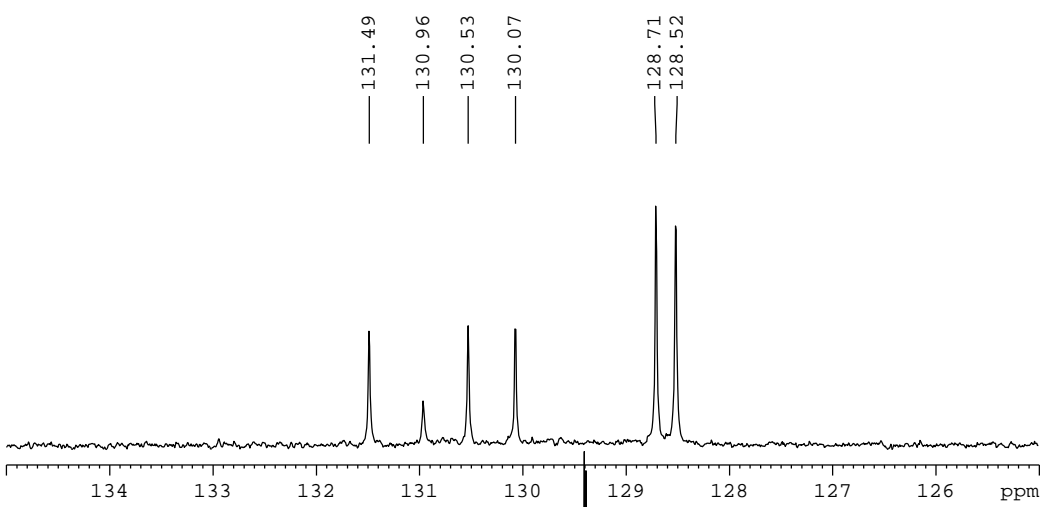



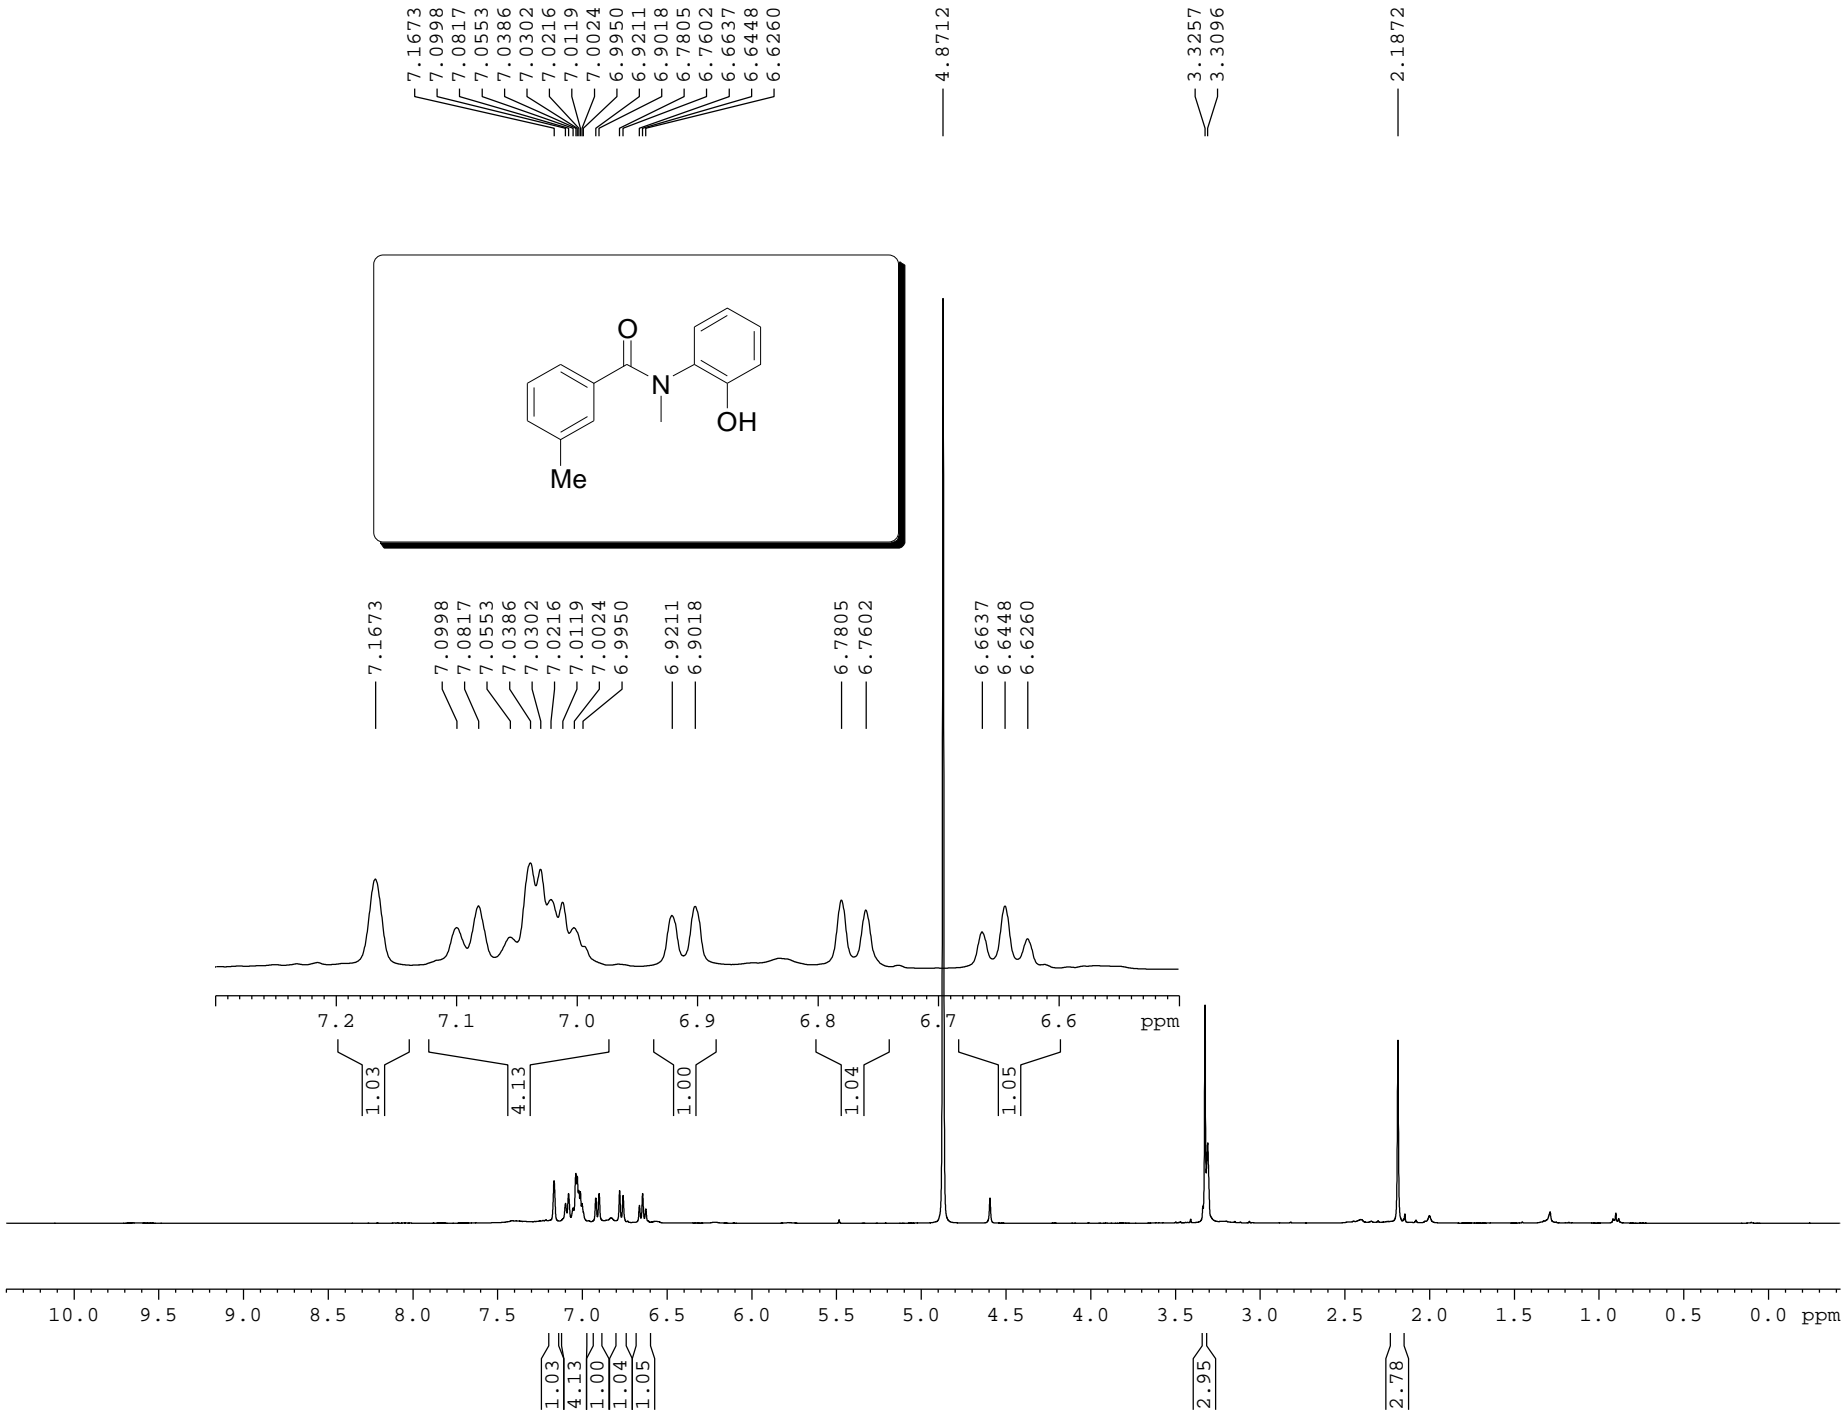

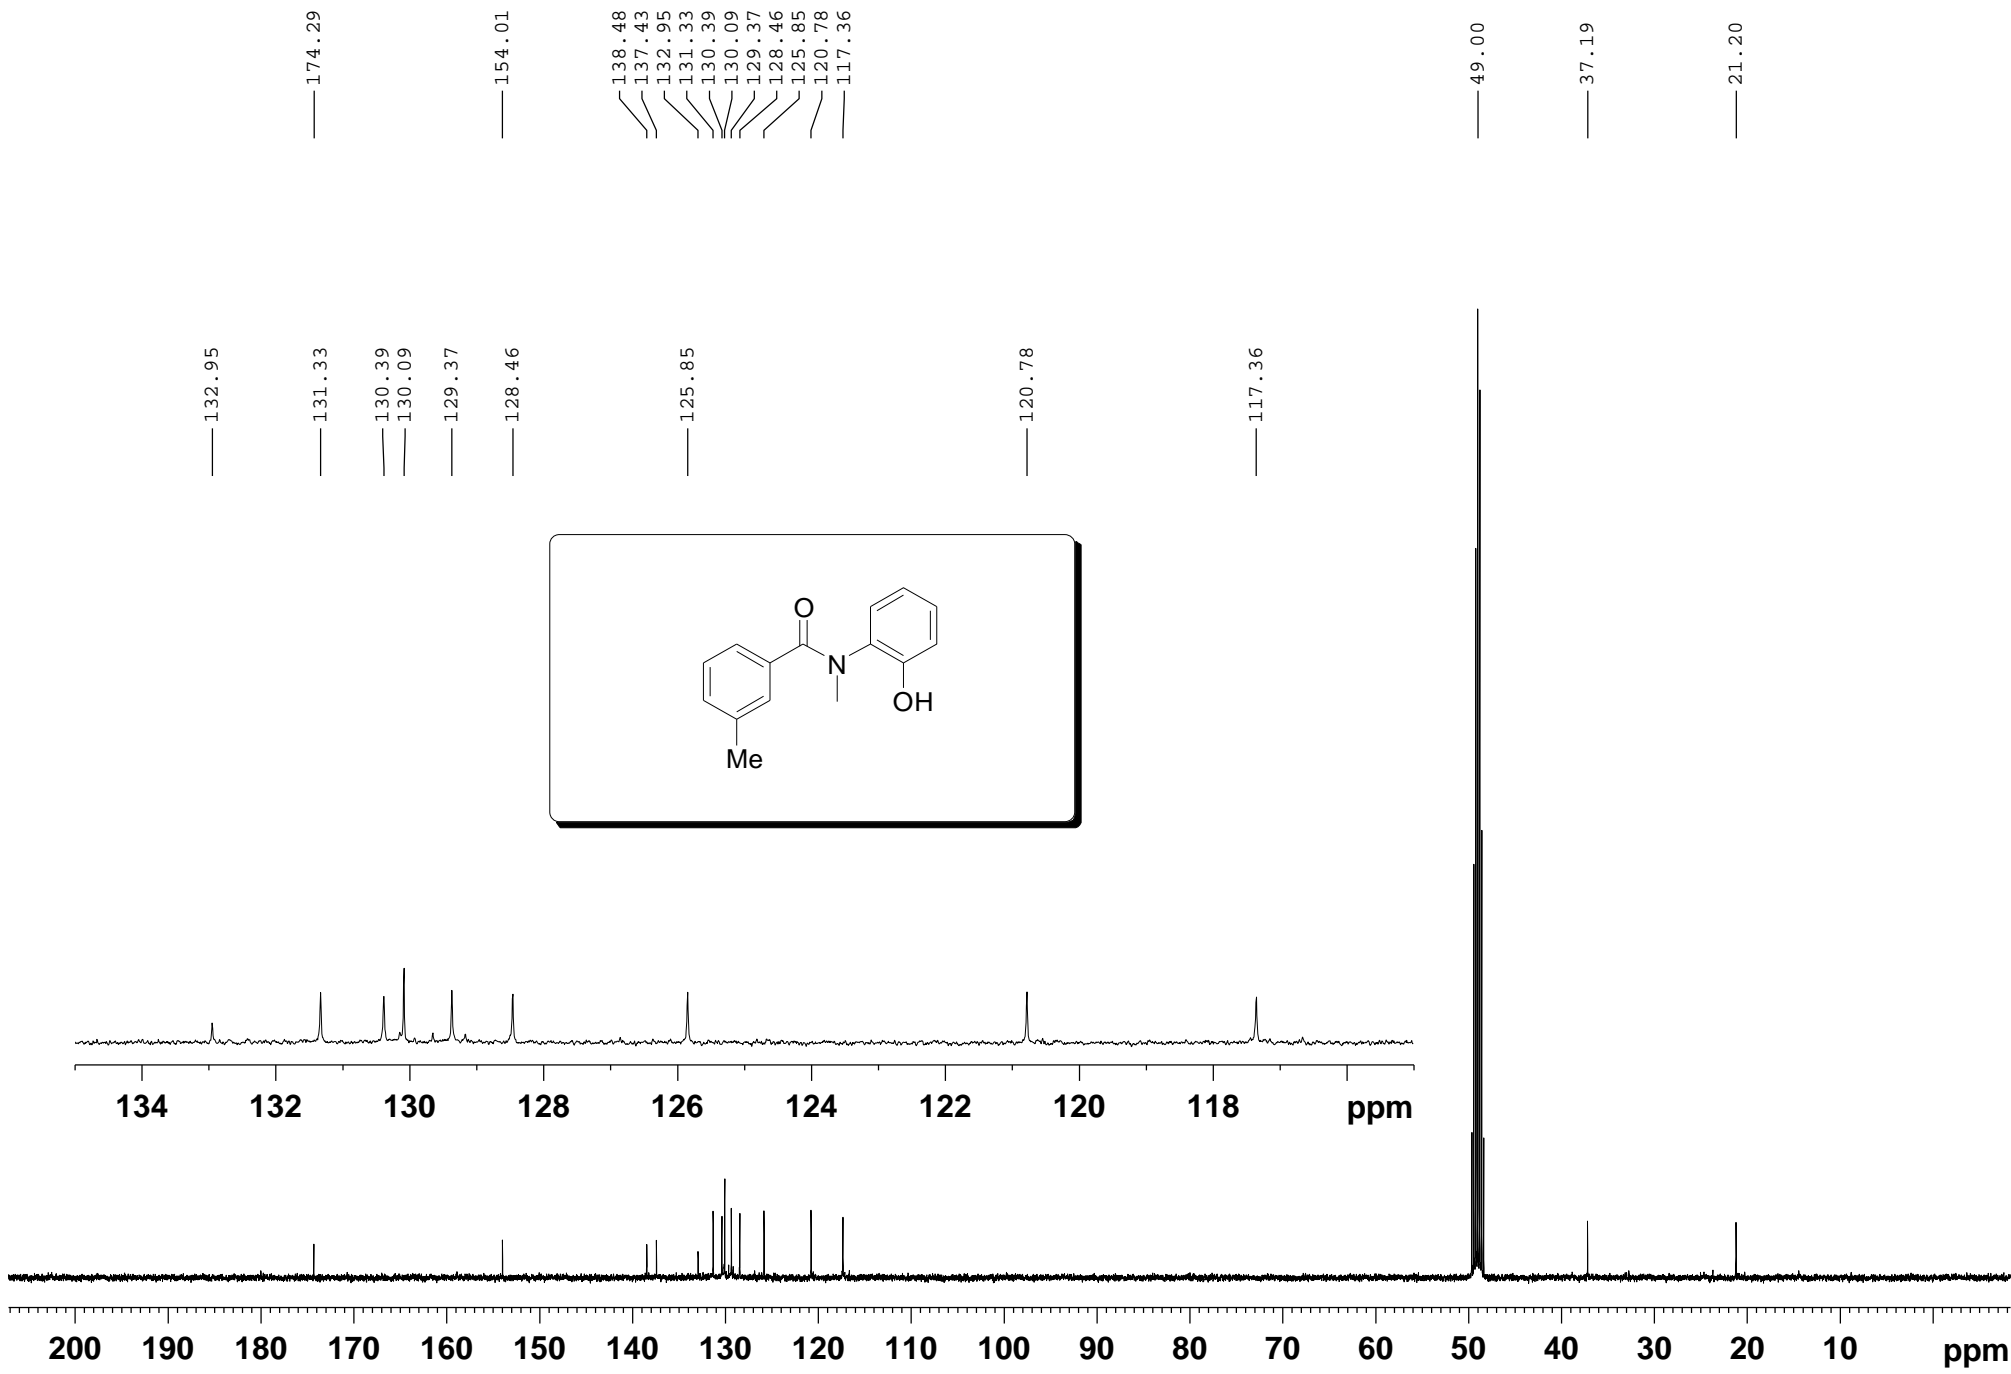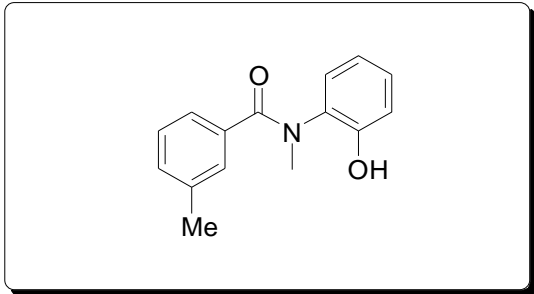

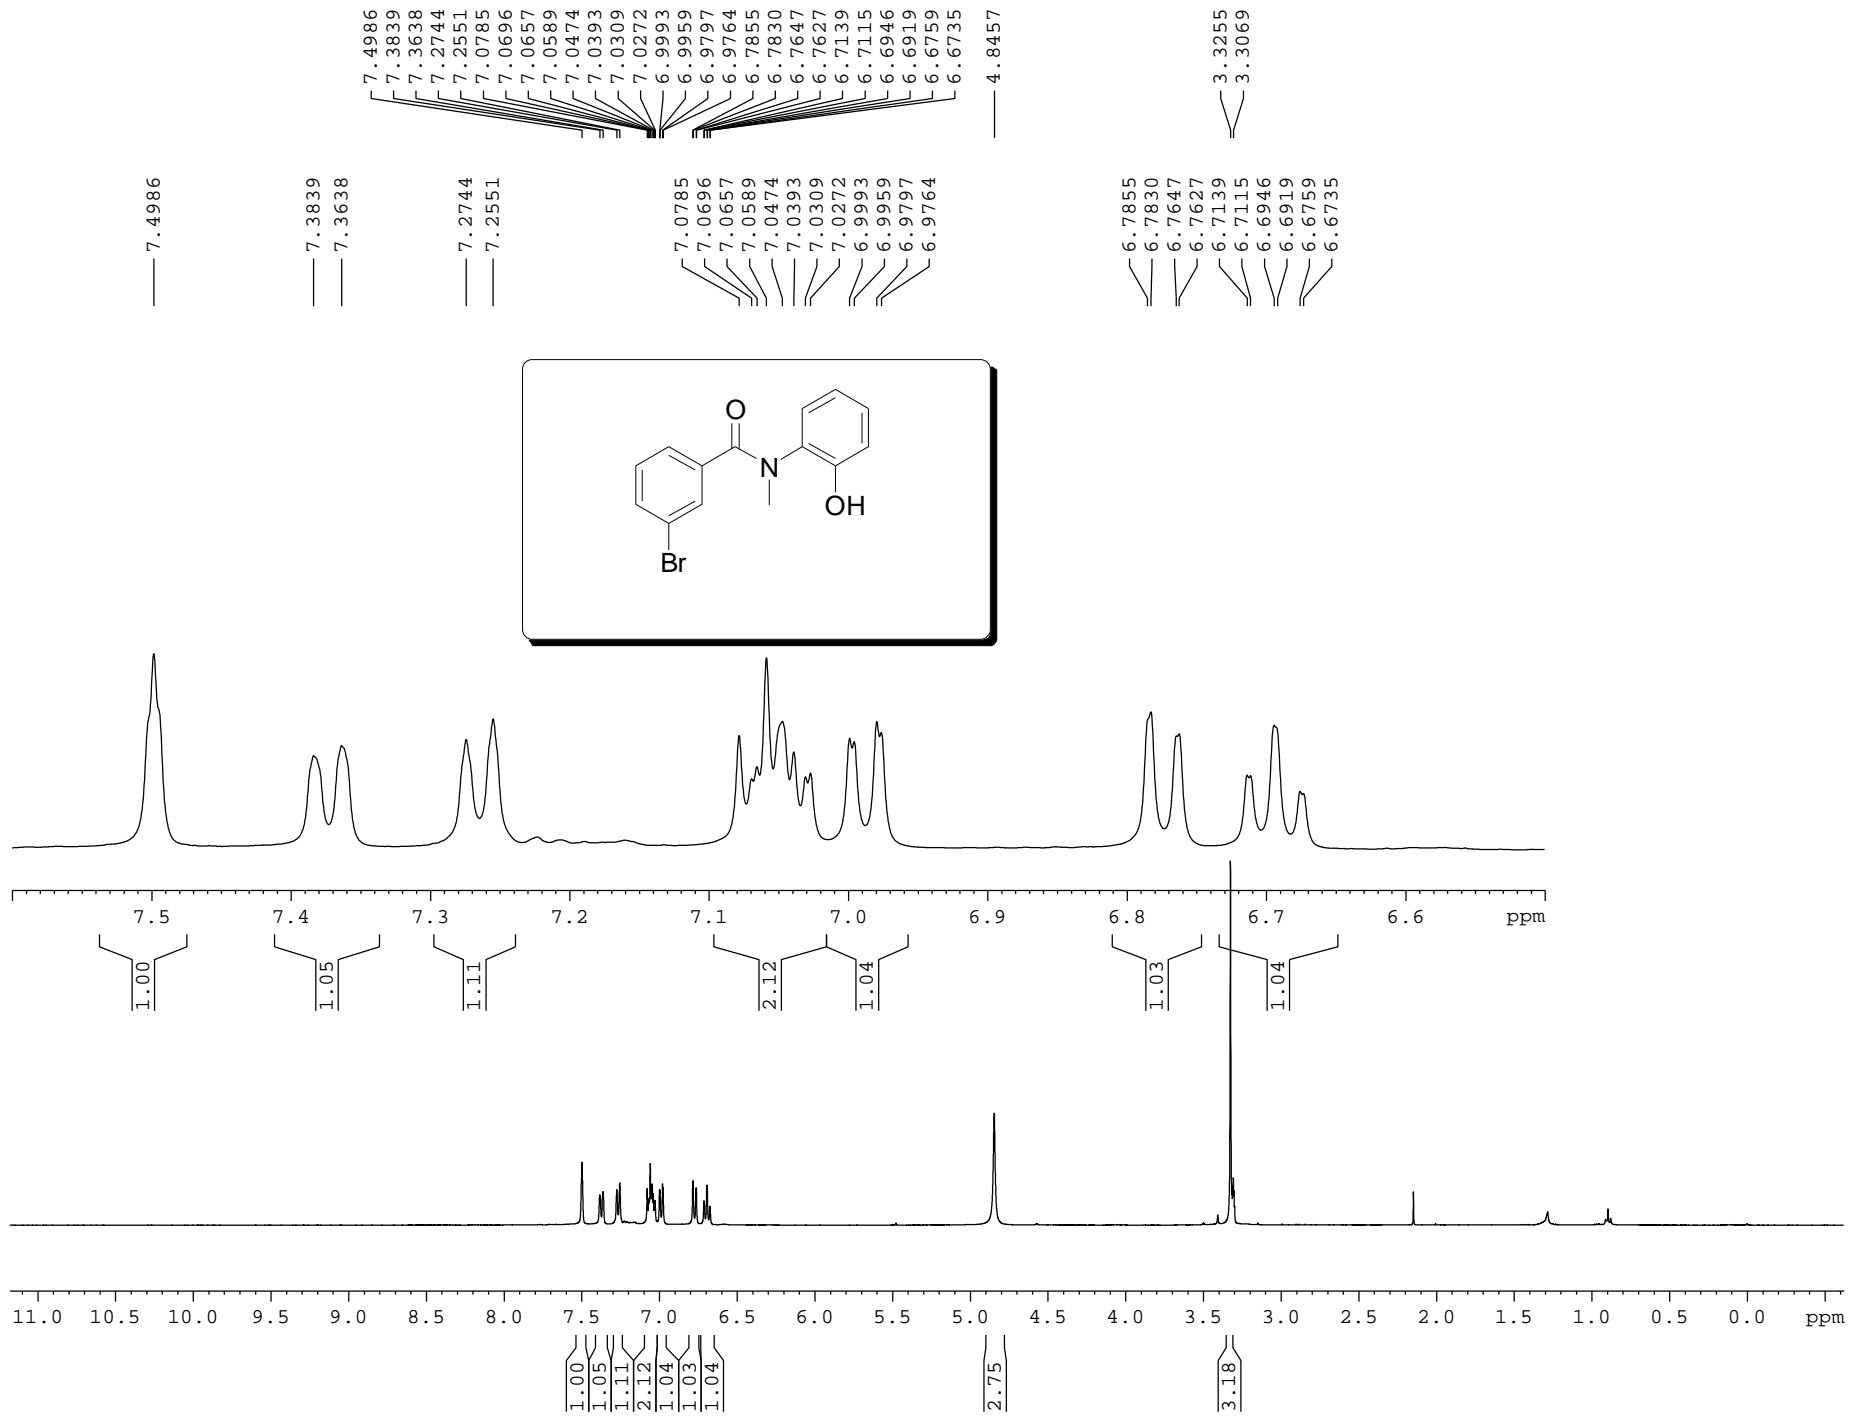

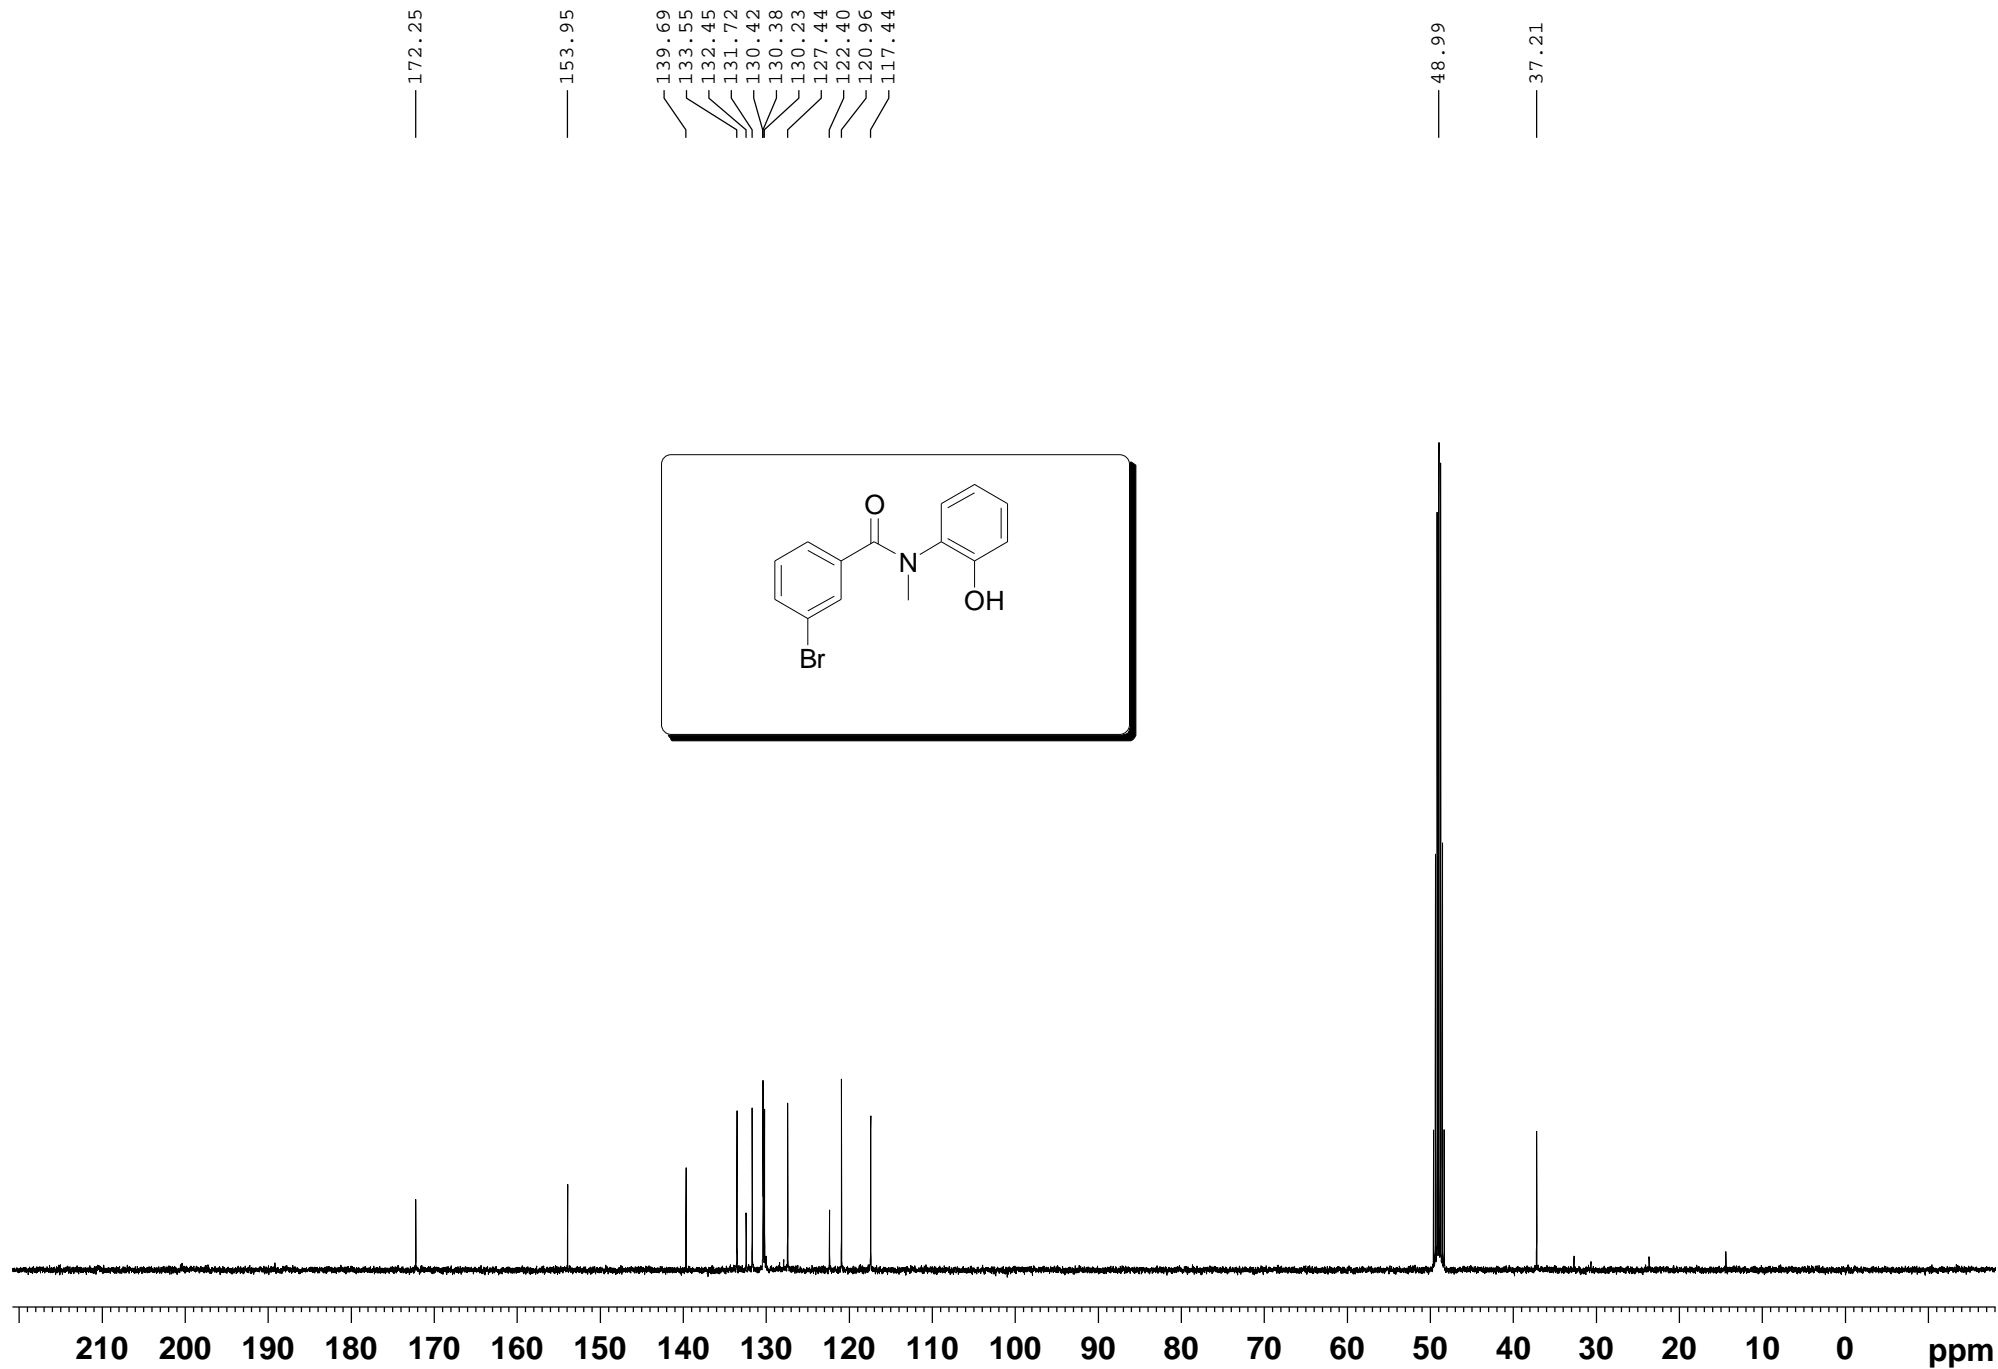

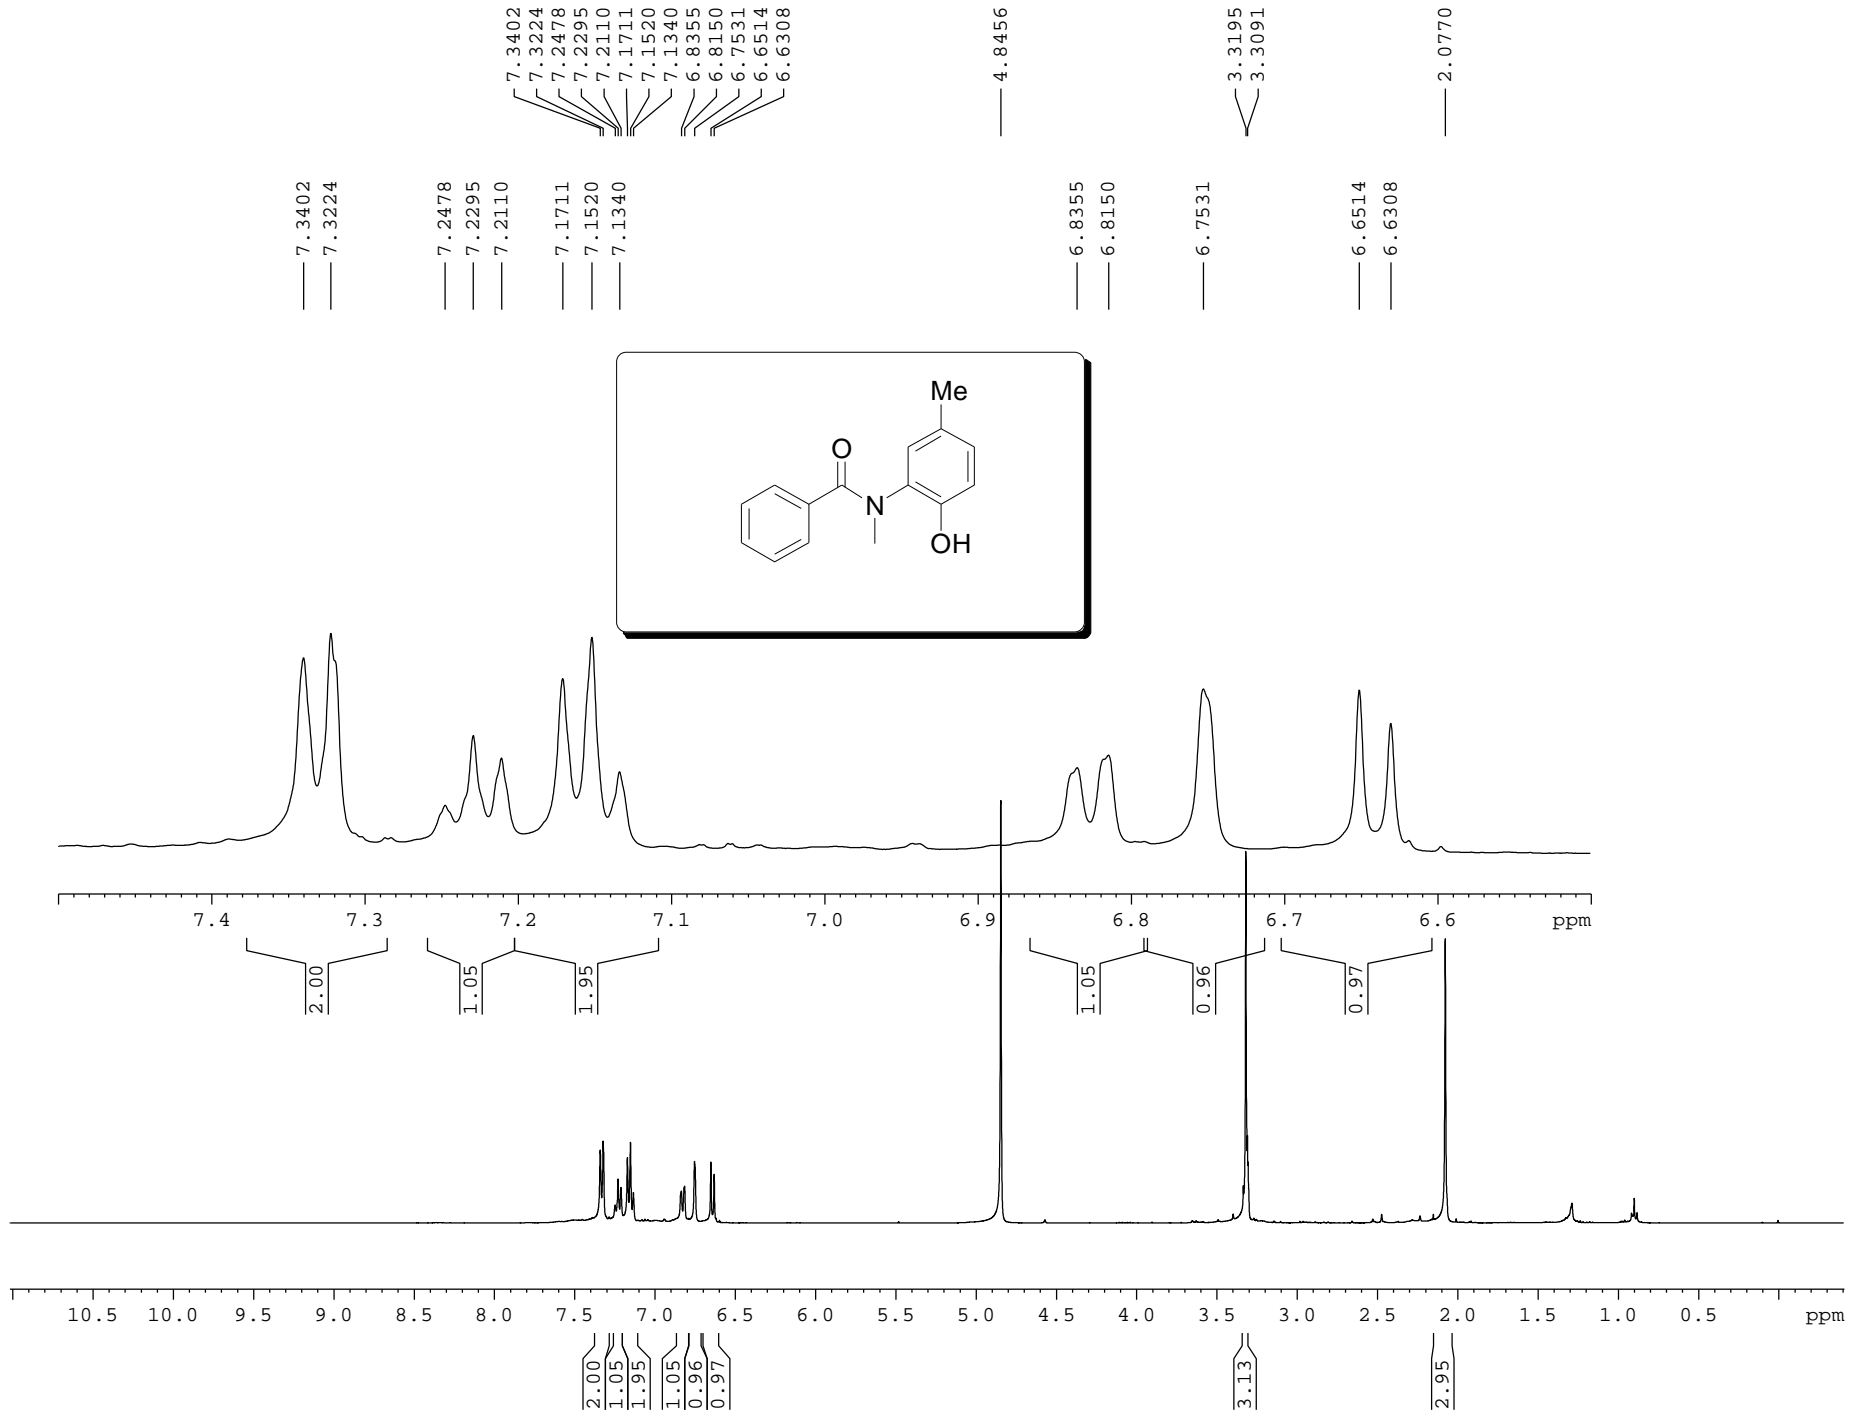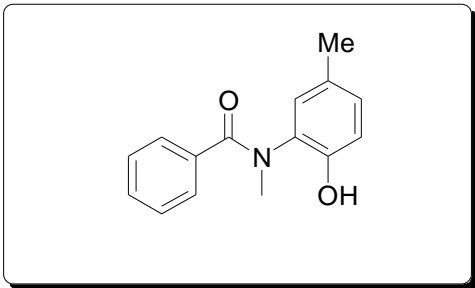

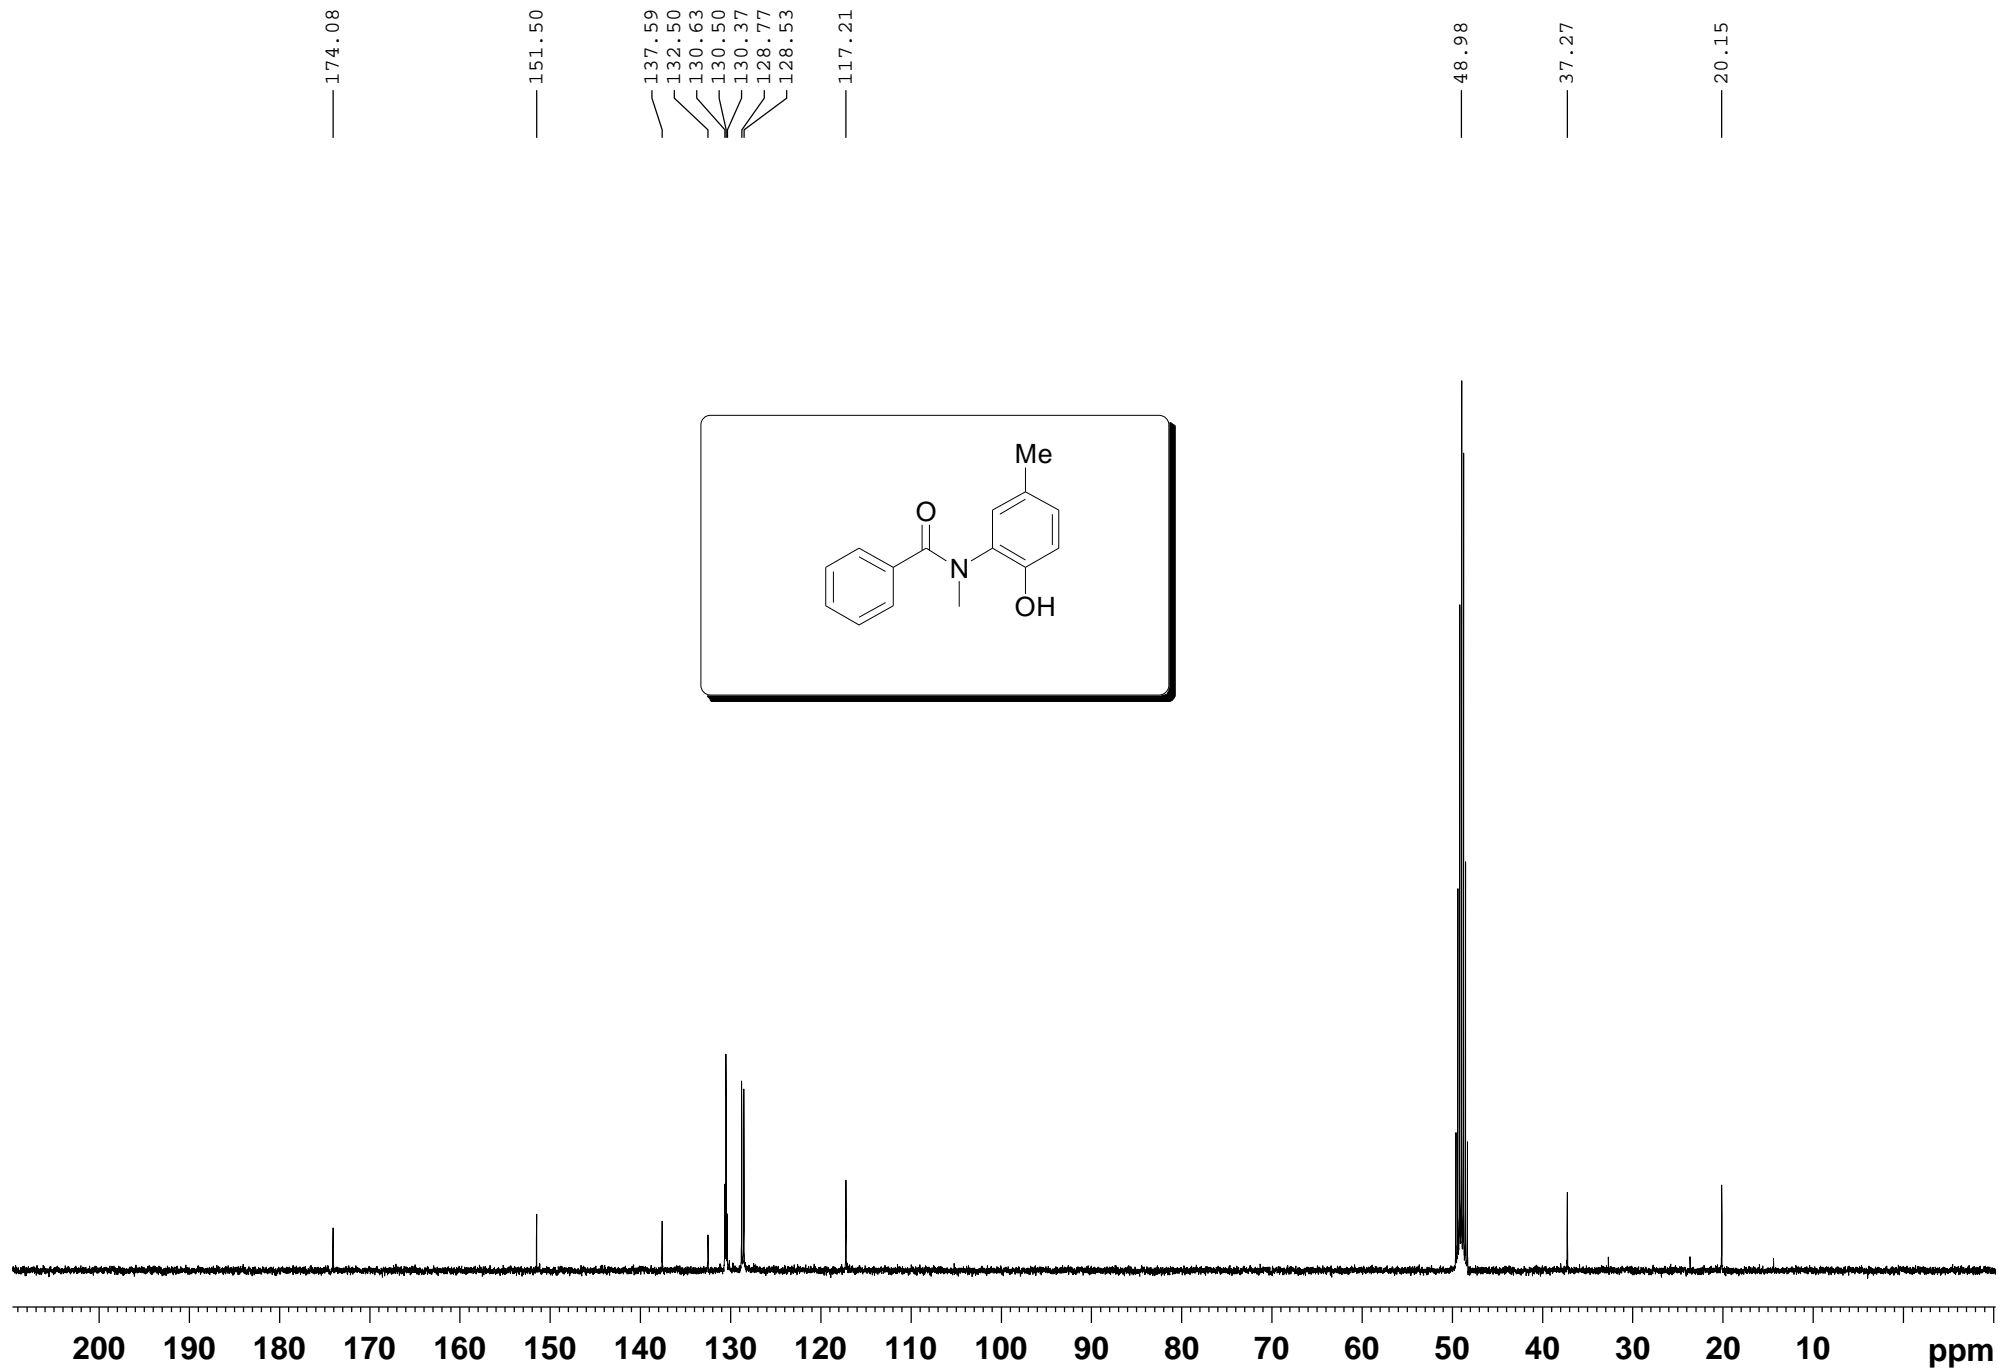

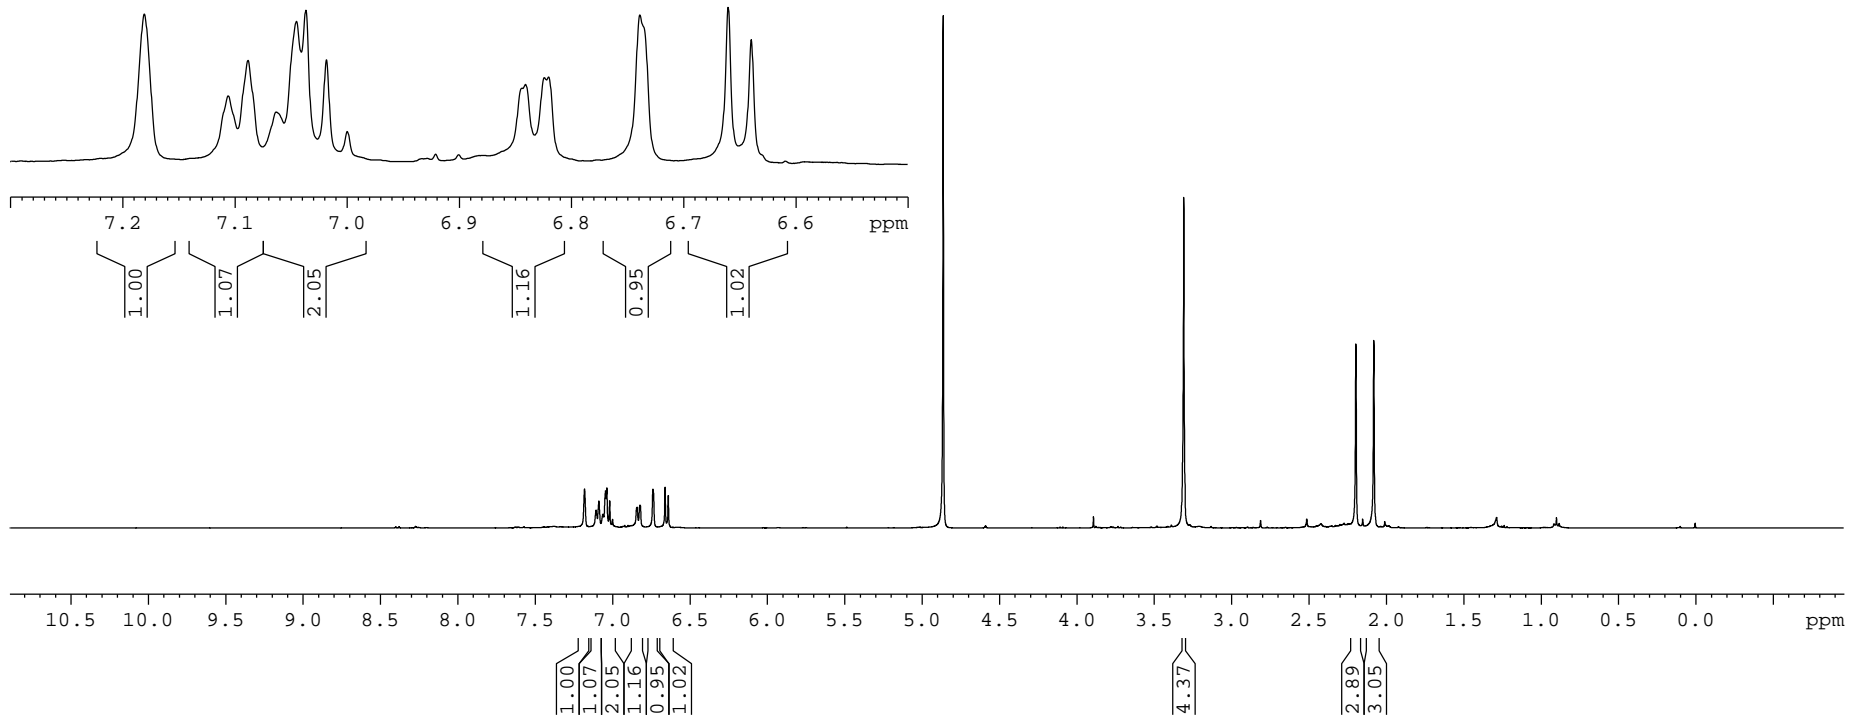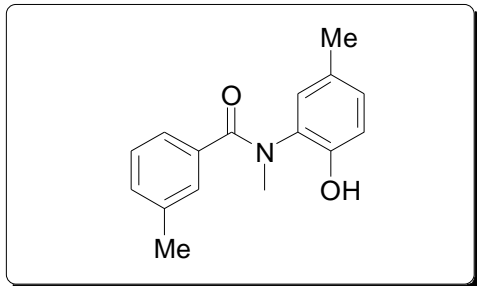

7.1808  
 7.1060  
 7.0884  
 7.0633  
 7.0453  
 7.0368  
 7.0185  
 6.9999  
 6.8442  
 6.8410  
 6.8242  
 6.8204  
 6.7391  
 6.7347  
 6.6603  
 6.6397  
 3.3088  
 2.1965  
 2.0806

7.1808  
 7.1060  
 7.0884  
 7.0633  
 7.0453  
 7.0368  
 7.0185  
 6.9999  
 6.8442  
 6.8410  
 6.8242  
 6.8204  
 6.7391  
 6.7347  
 6.6603  
 6.6397

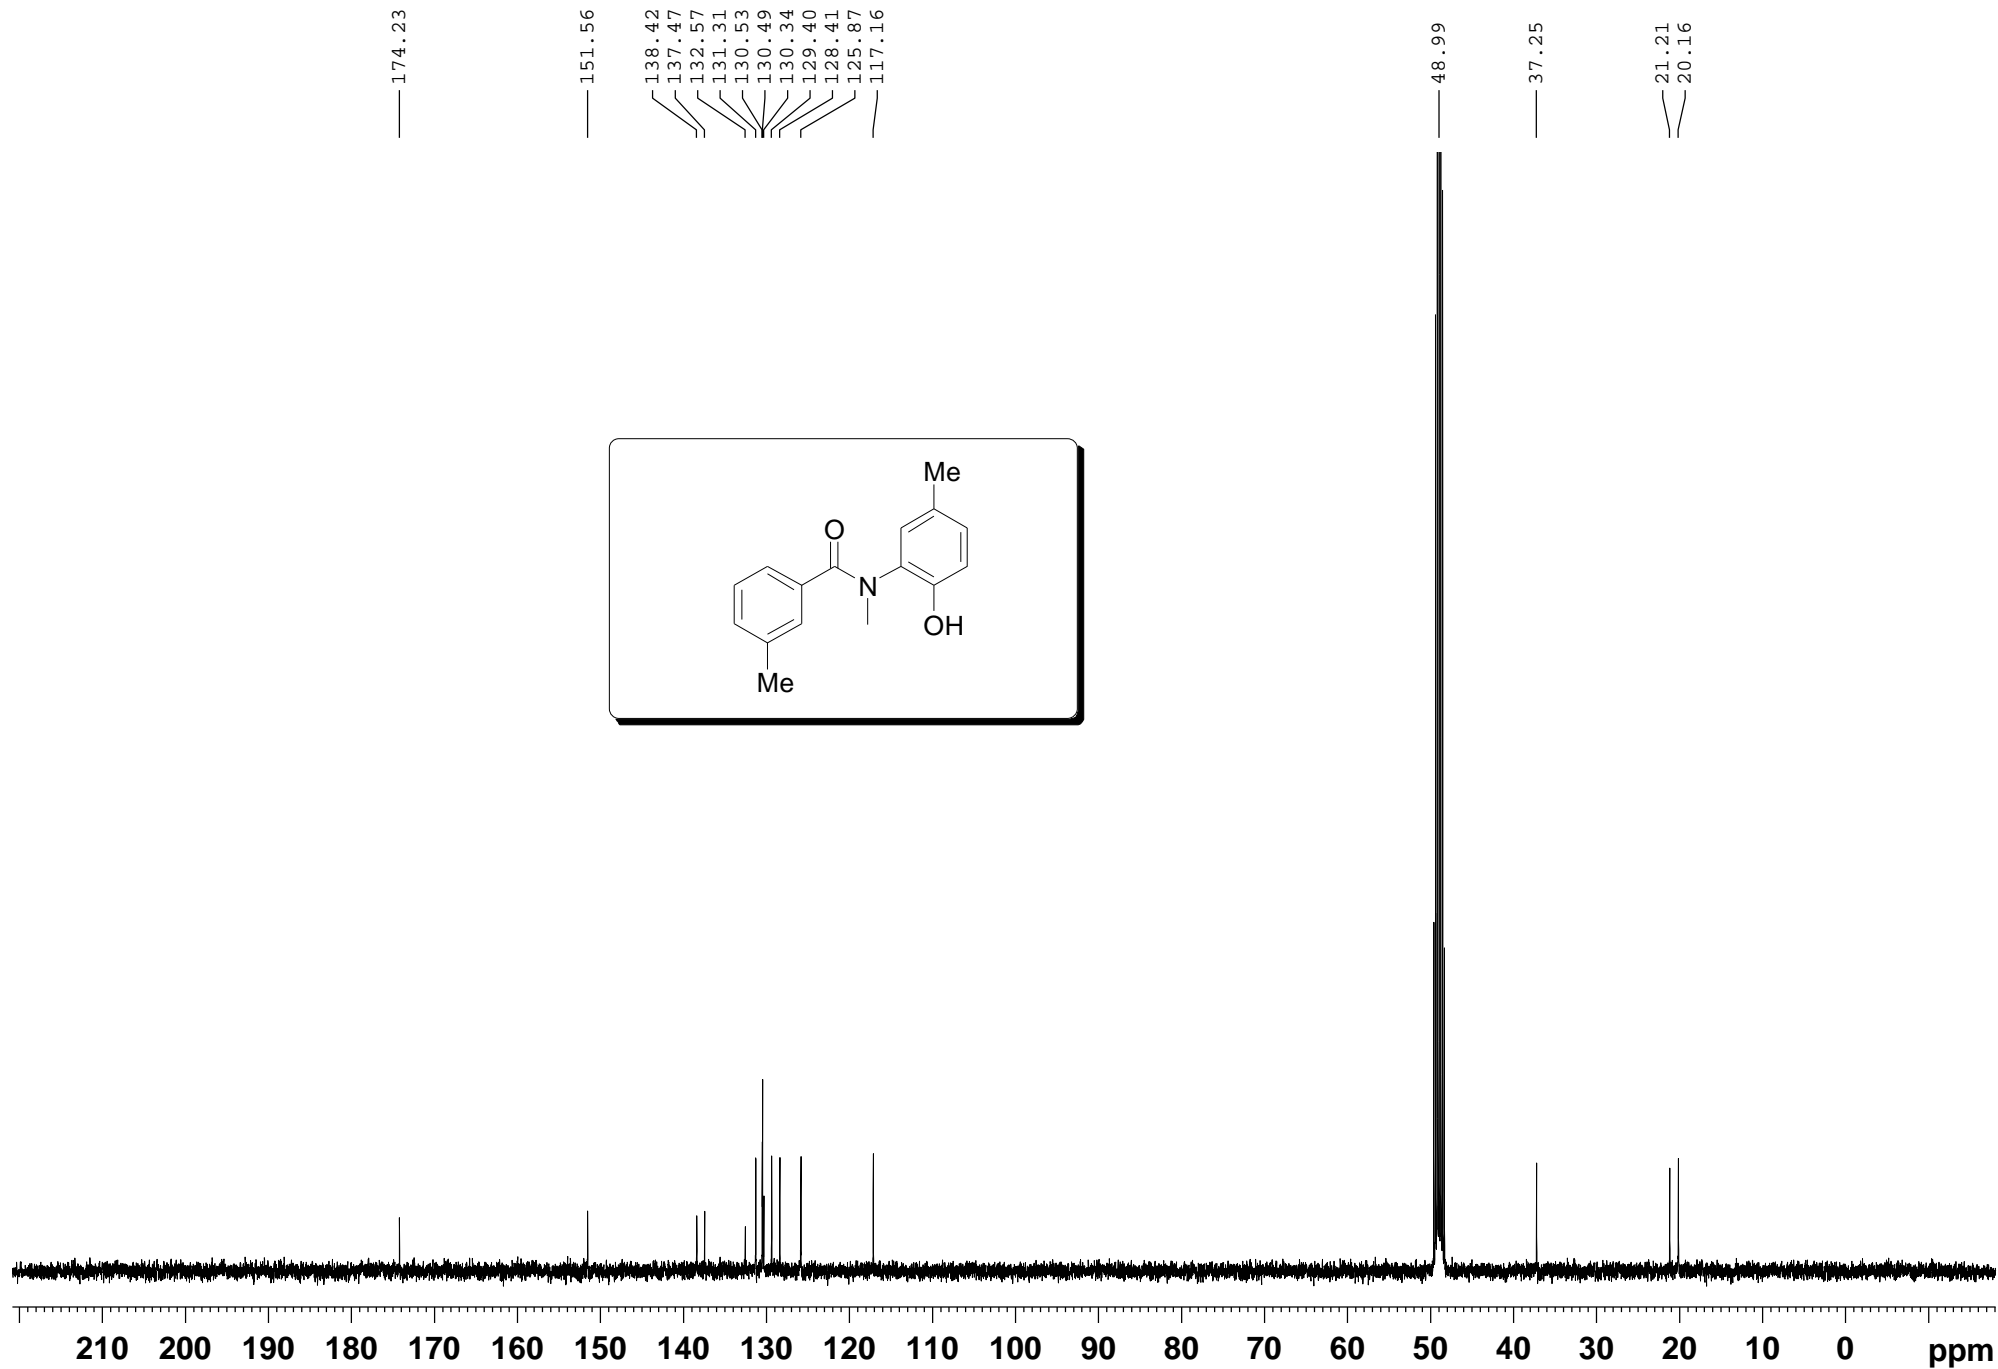



7.5233  
7.4211  
7.4014  
7.2818  
7.2623  
7.2488  
7.2446  
7.1863  
7.1817  
7.1647  
7.1597  
7.1176  
7.0980  
7.0785  
6.7056  
6.6839

— 4.8740

— 3.3065

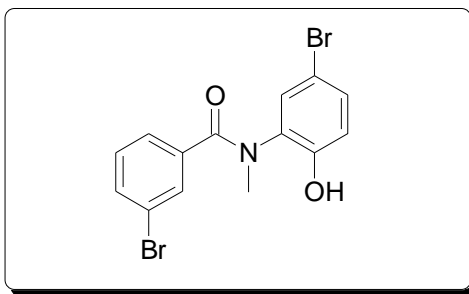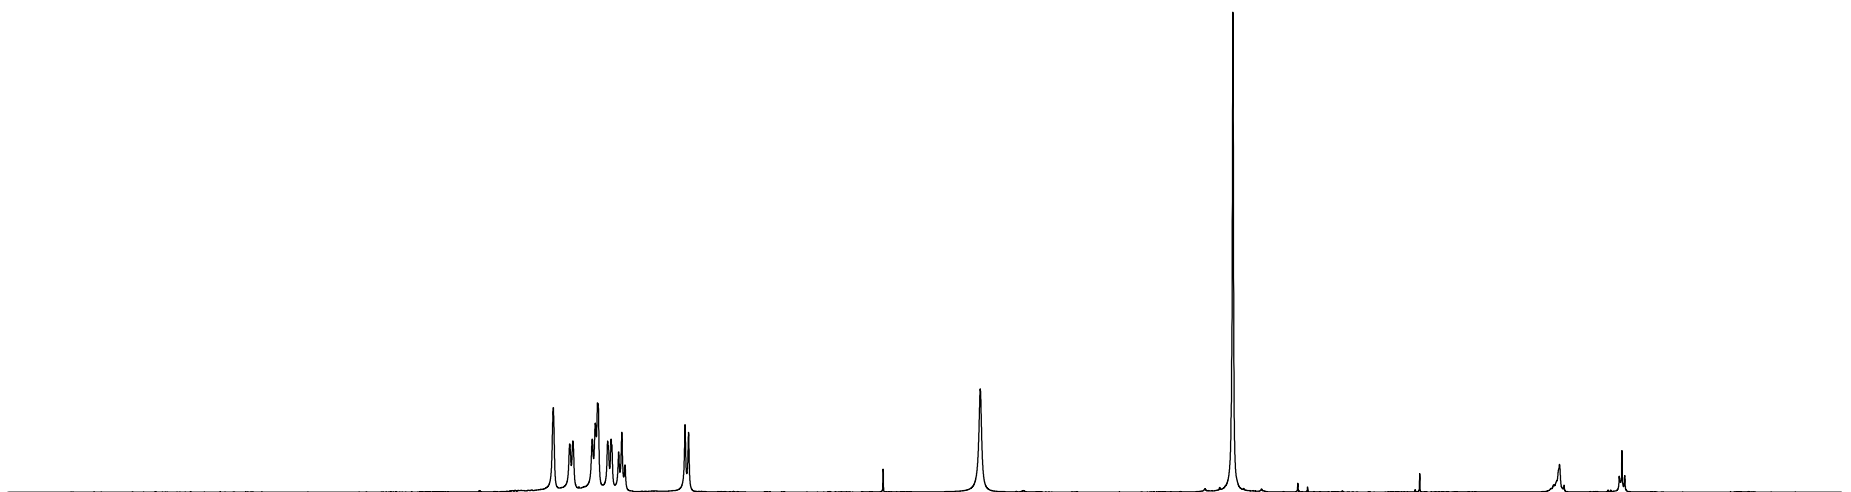

10.5 10.0 9.5 9.0 8.5 8.0 7.5 7.0 6.5 6.0 5.5 5.0 4.5 4.0 3.5 3.0 2.5 2.0 1.5 1.0 0.5 0.0 ppm

1.00  
1.10  
2.01  
1.11  
0.99  
0.97

3.52

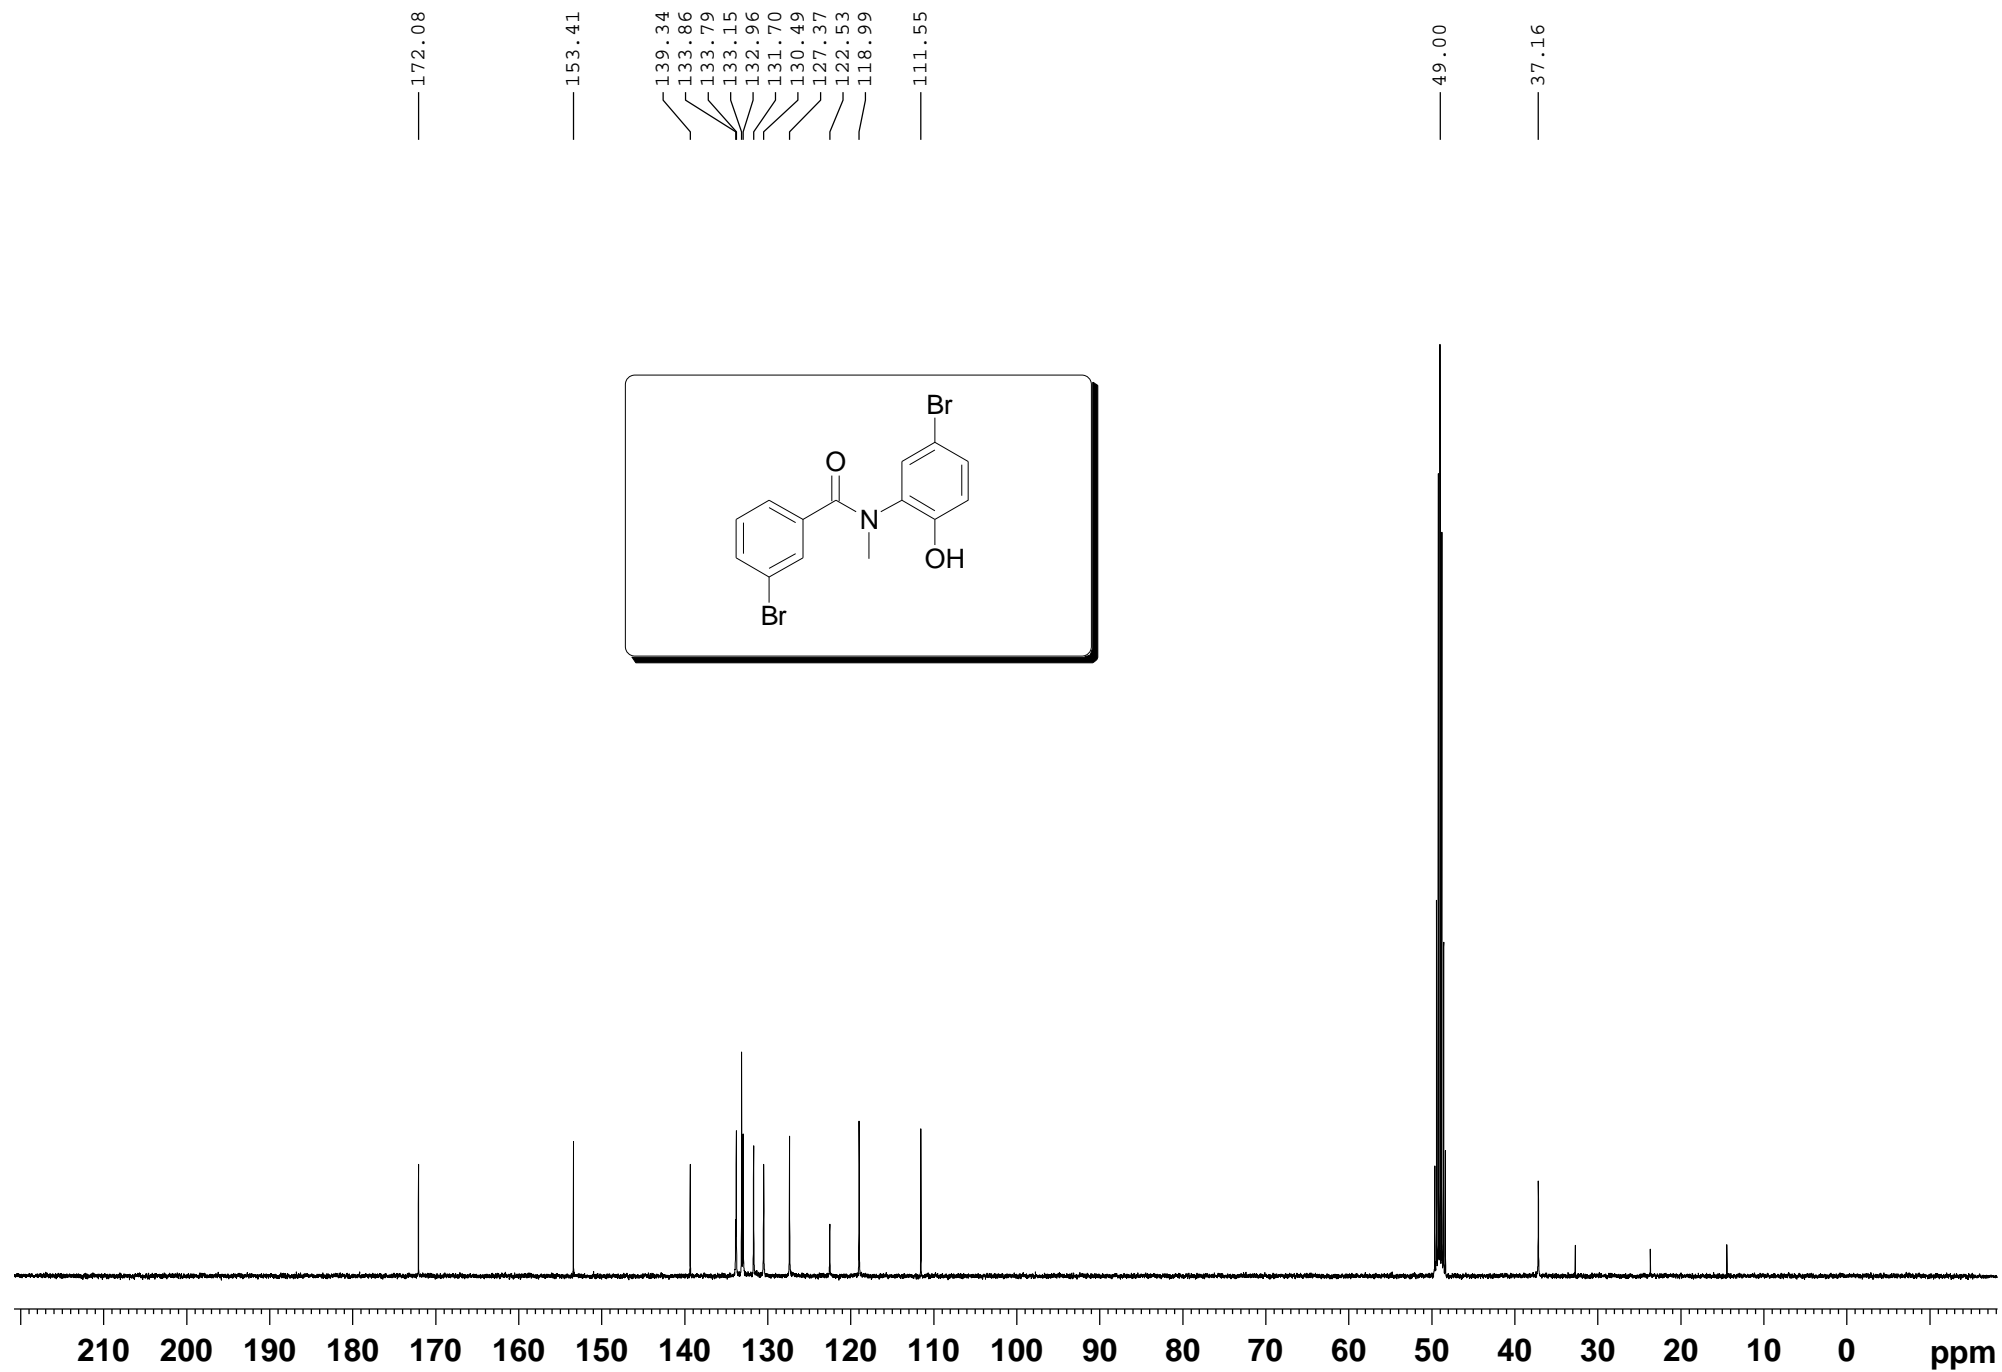

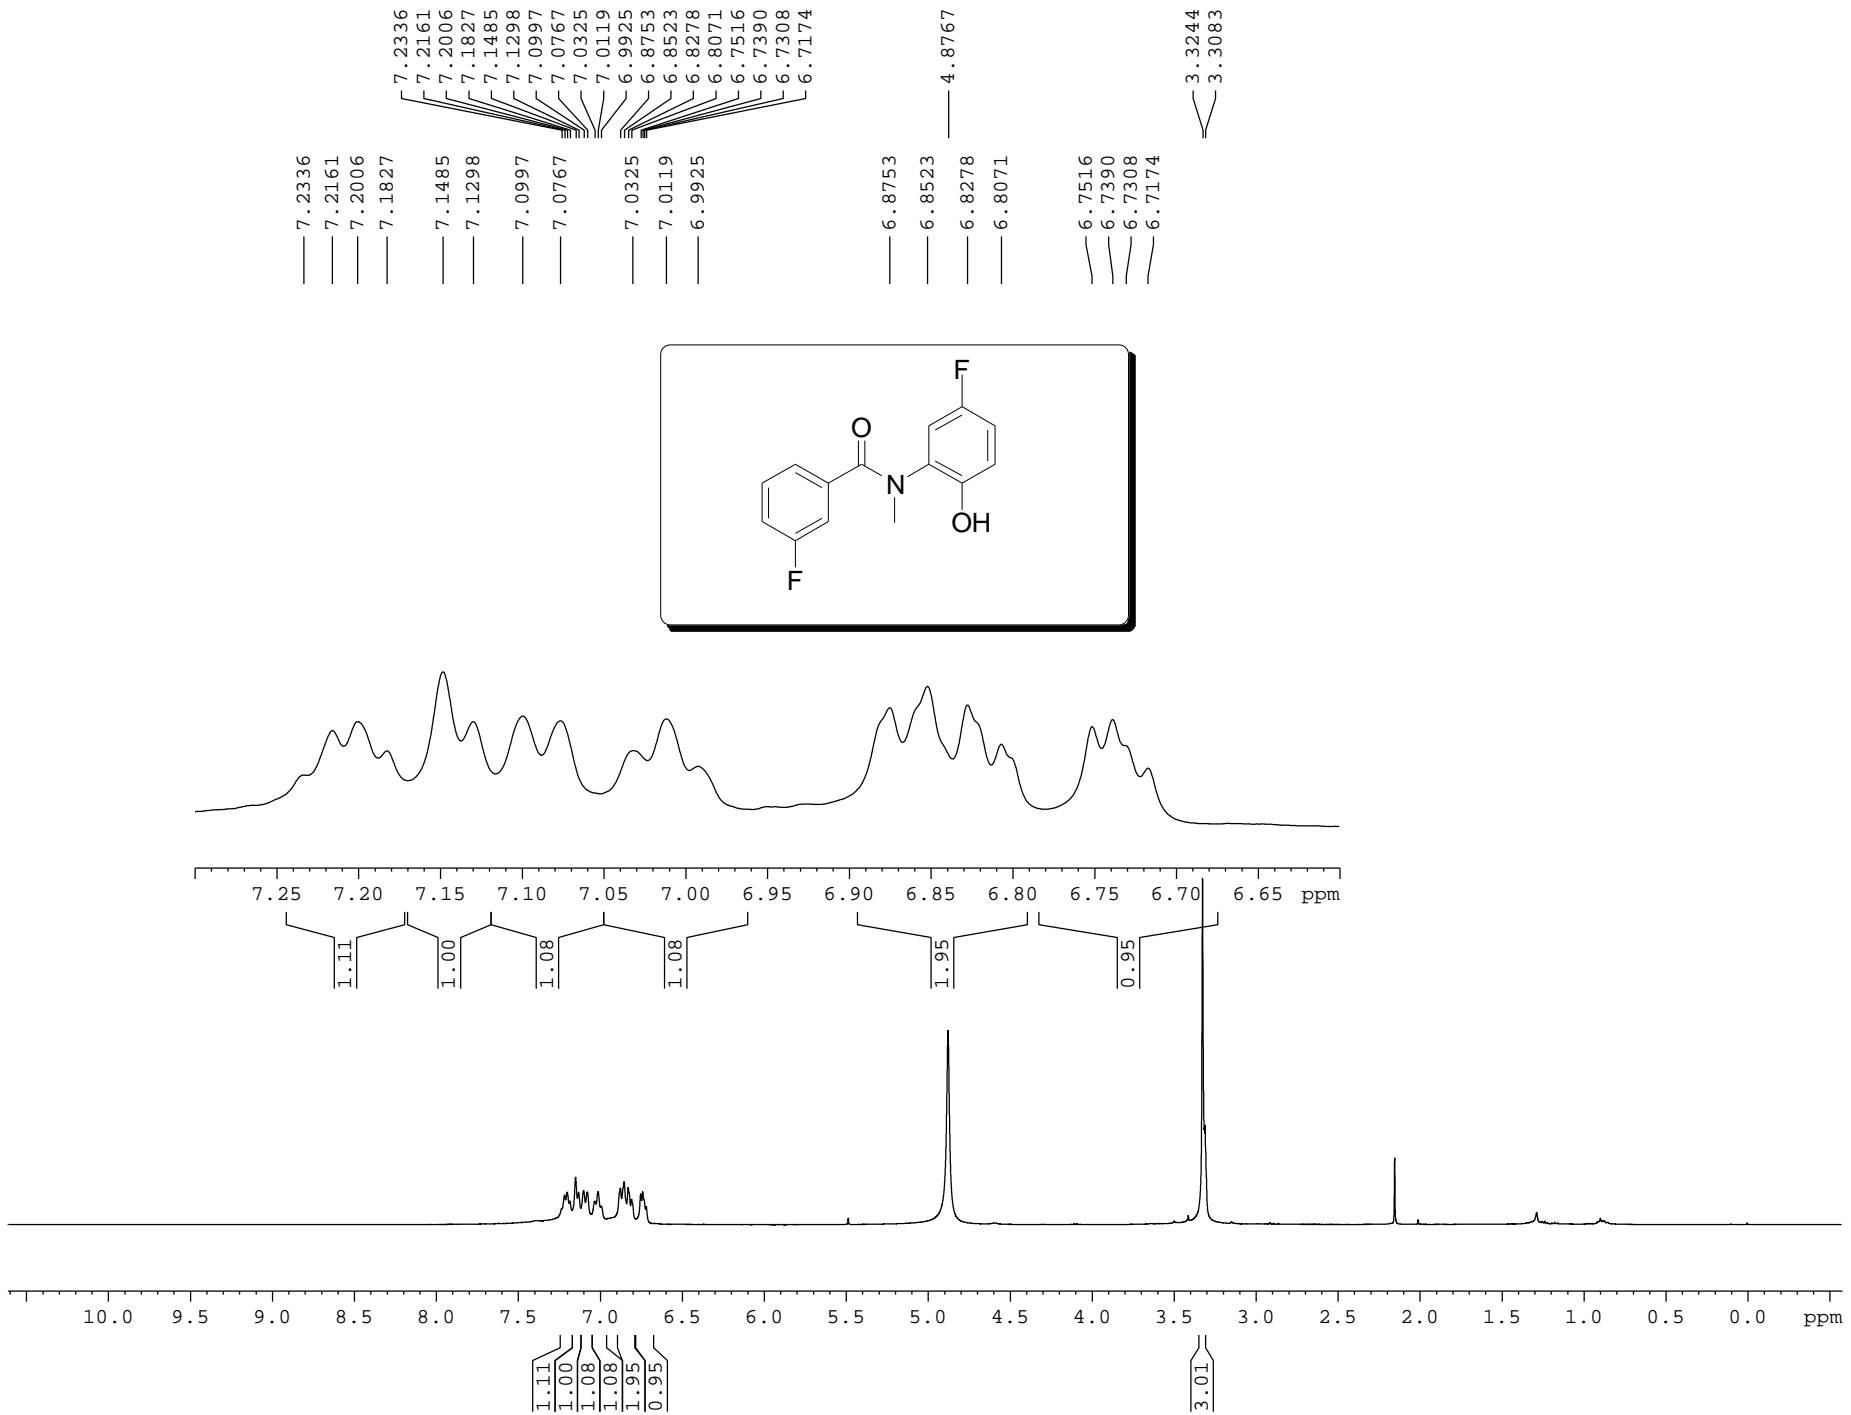

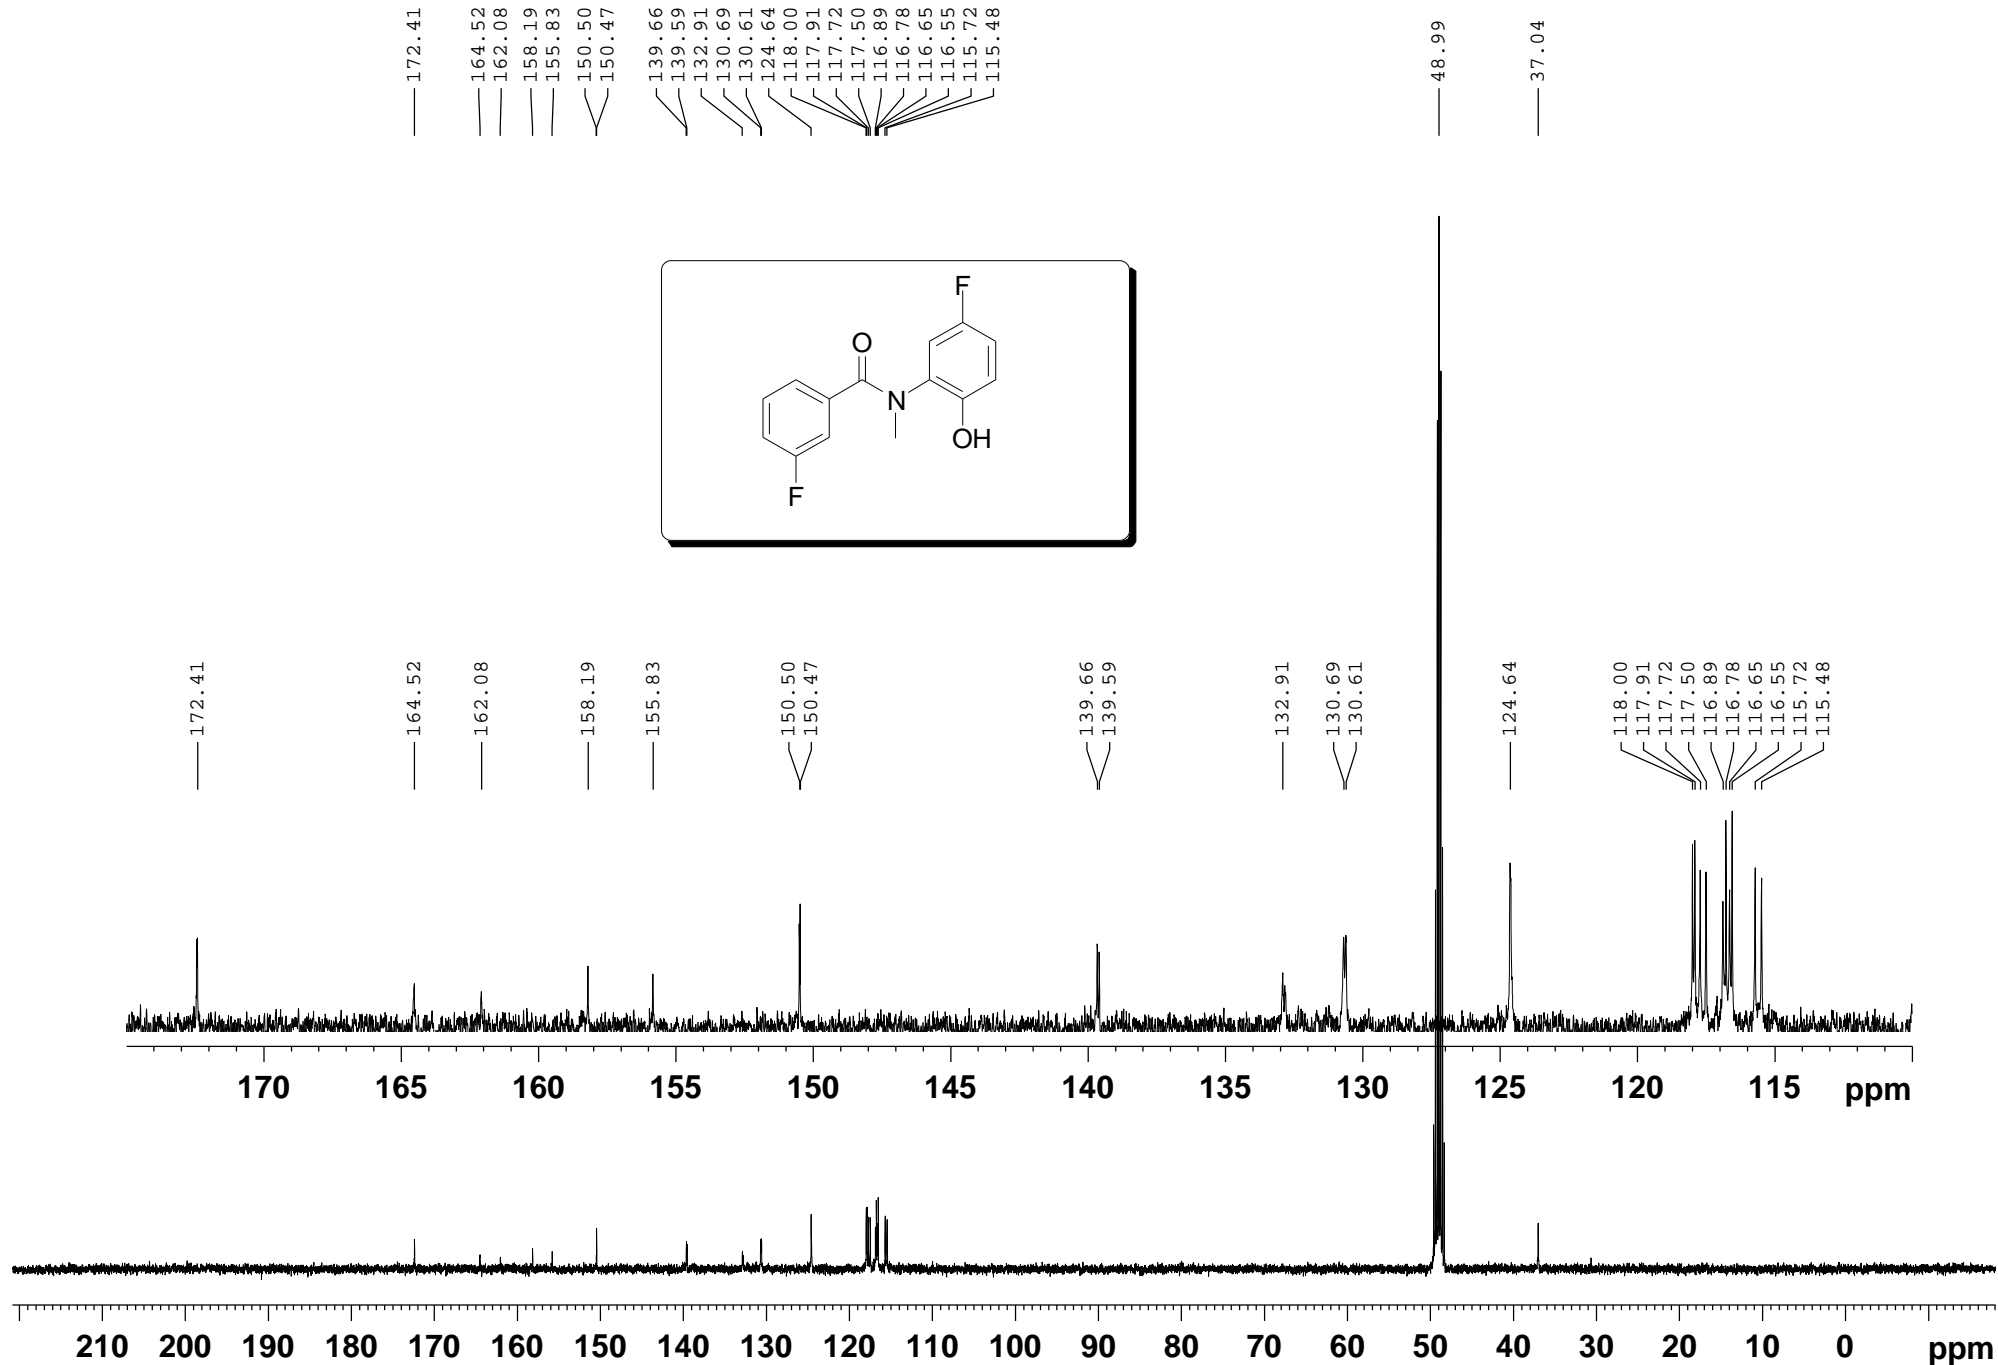

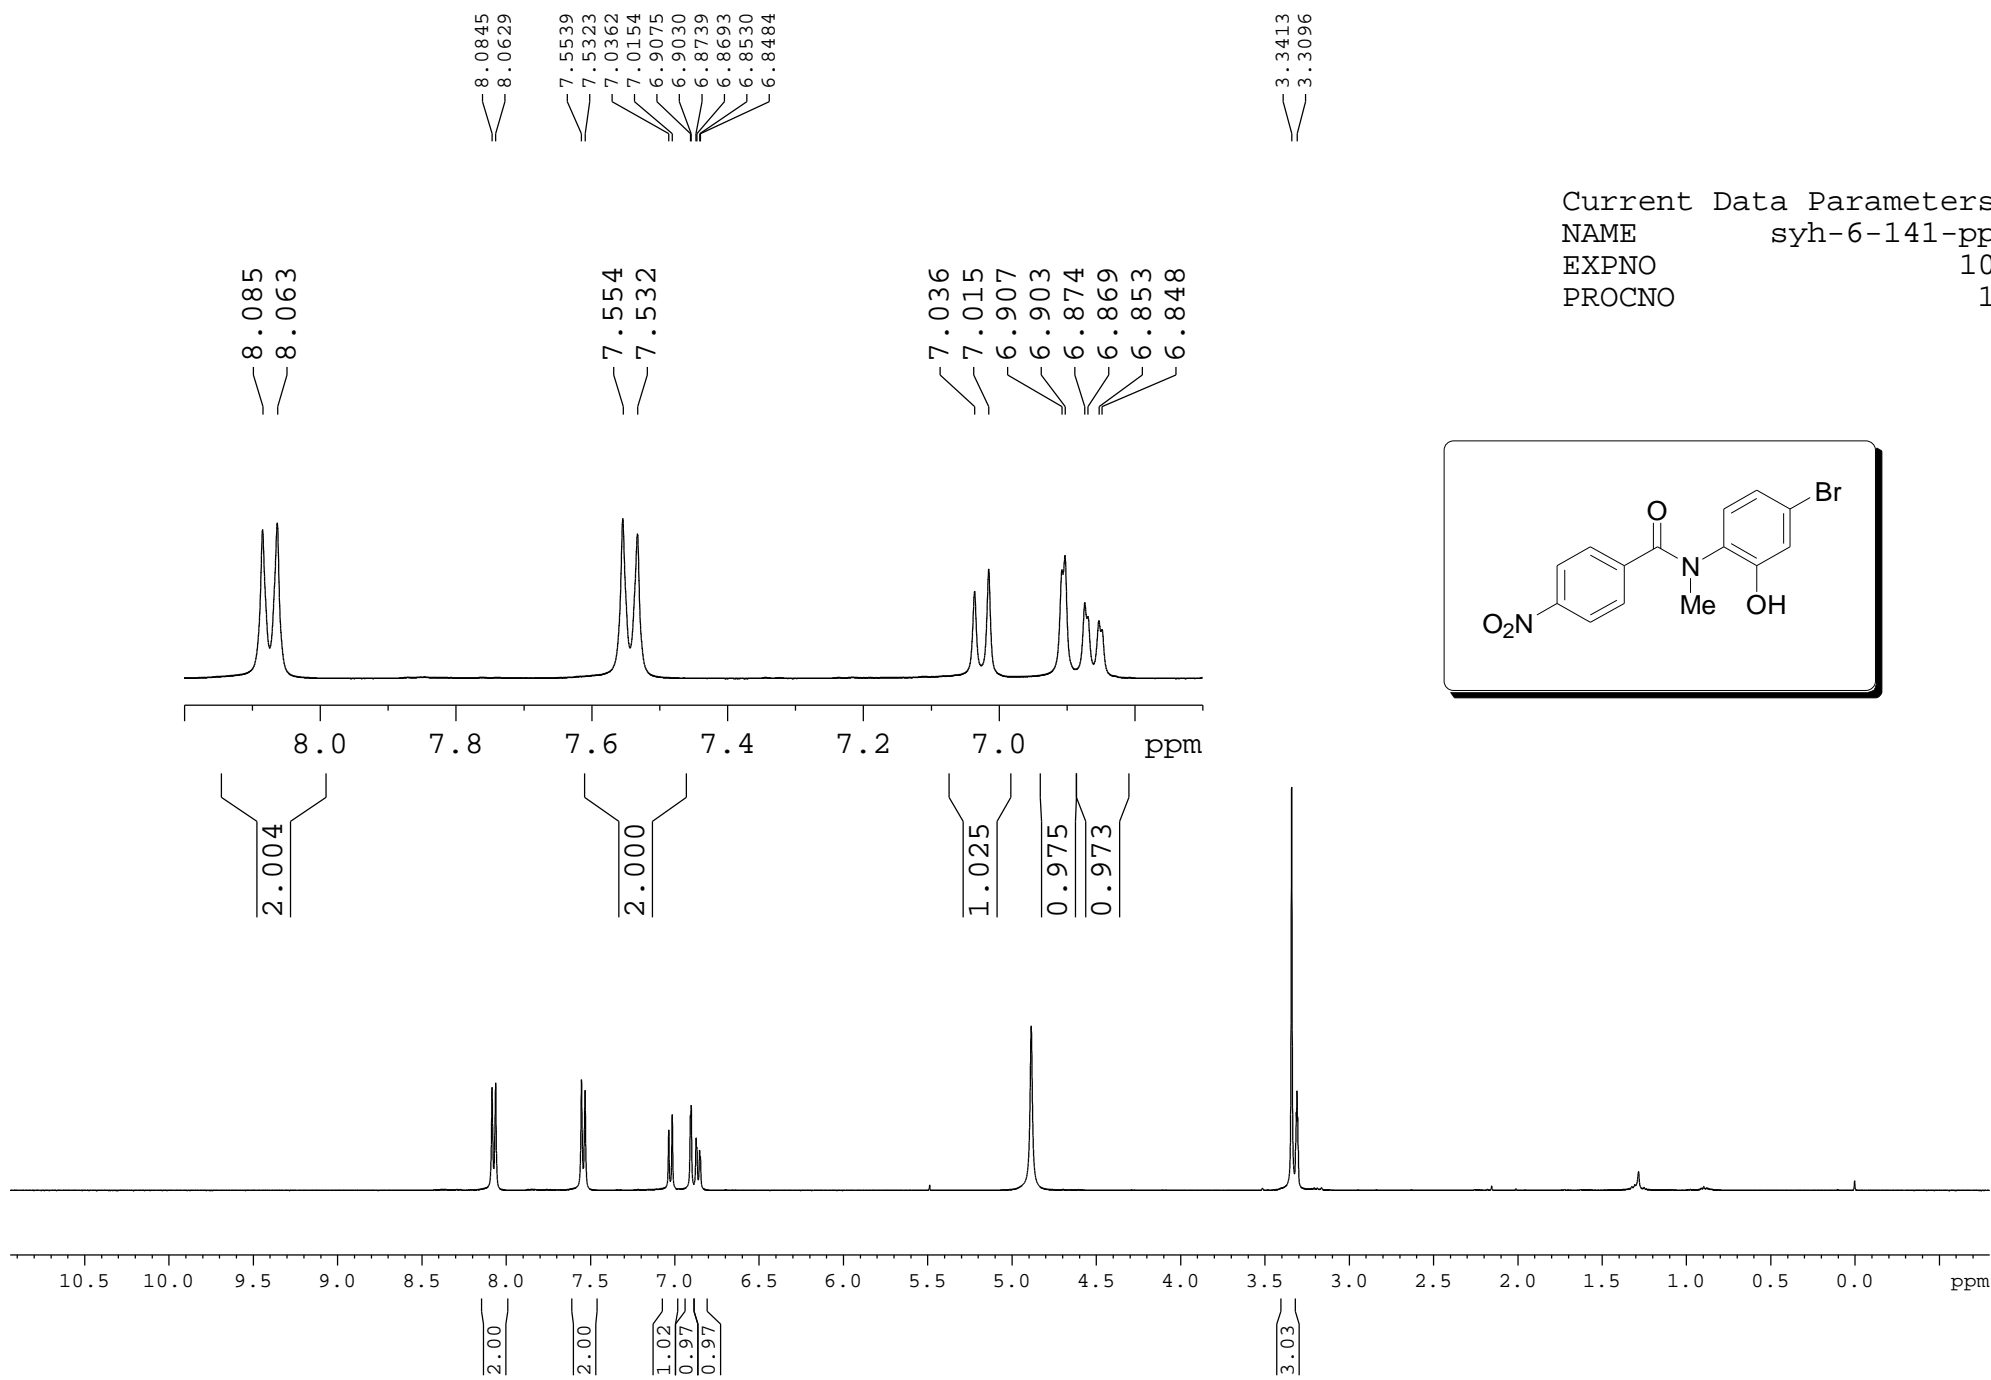

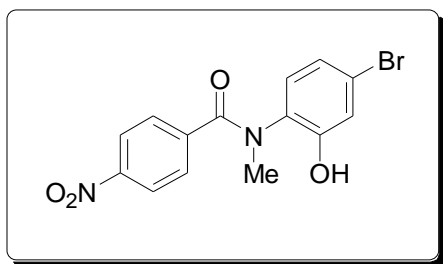

— 171.79

— 154.99

— 149.61

— 143.73

— 131.79  
 — 131.57  
 — 129.79  
 — 124.09  
 — 123.90  
 — 123.28  
 — 120.57

— 49.00

— 37.01

Current Data Parameters  
 NAME syh-6-141-pp-c  
 EXPNO 20  
 PROCNO 1

F2 - Acquisition Parameters  
 Date\_ 20141029  
 Time 18.18  
 INSTRUM spect  
 PROBHD 5 mm PABBO BB-  
 PULPROG zgpg30  
 TD 65536  
 SOLVENT MeOD  
 NS 400  
 DS 4  
 SWH 24038.461 Hz  
 FIDRES 0.366798 Hz  
 AQ 1.3631988 sec  
 RG 209.25  
 DW 20.800 usec  
 DE 6.50 usec  
 TE 297.4 K  
 D1 2.0000000 sec  
 D11 0.0300000 sec  
 TD0 1

==== CHANNEL f1 =====  
 NUC1 13C  
 P1 10.59 usec  
 PLW1 50.00299835 W  
 SFO1 100.6228293 MHz

==== CHANNEL f2 =====  
 CPDPRG2 waltz16  
 NUC2 1H  
 P1 90.00 usec  
 PLW2 13.00199986 W  
 PLW12 0.35303000 W  
 PLW13 0.28595001 W  
 SFO2 400.1316005 MHz

F2 - Processing parameters  
 SI 32768  
 SF 100.6126280 MHz  
 WDW EM  
 SSB 0  
 LB 1.00 Hz  
 GB 0  
 PC 1.40

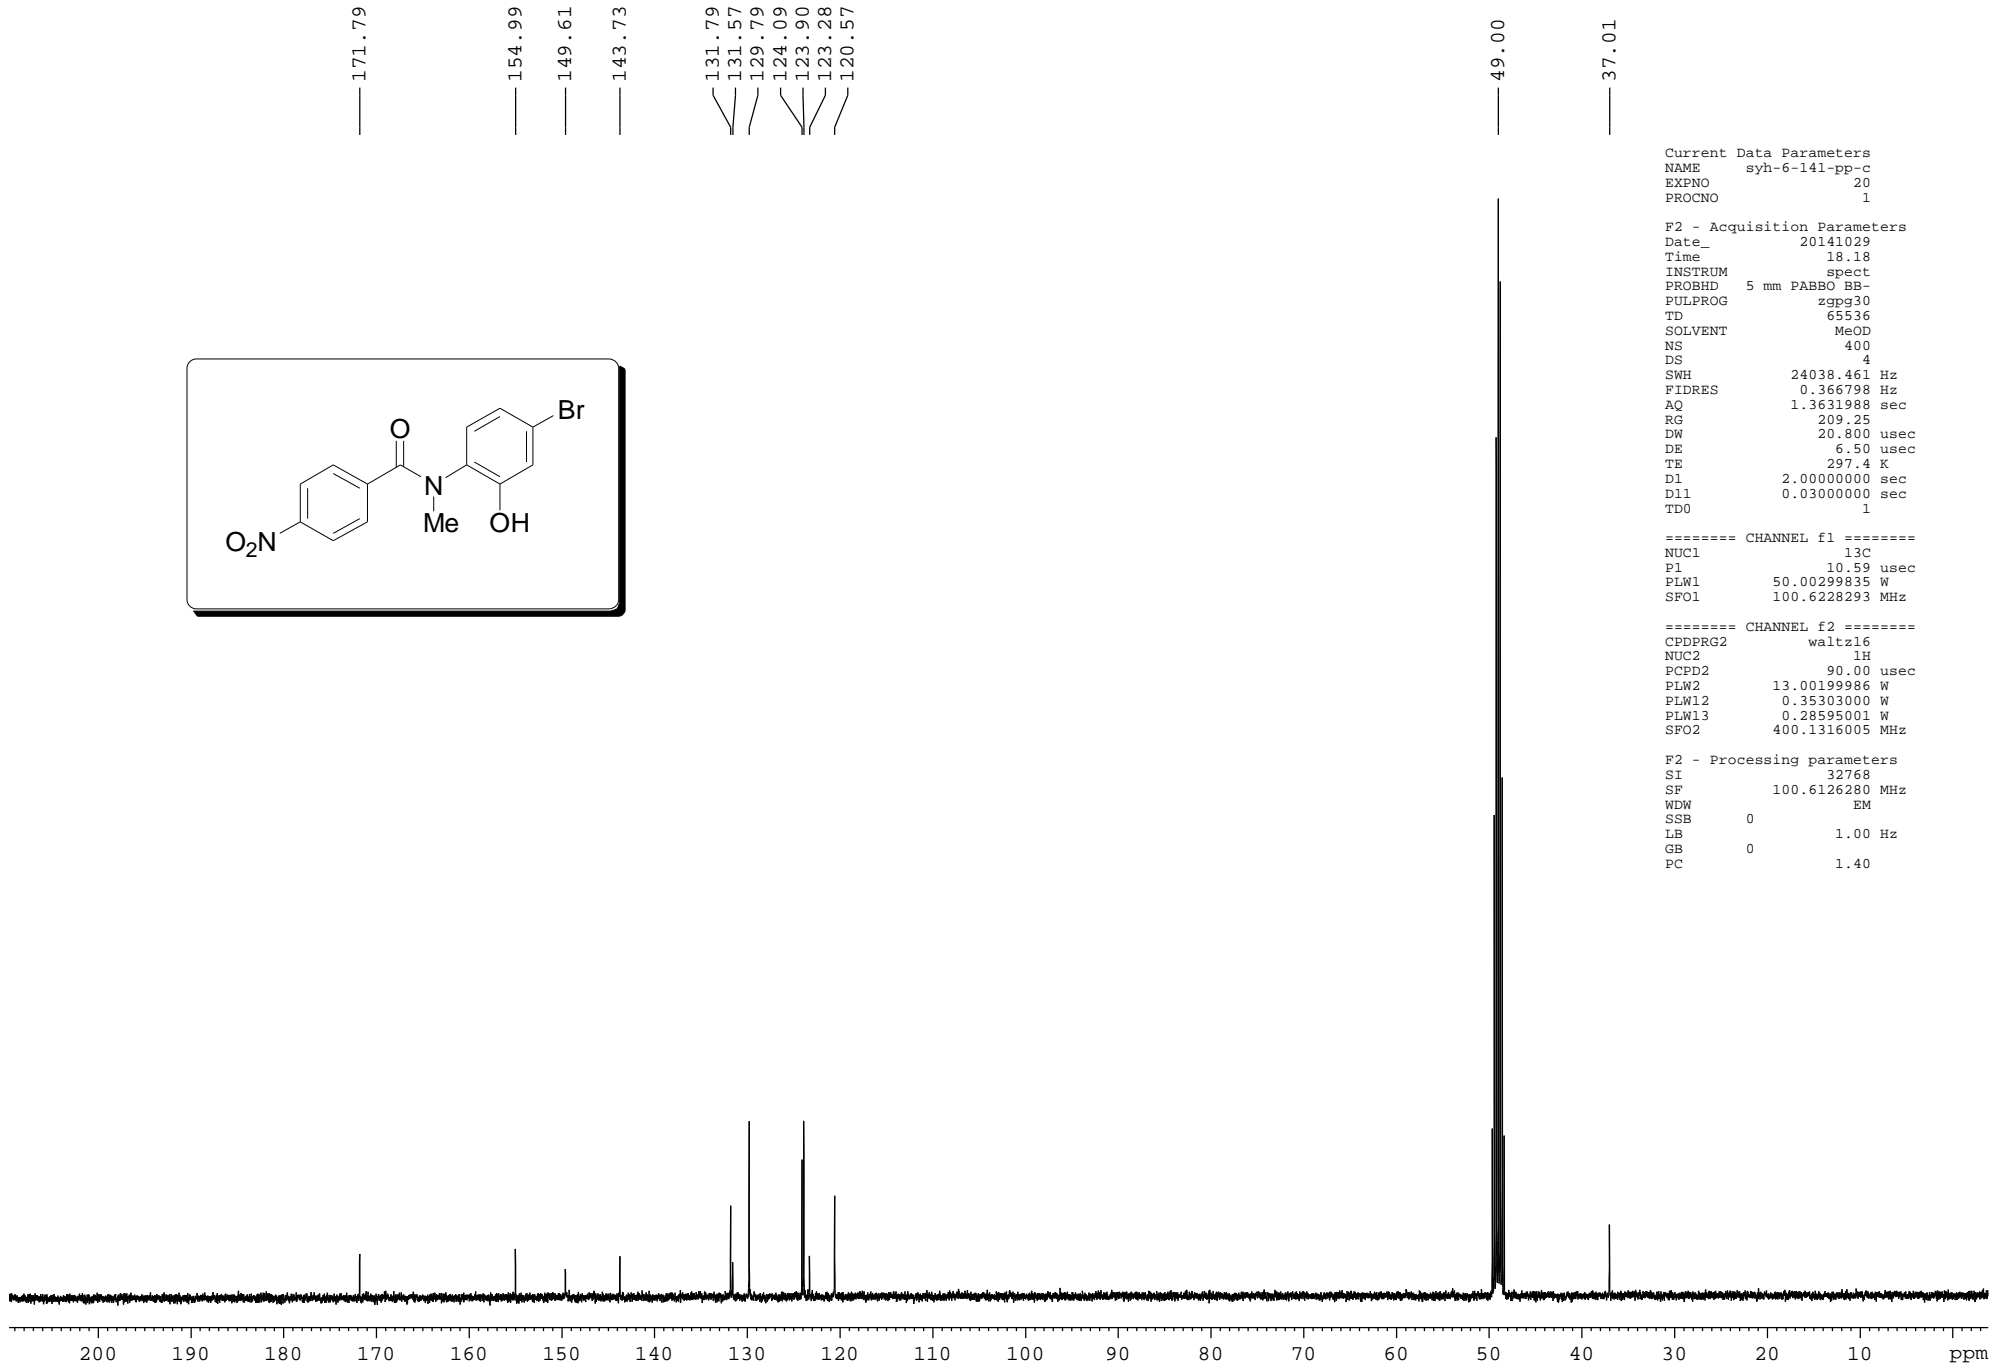

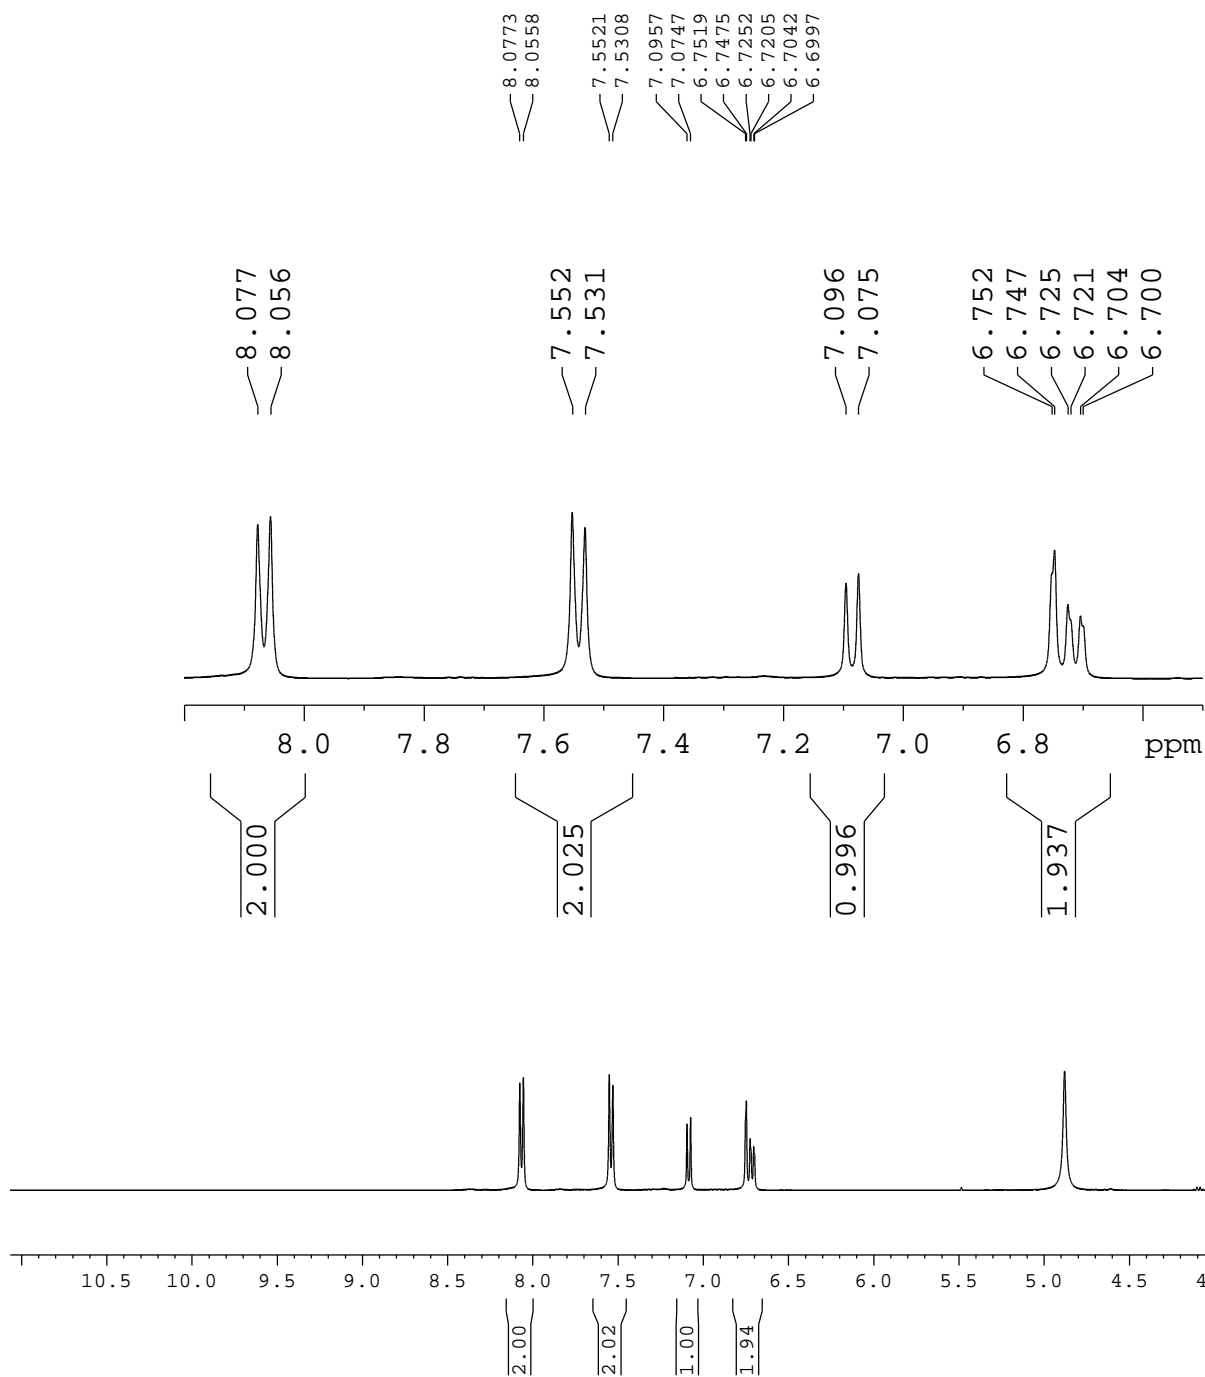

Current Data Parameters  
 NAME syh-6-143  
 EXPNO 10  
 PROCNO 1

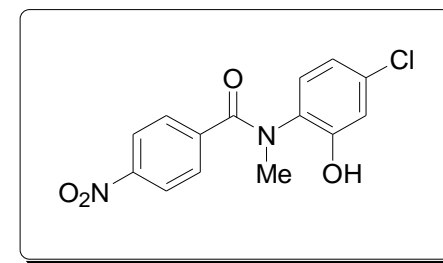

— 171.83  
 — 154.81  
 — 149.57  
 — 143.73  
 — 135.57  
 — 131.47  
 — 131.08  
 — 129.76  
 — 123.87  
 — 121.06  
 — 117.54

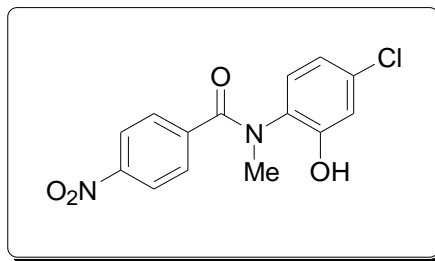

— 48.99

— 37.04

Current Data Parameters  
 NAME syh-6-143-c  
 EXPNO 20  
 PROCNO 1

F2 - Acquisition Parameters  
 Date\_ 20141029  
 Time 4.48  
 INSTRUM spect  
 PROBHD 5 mm PABBO BB-  
 PULPROG zgpg30  
 TD 65536  
 SOLVENT MeOD  
 NS 400  
 DS 4  
 SWH 24038.461 Hz  
 FIDRES 0.366798 Hz  
 AQ 1.3631988 sec  
 RG 209.25  
 DW 20.800 usec  
 DE 6.50 usec  
 TE 298.5 K  
 D1 2.0000000 sec  
 D11 0.0300000 sec  
 TD0 1

===== CHANNEL f1 =====  
 NUC1 13C  
 P1 10.59 usec  
 PLW1 50.00299835 W  
 SFO1 100.6228293 MHz

===== CHANNEL f2 =====  
 CPDPRG2 waltz16  
 NUC2 1H  
 P1 90.00 usec  
 PLW2 13.00199986 W  
 PLW12 0.35303000 W  
 PLW13 0.28595001 W  
 SFO2 400.1316005 MHz

F2 - Processing parameters  
 SI 32768  
 SF 100.6126304 MHz  
 WDW EM  
 SSB 0  
 LB 1.00 Hz  
 GB 0  
 PC 1.40

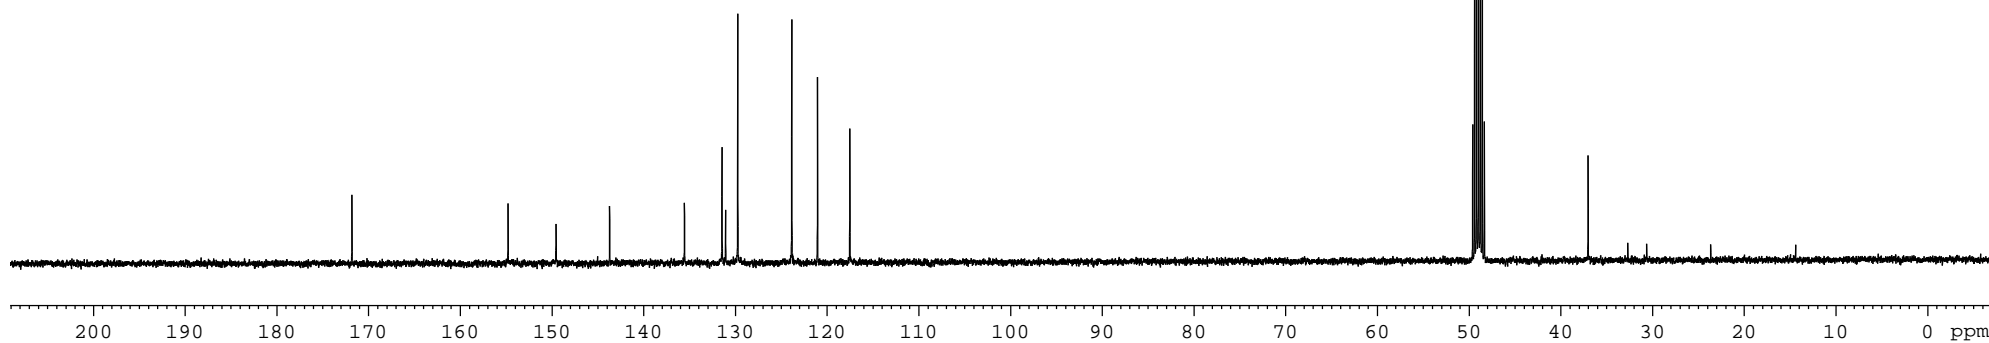



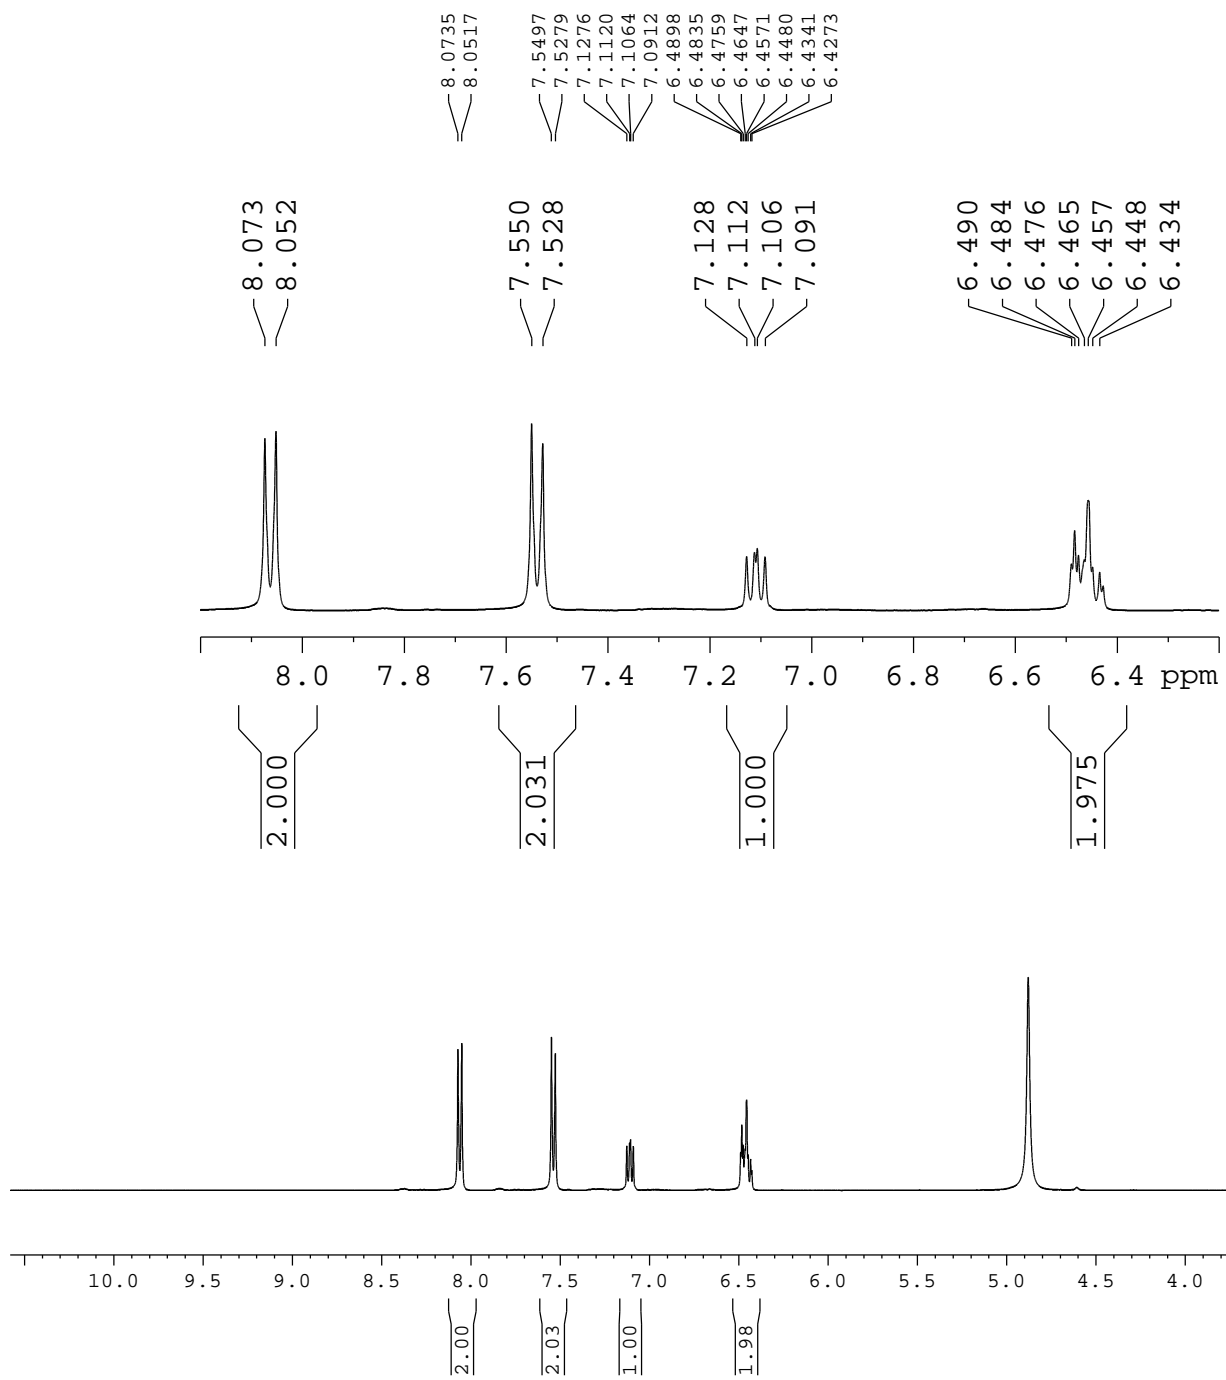

3.3400  
3.3088

Current Data Parameters  
 NAME syh-6-145  
 EXPNO 10  
 PROCNO 1

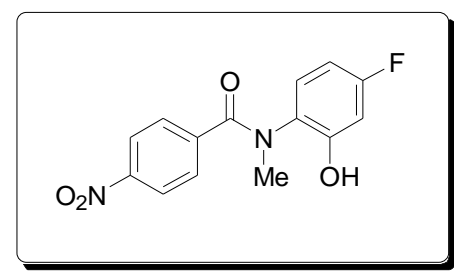

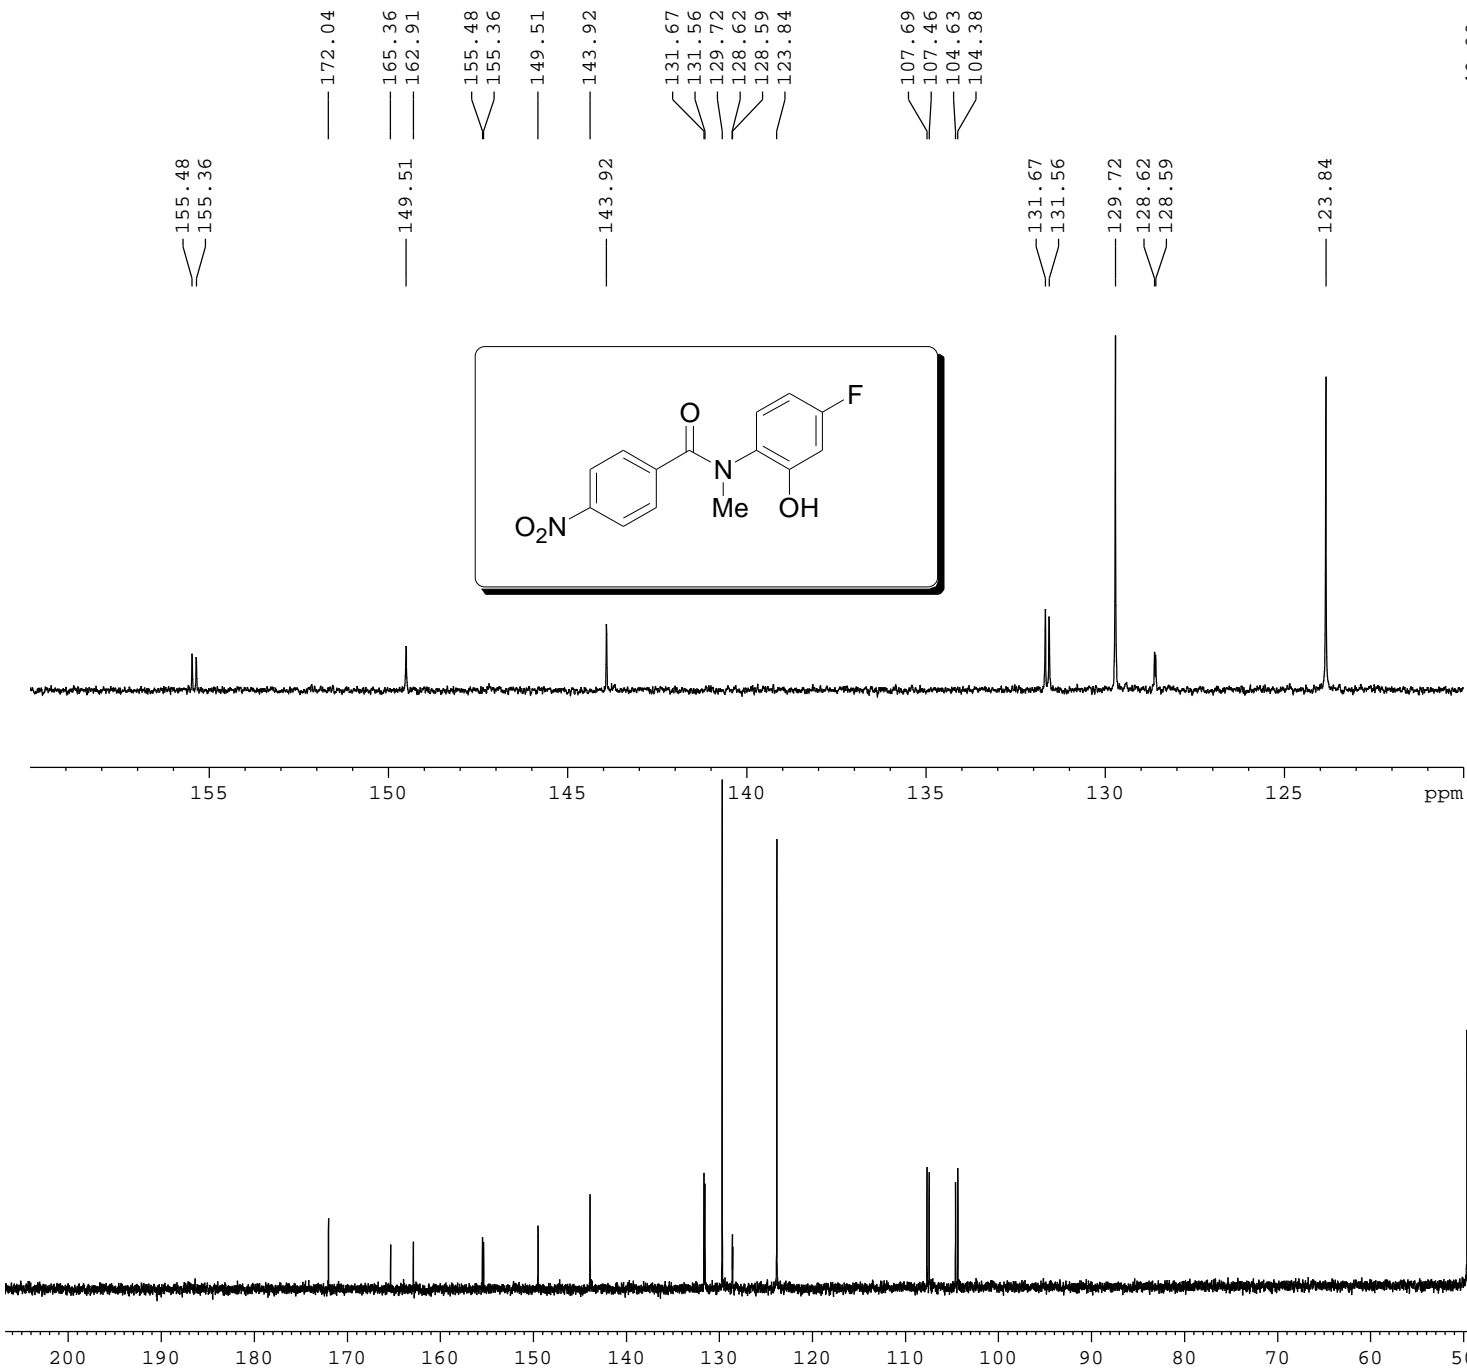

Current Data Parameters  
 NAME syh-6-145-c  
 EXPNO 20  
 PROCNO 1

F2 - Acquisition Parameters  
 Date\_ 20141030  
 Time 18.37  
 INSTRUM spect  
 PROBHD 5 mm PABBO BB-  
 PULPROG zgpg30  
 TD 65536  
 SOLVENT MeOD  
 NS 600  
 DS 4  
 SWH 24038.461 Hz  
 FIDRES 0.366798 Hz  
 AQ 1.3631988 sec  
 RG 209.25  
 DW 20.800 usec  
 DE 6.50 usec  
 TE 297.8 K  
 D1 2.00000000 sec  
 D11 0.03000000 sec  
 TD0 1

===== CHANNEL f1 =====  
 NUC1 13C  
 P1 10.59 usec  
 PLW1 50.00299835 W  
 SFO1 100.6228293 MHz

===== CHANNEL f2 =====  
 CPDPRG2 waltz16  
 NUC2 1H  
 PCPD2 90.00 usec  
 PLW2 13.00199986 W  
 PLW12 0.35303000 W  
 PLW13 0.28595001 W  
 SFO2 400.1316005 MHz

F2 - Processing parameters  
 SI 32768  
 SF 100.6126280 MHz  
 WDW EM  
 SSB 0  
 LB 1.00 Hz  
 GB 0  
 PC 1.40

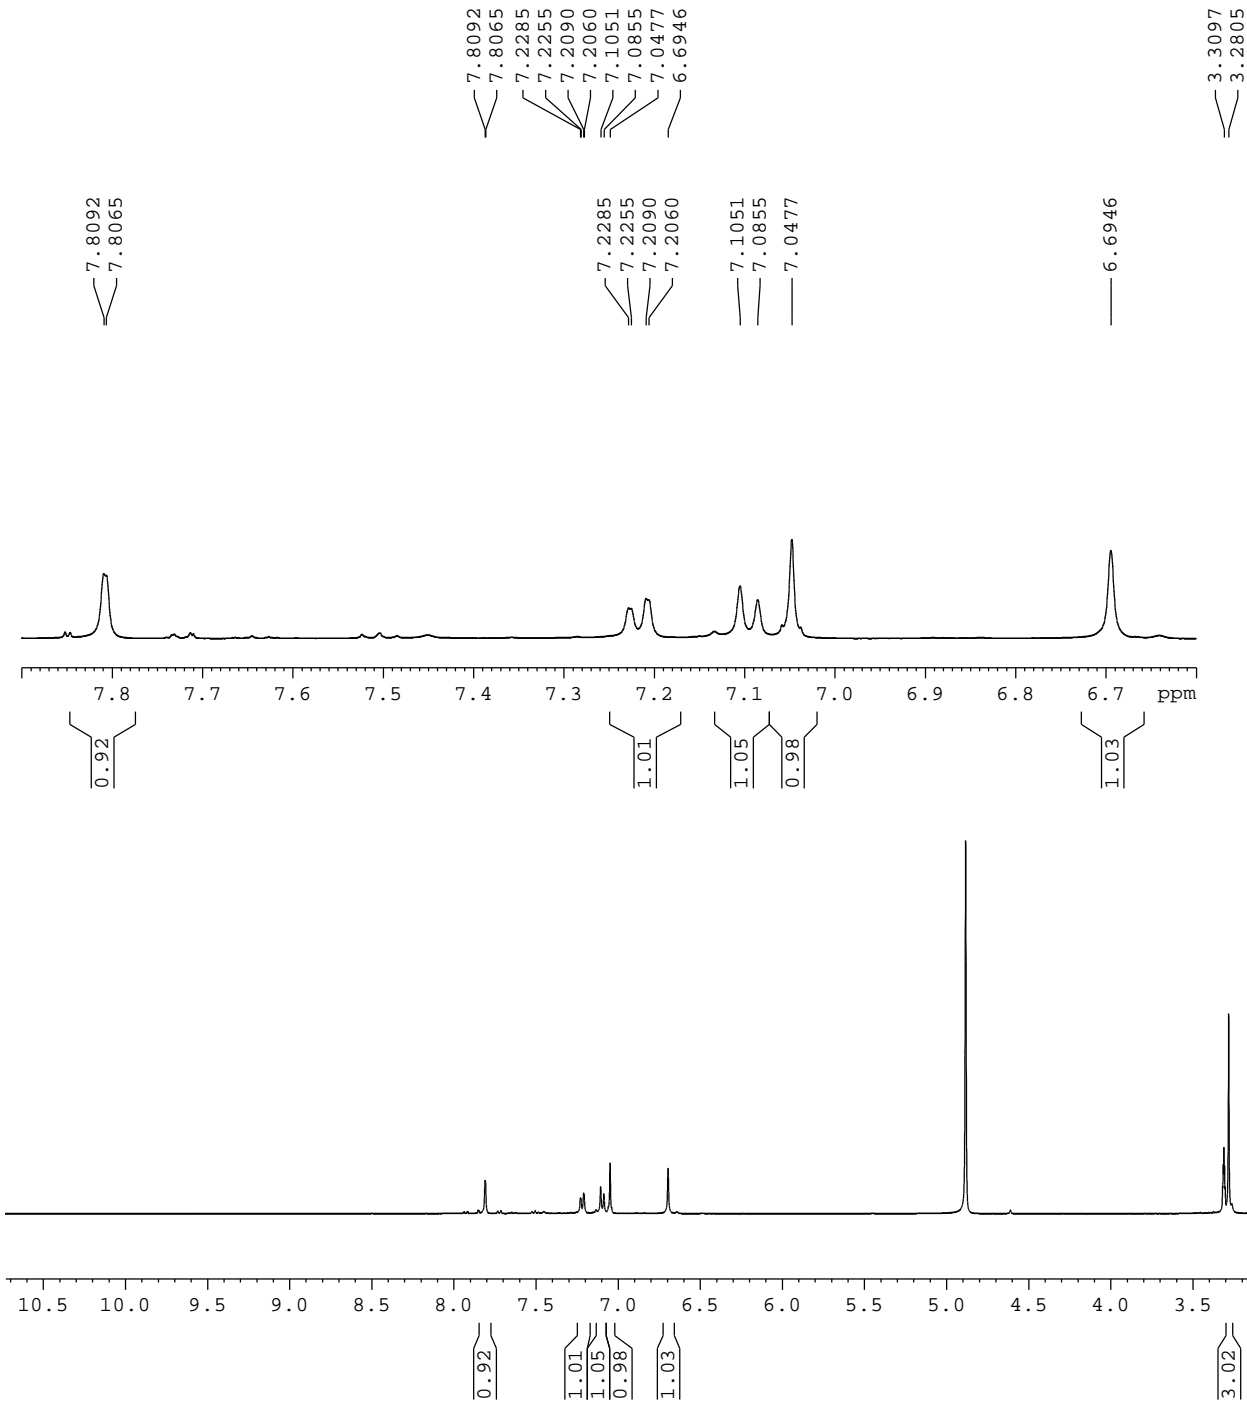

Current Data Parameters  
 NAME syh-6-57-2-2  
 EXPNO 10  
 PROCNO 1

F2 - Acquisition Parameters  
 Date\_ 20140911  
 Time 11.46  
 INSTRUM spect  
 PROBHD 5 mm PABBO BB/  
 PULPROG zg30  
 TD 65536  
 SOLVENT MeOD

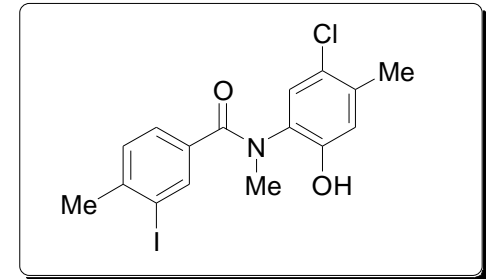

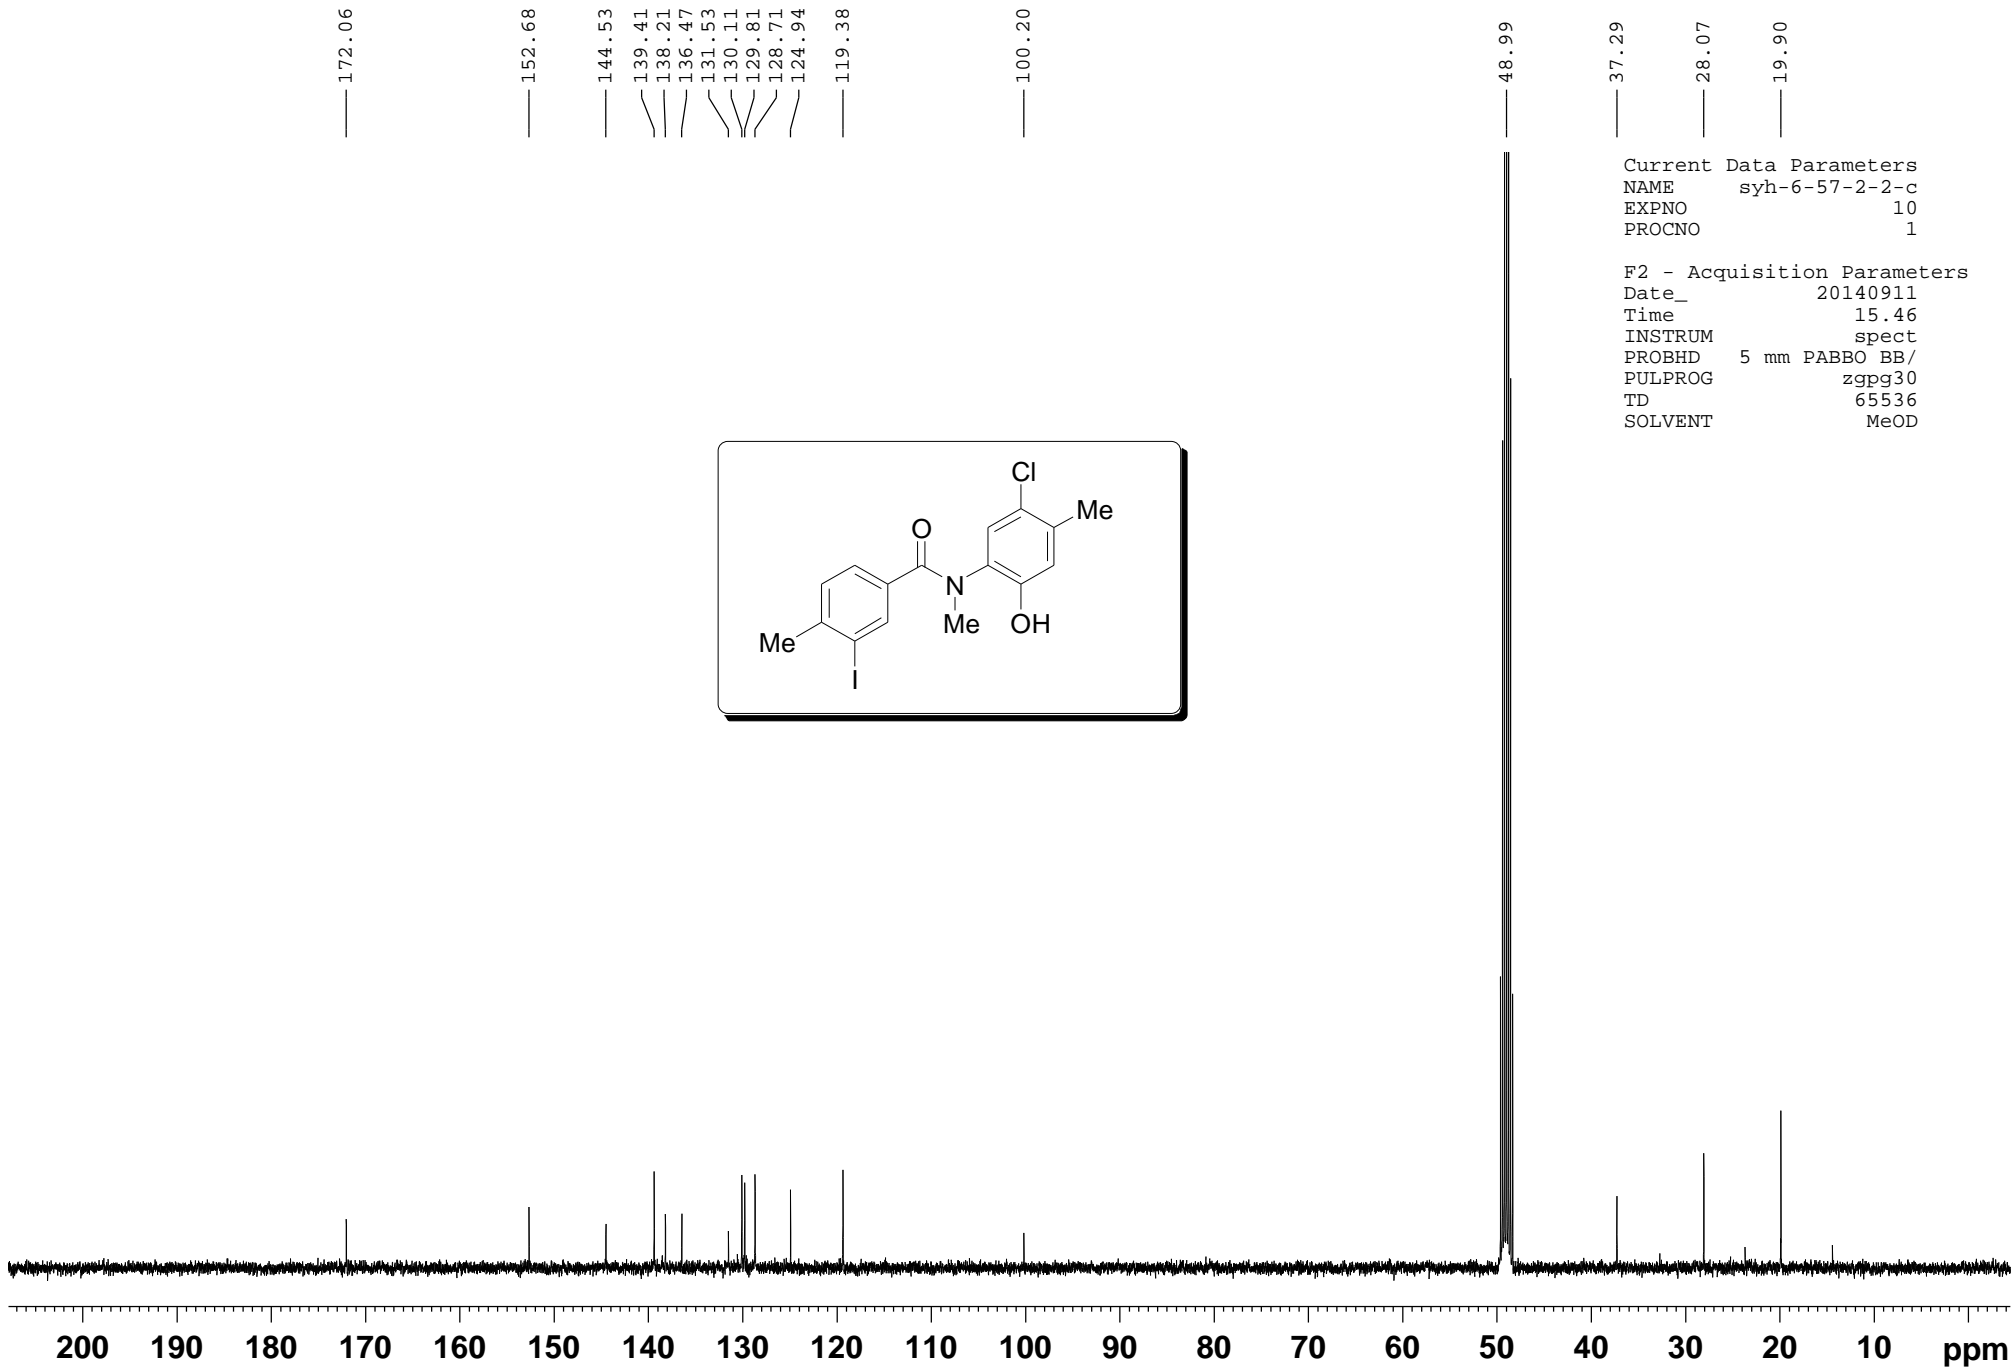

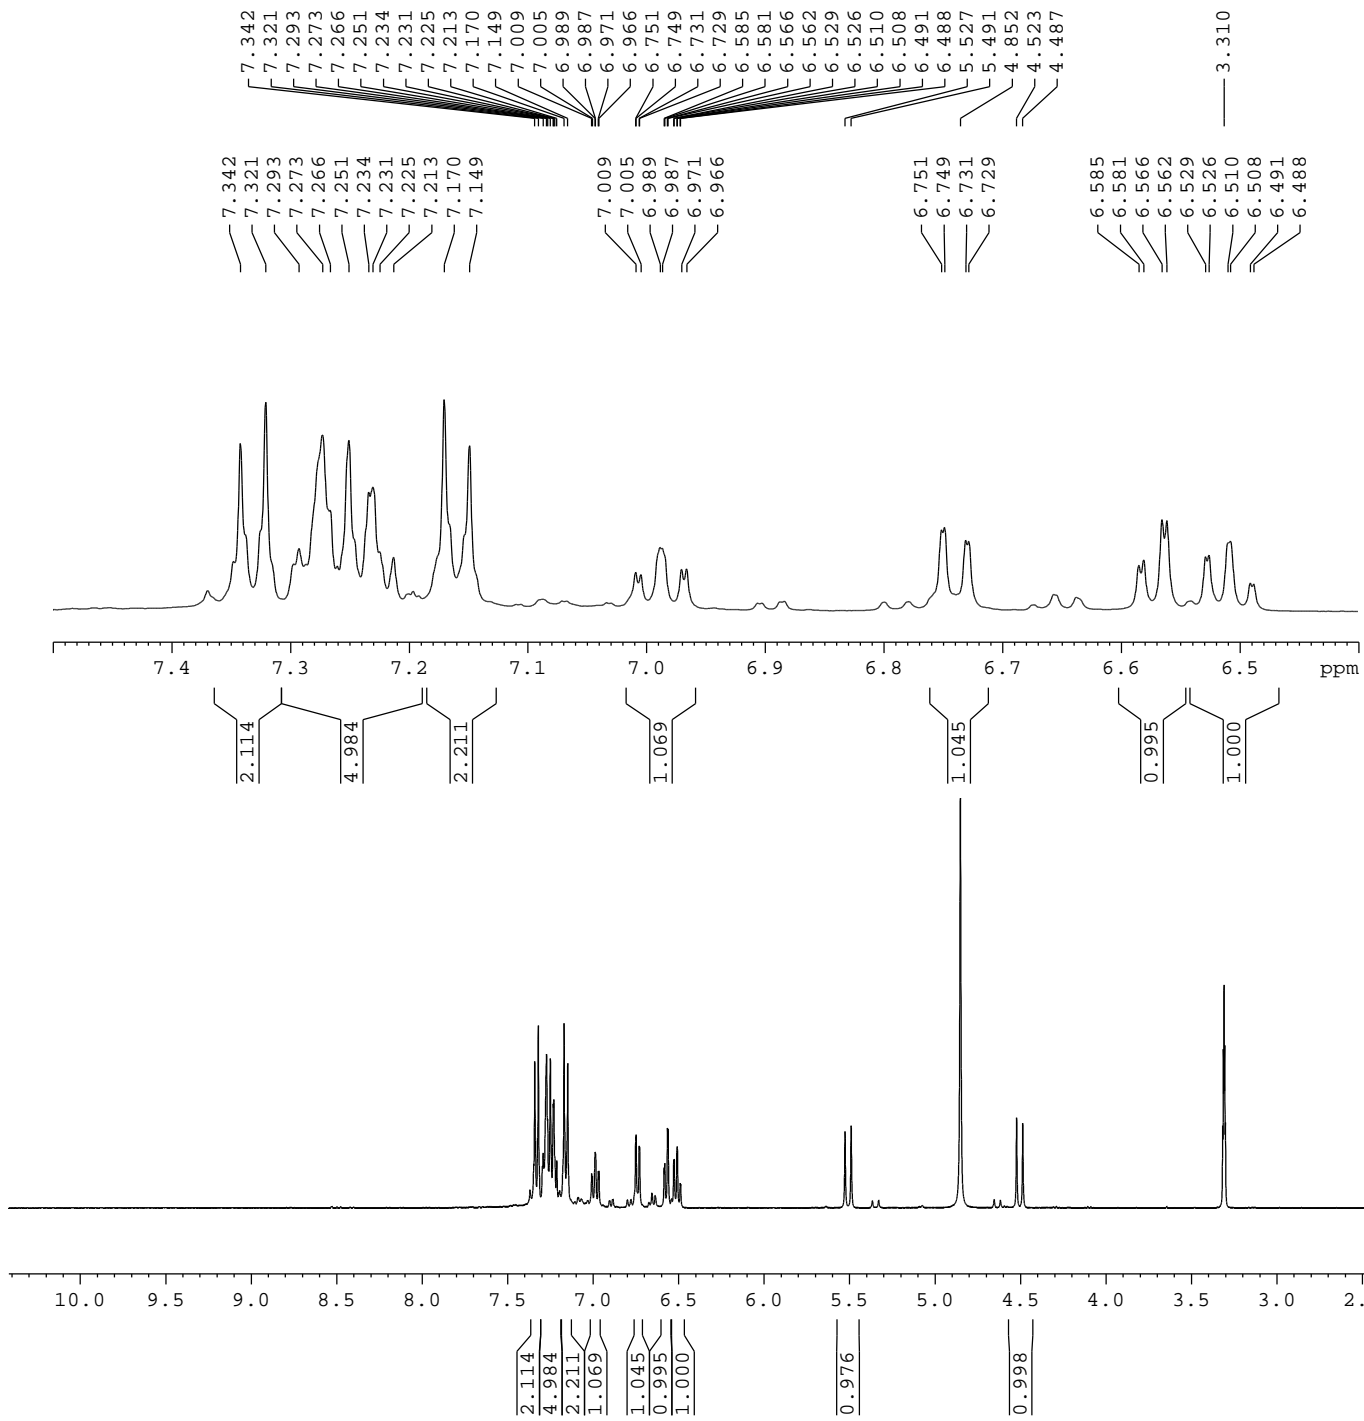

Current Data Parameters  
 NAME syh-7-73-p  
 EXPNO 10  
 PROCNO 1

F2 - Acquisition Parameters  
 Date\_ 20150131  
 Time 17.56  
 INSTRUM spect  
 PROBHD 5 mm PABBO BB/  
 PULPROG zg30  
 TD 65536  
 SOLVENT MeOD

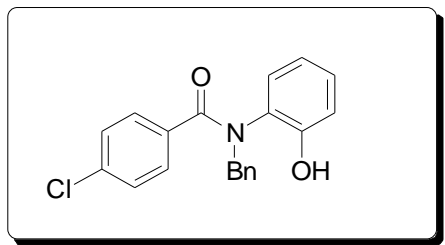

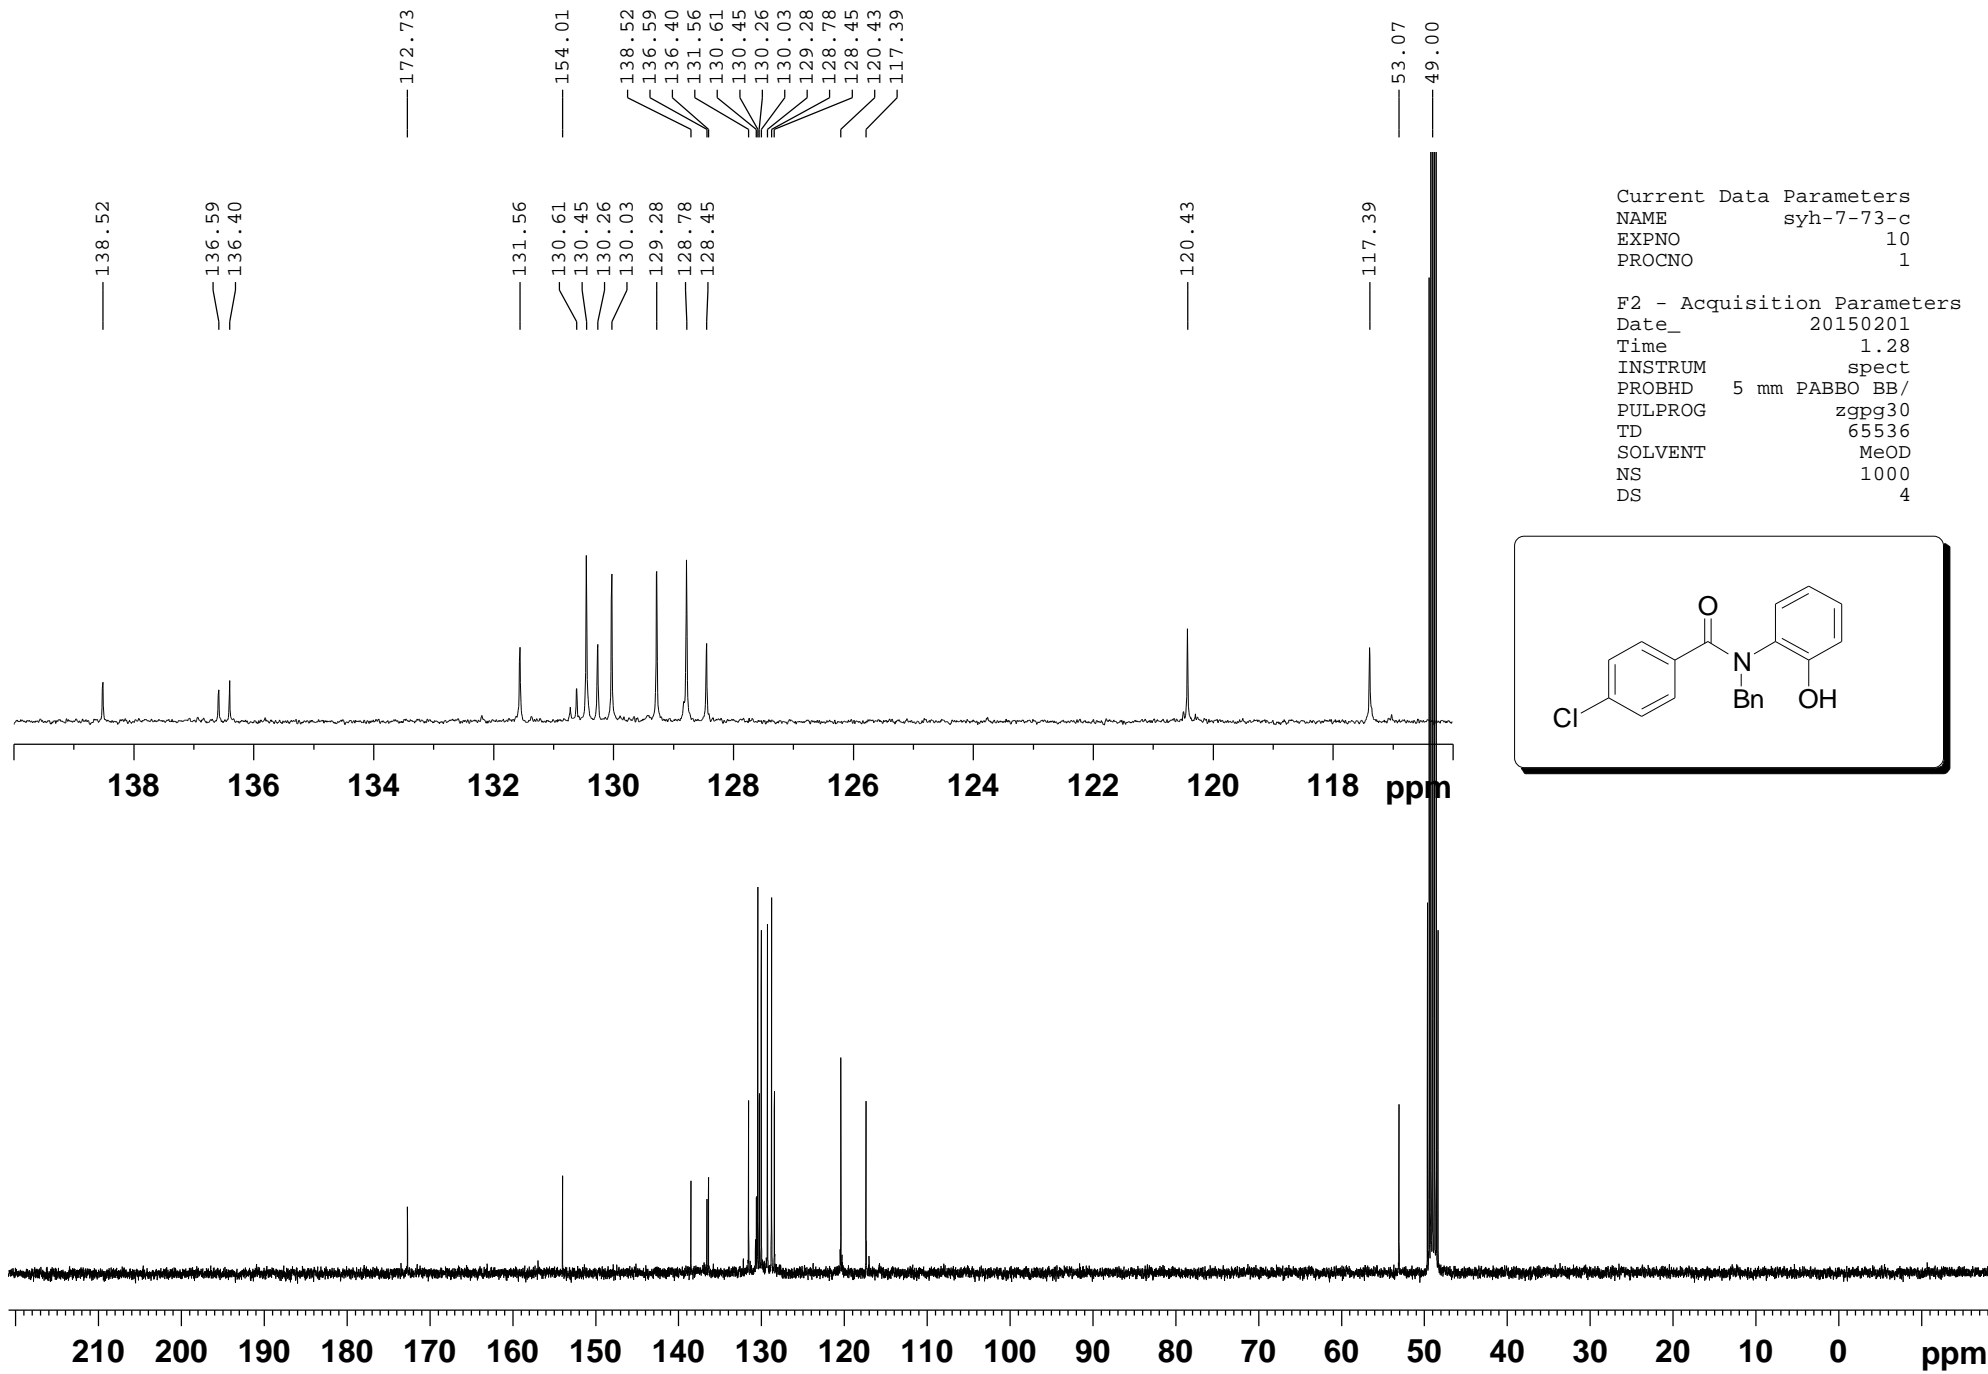

Current Data Parameters  
 NAME syh-7-73-c  
 EXPNO 10  
 PROCNO 1

F2 - Acquisition Parameters  
 Date\_ 20150201  
 Time 1.28  
 INSTRUM spect  
 PROBHD 5 mm PABBO BB/  
 PULPROG zgpg30  
 TD 65536  
 SOLVENT MeOD  
 NS 1000  
 DS 4

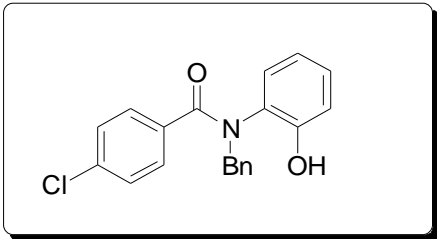

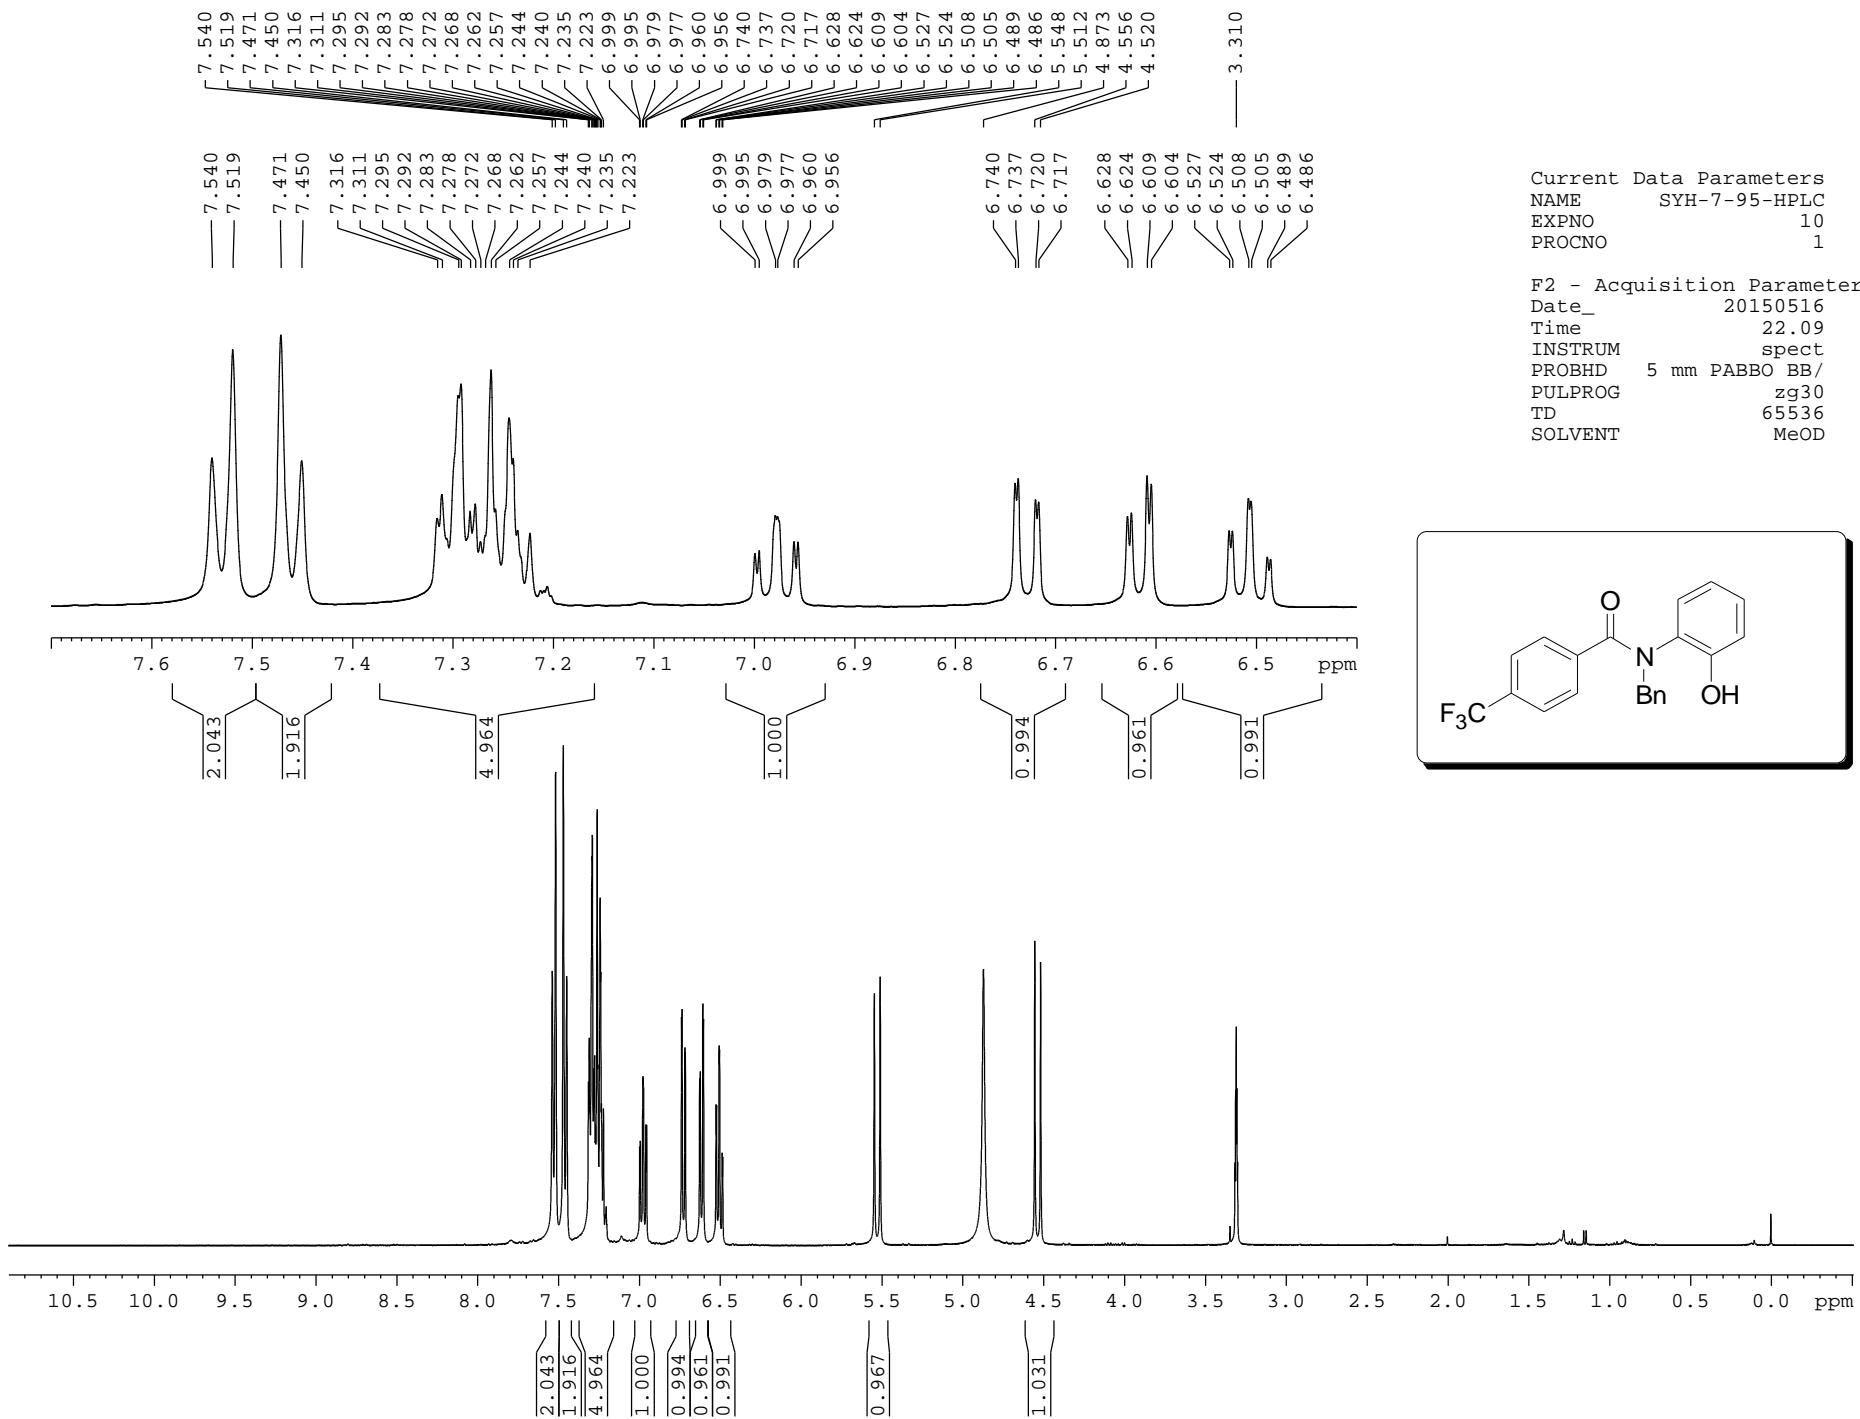

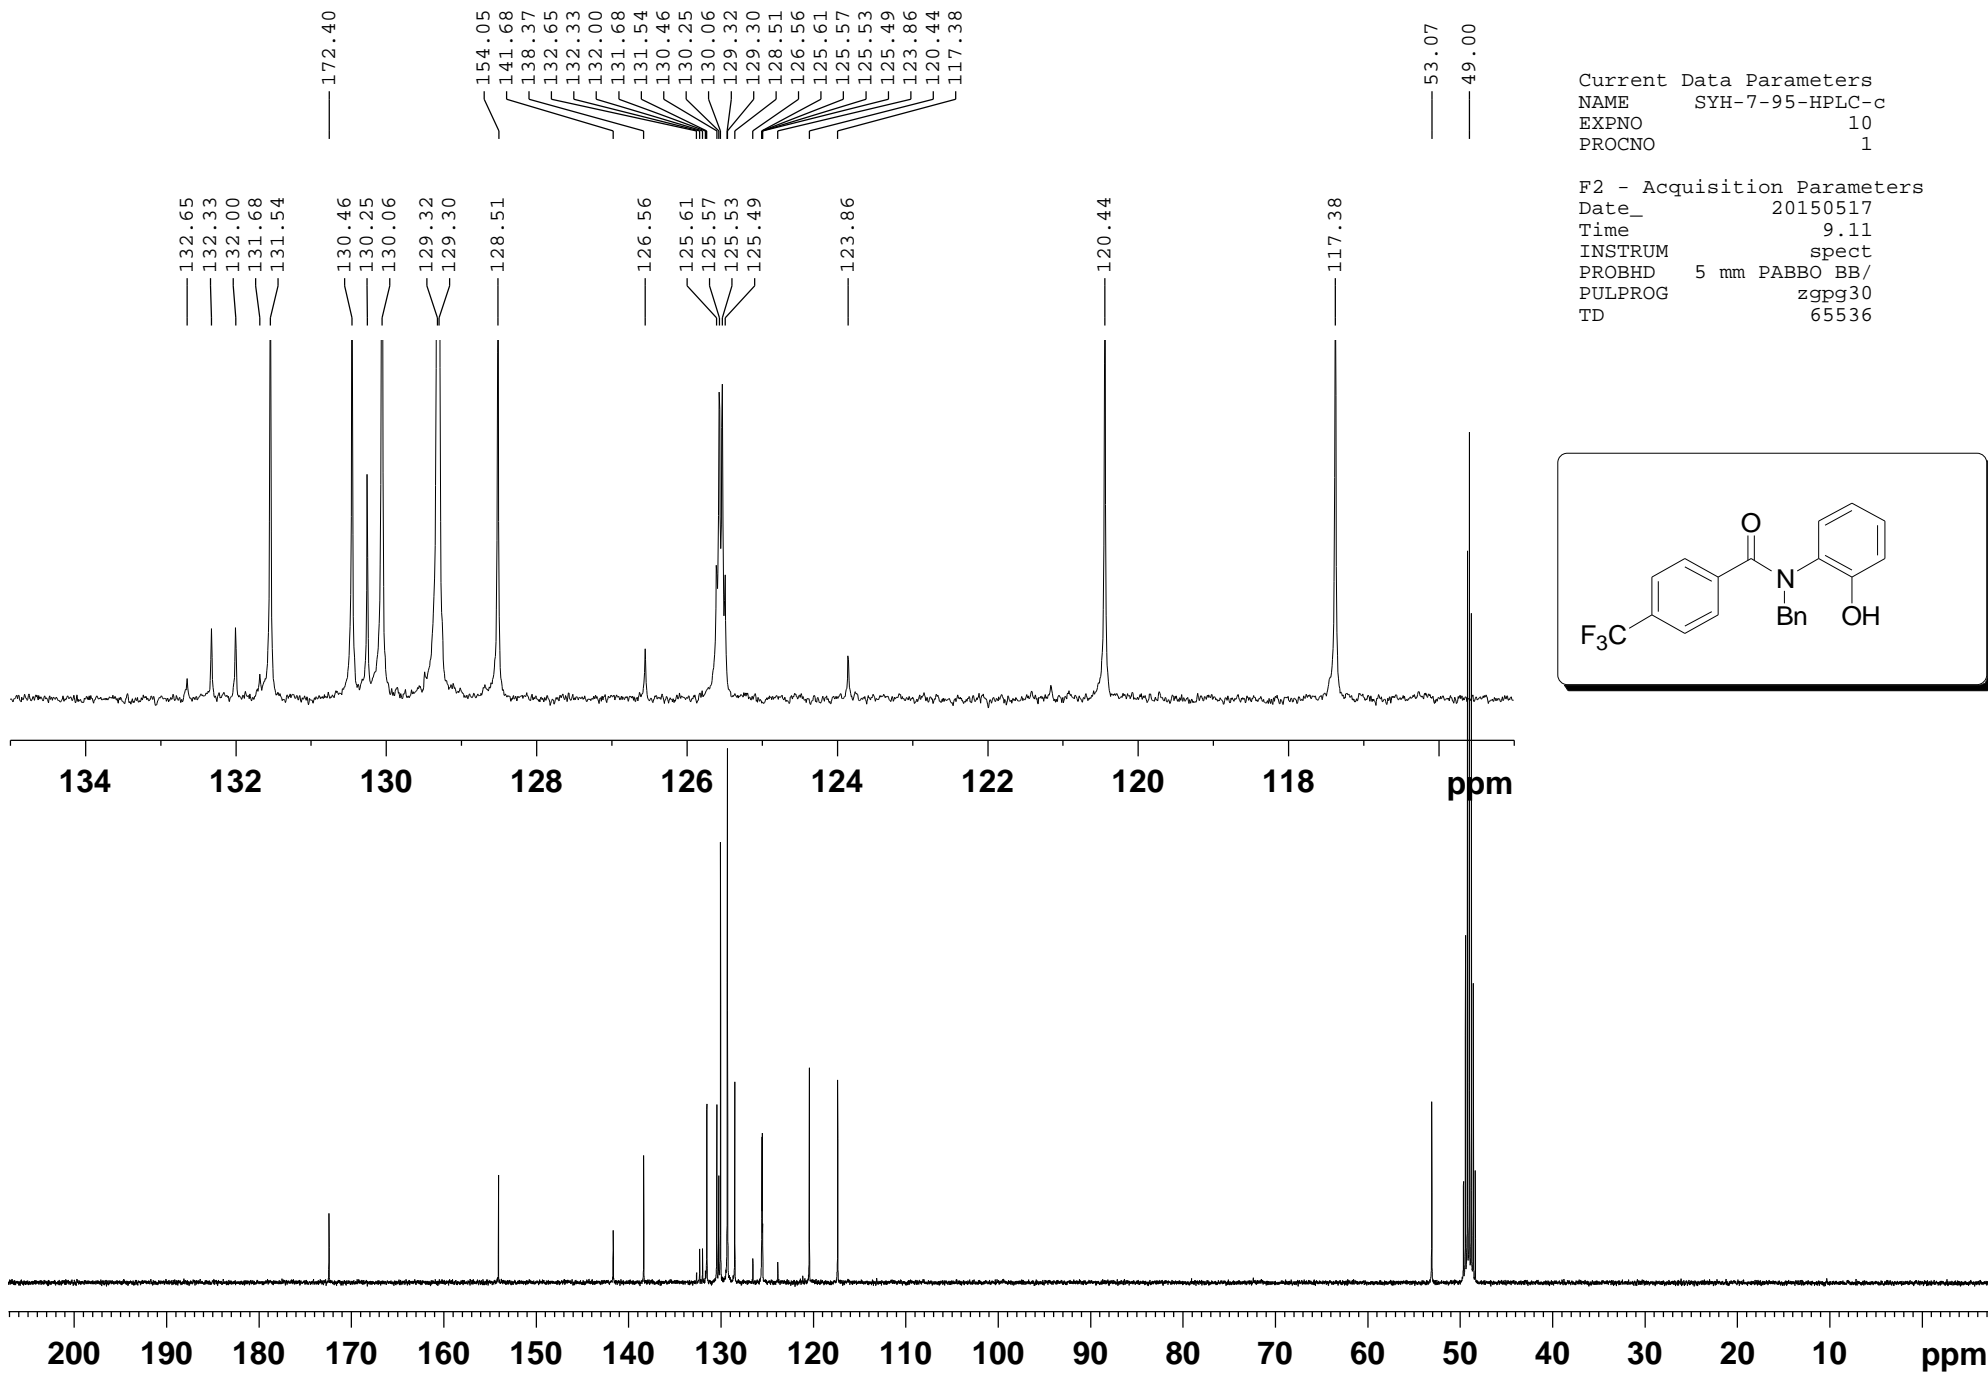



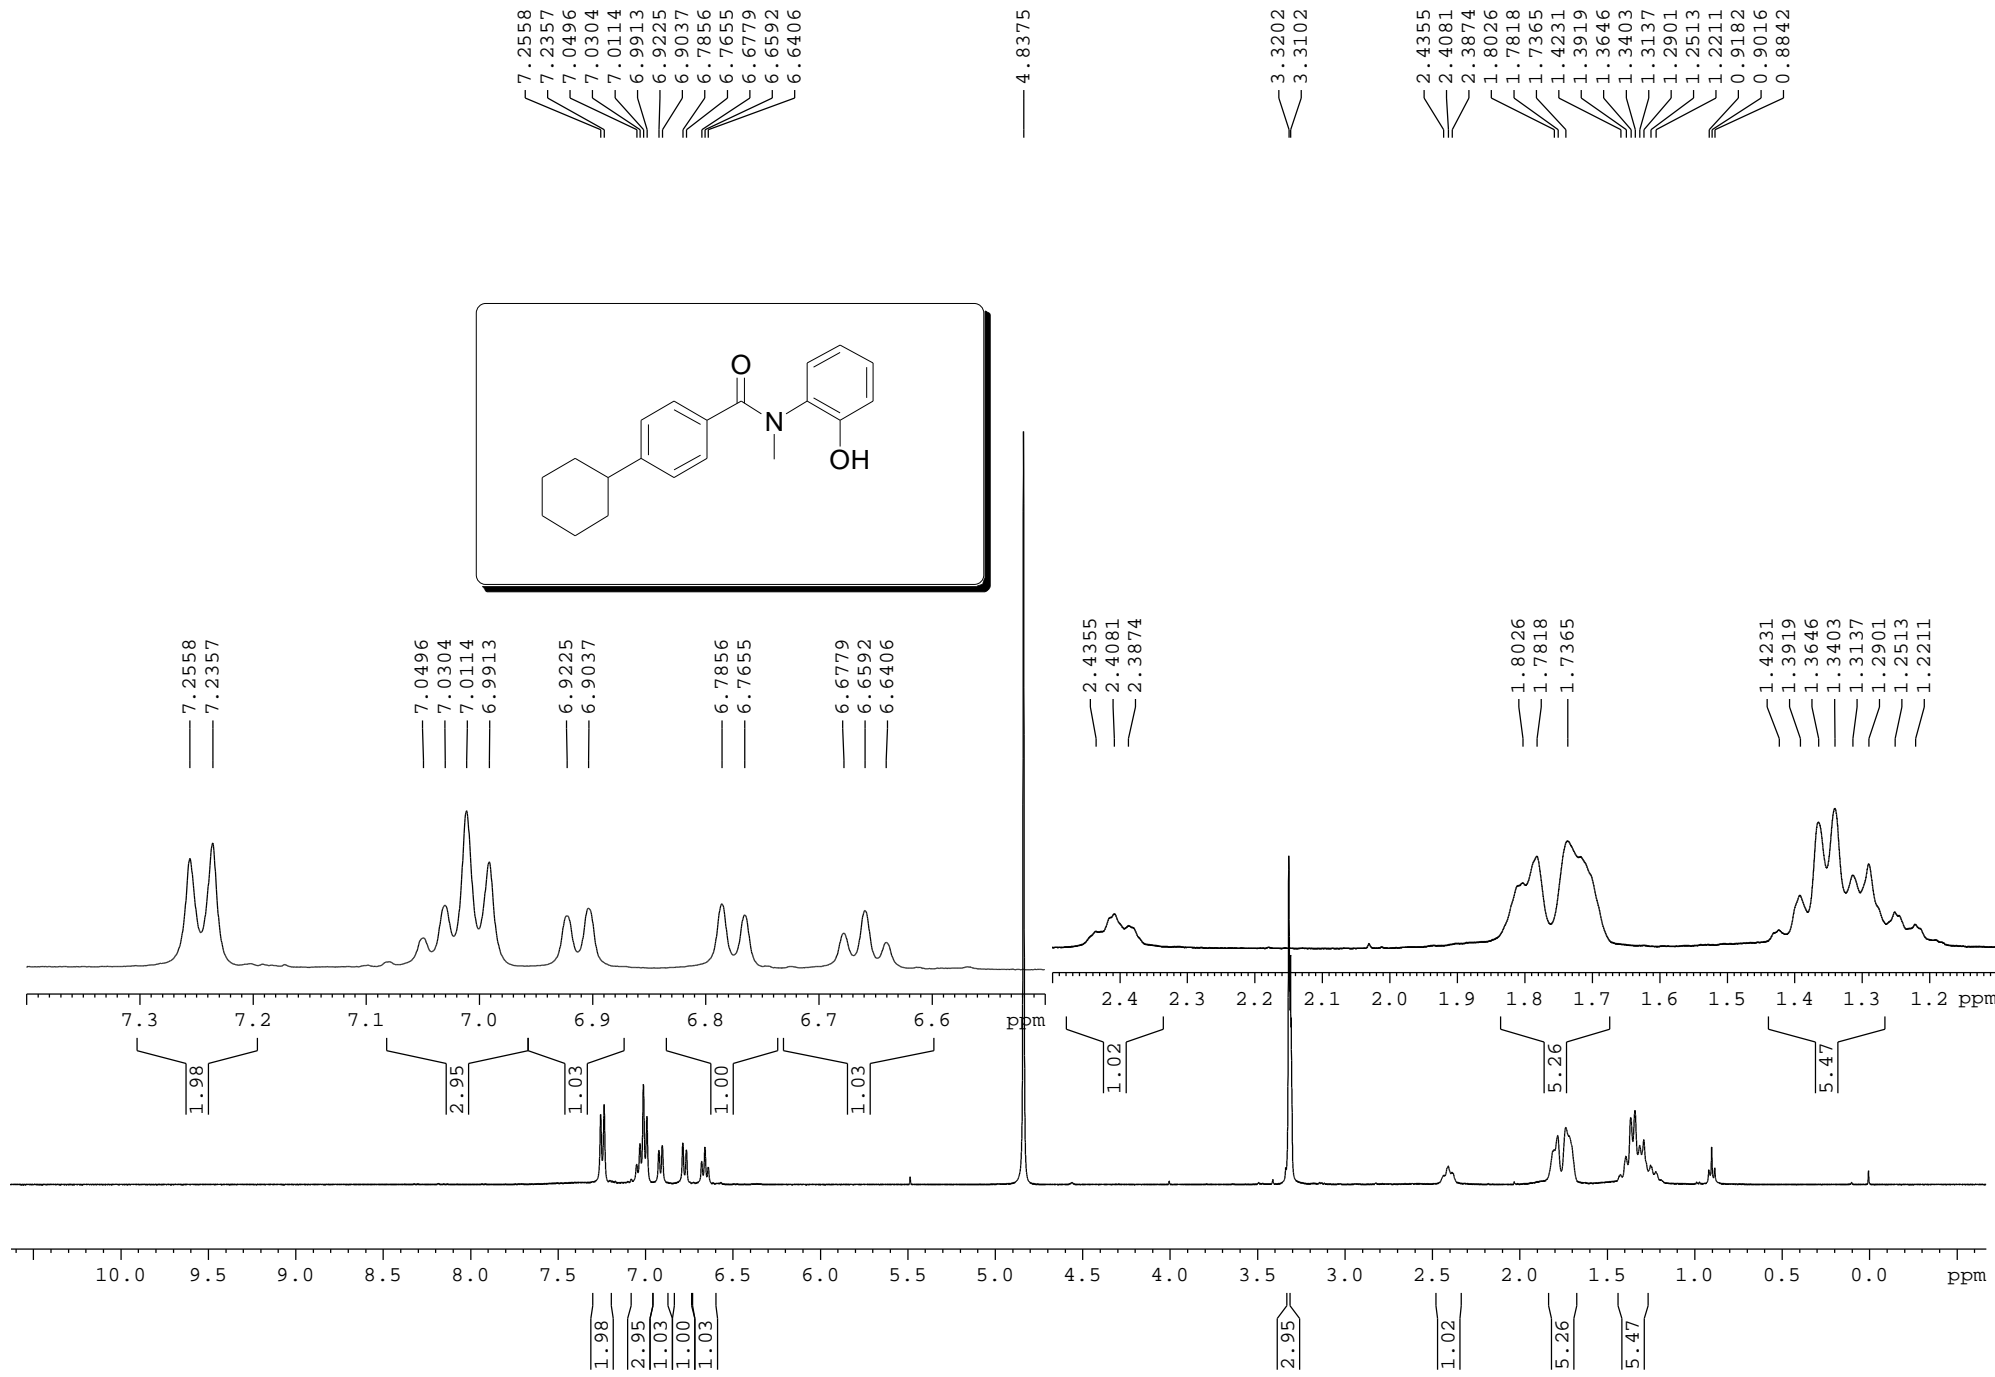

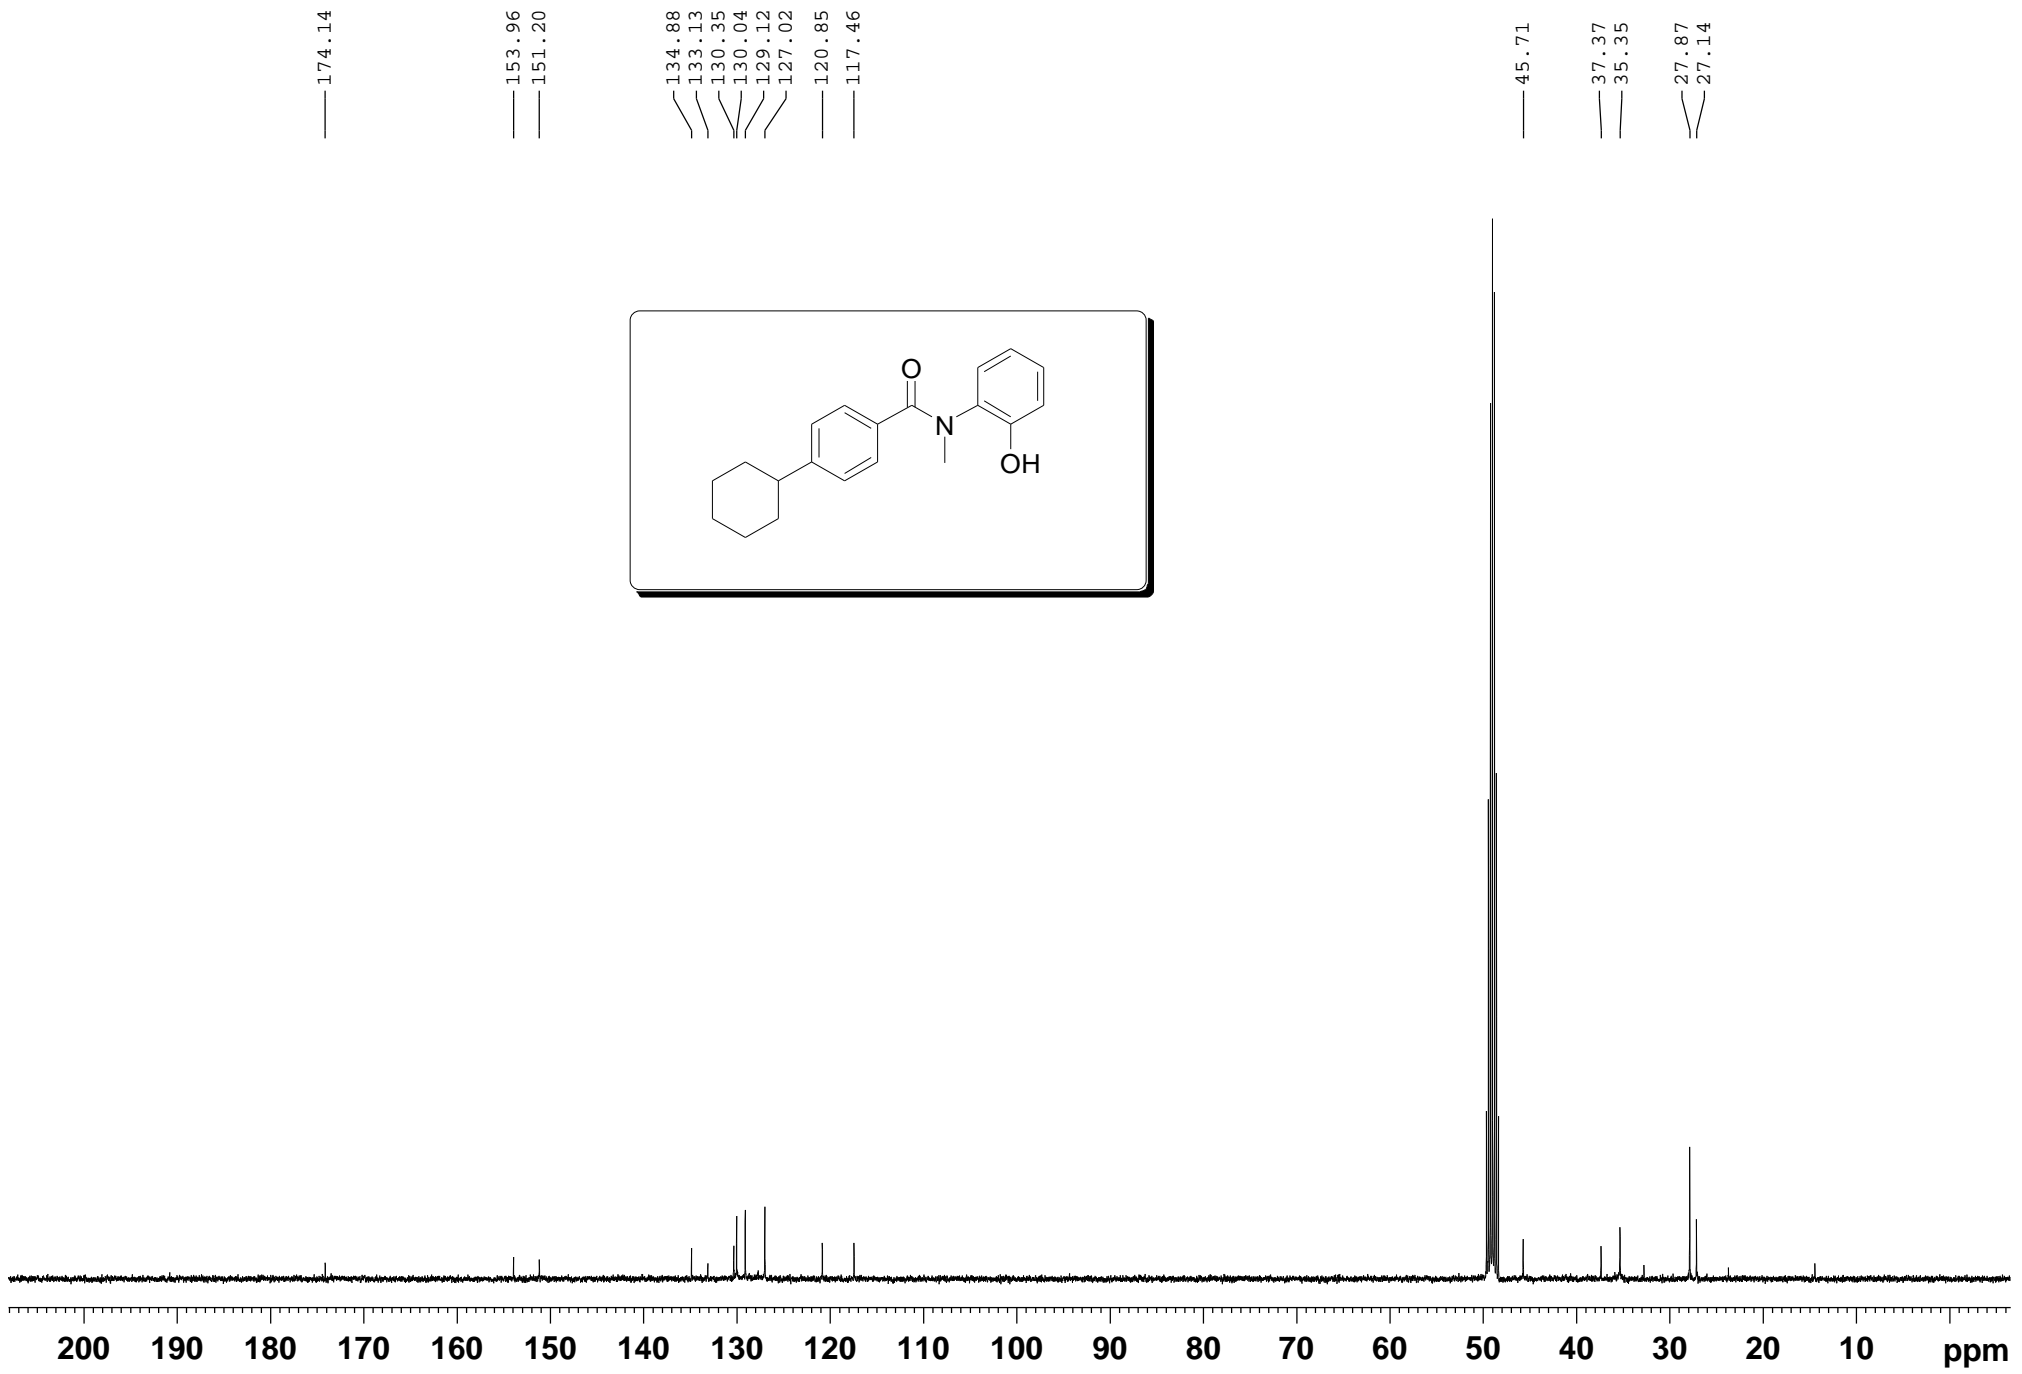

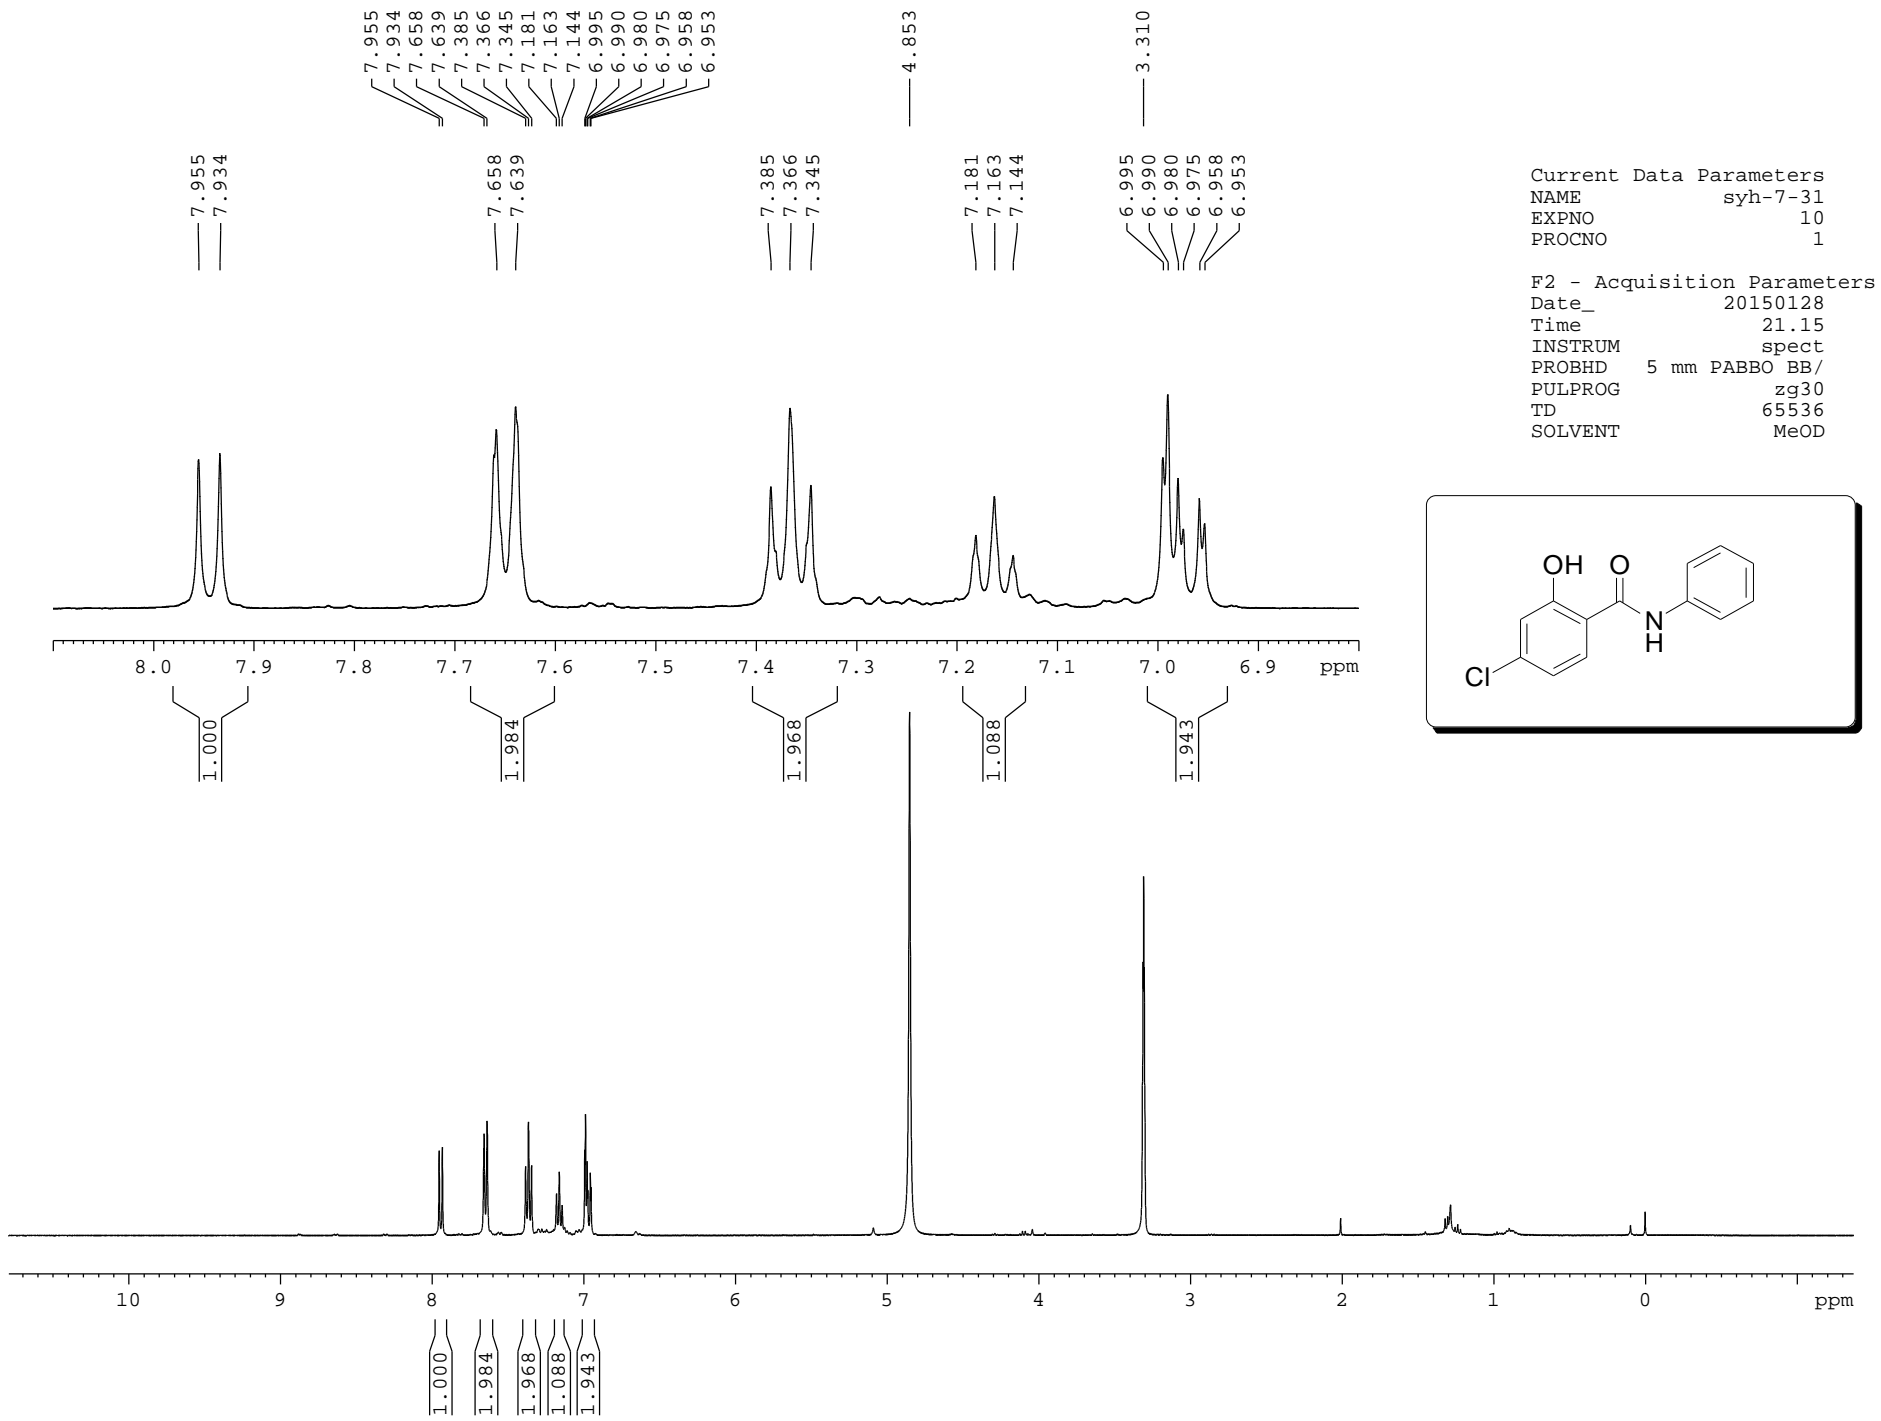

Current Data Parameters  
 NAME syh-7-31  
 EXPNO 10  
 PROCNO 1

F2 - Acquisition Parameters  
 Date\_ 20150128  
 Time 21.15  
 INSTRUM spect  
 PROBHD 5 mm PABBO BB/  
 PULPROG zg30  
 TD 65536  
 SOLVENT MeOD

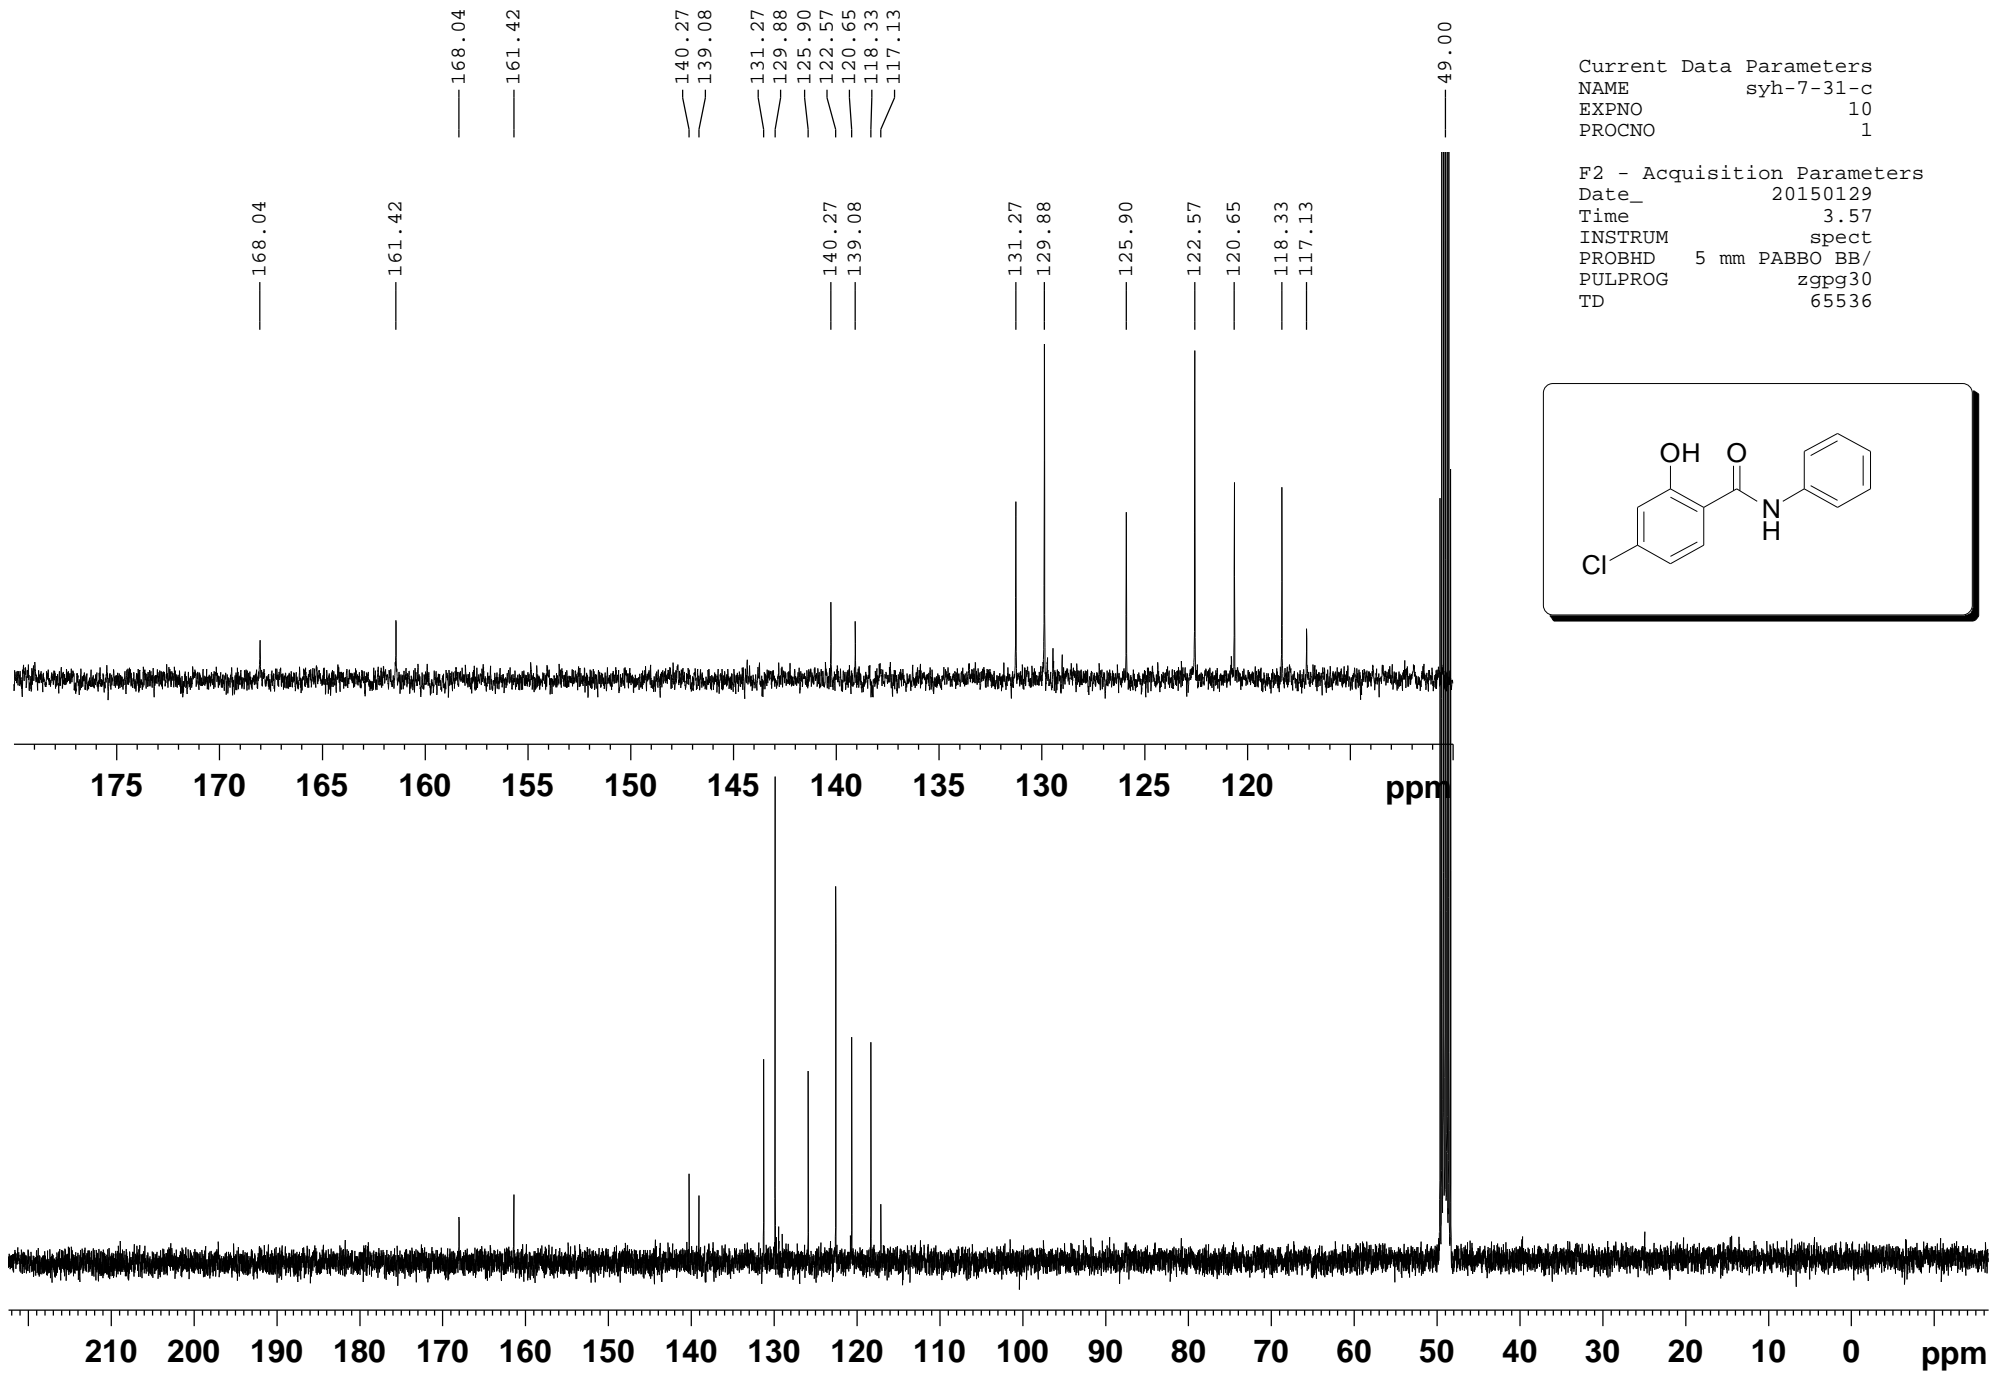

Current Data Parameters  
NAME syh-7-31-c  
EXPNO 10  
PROCNO 1

F2 - Acquisition Parameters  
Date\_ 20150129  
Time 3.57  
INSTRUM spect  
PROBHD 5 mm PABBO BB/  
PULPROG zgpg30  
TD 65536

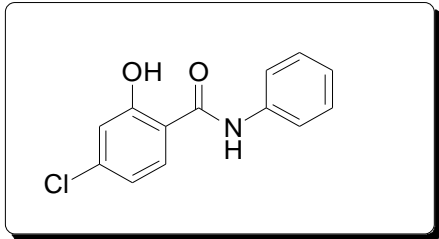

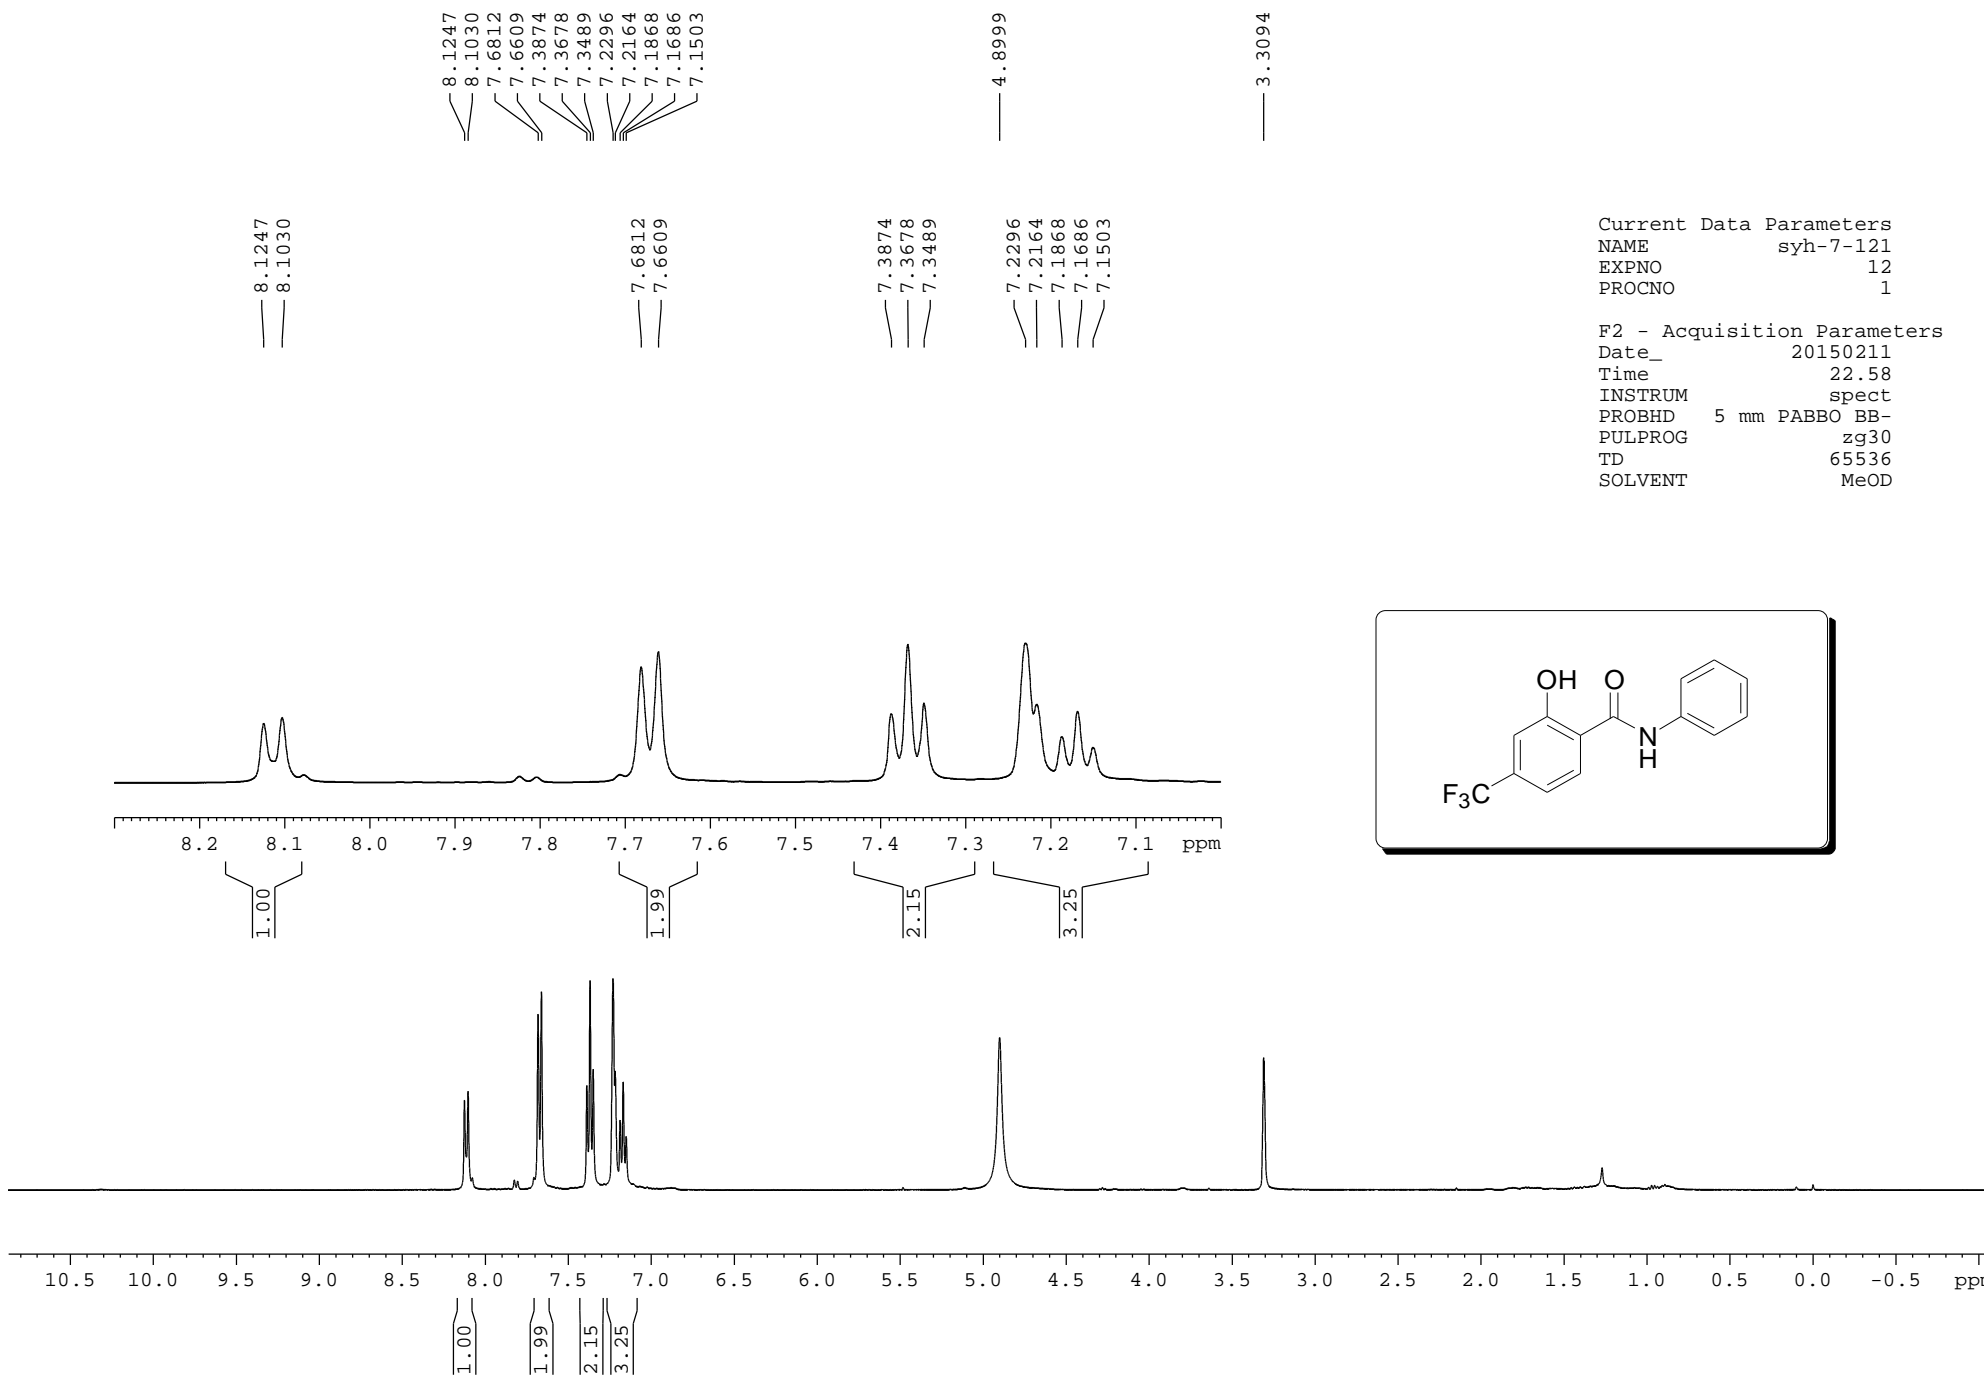

Current Data Parameters  
 NAME syh-7-121  
 EXPNO 12  
 PROCNO 1

F2 - Acquisition Parameters  
 Date\_ 20150211  
 Time 22.58  
 INSTRUM spect  
 PROBHD 5 mm PABBO BB-  
 PULPROG zg30  
 TD 65536  
 SOLVENT MeOD

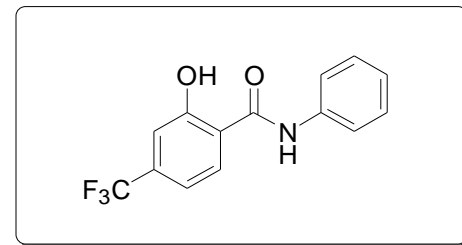

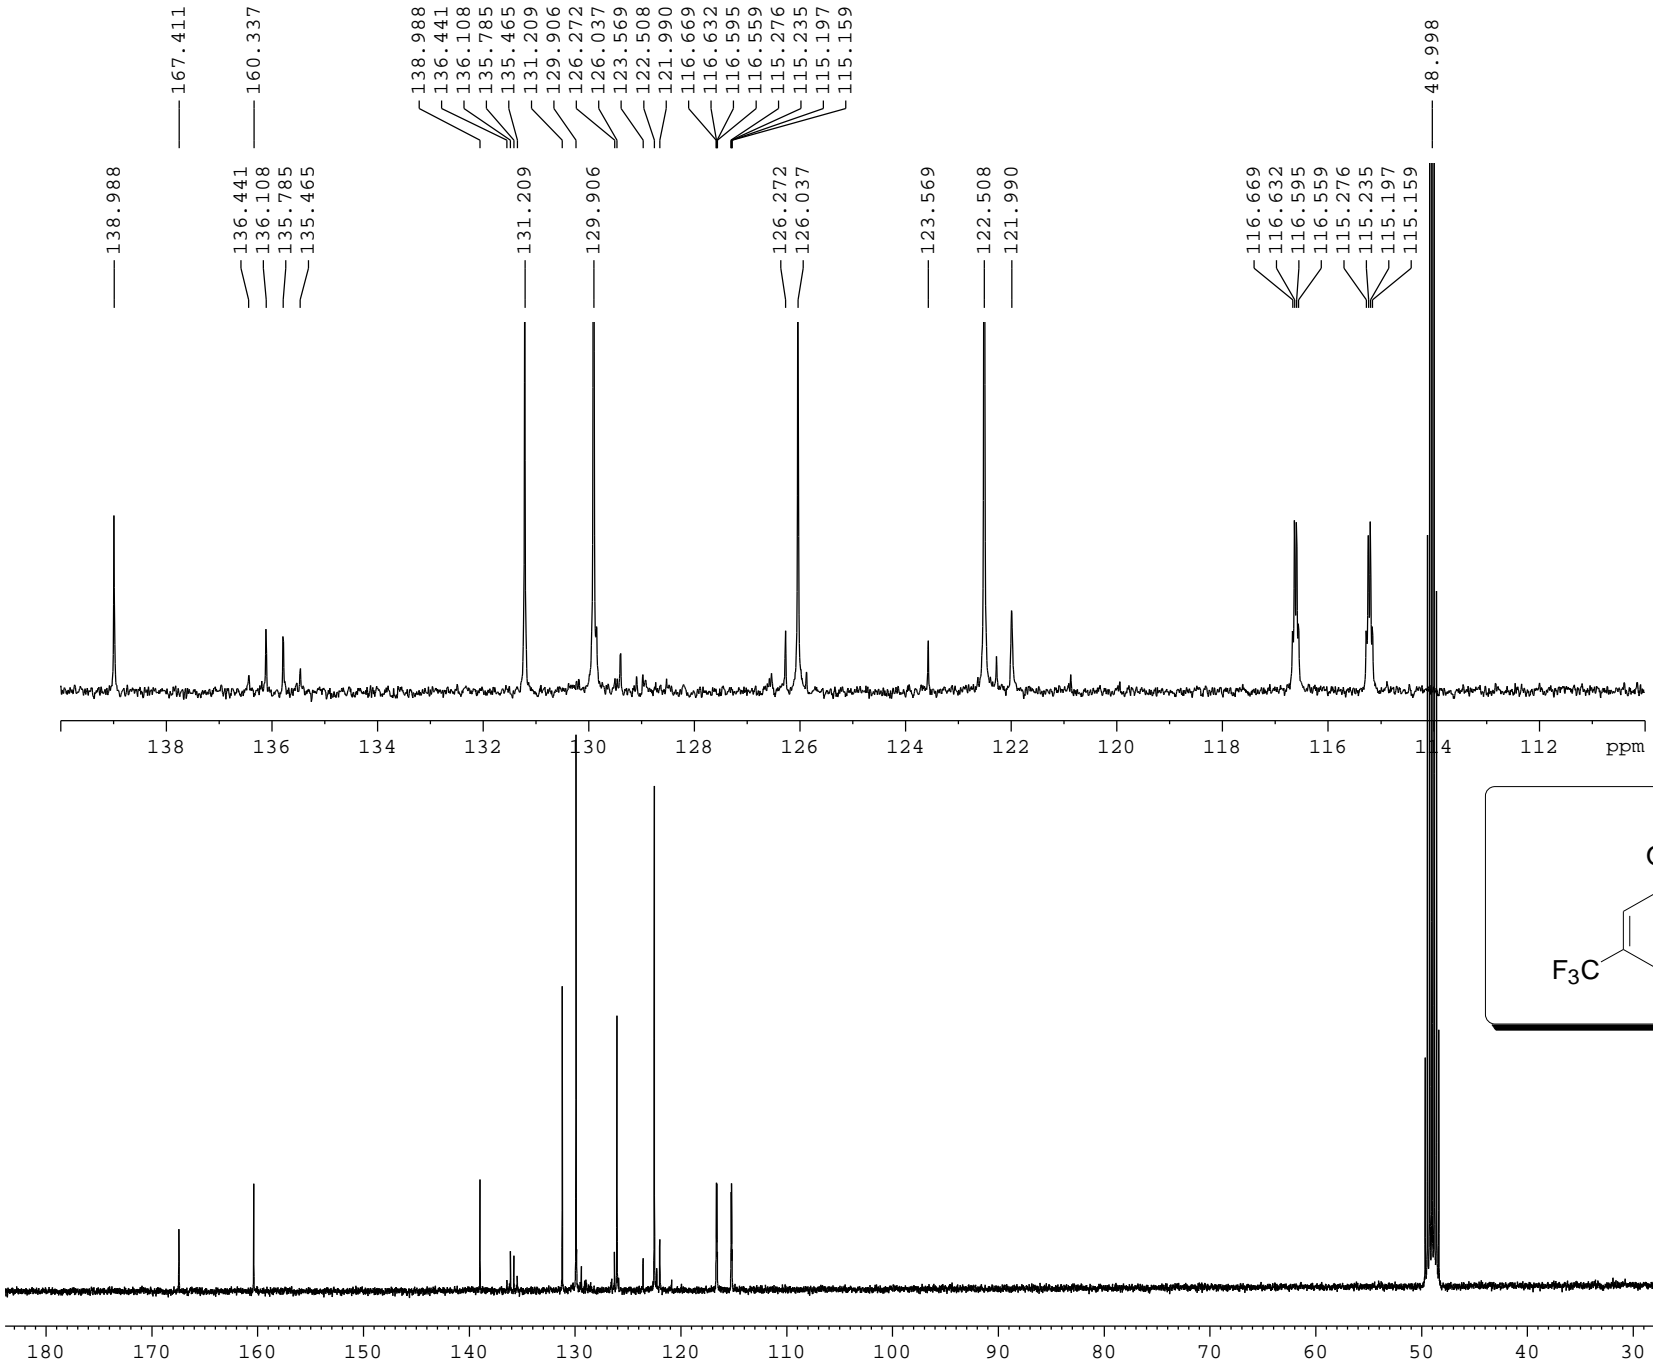

Current Data Parameters  
 NAME syh-7-121-C  
 EXPNO 10  
 PROCNO 1

F2 - Acquisition Parameters  
 Date\_ 20150214  
 Time 9.38  
 INSTRUM spect  
 PROBHD 5 mm PABBO BB-  
 PULPROG zgpg30  
 TD 65536  
 SOLVENT MeOD  
 NS 1678  
 DS 4  
 SWH 24038.461 Hz  
 FIDRES 0.366798 Hz  
 AQ 1.3631988 se  
 RG 209.25  
 DW 20.804 us  
 DE 6.50 us  
 TE 296.4 K  
 D1 2.00000000 se  
 D11 0.03000000 se  
 TD0 1

==== CHANNEL f1 =====  
 NUC1 13C  
 P1 10.59 us  
 PLW1 50.00299835 W  
 SFO1 100.6228293 MH

==== CHANNEL f2 =====  
 CPDPRG2 waltz16  
 NUC2 1H  
 PCPD2 90.00 us  
 PLW2 13.00199986 W  
 PLW12 0.35303000 W  
 PLW13 0.28595001 W  
 SFO2 400.1316005 MH

F2 - Processing parameters  
 SI 32768  
 SF 100.6126281 MH  
 WDW EM  
 SSB 0  
 LB 1.00 Hz  
 GB 0  
 PC 1.40

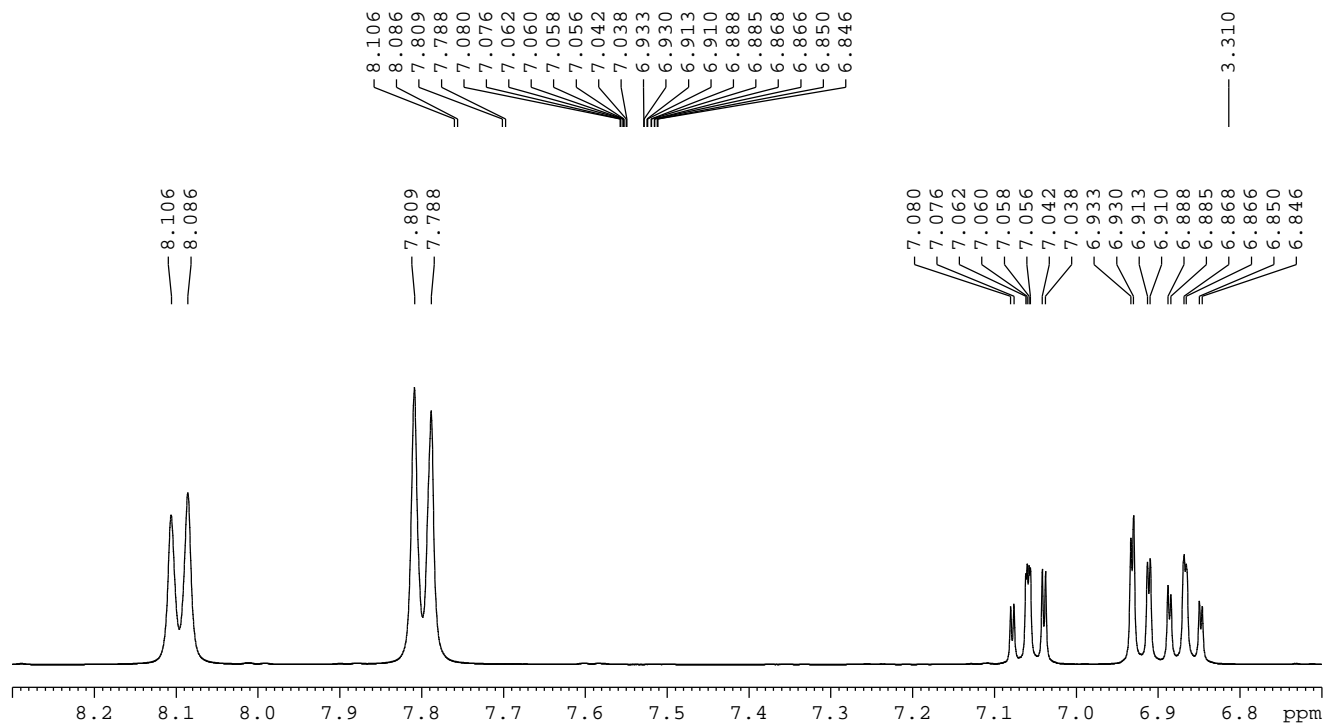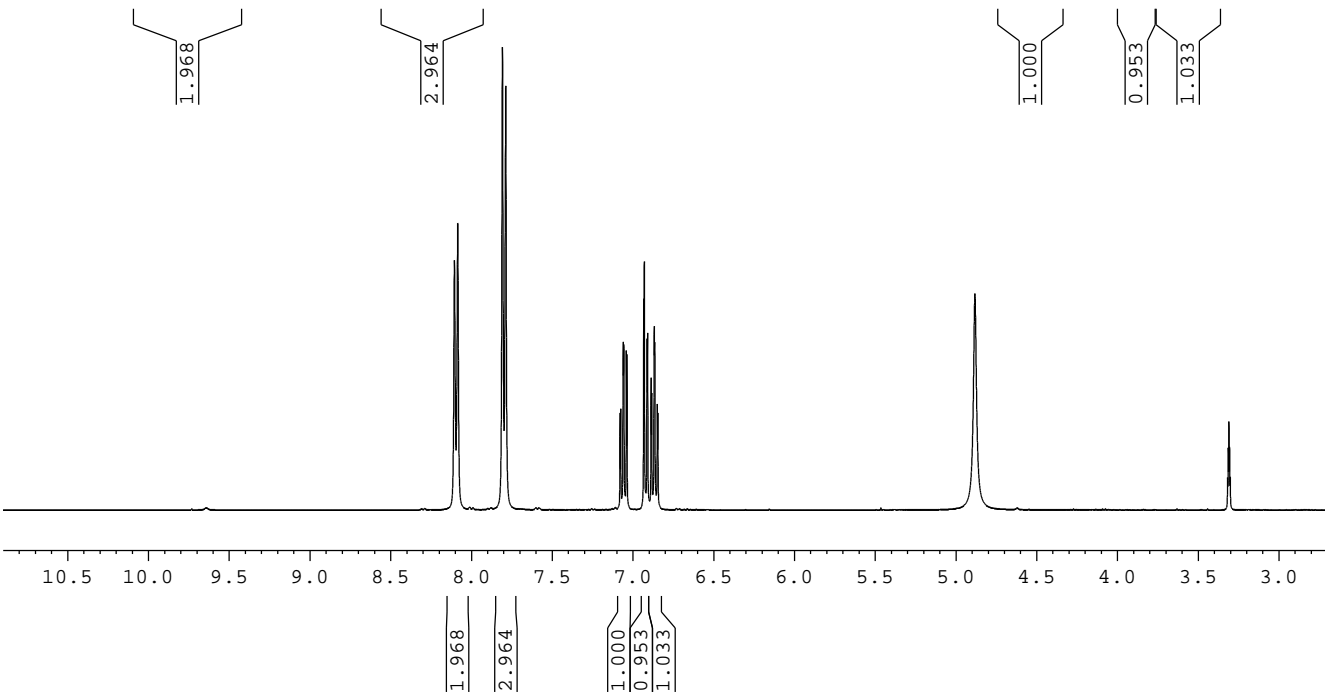

Current Data Parameters  
 NAME syh-7-107-p  
 EXPNO 10  
 PROCNO 1

F2 - Acquisition Parameters  
 Date\_ 20150312  
 Time 19.25  
 INSTRUM spect  
 PROBHD 5 mm PABBO BB/  
 PULPROG zg30  
 TD 65536  
 SOLVENT MeOD

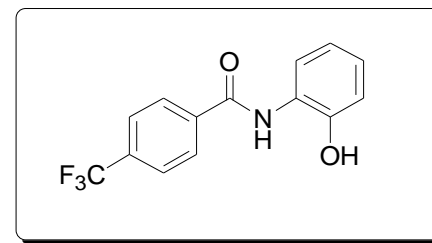

Current Data Parameters  
NAME syh-7-107-p-c  
EXPNO 10  
PROCNO 1

F2 - Acquisition Parameters  
Date\_ 20150313  
Time 2.01  
INSTRUM spect  
PROBHD 5 mm PABBO BB/  
PULPROG zgpg30  
TD 65536  
SOLVENT MeOD  
NS 1024  
DS 4

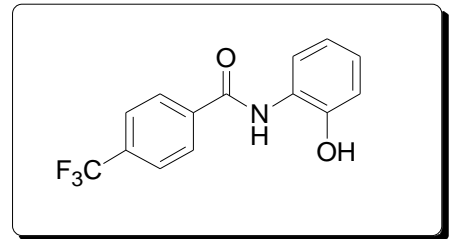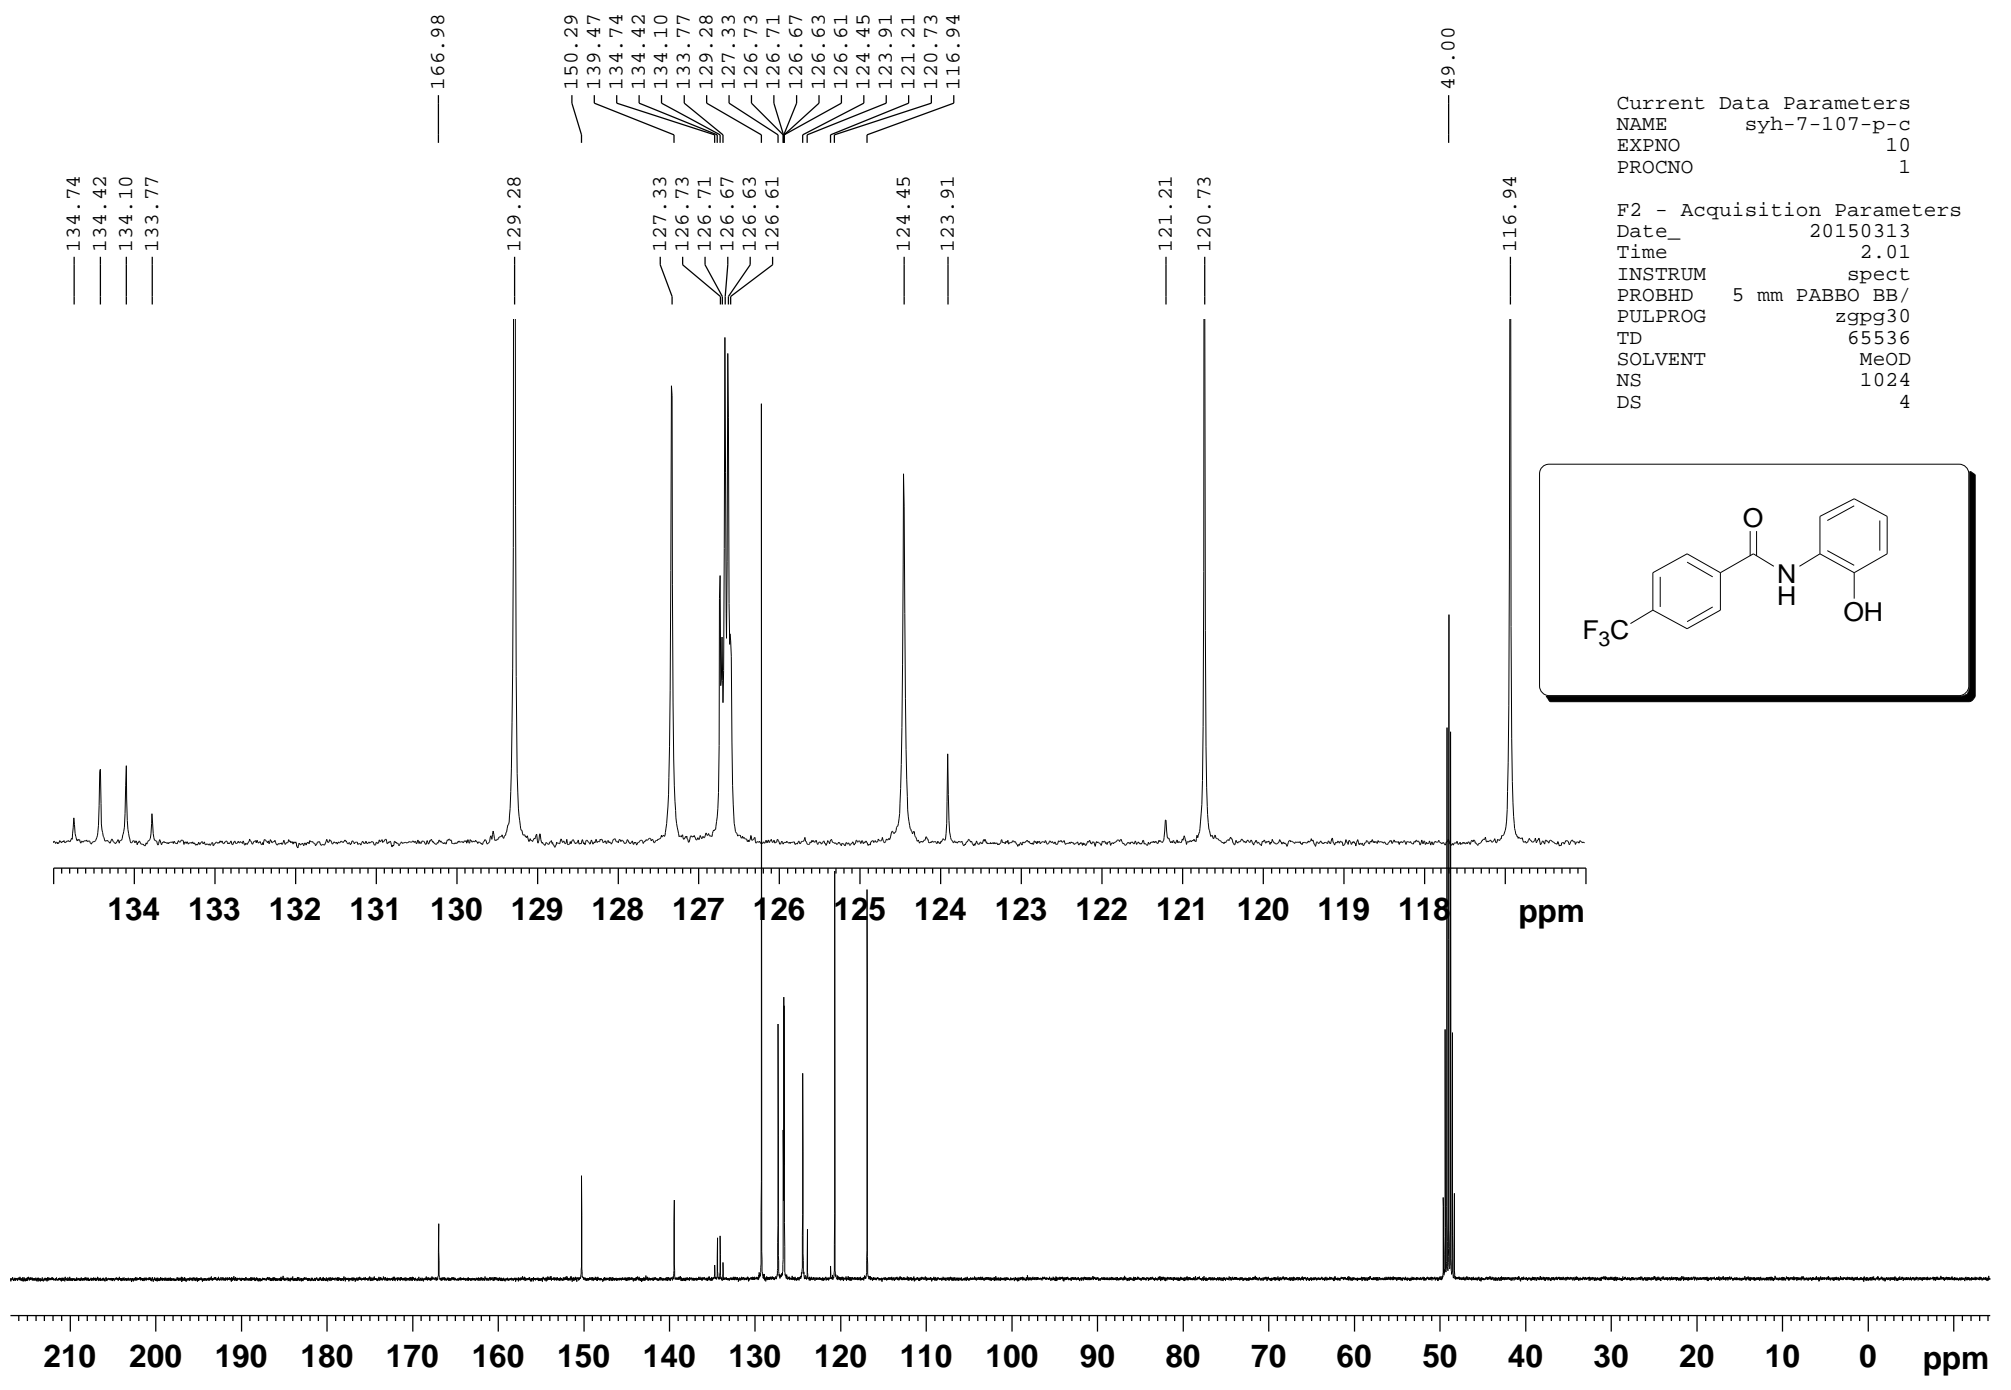



7.260  
7.176  
7.121  
7.053  
6.782  
6.598  
6.581

3.837  
3.487

1.365

Current Data Parameters  
NAME syh-6-159-p  
EXPNO 10  
PROCNO 1

F2 - Acquisition Parameters  
Date\_ 20150526  
Time 21.50  
INSTRUM spect  
PROBHD 5 mm PABBO BB/  
PULPROG zg30  
TD 65536  
SOLVENT CDCl3

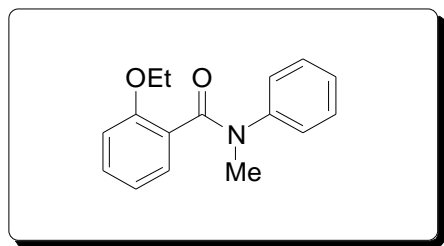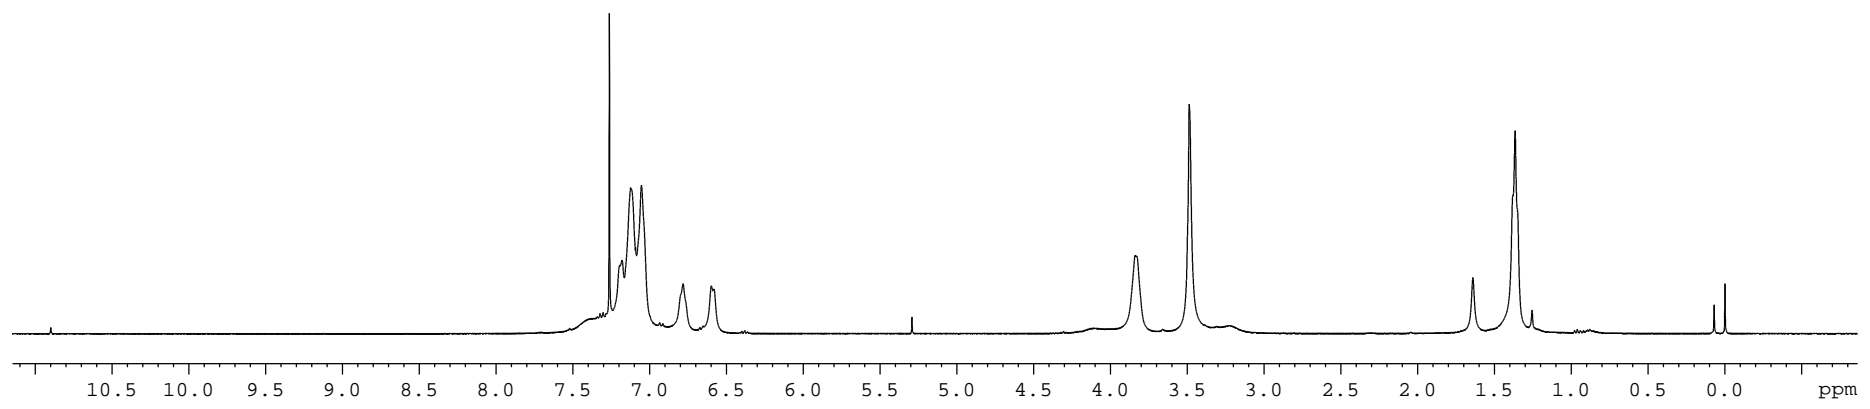

7.009  
1.000  
0.966

1.980  
3.052

3.261

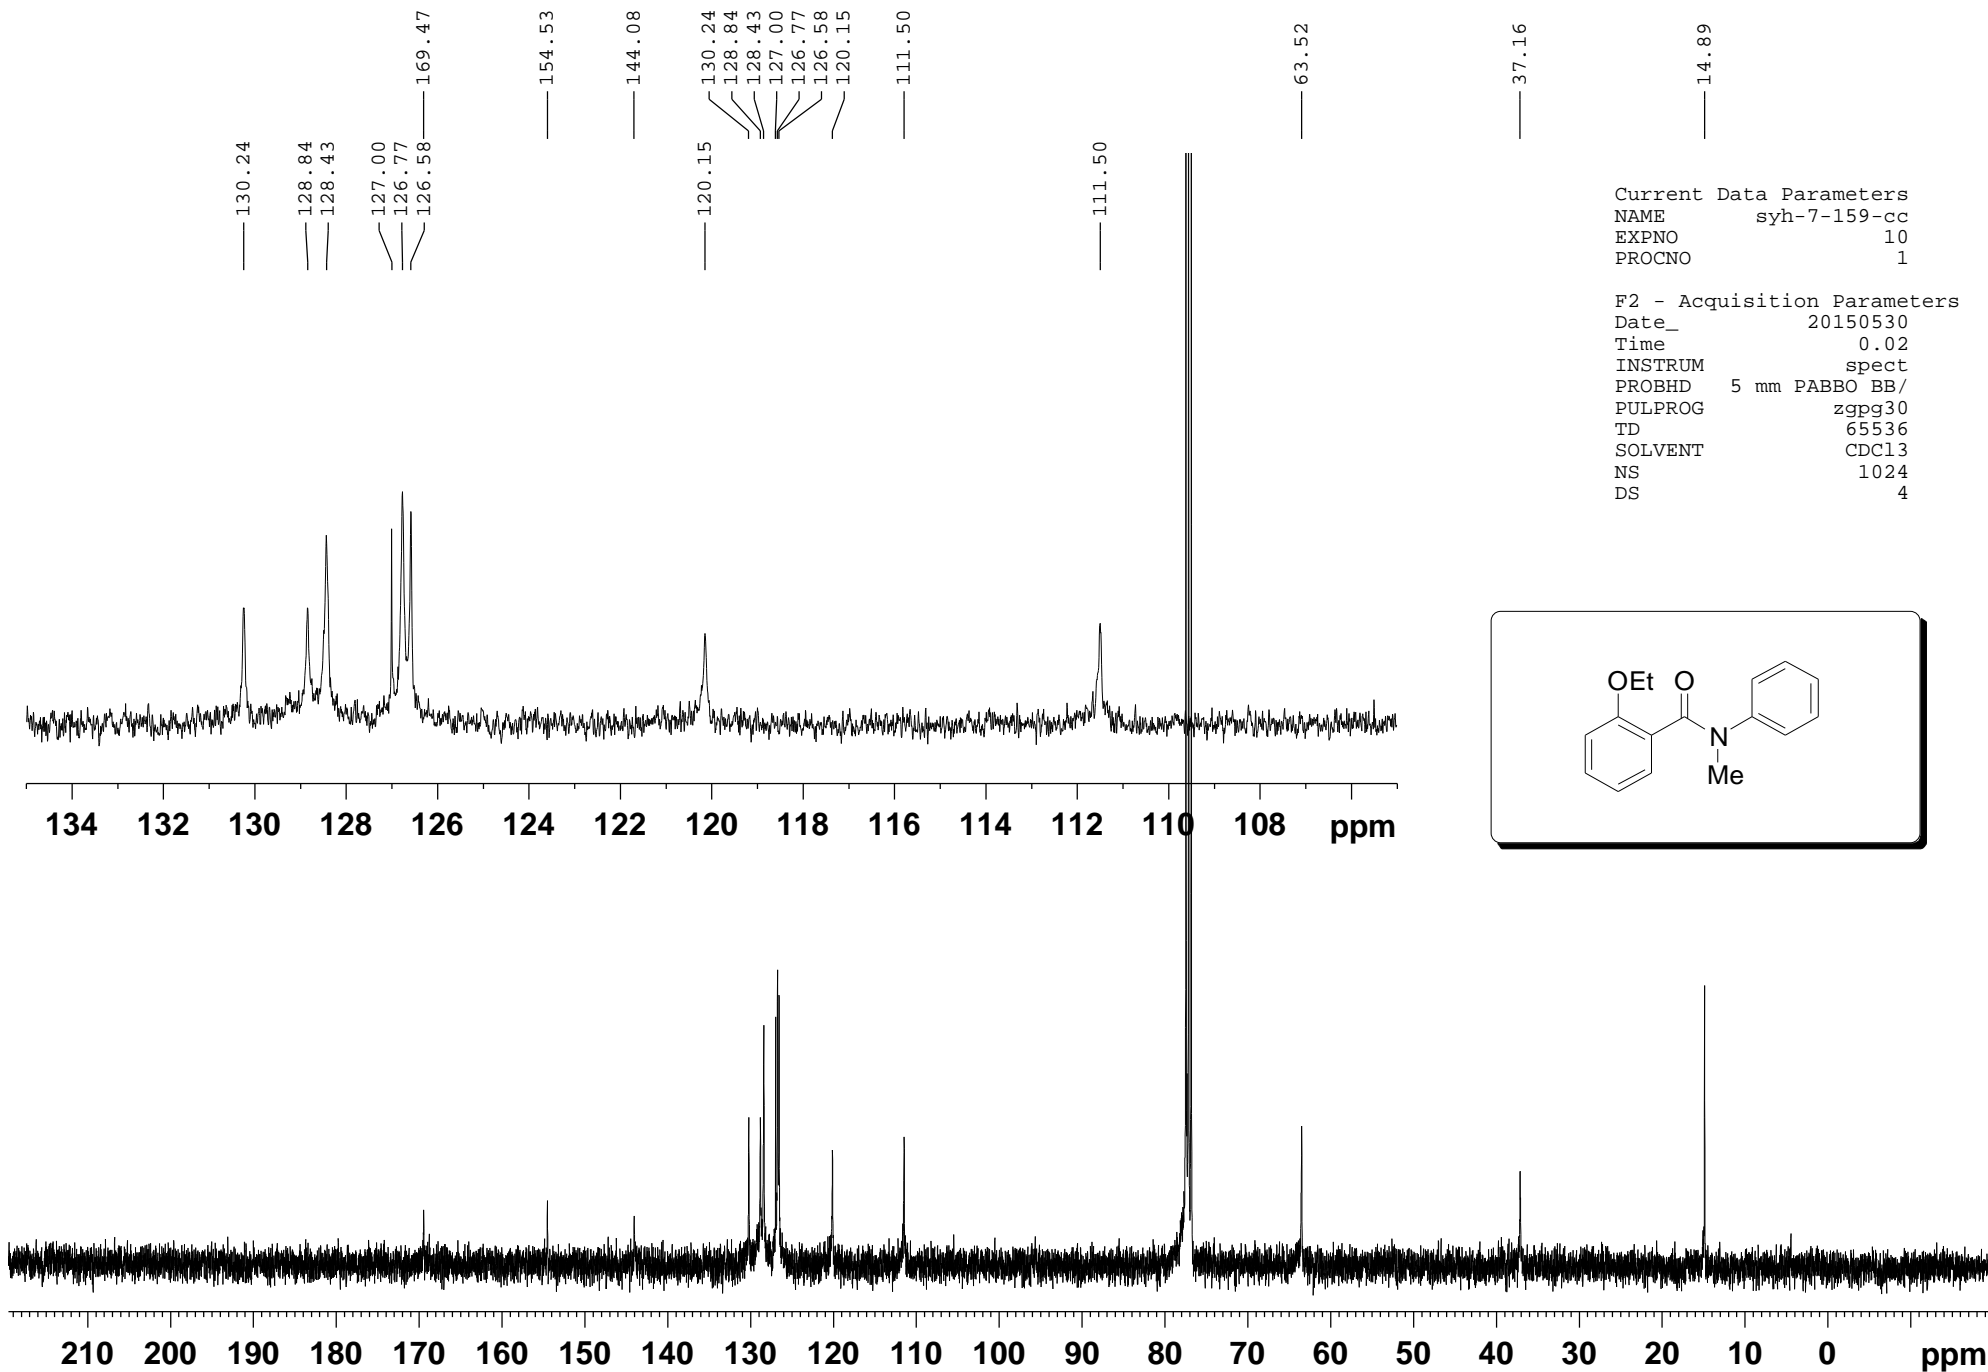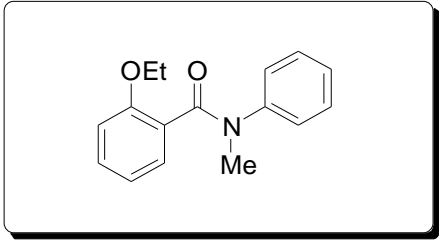

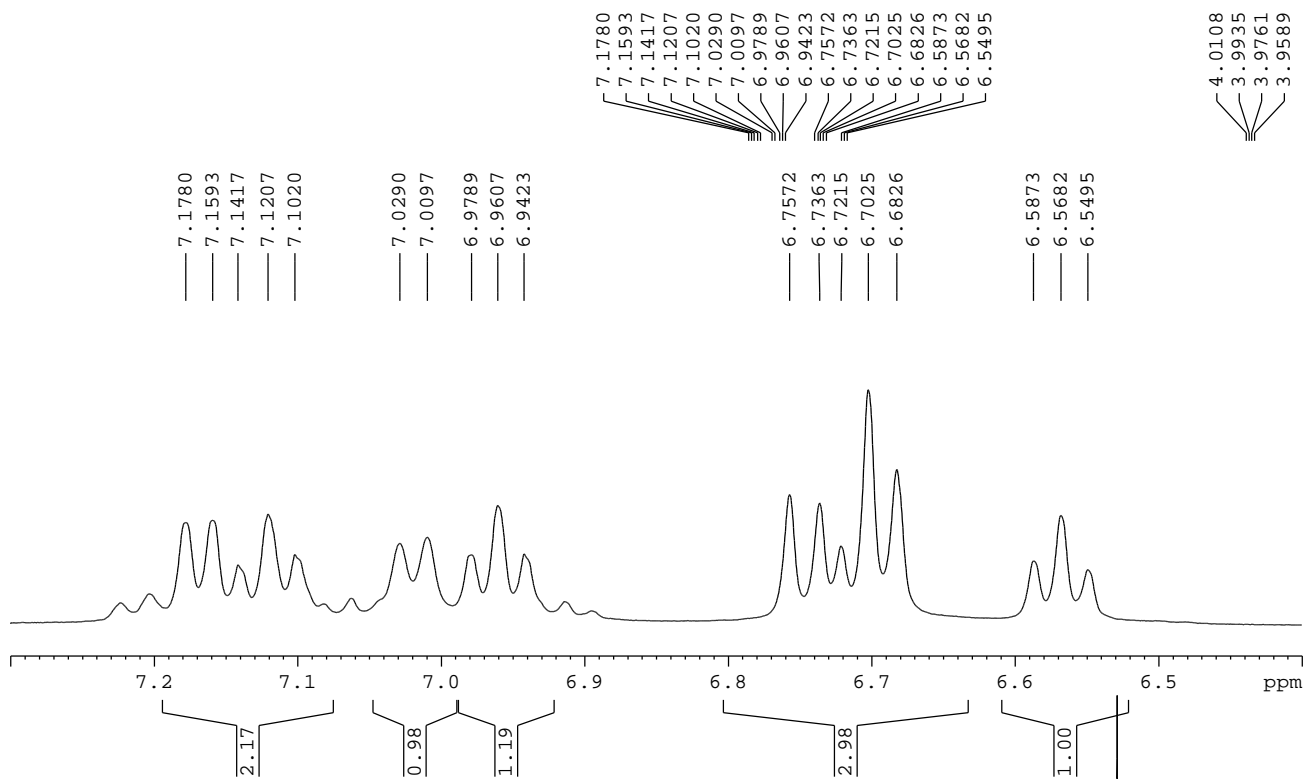

Current Data Parameters  
 NAME syh-7-205-hplc  
 EXPNO 10  
 PROCNO 1

F2 - Acquisition Parameters  
 Date\_ 20150523  
 Time 21.08  
 INSTRUM spect  
 PROBHD 5 mm PABBO BB-  
 PULPROG zg30  
 TD 65536  
 SOLVENT MeOD

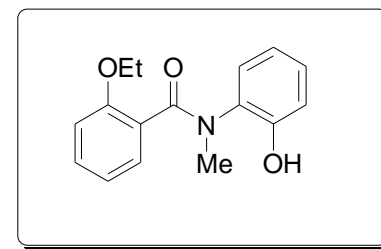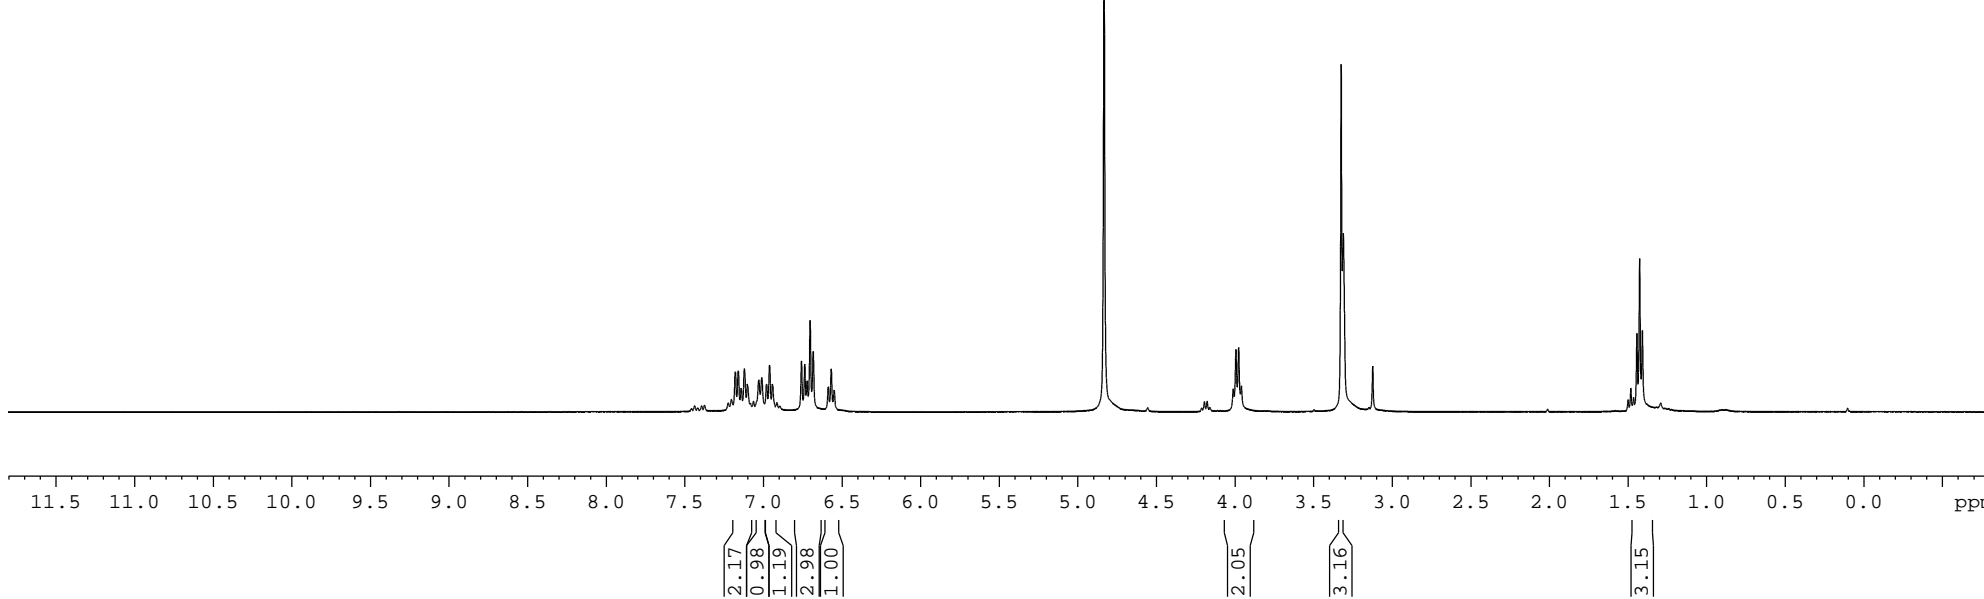

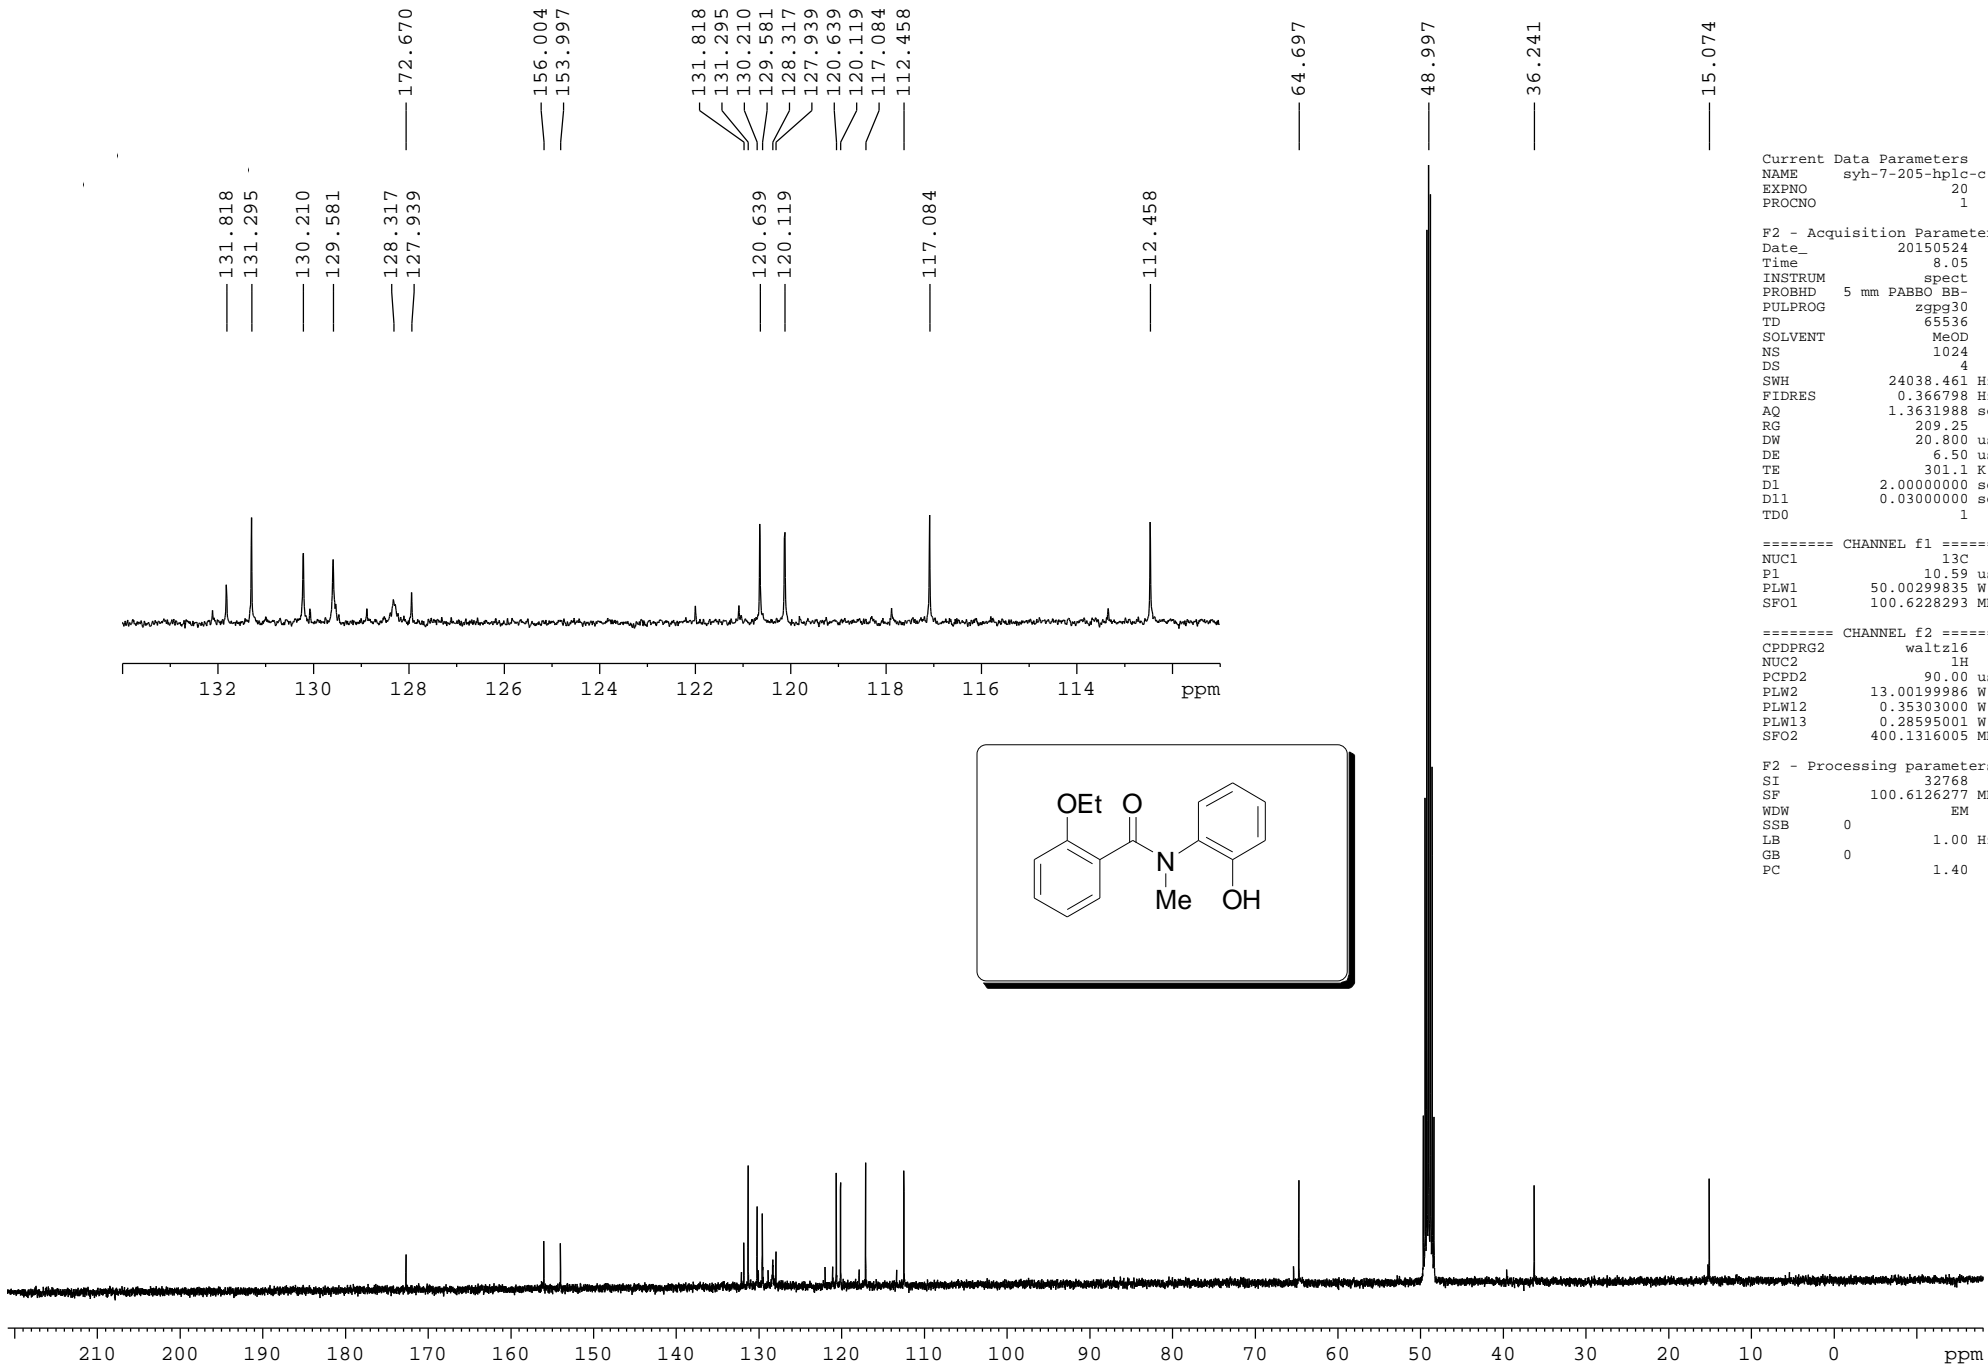

Current Data Parameters  
 NAME syh-7-205-hplc-c  
 EXPNO 20  
 PROCNO 1

F2 - Acquisition Parameters  
 Date\_ 20150524  
 Time 8.05  
 INSTRUM spect  
 PROBHD 5 mm PABBO BB-  
 PULPROG zgpg30  
 TD 65536  
 SOLVENT MeOD  
 NS 1024  
 DS 4  
 SWH 24038.461 Hz  
 FIDRES 0.366798 Hz  
 AQ 1.3631988 sec  
 RG 209.25  
 DW 20.800 usec  
 DE 6.50 usec  
 TE 301.1 K  
 D1 2.00000000 sec  
 D11 0.03000000 sec  
 TD0 1

==== CHANNEL f1 =====  
 NUC1 13C  
 P1 10.59 usec  
 PLW1 50.00299835 W  
 SFO1 100.6228293 MHz

==== CHANNEL f2 =====  
 CPDPRG2 waltz16  
 NUC2 1H  
 PCPD2 90.00 usec  
 PLW2 13.00199986 W  
 PLW12 0.35303000 W  
 PLW13 0.28595001 W  
 SFO2 400.1316005 MHz

F2 - Processing parameters  
 SI 32768  
 SF 100.6126277 MHz  
 HDW EM  
 SSB 0  
 LB 1.00 Hz  
 GB 0  
 PC 1.40

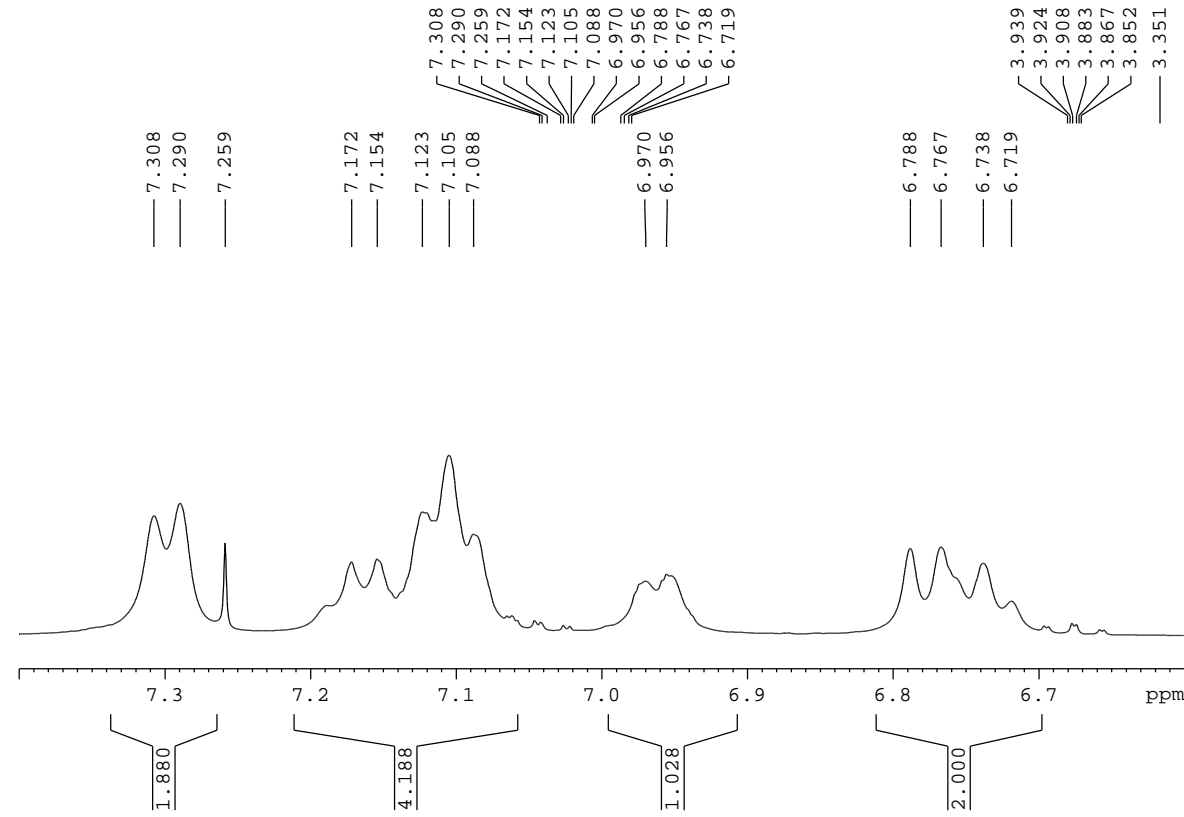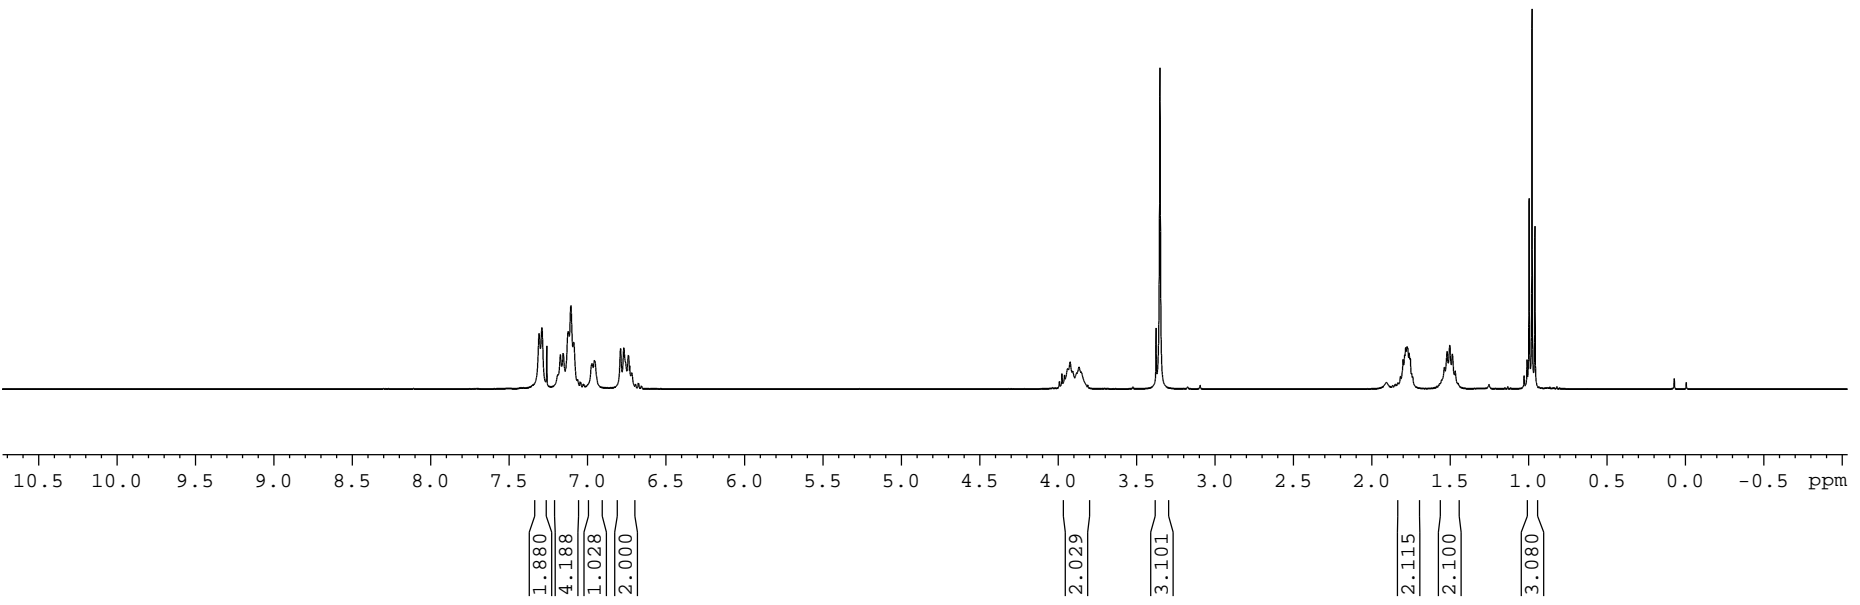

1.817  
1.801  
1.791  
1.784  
1.775  
1.762  
1.755  
1.746  
1.739  
1.538  
1.520  
1.503  
1.486  
1.468  
0.997  
0.979  
0.960

Current Data Parameters  
 NAME syh-6-167-p  
 EXPNO 10  
 PROCNO 1

F2 - Acquisition Parameters  
 Date\_ 20150526  
 Time 21.54  
 INSTRUM spect  
 PROBHD 5 mm PABBO BB/  
 PULPROG zg30  
 TD 65536  
 SOLVENT CDC13

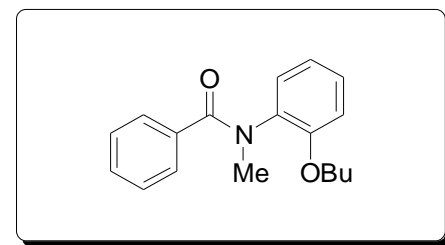

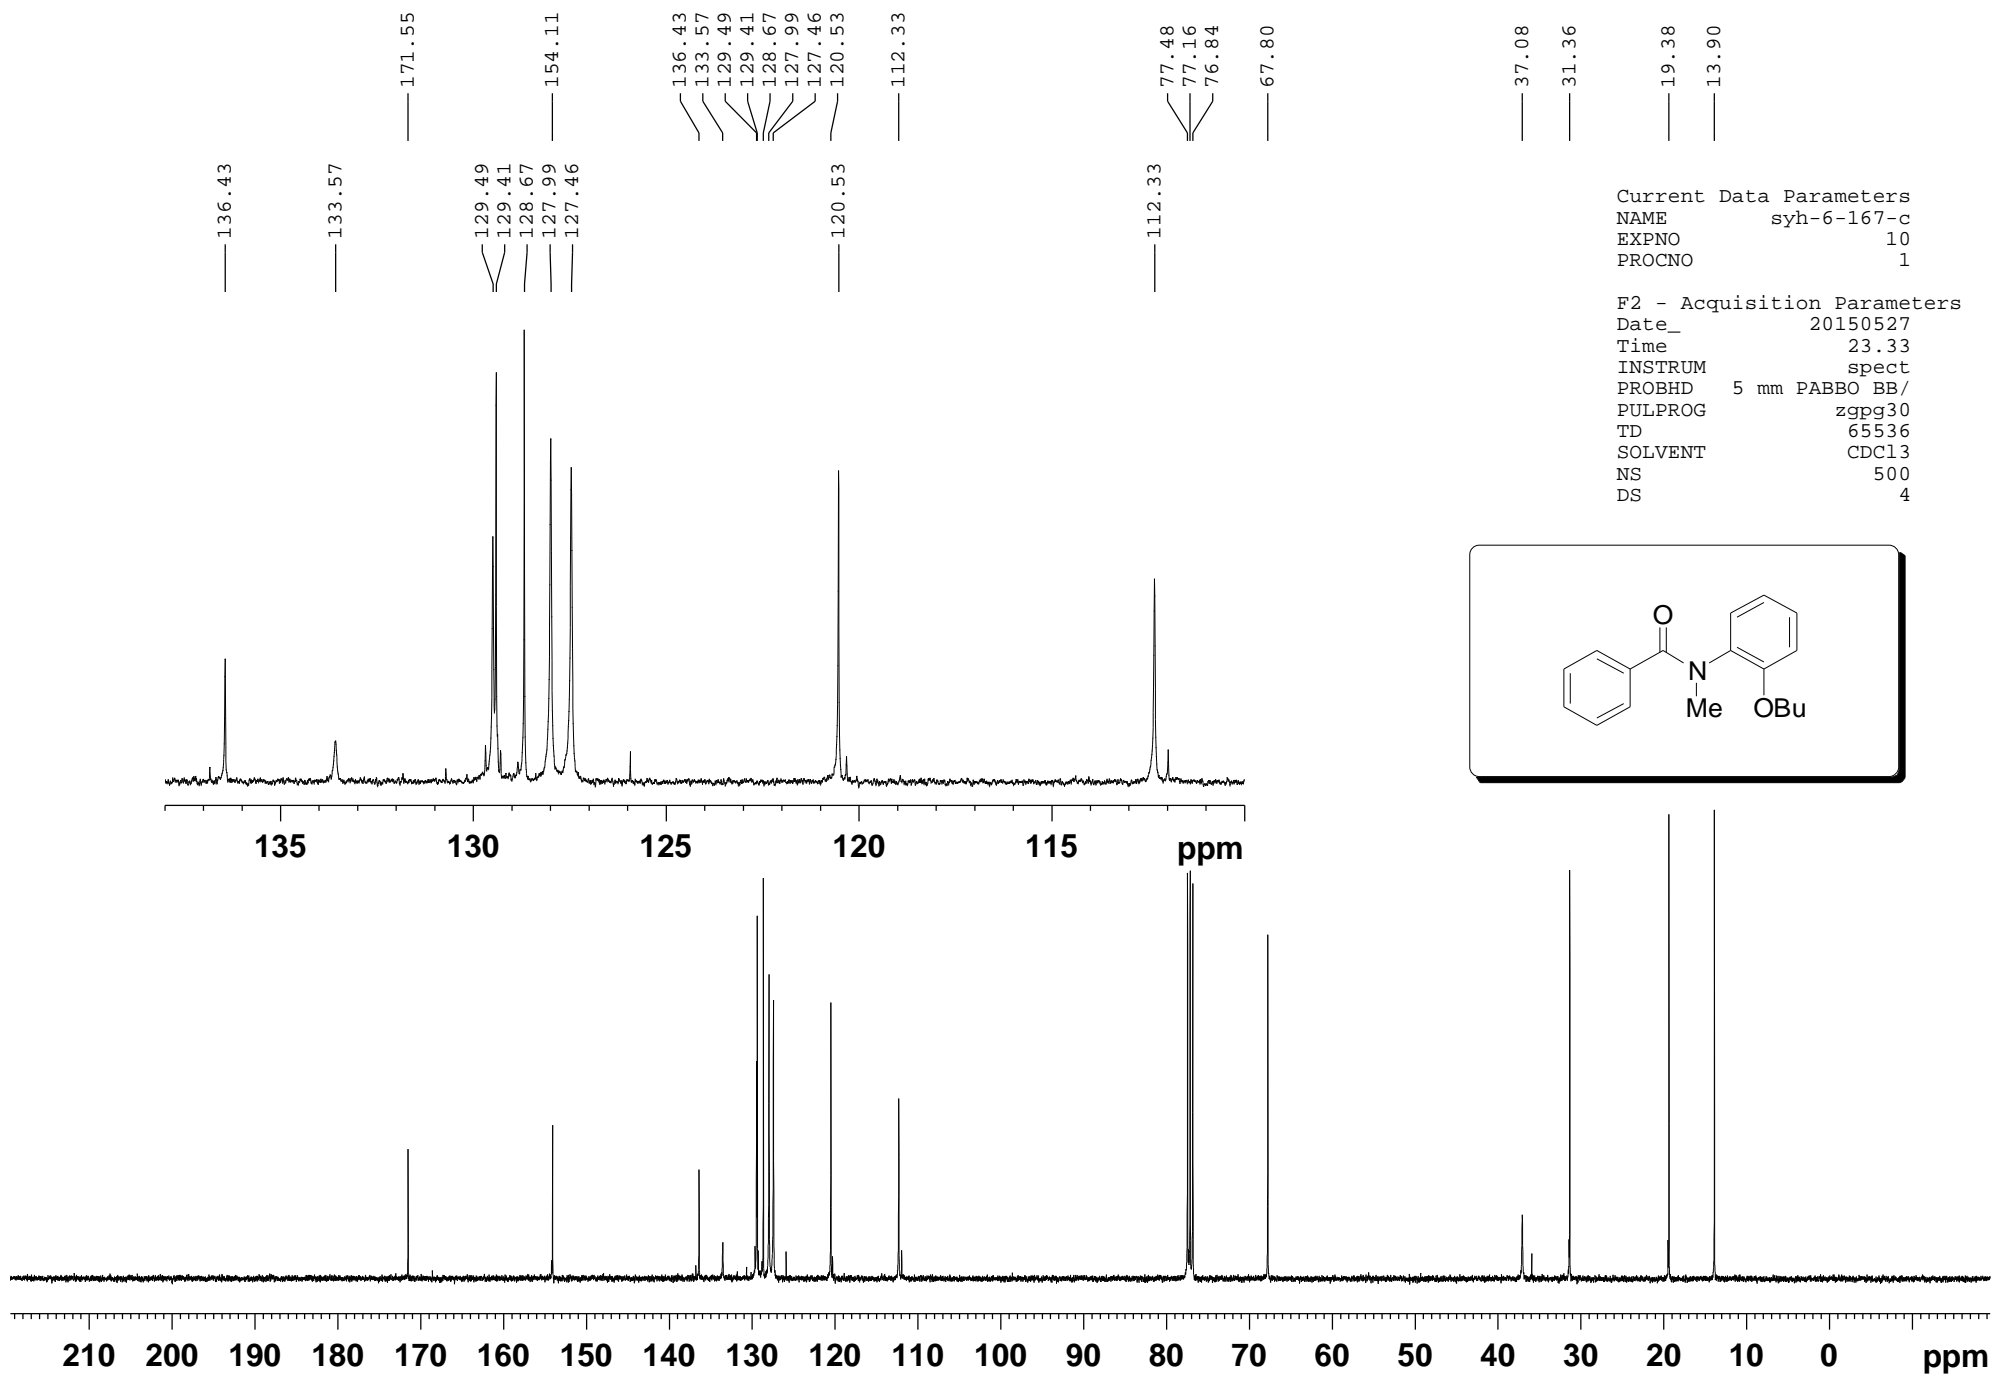

Current Data Parameters  
 NAME syh-6-167-c  
 EXPNO 10  
 PROCNO 1

F2 - Acquisition Parameters  
 Date\_ 20150527  
 Time 23.33  
 INSTRUM spect  
 PROBHD 5 mm PABBO BB/  
 PULPROG zgpg30  
 TD 65536  
 SOLVENT CDCl3  
 NS 500  
 DS 4

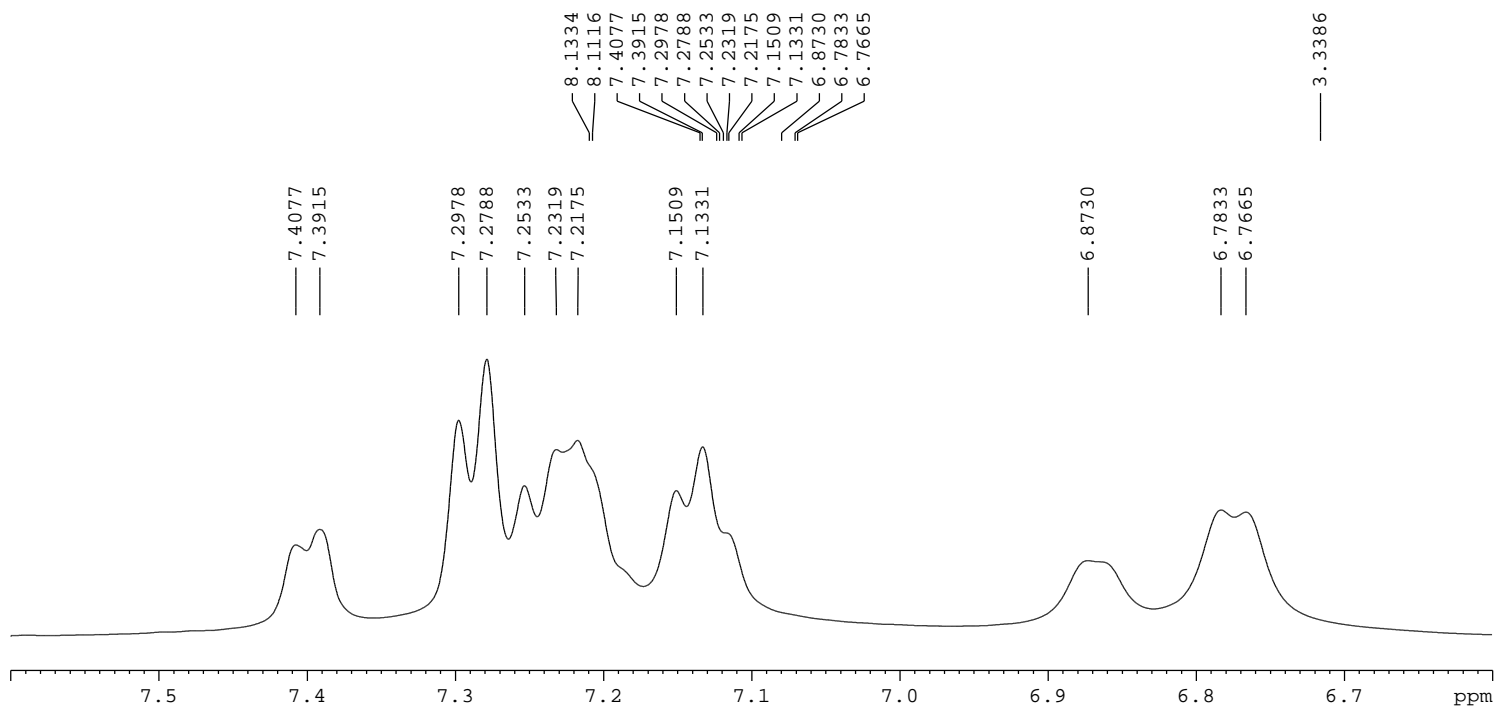

Current Data Parameters  
 NAME syh-7-305  
 EXPNO 10  
 PROCNO 1

F2 - Acquisition Parameters  
 Date\_ 20150525  
 Time 21.33  
 INSTRUM spect  
 PROBHD 5 mm PABBO BB-  
 PULPROG zg30  
 TD 65536  
 SOLVENT CDCl3

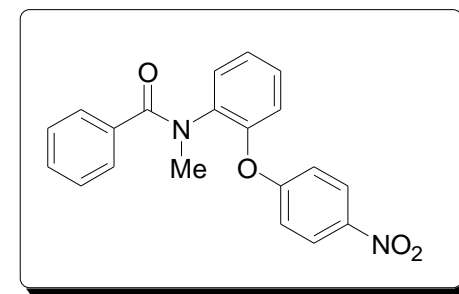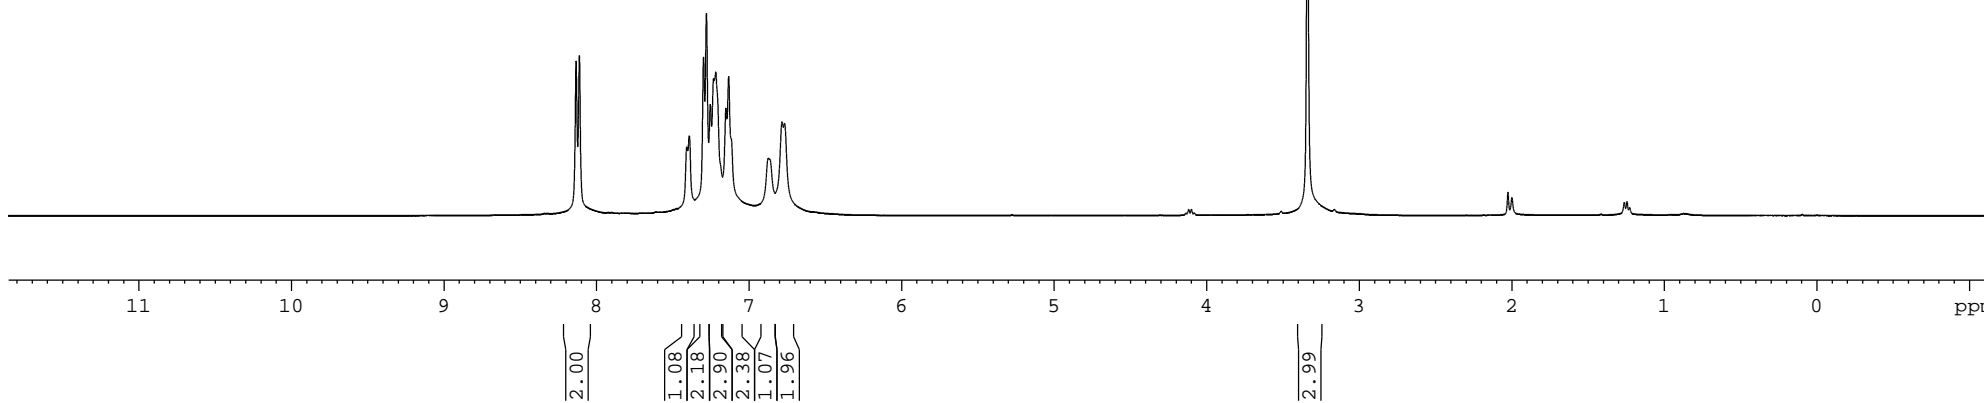

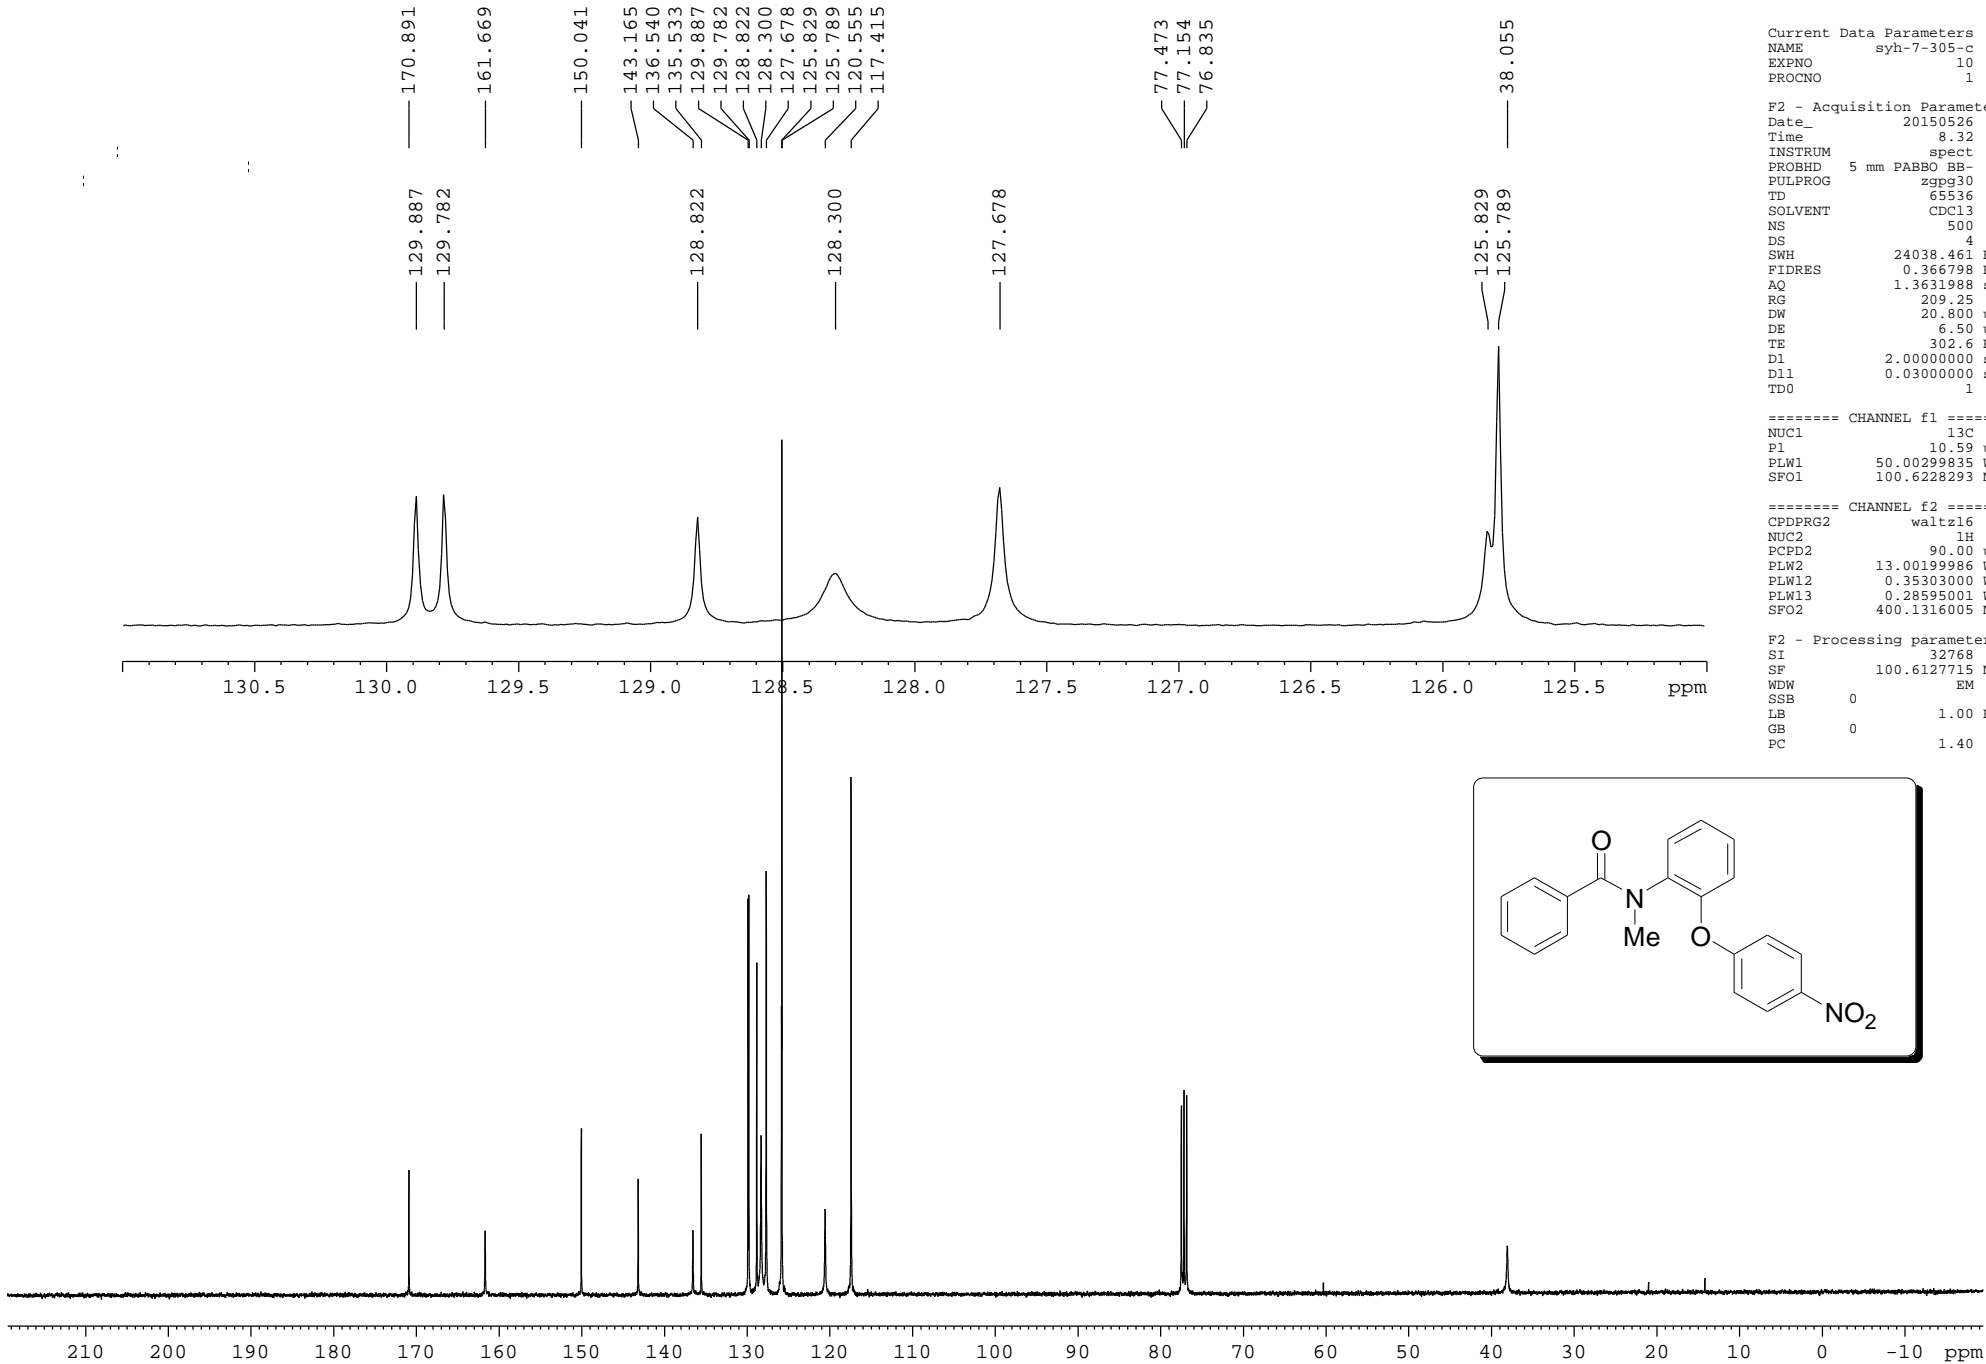

Current Data Parameters  
NAME syh-7-305-c  
EXPNO 10  
PROCNO 1

F2 - Acquisition Parameters  
Date\_ 20150526  
Time 8.32  
INSTRUM spect  
PROBHD 5 mm PABBO BB-  
PULPROG zgpg30  
TD 65536  
SOLVENT CDCl3  
NS 500  
DS 4  
SWH 24038.461 Hz  
FIDRES 0.366798 Hz  
AQ 1.3631988 se  
RG 209.25  
DW 20.800 us  
DE 6.50 us  
TE 302.6 K  
D1 2.00000000 se  
D11 0.03000000 se  
TD0 1

==== CHANNEL f1 =====  
NUC1 13C  
P1 10.59 us  
PLW1 50.00299835 W  
SFO1 100.6228293 MH

==== CHANNEL f2 =====  
CPDPRG2 waltz16  
NUC2 1H  
PCPD2 90.00 us  
PLW12 13.00199986 W  
PLW13 0.35303000 W  
SFO2 400.1316005 MH

F2 - Processing parameters  
SI 32768  
SF 100.6127715 MH  
WDW EM  
SSB 0  
LB 1.00 Hz  
GB 0  
PC 1.40



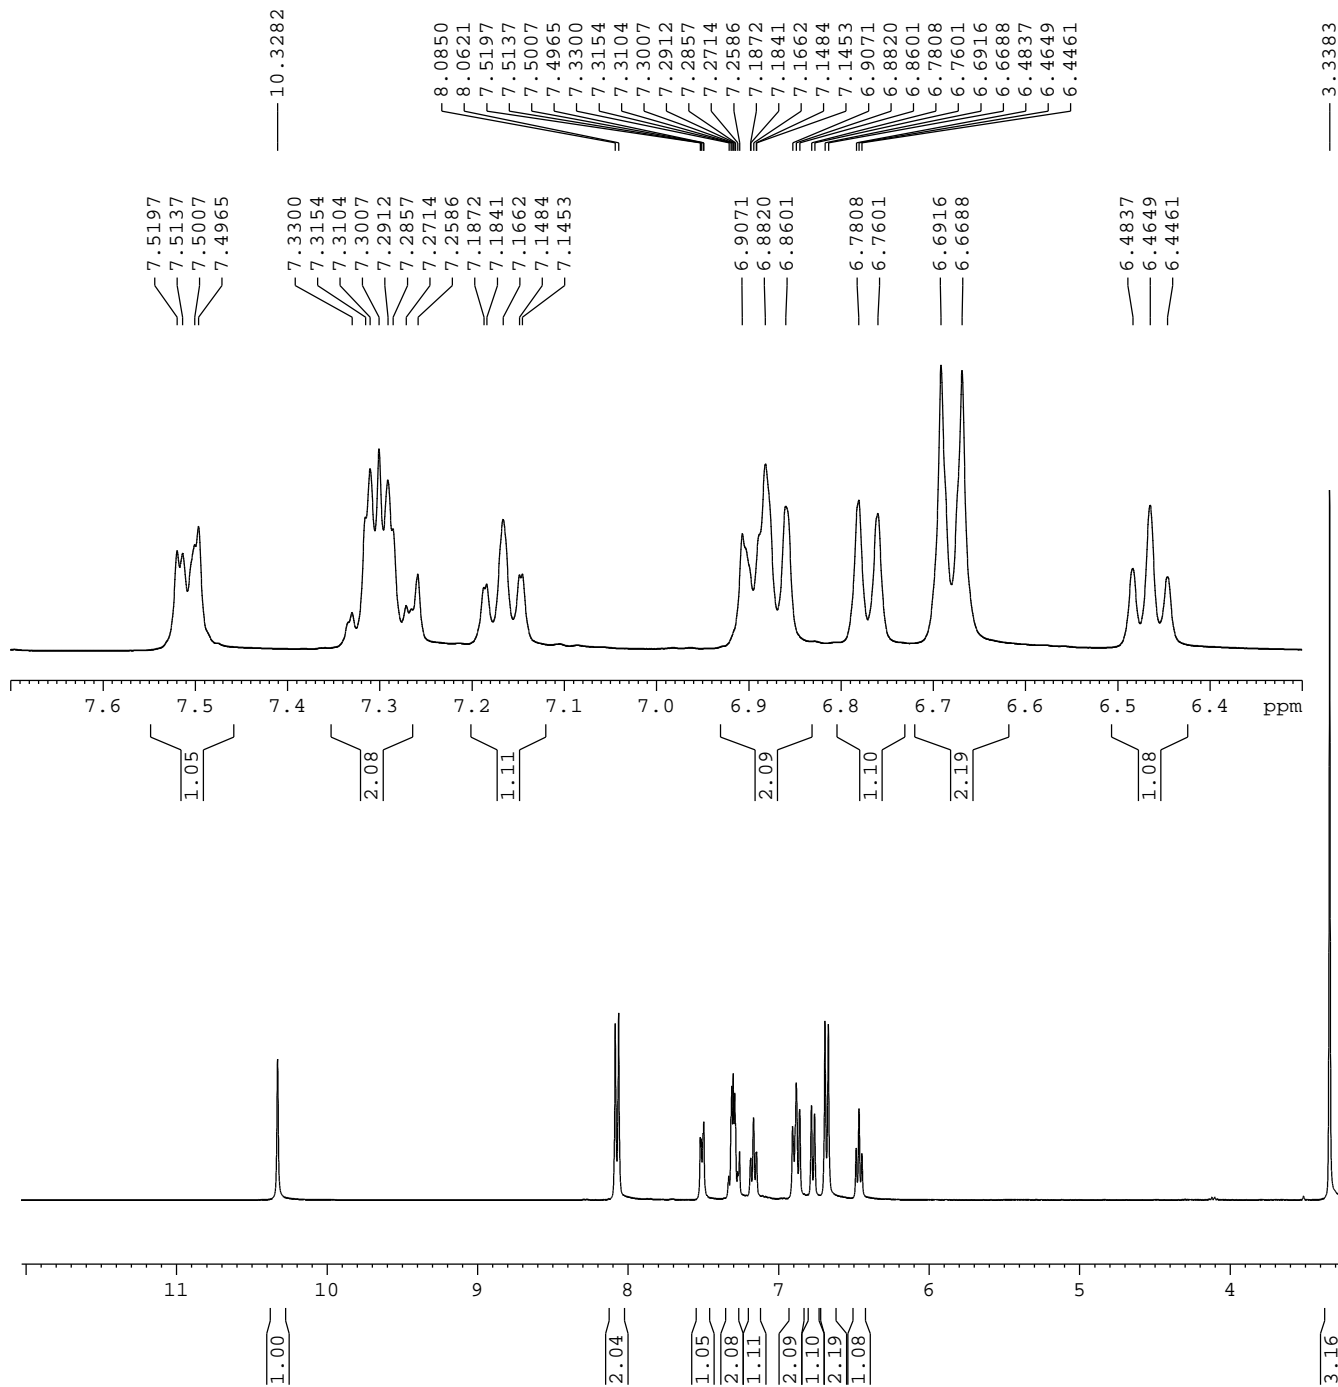

Current Data Parameters  
 NAME syh-8-5-p  
 EXPNO 10  
 PROCNO 1

F2 - Acquisition Parameters  
 Date\_ 20150527  
 Time 21.36  
 INSTRUM spect  
 PROBHD 5 mm PABBO BB-  
 PULPROG zg30  
 TD 65536  
 SOLVENT CDCl3

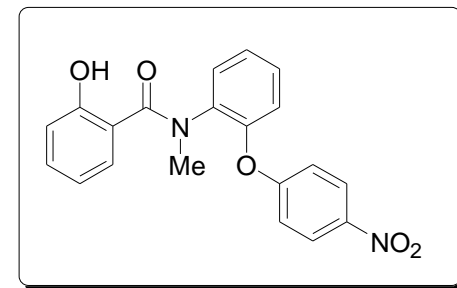

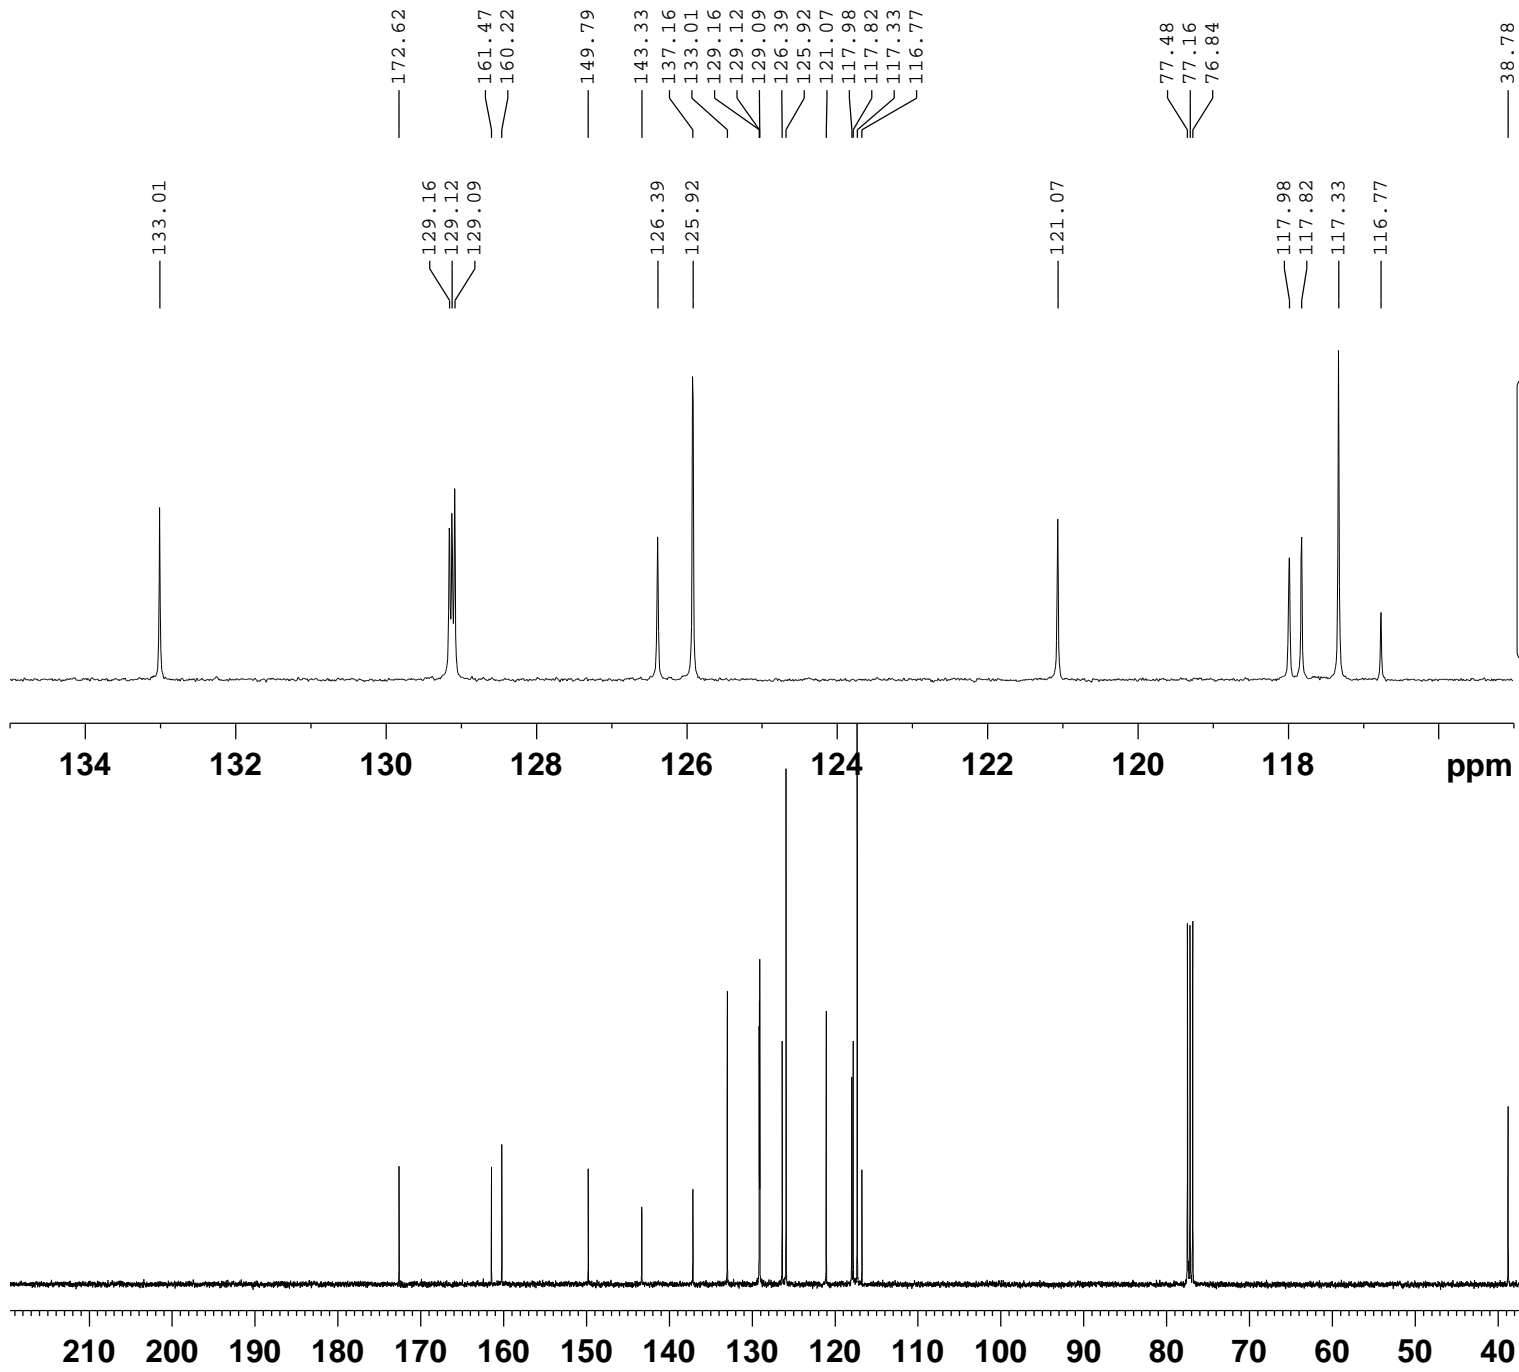

Current Data Parameters  
 NAME syh-8-5-c  
 EXPNO 20  
 PROCNO 1

F2 - Acquisition Parameters  
 Date\_ 20150527  
 Time 23.59  
 INSTRUM spect  
 PROBHD 5 mm PABBO BB/  
 PULPROG zgpg30  
 TD 65536

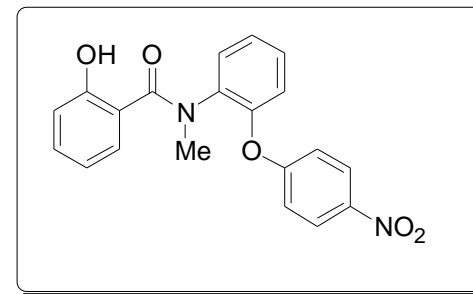

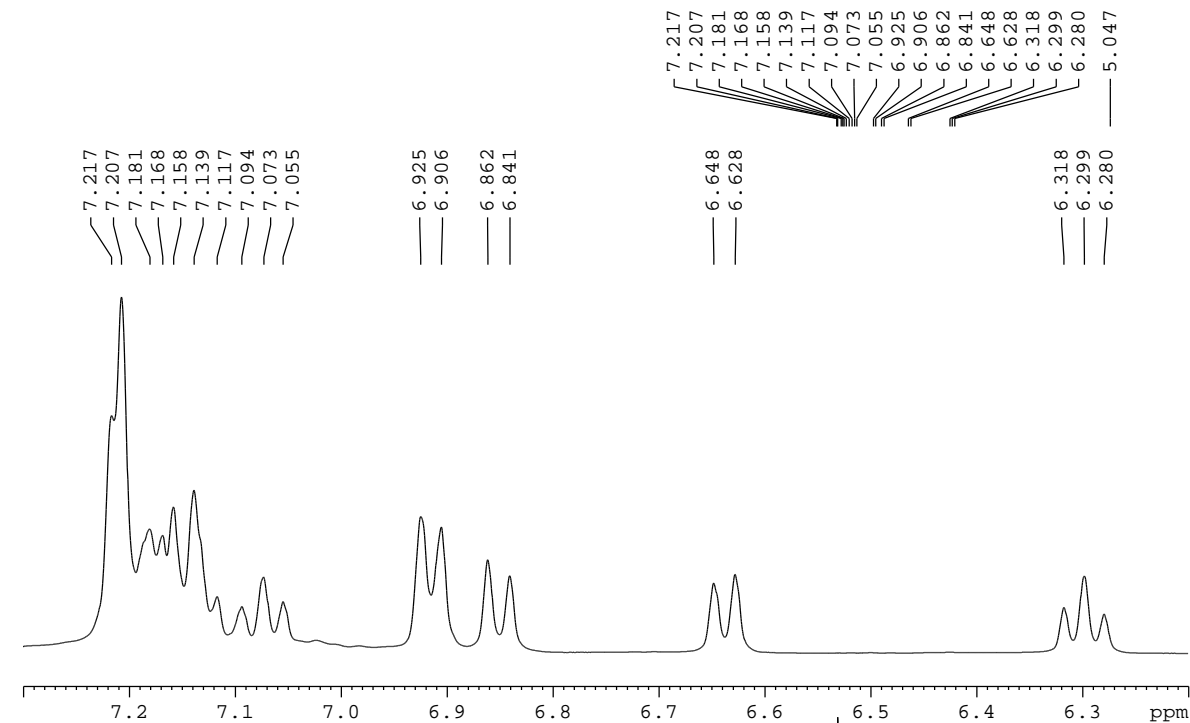

Current Data Parameters  
 NAME syh-6-255  
 EXPNO 10  
 PROCNO 1

F2 - Acquisition Parameters  
 Date\_ 20141213  
 Time 16.59  
 INSTRUM spect  
 PROBHD 5 mm PABBO BB/  
 PULPROG zg30  
 TD 65536  
 SOLVENT CDCl3

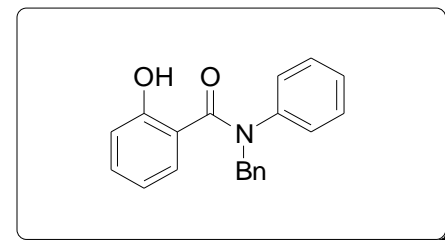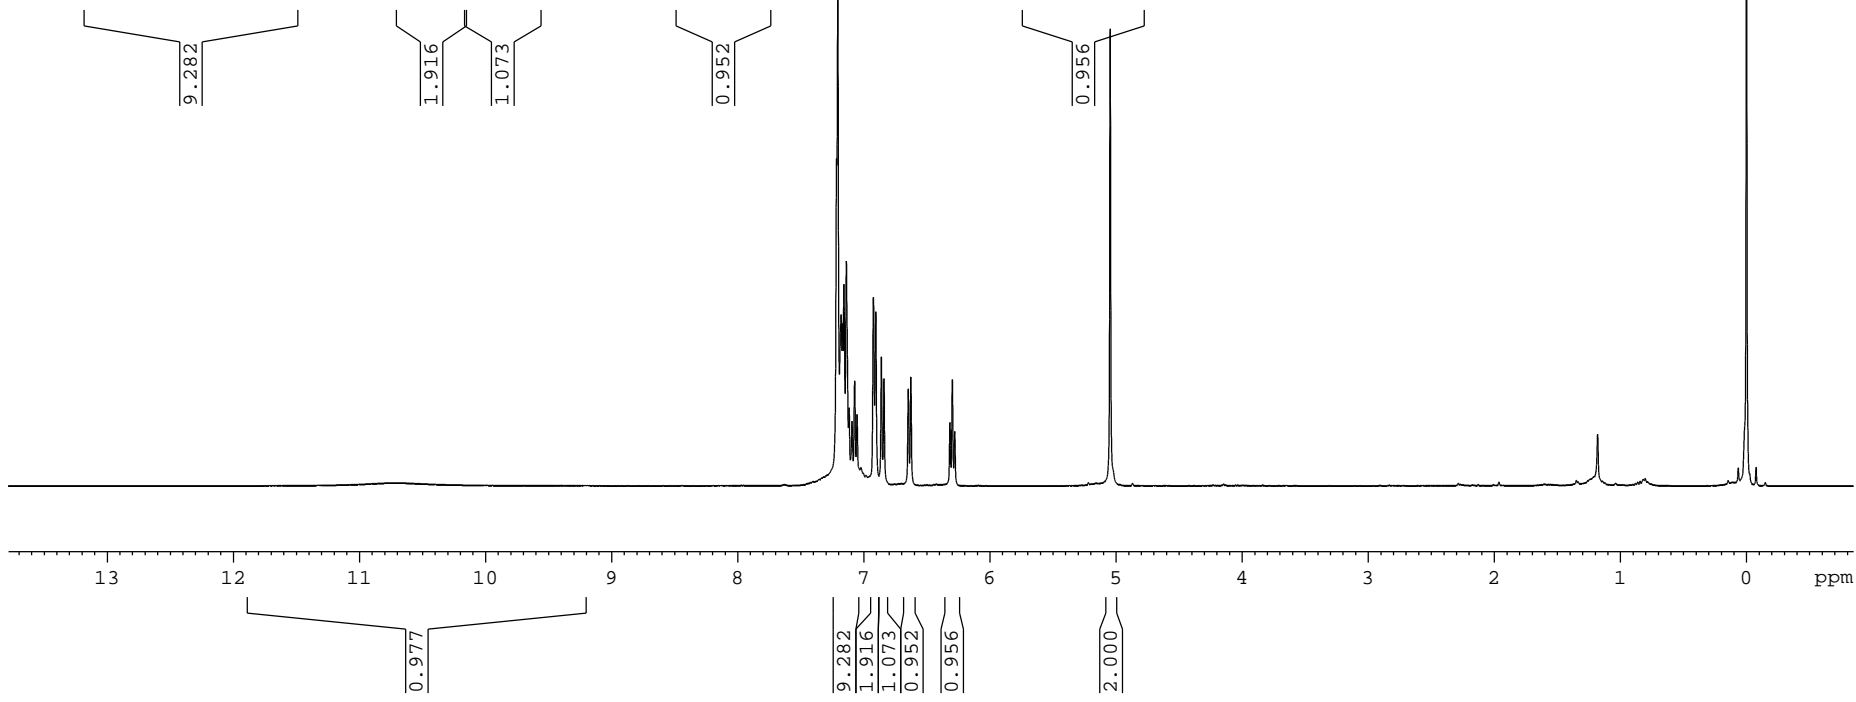

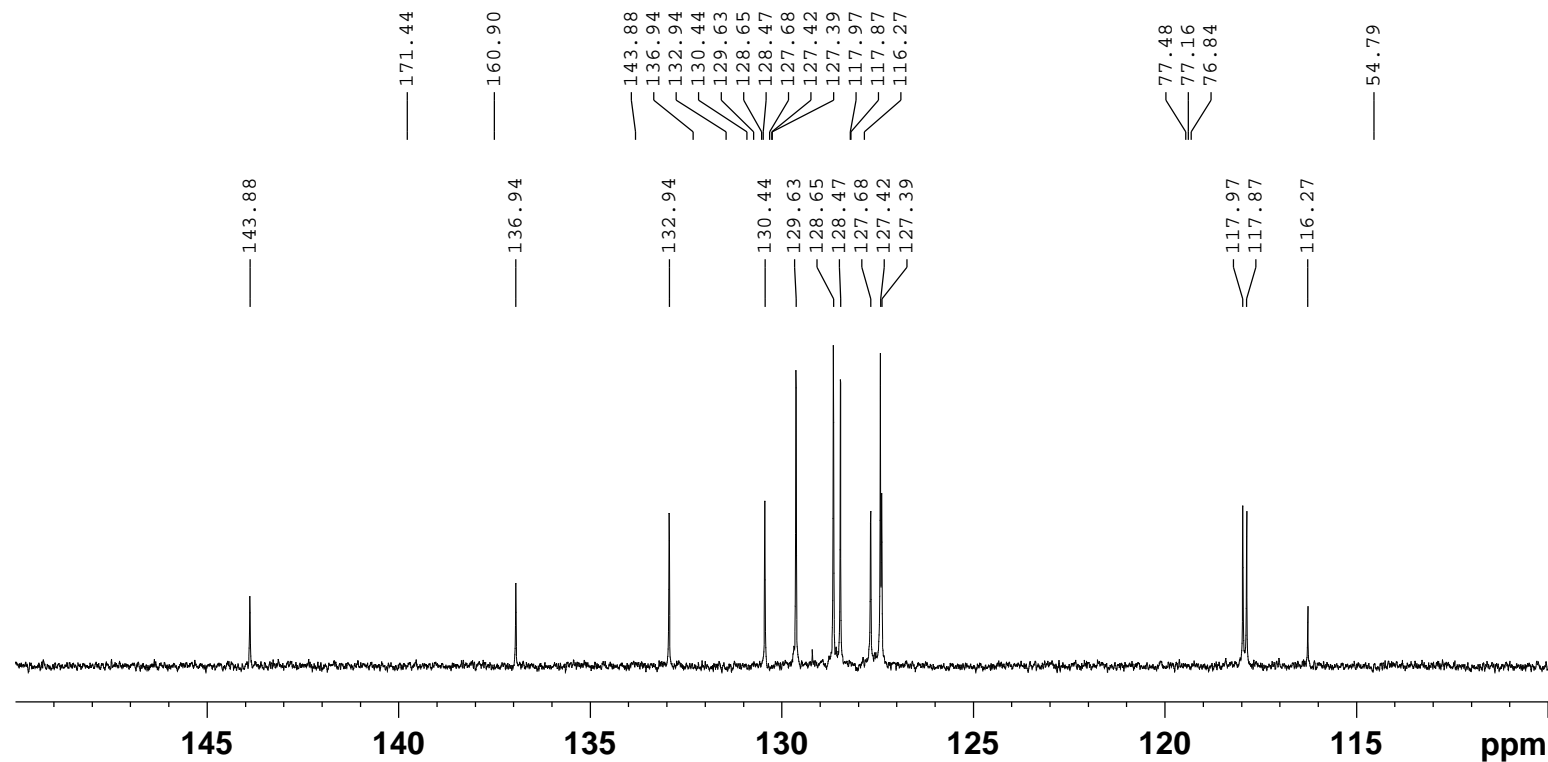

Current Data Parameters  
 NAME syh-6-255-c  
 EXPNO 10  
 PROCNO 1

F2 - Acquisition Parameters  
 Date\_ 20141213  
 Time 17.15  
 INSTRUM spect  
 PROBHD 5 mm PABBO BB/  
 PULPROG zgpg30  
 TD 65536  
 SOLVENT CDCl3  
 NS 400  
 DS 4

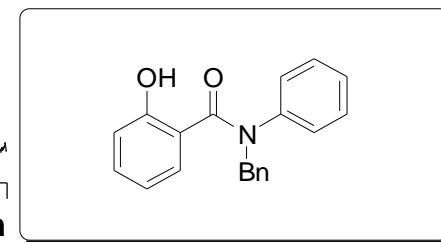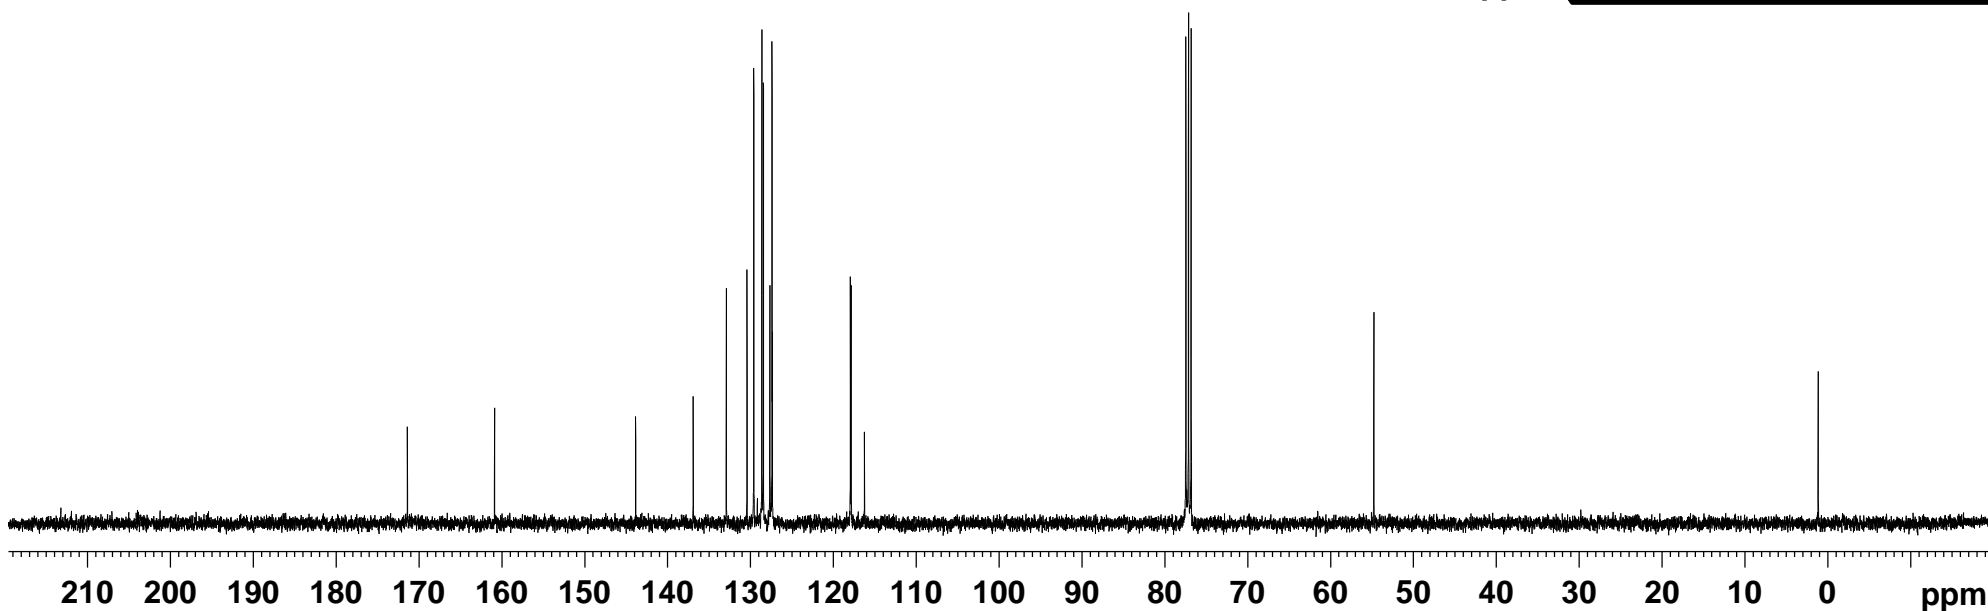

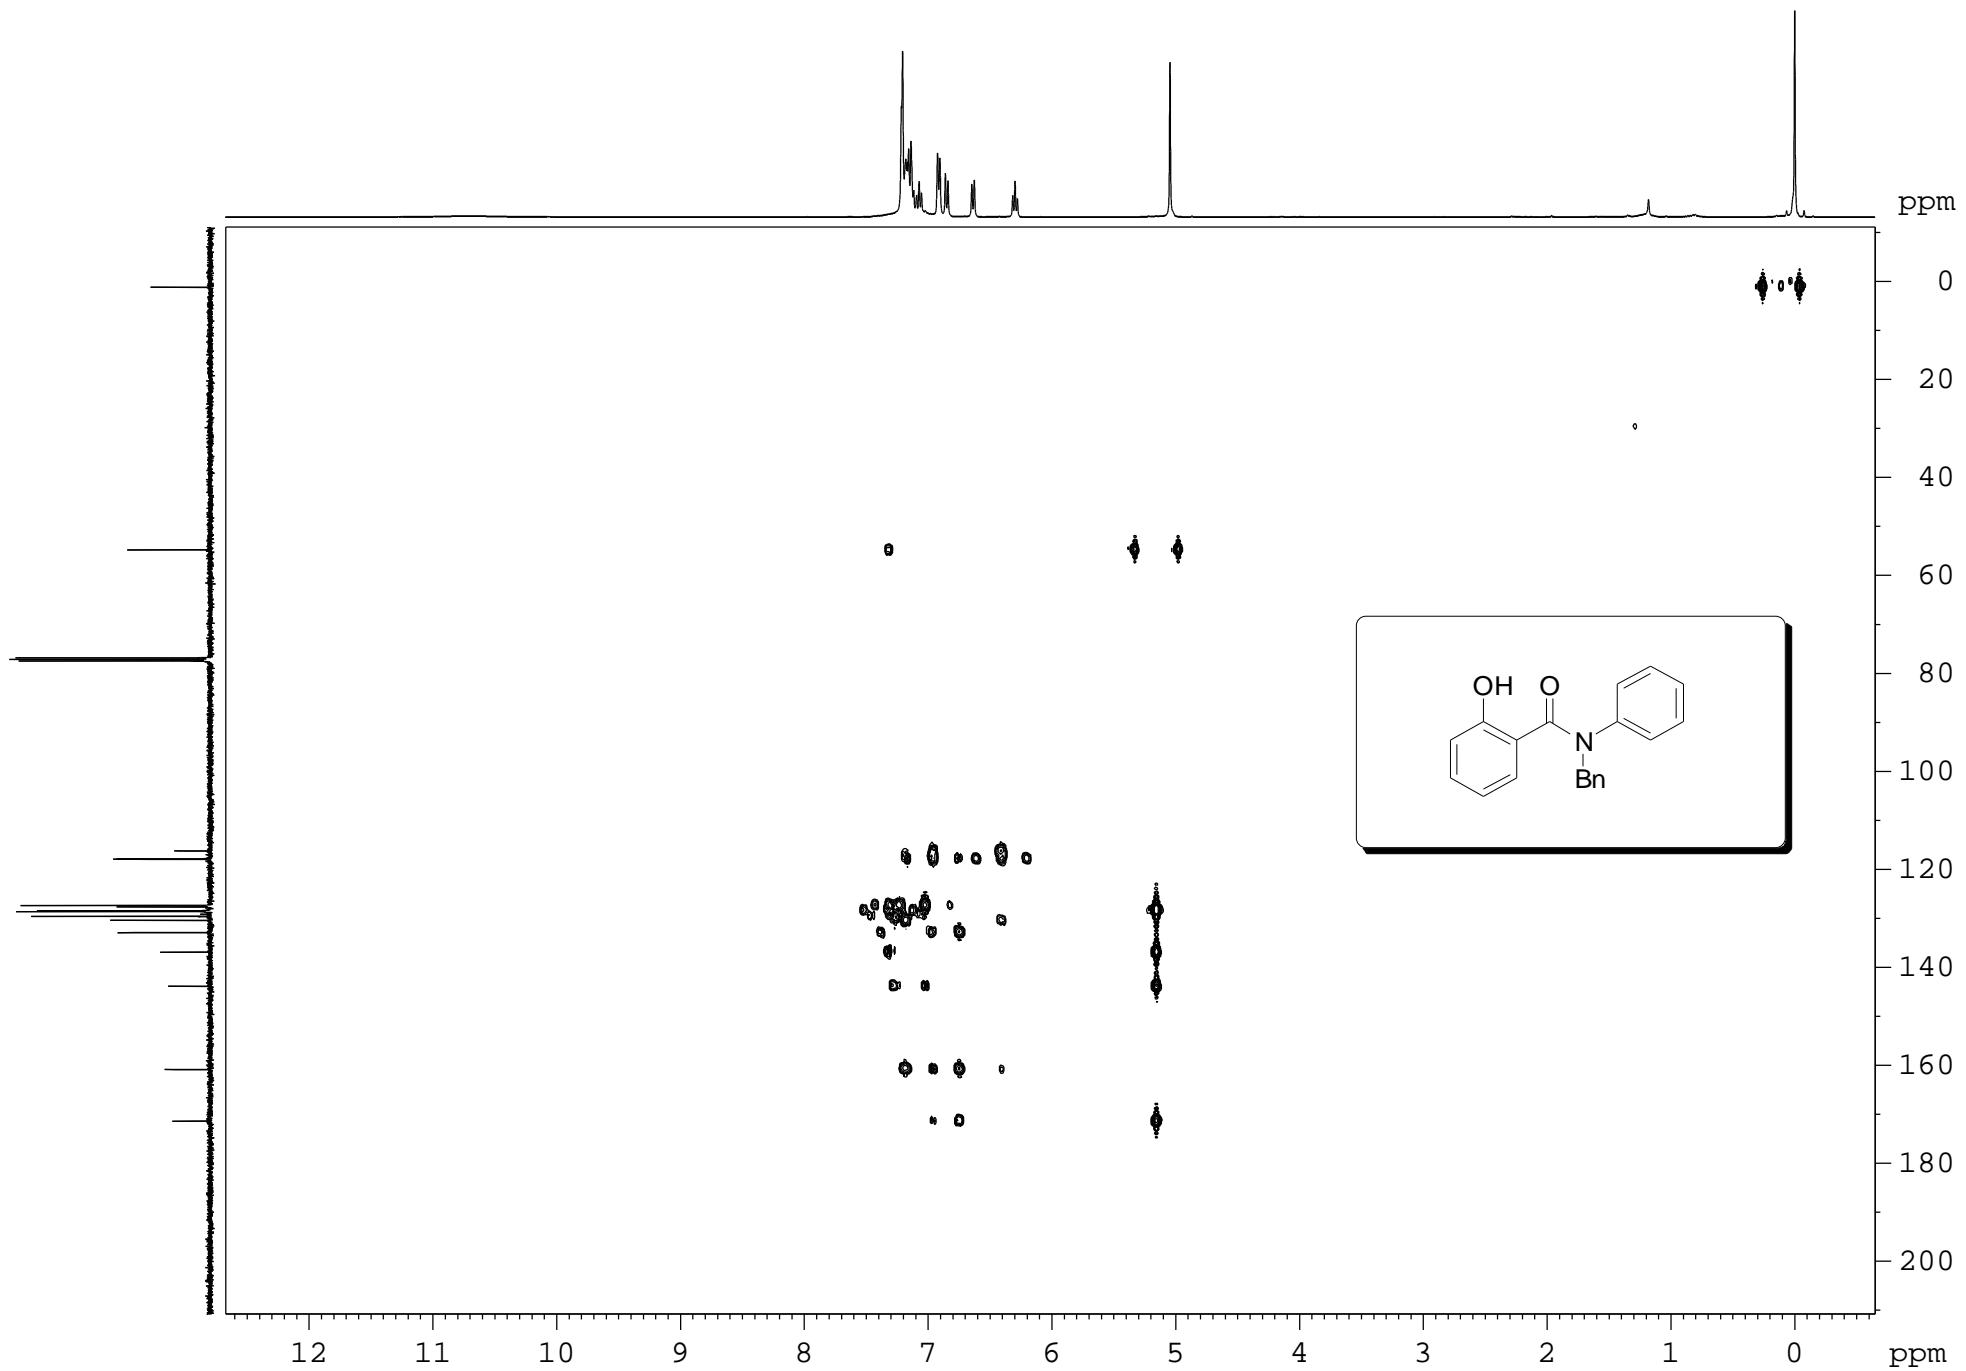

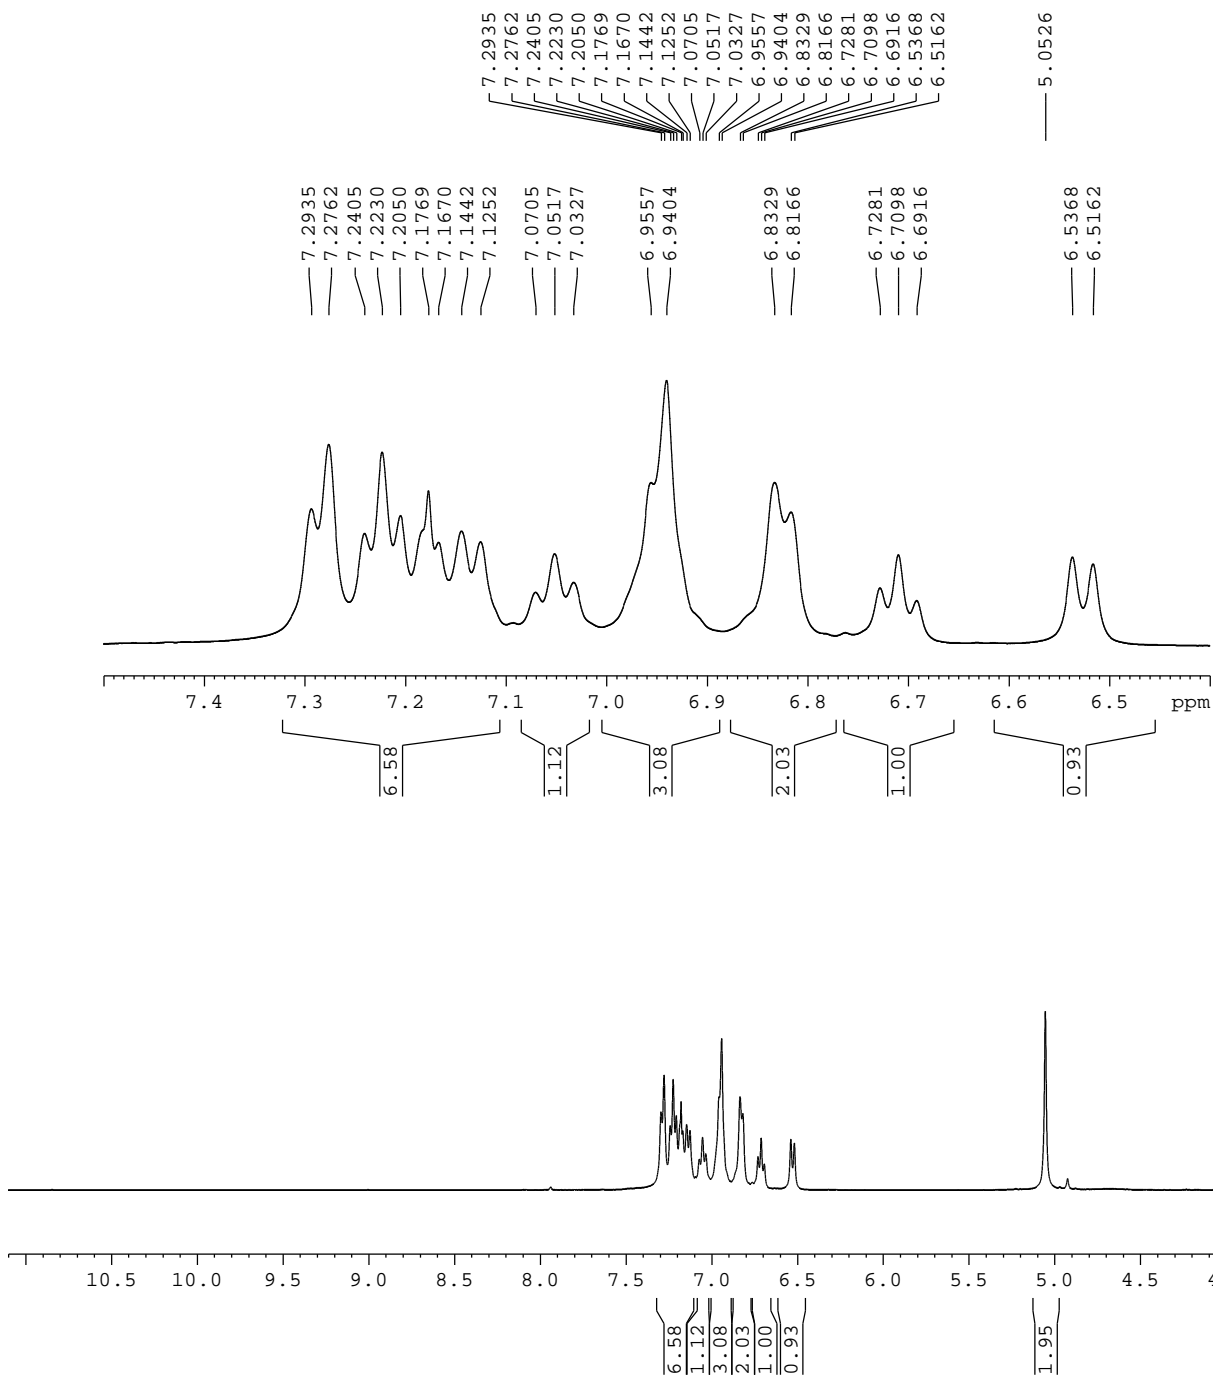

Current Data Parameters  
 NAME syh-6-163  
 EXPNO 10  
 PROCNO 1

F2 - Acquisition Parameters  
 Date\_ 20141216  
 Time 14.29  
 INSTRUM spect  
 PROBHD 5 mm PABBO BB-  
 PULPROG zg30  
 TD 65536  
 SOLVENT CDCl3

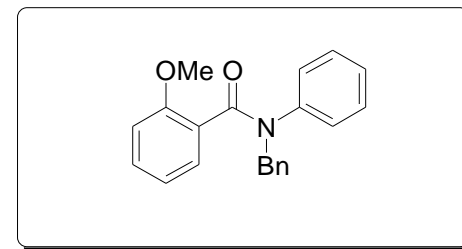

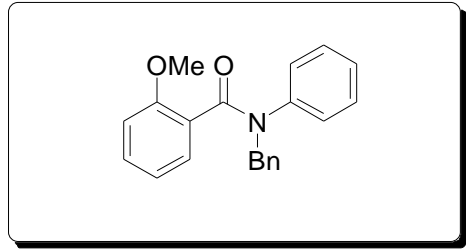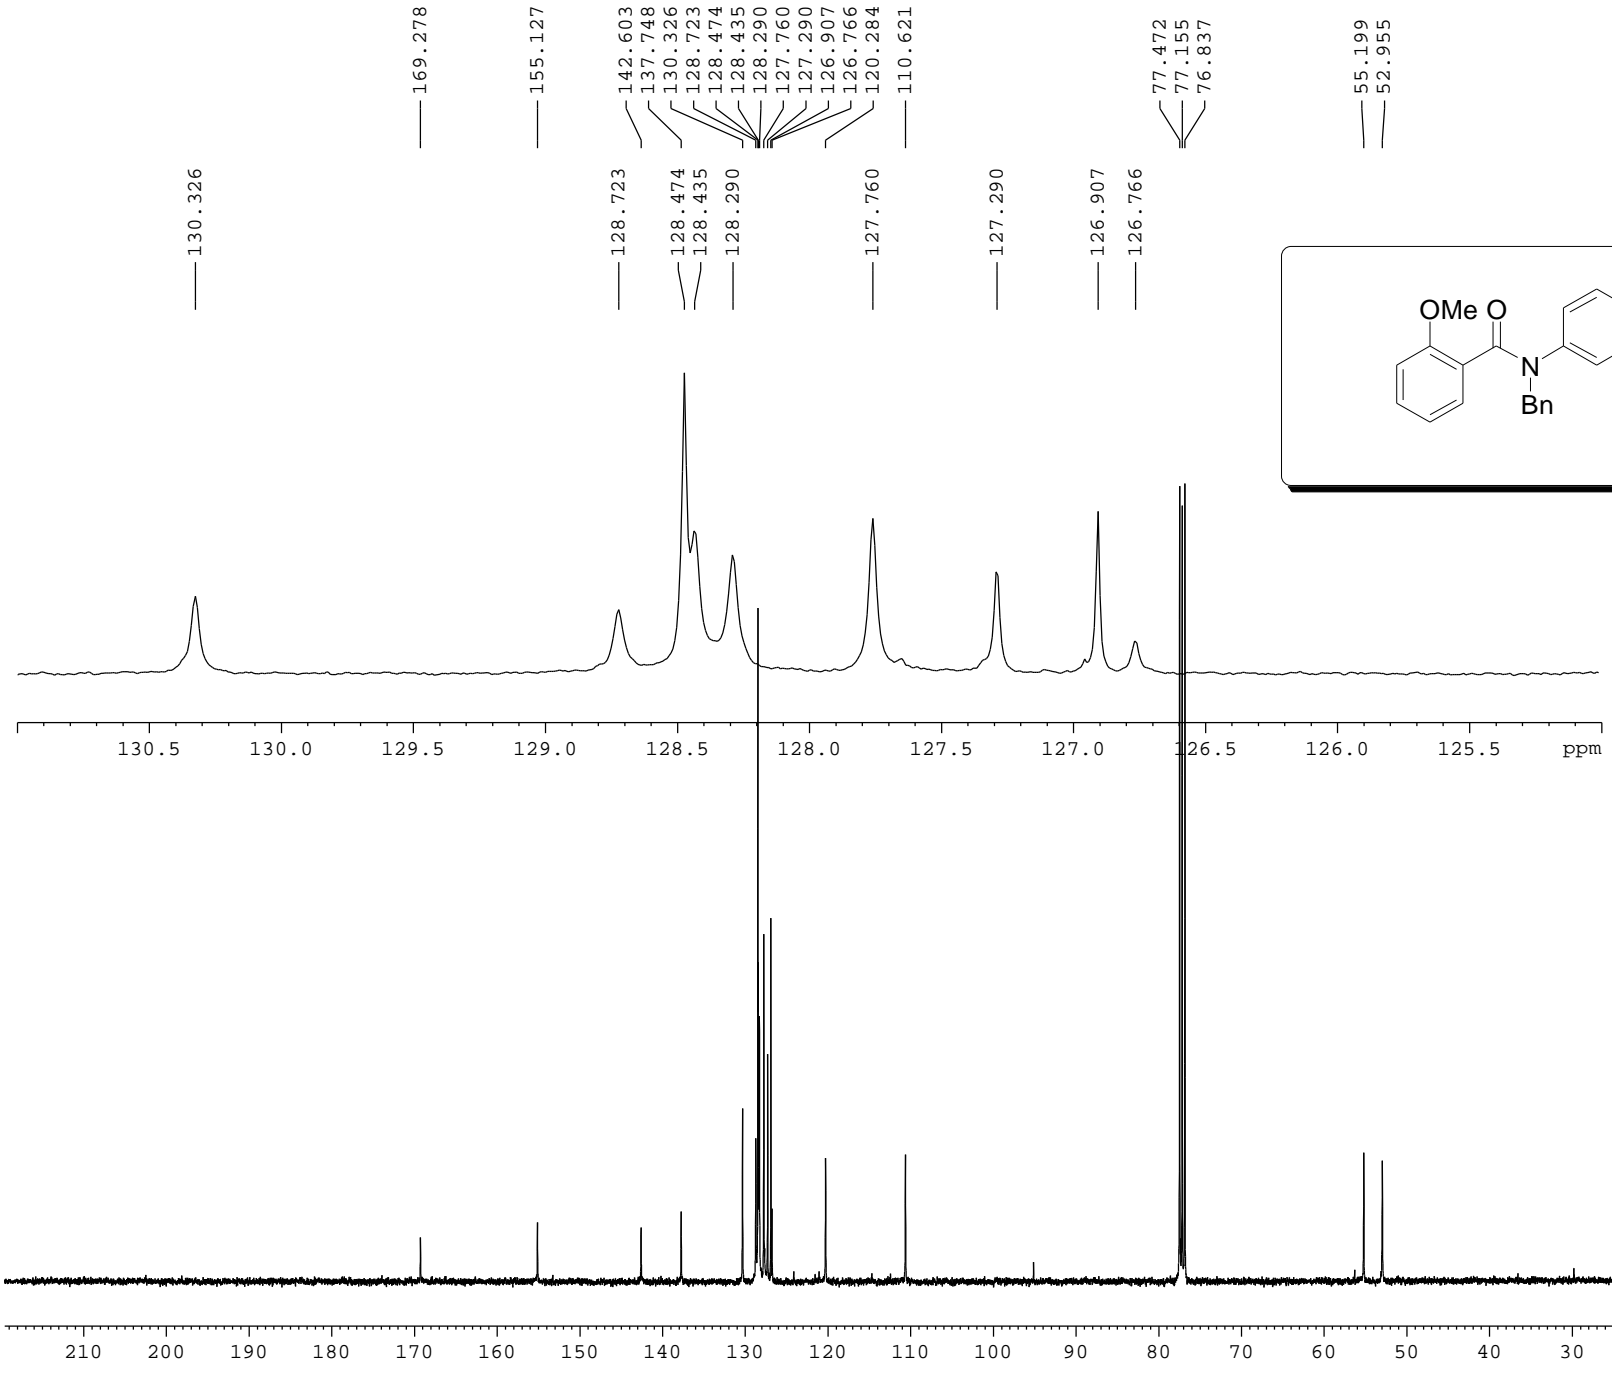

Current Data Parameters  
 NAME syh-6-163-c  
 EXPNO 12  
 PROCNO 1

F2 - Acquisition Parameters  
 Date\_ 20141217  
 Time 1.04  
 INSTRUM spect  
 PROBHD 5 mm PABBO BB-  
 PULPROG zgpg30  
 TD 65536  
 SOLVENT CDCl3  
 NS 1024  
 DS 4  
 SWH 24038.461 Hz  
 FIDRES 0.366798 Hz  
 AQ 1.3631988 se  
 RG 209.25  
 DW 20.800 us  
 DE 6.50 us  
 TE 298.7 K  
 D1 2.00000000 se  
 D11 0.03000000 se  
 TD0 1

==== CHANNEL f1 =====  
 NUC1 13C  
 P1 10.59 us  
 PLW1 50.00299835 W  
 SFO1 100.6228293 MH

==== CHANNEL f2 =====  
 CPDPRG2 waltz16  
 NUC2 1H  
 PCPD2 90.00 us  
 PLW2 13.00199986 W  
 PLW12 0.35303000 W  
 PLW13 0.28595001 W  
 SFO2 400.1316005 MH

F2 - Processing parameters  
 SI 32768  
 SF 100.6127602 MH  
 WDW EM  
 SSB 0  
 LB 1.00 Hz  
 GB 0  
 PC 1.40

Current Data Parameters  
NAME syh-7-201  
EXPNO 20  
PROCNO 1

F2 - Acquisition Parameters  
Date\_ 20150409  
Time 20.10  
INSTRUM spect  
PROBHD 5 mm PABBO BB/  
PULPROG zg30  
TD 65536  
SOLVENT MeOD

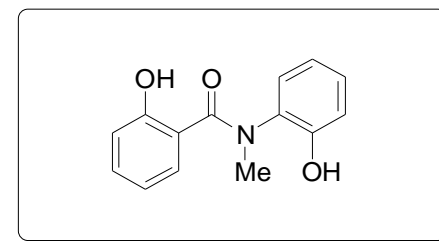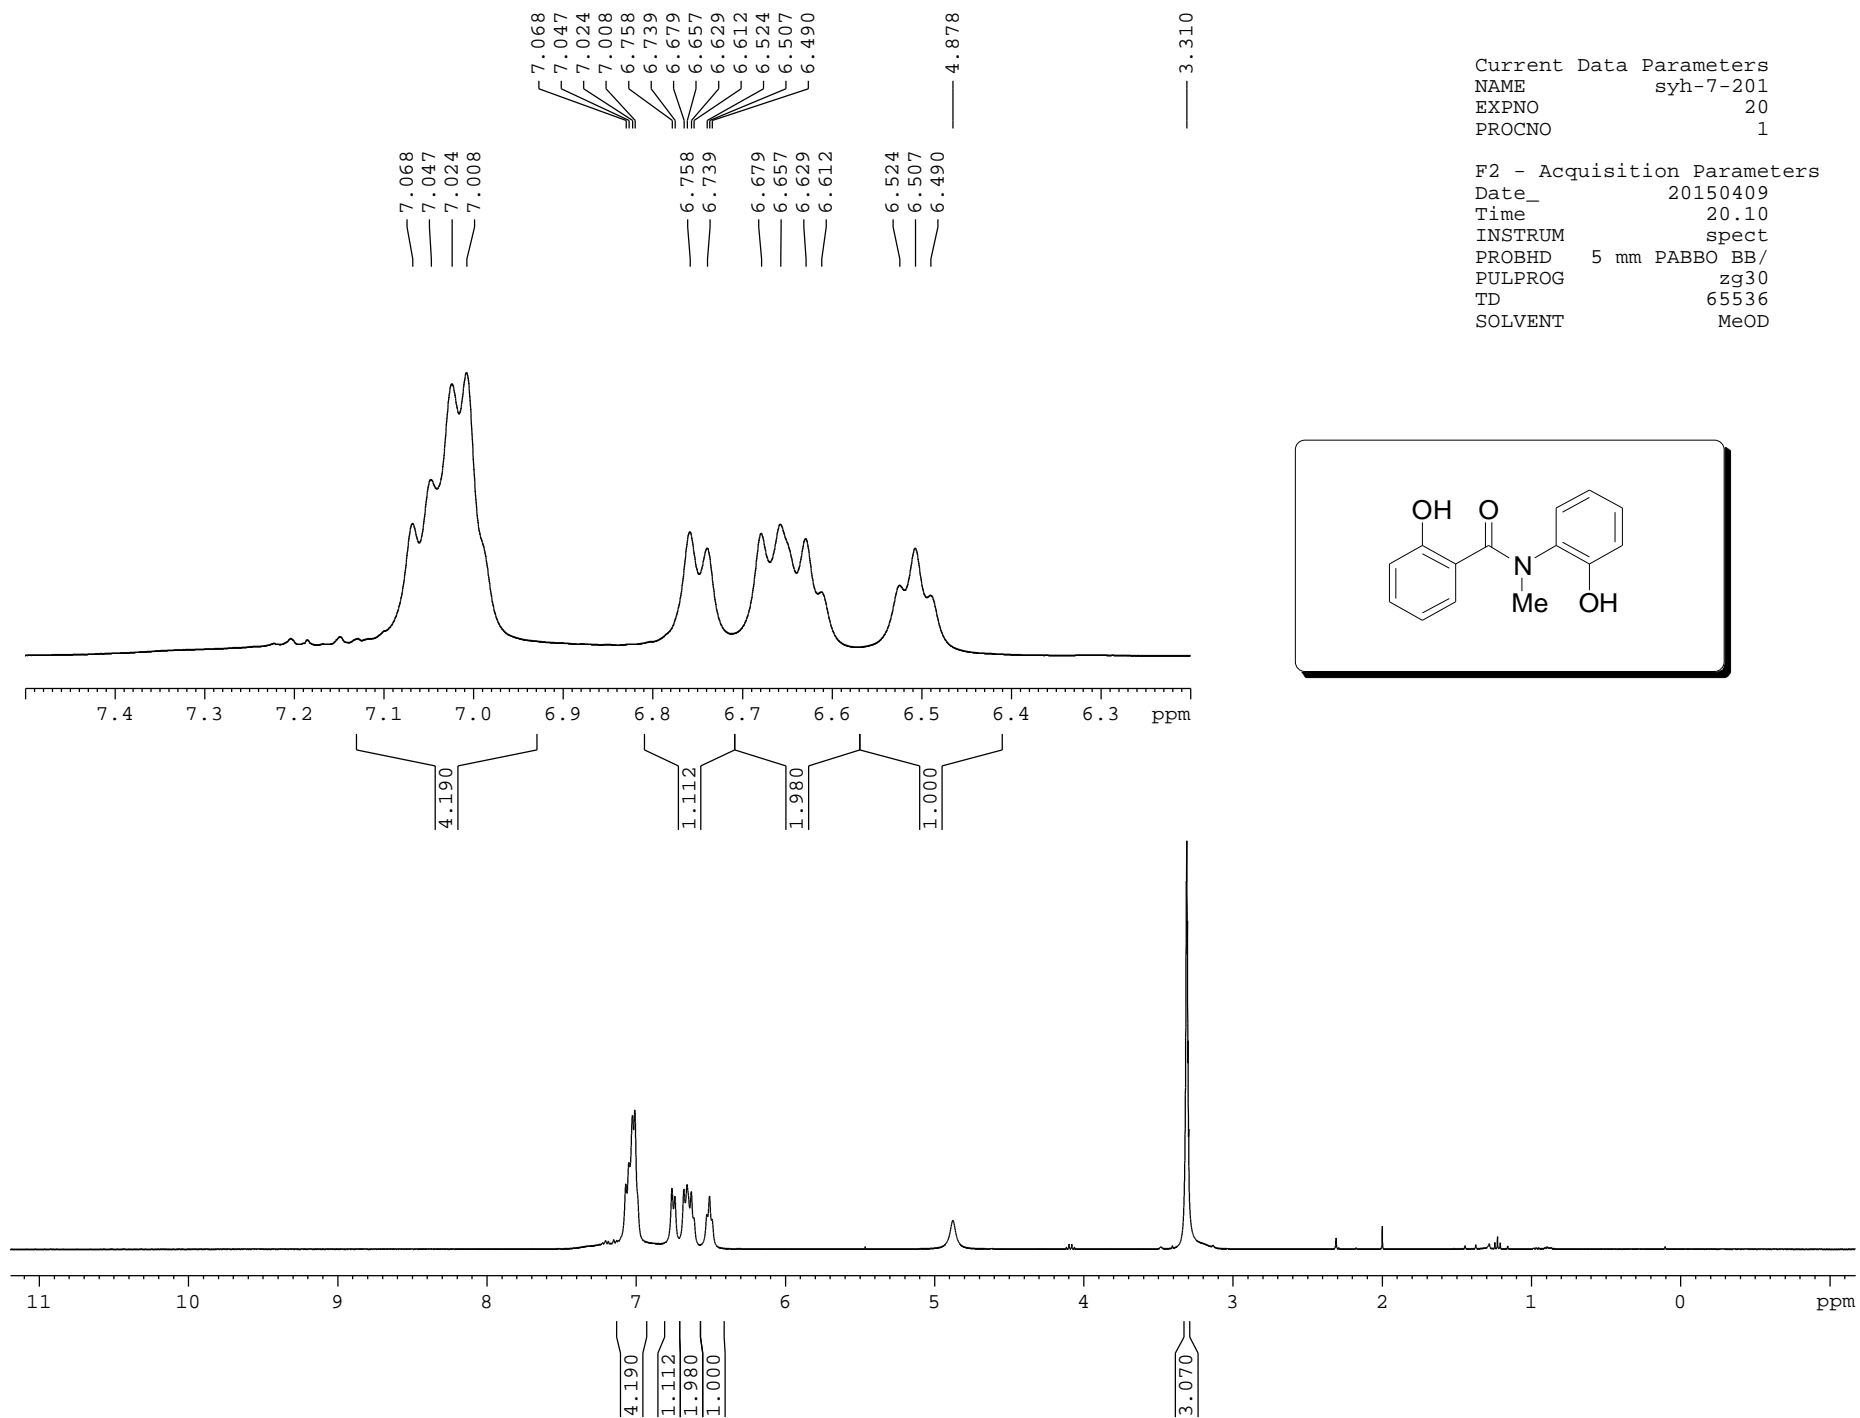



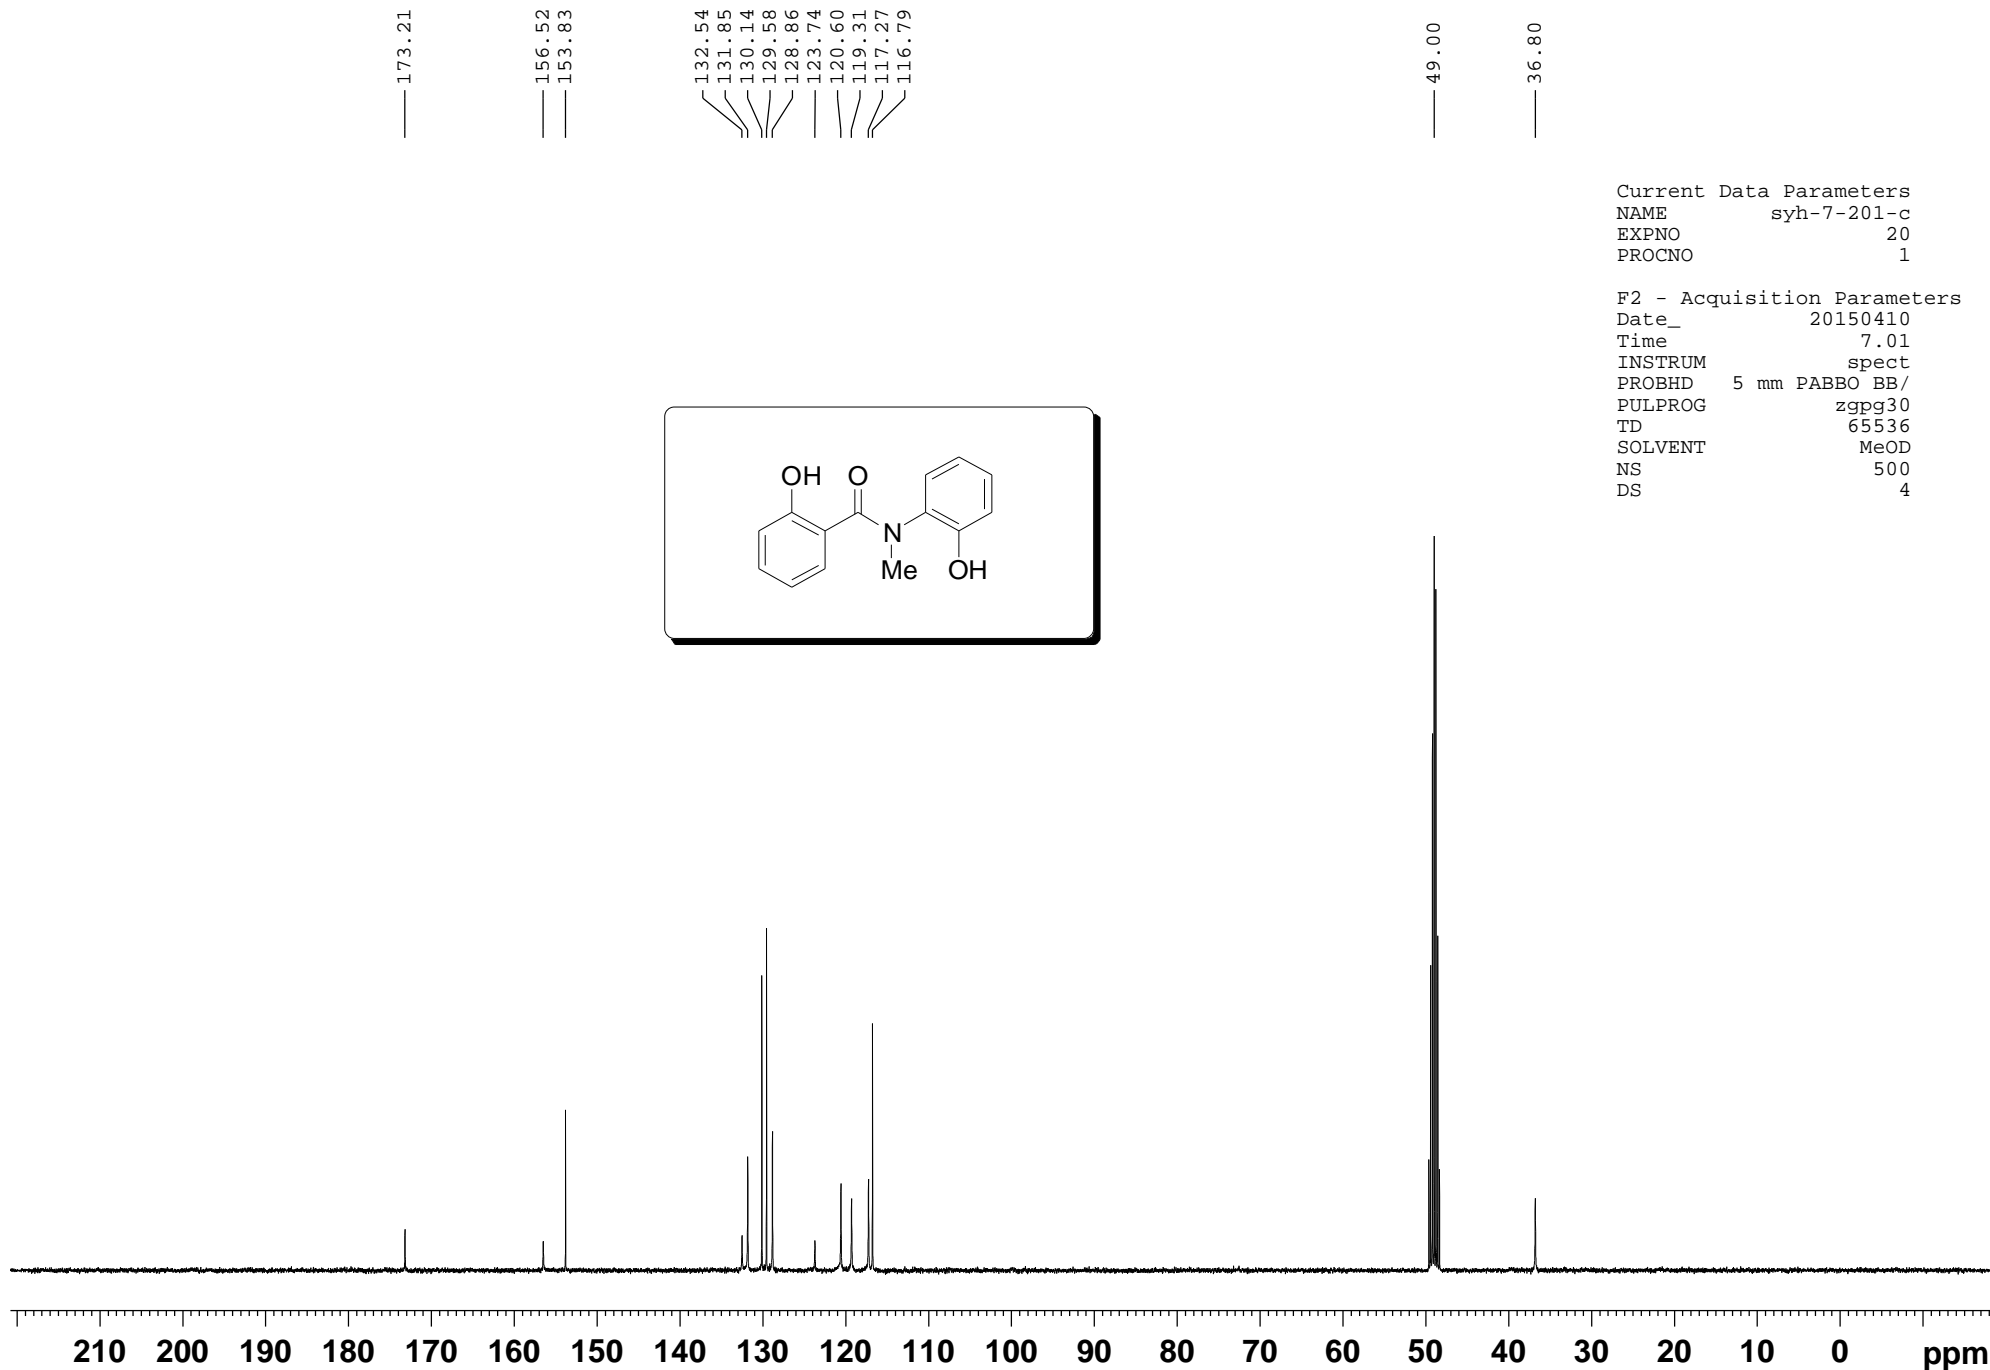

Current Data Parameters  
 NAME syh-7-201-c  
 EXPNO 20  
 PROCNO 1

F2 - Acquisition Parameters  
 Date\_ 20150410  
 Time 7.01  
 INSTRUM spect  
 PROBHD 5 mm PABBO BB/  
 PULPROG zgpg30  
 TD 65536  
 SOLVENT MeOD  
 NS 500  
 DS 4

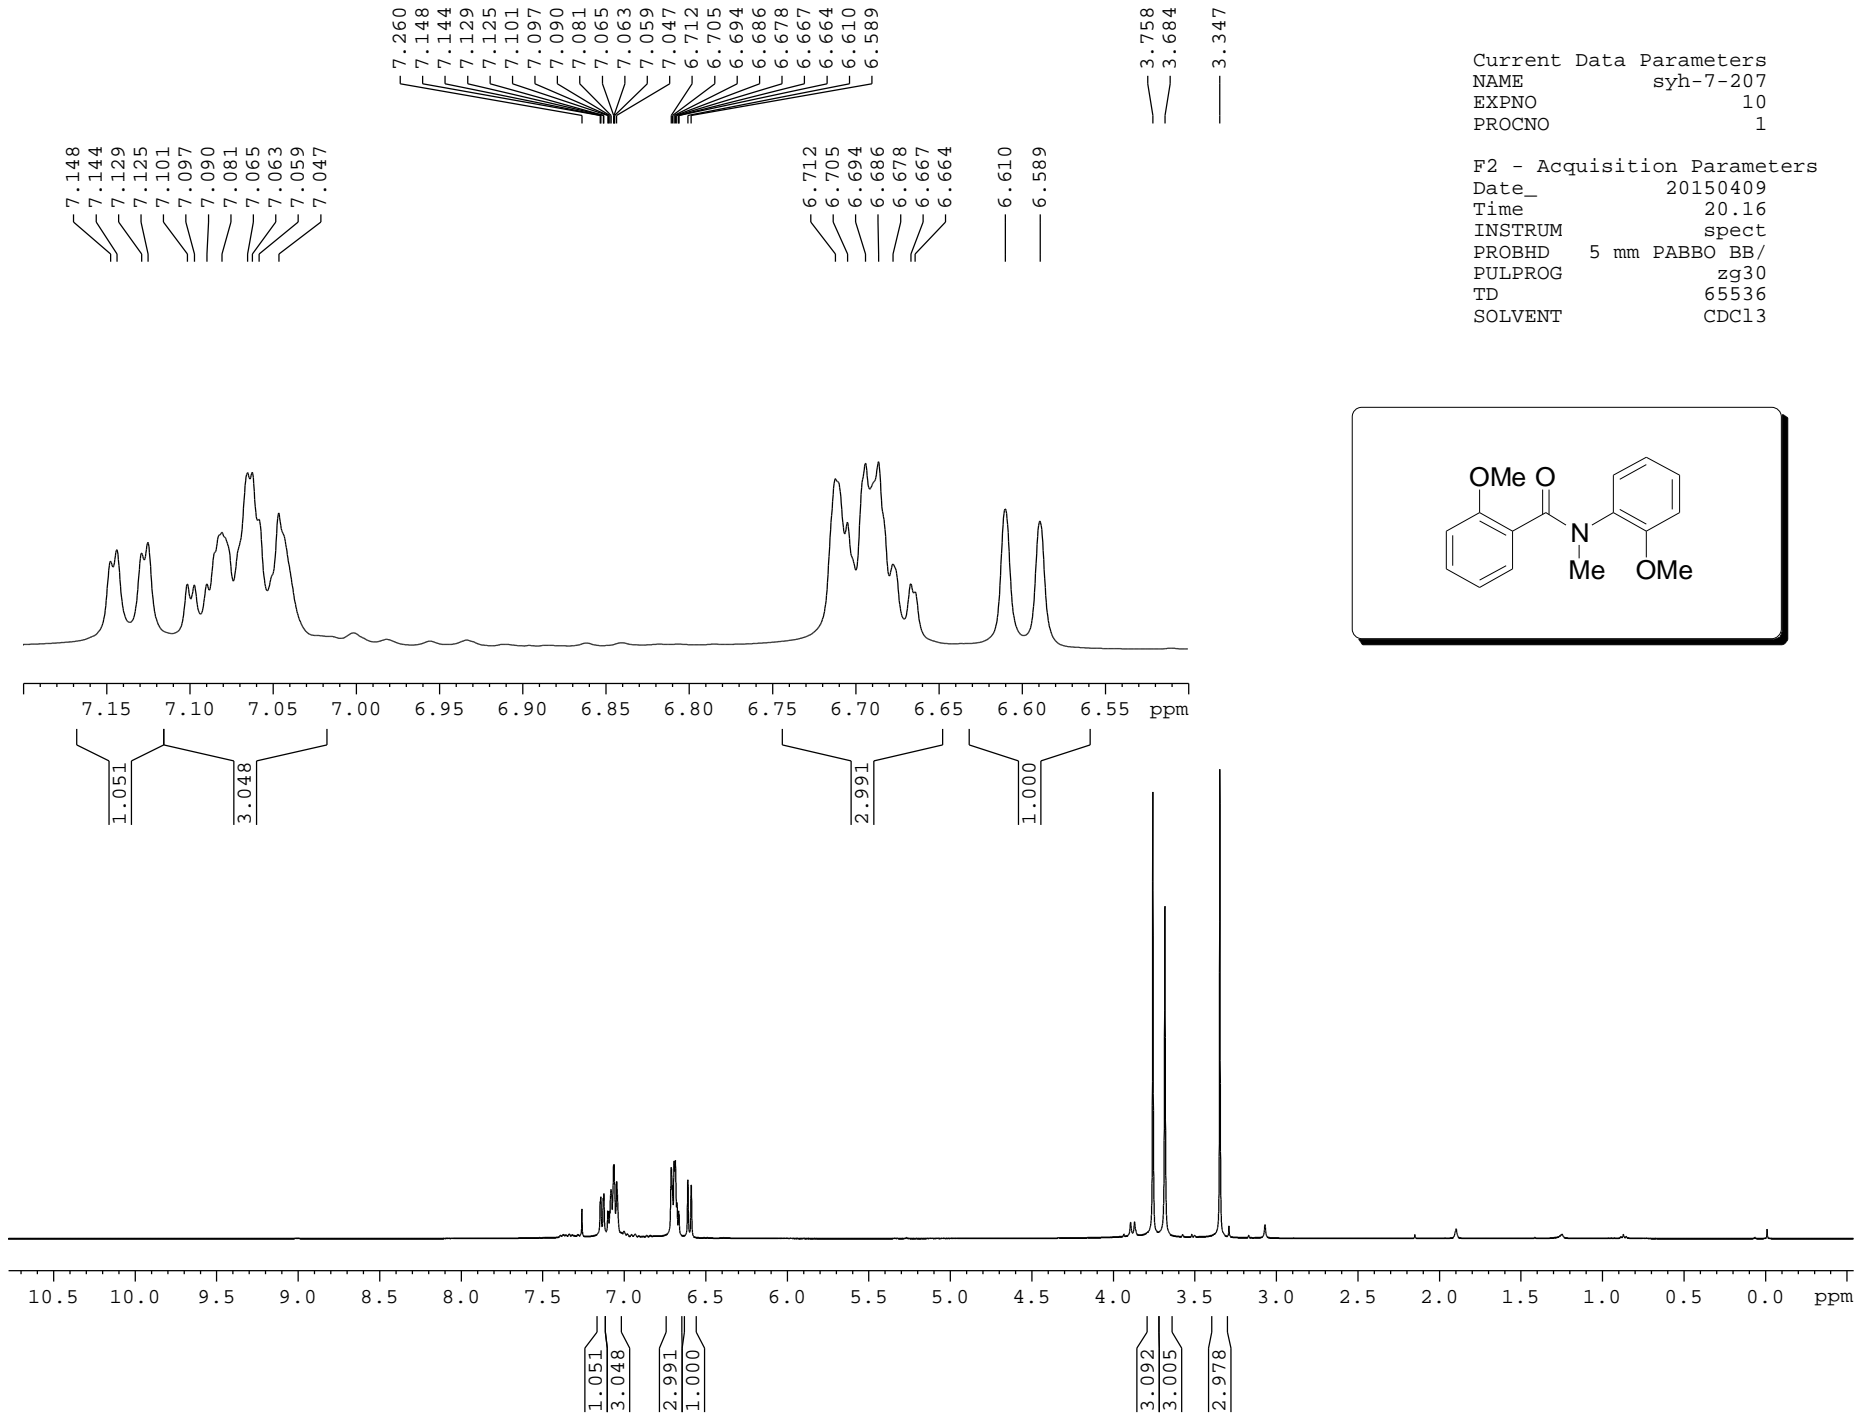

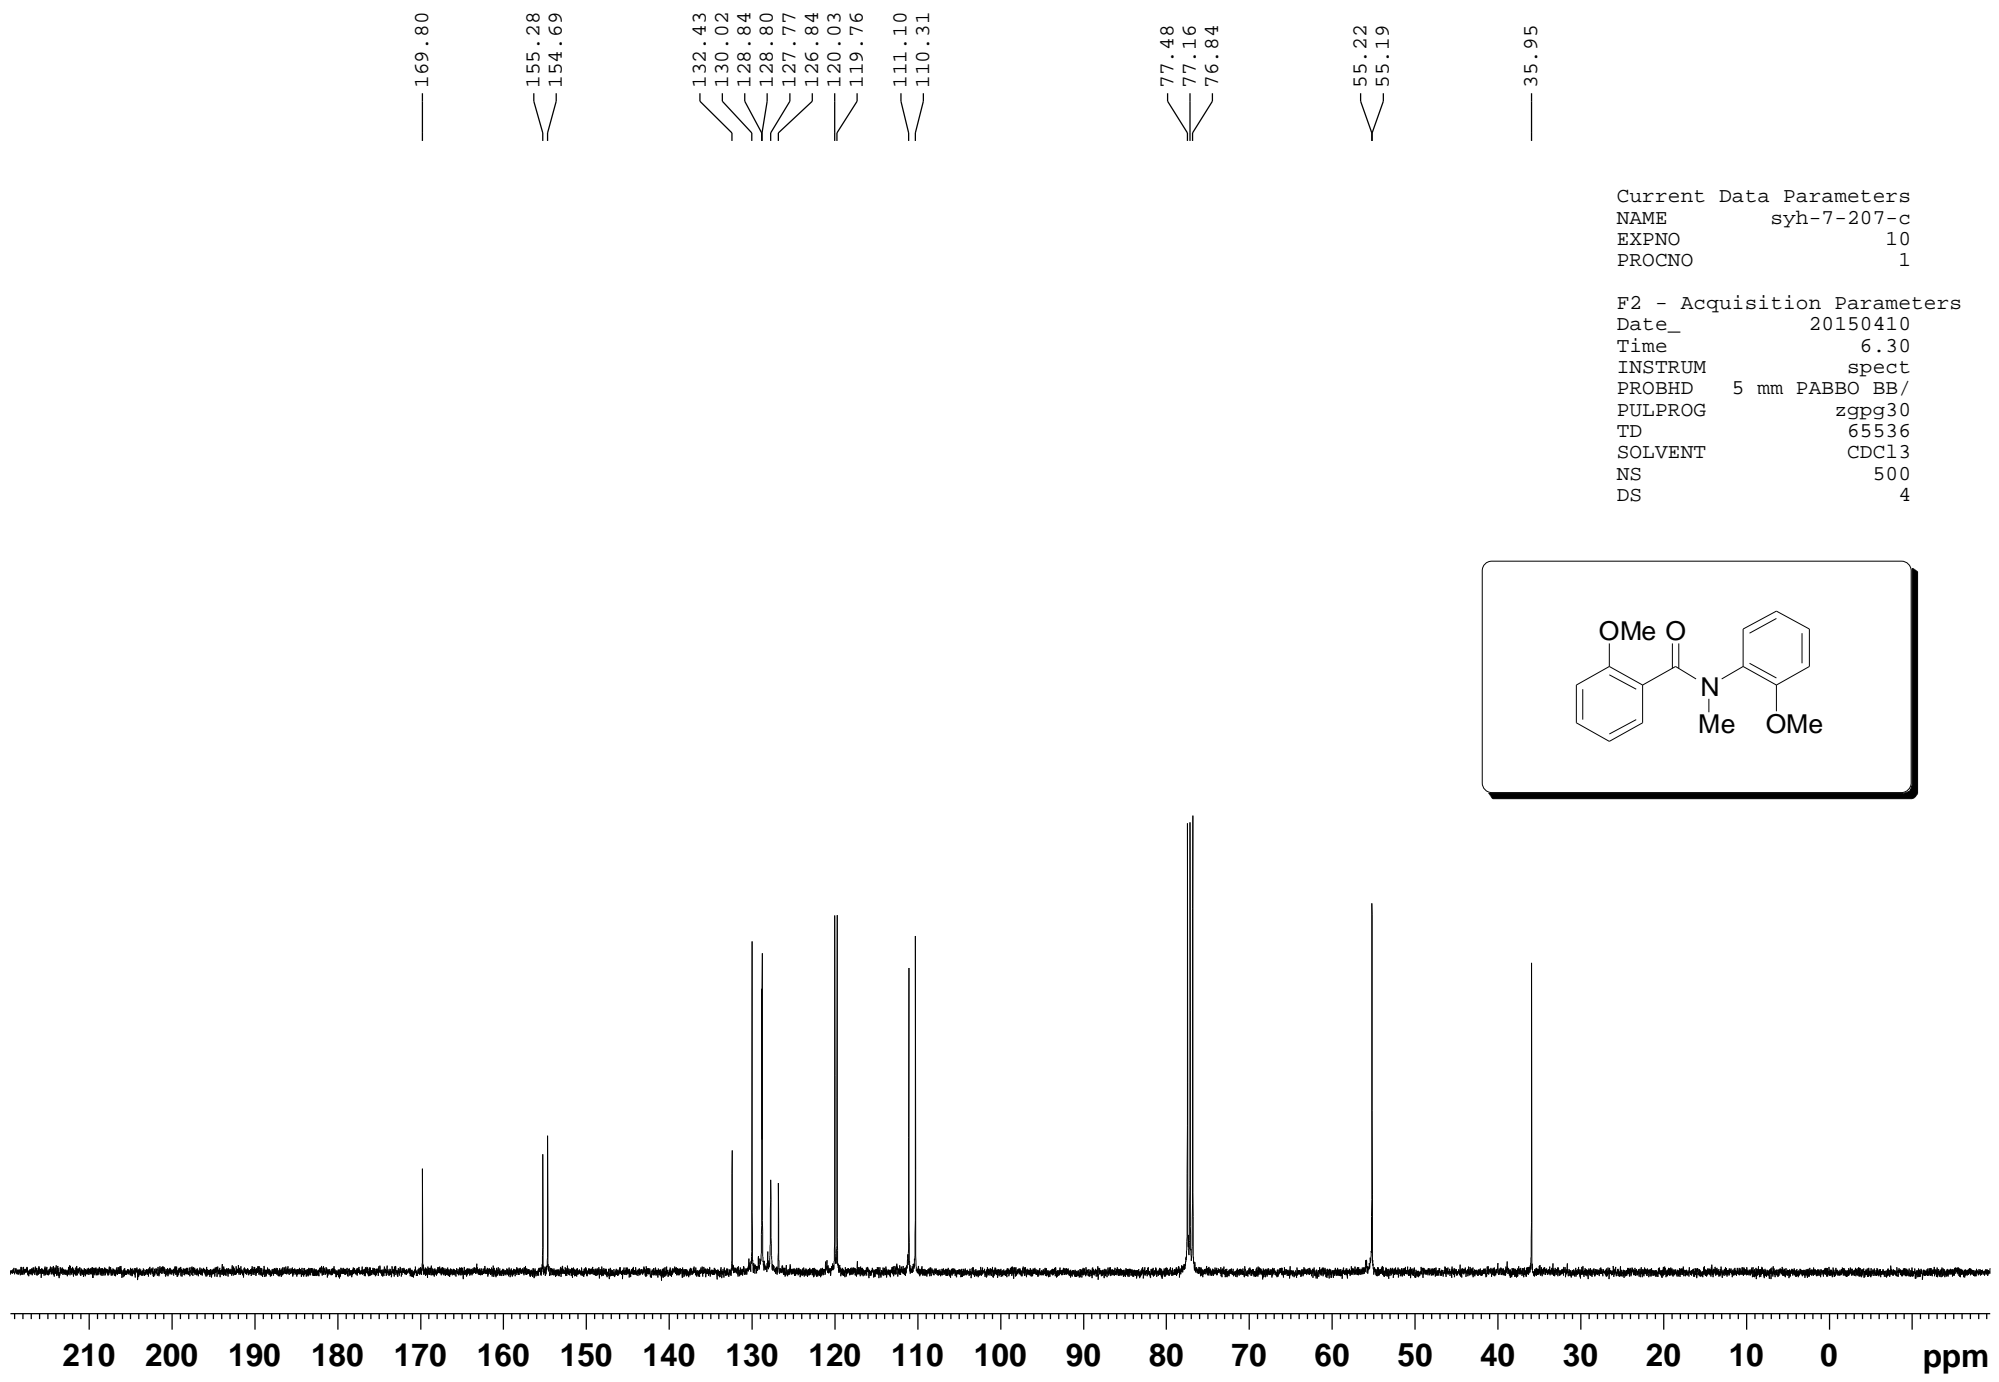

— 169.80  
 < 155.28  
   154.69  
 < 132.43  
   130.02  
   128.84  
   128.80  
   127.77  
   126.84  
   120.03  
   119.76  
 < 111.10  
   110.31  
 < 77.48  
   77.16  
   76.84  
 < 55.22  
   55.19  
 — 35.95

Current Data Parameters  
 NAME syh-7-207-c  
 EXPNO 10  
 PROCNO 1

F2 - Acquisition Parameters  
 Date\_ 20150410  
 Time 6.30  
 INSTRUM spect  
 PROBHD 5 mm PABBO BB/  
 PULPROG zgpg30  
 TD 65536  
 SOLVENT CDCl3  
 NS 500  
 DS 4

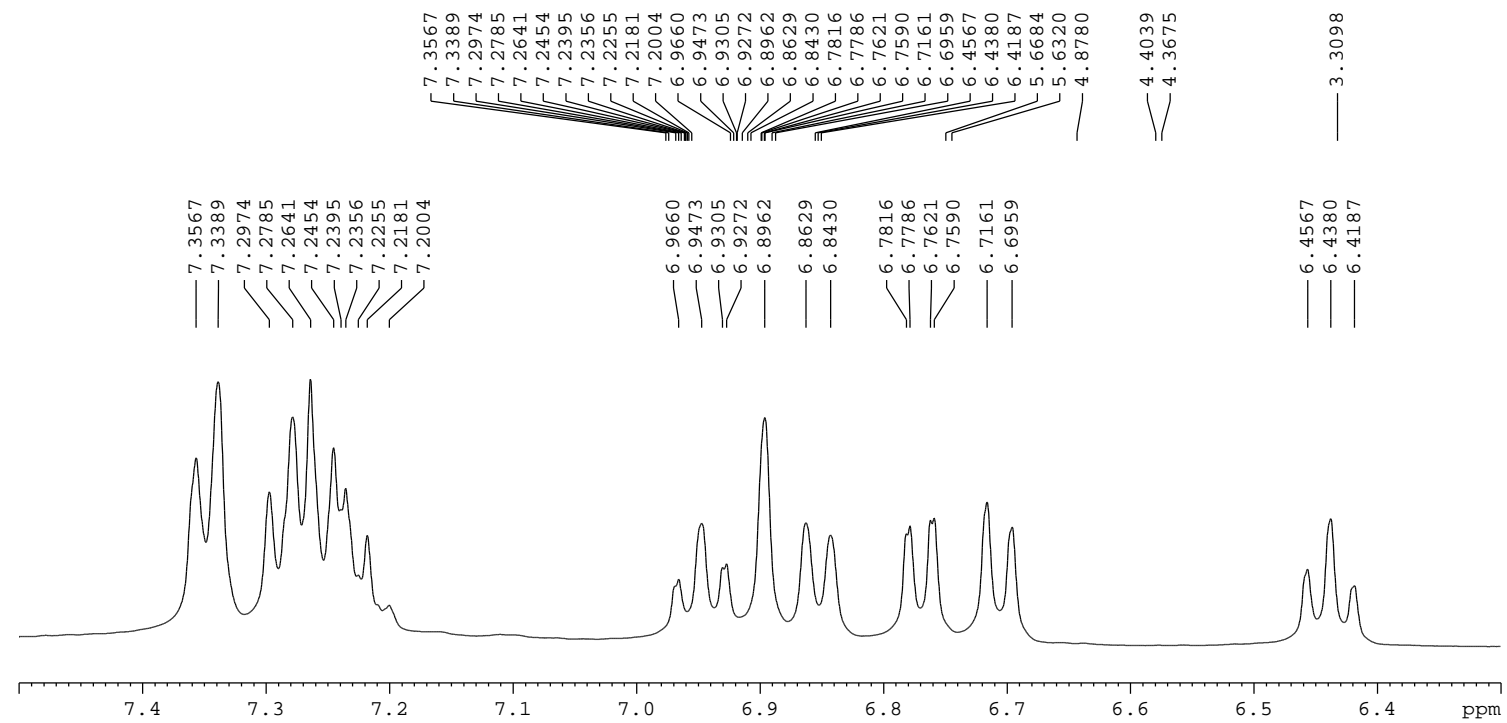

Current Data Parameters  
 NAME syh-7-261-hplc-p  
 EXPNO 10  
 PROCNO 1

F2 - Acquisition Parameters  
 Date\_ 20150519  
 Time 22.49  
 INSTRUM spect  
 PROBHD 5 mm PABBO BB-  
 PULPROG zg30  
 TD 65536  
 SOLVENT MeOD

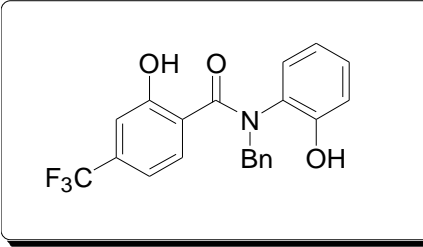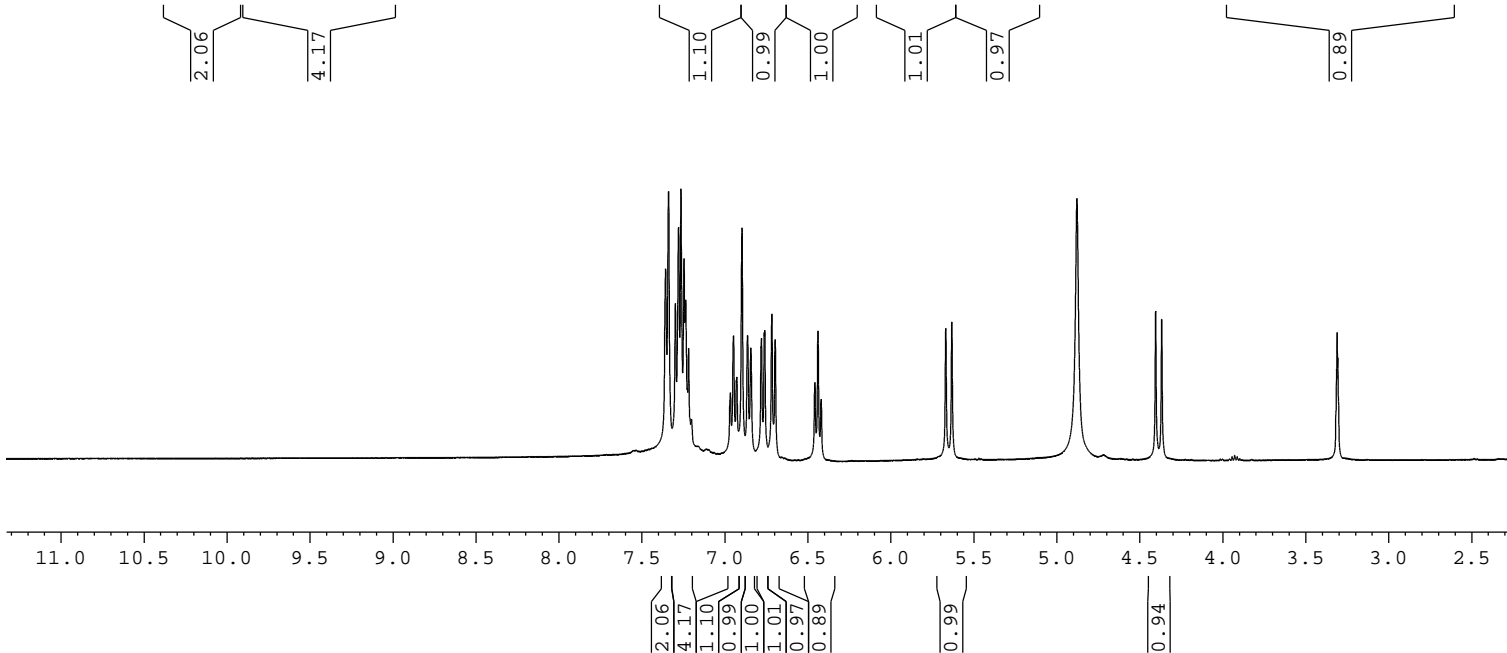

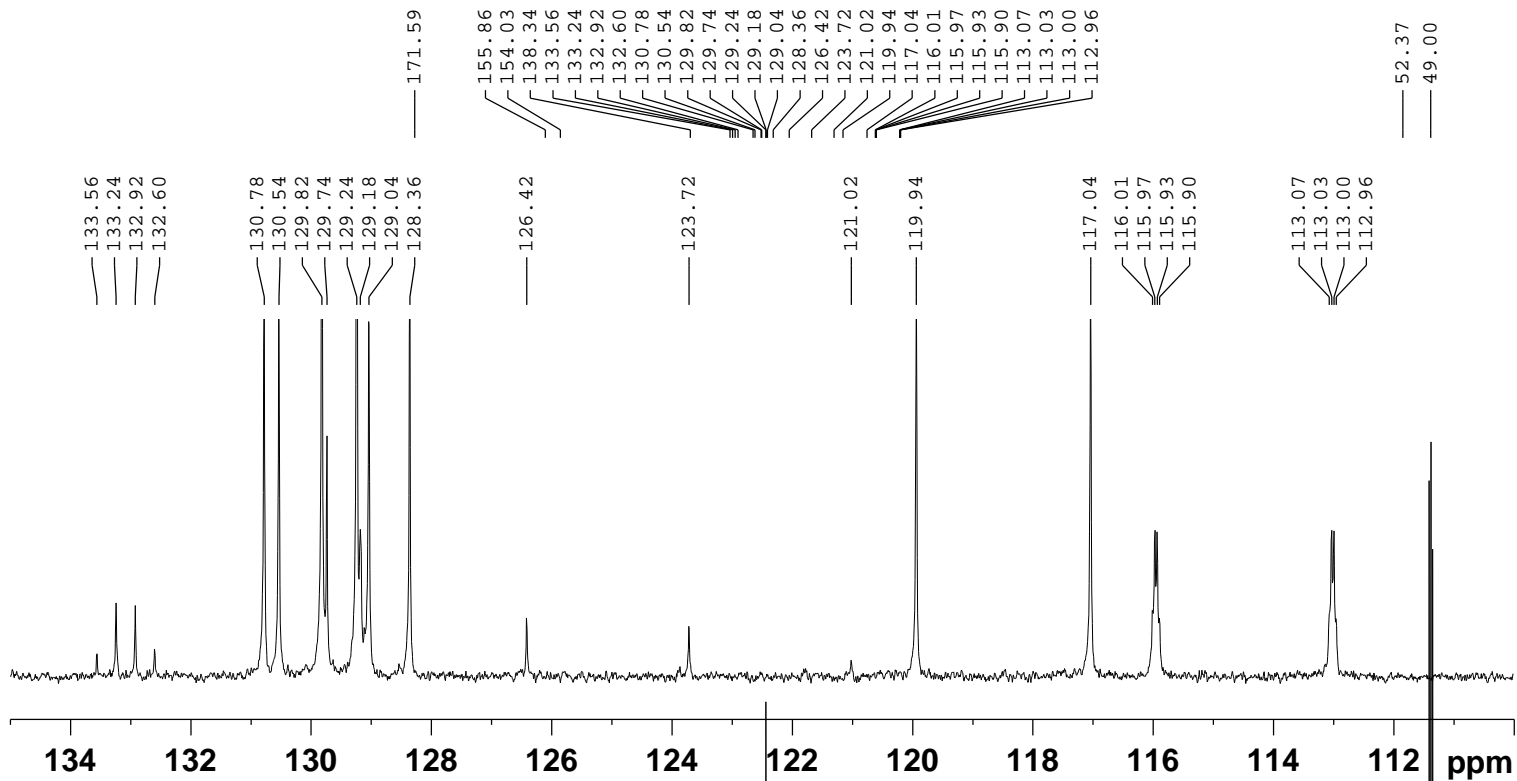

Current Data Parameters  
 NAME SYH-7-261-HPLC-C  
 EXPNO 10  
 PROCNO 1

F2 - Acquisition Parameters  
 Date\_ 20150521  
 Time 0.01  
 INSTRUM spect  
 PROBHD 5 mm PABBO BB/  
 PULPROG zgpg30  
 TD 65536

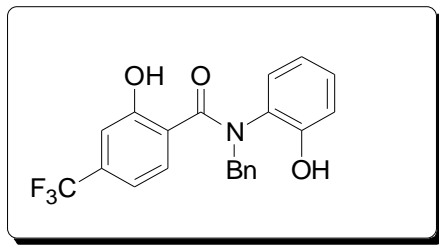

210 200 190 180 170 160 150 140 130 120 110 100 90 80 70 60 50 40 30 20 10 0 ppm

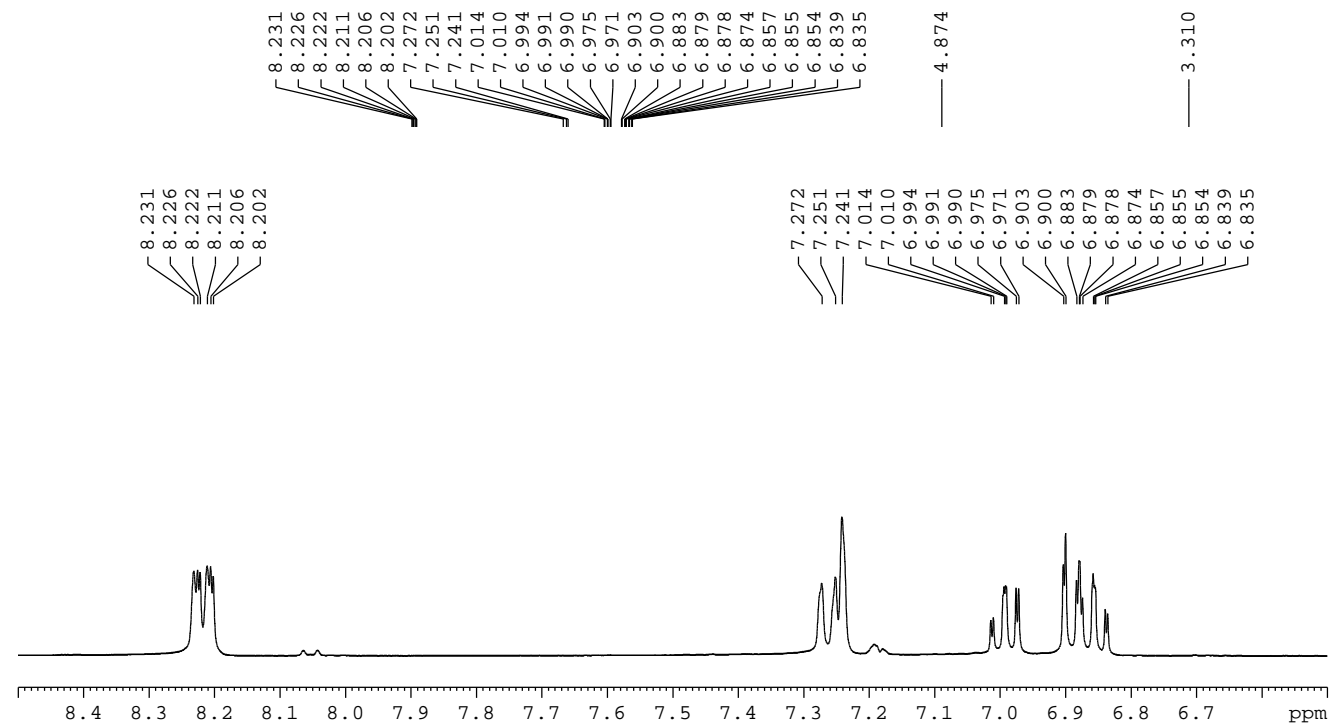

Current Data Parameters  
 NAME syh-7-299-hplc  
 EXPNO 10  
 PROCNO 1

F2 - Acquisition Parameters  
 Date\_ 20150530  
 Time 21.22  
 INSTRUM spect  
 PROBHD 5 mm PABBO BB/  
 PULPROG zg30  
 TD 65536  
 SOLVENT MeOD

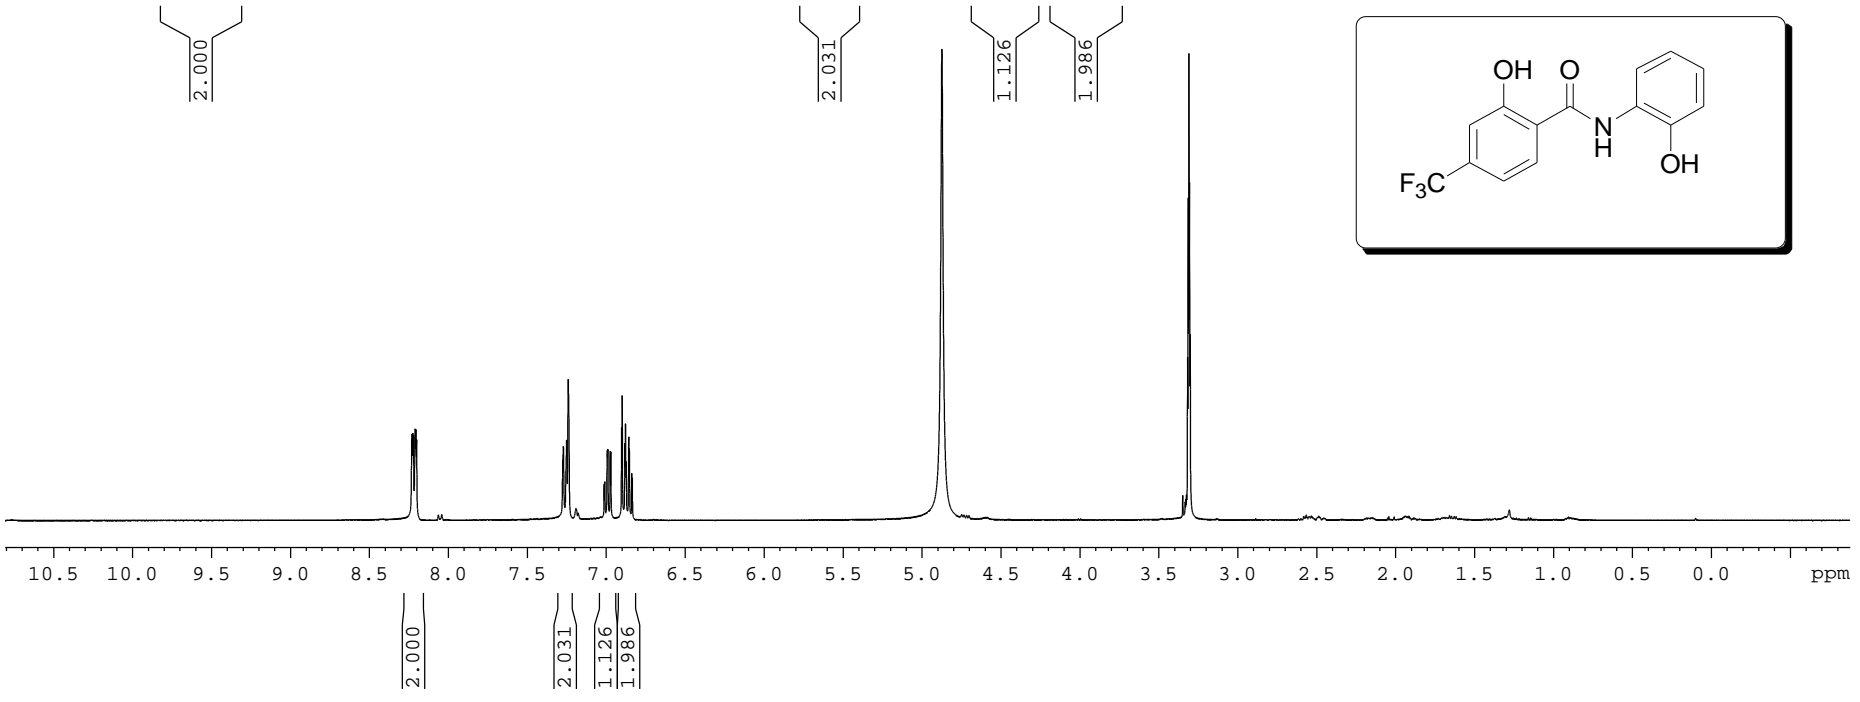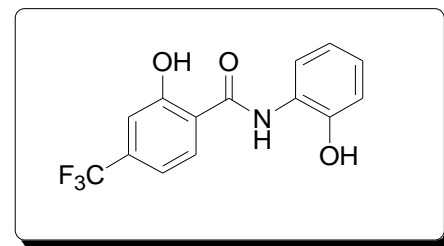

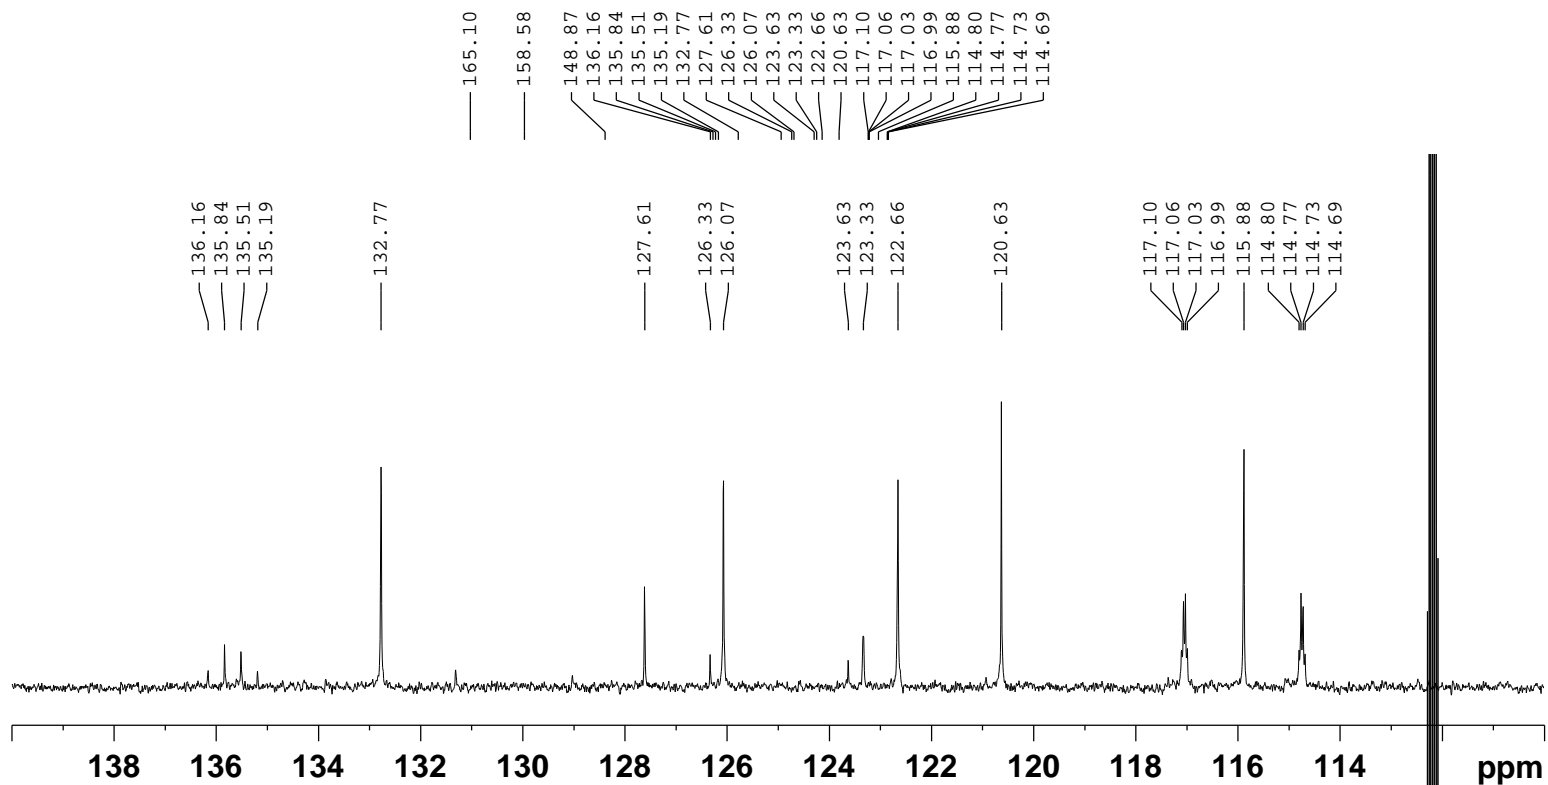

Current Data Parameters  
 NAME syh-7-299-hplc-c  
 EXPNO 10  
 PROCNO 1

F2 - Acquisition Parameters  
 Date\_ 20150531  
 Time 15.00  
 INSTRUM spect  
 PROBHD 5 mm PABBO BB/  
 PULPROG zgpg30  
 TD 65536  
 SOLVENT MeOD  
 NS 3100  
 DS 4

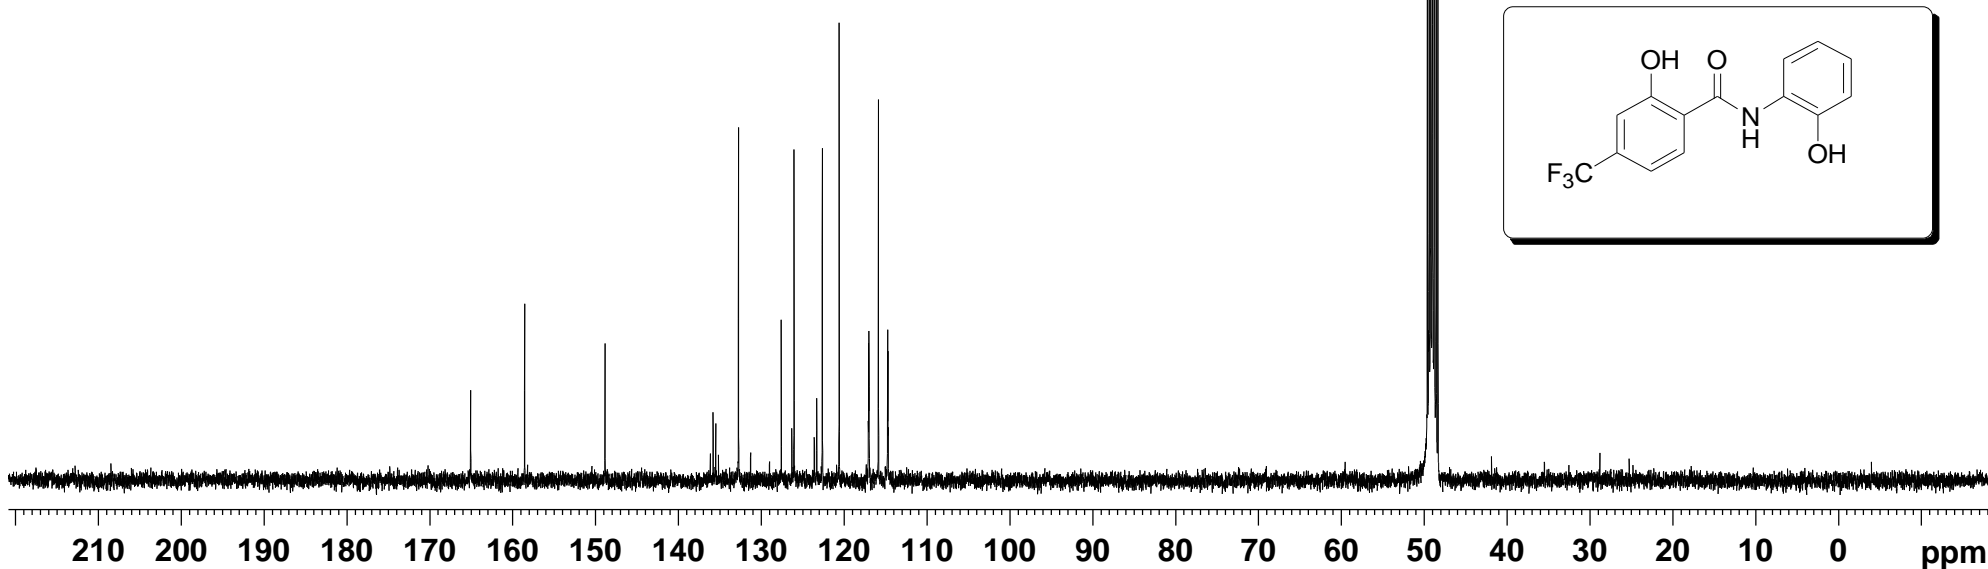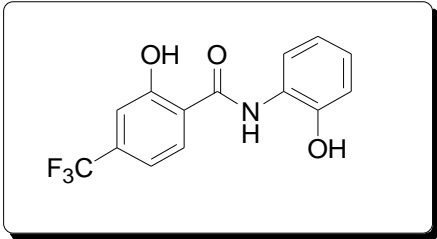

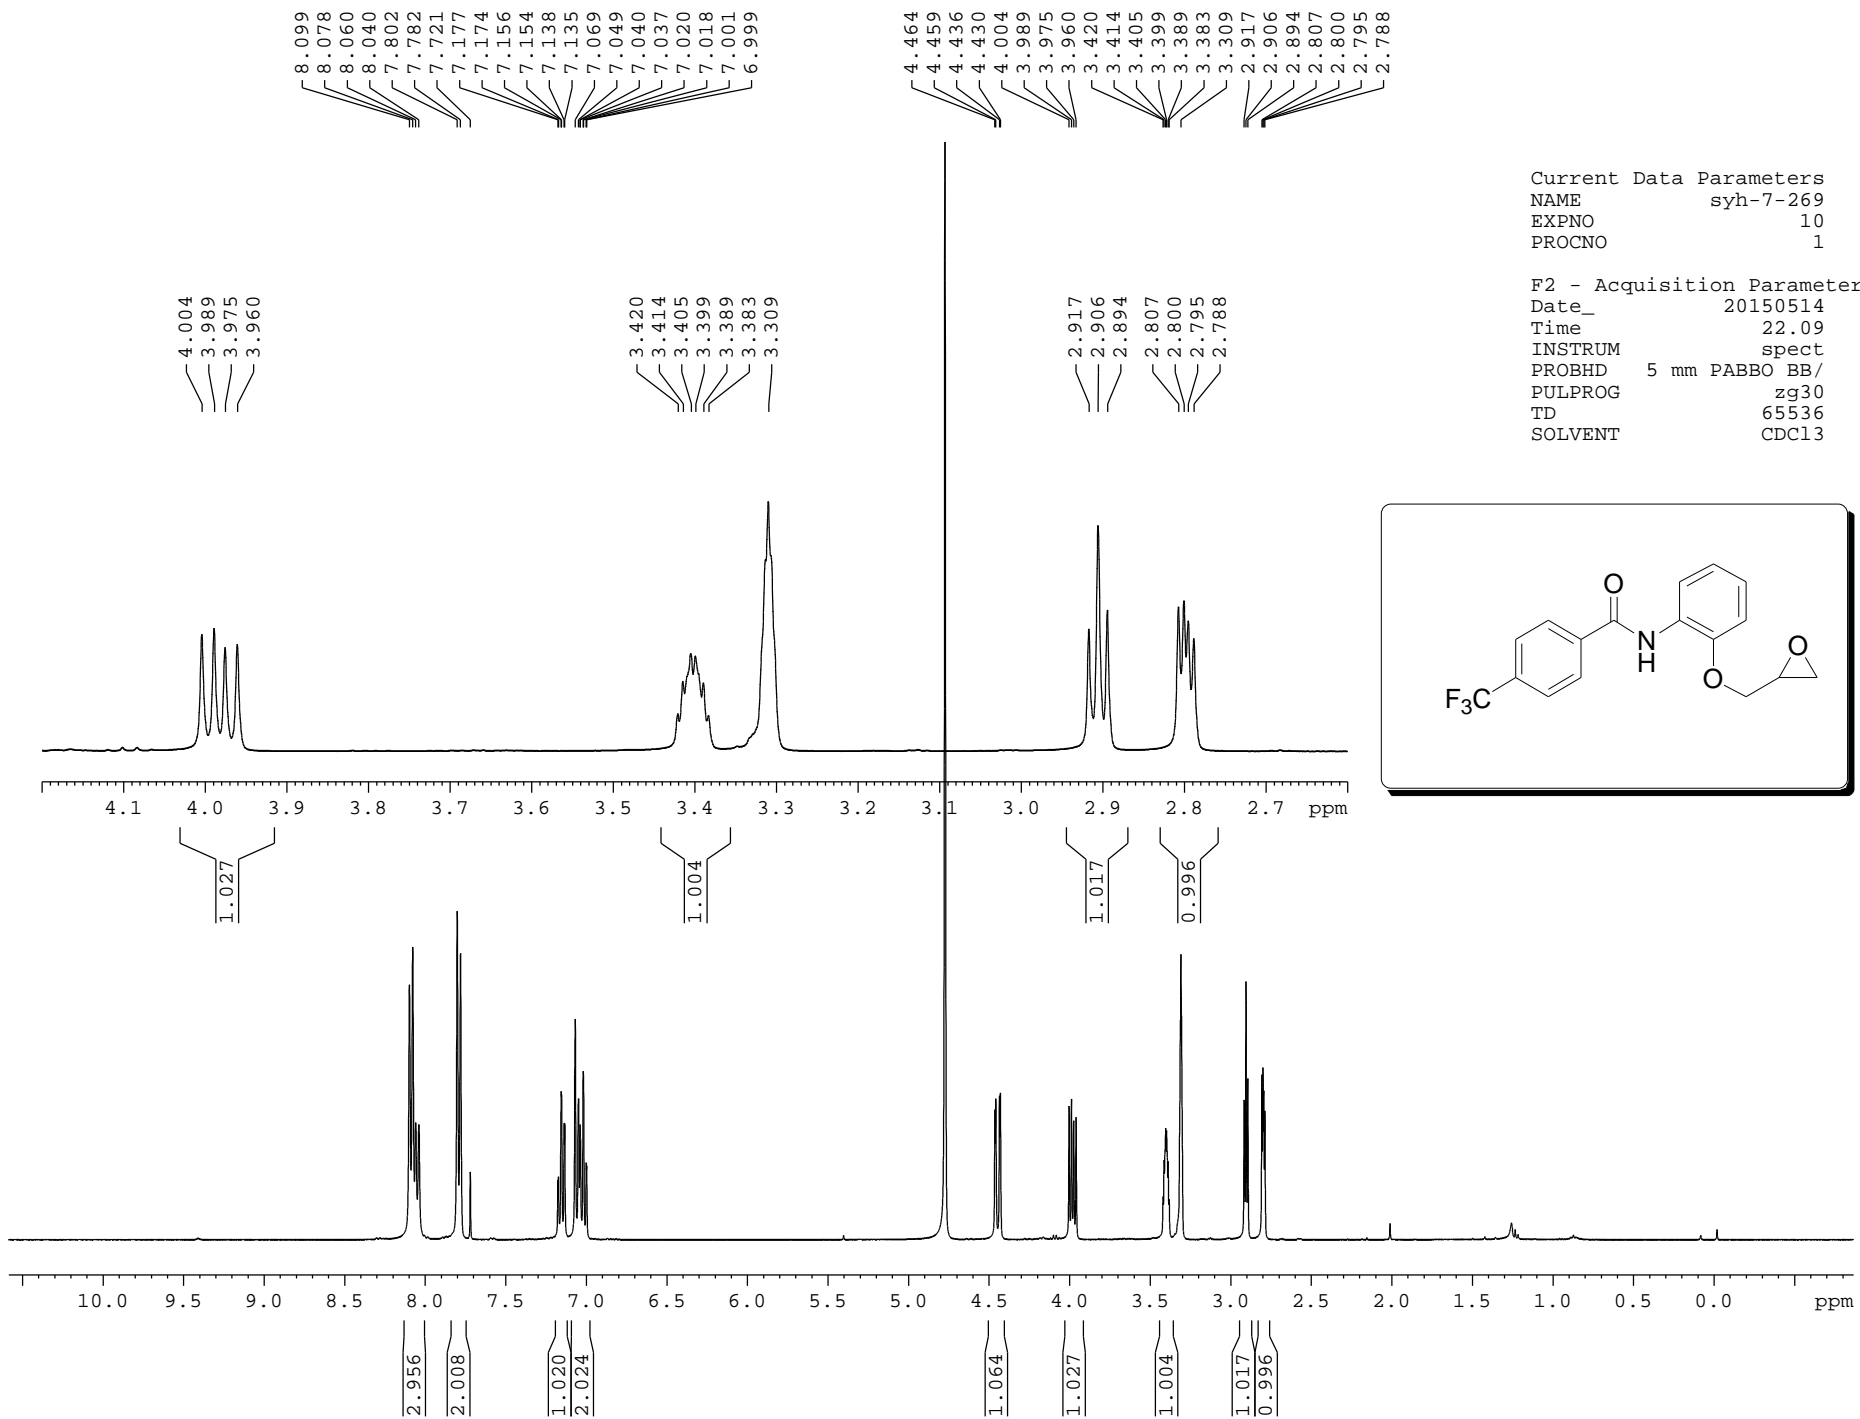

Current Data Parameters  
 NAME syh-7-269  
 EXPNO 10  
 PROCNO 1

F2 - Acquisition Parameters  
 Date\_ 20150514  
 Time 22.09  
 INSTRUM spect  
 PROBHD 5 mm PABBO BB/  
 PULPROG zg30  
 TD 65536  
 SOLVENT CDC13



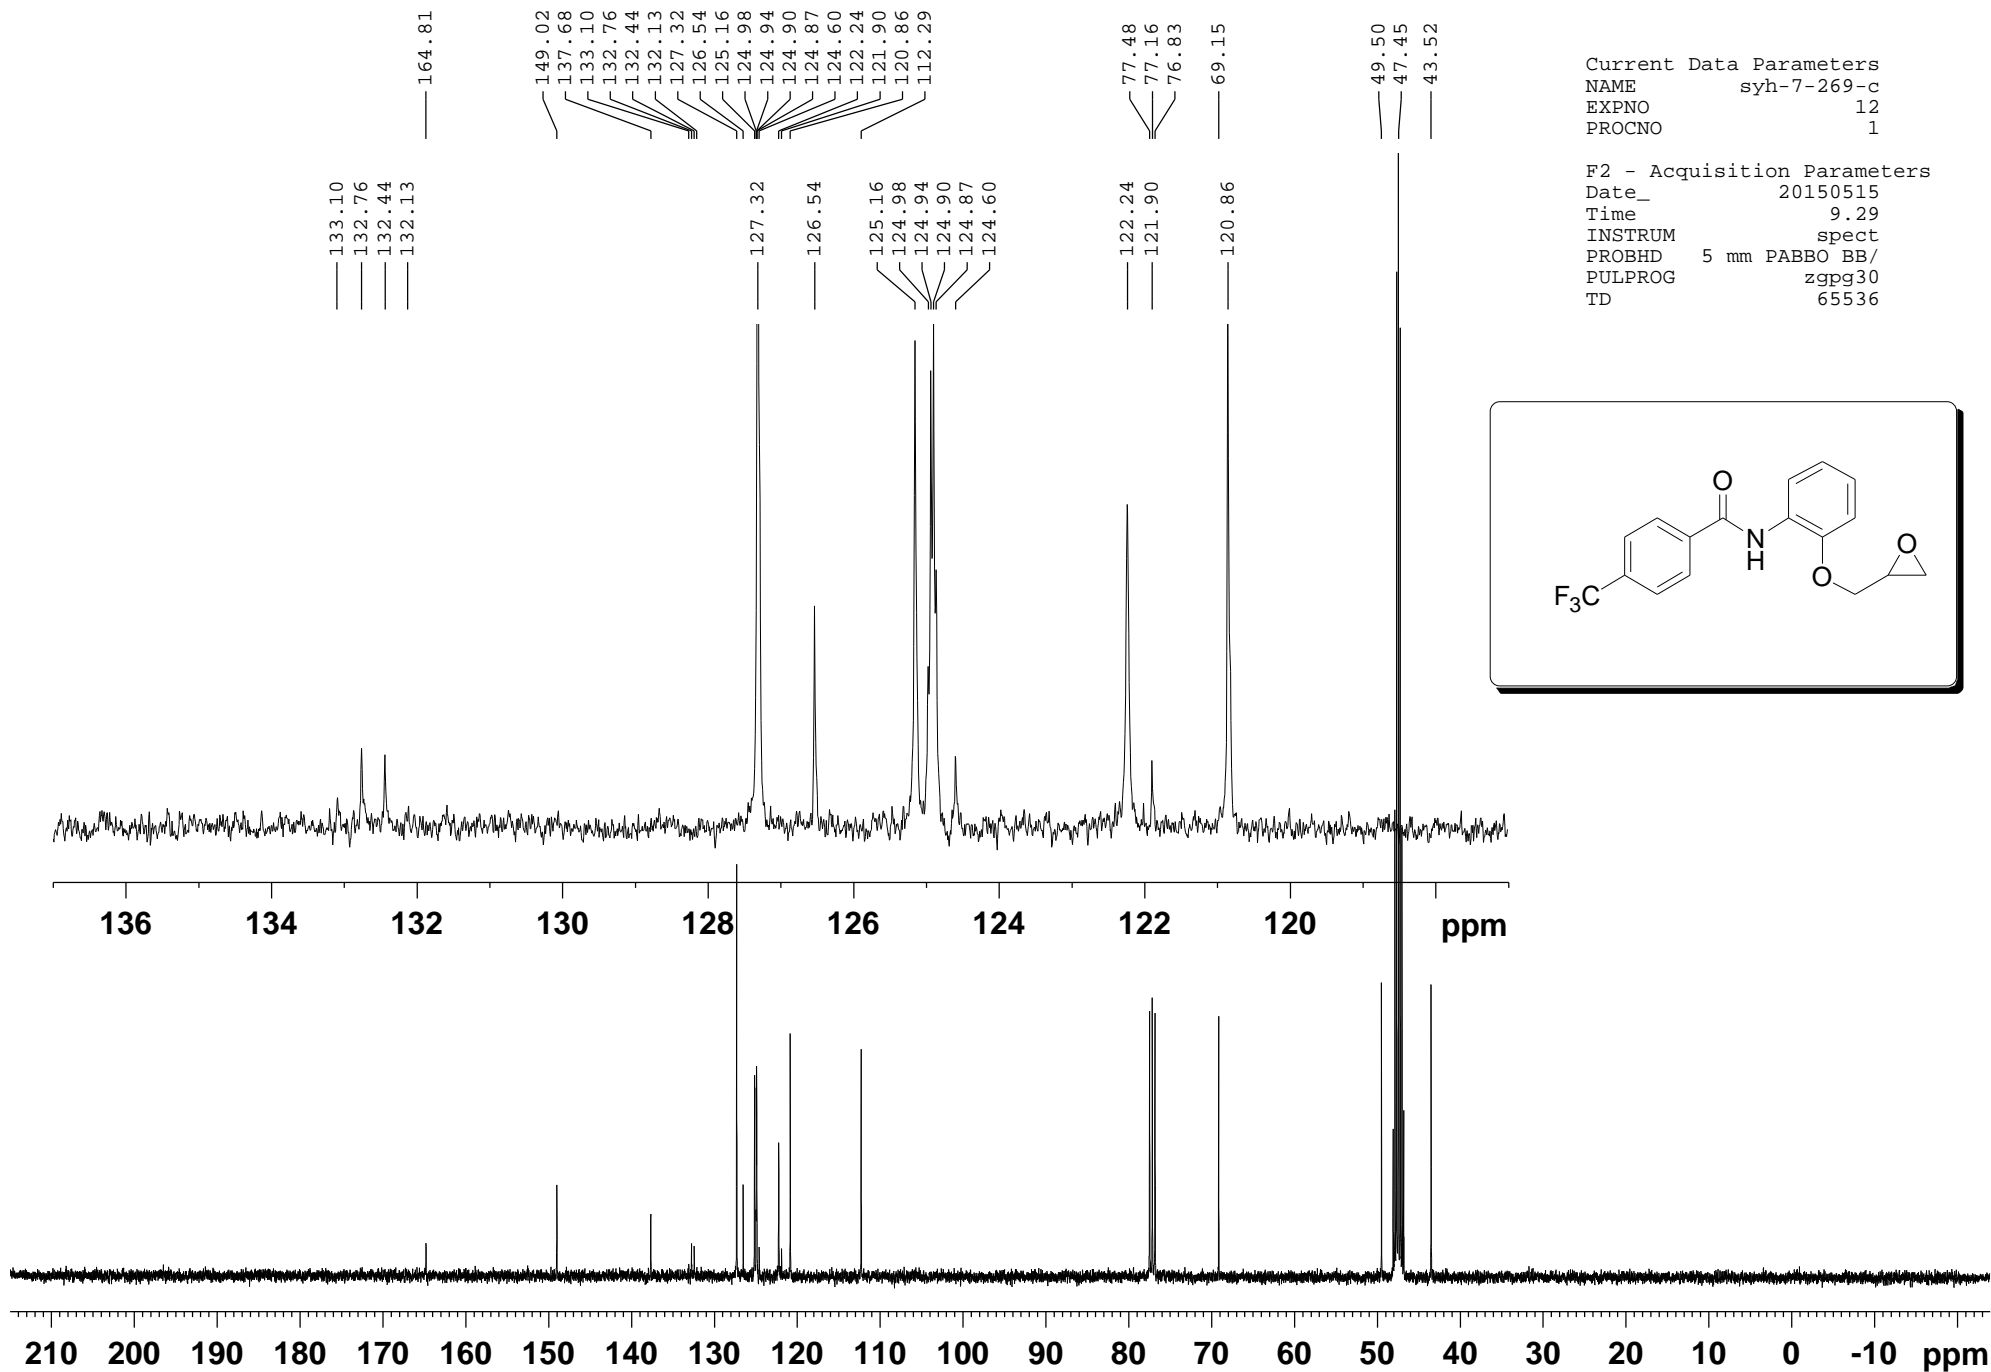

8.382  
8.362  
7.825  
7.818  
7.816  
7.813  
7.805  
7.804  
7.796  
7.795  
7.776  
7.632  
7.623  
7.621  
7.616  
7.612  
7.610  
7.603  
7.599  
7.598  
7.590  
7.428  
7.423  
7.410  
7.406  
7.405  
7.396  
7.388  
7.386  
7.383  
7.370  
7.365  
7.260

8.382  
8.362

7.825  
7.818  
7.816  
7.813  
7.805  
7.804  
7.796  
7.795  
7.776  
7.632  
7.623  
7.621  
7.616  
7.612  
7.610  
7.603  
7.599  
7.598  
7.590  
7.428  
7.423  
7.410  
7.406  
7.405  
7.396  
7.388  
7.386  
7.383  
7.370  
7.365  
7.260

Current Data Parameters  
NAME syh-7-285  
EXPNO 10  
PROCNO 1

F2 - Acquisition Parameters  
Date\_ 20150519  
Time 18.28  
INSTRUM spect  
PROBHD 5 mm PABBO BB/  
PULPROG zg30  
TD 65536  
SOLVENT CDC13

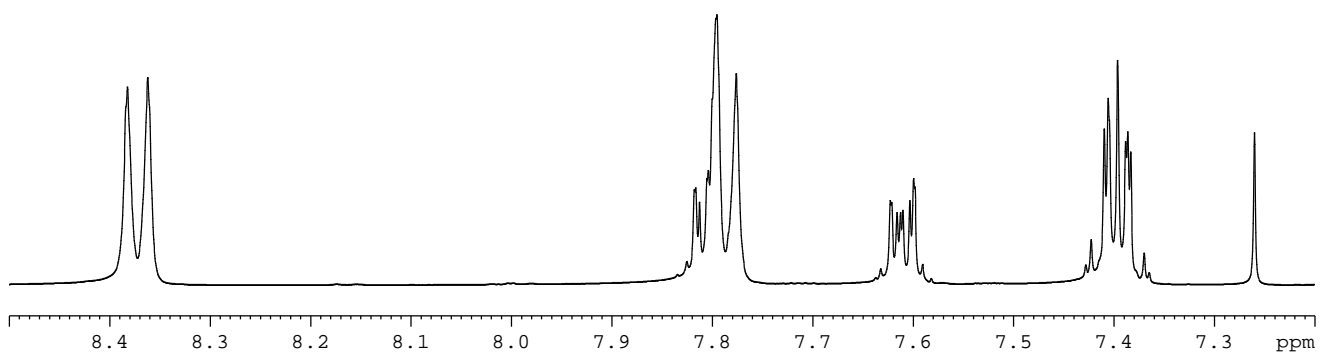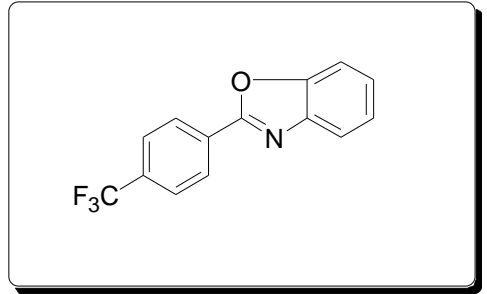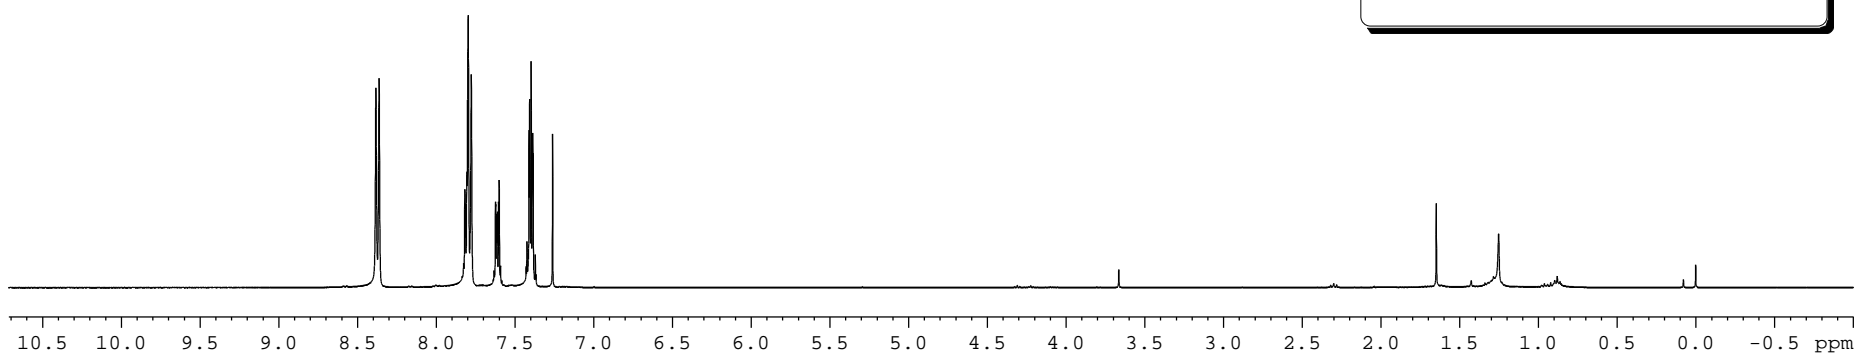



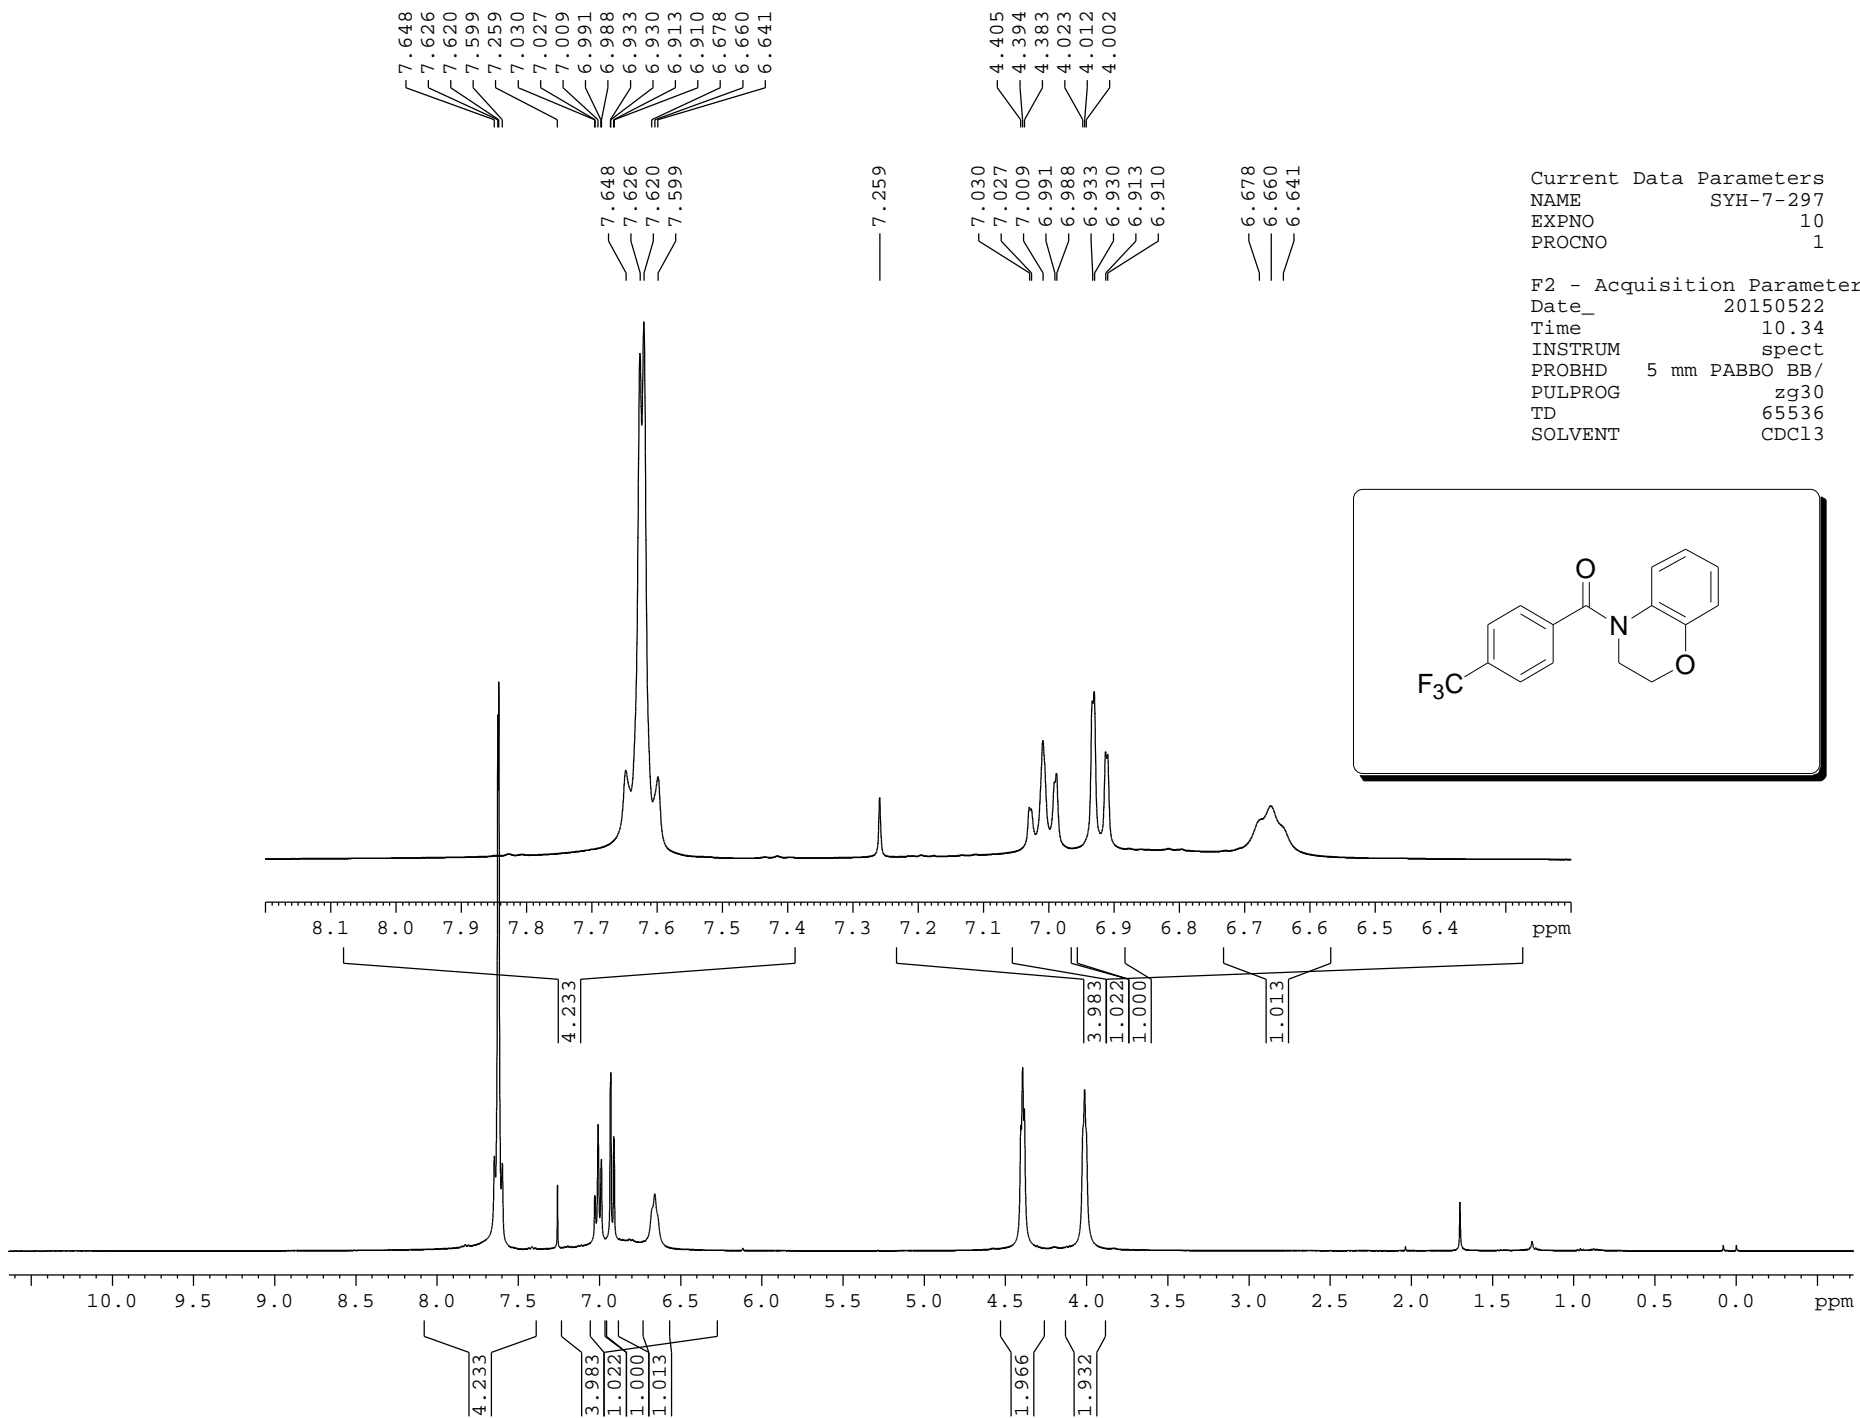

Current Data Parameters  
 NAME SYH-7-297  
 EXPNO 10  
 PROCNO 1

F2 - Acquisition Parameters  
 Date\_ 20150522  
 Time 10.34  
 INSTRUM spect  
 PROBHD 5 mm PABBO BB/  
 PULPROG zg30  
 TD 65536  
 SOLVENT CDC13

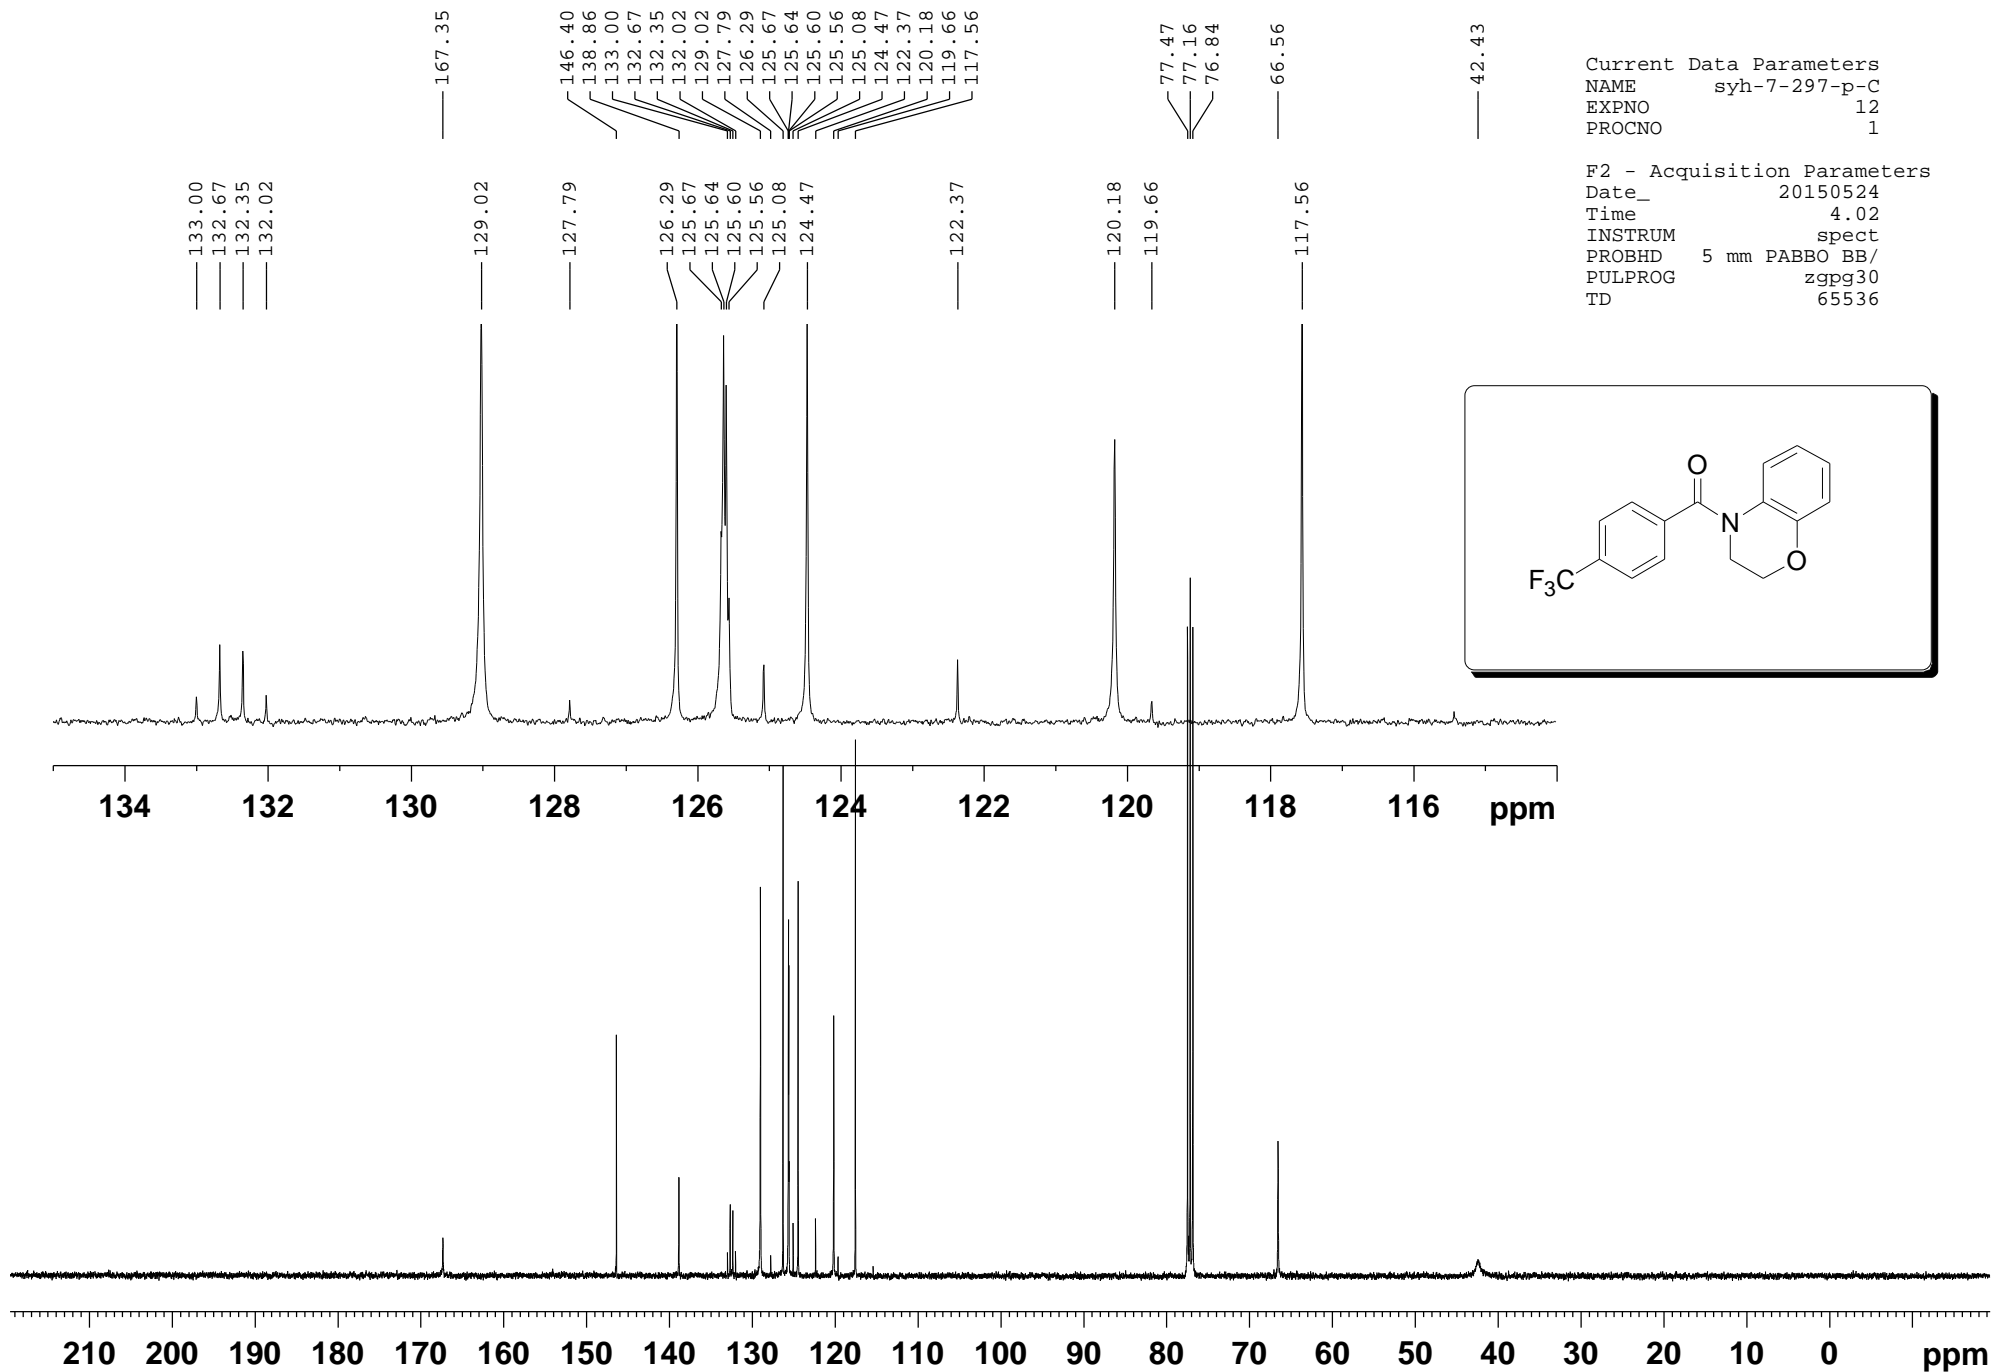

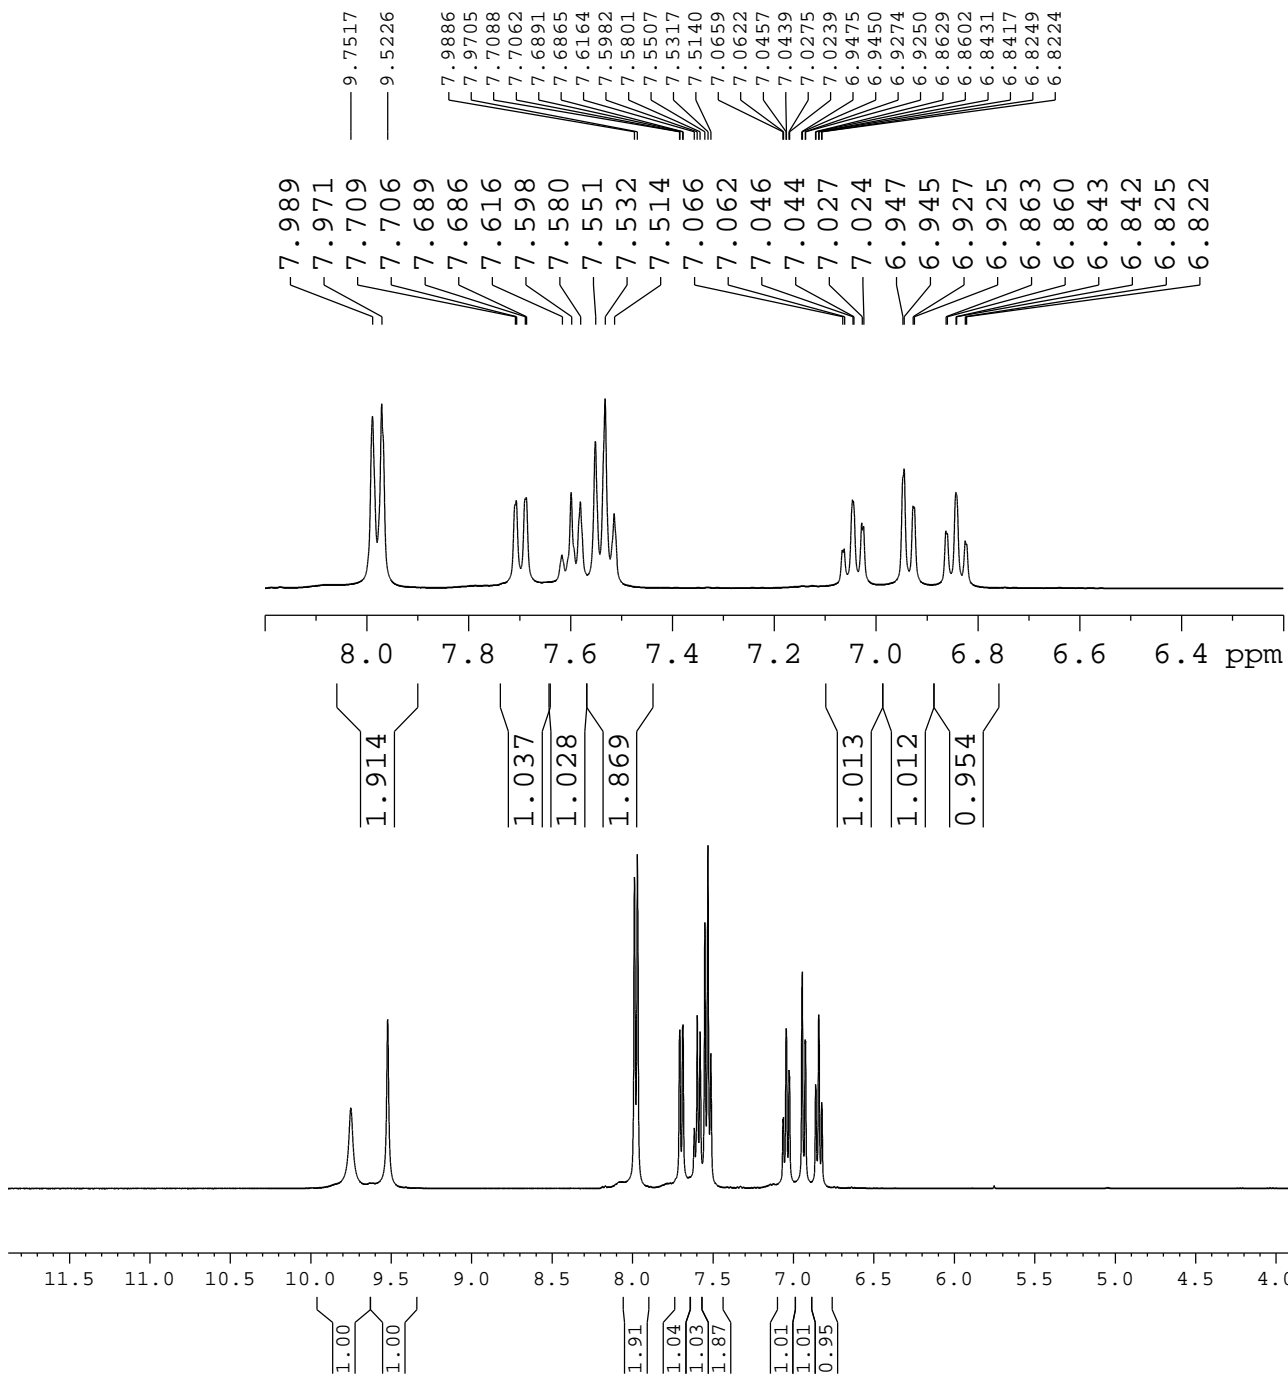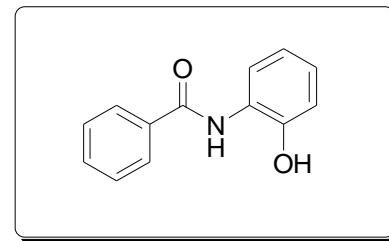

Current Data Parameters  
 NAME syh-6-203  
 EXPNO 10  
 PROCNO 1

3.3643

2.4997

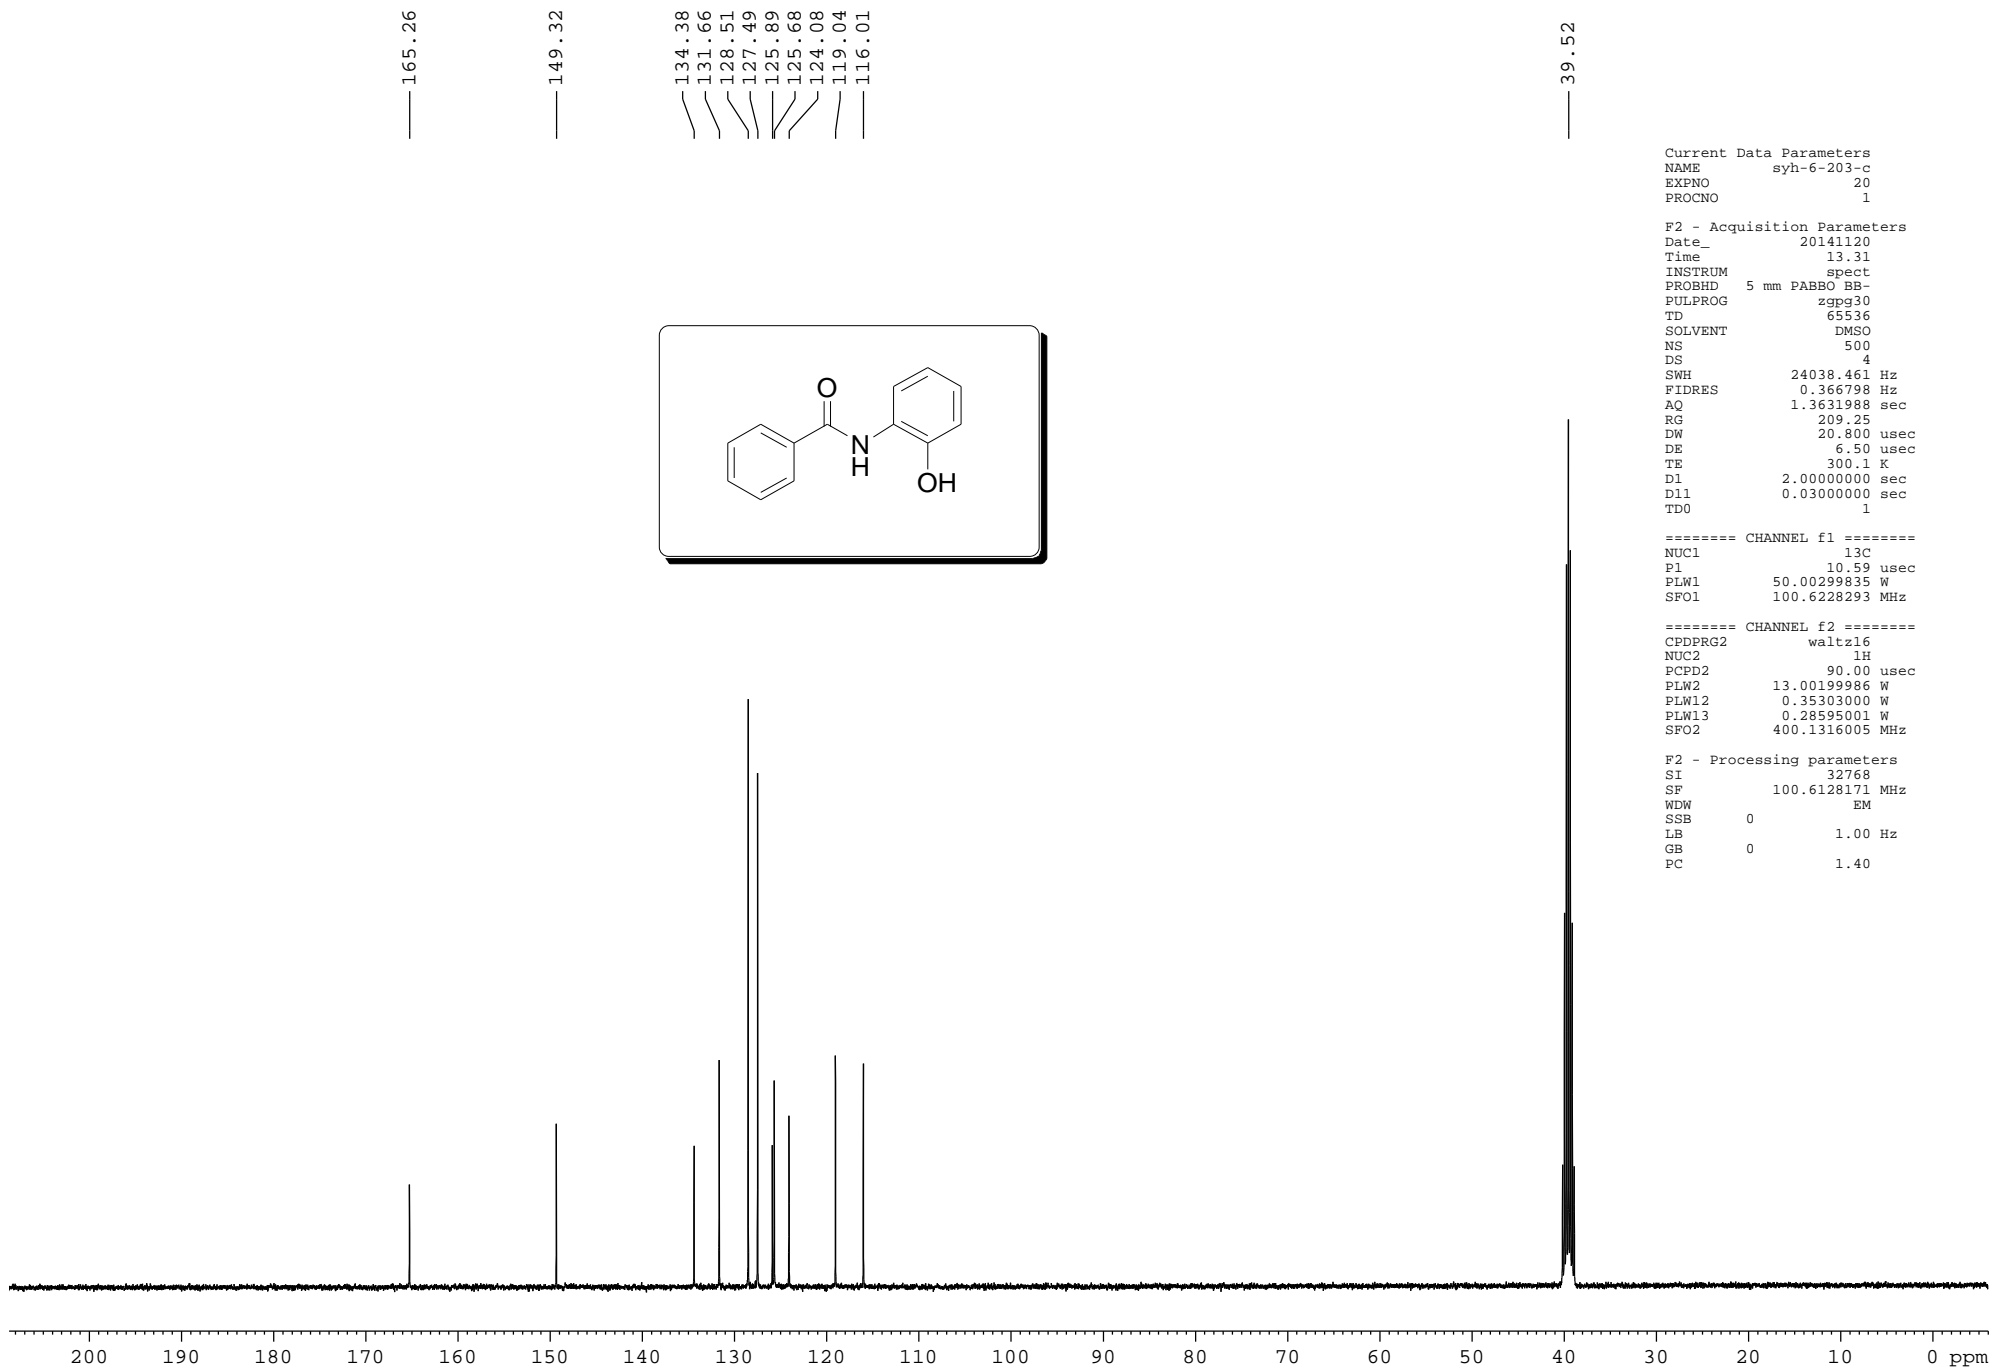

Current Data Parameters  
 NAME syh-6-203-c  
 EXPNO 20  
 PROCNO 1

F2 - Acquisition Parameters  
 Date\_ 20141120  
 Time 13.31  
 INSTRUM spect  
 PROBHD 5 mm PABBO BB-  
 PULPROG zgpg30  
 TD 65536  
 SOLVENT DMSO  
 NS 500  
 DS 4  
 SWH 24038.461 Hz  
 FIDRES 0.366798 Hz  
 AQ 1.3631988 sec  
 RG 209.25  
 DW 20.800 usec  
 DE 6.50 usec  
 TE 300.1 K  
 D1 2.0000000 sec  
 D11 0.03000000 sec  
 TD0 1

==== CHANNEL f1 =====  
 NUC1 13C  
 P1 10.59 usec  
 PLW1 50.00299835 W  
 SFO1 100.6228293 MHz

==== CHANNEL f2 =====  
 CPDPRG2 waltz16  
 NUC2 1H  
 PCPD2 90.00 usec  
 PLW2 13.00199986 W  
 PLW12 0.35303000 W  
 PLW13 0.28595001 W  
 SFO2 400.1316005 MHz

F2 - Processing parameters  
 SI 32768  
 SF 100.6128171 MHz  
 WDW EM  
 SSB 0  
 LB 1.00 Hz  
 GB 0  
 PC 1.40

Current Data Parameters  
NAME syh-6-203-hmhc

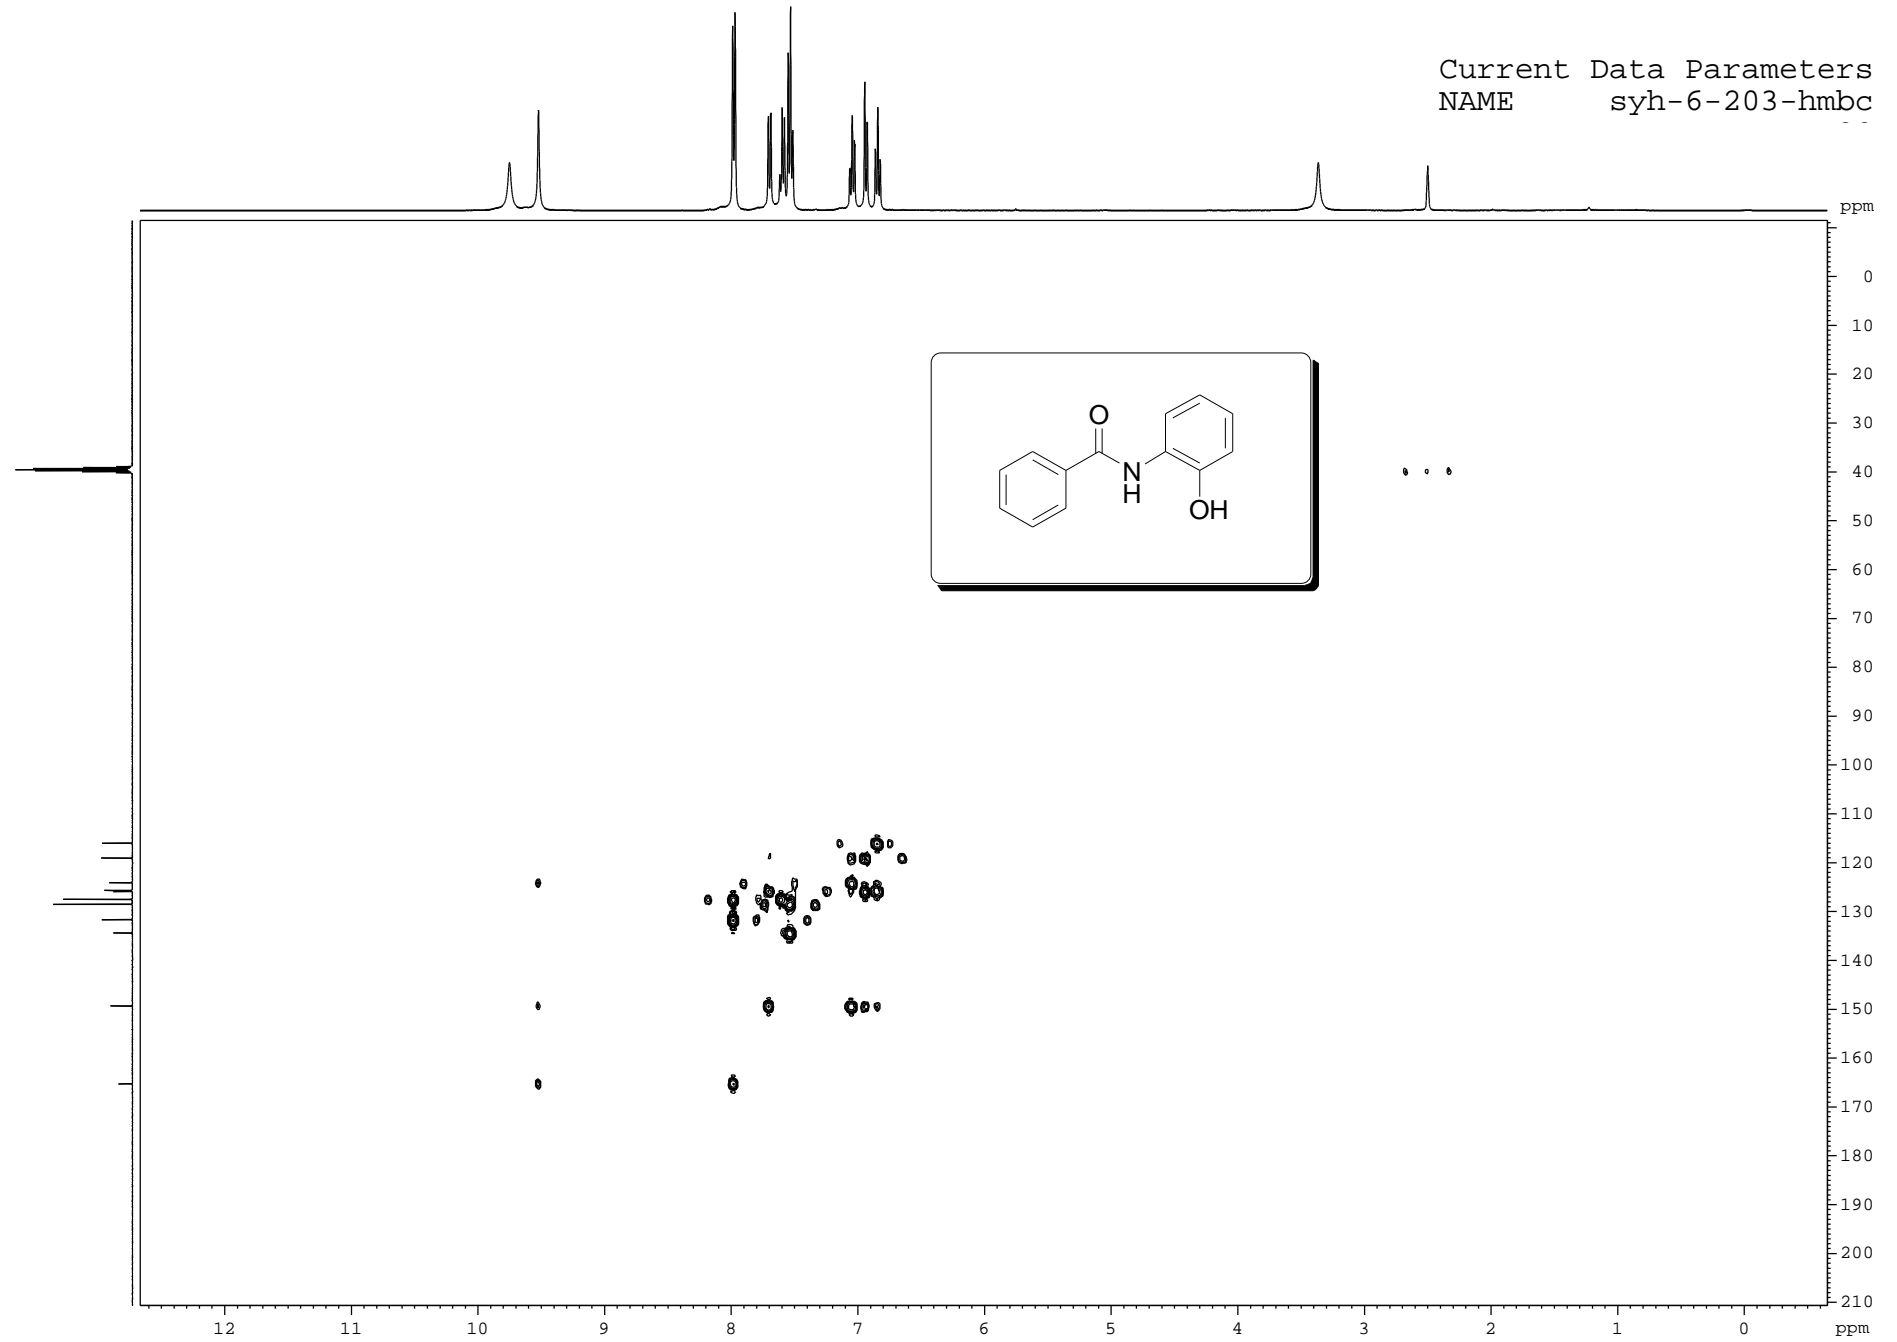



Current Data Parameters  
 NAME syh-6-185  
 EXPNO 10  
 PROCNO 1

F2 - Acquisition Parameters

Date\_ 20141112  
 Time 22.10  
 INSTRUM spect  
 PROBHD 5 mm PABBO BB/  
 PULPROG zg30  
 TD 65536  
 SOLVENT DMSO

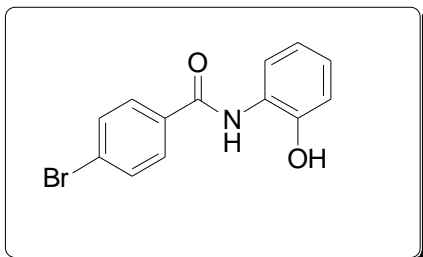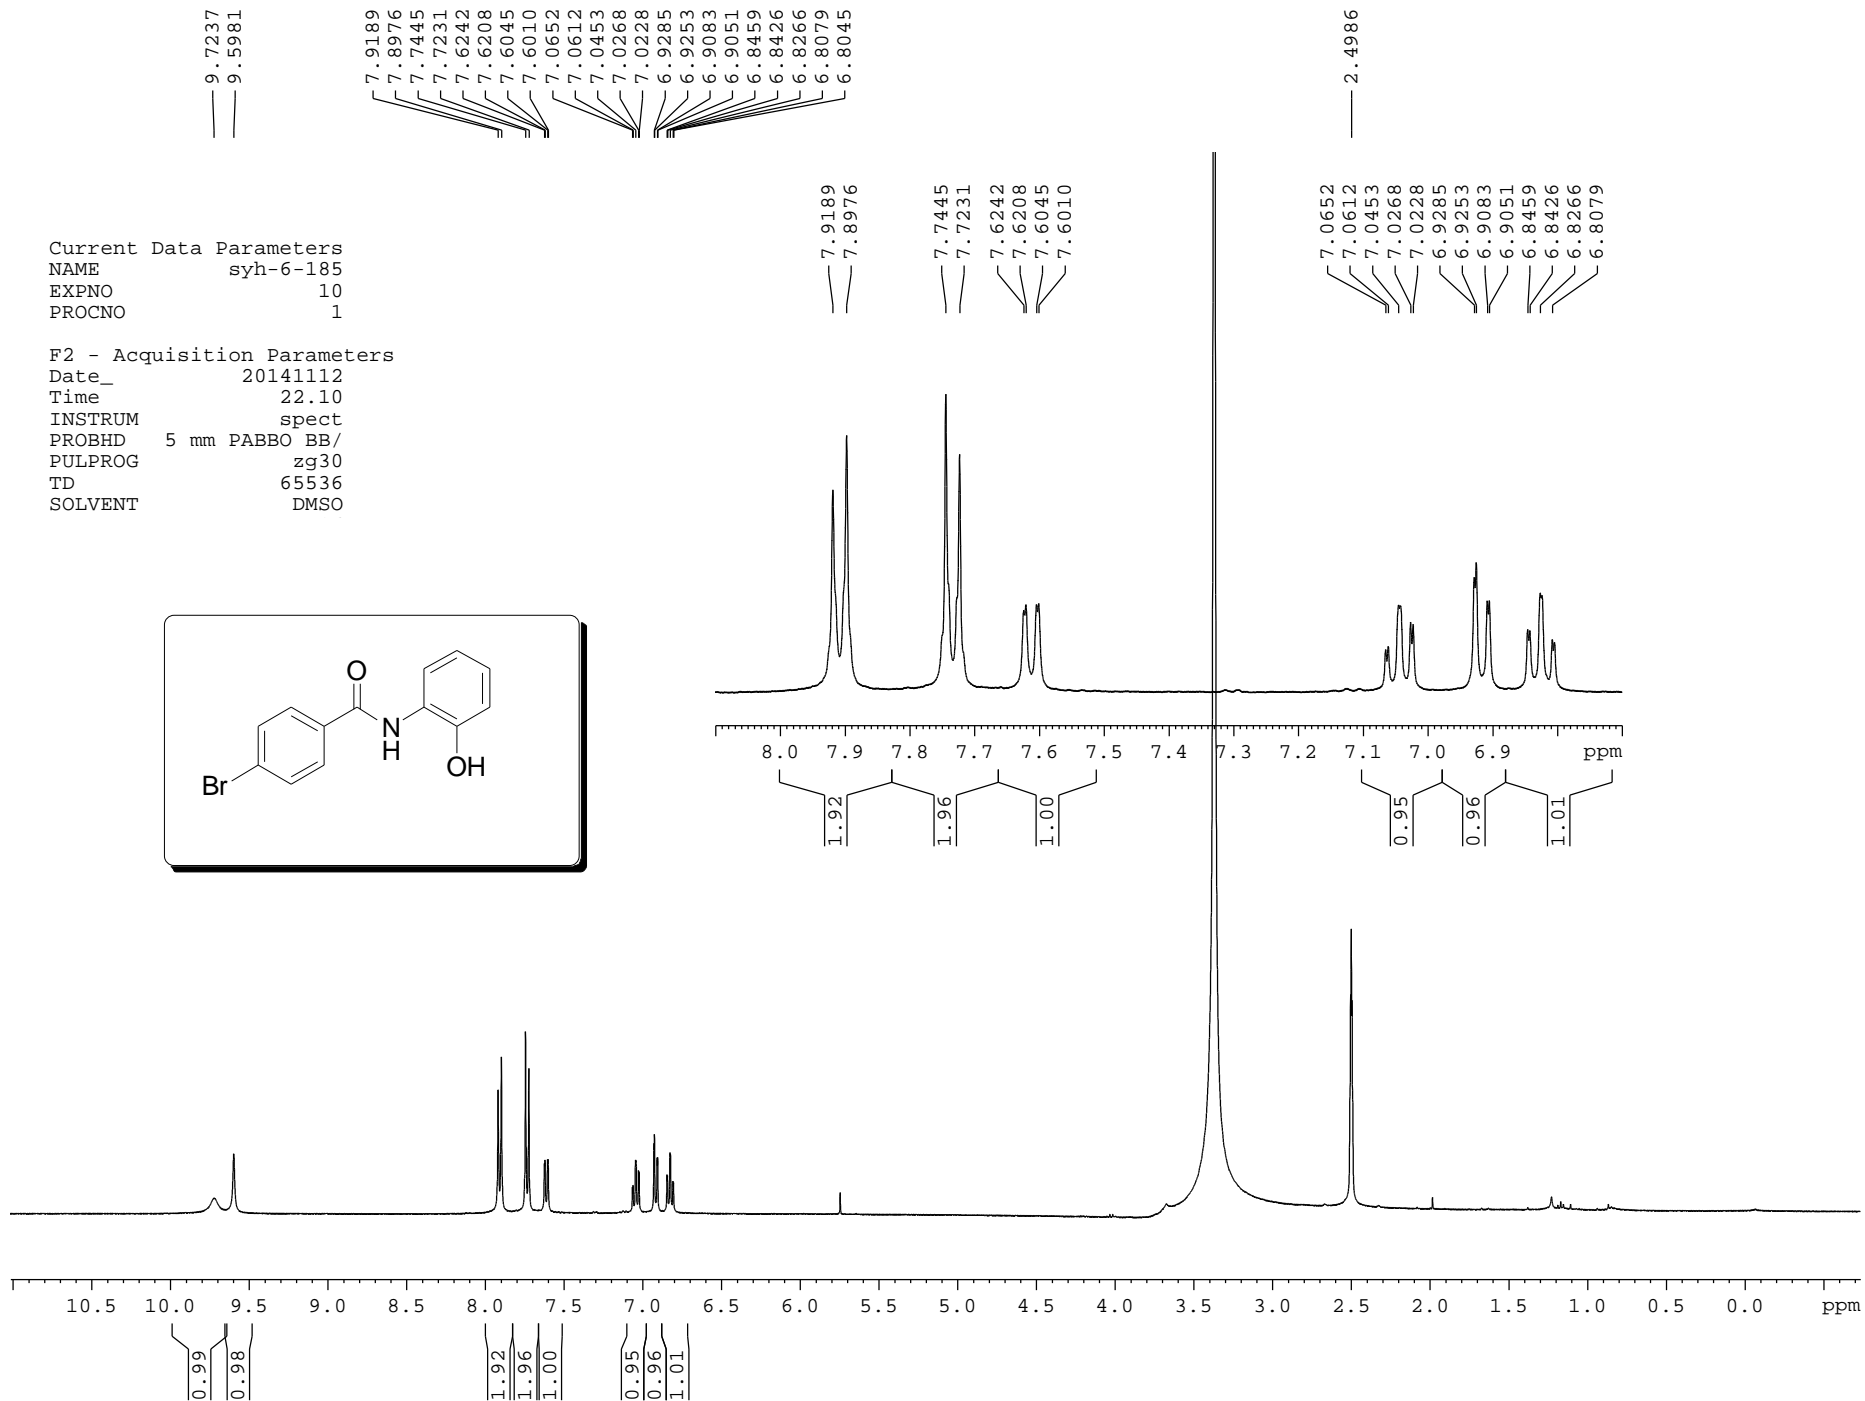

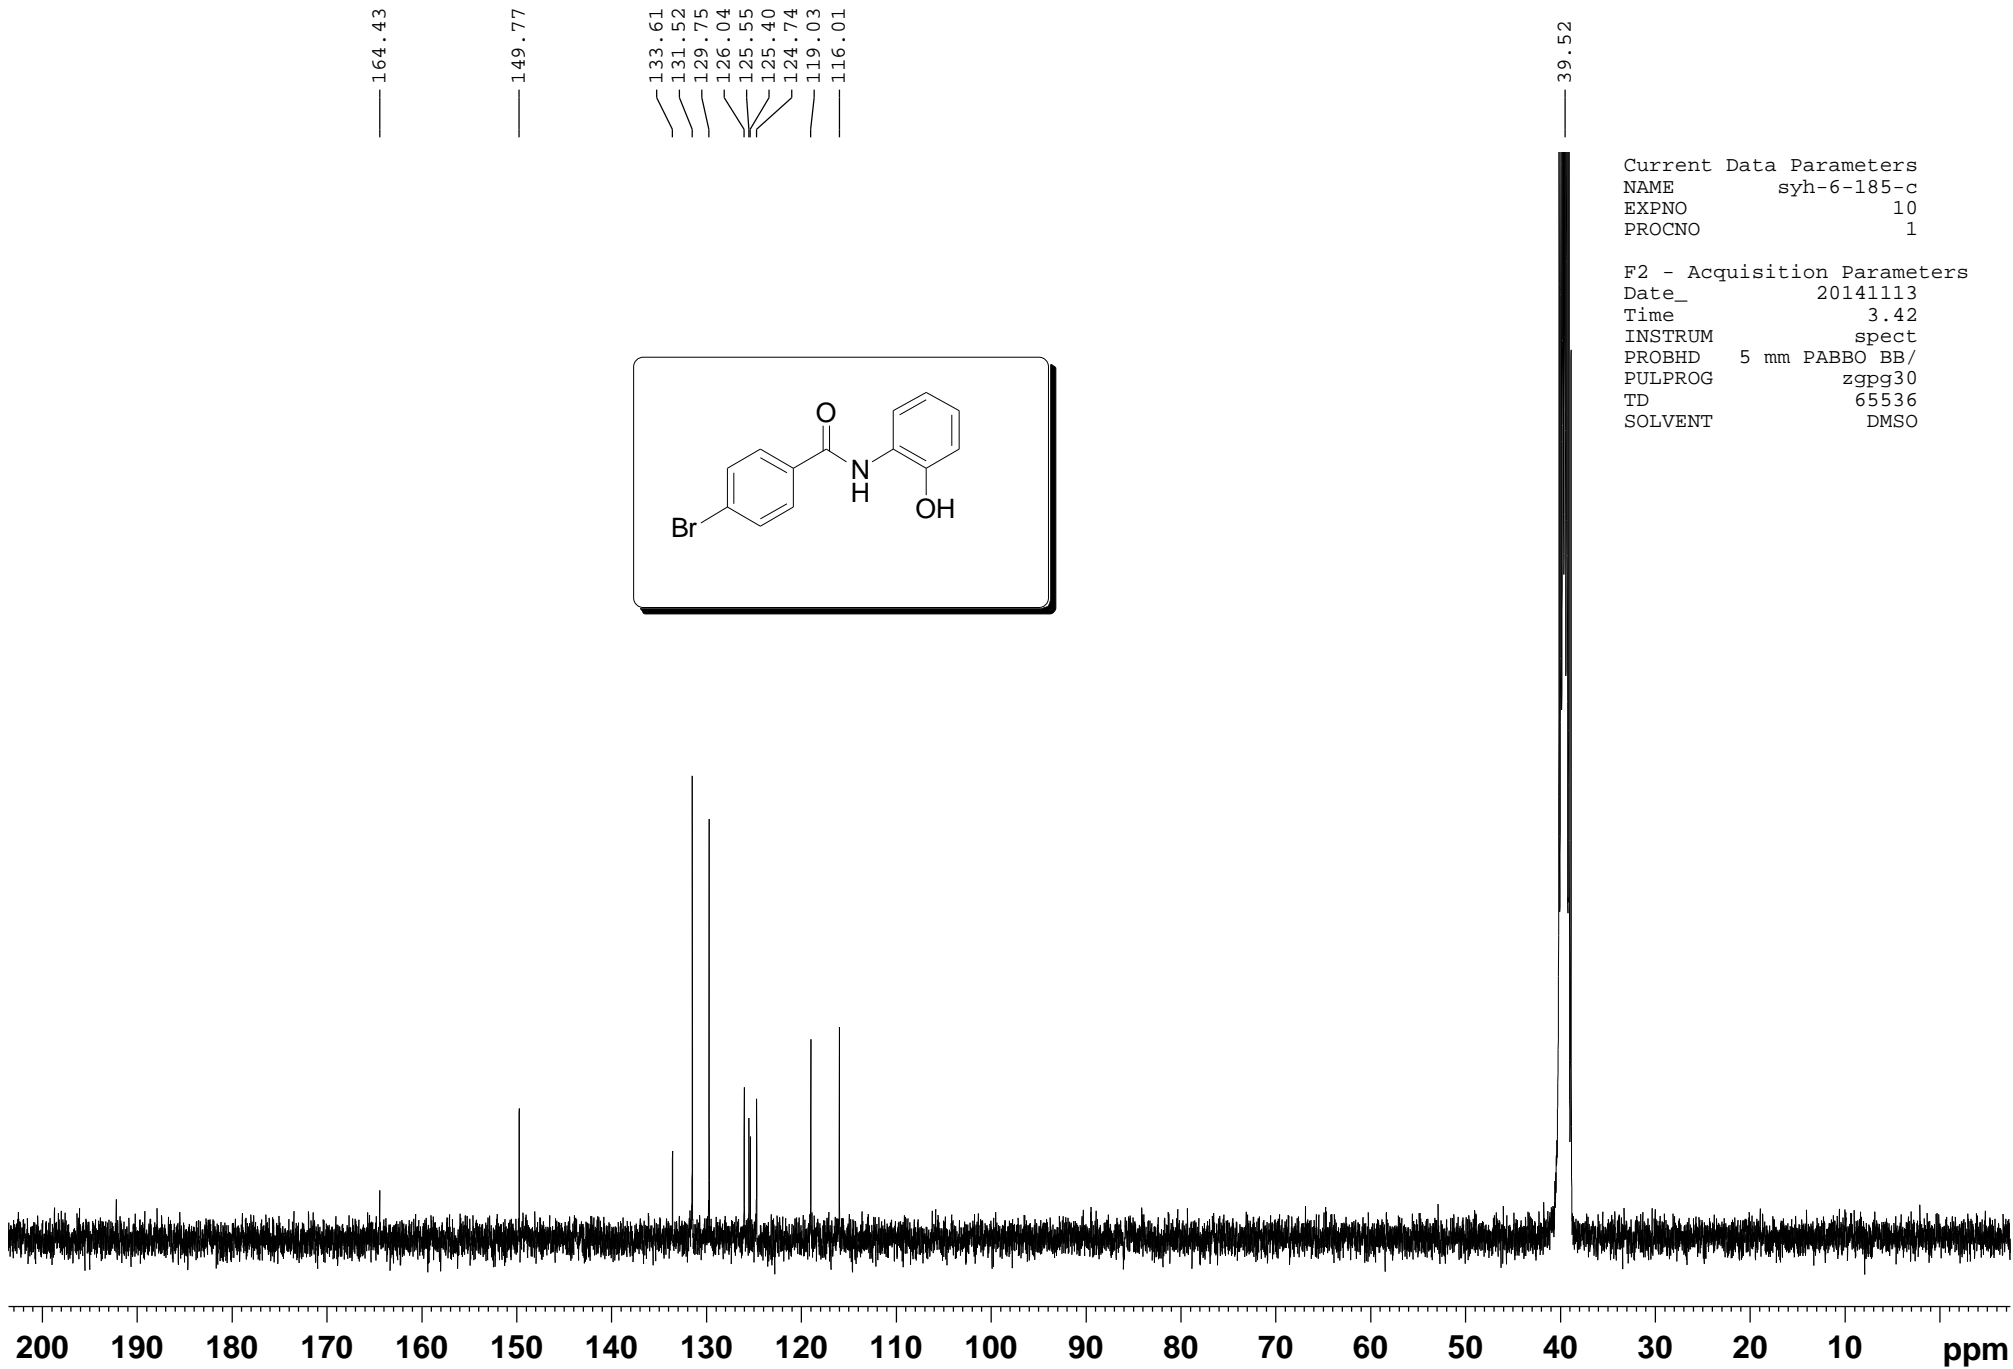

200 190 180 170 160 150 140 130 120 110 100 90 80 70 60 50 40 30 20 10 ppm

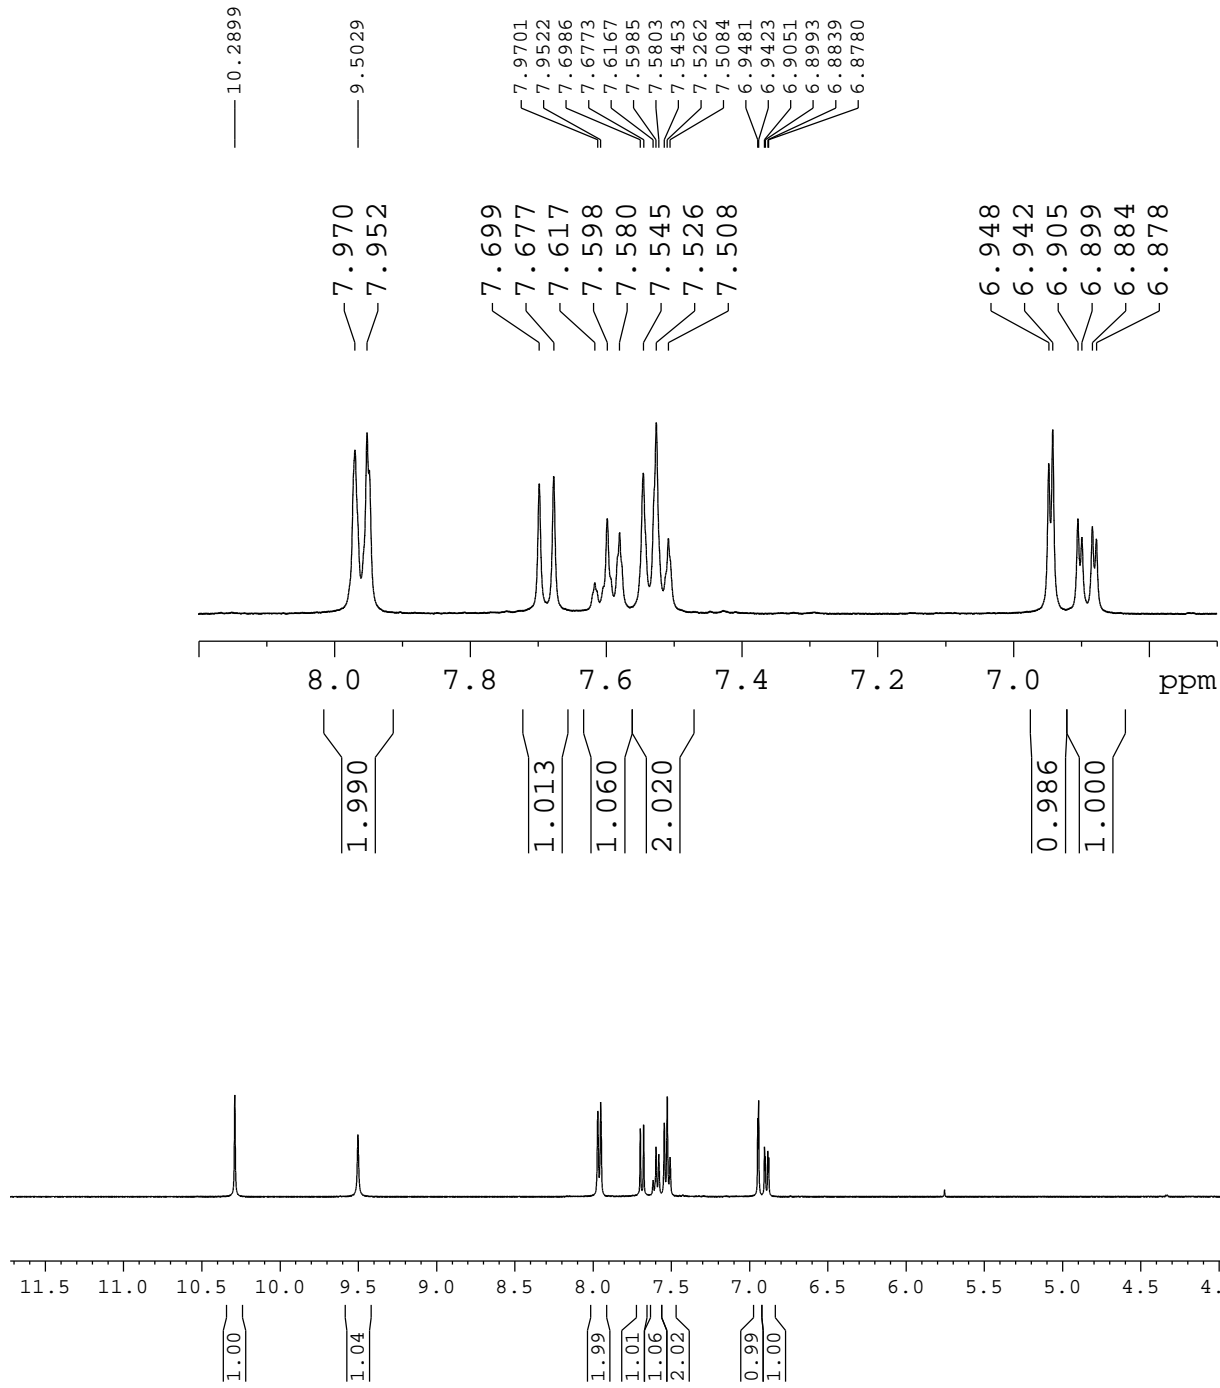

— 2.4995

Current Data Parameters  
 NAME syh-6-181-pp  
 EXPNO 10  
 PROCNO 1

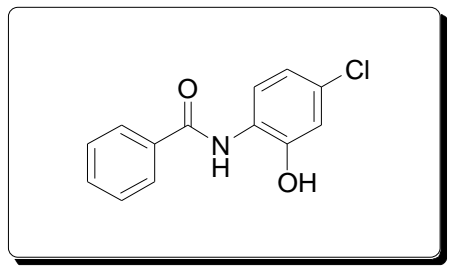

11.5 11.0 10.5 10.0 9.5 9.0 8.5 8.0 7.5 7.0 6.5 6.0 5.5 5.0 4.5 4.0 3.5 3.0 2.5 2.0 1.5 1.0 0.5 0.0 ppm

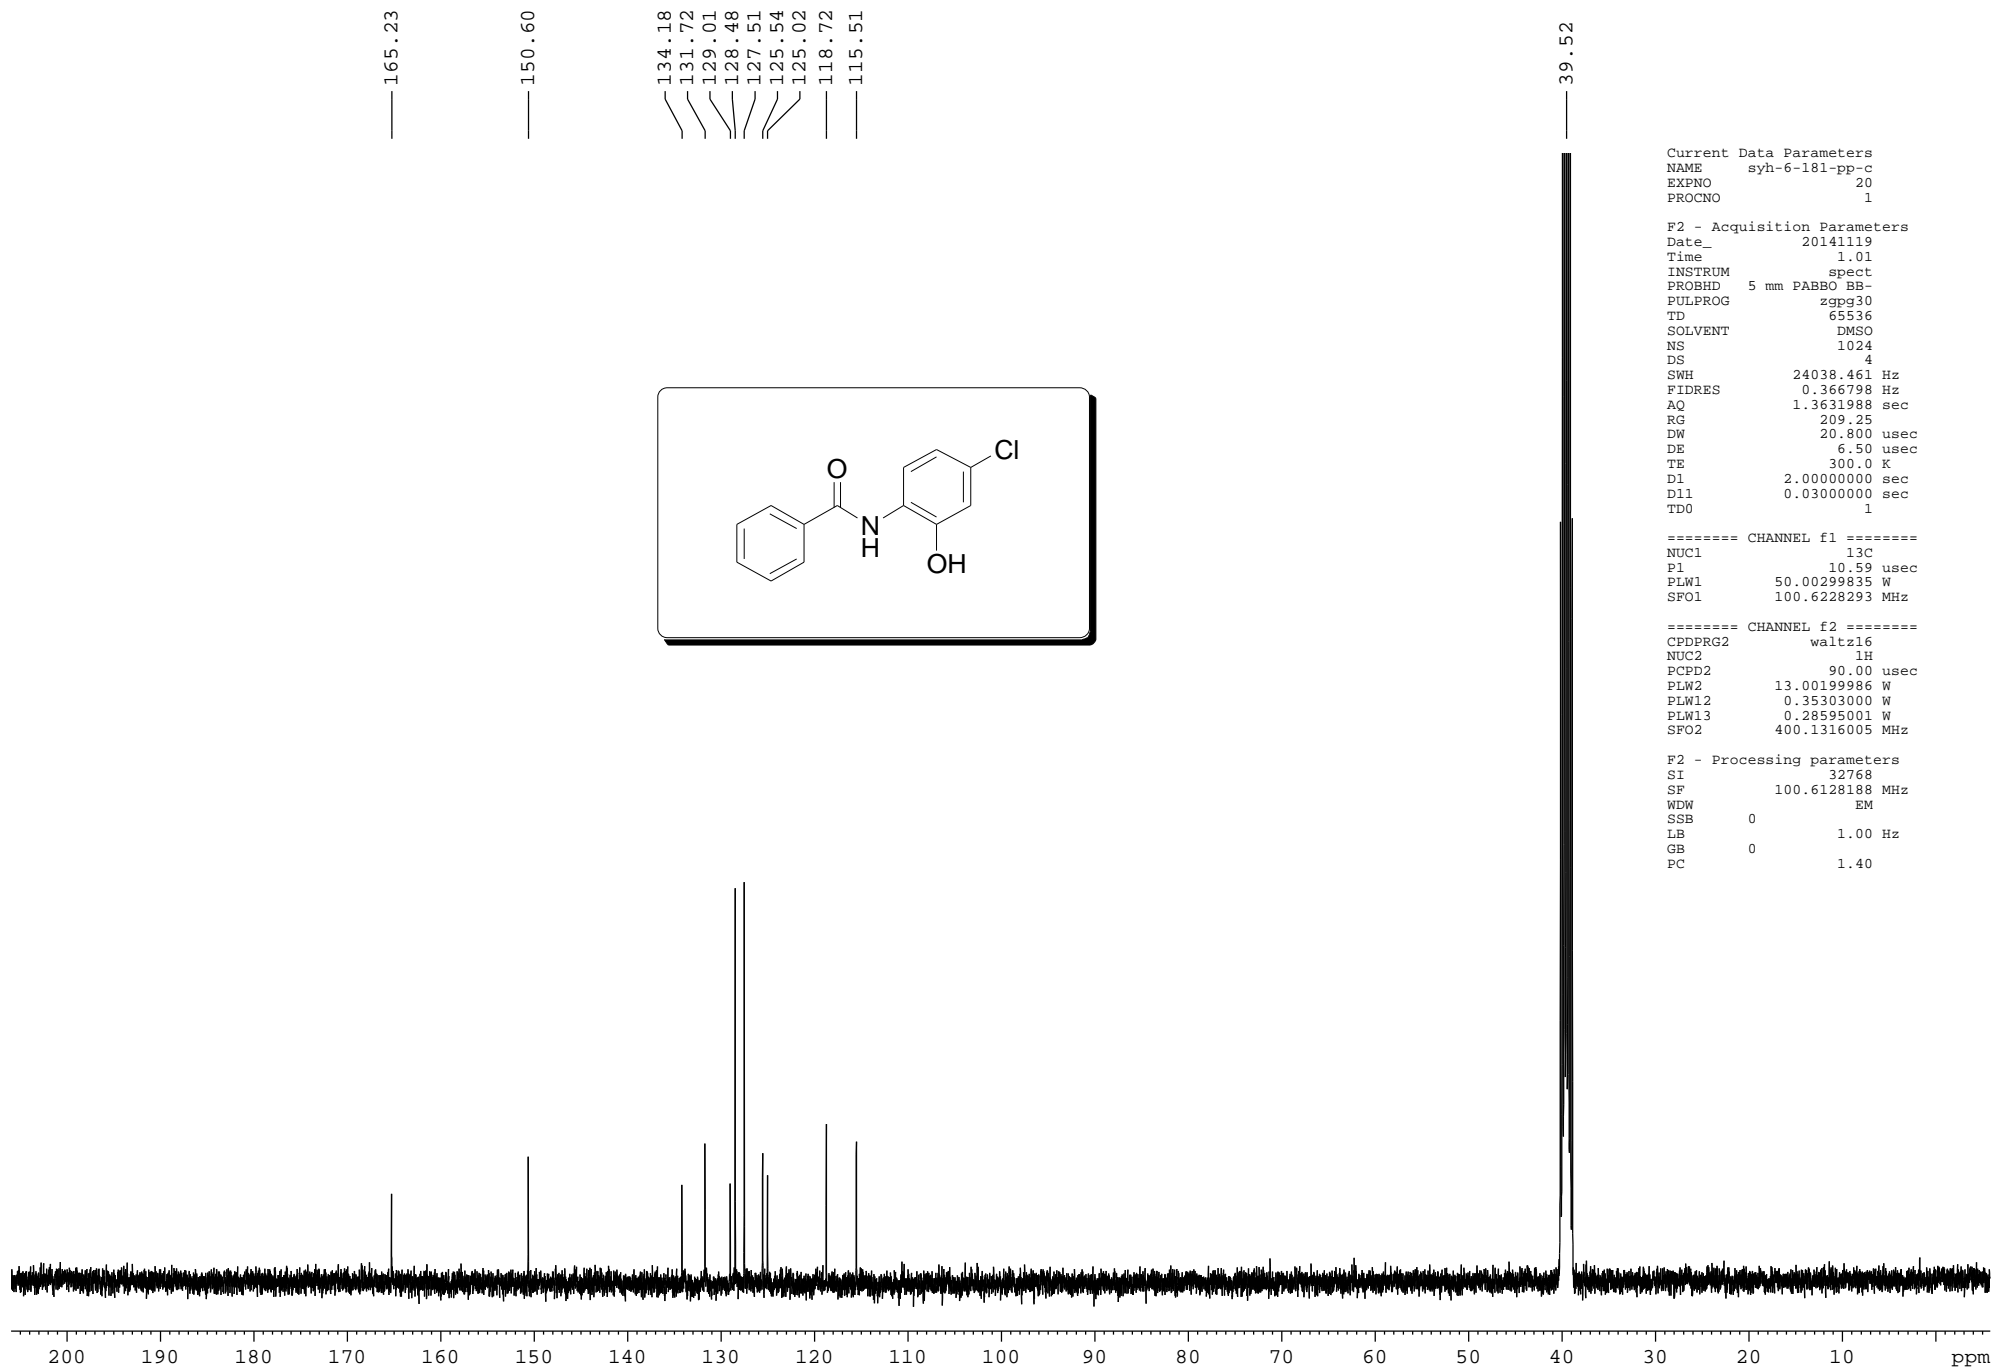

```

Current Data Parameters
NAME      syh-6-181-pp-c
EXPNO     20
PROCNO    1

F2 - Acquisition Parameters
Date_     20141119
Time      1.01
INSTRUM   spect
PROBHD    5 mm PABBO BB-
PULPROG   zgpg30
TD         65536
SOLVENT   DMSO
NS         1024
DS         4
SWH        24038.461 Hz
FIDRES     0.366798 Hz
AQ         1.3631988 sec
RG         209.25
DW         20.800 usec
DE         6.50 usec
TE         300.0 K
D1         2.00000000 sec
D11        0.03000000 sec
TD0        1

===== CHANNEL f1 =====
NUC1       13C
P1         10.59 usec
PLW1       50.00299835 W
SFO1       100.6228293 MHz

===== CHANNEL f2 =====
CPDPRG2   waltz16
NUC2       1H
PCPD2     90.00 usec
PLW2       13.00199986 W
PLW12     0.35303000 W
PLW13     0.28595001 W
SFO2       400.1316005 MHz

F2 - Processing parameters
SI         32768
SF         100.6128188 MHz
WDW        EM
SSB        0
LB         1.00 Hz
GB         0
PC         1.40

```

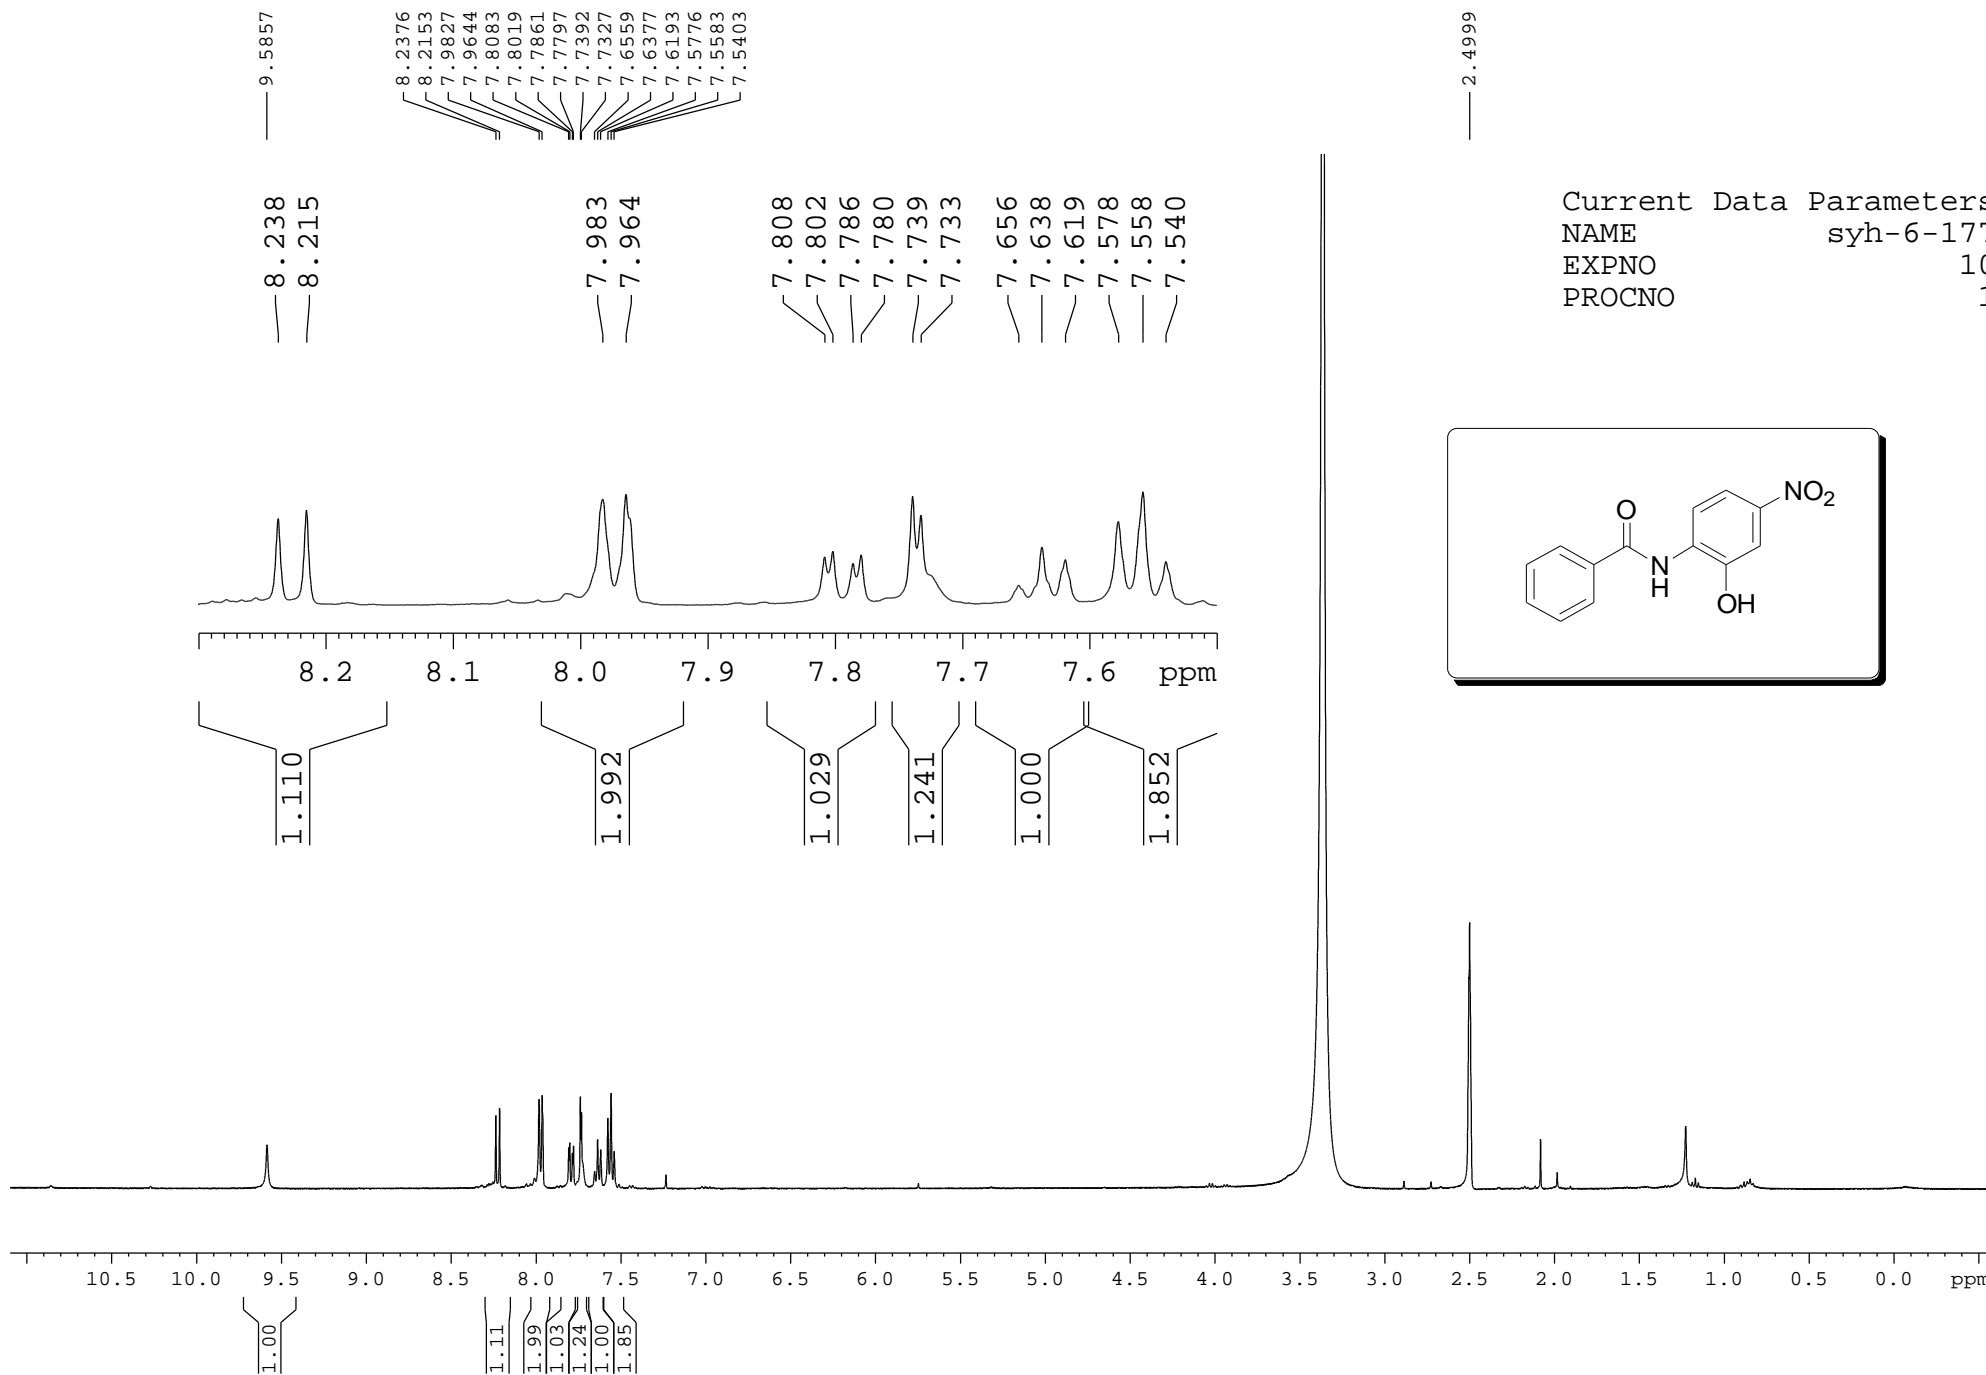

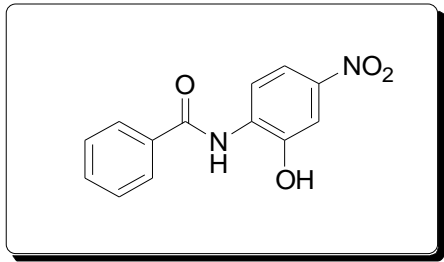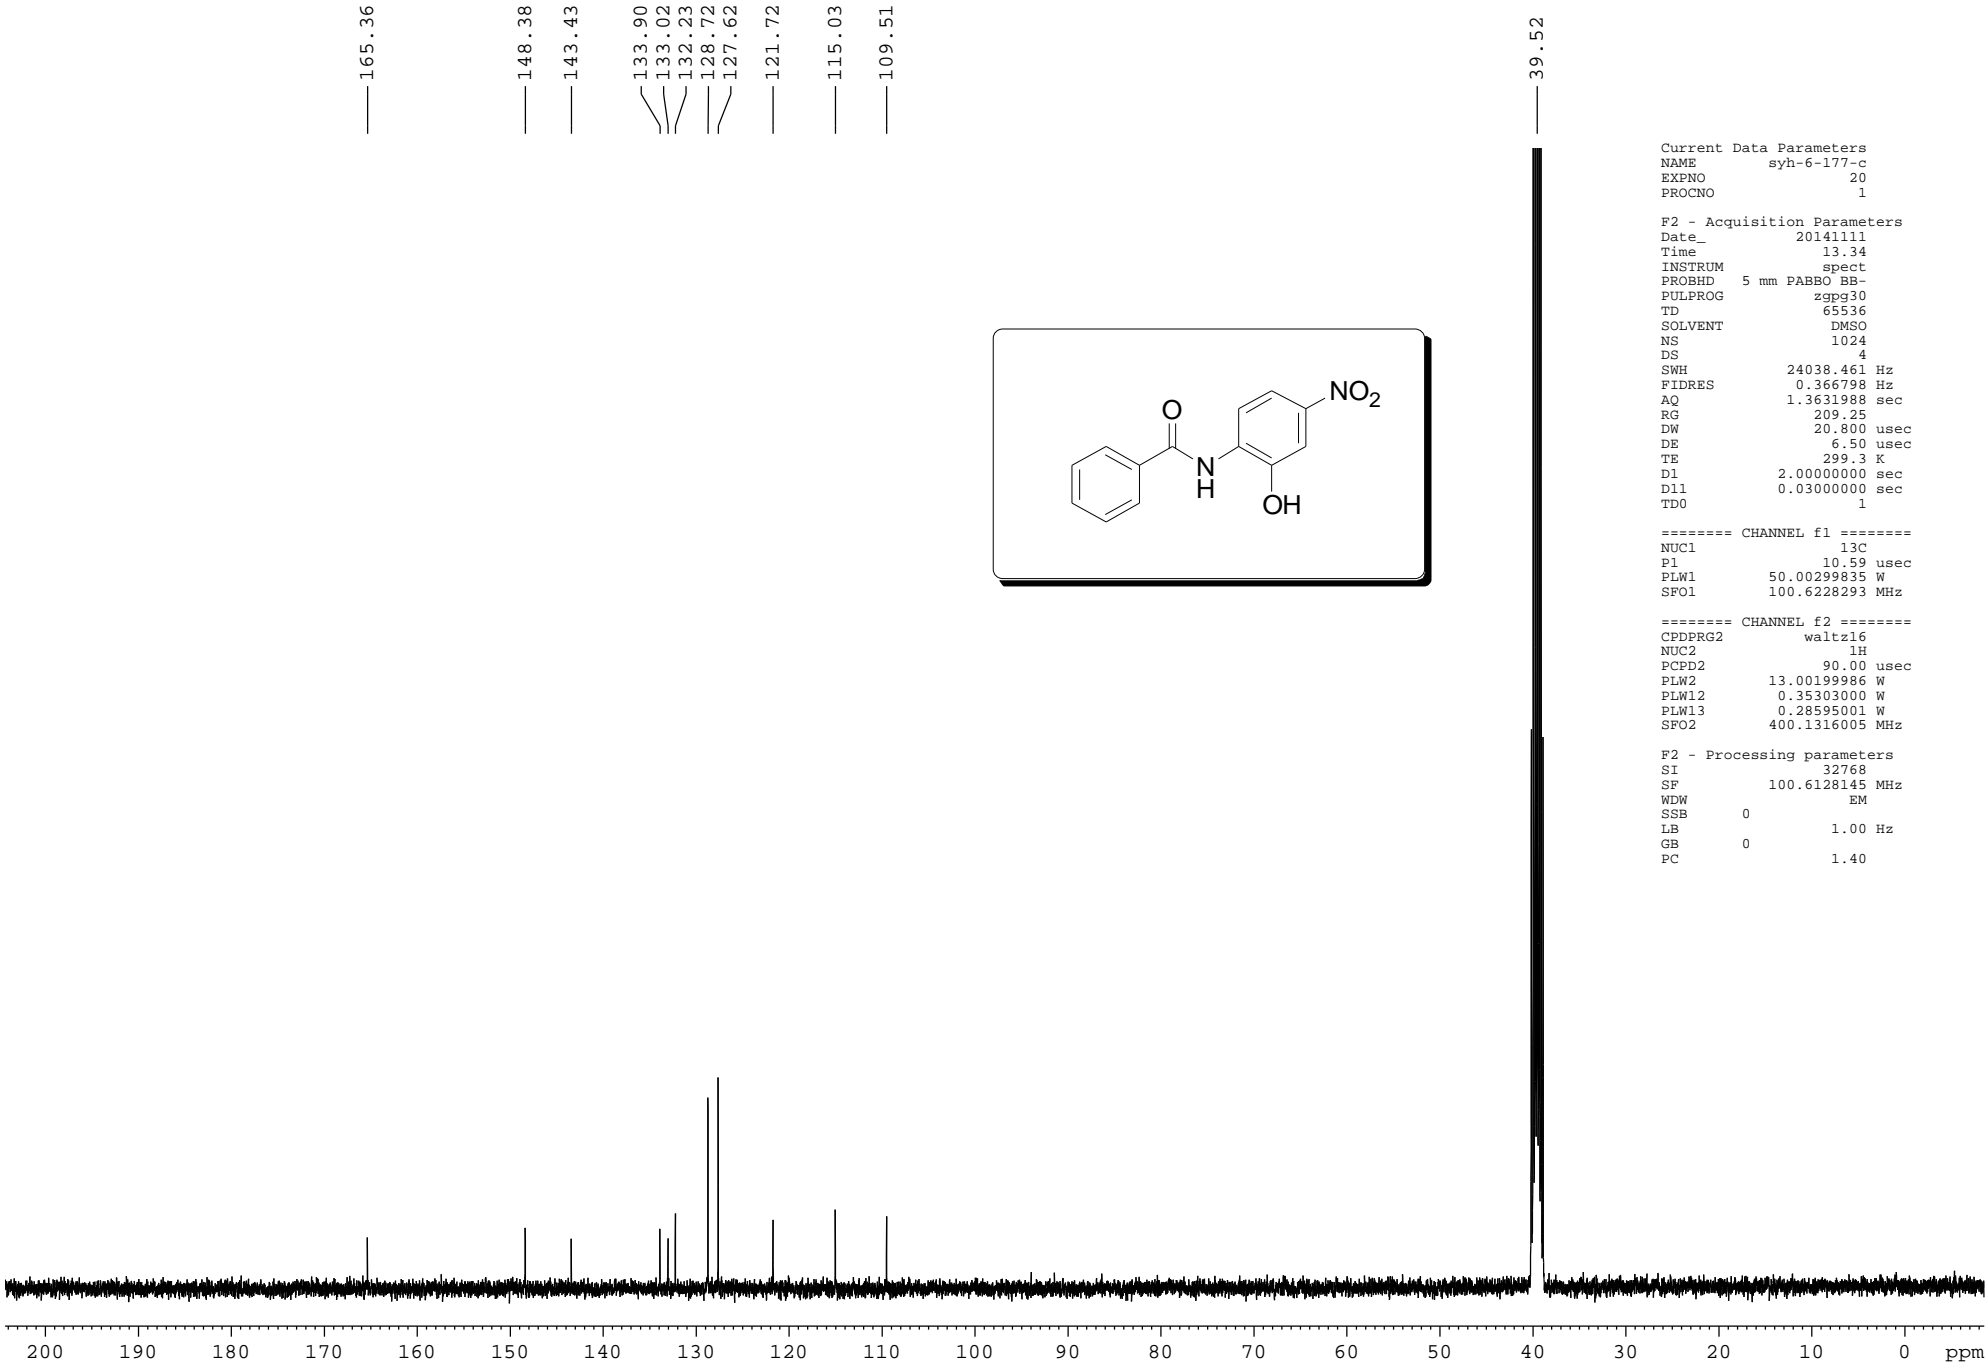

```

Current Data Parameters
NAME          syh-6-177-c
EXPNO         20
PROCNO        1

F2 - Acquisition Parameters
Date_         20141111
Time          13.34
INSTRUM       spect
PROBHD        5 mm PABBO BB-
PULPROG       zgpg30
TD            65536
SOLVENT       DMSO
NS            1024
DS            4
SWH           24038.461 Hz
FIDRES        0.366798 Hz
AQ            1.3631988 sec
RG            209.25
DW            20.800 usec
DE            6.50 usec
TE            299.3 K
D1            2.0000000 sec
D11           0.0300000 sec
TD0           1

===== CHANNEL f1 =====
NUC1          13C
P1            10.59 usec
PLW1          50.00299835 W
SFO1          100.6228293 MHz

===== CHANNEL f2 =====
CPDPRG2       waltz16
NUC2          1H
PCPD2         90.00 usec
PLW2          13.00199986 W
PLW12         0.35303000 W
PLW13         0.28595001 W
SFO2          400.1316005 MHz

F2 - Processing parameters
SI            32768
SF            100.6128145 MHz
WDW           EM
SSB           0
LB            1.00 Hz
GB            0
PC            1.40
  
```

# The NMR of preliminary mechanistic study (intermolecular)

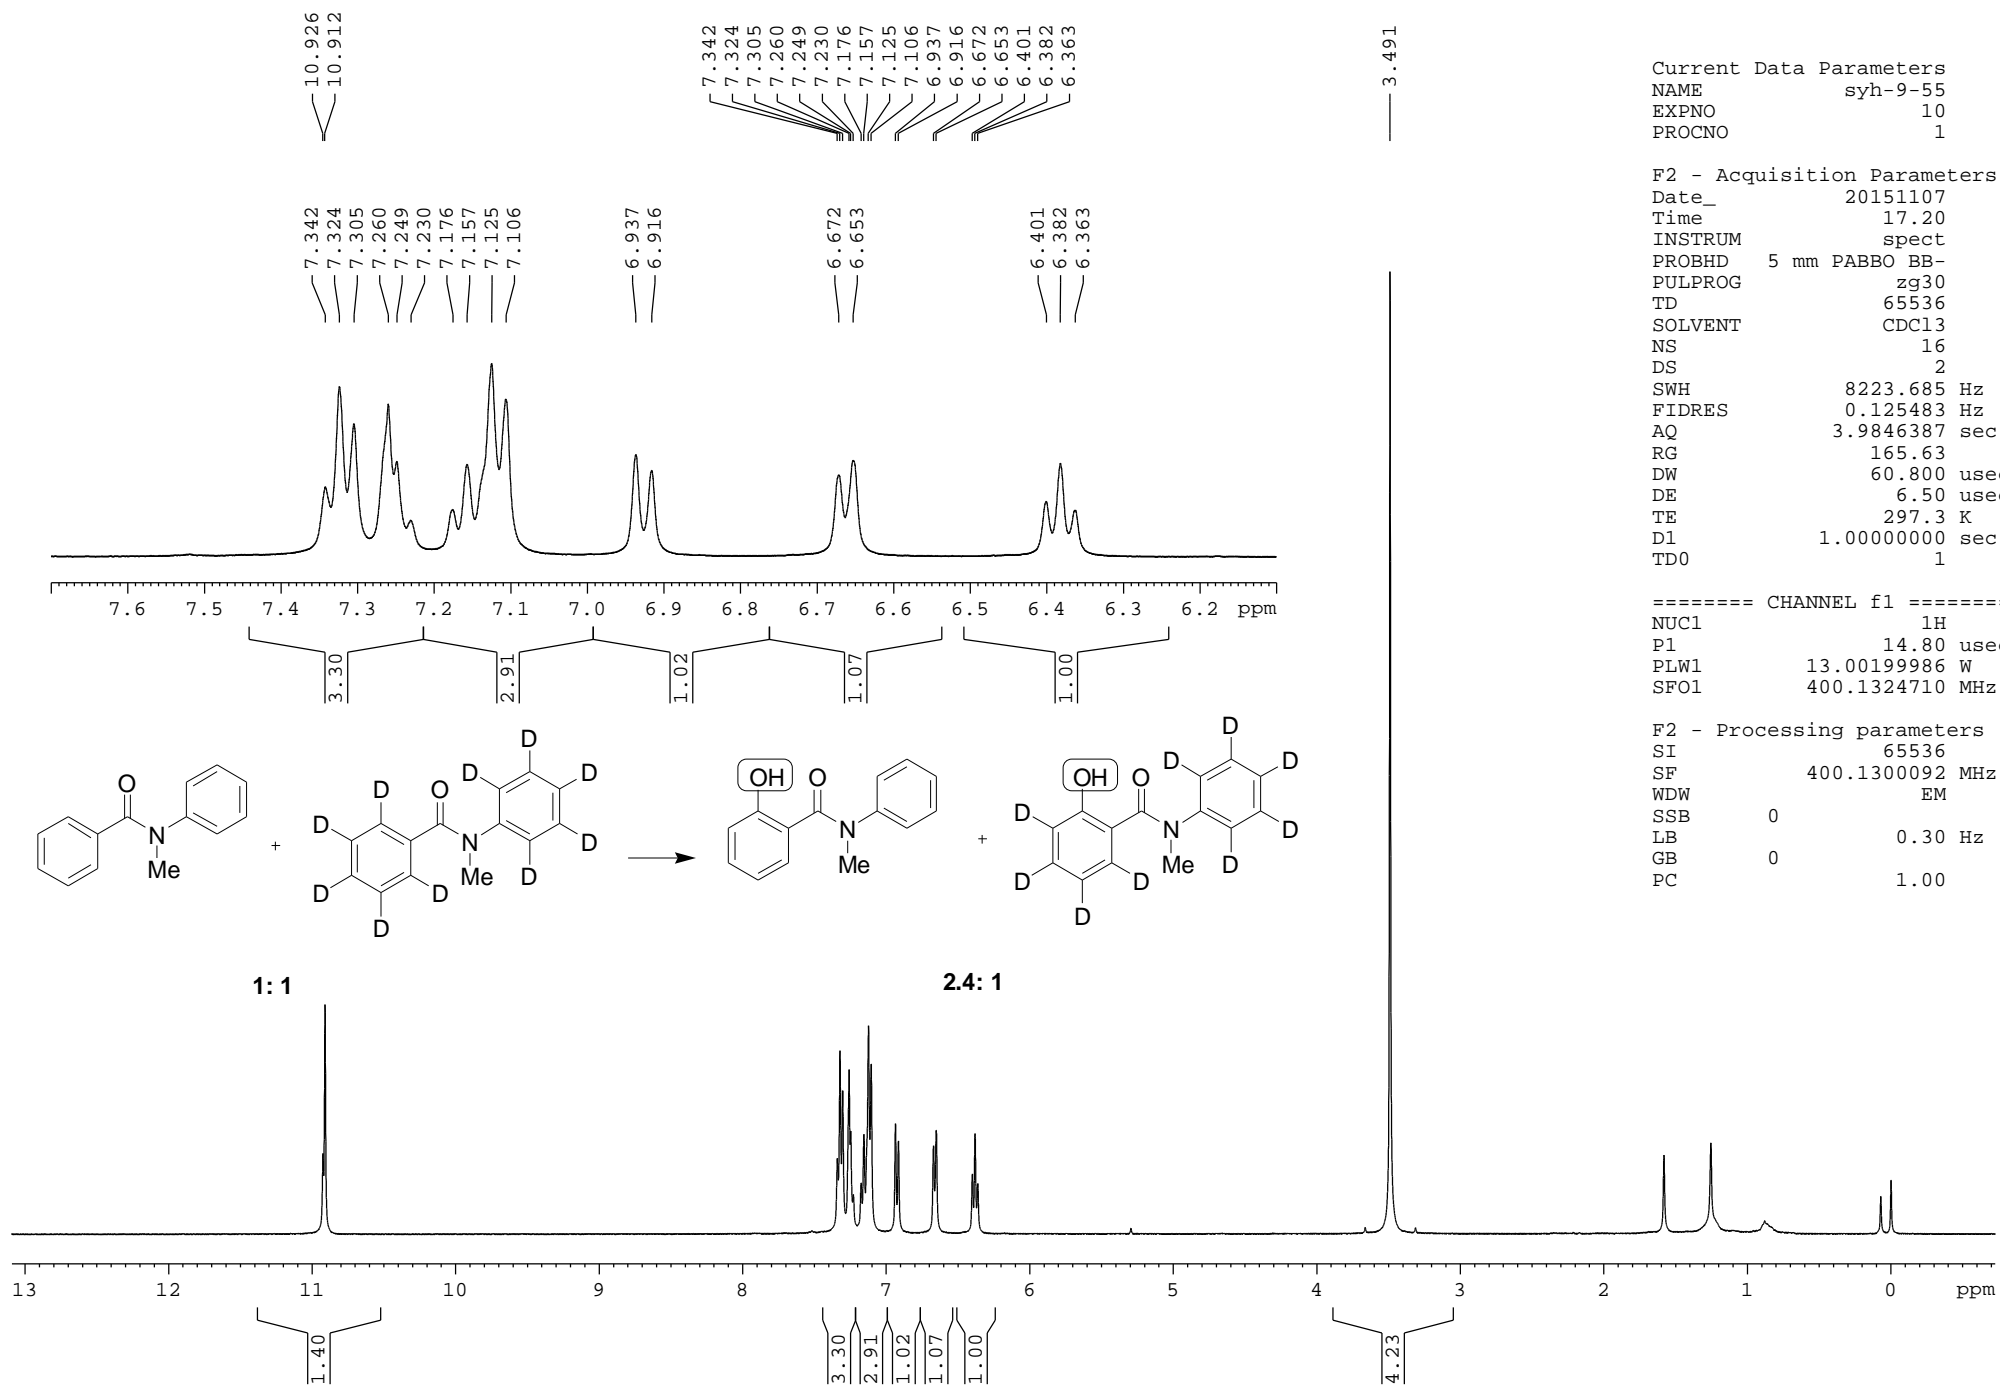

# The NMR of preliminary mechanistic study (intermolecular)

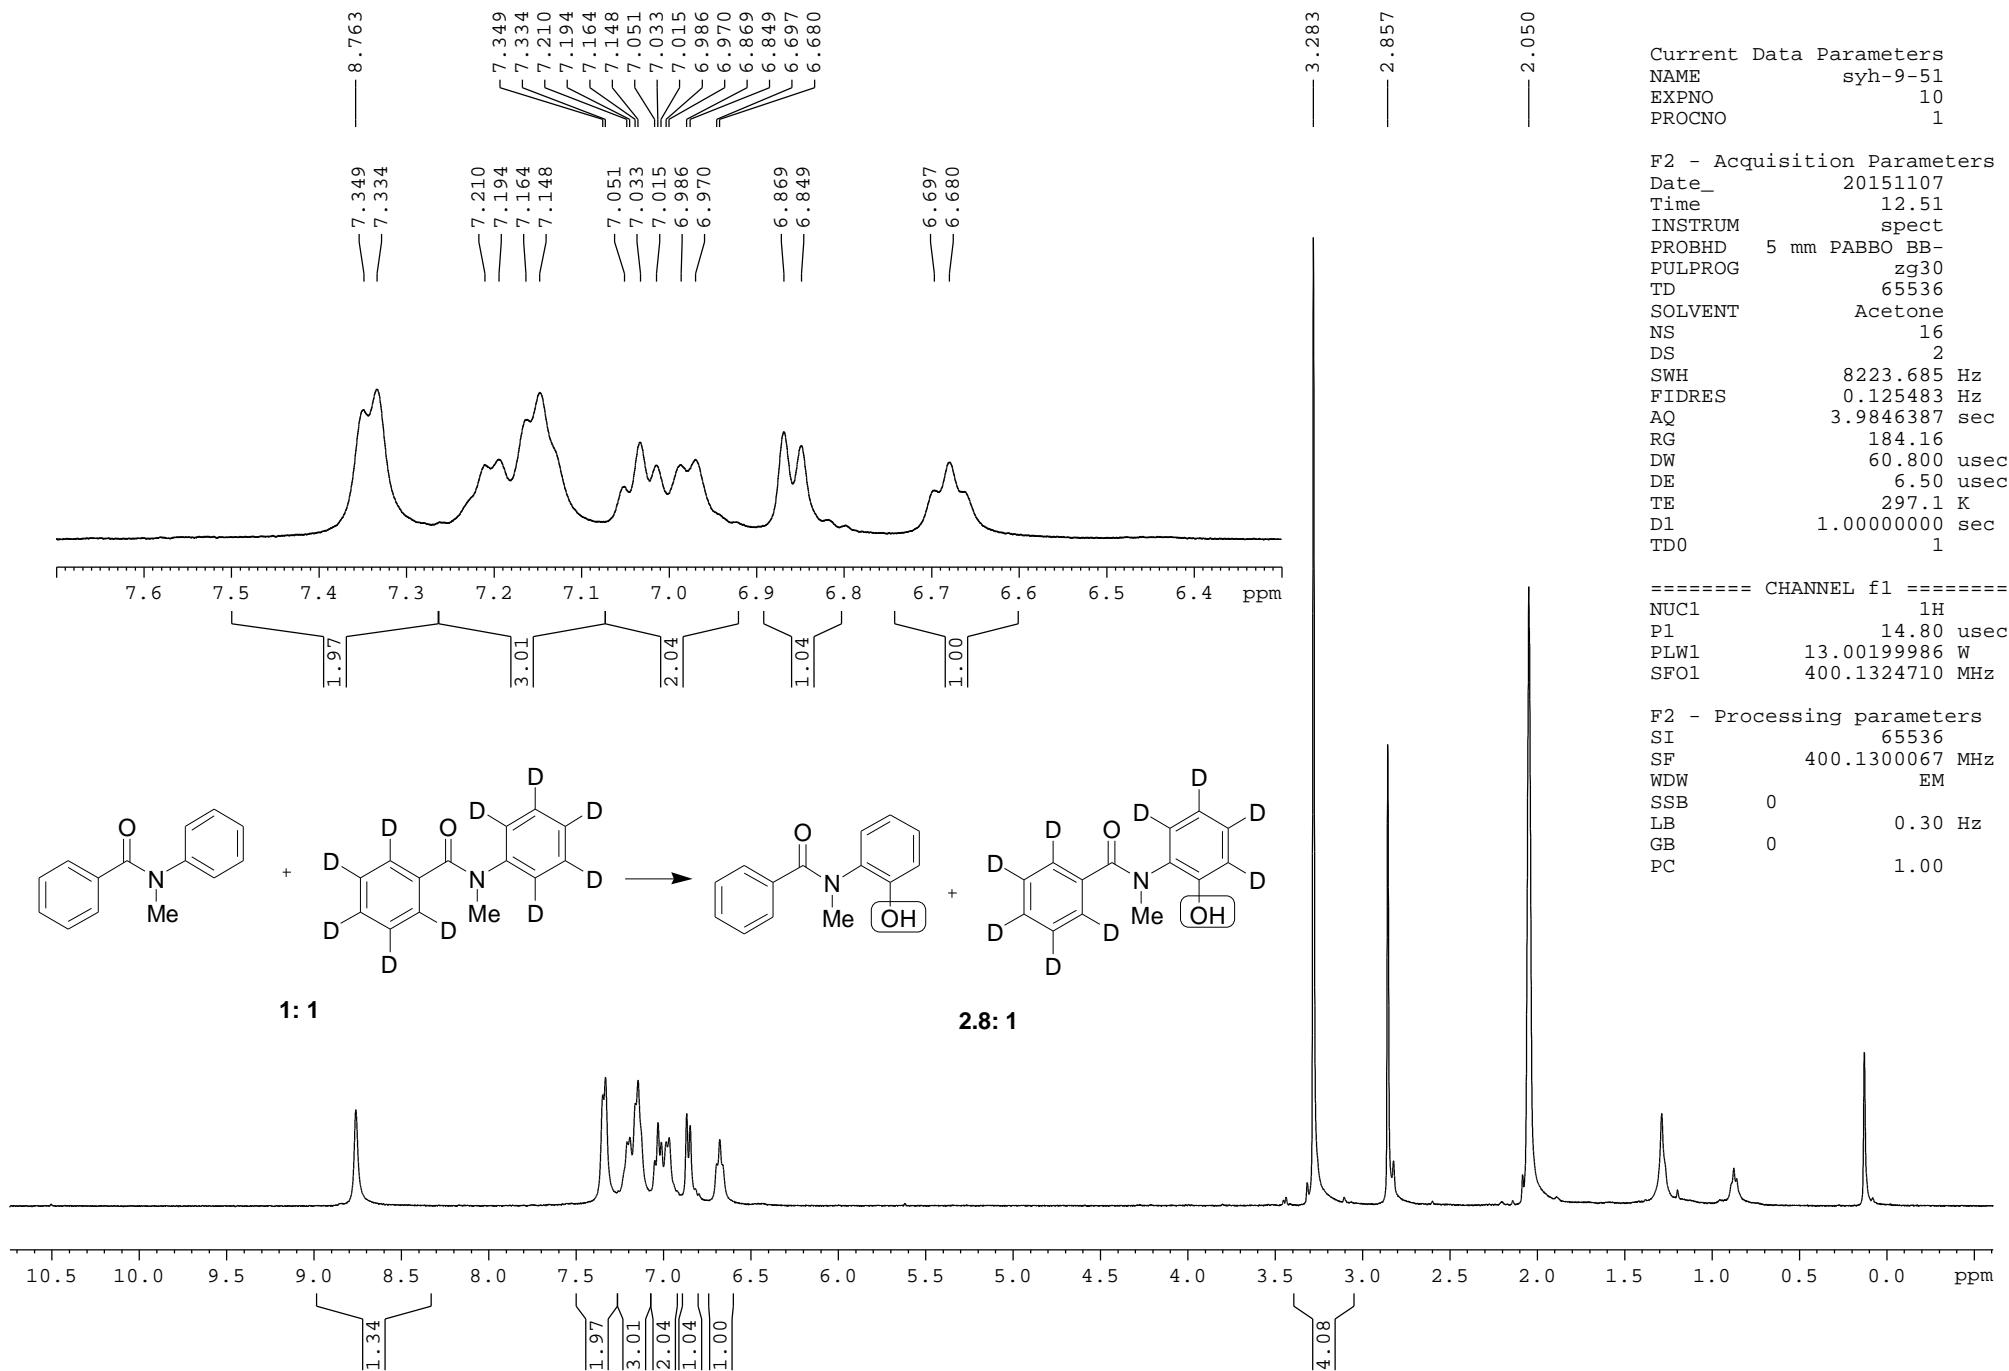



# The NMR of preliminary mechanistic study (intramolecular)

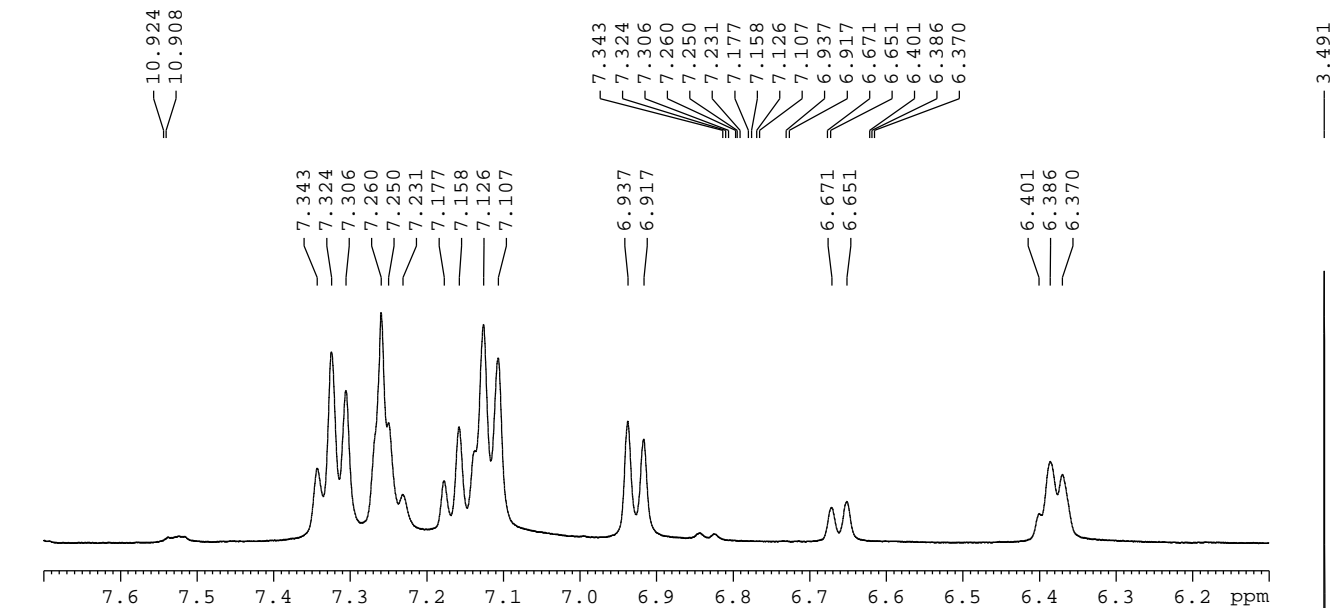

Current Data Parameters  
 NAME syh-9-67-2  
 EXPNO 10  
 PROCNO 1

F2 - Acquisition Parameters  
 Date\_ 20151112  
 Time 14.50  
 INSTRUM spect  
 PROBHD 5 mm PABBO BB-  
 PULPROG zg30  
 TD 65536  
 SOLVENT CDCl3  
 NS 16  
 DS 2  
 SWH 8223.685 Hz  
 FIDRES 0.125483 Hz  
 AQ 3.9846387 sec  
 RG 184.16  
 DW 60.800 usec  
 DE 6.50 usec  
 TE 297.9 K  
 D1 1.00000000 sec  
 TD0 1

==== CHANNEL f1 =====  
 NUC1 1H  
 P1 14.80 usec  
 PLW1 13.00199986 W  
 SFO1 400.1324710 MHz

F2 - Processing parameters  
 SI 65536  
 SF 400.1300095 MHz  
 WDW EM  
 SSB 0  
 LE 0.30 Hz  
 GE 0  
 PC 1.00

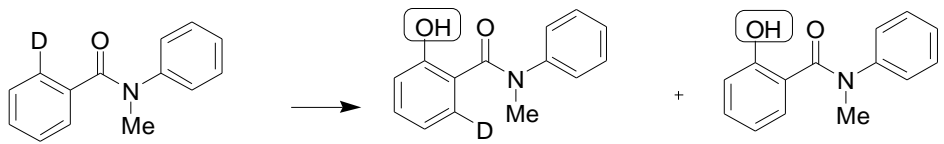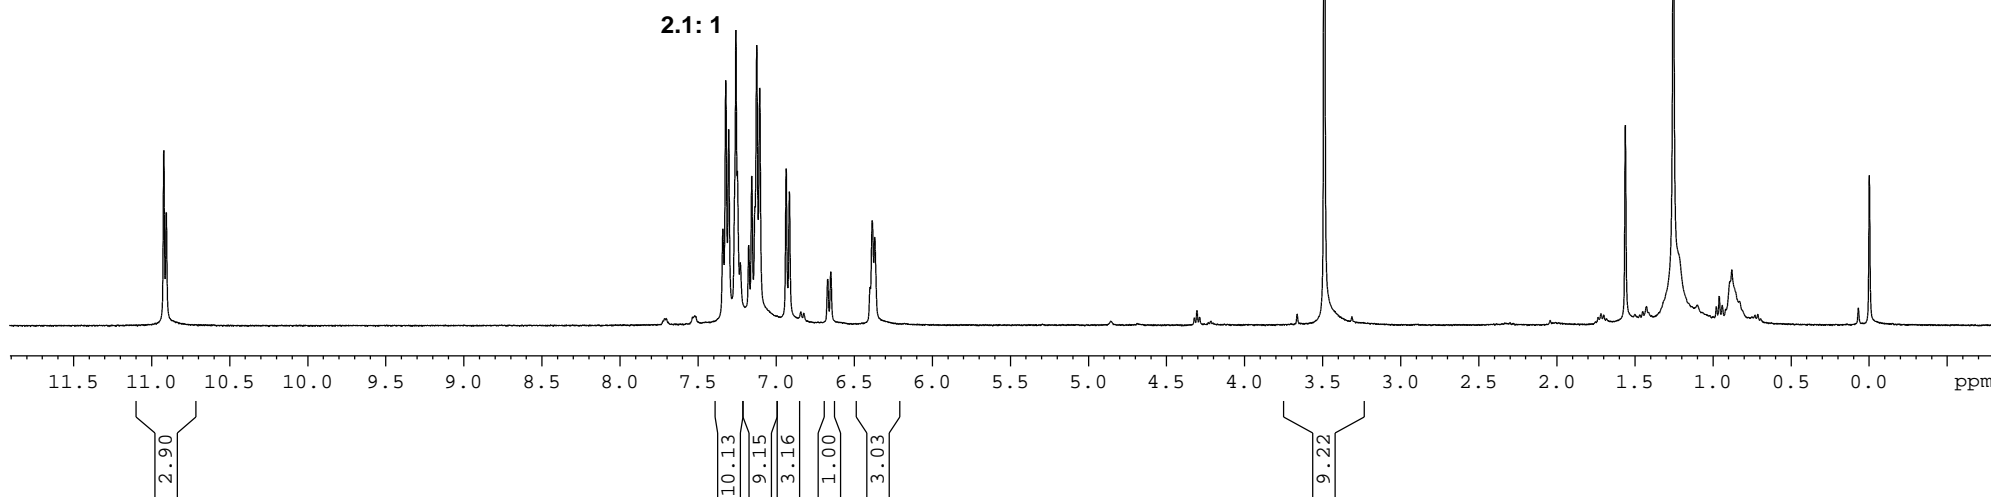

# The NMR of preliminary mechanistic study (intramolecular)

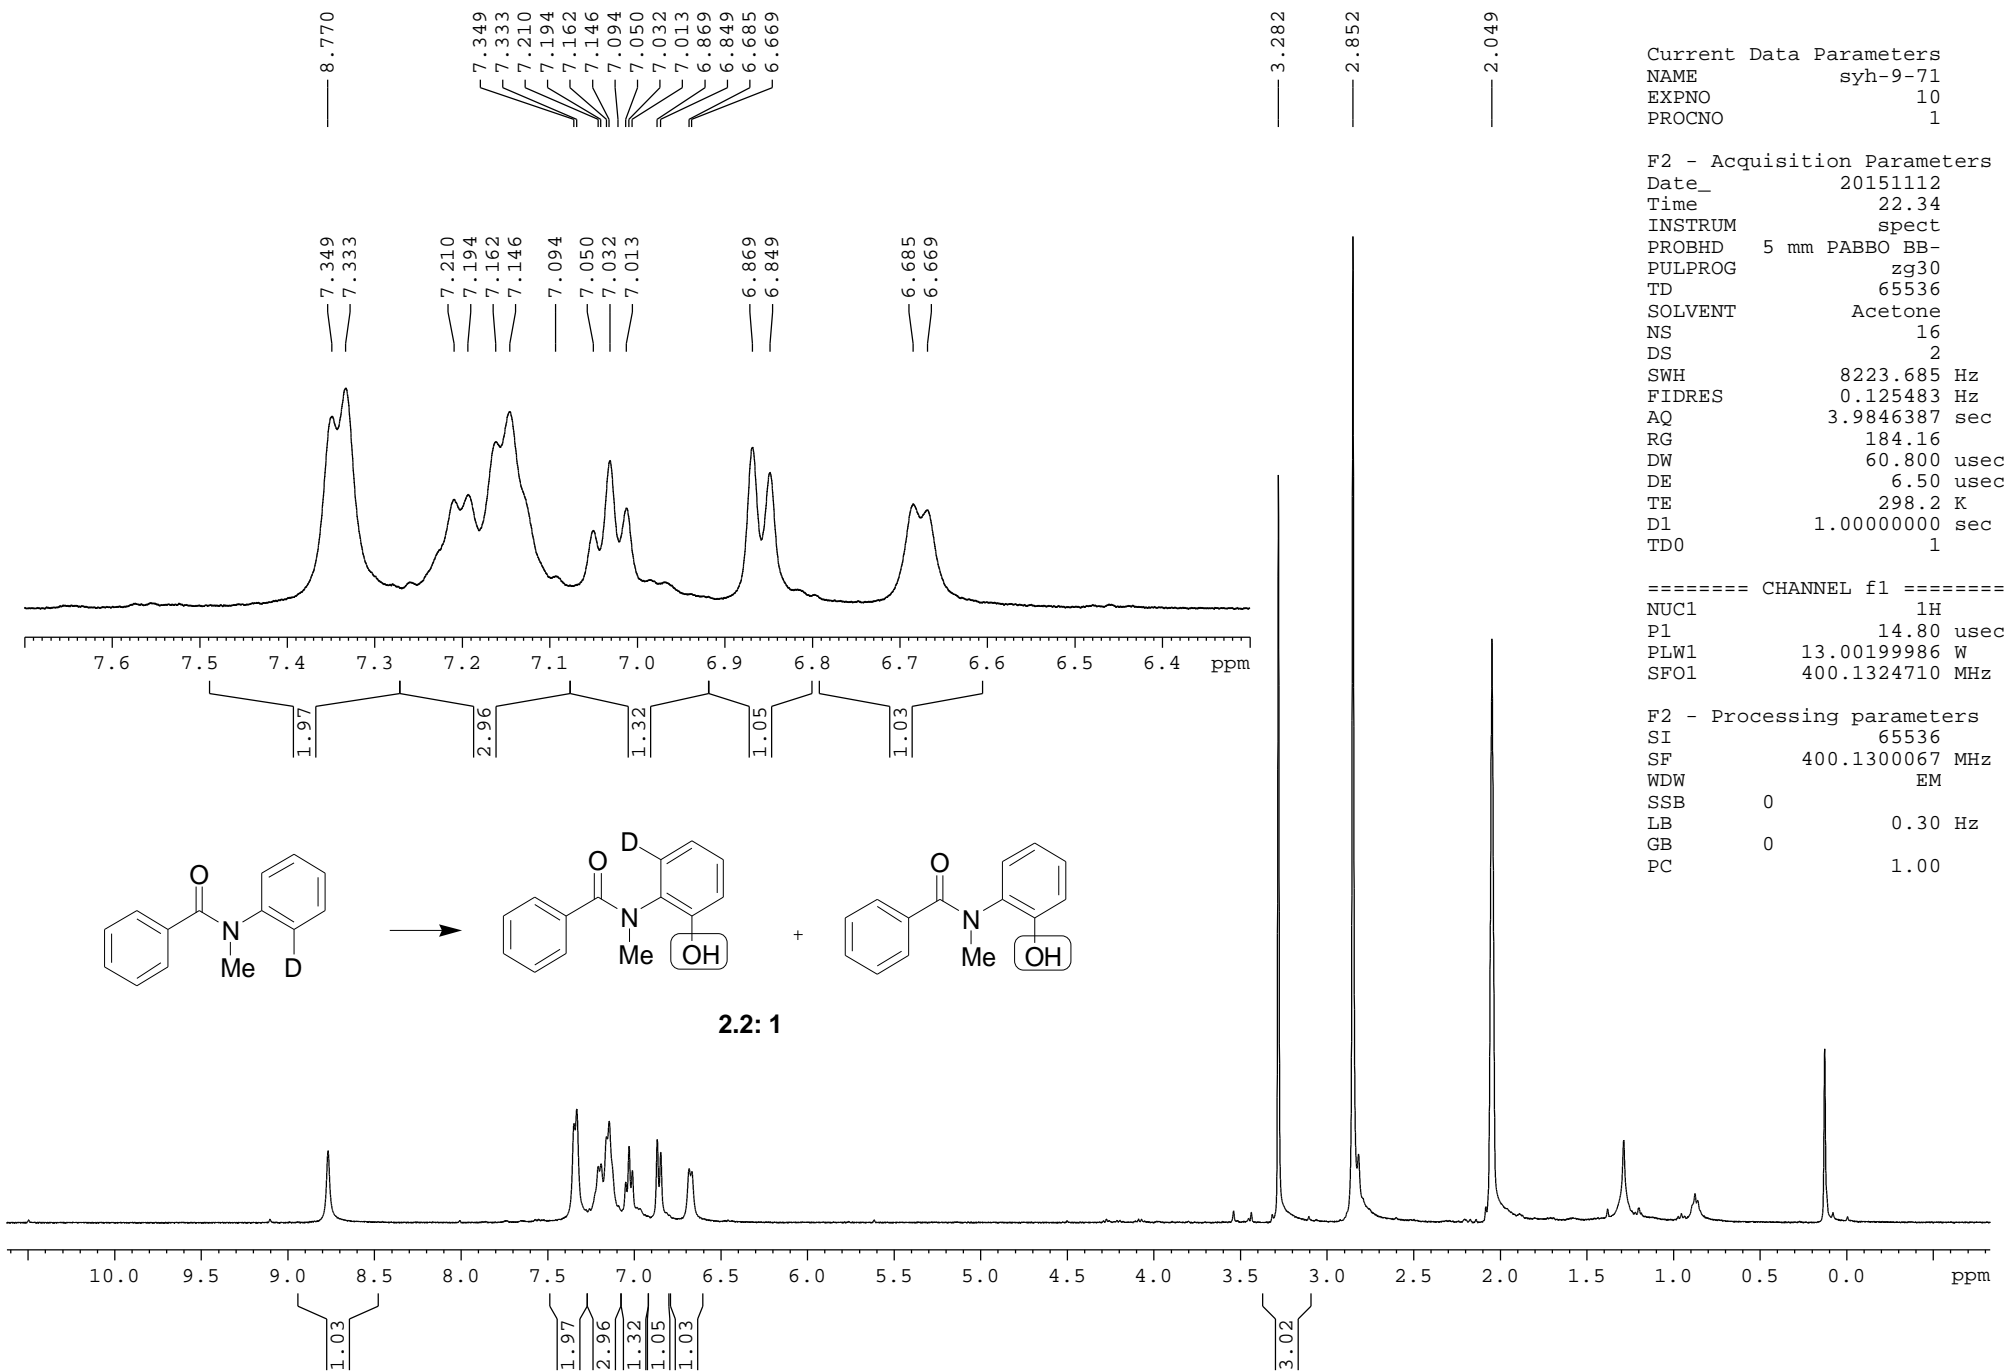

Supplement: SC-007-C5SC03905C-s002.pdf [file SC-007-C5SC03905C-s002.pdf]
