# Supplementary material for: A diversity-oriented synthesis of bioactive benzanilides via a regioselective C(sp2)–H hydroxylation strategy
Source: PubMed Central journal article supplement — Chem Sci. 2015 Dec 3;7(3):2229–38. doi: 10.1039/c5sc03905c (PMC5975941; doi:10.1039/c5sc03905c), 2015-12-03
Supplement: SC-007-C5SC03905C-s001.pdf [file SC-007-C5SC03905C-s001.pdf]

# Supporting Information

## A Diversity-Oriented Synthesis of Bioactive Benzanilides by a Regioselective C(sp<sup>2</sup>)-H Hydroxylation Strategy

Yong-Hui Sun,<sup>‡</sup><sup>a</sup> Tian-Yu Sun,<sup>‡</sup><sup>b</sup> Yun-Dong Wu,<sup>b,c</sup> Xinhao Zhang,<sup>\*b</sup> and Yu Rao<sup>\*a</sup>

<sup>a</sup>MOE Key Laboratory of Protein Sciences, Department of Pharmacology and Pharmaceutical Sciences, School of Medicine and School of Life Sciences, Tsinghua University, Beijing 100084, China

<sup>b</sup>Lab of Computational Chemistry and Drug Design, Key Laboratory of Chemical Genomics, Peking University Shenzhen Graduate School, Shenzhen 518055, China

<sup>c</sup>College of Chemistry, Peking University, Beijing 100871, China

[yrao@mail.tsinghua.edu.cn](mailto:yrao@mail.tsinghua.edu.cn)

[zhangxh@pkusz.edu.cn](mailto:zhangxh@pkusz.edu.cn)

<sup>‡</sup> These authors contributed equally to this work.

| <b>Table of Contents</b>                           | <b>Page</b>  |
|----------------------------------------------------|--------------|
| <b>Experimental part:</b>                          |              |
| <b>Materials and Methods</b>                       | <b>S1</b>    |
| <b>General procedures</b>                          | <b>S1-S2</b> |
| <b>Procedure for gram scale reactions</b>          | <b>S2</b>    |
| <b>Procedure for preliminary mechanistic study</b> | <b>S2-S4</b> |
| <b>Reference</b>                                   | <b>S4</b>    |
| <b>Table S1 and Table S2</b>                       | <b>S4-S5</b> |
| <b>Data of products</b>                            | <b>S5</b>    |

**Computational part:**

|                                                                                                      |            |
|------------------------------------------------------------------------------------------------------|------------|
| <b>Computational details</b>                                                                         | <b>S32</b> |
| <b>Potential energy surface (PES) of C-H activation</b>                                              | <b>S32</b> |
| <b>Model calculations to examine the role of steric factor<br/>in Ru-catalyzed transition states</b> | <b>S35</b> |
| <b>Energies of Optimized Molecular Structures</b>                                                    | <b>S36</b> |
| <b>Reference</b>                                                                                     | <b>S37</b> |
| <b>Cartesian Coordinates</b>                                                                         | <b>S38</b> |

## Experimental part:

### Materials and Methods

All commercial materials (Alfa Aesar, Aladdin, J&K Chemical LTD, Energy Chemical.) were used without further purification. All solvents were analytical grade. The potassium persulfate and potassium carbonate were ground to powder. All benzoic acids, anilines, *N*-methylanilines, benzyl bromide were purchased. The 2-deuteriobenzoic acid was prepared by Daugulis' procedure<sup>[1]</sup>. The 2-deuterioaniline was prepared by Xi's procedure<sup>[2]</sup>. The <sup>1</sup>H NMR and <sup>13</sup>C NMR spectra were recorded on a Bruker AVANCE<sup>III</sup> 400 MHz spectrometer in CD<sub>3</sub>OD, CDCl<sub>3</sub> or (CD<sub>3</sub>)<sub>2</sub>SO using solvent peak as a standard. All <sup>13</sup>C NMR spectra were recorded with complete proton decoupling.

Low-resolution mass spectral analyses were performed with an Agilent 6340 or Waters AQUITY UPLC<sup>TM</sup>/MS. All reactions were carried out in sealed tube with Teflon cap. Analytical TLC was performed on Yantai Chemical Industry Research Institute silica gel 60 F254 plates and flash column chromatography was performed on Qingdao Haiyang Chemical Co. Ltd silica gel 60 (200-300mesh). The rotavapor was BUCHI's Rotavapor R-3.

### General procedure for benzanilides preparation<sup>[3]</sup>

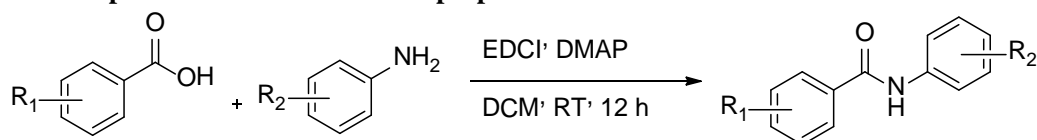

A mixture of benzoic acid (15 mmol), EDCI (16.5 mmol), DMAP (1.5 mmol) in DCM (30 ml) was stirred in a round bottom flask at room temperature for 15 min. Then, aniline (13.5 mmol) was added slowly. The reaction mixture was stirred for 12 h at room temperature. The reaction was quenched by water and the mixture was washed once with saturated aqueous NaHCO<sub>3</sub>, extracted with DCM. The organic layer was dried over anhydrous Na<sub>2</sub>SO<sub>4</sub>, and evaporated in vacuum to afford the crude product, which was further purified by filtration.

### General procedure for *N*-methyl-benzanilides preparation<sup>[4]</sup>

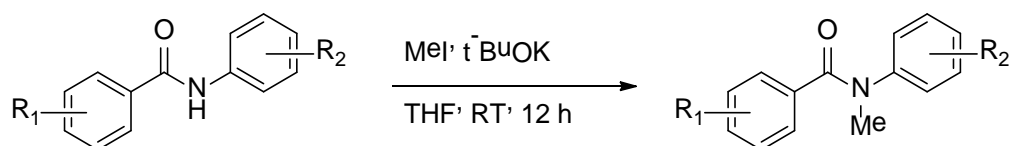

A mixture of benzanilide (8 mmol) and t-BuOK (9.6 mmol) in THF (20 ml) was stirred in a round bottom flask at room temperature for 15 min. Then, MeI (9.6 mmol) was added slowly. The reaction mixture was stirred for 12 h at room temperature. The reaction was quenched by water and the mixture was washed once with saturated aqueous NaHCO<sub>3</sub>, extracted by DCM. The organic layer was dried over anhydrous Na<sub>2</sub>SO<sub>4</sub>, and evaporated in vacuum to afford the crude product, which was further purified by silica gel column chromatography (petroleum ether: ethyl acetate = 4: 1) to give the *N*-methyl-benzanilide.

### General procedure for *N*-benzyl-benzanilides preparation<sup>[4]</sup>

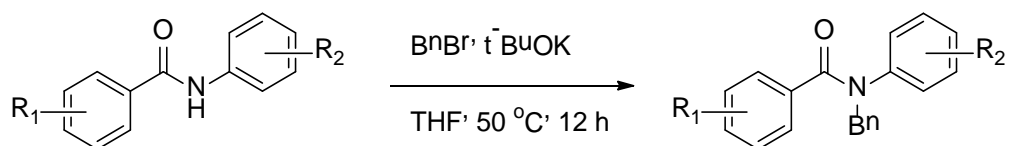

A mixture of benzanilide (2 mmol) and t-BuOK (2.4 mmol) in THF (10 ml) was stirred in a round bottom flask at room temperature for 15 min. Then, BnBr (2.4 mmol) was added slowly. The reaction mixture was stirred for 12 h

at 50 °C. The reaction was quenched by water and the mixture was washed once with saturated aqueous NaHCO<sub>3</sub>, extracted by DCM. The organic layer was dried over anhydrous Na<sub>2</sub>SO<sub>4</sub>, and evaporated in vacuum to afford the crude product, which was further purified by silica gel column chromatography (petroleum ether: ethyl acetate = 6: 1) to give the *N*-benzyl-benzanilide.

### I General procedure for ruthenium-catalyzed hydroxylation of benzanilides

To a 15 ml sealed-tube were added benzanilide (0.10 mmol, 1.0 equiv), K<sub>2</sub>S<sub>2</sub>O<sub>8</sub> (0.30 mmol, 3.0 equiv), [Ru(*p*-cymene)Cl<sub>2</sub>]<sub>2</sub> (0.005 mmol, 0.05 equiv) and TFAA (0.1 ml). The mixture was stirred at room temperature for 2 min. Then, TFA (0.9 ml) was added. The tube was sealed and heated. The reaction was monitored by TLC (n-hexane: acetone = 4: 1). After completion of the reaction, dichloromethane was added to dilute the reaction mixture and saturated aqueous NaHCO<sub>3</sub> was added to neutralize TFA and TFAA. Then the organic layer was dried over anhydrous Na<sub>2</sub>SO<sub>4</sub> and concentrated on rotavapor under reduced pressure. Finally, the residue was purified by silica gel column chromatography to give the desired product.

### II General procedure for palladium-catalyzed hydroxylation of benzanilides

To a 15 ml sealed-tube were added benzanilide (0.10 mmol, 1.0 equiv), K<sub>2</sub>S<sub>2</sub>O<sub>8</sub> (0.20 mmol, 2.0 equiv), Pd(OAc)<sub>2</sub> (0.01 mmol, 0.1 equiv) and TFAA (0.1 ml). The mixture was stirred at room temperature for 2 min. Then, TFA (0.9 ml) was added. The tube was sealed and heated. The reaction was monitored by TLC (n-hexane: acetone = 4: 1). After completion of the reaction, dichloromethane was added to dilute the reaction mixture and saturated aqueous NaHCO<sub>3</sub> was added to neutralize TFA and TFAA. Then the organic layer was dried over anhydrous Na<sub>2</sub>SO<sub>4</sub> and concentrated on rotavapor under reduced pressure. Finally, the residue was purified by silica gel column chromatography to give the desired product.

### Procedure for gram scale reactions

#### 1. 2-Hydroxy-*N*-methyl-*N*-phenylbenzamide ( **2b** )

To a 100 mL round bottom flask, following the general procedure **I**, *N*-methyl-benzanilide (2.0 g, 9.48 mmol), K<sub>2</sub>S<sub>2</sub>O<sub>8</sub> (7.7 g, 28.44 mmol), [Ru(*p*-cymene)Cl<sub>2</sub>]<sub>2</sub> (145 mg, 0.24 mmol), TFAA (8 ml) and TFA (70 ml) were used. The reaction mixture was stirred at 60 °C for 12 h. After completion of the reaction, the residue was purified by silica gel column chromatography (petroleum ether: ethyl acetate = 10: 1). Finally, compound ( **2b** ) (1.9 g) was isolated in 90% yield.

#### 2. *N*-(2-hydroxyphenyl)-*N*-methylbenzamide ( **2a** )

To a 100 mL round bottom flask, following the general procedure **II**, *N*-methyl-benzanilide (2.0 g, 9.48 mmol), K<sub>2</sub>S<sub>2</sub>O<sub>8</sub> (7.7 g, 28.44 mmol) or Pd(OAc)<sub>2</sub> (107 mg, 0.47 mmol), TFAA (8 ml) and TFA (70 ml) were used. The reaction mixture was stirred at 60 °C for 1.5 h. After completion of the reaction, the residue was purified by silica gel column chromatography (petroleum ether: ethyl acetate = 4: 1). Finally, compound ( **2a** ) (1.3 g) was isolated in 61% yield.

### Procedure for preliminary mechanistic study

#### 1. Intermolecular Experiments

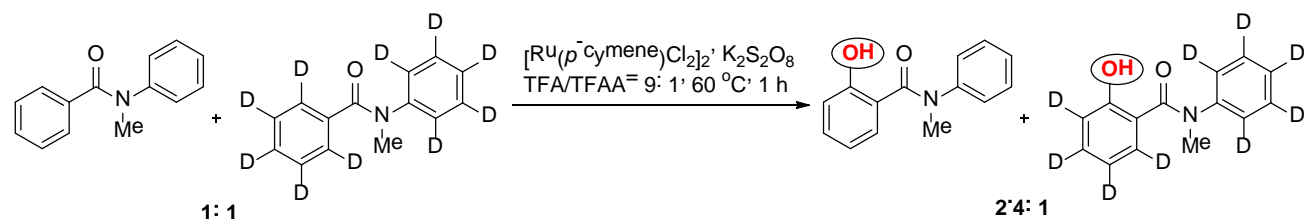

To a 15 ml sealed-tube were added *N*-methyl-benzanilide (10.6 mg, 0.05 mmol), *N*-methyl-benzanilide – d10 (11.1 mg, 0.05 mmol),  $K_2S_2O_8$  (54 mg, 0.20 mmol),  $[Ru(p\text{-cymene})Cl_2]_2$  (3.1 mg, 0.005 mmol), TFAA (0.1 ml). The mixture was stirred at room temperature for 2 min. Then, TFA (0.9 ml) was added. The tube was sealed and heated at 60 °C for 1 h. The reaction mixture was cooled to room temperature. Then dichloromethane was added to dilute the reaction mixture and saturated aqueous  $NaHCO_3$  was added to neutralize TFA and TFAA. The organic layer was dried over anhydrous  $Na_2SO_4$  and concentrated on rotavapor under reduced pressure. The residue was purified by silica gel column chromatography (n-hexane: acetone= 10: 1)  $^1H$ -NMR shows  $k_H/k_D = 2.4: 1$ .

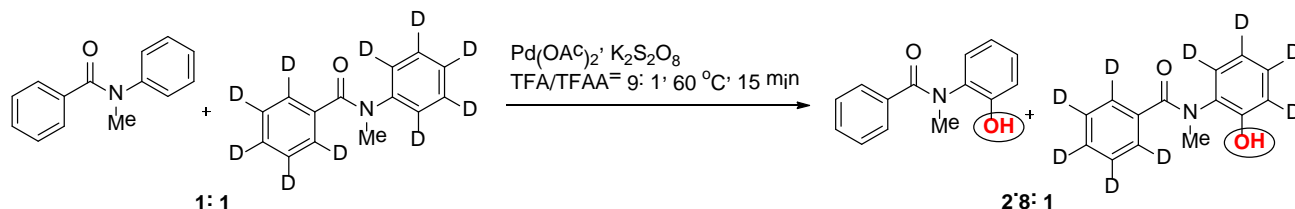

To a 15 ml sealed-tube were added *N*-methyl-benzanilide (10.6 mg, 0.05 mmol), *N*-methyl-benzanilide – d10 (11.1 mg, 0.05 mmol),  $K_2S_2O_8$  (54 mg, 0.20 mmol),  $Pd(OAc)_2$  (2.3 mg, 0.01 mmol), TFAA (0.1 ml). The mixture was stirred at room temperature for 2 min. Then, TFA (0.9 ml) was added. The tube was sealed and heated at 60 °C for 15 min. The reaction mixture was cooled to room temperature. Then dichloromethane was added to dilute the reaction mixture and saturated aqueous  $NaHCO_3$  was added to neutralize TFA and TFAA. The organic layer was dried over anhydrous  $Na_2SO_4$  and concentrated on rotavapor under reduced pressure. The residue was purified by silica gel column chromatography (n-hexane: acetone= 6: 1)  $^1H$ -NMR shows  $k_H/k_D = 2.8: 1$ .

## 2. Intramolecular Experiments

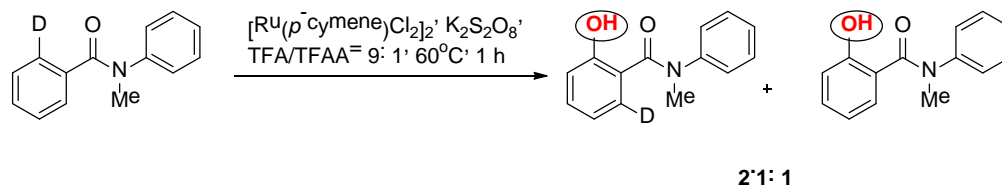

To a 15 ml sealed-tube were added 2-deuterio-*N*-methyl-*N*-phenylbenzamide (21 mg, 0.10 mmol),  $K_2S_2O_8$  (54 mg, 0.20 mmol),  $[Ru(p\text{-cymene})Cl_2]_2$  (3.1 mg, 0.005 mmol), TFAA (0.1 ml). The mixture was stirred at room temperature for 2 min. Then, TFA (0.9 ml) was added. The tube was sealed and heated at 60 °C for 1 h. The reaction mixture was cooled to room temperature. Then dichloromethane was added to dilute the reaction mixture and saturated aqueous  $NaHCO_3$  was added to neutralize TFA and TFAA. The organic layer was dried over anhydrous  $Na_2SO_4$  and concentrated on rotavapor under reduced pressure. The residue was purified by silica gel column chromatography (n-hexane: acetone= 10: 1)  $^1H$ -NMR shows  $k_H/k_D = 2.1: 1$ .

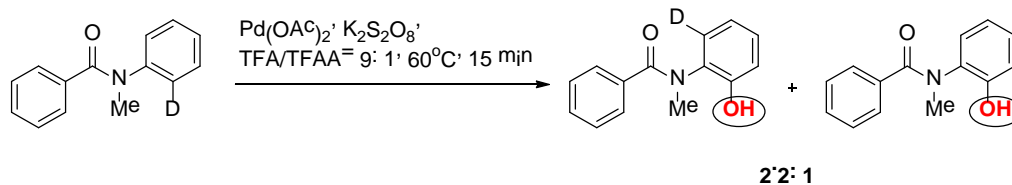

To a 15 ml sealed-tube were added *N*-(2-deuteriophenyl)-*N*-methylbenzamide (21 mg, 0.10 mmol),  $K_2S_2O_8$  (54 mg, 0.20 mmol),  $Pd(OAc)_2$  (2.3 mg, 0.01 mmol), TFAA (0.1 ml). The mixture was stirred at room temperature for 2 min. Then, TFA (0.9 ml) was added. The tube was sealed and heated at 60 °C for 15 min. The reaction mixture was cooled to room temperature. Then dichloromethane was added to dilute the reaction mixture and saturated aqueous  $NaHCO_3$  was added to neutralize TFA and TFAA. The organic layer was dried over anhydrous  $Na_2SO_4$  and concentrated on rotavapor under reduced pressure. The residue was purified by silica gel column chromatography

(n-hexane: acetone= 6: 1) <sup>1</sup>H-NMR shows k<sub>H</sub>/k<sub>D</sub> = 2.2: 1.

## References

- (1) H. A. Chiong, Q. N. Pham and O. Daugilis, *J. Am. Chem. Soc.*, 2007, **129**, 9879.
- (2) Y. Chi, W. X. Zhang and Z. F. Xi, *Org. Lett.*, 2014, **16**, 6274.
- (3) X. Q. Hao, L. J. Chen, B. Z. Ren, L. Y. Li, X. Y. Yang, J. F. Gong, J. L. Niu and M. P. Song, *Org. Lett.*, 2014, **16**, 1104.
- (4) T. Y. Luh and S. H. Fung, *Synthetic Communications*, 1979, **9**, 757.

**Table S1.** Optimization of the Reaction Conditions with [Ru(*p*-cymene)Cl<sub>2</sub>]<sub>2</sub> as Catalyst

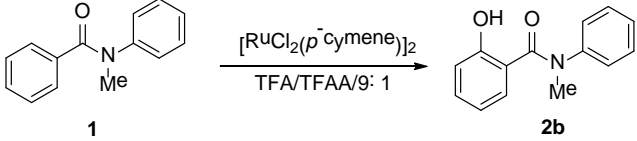

| entry | equiv of catalyst | oxidant                                                                | condition  | yield <sup>a</sup> (%) |
|-------|-------------------|------------------------------------------------------------------------|------------|------------------------|
| 1     | 0.05              | K <sub>2</sub> S <sub>2</sub> O <sub>8</sub> (3.0 eq)                  | 60 °C: 5 h | 87                     |
| 2     | 0.05              | K <sub>2</sub> S <sub>2</sub> O <sub>8</sub> (3.0 eq)                  | 60 °C: 7 h | 85                     |
| 3     | 0.025             | K <sub>2</sub> S <sub>2</sub> O <sub>8</sub> (3.0 eq)                  | 60 °C: 6 h | 67                     |
| 4     | 0.01              | K <sub>2</sub> S <sub>2</sub> O <sub>8</sub> (3.0 eq)                  | 60 °C: 6 h | 57                     |
| 5     | 0.05              | K <sub>2</sub> S <sub>2</sub> O <sub>8</sub> (2.0 eq)                  | 60 °C: 6 h | 70                     |
| 6     | 0.05              | K <sub>2</sub> S <sub>2</sub> O <sub>8</sub> (1.5 eq)                  | 60 °C: 6 h | 28                     |
| 7     | 0.05              | K <sub>2</sub> S <sub>2</sub> O <sub>8</sub> (3.0 eq)                  | 25 °C: 6 h | 0                      |
| 8     | 0.05              | K <sub>2</sub> S <sub>2</sub> O <sub>8</sub> (3.0 eq)                  | 50 °C: 6 h | 49                     |
| 9     | 0.05              | K <sub>2</sub> S <sub>2</sub> O <sub>8</sub> (3.0 eq)                  | 70 °C: 6 h | 65                     |
| 10    | 0.05              | K <sub>2</sub> S <sub>2</sub> O <sub>8</sub> (3.0 eq)                  | 80 °C: 6 h | 28                     |
| 11    | 0.05              | selectfluor(3.0 eq)                                                    | 60 °C: 6 h | 0                      |
| 12    | 0.05              | NFPy-TfO(3.0 eq)                                                       | 60 °C: 6 h | 0                      |
| 13    | 0.05              | NaIO <sub>4</sub> (3.0 eq)                                             | 60 °C: 6 h | 0                      |
| 14    | 0.05              | PhI(OAc) <sub>2</sub> (3.0 eq)                                         | 60 °C: 6 h | trace                  |
| 15    | 0.05              | Na <sub>2</sub> S <sub>2</sub> O <sub>8</sub> (3.0 eq)                 | 60 °C: 6 h | 0                      |
| 16    | 0.05              | (NH <sub>4</sub> ) <sub>2</sub> S <sub>2</sub> O <sub>8</sub> (3.0 eq) | 60 °C: 6 h | 58                     |
| 17    | 0.05              | KIO <sub>3</sub> (3.0 eq)                                              | 60 °C: 6 h | trace                  |

<sup>a</sup> Conversion ratio.

**Table S2.** Optimization of the Reaction Conditions with Pd(OAc)<sub>2</sub> as Catalyst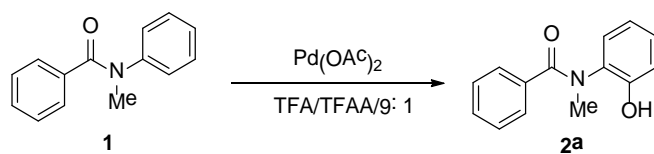

| entry | equiv of catalyst | oxidant                                                                | condition     | yield <sup>a</sup> (%) |
|-------|-------------------|------------------------------------------------------------------------|---------------|------------------------|
| 1     | 0.1               | K <sub>2</sub> S <sub>2</sub> O <sub>8</sub> (2.0 eq)                  | 60 °C: 20 min | 52                     |
| 2     | 0.1               | K <sub>2</sub> S <sub>2</sub> O <sub>8</sub> (2.0 eq)                  | 60 °C: 1 h    | 61                     |
| 3     | 0.05              | K <sub>2</sub> S <sub>2</sub> O <sub>8</sub> (2.0 eq)                  | 60 °C: 0.5 h  | 42                     |
| 4     | 0.025             | K <sub>2</sub> S <sub>2</sub> O <sub>8</sub> (2.0 eq)                  | 60 °C: 0.5 h  | 18                     |
| 5     | 0.1               | K <sub>2</sub> S <sub>2</sub> O <sub>8</sub> (1.5 eq)                  | 60 °C: 0.5 h  | 31                     |
| 6     | 0.1               | K <sub>2</sub> S <sub>2</sub> O <sub>8</sub> (1.0 eq)                  | 60 °C: 0.5 h  | 15                     |
| 7     | 0.1               | K <sub>2</sub> S <sub>2</sub> O <sub>8</sub> (2.0 eq)                  | 25 °C: 0.5 h  | 28                     |
| 8     | 0.1               | K <sub>2</sub> S <sub>2</sub> O <sub>8</sub> (2.0 eq)                  | 50 °C: 0.5 h  | 50                     |
| 9     | 0.1               | K <sub>2</sub> S <sub>2</sub> O <sub>8</sub> (2.0 eq)                  | 70 °C: 0.5 h  | 16                     |
| 10    | 0.1               | K <sub>2</sub> S <sub>2</sub> O <sub>8</sub> (2.0 eq)                  | 80 °C: 0.5 h  | 9                      |
| 11    | 0.1               | selectfluor(2.0 eq)                                                    | 60 °C: 0.5 h  | trace                  |
| 12    | 0.1               | NFPy TfO(2.0 eq)                                                       | 60 °C: 0.5 h  | 30                     |
| 13    | 0.1               | NaIO <sub>4</sub> (2.0 eq)                                             | 60 °C: 0.5 h  | 27                     |
| 14    | 0.1               | PhI(OAc) <sub>2</sub> (2.0 eq)                                         | 60 °C: 0.5 h  | 16                     |
| 15    | 0.1               | Na <sub>2</sub> S <sub>2</sub> O <sub>8</sub> (2.0 eq)                 | 60 °C: 0.5 h  | 0                      |
| 16    | 0.1               | (NH <sub>4</sub> ) <sub>2</sub> S <sub>2</sub> O <sub>8</sub> (2.0 eq) | 60 °C: 0.5 h  | 0                      |
| 17    | 0.1               | KIO <sub>3</sub> (2.0 eq)                                              | 60 °C: 0.5 h  | 0                      |

<sup>a</sup> Conversion ratio.

### Data of products

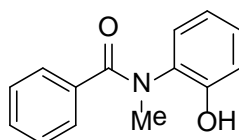

#### *N*-(2-hydroxyphenyl)-*N*-methylbenzamide ( **2a** )

Following the general procedure **II**, *N*-methyl-*N*-phenylbenzamide (22 mg, 0.1 mmol), K<sub>2</sub>S<sub>2</sub>O<sub>8</sub> (54 mg, 0.2 mmol) and Pd(OAc)<sub>2</sub> (10 mol%, 0.01 mmol) were used with TFA: TFAA= 0.9 ml: 0.1 ml as solvent. The reaction mixture was stirred at 60 °C. in the sealed tube for 0.5 h. After completion of the reaction, the residue was purified by silica gel column chromatography (n-hexane: acetone= 4: 1). Finally, compound ( **2a** ) (16 mg) was isolated in 70% yield. <sup>1</sup>H-NMR (400 MHz, CD<sub>3</sub>OD) δ (ppm) 7.32 (d, *J* = 7.52 Hz, 2H), 7.22 (t, *J* = 7.00 Hz, 1H), 7.15 (t, *J* = 7.40 Hz, 2H), 7.02 (t, *J* = 7.64 Hz, 1H), 6.93 (d, *J* = 7.76 Hz, 1H), 6.76 (d, *J* = 8.08 Hz, 1H), 6.65 (t, *J* = 7.52 Hz, 1H), 3.34 (s, 3H); <sup>13</sup>C-NMR (100 MHz, CD<sub>3</sub>OD) δ (ppm) 174.1, 154.0, 137.6, 132.9, 130.7, 130.4, 130.1, 128.8, 128.6, 120.8, 117.4, 37.2; LRMS (ESI) calcd for C<sub>14</sub>H<sub>13</sub>NO<sub>2</sub>[M+H]<sup>+</sup>: 228.09, found 228.38.

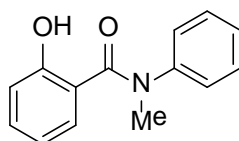

#### 2-Hydroxy-*N*-methyl-*N*-phenylbenzamide ( **2b** )

Following the general procedure **I**, *N*-methyl-*N*-phenylbenzamide (22 mg, 0.1mmol), K<sub>2</sub>S<sub>2</sub>O<sub>8</sub> (81 mg, 0.3 mmol) and [RuCl<sub>2</sub>(*p*-cymene)]<sub>2</sub> (5 mol%, 0.005 mmol) were used with TFA: TFAA= 0.9 ml: 0.1 ml as solvent. The

reaction mixture was stirred at 60 °C in the sealed tube for 6 h. After completion of the reaction, the residue was purified by silica gel column chromatography (n-hexane: acetone= 10: 1). Finally, compound ( **2b** ) (21 mg) was isolated in 93% yield. <sup>1</sup>H-NMR (400 MHz, (CD<sub>3</sub>)<sub>2</sub>CO) δ (ppm) 10.51 (s, 1H), 7.35 (t, *J* = 7.52 Hz, 2H), 7.24 - 7.27 (m, 3H), 7.16 (t, *J* = 7.68 Hz, 1H), 6.80 – 6.84 (m, 2H), 6.46 (t, *J* = 7.48 Hz, 1H), 3.44 (s, 3H); <sup>13</sup>C-NMR (100 MHz, (CD<sub>3</sub>)<sub>2</sub>CO) δ (ppm) 171.6, 160.2, 146.1, 132.9, 130.9, 130.3, 127.9, 127.8, 119.1, 118.7, 118.7, 118.0, 117.9, 39.1; LRMS (ESI) calcd for C<sub>14</sub>H<sub>13</sub>NO<sub>2</sub>[M+H]<sup>+</sup>: 228.09, found 228.38.

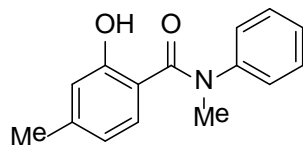

### 2-Hydroxy-*N*,4-dimethyl-*N*-phenylbenzamide ( **3a** )

Following the general procedure **I**, *N*,4-dimethyl-*N*-phenylbenzamide (23 mg, 0.1 mmol), K<sub>2</sub>S<sub>2</sub>O<sub>8</sub> (81 mg, 0.3 mmol) and [RuCl<sub>2</sub>(*p*-cymene)]<sub>2</sub> (5 mol%, 0.005 mmol) were used with TFA: TFAA= 0.9 ml: 0.1 ml as solvent. The reaction mixture was stirred at 60 °C. in the sealed tube for 5 h. After completion of the reaction, the residue was purified by silica gel column chromatography (n-hexane: acetone= 10: 1). Finally, compound ( **3a** ) (22 mg) was isolated in 91% yield. <sup>1</sup>H-NMR (400 MHz, CD<sub>3</sub>OD) δ (ppm) 7.25 (t, *J* = 7.64 Hz, 2H), 7.16 – 7.20 (m, 3H), 6.85 (d, *J* = 7.80 Hz, 1H), 6.52 (s, 1H), 6.44 (d, *J* = 7.84 Hz, 1H), 3.41 (s, 3H), 2.17 (s, 3H); <sup>13</sup>C-NMR (100 MHz, CD<sub>3</sub>OD) δ (ppm) 172.7, 156.5, 145.6, 142.8, 130.0, 129.9, 128.1, 127.9, 120.9, 120.6, 117.4, 38.5, 21.4; LRMS (ESI) calcd for C<sub>15</sub>H<sub>15</sub>NO<sub>2</sub>[M+H]<sup>+</sup>: 242.11, found 242.42.

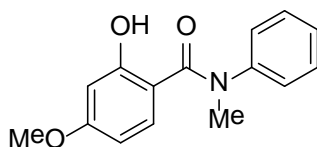

### 2-Hydroxy-4-methoxy-*N*-methyl-*N*-phenylbenzamide ( **3b** )

Following the general procedure **I**, 4-methoxy-*N*-methyl-*N*-phenylbenzamide (25 mg, 0.1 mmol), K<sub>2</sub>S<sub>2</sub>O<sub>8</sub> (81 mg, 0.3 mmol) and [RuCl<sub>2</sub>(*p*-cymene)]<sub>2</sub> (5 mol%, 0.005 mmol) were used with TFA: TFAA= 0.9 ml: 0.1 ml as solvent. The reaction mixture was stirred at 60 °C. in the sealed tube for 5 h. After completion of the reaction, the residue was purified by silica gel column chromatography (n-hexane: acetone= 10: 1). Finally, compound ( **3b** ) (22 mg) was isolated in 86% yield. <sup>1</sup>H-NMR (400 MHz, CD<sub>3</sub>OD) δ (ppm) 7.29 (t, *J* = 7.56 Hz, 2H), 7.17 – 7.22 (m, 3H), 6.84 (d, *J* = 8.68 Hz, 1H), 6.27 (d, *J* = 2.32 Hz, 1H), 6.14 (dd, *J* = 8.72 Hz, *J* = 2.32 Hz, 1H), 3.68 (s, 3H), 3.41 (s, 3H); <sup>13</sup>C-NMR (100 MHz, CD<sub>3</sub>OD) δ (ppm) 172.7, 163.8, 159.7, 146.1, 131.7, 130.2, 128.0, 127.9, 114.8, 106.0, 102.1, 49.0, 38.8; LRMS (ESI) calcd for C<sub>15</sub>H<sub>15</sub>NO<sub>3</sub>[M+H]<sup>+</sup>: 258.11, found 258.41.

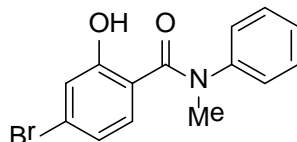

### 4-Bromo-2-hydroxy-*N*-methyl-*N*-phenylbenzamide ( **3c** )

Following the general procedure **I**, 4-bromo-*N*-methyl-*N*-phenylbenzamide (29 mg, 0.1 mmol), K<sub>2</sub>S<sub>2</sub>O<sub>8</sub> (81 mg, 0.3 mmol) and [RuCl<sub>2</sub>(*p*-cymene)]<sub>2</sub> (5 mol%, 0.005 mmol) were used with TFA: TFAA= 0.9 ml: 0.1 ml as solvent. The reaction mixture was stirred at 60 °C. in the sealed tube for 4 h. After completion of the reaction, the residue was purified by silica gel column chromatography (n-hexane: acetone= 10: 1). Finally, compound ( **3c** ) (22 mg) was isolated in 72% yield. <sup>1</sup>H-NMR (400 MHz, CD<sub>3</sub>OD) δ (ppm) 7.26 (t, *J* = 8.08 Hz, 2H), 7.17 - 7.21 (m, 3H), 6.94 (d, *J* = 8.04 Hz, 1H), 6.84 (s, 1H), 6.80 (d, *J* = 8.00 Hz, 1H), 3.41 (s, 3H); <sup>13</sup>C-NMR (100 MHz, CD<sub>3</sub>OD) δ (ppm) 171.3, 156.6, 145.0, 131.1, 130.0, 128.4, 127.9, 124.7, 124.1, 122.9, 120.0, 38.2; LRMS (ESI) calcd for



$C_{14}H_{12}BrNO_2[M+H]^+$ : 306.01, found 306.29.

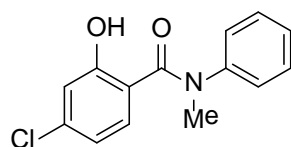

#### 4-Chloro-2-hydroxy-*N*-methyl-*N*-phenylbenzamide ( **3d** )

Following the general procedure **I**, 4-chloro-*N*-methyl-*N*-phenylbenzamide (25 mg, 0.1 mmol),  $K_2S_2O_8$  (81 mg, 0.3 mmol) and  $[RuCl_2(p\text{-cymene})]_2$  (5 mol%, 0.005 mmol) were used with TFA: TFAA= 0.9 ml: 0.1 ml as solvent. The reaction mixture was stirred at 60 °C. in the sealed tube for 7 h. After completion of the reaction, the residue was purified by silica gel column chromatography (n-hexane: acetone= 10: 1). Finally, compound ( **3d** ) (19 mg) was isolated in 73% yield.  $^1H$ -NMR (400 MHz,  $CD_3OD$ )  $\delta$  (ppm) 7.26 (t,  $J$  = 8.16 Hz, 2H), 7.17 – 7.21 (m, 3H), 7.00 (d,  $J$  = 8.08 Hz, 1H), 6.68 (s, 1H), 6.65 (d,  $J$  = 8.48 Hz, 1H), 3.42 (s, 3H);  $^{13}C$ -NMR (100 MHz,  $CD_3OD$ )  $\delta$  (ppm) 171.3, 156.7, 145.0, 136.9, 130.9, 130.1, 128.3, 127.9, 123.7, 119.9, 116.8, 38.2; LRMS (ESI) calcd for  $C_{14}H_{12}ClNO_2[M+H]^+$ : 262.06, found 262.31.

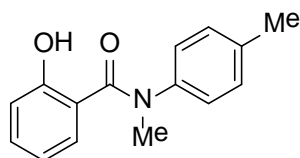

#### 2-Hydroxy-*N*-methyl-*N*-(*p*-tolyl)benzamide ( **3e** )

Following the general procedure **I**, *N*-methyl-*N*-(*p*-tolyl)benzamide (23 mg, 0.1 mmol),  $K_2S_2O_8$  (81 mg, 0.3 mmol) and  $[RuCl_2(p\text{-cymene})]_2$  (5 mol%, 0.005 mmol) were used with TFA: TFAA= 0.9 ml: 0.1 ml as solvent. The reaction mixture was stirred at 60 °C. in the sealed tube for 5 h. After completion of the reaction, the residue was purified by silica gel column chromatography (n-hexane: acetone= 10: 1). Finally, compound ( **3e** ) (19 mg) was isolated in 81% yield.  $^1H$ -NMR (400 MHz,  $CD_3OD$ )  $\delta$  (ppm) 7.09 – 6.98 (m, 6H), 6.68 (d,  $J$  = 8.20 Hz, 1H), 6.63 (t,  $J$  = 7.32 Hz, 1H), 3.39 (s, 3H), 2.24 (s, 3H);  $^{13}C$ -NMR (100 MHz,  $CD_3OD$ )  $\delta$  (ppm) 172.4, 155.9, 142.7, 138.2, 131.8, 130.5, 129.7, 127.6, 124.5, 119.8, 116.8, 38.4, 21.0; LRMS (ESI) calcd for  $C_{15}H_{15}NO_2[M+H]^+$ : 242.11, found 242.37.

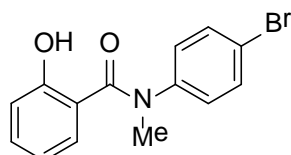

#### *N*-(4-bromophenyl)-2-hydroxy-*N*-methylbenzamide ( **3f** )

Following the general procedure **I**, *N*-(4-bromophenyl)-*N*-methylbenzamide (29 mg, 0.1 mmol),  $K_2S_2O_8$  (81 mg, 0.3 mmol) and  $[RuCl_2(p\text{-cymene})]_2$  (5 mol%, 0.005 mmol) were used with TFA: TFAA= 0.9 ml: 0.1 ml as solvent. The reaction mixture was stirred at 60 °C. in the sealed tube for 6 h. After completion of the reaction, the residue was purified by silica gel column chromatography (n-hexane: acetone= 10: 1). Finally, compound ( **3f** ) (23 mg) was isolated in 75% yield.  $^1H$ -NMR (400 MHz,  $CD_3OD$ )  $\delta$  (ppm) 7.38 (d,  $J$  = 8.64 Hz, 2H), 7.13 (d,  $J$  = 8.64 Hz, 2H), 7.06 - 7.14 (m, 2H), 6.67 – 6.73 (m, 2H), 3.40 (s, 3H);  $^{13}C$ -NMR (100 MHz,  $CD_3OD$ )  $\delta$  (ppm) 172.2, 155.5, 144.5, 133.0, 132.0, 129.8, 129.7, 124.6, 121.4, 120.1, 116.8, 38.1; LRMS (ESI) calcd for  $C_{14}H_{12}BrNO_2[M+H]^+$ : 306.01, found 306.29.

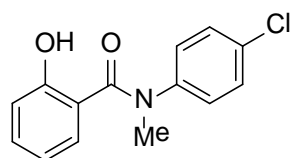

### ***N*-(4-chlorophenyl)-2-hydroxy-*N*-methylbenzamide ( 3g )**

Following the general procedure I, *N*-(4-chlorophenyl)-*N*-methylbenzamide (25 mg, 0.1 mmol), K<sub>2</sub>S<sub>2</sub>O<sub>8</sub> (81 mg, 0.3 mmol) and [RuCl<sub>2</sub>(*p*-cymene)]<sub>2</sub> (5 mol%, 0.005 mmol) were used with TFA: TFAA= 0.9 ml: 0.1 ml as solvent. The reaction mixture was stirred at 60 °C. in the sealed tube for 5 h. After completion of the reaction, the residue was purified by silica gel column chromatography (n-hexane: acetone= 10: 1). Finally, compound ( 3g ) (24.5 mg) was isolated in 94% yield. <sup>1</sup>H-NMR (400 MHz, (CD<sub>3</sub>)<sub>2</sub>SO) δ (ppm) 7.28 (d, *J* = 8.00 Hz, 2H), 7.21 (d, *J* = 8.00 Hz, 2H), 7.05 – 7.09 (m, 2H), 6.66 – 6.70 (m, 2H), 3.29 (s, 3H); <sup>13</sup>C-NMR (100 MHz, (CD<sub>3</sub>)<sub>2</sub>SO) δ (ppm) 168.3, 153.3, 142.7, 130.5, 130.1, 128.4, 128.3, 128.2, 124.4, 118.5, 115.6, 36.8; LRMS (ESI) calcd for C<sub>14</sub>H<sub>12</sub>ClNO<sub>2</sub>[M+H]<sup>+</sup>: 262.06, found 262.36.

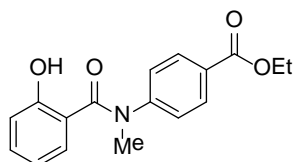

### **Ethyl 4-(2-hydroxy-*N*-methylbenzamido)benzoate ( 3h )**

Following the general procedure I, ethyl 4-(*N*-methylbenzamido)benzoate (29 mg, 0.1mmol), K<sub>2</sub>S<sub>2</sub>O<sub>8</sub> (81 mg, 0.3 mmol) and [RuCl<sub>2</sub>(*p*-cymene)]<sub>2</sub> (5 mol%, 0.005 mmol) were used with TFA: TFAA= 0.9 ml: 0.1 ml as solvent. The reaction mixture was stirred at 60 °C. in the sealed tube for 4 h. After completion of the reaction, the residue was purified by silica gel column chromatography (n-hexane: acetone= 10: 1). Finally, compound ( 3h ) (27.4 mg) was isolated in 92% yield. <sup>1</sup>H-NMR (400 MHz, (CD<sub>3</sub>)<sub>2</sub>SO) δ (ppm) 9.70 (s, 1H), 7.79 (d, *J* = 8.00 Hz, 2H), 7.32 (d, *J* = 8.00 Hz, 2H), 7.08 – 7.11 (m, 2H), 6.66 – 6.71 (m, 2H), 4.26 (q, *J* = 8.00 Hz, 2H), 3.34 (s, 3H), 1.28 (t, *J* = 8.00 Hz, 3H); <sup>13</sup>C-NMR (100 MHz, (CD<sub>3</sub>)<sub>2</sub>SO) δ (ppm) 168.4, 165.1, 153.4, 148.0, 130.4, 129.4, 128.5, 127.1, 126.1, 124.3, 118.6, 115.6, 60.7, 36.7, 14.1; LRMS (ESI) calcd for C<sub>17</sub>H<sub>17</sub>NO<sub>4</sub>[M+H]<sup>+</sup>: 300.12, found 300.43.

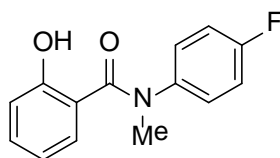

### ***N*-(4-fluorophenyl)-2-hydroxy-*N*-methylbenzamide ( 3i )**

Following the general procedure I, *N*-(4-fluorophenyl)-*N*-methylbenzamide (23 mg, 0.1 mmol), K<sub>2</sub>S<sub>2</sub>O<sub>8</sub> (81 mg, 0.3 mmol) and [RuCl<sub>2</sub>(*p*-cymene)]<sub>2</sub> (5 mol%, 0.005 mmol) were used with TFA: TFAA= 0.9 ml: 0.1 ml as solvent. The reaction mixture was stirred at 60 °C. in the sealed tube for 5 h. After completion of the reaction, the residue was purified by silica gel column chromatography (n-hexane: acetone= 10: 1). Finally, compound ( 3i ) (20 mg) was isolated in 82% yield. <sup>1</sup>H-NMR (400 MHz, CD<sub>3</sub>OD) δ (ppm) 7.23 (dd, *J* = 8.60 Hz, *J* = 4.88 Hz, 2H), 7.10 (t, *J* = 7.52 Hz, 1H), 7.05 (d, *J* = 7.28 Hz, 1H), 6.94 – 6.98 (m, 2H), 6.66 – 6.71 (m, 2H), 3.40 (s, 3H); <sup>13</sup>C-NMR (100 MHz, (CD<sub>3</sub>)<sub>2</sub>CO) δ (ppm) 171.6, 162.6 (d, *J*<sub>C-F</sub> = 244 Hz), 155.4, 141.4 131.8, 129.9 (d, *J*<sub>C-F</sub> = 8 Hz), 129.6, 124.7, 120.0, 116.7 (d, *J*<sub>C-F</sub> = 14 Hz), 116.4, 38.3; LRMS (ESI) calcd for C<sub>14</sub>H<sub>12</sub>FNO<sub>2</sub>[M+H]<sup>+</sup>: 246.09, found 246.37.

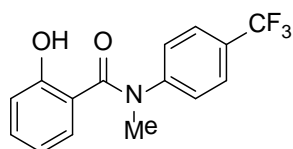

### **2-Hydroxy-*N*-methyl-*N*-(4-(trifluoromethyl)phenyl)benzamide ( 3j )**

Following the general procedure I, *N*-methyl-*N*-(4-(trifluoromethyl)phenyl)benzamide (28 mg, 0.1 mmol), K<sub>2</sub>S<sub>2</sub>O<sub>8</sub> (81 mg, 0.3 mmol) and [RuCl<sub>2</sub>(*p*-cymene)]<sub>2</sub> (5 mol%, 0.005 mmol) were used with TFA: TFAA= 0.9 ml: 0.1 ml as solvent. The reaction mixture was stirred at 60 °C. in the sealed tube for 6 h. After completion of the reaction, the residue was purified by silica gel column chromatography (n-hexane: acetone= 10: 1). Finally, compound ( 3j ) (28

mg) was isolated in 95% yield. <sup>1</sup>H-NMR (400 MHz, CD<sub>3</sub>OD) δ (ppm) 7.54 (d, *J* = 8.40 Hz, 2H), 7.39 (d, *J* = 8.36 Hz, 2H), 7.11 – 7.15 (m, 2H), 6.73 (t, *J* = 7.52 Hz, 1H), 6.68 (d, *J* = 8.08 Hz, 1H), 3.45 (s, 3H); <sup>13</sup>C-NMR (100 MHz, CD<sub>3</sub>OD) δ (ppm) 172.2, 155.4, 148.7, 132.3, 129.8, 129.6 (q, *J*<sub>C-F</sub> = 32 Hz), 128.4, 126.8 (q, *J*<sub>C-F</sub> = 4 Hz), 125.4 (q, *J*<sub>C-F</sub> = 270 Hz), 124.4, 120.2, 116.8, 37.9; LRMS (ESI) calcd for C<sub>15</sub>H<sub>12</sub>F<sub>3</sub>NO<sub>2</sub>[M+H]<sup>+</sup>: 296.08, found 296.39.

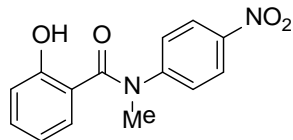

### 2-Hydroxy-*N*-methyl-*N*-(4-nitrophenyl)benzamide ( **3k** )

Following the general procedure **I**, *N*-methyl-*N*-(4-nitrophenyl)benzamide (26 mg, 0.1mmol), K<sub>2</sub>S<sub>2</sub>O<sub>8</sub> (81 mg, 0.3mmol) and [RuCl<sub>2</sub>(*p*-cymene)]<sub>2</sub> (5 mol%, 0.005 mmol) were used with TFA: TFAA= 0.9 ml: 0.1 ml as solvent. The reaction mixture was stirred at 60 °C. in the sealed tube for 6 h. After completion of the reaction, the residue was purified by silica gel column chromatography (n-hexane: acetone= 10: 1). Finally, compound ( **3k** ) (19.2 mg) was isolated in 71 % yield. <sup>1</sup>H-NMR (400 MHz, CDCl<sub>3</sub>) δ (ppm) 10.33 (s, 1H), 8.17 (d, *J* = 8.92 Hz, 2H), 7.22 – 7.27 (m, 3H), 6.97 (d, *J* = 8.32 Hz, 1H), 6.68 (dd, *J* = 7.96 Hz, *J* = 1.08 Hz, 1H), 7.40 (t, *J* = 8.32 Hz, 1H), 3.55 (s, 3H); <sup>13</sup>C-NMR (100 MHz, CDCl<sub>3</sub>) δ (ppm) 172.1, 160.6, 160.4, 151.0, 145.7, 133.7, 130.3, 126.8, 125.1, 118.4, 118.4, 115.6, 39.5; LRMS (ESI) calcd for C<sub>14</sub>H<sub>12</sub>N<sub>2</sub>O<sub>4</sub>[M+H]<sup>+</sup>: 273.08, found 273.38.

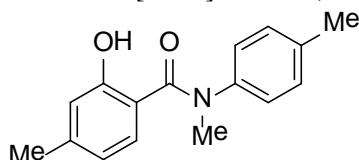

### 2-Hydroxy-*N*,4-dimethyl-*N*-(*p*-tolyl)benzamide ( **3l** )

Following the general procedure **I**, *N*-4-dimethyl-*N*-(*p*-tolyl)benzamide (24 mg, 0.1 mmol), K<sub>2</sub>S<sub>2</sub>O<sub>8</sub> (81 mg, 0.3 mmol) and [RuCl<sub>2</sub>(*p*-cymene)]<sub>2</sub> (5 mol%, 0.005 mmol) were used with TFA: TFAA= 0.9 ml: 0.1 ml as solvent. The reaction mixture was stirred at 60 °C. in the sealed tube for 4 h. After completion of the reaction, the residue was purified by silica gel column chromatography (n-hexane: acetone= 10: 1). Finally, compound ( **3l** ) (21 mg) was isolated in 82% yield. <sup>1</sup>H-NMR (400 MHz, CD<sub>3</sub>OD) δ (ppm) 7.06 (s, 4H), 6.84 (d, *J* = 7.80 Hz, 1H), 6.52 (s, 1H), 6.43 (d, *J* = 7.76 Hz, 1H), 3.38 (s, 3H), 2.26 (s, 3H), 2.17 (s, 3H); <sup>13</sup>C-NMR (100 MHz, CD<sub>3</sub>OD) δ (ppm) 172.7, 156.5, 143.0, 142.7, 138.1, 130.6, 129.8, 127.6, 120.9, 120.6, 117.4, 38.6, 21.3, 21.0; LRMS (ESI) calcd for C<sub>16</sub>H<sub>17</sub>NO<sub>2</sub>[M+H]<sup>+</sup>: 256.13, found 256.41.

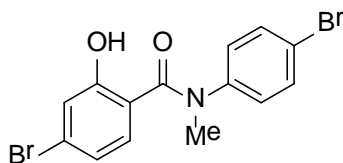

### 4-Bromo-*N*-(4-bromophenyl)-2-hydroxy-*N*-methylbenzamide ( **3m** )

Following the general procedure **I**, 4-bromo-*N*-(4-bromophenyl)-*N*-methylbenzamide (37 mg, 0.1 mmol), K<sub>2</sub>S<sub>2</sub>O<sub>8</sub> (81 mg, 0.3 mmol) and [RuCl<sub>2</sub>(*p*-cymene)]<sub>2</sub> (5 mol%, 0.005 mmol) were used with TFA: TFAA= 0.9 ml: 0.1 ml as solvent. The reaction mixture was stirred at 60 °C. in the sealed tube for 6 h. After completion of the reaction, the residue was purified by silica gel column chromatography (n-hexane: acetone= 10: 1). Finally, compound ( **3m** ) (28 mg) was isolated in 73% yield. <sup>1</sup>H-NMR (400 MHz, CD<sub>3</sub>OD) δ (ppm) 7.40 (d, *J* = 8.52 Hz, 2H), 7.12 (d, *J* = 8.44 Hz, 2H), 7.00 (d, *J* = 7.96 Hz, 1H), 6.86 – 6.88 (m, 2H), 3.39 (s, 3H); <sup>13</sup>C-NMR (100 MHz, CD<sub>3</sub>OD) δ (ppm) 171.1, 156.3, 144.1, 133.1, 131.1, 129.8, 125.0, 124.1, 123.2, 121.7, 119.8, 38.0; LRMS (ESI) calcd for C<sub>14</sub>H<sub>11</sub>Br<sub>2</sub>NO<sub>2</sub>[M+H]<sup>+</sup>: 383.92, found 384.24.

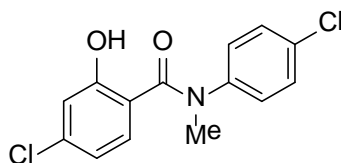

#### 4-Chloro-*N*-(4-chlorophenyl)-2-hydroxy-*N*-methylbenzamide ( **3n** )

Following the general procedure **I**, 4-chloro-*N*-(4-chlorophenyl)-*N*-methylbenzamide (28 mg, 0.1 mmol), K<sub>2</sub>S<sub>2</sub>O<sub>8</sub> (81 mg, 0.3 mmol) and [RuCl<sub>2</sub>(*p*-cymene)]<sub>2</sub> (5 mol%, 0.005 mmol) were used with TFA: TF<sub>3</sub>AA= 0.9 ml: 0.1 ml as solvent. The reaction mixture was stirred at 60 °C. in the sealed tube for 9 h. After completion of the reaction, the residue was purified by silica gel column chromatography (n-hexane: acetone= 10: 1). Finally, compound ( **3n** ) (21 mg) was isolated in 71% yield. <sup>1</sup>H-NMR (400 MHz, CDCl<sub>3</sub>) δ (ppm) 11.05 (s, 1H), 7.32 (d, *J* = 8.00 Hz, 2H), 7.05 (d, *J* = 8.00 Hz, 2H), 6.96 (d, *J* = 4.00 Hz, 1H), 6.58 (d, *J* = 8.00 Hz, 1H), 6.43 (dd, *J* = 8.00 Hz, *J* = 4.00 Hz, 1H), 3.45 (s, 3H); <sup>13</sup>C-NMR (100 MHz, CDCl<sub>3</sub>) δ (ppm) 171.0, 161.8, 143.6, 138.8, 133.3, 131.3, 130.2, 128.0, 118.6, 118.4, 114.2, 39.5; LRMS (ESI) calcd for C<sub>14</sub>H<sub>11</sub>Cl<sub>2</sub>NO<sub>2</sub>[M+H]<sup>+</sup>: 296.02, found 296.34.

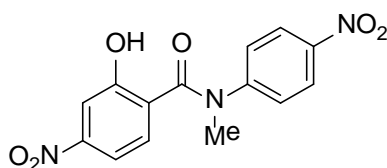

#### 2-Hydroxy-*N*-methyl-4-nitro-*N*-(4-nitrophenyl)benzamide ( **3o** )

Following the general procedure **I**, *N*-methyl-4-nitro-*N*-(4-nitrophenyl)benzamide (31 mg, 0.1 mmol), K<sub>2</sub>S<sub>2</sub>O<sub>8</sub> (81 mg, 0.3 mmol) and [RuCl<sub>2</sub>(*p*-cymene)]<sub>2</sub> (5 mol%, 0.005 mmol) were used with TFA: TF<sub>3</sub>AA= 0.9 ml: 0.1 ml as solvent. The reaction mixture was stirred at 90 °C. in the sealed tube for 6 h. After completion of the reaction, the residue was purified by silica gel column chromatography (n-hexane: acetone= 10: 1). Finally, compound ( **3o** ) (27 mg) was isolated in 85% yield. <sup>1</sup>H-NMR (400 MHz, CD<sub>3</sub>OD) δ (ppm) 8.13 (d, *J* = 8.92 Hz, 2H), 7.65 (dd, *J* = 8.36 Hz, *J* = 1.56 Hz, 1H), 7.45 – 7.50 (m, 4H), 3.50 (s, 3H); <sup>13</sup>C-NMR (100 MHz, CD<sub>3</sub>OD) δ (ppm) 169.7, 155.7, 150.8, 150.1, 147.5, 131.3, 130.9, 128.6, 125.2, 115.2, 111.4, 37.6; LRMS (ESI) calcd for C<sub>14</sub>H<sub>11</sub>N<sub>3</sub>O<sub>6</sub>[M+H]<sup>+</sup>: 318.06, found 318.33.

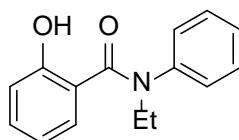

#### *N*-ethyl-2-hydroxy-*N*-phenylbenzamide ( **3p** )

Following the general procedure **I**, *N*-ethyl-*N*-phenylbenzamide (23 mg, 0.1 mmol), K<sub>2</sub>S<sub>2</sub>O<sub>8</sub> (81 mg, 0.3 mmol) and [RuCl<sub>2</sub>(*p*-cymene)]<sub>2</sub> (5 mol%, 0.005 mmol) were used with TFA: TF<sub>3</sub>AA= 0.9 ml: 0.1 ml as solvent. The reaction mixture was stirred at 60 °C. in the sealed tube for 5 h. After completion of the reaction, the residue was purified by silica gel column chromatography (n-hexane: acetone= 10: 1). Finally, compound ( **3p** ) (23 mg) was isolated in 95% yield. <sup>1</sup>H-NMR (400 MHz, CD<sub>3</sub>OD) δ (ppm) 7.15 – 7.26 (m, 5H), 7.05 (t, *J* = 7.60 Hz, 1H), 6.98 (d, *J* = 7.32 Hz, 1H), 6.66 (d, *J* = 8.16 Hz, 1H), 6.61 (t, *J* = 7.36 Hz, 1H), 3.91 (q, *J* = 7.08 Hz, 2H), 1.19 (t, *J* = 7.12 Hz, 3H); <sup>13</sup>C-NMR (100 MHz, CD<sub>3</sub>OD) δ (ppm) 172.0, 155.8, 143.5, 131.7, 129.9, 129.7, 129.0, 128.3, 124.7, 119.7, 116.8, 46.0, 13.2; LRMS (ESI) calcd for C<sub>15</sub>H<sub>15</sub>NO<sub>2</sub>[M+H]<sup>+</sup>: 242.11, found 242.37.

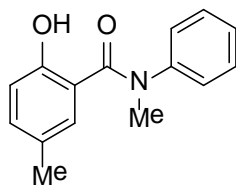

### 2-Hydroxy-N,5-dimethyl-N-phenylbenzamide ( **3q** )

Following the general procedure **I**, *N*,3-dimethyl-*N*-phenylbenzamide (23 mg, 0.1 mmol),  $K_2S_2O_8$  (81 mg, 0.3 mmol) and  $[RuCl_2(p\text{-cymene})]_2$  (5 mol%, 0.005 mmol) were used with TFA: TFAA= 0.9 ml: 0.1 ml as solvent. The reaction mixture was stirred at 60 °C. in the sealed tube for 5.5 h. After completion of the reaction, the residue was purified by silica gel column chromatography (n-hexane: acetone= 10: 1). Finally, compound ( **3q** ) (18 mg) was isolated in 74% yield.  $^1H$ -NMR (400 MHz,  $CD_3OD$ )  $\delta$  (ppm) 7.15 - 7.27 (m, 5H), 6.89 (d,  $J$ = 8.20 Hz, 1H), 6.82 (s, 1H), 6.57 (d,  $J$  = 8.28 Hz, 1H), 3.41 (s, 3H), 2.08 (s, 3H);  $^{13}C$ -NMR (100 MHz,  $CD_3OD$ )  $\delta$  (ppm) 172.5, 153.5, 145.3, 132.4, 129.9, 129.9, 129.1, 128.1, 127.9, 124.1, 116.7, 38.4, 20.2; LRMS (ESI) calcd for  $C_{15}H_{15}NO_2[M+H]^+$ : 242.11, found 242.37.

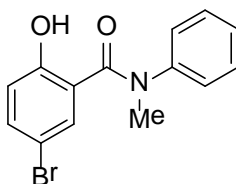

### 5-Bromo-2-hydroxy-N-methyl-N-phenylbenzamide ( **3r** )

Following the general procedure **I**, 3-bromo-*N*-methyl-*N*-phenylbenzamide (29 mg, 0.1 mmol),  $K_2S_2O_8$  (81 mg, 0.3 mmol) and  $[RuCl_2(p\text{-cymene})]_2$  (5 mol%, 0.005 mmol) were used with TFA: TFAA= 0.9 ml: 0.1 ml as solvent. The reaction mixture was stirred at 60 °C. in the sealed tube for 6 h. After completion of the reaction, the residue was purified by silica gel column chromatography (n-hexane: acetone= 10: 1). Finally, compound ( **3r** ) (21 mg) was isolated in 72% yield.  $^1H$ -NMR (400 MHz,  $CDCl_3$ )  $\delta$  (ppm) 10.96 (s, 1H), 7.30 - 7.40 (m, 3H), 7.23 (dd,  $J$  = 8.80 Hz,  $J$  = 2.28 Hz, 1H), 7.12 (d,  $J$  = 7.60 Hz, 2H), 6.81 (d,  $J$  = 8.84 Hz, 1H), 6.71 (d,  $J$  = 1.60 Hz, 1H), 3.49 (s, 3H);  $^{13}C$ -NMR (100 MHz,  $CDCl_3$ )  $\delta$  (ppm) 170.1, 159.9, 159.6, 144.6, 135.6, 133.1, 130.1, 127.9, 126.7, 119.8, 119.7, 117.5, 109.4, 39.4; LRMS (ESI) calcd for  $C_{14}H_{12}BrNO_2[M+H]^+$ : 306.01, found 306.29.

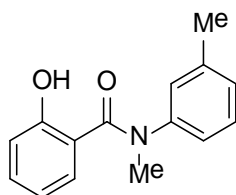

### 2-Hydroxy-N-methyl-N-(m-tolyl)benzamide ( **3s** )

Following the general procedure **I**, *N*-methyl-*N*-(m-tolyl)benzamide (23 mg, 0.1 mmol),  $K_2S_2O_8$  (81 mg, 0.3 mmol) and  $[RuCl_2(p\text{-cymene})]_2$  (5 mol%, 0.005 mmol) were used with TFA: TFAA= 0.9 ml: 0.1 ml as solvent. The reaction mixture was stirred at 60 °C. in the sealed tube for 10h. After completion of the reaction, the residue was purified by silica gel column chromatography (n-hexane: acetone= 10: 1). Finally, compound ( **3s** ) (13 mg) was isolated in 54% yield.  $^1H$ -NMR (400 MHz,  $CD_3OD$ )  $\delta$  (ppm) 6.98 - 7.13(m, 6H), 6.69 (d,  $J$  = 8.20 Hz, 1H), 6.64 (t,  $J$  = 7.40 Hz, 1H), 3.40 (s, 3H), 2.24 (s, 3H);  $^{13}C$ -NMR (100 MHz,  $CD_3OD$ )  $\delta$  (ppm) 172.4, 156.0, 145.2, 140.2, 131.8, 129.8, 129.7, 128.8, 128.4, 124.8, 124.4, 119.8, 116.8, 38.4, 21.2; LRMS (ESI) calcd for  $C_{15}H_{15}NO_2[M+H]^+$ : 242.11, found 242.42.

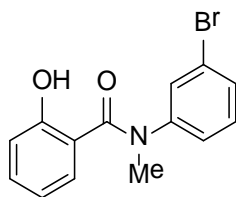

### ***N*-(3-bromophenyl)-2-hydroxy-*N*-methylbenzamide ( 3t )**

Following the general procedure I, *N*-(3-bromophenyl)-*N*-methylbenzamide (29 mg, 0.1 mmol), K<sub>2</sub>S<sub>2</sub>O<sub>8</sub> (81 mg, 0.3 mmol) and [RuCl<sub>2</sub>(*p*-cymene)]<sub>2</sub> (5 mol%, 0.005 mmol) were used with TFA: TFMA = 0.9 ml: 0.1 ml as solvent. The reaction mixture was stirred at 60 °C. in the sealed tube for 6 h. After completion of the reaction, the residue was purified by silica gel column chromatography (n-hexane: acetone = 10: 1). Finally, compound ( 3t ) (28 mg) was isolated in 92% yield. <sup>1</sup>H-NMR (400 MHz, CD<sub>3</sub>OD) δ (ppm) 7.44 (s, 1H), 7.32 (d, *J* = 7.56 Hz, 1H), 7.07 – 7.19 (m, 4H), 6.68 – 6.73 (m, 2H), 3.41 (s, 3H); <sup>13</sup>C-NMR (100 MHz, CD<sub>3</sub>OD) δ (ppm) 172.3, 155.4, 146.6, 132.0, 131.3, 131.1, 129.6, 126.8, 124.6, 122.8, 120.1, 116.7, 38.1; LRMS (ESI) calcd for C<sub>14</sub>H<sub>12</sub>BrNO<sub>2</sub>[M+H]<sup>+</sup>: 306.01, found 306.33.

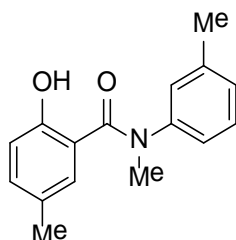

### **2-Hydroxy-*N*,5-dimethyl-*N*-(*m*-tolyl)benzamide ( 3u )**

Following the general procedure I, *N*,3-dimethyl-*N*-(*m*-tolyl)benzamide (24 mg, 0.1 mmol), K<sub>2</sub>S<sub>2</sub>O<sub>8</sub> (81 mg, 0.3 mmol) and [RuCl<sub>2</sub>(*p*-cymene)]<sub>2</sub> (5 mol%, 0.005 mmol) were used with TFA: TFMA = 0.9 ml: 0.1 ml as solvent. The reaction mixture was stirred at 60 °C. in the sealed tube for 7 h. After completion of the reaction, the residue was purified by silica gel column chromatography (n-hexane: acetone = 10: 1). Finally, compound ( 3u ) (16 mg) was isolated in 63% yield. <sup>1</sup>H-NMR (400 MHz, CD<sub>3</sub>OD) δ (ppm) 7.12 (t, *J* = 7.72 Hz, 1H), 7.05 (s, 1H), 6.98 – 7.00 (m, 2H), 6.89 (d, *J* = 8.24 Hz, 1H), 6.81 (s, 1H), 6.59 (d, *J* = 8.28 Hz, 1H), 3.38 (s, 3H), 2.24 (s, 3H), 2.07 (s, 3H); <sup>13</sup>C-NMR (100 MHz, CD<sub>3</sub>OD) δ (ppm) 172.5, 153.7, 145.3, 140.1, 132.4, 129.9, 129.7, 129.0, 128.8, 128.4, 124.8, 124.0, 116.7, 38.4, 21.2, 20.3; LRMS (ESI) calcd for C<sub>16</sub>H<sub>17</sub>NO<sub>2</sub>[M+H]<sup>+</sup>: 256.13, found 256.46.

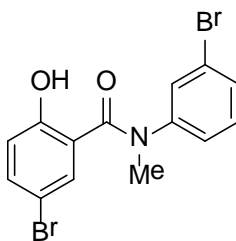

### **5-Bromo-*N*-(3-bromophenyl)-2-hydroxy-*N*-methylbenzamide ( 3v )**

Following the general procedure I, 3-bromo-*N*-(3-bromophenyl)-*N*-methylbenzamide (37 mg, 0.1 mmol), K<sub>2</sub>S<sub>2</sub>O<sub>8</sub> (81 mg, 0.3 mmol) and [RuCl<sub>2</sub>(*p*-cymene)]<sub>2</sub> (5 mol%, 0.005 mmol) were used with TFA: TFMA = 0.9 ml: 0.1 ml as solvent. The reaction mixture was stirred at 60 °C. in the sealed tube for 5 h. After completion of the reaction, the residue was purified by silica gel column chromatography (n-hexane: acetone = 10: 1). Finally, compound ( 3v ) (30 mg) was isolated in 78% yield. <sup>1</sup>H-NMR (400 MHz, CDCl<sub>3</sub>) δ (ppm) 10.68 (s, 1H), 7.46 (d, *J* = 8.08 Hz, 1H), 7.33 (t, *J* = 1.80 Hz, 1H), 7.21 – 7.29 (m, 2H), 7.03 (dd, *J* = 8.00 Hz, *J* = 1.20 Hz, 1H), 6.84 (d, *J* = 8.84 Hz, 1H), 6.77 (d, *J* = 2.36 Hz, 1H), 3.47 (s, 3H); <sup>13</sup>C-NMR (100 MHz, CDCl<sub>3</sub>) δ (ppm) 170.1, 159.7, 145.9, 135.9, 132.9, 131.1, 130.9, 129.7, 125.6, 123.3, 120.0, 117.2, 109.6, 39.4; LRMS (ESI) calcd for C<sub>14</sub>H<sub>11</sub>Br<sub>2</sub>NO<sub>2</sub>[M+H]<sup>+</sup>: 383.92, found

384.24.

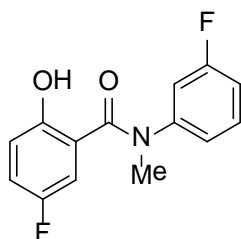

**5-Fluoro-N-(3-fluorophenyl)-2-hydroxy-N-methylbenzamide ( 3w )**

Following the general procedure I, 3-fluoro-N-(3-fluorophenyl)-N-methylbenzamide (25 mg, 0.1 mmol), K<sub>2</sub>S<sub>2</sub>O<sub>8</sub> (81 mg, 0.3 mmol) and [RuCl<sub>2</sub>(*p*-cymene)]<sub>2</sub> (5 mol%, 0.005 mmol) were used with TFA: TFAA= 0.9 ml: 0.1 ml as solvent. The reaction mixture was stirred at 70 °C. in the sealed tube for 1.5 h. After completion of the reaction, the residue was purified by silica gel column chromatography (n-hexane: acetone= 10: 1). Finally, compound ( 3w ) (17 mg) was isolated in 65% yield. <sup>1</sup>H-NMR (400 MHz, CD<sub>3</sub>OD) δ (ppm) 7.23 – 7.29 (m, 1H), 7.04 - 7.08 (m, 2H), 6.93 – 6.97 (m, 1H), 6.84 – 6.89 (m, 2H), 6.63 – 6.67 (m, 1H), 3.41 (s, 3H); <sup>13</sup>C-NMR (100 MHz, CD<sub>3</sub>OD) δ (ppm) 170.6, 163.9 (d, *J*<sub>C-F</sub>= 244 Hz), 156.9 (d, *J*<sub>C-F</sub>= 236 Hz), 151.5, 146.4 (d, *J*<sub>C-F</sub>= 10 Hz), 131.3 (d, *J*<sub>C-F</sub>= 9 Hz), 125.6 (d, *J*<sub>C-F</sub>= 7 Hz), 124.0 (d, *J*<sub>C-F</sub>= 7 Hz), 118.3 (d, *J*<sub>C-F</sub>= 23 Hz), 117.8 (d, *J*<sub>C-F</sub>= 8 Hz), 115.7 (d, *J*<sub>C-F</sub>= 24 Hz), 115.2 (d, *J*<sub>C-F</sub>= 5 Hz), 115.1, 38.0; LRMS (ESI) calcd for C<sub>14</sub>H<sub>11</sub>F<sub>2</sub>NO<sub>2</sub>[M+H]<sup>+</sup>: 264.08, found 264.36.

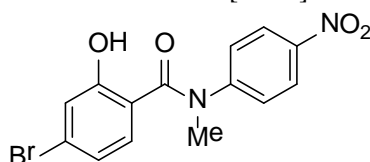

**4-Bromo-2-hydroxy-N-methyl-N-(4-nitrophenyl)benzamide ( 3x )**

Following the general procedure I, 4-bromo-N-methyl-N-(4-nitrophenyl)benzamide (34 mg, 0.1 mmol), K<sub>2</sub>S<sub>2</sub>O<sub>8</sub> (81 mg, 0.3 mmol) and [RuCl<sub>2</sub>(*p*-cymene)]<sub>2</sub> (5 mol%, 0.005 mmol) were used with TFA: TFAA= 0.9 ml: 0.1 ml as solvent. The reaction mixture was stirred at 80 °C. in the sealed tube for 3 h. After completion of the reaction, the residue was purified by silica gel column chromatography (n-hexane: acetone= 10: 1). Finally, compound ( 3x ) (29 mg) was isolated in 82% yield. <sup>1</sup>H-NMR (400 MHz, CD<sub>3</sub>OD) δ (ppm) 8.12 (d, *J* = 9.04 Hz, 2H), 7.43 (d, *J* = 9.04 Hz, 2H), 7.11 (d, *J* = 8.20 Hz, 1H), 6.93 (dd, *J* = 8.20 Hz, *J* = 1.76 Hz, 1H), 6.85 (d, *J* = 1.76 Hz, 1H), 3.47 (s, 3H); <sup>13</sup>C-NMR (100 MHz, CD<sub>3</sub>OD) δ (ppm) 171.0, 156.1, 150.7, 147.2, 131.4, 128.4, 125.6, 125.1, 123.9, 123.5, 119.9, 37.8; LRMS (ESI) calcd for C<sub>14</sub>H<sub>11</sub>BrN<sub>2</sub>O<sub>4</sub>[M+H]<sup>+</sup>: 350.99, found 350.81.

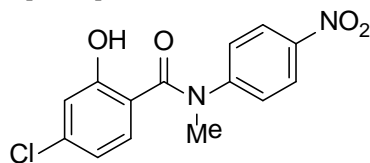

**4-Chloro-2-hydroxy-N-methyl-N-(4-nitrophenyl)benzamide ( 3y )**

Following the general procedure I, 4-chloro-N-methyl-N-(4-nitrophenyl)benzamide (29 mg, 0.1 mmol), K<sub>2</sub>S<sub>2</sub>O<sub>8</sub> (81 mg, 0.3 mmol) and [RuCl<sub>2</sub>(*p*-cymene)]<sub>2</sub> (5 mol%, 0.005 mmol) were used with TFA: TFAA= 0.9 ml: 0.1 ml as solvent. The reaction mixture was stirred at 80 °C. in the sealed tube for 3 h. After completion of the reaction, the residue was purified by silica gel column chromatography (n-hexane: acetone= 10: 1). Finally, compound ( 3y ) (23 mg) was isolated in 75% yield. <sup>1</sup>H-NMR (400 MHz, CDCl<sub>3</sub>) δ (ppm) 10.67 (s, 1H), 8.20 (d, *J* = 8.64 Hz, 2H), 7.26 (d, *J* = 8.64 Hz, 2H), 6.99 (d, *J* = 1.48 Hz, 1H), 6.59 (d, *J* = 8.56 Hz, 1H), 6.46 (dd, *J* = 8.56 Hz, *J* = 1.48 Hz, 1H), 3.53 (s, 3H); <sup>13</sup>C-NMR (100 MHz, CDCl<sub>3</sub>) δ (ppm) 171.4, 161.6, 150.7, 145.9, 139.5, 131.2, 126.9, 125.3, 119.0, 118.7, 114.0, 39.0; LRMS (ESI) calcd for C<sub>14</sub>H<sub>11</sub>ClN<sub>2</sub>O<sub>4</sub>[M+H]<sup>+</sup>: 307.04, found 306.95.

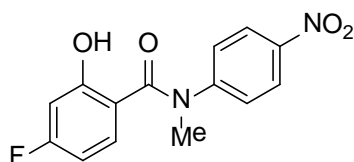

#### 4-Fluoro-2-hydroxy-*N*-methyl-*N*-(4-nitrophenyl)benzamide ( **3z** )

Following the general procedure **I**, 4-fluoro-*N*-methyl-*N*-(4-nitrophenyl)benzamide (28 mg, 0.1 mmol),  $K_2S_2O_8$  (81 mg, 0.3 mmol) and  $[RuCl_2(p\text{-cymene})]_2$  (5 mol%, 0.005 mmol) were used with TFA: TFAC= 0.9 ml: 0.1 ml as solvent. The reaction mixture was stirred at 80 °C. in the sealed tube for 2 h. After completion of the reaction, the residue was purified by silica gel column chromatography (n-hexane: acetone= 10: 1). Finally, compound ( **3z** ) (23 mg) was isolated in 78% yield.  $^1H$ -NMR (400 MHz,  $CDCl_3$ )  $\delta$  (ppm) 10.87 (s, 1H), 8.20 (d,  $J = 8.96$  Hz, 2H), 7.26 (d,  $J = 8.96$  Hz, 2H), 6.64 – 6.68 (m, 2H), 6.17 – 6.22 (m, 1H), 3.53 (s, 3H);  $^{13}C$ -NMR (100 MHz,  $CDCl_3$ )  $\delta$  (ppm) 171.6, 165.6 (d,  $J_{C-F} = 253$  Hz), 163.3 (d,  $J_{C-F} = 14$  Hz), 150.9, 145.8, 132.3 (d,  $J_{C-F} = 11$  Hz), 126.9, 125.3, 111.9 (d,  $J_{C-F} = 3$  Hz), 106.4 (d,  $J_{C-F} = 22$  Hz), 105.4 (d,  $J_{C-F} = 24$  Hz), 39.1; LRMS (ESI) calcd for  $C_{14}H_{11}FN_2O_4[M+H]^+$ : 291.07, found 290.97.

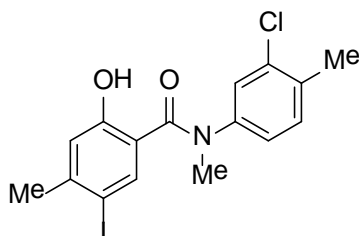

#### *N*-(3-chloro-4-methylphenyl)-2-hydroxy-5-iodo-*N*,4-dimethylbenzamide ( **3a'** )

Following the general procedure **I**, *N*-(3-chloro-4-methylphenyl)-3-iodo-*N*,4-dimethylbenzamide (40 mg, 0.1 mmol),  $K_2S_2O_8$  (81 mg, 0.3 mmol) and  $[RuCl_2(p\text{-cymene})]_2$  (5 mol%, 0.005 mmol) were used with TFA: TFAC= 0.9 ml: 0.1 ml as solvent. The reaction mixture was stirred at 70 °C. in the sealed tube for 3.5 h. After completion of the reaction, the residue was purified by silica gel column chromatography (n-hexane: acetone= 10: 1). Finally, compound ( **3a'** ) (36 mg) was isolated in 87% yield.  $^1H$ -NMR (400 MHz,  $CD_3OD$ )  $\delta$  (ppm) 7.45 (s, 1H), 7.28 (d,  $J = 2.00$  Hz, 1H), 7.16 (d,  $J = 8.04$  Hz, 1H), 7.02 (dd,  $J = 8.04$  Hz,  $J = 2.00$  Hz, 1H), 6.64 (s, 1H), 3.37 (s, 3H), 2.28 (s, 3H), 2.24 (s, 3H);  $^{13}C$ -NMR (100 MHz,  $CD_3OD$ )  $\delta$  (ppm) 170.4, 155.9, 145.3, 143.9, 139.4, 136.3, 135.1, 132.1, 128.4, 126.5, 124.4, 118.2, 87.3, 38.2, 28.1, 19.6; LRMS (ESI) calcd for  $C_{16}H_{15}ClINO_2[M+H]^+$ : 415.98, found 415.82.

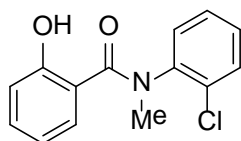

#### *N*-(2-chlorophenyl)-2-hydroxy-*N*-methylbenzamide ( **3b'** )

Following the general procedure **I**, *N*-(2-chlorophenyl)-*N*-methylbenzamide (25 mg, 0.1 mmol),  $K_2S_2O_8$  (81 mg, 0.3 mmol) and  $[RuCl_2(p\text{-cymene})]_2$  (5 mol%, 0.005 mmol) were used with TFA: TFAC= 0.9 ml: 0.1 ml as solvent. The reaction mixture was stirred at 60 °C. in the sealed tube for 6 h. After completion of the reaction, the residue was purified by silica gel column chromatography (n-hexane: acetone= 10: 1). Finally, compound ( **3b'** ) (21 mg) was isolated in 80% yield.  $^1H$ -NMR (400 MHz,  $CDCl_3$ )  $\delta$  (ppm) 10.65 (s, 1H), 7.44 – 7.42 (m, 1H), 7.27 – 7.15 (m, 4H), 6.92 (d,  $J = 8.40$  Hz, 1H), 6.68 (s, 1H), 6.41 (s, 1H), 3.39 (s, 3H);  $^{13}C$ -NMR (100 MHz,  $CDCl_3$ )  $\delta$  (ppm) 172.1, 160.4, 142.6, 133.1, 132.1, 131.0, 129.8, 129.3, 129.1, 128.4, 118.0, 117.9, 116.4, 38.2; LRMS (ESI) calcd for  $C_{14}H_{12}ClNO_2[M+H]^+$ : 262.06, found 261.99.



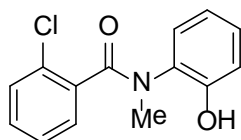

### 2-Chloro-*N*-(2-hydroxyphenyl)-*N*-methylbenzamide ( **3c'** )

Following the general procedure **II**, 2-chloro-*N*-methyl-*N*-phenylbenzamide (25 mg, 0.1 mmol),  $K_2S_2O_8$  (54 mg, 0.2 mmol) and  $Pd(OAc)_2$  (10 mol%, 0.01 mmol) were used with TFA: TFMA= 0.9 ml: 0.1 ml as solvent. The reaction mixture was stirred at 60 °C. in the sealed tube for 2 h. After completion of the reaction, the residue was purified by silica gel column chromatography (n-hexane: acetone= 4: 1). Finally, compound ( **3c'** ) (23 mg) was isolated in 88% yield.  $^1H$ -NMR (400 MHz,  $CD_3OD$ )  $\delta$  (ppm) 7.29 (dd,  $J = 7.60$  Hz,  $J = 1.6$  Hz, 1H), 7.23 (dd,  $J = 8.00$  Hz,  $J = 1.20$  Hz, 1H), 7.18 – 7.11 (m, 2H), 7.06 (dt,  $J = 7.60$  Hz,  $J = 1.20$  Hz, 1H), 7.02 – 6.98 (m, 1H), 6.73 (dd,  $J = 8.00$  Hz,  $J = 1.20$  Hz, 1H), 6.61 (dt,  $J = 7.60$  Hz,  $J = 1.20$  Hz, 1H), 3.35 (s, 3H);  $^{13}C$ -NMR (100 MHz,  $CD_3OD$ )  $\delta$  (ppm) 171.04, 154.09, 137.71, 131.55, 131.39, 131.20, 130.07, 130.02, 129.27, 128.52, 127.22, 120.55, 117.24, 36.28; LRMS (ESI) calcd for  $C_{14}H_{12}ClNO_2[M+H]^+$ : 262.06, found 262.08.

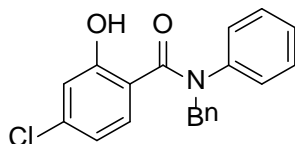

### *N*-benzyl-4-chloro-2-hydroxy-*N*-phenylbenzamide ( **3d'** )

Following the general procedure **I**, *N*-benzyl-4-chloro-*N*-phenylbenzamide (33 mg, 0.1 mmol),  $K_2S_2O_8$  (81 mg, 0.3 mmol) and  $[RuCl_2(p\text{-cymene})]_2$  (5 mol%, 0.005 mmol) were used with TFA: TFMA= 0.9 ml: 0.1 ml as solvent. The reaction mixture was stirred at 60 °C. in the sealed tube for 6 h. After completion of the reaction, the residue was purified by silica gel column chromatography (n-hexane: acetone= 8: 1). Finally, compound ( **3d'** ) (26 mg) was isolated in 77% yield.  $^1H$ -NMR (400 MHz,  $CDCl_3$ )  $\delta$  (ppm) 11.29 (s, 1H), 7.27 – 7.23 (m, 8H), 6.98 (d,  $J = 7.20$  Hz, 2H), 6.94 (d,  $J = 1.20$  Hz, 1H), 6.59 (d,  $J = 8.80$  Hz, 1H), 6.35 (dd,  $J = 8.80$  Hz,  $J = 1.60$  Hz, 1H), 5.10 (s, 2H);  $^{13}C$ -NMR (100 MHz,  $CDCl_3$ )  $\delta$  (ppm) 170.70, 162.06, 143.51, 138.51, 136.68, 131.36, 129.85, 128.68, 128.58, 127.79, 127.71, 127.45, 118.34, 118.19, 114.59, 54.91; LRMS (ESI) calcd for  $C_{20}H_{16}ClNO_2[M+H]^+$ : 338.09, found 337.94.

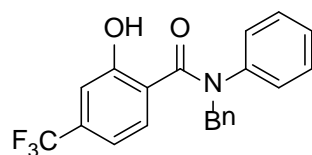

### *N*-benzyl-2-hydroxy-*N*-phenyl-4-(trifluoromethyl)benzamide ( **3e'** )

Following the general procedure **I**, *N*-benzyl-*N*-phenyl-4-(trifluoromethyl)benzamide (36 mg, 0.1 mmol),  $K_2S_2O_8$  (81 mg, 0.3 mmol) and  $[RuCl_2(p\text{-cymene})]_2$  (5 mol%, 0.005 mmol) were used with TFA: TFMA= 0.9 ml: 0.1 ml as solvent. The reaction mixture was stirred at 60 °C. in the sealed tube for 8 h. After completion of the reaction, the residue was purified by silica gel column chromatography (n-hexane: acetone= 8: 1). Finally, compound ( **3e'** ) (25 mg) was isolated in 67% yield.  $^1H$ -NMR (400 MHz,  $CDCl_3$ )  $\delta$  (ppm) 11.07 (s, 1H), 7.28 – 7.25 (m, 8H), 7.19 (s, 1H), 6.98 (d,  $J = 6.40$  Hz, 2H), 6.78 (d,  $J = 8.32$  Hz, 1H), 6.61 (d,  $J = 8.36$  Hz, 1H), 5.13 (s, 2H);  $^{13}C$ -NMR (100 MHz,  $CDCl_3$ )  $\delta$  (ppm) 170.16, 161.00, 143.14, 136.47, 134.22 (q,  $J_{C-F} = 32$  Hz), 130.91, 129.92, 128.74, 128.64, 127.96, 127.91, 127.48, 123.33 (q,  $J_{C-F} = 271$  Hz), 119.20, 115.33 (q,  $J_{C-F} = 4$  Hz), 114.27 (q,  $J_{C-F} = 4$  Hz), 54.96; LRMS (ESI) calcd for  $C_{21}H_{16}F_3NO_2[M+H]^+$ : 372.11, found 372.01.

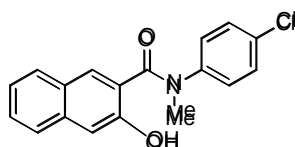

#### ***N*-(4-chlorophenyl)-3-hydroxy-*N*-methyl-2-naphthamide ( **3f'** )**

Following the general procedure **I**, *N*-(4-chlorophenyl)-*N*-methyl-2-naphthamide (30 mg, 0.1 mmol), K<sub>2</sub>S<sub>2</sub>O<sub>8</sub> (81 mg, 0.3 mmol) and [RuCl<sub>2</sub>(*p*-cymene)]<sub>2</sub> (5 mol%, 0.005 mmol) were used with TFA: TFAA= 0.9 ml: 0.1 ml as solvent. The reaction mixture was stirred at 60 °C. in the sealed tube for 2 h. After completion of the reaction, the residue was purified by silica gel column chromatography (n-hexane: acetone= 10: 1). Finally, compound ( **3f'** ) (25 mg) was isolated in 81% yield. <sup>1</sup>H-NMR (400 MHz, CD<sub>3</sub>OD) δ (ppm) 7.62 – 7.66 (m, 2H), 7.54 (d, *J* = 8.00 Hz, 1H), 7.34 (t, *J* = 6.00 Hz, 1H), 7.16 – 7.25 (m, 5H), 7.01 (s, 1H), 3.44 (s, 3H); <sup>13</sup>C-NMR (100 MHz, CD<sub>3</sub>OD) δ (ppm) 171.8, 152.7, 143.7, 136.5, 133.7, 129.9, 129.5, 129.5, 129.0, 128.8, 128.1, 127.9, 127.0, 124.6, 110.5, 38.1; LRMS (ESI) calcd for C<sub>18</sub>H<sub>14</sub>ClNO<sub>2</sub>[M+H]<sup>+</sup>: 312.07, found 312.38.

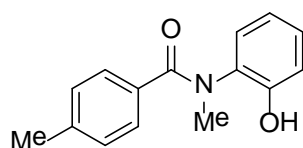

#### ***N*-(2-hydroxyphenyl)-*N*,4-dimethylbenzamide ( **4a** )**

Following the general procedure **II**, *N*,4-dimethyl-*N*-phenylbenzamide (23 mg, 0.1 mmol), K<sub>2</sub>S<sub>2</sub>O<sub>8</sub> (54 mg, 0.2 mmol) and Pd(OAc)<sub>2</sub> (10 mol%, 0.01 mmol) were used with TFA: TFAA= 0.9 ml: 0.1 ml as solvent. The reaction mixture was stirred at 60 °C. in the sealed tube for 0.5 h. After completion of the reaction, the residue was purified by silica gel column chromatography (n-hexane: acetone= 4: 1). Finally, compound ( **4a** ) (17 mg) was isolated in 71% yield. <sup>1</sup>H-NMR (400 MHz, CD<sub>3</sub>OD) δ (ppm) 7.20 (d, *J* = 7.80 Hz, 2H), 7.02 (t, *J* = 7.68 Hz, 1H), 6.96 (d, *J* = 7.76 Hz, 2H), 6.90 (d, *J* = 7.68 Hz, 1H), 6.76 (d, *J* = 8.08 Hz, 1H), 6.64 (t, *J* = 7.52 Hz, 1H), 3.30 (s, 3H), 2.22 (s, 3H); <sup>13</sup>C-NMR (100 MHz, CD<sub>3</sub>OD) δ (ppm) 174.2, 154.0, 141.1, 134.6, 133.1, 130.4, 130.0, 129.2, 128.9, 120.8, 117.4, 37.3, 21.3; LRMS (ESI) calcd for C<sub>15</sub>H<sub>15</sub>NO<sub>2</sub>[M+H]<sup>+</sup>: 242.11, found 242.42.

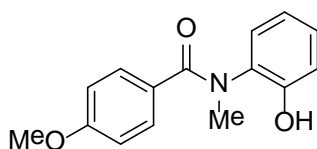

#### ***N*-(2-hydroxyphenyl)-4-methoxy-*N*-methylbenzamide ( **4b** )**

Following the general procedure **II**, 4-methoxy-*N*-methyl-*N*-phenylbenzamide (25 mg, 0.1 mmol), K<sub>2</sub>S<sub>2</sub>O<sub>8</sub> (54 mg, 0.2 mmol) and Pd(OAc)<sub>2</sub> (10 mol%, 0.01 mmol) were used with TFA: TFAA= 0.9 ml: 0.1 ml as solvent. The reaction mixture was stirred at 60 °C. in the sealed tube for 3 h. After completion of the reaction, the residue was purified by silica gel column chromatography (n-hexane: acetone= 4: 1). Finally, compound ( **4b** ) (22 mg) was isolated in 86% yield. <sup>1</sup>H-NMR (400 MHz, CD<sub>3</sub>OD) δ (ppm) 7.28 (d, *J* = 8.44 Hz, 2H), 7.04 (t, *J* = 7.68 Hz, 1H), 6.91 (d, *J* = 7.64 Hz, 1H), 6.78 (d, *J* = 8.08 Hz, 1H), 6.66– 6.69 (m, 3H), 3.71 (s, 3H), 3.31 (s, 3H); <sup>13</sup>C-NMR (100 MHz, CD<sub>3</sub>OD) δ (ppm) 173.9, 162.3, 153.9, 133.4, 130.9, 130.3, 130.0, 129.4, 120.9, 117.5, 113.8, 55.7, 37.4; LRMS (ESI) calcd for C<sub>15</sub>H<sub>15</sub>NO<sub>3</sub>[M+H]<sup>+</sup>: 258.11, found 258.41.

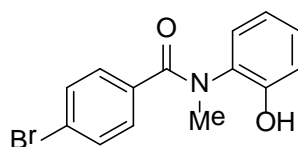

#### **4-Bromo-*N*-(2-hydroxyphenyl)-*N*-methylbenzamide ( **4c** )**

Following the general procedure **II**, 4-bromo-*N*-methyl-*N*-phenylbenzamide (29 mg, 0.1 mmol), K<sub>2</sub>S<sub>2</sub>O<sub>8</sub> (54 mg, 0.2 mmol) and Pd(OAc)<sub>2</sub> (10 mol%, 0.01 mmol) were used with TFA: TFAA= 0.9 ml: 0.1 ml as solvent. The reaction mixture was stirred at 60 °C. in the sealed tube for 20 min. After completion of the reaction, the residue was purified by silica gel column chromatography (n-hexane: acetone= 4: 1). Finally, compound (**4c**) (23 mg) was isolated in 75% yield. <sup>1</sup>H-NMR (400 MHz, CD<sub>3</sub>OD) δ (ppm) 7.32 (d, *J* = 8.36 Hz, 2H), 7.23 (t, *J* = 8.32 Hz, 2H), 7.05 (t, *J* = 7.92 Hz, 1H), 6.98 (d, *J* = 7.76 Hz, 1H), 6.77 (d, *J* = 8.12 Hz, 1H), 6.70 (t, *J* = 7.64 Hz, 1H), 3.33 (s, 3H); <sup>13</sup>C-NMR (100 MHz, CD<sub>3</sub>OD) δ (ppm) 173.0, 153.9, 136.7, 132.6, 131.8, 130.6, 130.3, 130.3, 124.8, 121.0, 117.5, 37.2; LRMS (ESI) calcd for C<sub>14</sub>H<sub>12</sub>BrNO<sub>2</sub>[M+H]<sup>+</sup>: 306.01, found 306.33.

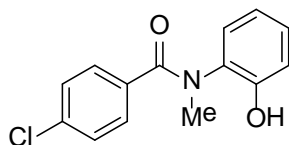

#### 4-Chloro-*N*-(2-hydroxyphenyl)-*N*-methylbenzamide (**4d**)

Following the general procedure **II**, 4-chloro-*N*-methyl-*N*-phenylbenzamide (25 mg, 0.1 mmol), K<sub>2</sub>S<sub>2</sub>O<sub>8</sub> (54 mg, 0.2 mmol) and Pd(OAc)<sub>2</sub> (10 mol%, 0.01 mmol) were used with TFA: TFAA= 0.9 ml: 0.1 ml as solvent. The reaction mixture was stirred at 60 °C. in the sealed tube for 45 min. After completion of the reaction, the residue was purified by silica gel column chromatography (n-hexane: acetone= 4: 1). Finally, compound (**4d**) (20 mg) was isolated in 77% yield. <sup>1</sup>H-NMR (400 MHz, CD<sub>3</sub>OD) δ (ppm) 7.30 (d, *J* = 8.36 Hz, 2H), 7.16 (d, *J* = 8.36 Hz, 2H), 7.05 (t, *J* = 7.72 Hz, 1H), 6.98 (d, *J* = 7.68 Hz, 1H), 6.77 (d, *J* = 8.08 Hz, 1H), 6.70 (t, *J* = 7.60 Hz, 1H), 3.30 (s, 3H); <sup>13</sup>C-NMR (100 MHz, CD<sub>3</sub>OD) δ (ppm) 172.9, 153.9, 136.6, 136.2, 132.6, 130.5, 130.3, 130.3, 128.7, 121.0, 117.5, 37.2; LRMS (ESI) calcd for C<sub>14</sub>H<sub>12</sub>ClNO<sub>2</sub>[M+H]<sup>+</sup>: 262.06, found 262.36.

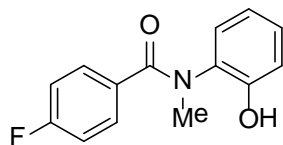

#### 4-Fluoro-*N*-(2-hydroxyphenyl)-*N*-methylbenzamide (**4e**)

Following the general procedure **II**, 4-fluoro-*N*-methyl-*N*-phenylbenzamide (23 mg, 0.1 mmol), K<sub>2</sub>S<sub>2</sub>O<sub>8</sub> (54 mg, 0.2 mmol) and Pd(OAc)<sub>2</sub> (10 mol%, 0.01 mmol) were used with TFA: TFAA= 0.9 ml: 0.1 ml as solvent. The reaction mixture was stirred at 60 °C. in the sealed tube for 45 min. After completion of the reaction, the residue was purified by silica gel column chromatography (n-hexane: acetone= 4: 1). Finally, compound (**4e**) (23 mg) was isolated in 94% yield. <sup>1</sup>H-NMR (400 MHz, CD<sub>3</sub>OD) δ (ppm) 7.36 (dd, *J* = 8.64 Hz, *J* = 5.48 Hz, 2H), 7.02 – 7.07 (m, 1H), 6.97 (dd, *J* = 7.80 Hz, *J* = 1.36 Hz, 1H), 6.86 – 6.91 (m, 2H), 6.77 (d, *J* = 8.16 Hz, 1H), 6.69 (t, *J* = 7.44 Hz, 1H), 3.33 (s, 3H); <sup>13</sup>C-NMR (100 MHz, CD<sub>3</sub>OD) δ (ppm) 173.0, 164.6 (d, *J*<sub>C-F</sub> = 247 Hz), 153.9, 133.8, 133.8, 132.9, 131.3 (d, *J*<sub>C-F</sub> = 9 Hz), 130.2 (d, *J*<sub>C-F</sub> = 5 Hz), 120.9, 117.5, 115.4 (d, *J*<sub>C-F</sub> = 22 Hz), 37.3; LRMS (ESI) calcd for C<sub>14</sub>H<sub>12</sub>FNO<sub>2</sub>[M+H]<sup>+</sup>: 246.09, found 246.32.

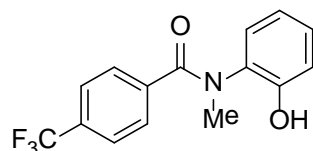

#### *N*-(2-hydroxyphenyl)-*N*-methyl-4-(trifluoromethyl)benzamide (**4f**)

Following the general procedure **II**, *N*-methyl-*N*-phenyl-4-(trifluoromethyl)benzamide (28 mg, 0.1 mmol), K<sub>2</sub>S<sub>2</sub>O<sub>8</sub> (54 mg, 0.2 mmol) and Pd(OAc)<sub>2</sub> (10 mol%, 0.01 mmol) were used with TFA: TFAA= 0.9 ml: 0.1 ml as solvent. The reaction mixture was stirred at 70 °C. in the sealed tube for 0.5 h. After completion of the reaction, the residue was purified by silica gel column chromatography (n-hexane: acetone= 4: 1). Finally, compound (**4f**) (22 mg) was

isolated in 75% yield. <sup>1</sup>H-NMR (400 MHz, CD<sub>3</sub>OD) δ (ppm) 7.45 – 7.51 (m, 4H), 7.02 – 7.07 (m, 2H), 6.75 (d, *J* = 8.04 Hz, 1H), 6.70 (t, *J* = 7.52 Hz, 1H), 3.36 (s, 3H); <sup>13</sup>C-NMR (100 MHz, CD<sub>3</sub>OD) δ (ppm) 172.5, 153.9, 141.6, 132.3, 132.2 (q, *J*<sub>C-F</sub> = 33 Hz), 130.5, 130.3, 129.3, 125.5 (q, *J*<sub>C-F</sub> = 4 Hz), 125.2 (q, *J*<sub>C-F</sub> = 270 Hz), 121.0, 117.5, 37.2; LRMS (ESI) calcd for C<sub>15</sub>H<sub>12</sub>F<sub>3</sub>NO<sub>2</sub>[M+H]<sup>+</sup>: 296.08, found 296.34.

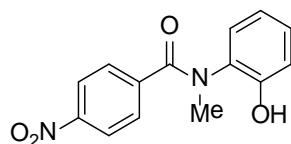

#### ***N*-(2-hydroxyphenyl)-*N*-methyl-4-nitrobenzamide ( 4g )**

Following the general procedure **II**, *N*-methyl-4-nitro-*N*-phenylbenzamide (26 mg, 0.1mmol), K<sub>2</sub>S<sub>2</sub>O<sub>8</sub> (54 mg, 0.2 mmol) and Pd(OAc)<sub>2</sub> (10 mol%, 0.01 mmol) were used with TFA: TFSA = 0.9 ml: 0.1 ml as solvent. The reaction mixture was stirred at 60 °C. in the sealed tube for 2.5 h. After completion of the reaction, the residue was purified by silica gel column chromatography (n-hexane: acetone = 4: 1). Finally, compound ( **4g** ) (20 mg) was isolated in 74% yield. <sup>1</sup>H-NMR (400 MHz, CD<sub>3</sub>OD) δ (ppm) 8.03 (d, *J* = 8.84 Hz, 2H), 7.54 (d, *J* = 8.84 Hz, 2H), 7.02 – 7.07 (m, 2H), 6.70 – 6.75 (m, 2H), 3.36 (s, 3H); <sup>13</sup>C-NMR (100 MHz, CD<sub>3</sub>OD) δ (ppm) 171.9, 154.0, 149.5, 144.0, 132.0, 130.7, 130.3, 129.8, 123.7, 121.1, 117.5, 37.1; LRMS (ESI) calcd for C<sub>14</sub>H<sub>12</sub>N<sub>2</sub>O<sub>4</sub>[M+H]<sup>+</sup>: 273.08, found 273.33.

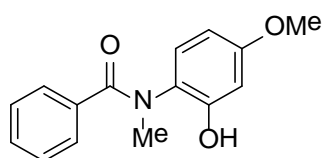

#### ***N*-(2-hydroxy-4-methoxyphenyl)-*N*-methylbenzamide ( 4h )**

Following the general procedure **II**, *N*-(4-methoxyphenyl)-*N*-methylbenzamide (24 mg, 0.1 mmol), K<sub>2</sub>S<sub>2</sub>O<sub>8</sub> (54 mg, 0.2 mmol) and Pd(OAc)<sub>2</sub> (10 mol%, 0.01 mmol) were used with TFA: TFSA = 0.9 ml: 0.1 ml as solvent. The reaction mixture was stirred at 50 °C. in the sealed tube for 2 h. After completion of the reaction, the residue was purified by silica gel column chromatography (n-hexane: acetone = 4: 1). Finally, compound ( **4h** ) (24 mg) was isolated in 93% yield. <sup>1</sup>H-NMR (400 MHz, CD<sub>3</sub>OD) δ (ppm) 7.34 (d, *J* = 7.76 Hz, 2H), 7.25 (t, *J* = 7.16 Hz, 1H), 7.18 (t, *J* = 7.68 Hz, 2H), 6.84 (d, *J* = 8.64 Hz, 1H), 6.34 (d, *J* = 2.60 Hz, 1H), 6.24 (dd, *J* = 8.64 Hz, *J* = 2.60 Hz, 1H), 3.67 (s, 3H), 3.32 (s, 3H); <sup>13</sup>C-NMR (100 MHz, CD<sub>3</sub>OD) δ (ppm) 174.4, 161.6, 154.8, 137.7, 130.8, 130.6, 128.7, 128.6, 126.2, 106.1, 102.9, 55.7, 37.4; LRMS (ESI) calcd for C<sub>15</sub>H<sub>15</sub>NO<sub>3</sub>[M+H]<sup>+</sup>: 258.11, found 258.41.

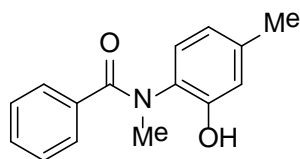

#### ***N*-(2-hydroxy-4-methylphenyl)-*N*-methylbenzamide ( 4i )**

Following the general procedure **II**, *N*-methyl-*N*-(*p*-tolyl)benzamide (23 mg, 0.1 mmol), K<sub>2</sub>S<sub>2</sub>O<sub>8</sub> (54 mg, 0.2 mmol) and Pd(OAc)<sub>2</sub> (10 mol%, 0.01 mmol) were used with TFA: TFSA = 0.9 ml: 0.1 ml as solvent. The reaction mixture was stirred at 50 °C. in the sealed tube for 40 min. After completion of the reaction, the residue was purified by silica gel column chromatography (n-hexane: acetone = 4: 1). Finally, compound ( **4i** ) (18.6 mg) was isolated in 77% yield. <sup>1</sup>H-NMR (400 MHz, CD<sub>3</sub>OD) δ (ppm) 7.32 (d, *J* = 7.48 Hz, 2H), 7.22 (t, *J* = 7.32 Hz, 1H), 7.15 (t, *J* = 7.52 Hz, 2H), 6.78 (d, *J* = 7.92 Hz, 1H), 6.59 (s, 1H), 6.46 (d, *J* = 7.92 Hz, 1H), 3.31 (s, 3H), 2.16 (s, 3H); <sup>13</sup>C-NMR (100 MHz, CD<sub>3</sub>OD) δ (ppm) 174.2, 153.6, 140.5, 137.7, 130.6, 130.3, 130.0, 128.7, 128.6, 121.5, 117.9, 37.3, 21.2; LRMS (ESI) calcd for C<sub>15</sub>H<sub>15</sub>NO<sub>2</sub>[M+H]<sup>+</sup>: 242.11, found 242.37.

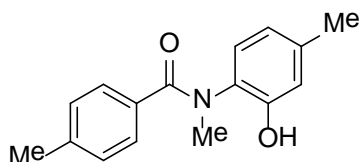

***N*-(2-hydroxy-4-methylphenyl)-*N*,4-dimethylbenzamide ( **4j** )**

Following the general procedure **II**, *N*,4-dimethyl-*N*-(*p*-tolyl)benzamide (24 mg, 0.1 mmol), K<sub>2</sub>S<sub>2</sub>O<sub>8</sub> (54 mg, 0.2 mmol) and Pd(OAc)<sub>2</sub> (10 mol%, 0.01 mmol) were used with TFA: TFAA= 0.9 ml: 0.1 ml as solvent. The reaction mixture was stirred at 45 °C. in the sealed tube for 1 h. After completion of the reaction, the residue was purified by silica gel column chromatography (n-hexane: acetone= 4: 1). Finally, compound ( **4j** ) (20 mg) was isolated in 78% yield. <sup>1</sup>H-NMR (400 MHz, CD<sub>3</sub>OD) δ (ppm) 7.21 (d, *J* = 7.92 Hz, 2H), 6.96 (d, *J* = 7.92 Hz, 2H), 6.76 (d, *J* = 7.92 Hz, 1H), 6.59 (s, 1H), 6.47 (d, *J* = 7.92 Hz, 1H), 3.29 (s, 3H), 2.23 (s, 3H), 2.17 (s, 3H); <sup>13</sup>C-NMR (100 MHz, CD<sub>3</sub>OD) δ (ppm) 174.3, 153.5, 141.0, 140.4, 134.6, 130.5, 129.9, 129.1, 128.9, 121.5, 117.9, 37.3, 21.3, 21.1; LRMS (ESI) calcd for C<sub>16</sub>H<sub>17</sub>NO<sub>2</sub>[M+H]<sup>+</sup>: 256.13, found 256.36.

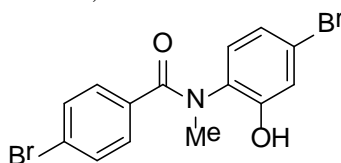

**4-Bromo-*N*-(4-bromo-2-hydroxyphenyl)-*N*-methylbenzamide ( **4k** )**

Following the general procedure **II**, 4-bromo-*N*-(4-bromophenyl)-*N*-methylbenzamide (37 mg, 0.1 mmol), K<sub>2</sub>S<sub>2</sub>O<sub>8</sub> (54 mg, 0.2 mmol) and Pd(OAc)<sub>2</sub> (10 mol%, 0.01 mmol) were used with TFA: TFAA= 0.9 ml: 0.1 ml as solvent. The reaction mixture was stirred at 60 °C. in the sealed tube for 1 h. After completion of the reaction, the residue was purified by silica gel column chromatography (n-hexane: acetone= 4: 1). Finally, compound ( **4k** ) (27 mg) was isolated in 70% yield. <sup>1</sup>H-NMR (400 MHz, CD<sub>3</sub>OD) δ (ppm) 7.37 (d, *J* = 8.28 Hz, 2H), 7.23 (d, *J* = 8.32 Hz, 2H), 6.93 – 6.95 (m, 2H), 6.86 (d, *J* = 8.36 Hz, 1H), 3.30 (s, 3H); <sup>13</sup>C-NMR (100 MHz, CD<sub>3</sub>OD) δ (ppm) 172.8, 154.9, 136.4, 132.1, 131.9, 131.7, 130.6, 125.0, 124.0, 122.9, 120.5, 37.1; LRMS (ESI) calcd for C<sub>14</sub>H<sub>11</sub>Br<sub>2</sub>NO<sub>2</sub>[M+H]<sup>+</sup>: 383.92, found 384.19.

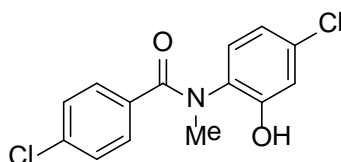

**4-Chloro-*N*-(4-chloro-2-hydroxyphenyl)-*N*-methylbenzamide ( **4l** )**

Following the general procedure **II**, 4-chloro-*N*-(4-chlorophenyl)-*N*-methylbenzamide (28 mg, 0.1 mmol), K<sub>2</sub>S<sub>2</sub>O<sub>8</sub> (54 mg, 0.2 mmol) and Pd(OAc)<sub>2</sub> (10 mol%, 0.01 mmol) were used with TFA: TFAA= 0.9 ml: 0.1 ml as solvent. The reaction mixture was stirred at 80 °C. in the sealed tube for 1 h. After completion of the reaction, the residue was purified by silica gel column chromatography (n-hexane: acetone= 4: 1). Finally, compound ( **4l** ) (19 mg) was isolated in 65% yield. <sup>1</sup>H-NMR (400 MHz, CD<sub>3</sub>OD) δ (ppm) 7.30 (d, *J* = 8.00 Hz, 2H), 7.21 (d, *J* = 8.00 Hz, 2H), 7.00 (d, *J* = 8.00 Hz, 1H), 6.78 (s, 1H), 6.72 (d, *J* = 8.00 Hz, 1H), 3.31 (s, 3H); <sup>13</sup>C-NMR (100 MHz, CD<sub>3</sub>OD) δ (ppm) 172.8, 154.7, 136.8, 136.0, 135.2, 131.7, 131.4, 130.4, 128.9, 120.9, 117.5, 37.2; LRMS (ESI) calcd for C<sub>14</sub>H<sub>11</sub>Cl<sub>2</sub>NO<sub>2</sub>[M+H]<sup>+</sup>: 296.02, found 296.34.

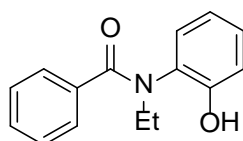

***N*-ethyl-*N*-(2-hydroxyphenyl)benzamide ( **4m** )**

Following the general procedure **II**, *N*-ethyl-*N*-phenylbenzamide (23 mg, 0.1 mmol), K<sub>2</sub>S<sub>2</sub>O<sub>8</sub> (54 mg, 0.2 mmol) and Pd(OAc)<sub>2</sub> (10 mol%, 0.01 mmol) were used with TFA: TFAA= 0.9 ml: 0.1 ml as solvent. The reaction mixture was stirred at 60 °C. in the sealed tube for 1h. After completion of the reaction, the residue was purified by silica gel column chromatography (n-hexane: acetone= 4: 1). Finally, compound ( **4m** ) (16 mg) was isolated in 66% yield. <sup>1</sup>H-NMR (400 MHz, CD<sub>3</sub>OD) δ (ppm) 7.32 (d, *J* = 8.00 Hz, 2H), 7.21 (t, *J* = 8.00 Hz, 1H), 7.14 (t, *J* = 8.00 Hz, 2H), 7.02 (t, *J* = 8.00 Hz, 1H), 6.91 (d, *J* = 8.00 Hz, 1H), 6.75 (d, *J* = 8.00 Hz, 1H), 6.66 (t, *J* = 8.00 Hz, 1H), 4.00 – 4.09 (m, 1H), 3.62 – 3.71(m, 1H), 1.19 (t, *J* = 6.00 Hz, 3H); <sup>13</sup>C-NMR (100 MHz, CD<sub>3</sub>OD) δ (ppm) 173.7, 154.3, 138.0, 131.5, 131.0, 130.5, 130.1, 128.7, 128.5, 120.6, 117.4, 44.9, 12.7; LRMS (ESI) calcd for C<sub>15</sub>H<sub>15</sub>NO<sub>2</sub>[M+H]<sup>+</sup>: 242.11, found 242.37.

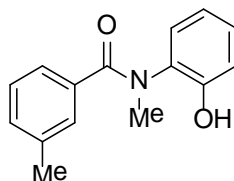

#### ***N*-(2-hydroxyphenyl)-*N*,3-dimethylbenzamide ( **4n** )**

Following the general procedure **II**, *N*,3-dimethyl-*N*-phenylbenzamide (23 mg, 0.1 mmol), K<sub>2</sub>S<sub>2</sub>O<sub>8</sub> (54 mg, 0.2 mmol) and Pd(OAc)<sub>2</sub> (10 mol%, 0.01 mmol) were used with TFA: TFAA= 0.9 ml: 0.1 ml as solvent. The reaction mixture was stirred at 60 °C. in the sealed tube for 0.5 h. After completion of the reaction, the residue was purified by silica gel column chromatography (n-hexane: acetone= 4: 1). Finally, compound ( **4n** ) (11 mg) was isolated in 46% yield. <sup>1</sup>H-NMR (400 MHz, CD<sub>3</sub>OD) δ (ppm) 7.17 (s, 1H), 7.00 – 7.10 (m, 4H), 6.91 (d, *J* = 7.72 Hz, 1H), 6.77 (d, *J* = 8.12 Hz, 1H), 6.64 (t, *J* = 7.56 Hz, 1H), 3.33 (s, 3H), 2.19 (s, 3H); <sup>13</sup>C-NMR (100 MHz, CD<sub>3</sub>OD) δ (ppm) 174.3, 154.0, 138.5, 137.4, 133.0, 131.3, 130.4, 130.1, 129.4, 128.5, 125.9, 120.8, 117.4, 37.2, 21.2; LRMS (ESI) calcd for C<sub>15</sub>H<sub>15</sub>NO<sub>2</sub>[M+H]<sup>+</sup>: 242.11, found 242.47.

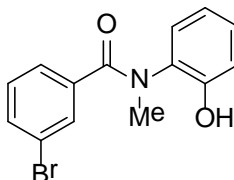

#### **3-Bromo-*N*-(2-hydroxyphenyl)-*N*-methylbenzamide ( **4o** )**

Following the general procedure **II**, 3-bromo-*N*-methyl-*N*-phenylbenzamide (29 mg, 0.1 mmol), K<sub>2</sub>S<sub>2</sub>O<sub>8</sub> (54 mg, 0.2 mmol) and Pd(OAc)<sub>2</sub> (10 mol%, 0.01 mmol) were used with TFA: TFAA= 0.9 ml: 0.1 ml as solvent. The reaction mixture was stirred at 60 °C. in the sealed tube for 45 min. After completion of the reaction, the residue was purified by silica gel column chromatography (n-hexane: acetone= 4: 1). Finally, compound ( **4o** ) (16 mg) was isolated in 82% yield. <sup>1</sup>H-NMR (400 MHz, CD<sub>3</sub>OD) δ (ppm) 7.50 (s, 1H), 7.37 (d, *J* = 8.04 Hz, 1H), 7.26 (d, *J* = 7.72 Hz, 1H), 7.03 – 7.08 (m, 2H), 6.99 (dd, *J* = 7.84 Hz, *J* = 1.36 Hz, 1H), 6.77 (dd, *J* = 8.32 Hz, *J* = 1.00 Hz, 1H), 6.69 (m, 1H), 3.33 (s, 3H); <sup>13</sup>C-NMR (100 MHz, CD<sub>3</sub>OD) δ (ppm) 172.3, 154.0, 139.7, 133.6, 132.5, 131.7, 130.4, 130.4, 130.2, 127.4, 122.4, 121.0, 117.4, 37.2; LRMS (ESI) calcd for C<sub>14</sub>H<sub>12</sub>BrNO<sub>2</sub>[M+H]<sup>+</sup>: 306.01, found 306.29.

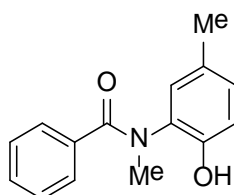

#### ***N*-(2-hydroxy-5-methylphenyl)-*N*-methylbenzamide ( **4p** )**

Following the general procedure **II**, *N*-methyl-*N*-(*m*-tolyl)benzamide (23 mg, 0.1 mmol), K<sub>2</sub>S<sub>2</sub>O<sub>8</sub> (54 mg, 0.2 mmol)

and Pd(OAc)<sub>2</sub> (10 mol%, 0.01 mmol) were used with TFA: TFAA= 0.9 ml: 0.1 ml as solvent. The reaction mixture was stirred at 60 °C. in the sealed tube for 0.5 h. After completion of the reaction, the residue was purified by silica gel column chromatography (n-hexane: acetone= 4: 1). Finally, compound ( **4p** ) (20 mg) was isolated in 83% yield. <sup>1</sup>H-NMR (400 MHz, CD<sub>3</sub>OD) δ (ppm) 7.33 (d, *J* = 7.12 Hz, 2H), 7.23 (t, *J* = 7.32 Hz, 1H), 7.15 (t, *J* = 7.64 Hz, 2H), 6.83 (d, *J* = 8.20 Hz, 1H), 6.75 (s, 1H), 6.64 (d, *J* = 8.24 Hz, 1H), 3.32 (s, 3H), 2.08 (s, 3H); <sup>13</sup>C-NMR (100 MHz, CD<sub>3</sub>OD) δ (ppm) 174.1, 151.5, 137.6, 132.5, 130.6, 130.5, 130.4, 128.8, 128.5, 117.2, 37.3, 20.2; LRMS (ESI) calcd for C<sub>15</sub>H<sub>15</sub>NO<sub>2</sub>[M+H]<sup>+</sup>: 242.11, found 242.66.

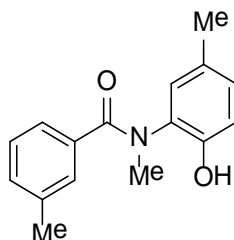

#### ***N*-(2-hydroxy-5-methylphenyl)-*N*,3-dimethylbenzamide ( **4q** )**

Following the general procedure **II**, *N*,3-dimethyl-*N*-(*m*-tolyl)benzamide (24 mg, 0.1 mmol), K<sub>2</sub>S<sub>2</sub>O<sub>8</sub> (54 mg, 0.2 mmol) and Pd(OAc)<sub>2</sub> (10 mol%, 0.01 mmol) were used with TFA: TFAA= 0.9 ml: 0.1 ml as solvent. The reaction mixture was stirred at 50 °C. in the sealed tube for 0.5 h, then 60 °C for 0.5 h After completion of the reaction, the residue was purified by silica gel column chromatography (n-hexane: acetone= 4: 1). Finally, compound ( **4q** ) (16.5 mg) was isolated in 65% yield. <sup>1</sup>H-NMR (400 MHz, CD<sub>3</sub>OD) δ (ppm) 7.18 (s, 1H), 7.10 (d, *J* = 7.04 Hz, 1H), 7.00 – 7.06 (m, 2H), 6.83 (dd, *J* = 8.00 Hz, *J* = 1.28 Hz, 1H), 6.74 (d, *J* = 1.76 Hz, 1H), 6.65 (d, *J* = 8.24 Hz, 1H), 6.65 (t, *J* = 7.52 Hz, 1H), 3.31 (s, 3H), 2.20 (s, 3H), 2.08 (s, 3H); <sup>13</sup>C-NMR (100 MHz, CD<sub>3</sub>OD) δ (ppm) 174.2, 151.6, 138.4, 137.5, 132.6, 131.3, 130.5, 130.5, 130.3, 129.4, 128.4, 125.9, 117.2, 37.3, 21.2, 20.2; LRMS (ESI) calcd for C<sub>16</sub>H<sub>17</sub>NO<sub>2</sub>[M+H]<sup>+</sup>: 256.13, found 256.46.

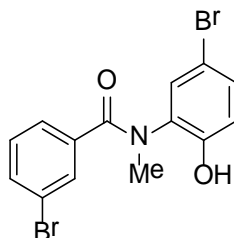

#### **3-Bromo-*N*-(5-bromo-2-hydroxyphenyl)-*N*-methylbenzamide ( **4r** )**

Following the general procedure **II**, 3-bromo-*N*-(3-bromophenyl)-*N*-methylbenzamide (37 mg, 0.1 mmol), K<sub>2</sub>S<sub>2</sub>O<sub>8</sub> (54 mg, 0.2 mmol) and Pd(OAc)<sub>2</sub> (10 mol%, 0.01 mmol) were used with TFA: TFAA= 0.9 ml: 0.1 ml as solvent. The reaction mixture was stirred at 60 °C. in the sealed tube for 4 h. After completion of the reaction, the residue was purified by silica gel column chromatography (n-hexane: acetone= 4: 1). Finally, compound ( **4r** ) (27 mg) was isolated in 70% yield. <sup>1</sup>H-NMR (400 MHz, CD<sub>3</sub>OD) δ (ppm) 7.52 (s, 1H), 7.41 (d, *J* = 7.88 Hz, 1H), 7.24 – 7.28 (m, 2H), 7.18 (d, *J* = 8.64 Hz, 1H), 7.10 (t, *J* = 7.84 Hz, 1H), 6.69 (d, *J* = 8.68 Hz, 1H), 3.31 (s, 3H); <sup>13</sup>C-NMR (100 MHz, CD<sub>3</sub>OD) δ (ppm) 172.1, 153.4, 139.3, 133.9, 133.8, 133.2, 133.0, 131.7, 130.5, 127.4, 122.5, 119.0, 111.6, 37.2; LRMS (ESI) calcd for C<sub>14</sub>H<sub>11</sub>Br<sub>2</sub>NO<sub>2</sub>[M+H]<sup>+</sup>: 383.92, found 384.24.

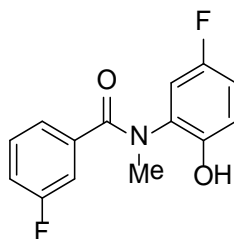

### 3-Fluoro-*N*-(5-fluoro-2-hydroxyphenyl)-*N*-methylbenzamide ( **4s** )

Following the general procedure **II**, 3-fluoro-*N*-(3-fluorophenyl)-*N*-methylbenzamide (25 mg, 0.1 mmol), K<sub>2</sub>S<sub>2</sub>O<sub>8</sub> (54 mg, 0.2 mmol) and Pd(OAc)<sub>2</sub> (10 mol%, 0.01 mmol) were used with TFA: TFAA= 0.9 ml: 0.1 ml as solvent. The reaction mixture was stirred at 70 °C. in the sealed tube for 0.5 h. After completion of the reaction, the residue was purified by silica gel column chromatography (n-hexane: acetone= 4: 1). Finally, compound ( **4s** ) (18 mg) was isolated in 68% yield. <sup>1</sup>H-NMR (400 MHz, CD<sub>3</sub>OD) δ (ppm) 7.18 – 7.23 (m, 1H), 7.14 (d, *J* = 7.48 Hz, 1H), 7.09 (d, *J* = 9.20 Hz, 1H), 7.01 (t, *J* = 8.24 Hz, 1H), 6.81 – 6.88 (m, 2H), 6.72 – 6.75 (m, 1H), 3.32 (s, 3H); <sup>13</sup>C-NMR (100 MHz, CD<sub>3</sub>OD) δ (ppm) 172.4, 163.3 (d, *J*<sub>C-F</sub>= 244 Hz), 157.0 (d, *J*<sub>C-F</sub>= 236 Hz), 150.5 (d, *J*<sub>C-F</sub>= 3 Hz), 139.6 (d, *J*<sub>C-F</sub>= 7 Hz), 132.9, 130.7 (d, *J*<sub>C-F</sub>= 8 Hz), 124.6, 118.0 (d, *J*<sub>C-F</sub>= 9 Hz), 117.6 (d, *J*<sub>C-F</sub>= 22 Hz), 116.8 (d, *J*<sub>C-F</sub>= 24 Hz), 116.7 (d, *J*<sub>C-F</sub>= 23 Hz), 115.6 (d, *J*<sub>C-F</sub>= 24 Hz), 37.0; LRMS (ESI) calcd for C<sub>14</sub>H<sub>11</sub>F<sub>2</sub>NO<sub>2</sub>[M+H]<sup>+</sup>: 264.08, found 264.36.

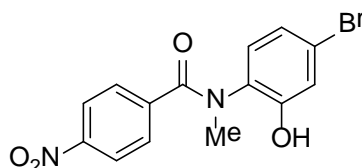

### *N*-(4-bromo-2-hydroxyphenyl)-*N*-methyl-4-nitrobenzamide ( **4t** )

Following the general procedure **II**, *N*-(4-bromophenyl)-*N*-methyl-4-nitrobenzamide (34 mg, 0.1 mmol), K<sub>2</sub>S<sub>2</sub>O<sub>8</sub> (54 mg, 0.2 mmol) and Pd(OAc)<sub>2</sub> (10 mol%, 0.01 mmol) were used with TFA: TFAA= 0.9 ml: 0.1 ml as solvent. The reaction mixture was stirred at 70 °C. in the sealed tube for 3 h. After completion of the reaction, the residue was purified by silica gel column chromatography (n-hexane: acetone= 4: 1). Finally, compound ( **4t** ) (32.5 mg) was isolated in 93% yield. <sup>1</sup>H-NMR (400 MHz, CD<sub>3</sub>OD) δ (ppm) 8.07 (d, *J* = 8.80 Hz, 2H), 7.54 (d, *J* = 8.80 Hz, 2H), 7.03 (d, *J* = 8.40 Hz, 1H), 6.91 (d, *J* = 1.60 Hz, 1H), 6.86 (dd, *J* = 8.40 Hz, *J* = 1.60 Hz, 1H), 3.34 (s, 3H); <sup>13</sup>C-NMR (100 MHz, CD<sub>3</sub>OD) δ (ppm) 171.8, 155.0, 149.6, 143.7, 131.8, 131.6, 129.8, 124.1, 123.9, 123.3, 120.6, 37.0; LRMS (ESI) calcd for C<sub>14</sub>H<sub>11</sub>BrN<sub>2</sub>O<sub>4</sub>[M+H]<sup>+</sup>: 350.99, found 350.81.

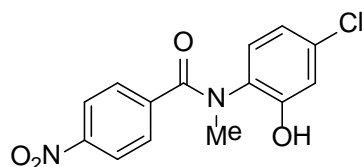

### *N*-(4-chloro-2-hydroxyphenyl)-*N*-methyl-4-nitrobenzamide ( **4u** )

Following the general procedure **II**, *N*-(4-chlorophenyl)-*N*-methyl-4-nitrobenzamide (29 mg, 0.1 mmol), K<sub>2</sub>S<sub>2</sub>O<sub>8</sub> (54 mg, 0.2 mmol) and Pd(OAc)<sub>2</sub> (10 mol%, 0.01 mmol) were used with TFA: TFAA= 0.9 ml: 0.1 ml as solvent. The reaction mixture was stirred at 80 °C. in the sealed tube for 1.5 h. After completion of the reaction, the residue was purified by silica gel column chromatography (n-hexane: acetone= 4: 1). Finally, compound ( **4u** ) (22 mg) was isolated in 72% yield. <sup>1</sup>H-NMR (400 MHz, CD<sub>3</sub>OD) δ (ppm) 8.07 (d, *J* = 8.40 Hz, 2H), 7.54 (d, *J* = 8.40 Hz, 2H), 7.09 (d, *J* = 8.40 Hz, 1H), 6.75 (d, *J* = 2.00 Hz, 1H), 6.71 (dd, *J* = 8.40 Hz, *J* = 2.00 Hz, 1H), 3.34 (s, 3H); <sup>13</sup>C-NMR (100 MHz, CD<sub>3</sub>OD) δ (ppm) 171.8, 154.8, 149.6, 143.7, 135.6, 131.5, 131.1, 129.8, 123.9, 121.1, 117.5, 37.0; LRMS (ESI) calcd for C<sub>14</sub>H<sub>11</sub>ClN<sub>2</sub>O<sub>4</sub>[M+H]<sup>+</sup>: 307.04, found 306.90.

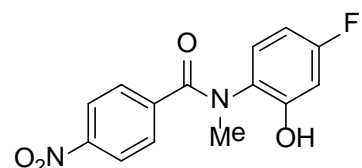



#### ***N*-(4-fluoro-2-hydroxyphenyl)-*N*-methyl-4-nitrobenzamide ( 4v )**

Following the general procedure **II**, *N*-(4-fluorophenyl)-*N*-methyl-4-nitrobenzamide (28 mg, 0.1 mmol), K<sub>2</sub>S<sub>2</sub>O<sub>8</sub> (54 mg, 0.2 mmol) and Pd(OAc)<sub>2</sub> (10 mol%, 0.01 mmol) were used with TFA: TFAA= 0.9 ml: 0.1 ml as solvent. The reaction mixture was stirred at 80 °C. in the sealed tube for 2.5 h. After completion of the reaction, the residue was purified by silica gel column chromatography (n-hexane: acetone= 4: 1). Finally, compound ( **4v** ) (24 mg) was isolated in 83% yield. <sup>1</sup>H-NMR (400 MHz, CD<sub>3</sub>OD) δ (ppm) 8.06 (d, *J* = 8.40 Hz, 2H), 7.54 (d, *J* = 8.80 Hz, 2H), 7.09 – 7.13 (m, 1H), 6.43 – 6.49 (m, 2H), 3.34 (s, 3H); <sup>13</sup>C-NMR (100 MHz, CD<sub>3</sub>OD) δ (ppm) 172.0, 164.1 (d, *J*<sub>C-F</sub>= 245 Hz), 155.4 (d, *J*<sub>C-F</sub>= 12 Hz), 149.5, 143.9, 131.6 (d, *J*<sub>C-F</sub>= 11 Hz), 129.7, 128.6 (d, *J*<sub>C-F</sub>= 3 Hz), 123.8, 107.6 (d, *J*<sub>C-F</sub>= 23 Hz), 104.5 (d, *J*<sub>C-F</sub>= 25 Hz), 37.2; LRMS (ESI) calcd for C<sub>14</sub>H<sub>11</sub>FN<sub>2</sub>O<sub>4</sub>[M+H]<sup>+</sup>: 291.07, found 290.58.

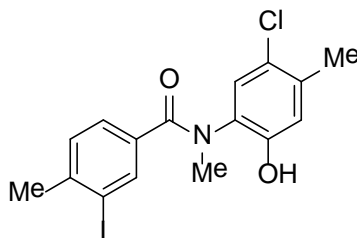

#### ***N*-(5-chloro-2-hydroxy-4-methylphenyl)-3-iodo-*N*,4-dimethylbenzamide ( 4w )**

Following the general procedure **II**, *N*-(3-chloro-4-methylphenyl)-3-iodo-*N*,4-dimethylbenzamide (40 mg, 0.1 mmol), K<sub>2</sub>S<sub>2</sub>O<sub>8</sub> (54 mg, 0.2 mmol) and Pd(OAc)<sub>2</sub> (10 mol%, 0.01 mmol) were used with TFA: TFAA= 0.9 ml: 0.1 ml as solvent. The reaction mixture was stirred at 60 °C. in the sealed tube for 2 h. After completion of the reaction, the residue was purified by silica gel column chromatography (n-hexane: acetone= 4: 1). Finally, compound ( **4w** ) (26 mg) was isolated in 62% yield. <sup>1</sup>H-NMR (400 MHz, CD<sub>3</sub>OD) δ (ppm) 7.81 (d, *J* = 1.08 Hz, 1H), 7.22 (dd, *J* = 7.84 Hz, *J* = 1.08 Hz, 1H), 7.10 (d, *J* = 7.84 Hz, 1H), 7.05 (s, 1H), 6.69 (s, 1H), 3.28 (s, 3H), 2.32 (s, 3H), 2.21 (s, 3H); <sup>13</sup>C-NMR (100 MHz, CD<sub>3</sub>OD) δ (ppm) 172.1, 152.7, 144.5, 139.4, 138.2, 136.5, 131.5, 130.1, 129.8, 128.7, 124.9, 119.4, 100.2, 37.3, 28.1, 19.9; LRMS (ESI) calcd for C<sub>16</sub>H<sub>15</sub>ClINO<sub>2</sub>[M+H]<sup>+</sup>: 415.98, found 415.82.

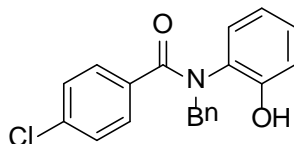

#### ***N*-benzyl-4-chloro-*N*-(2-hydroxyphenyl)benzamide ( 4x )**

Following the general procedure **II**, *N*-benzyl-4-chloro-*N*-phenylbenzamide (33 mg, 0.1 mmol), K<sub>2</sub>S<sub>2</sub>O<sub>8</sub> (81 mg, 0.3 mmol) and Pd(OAc)<sub>2</sub> (10 mol%, 0.01 mmol) were used with TFA: TFAA= 0.9 ml: 0.1 ml as solvent. The reaction mixture was stirred at 60 °C. in the sealed tube for 3 h. After completion of the reaction, the residue was purified by silica gel column chromatography (n-hexane: acetone= 4: 1). Finally, compound ( **4x** ) (21 mg) was isolated in 63% yield. <sup>1</sup>H-NMR (400 MHz, CD<sub>3</sub>OD) δ (ppm) 7.33 (d, *J* = 8.40 Hz, 2H), 7.29– 7.21 (m, 5H), 7.16 (d, *J* = 8.40 Hz, 2H), 6.99 (dt, *J* = 8.00 Hz, *J* = 1.60 Hz, 1H), 6.74 (dd, *J* = 8.00 Hz, *J* = 0.80 Hz, 1H), 6.57 (dd, *J* = 7.60 Hz, *J* = 1.60 Hz, 1H), 6.51 (dt, *J* = 7.60 Hz, *J* = 1.20 Hz, 1H), 5.51 (d, *J* = 14.40 Hz, 1H), 4.51 (d, *J* = 14.40 Hz, 1H); <sup>13</sup>C-NMR (100 MHz, CD<sub>3</sub>OD) δ (ppm) 172.73, 154.01, 138.52, 136.59, 136.40, 131.56, 130.61, 130.45, 130.26, 130.03, 129.28, 128.78, 128.45, 120.43, 117.39, 53.07; LRMS (ESI) calcd for C<sub>20</sub>H<sub>16</sub>ClNO<sub>2</sub>[M+H]<sup>+</sup>: 338.09, found 337.94.

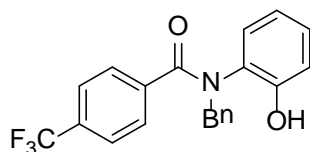

#### ***N*-benzyl-*N*-(2-hydroxyphenyl)-4-(trifluoromethyl)benzamide ( 4y )**

Following the general procedure **II**, *N*-benzyl-*N*-phenyl-4-(trifluoromethyl)benzamide (36 mg, 0.1 mmol), K<sub>2</sub>S<sub>2</sub>O<sub>8</sub> (81 mg, 0.3 mmol) and Pd(OAc)<sub>2</sub> (10 mol%, 0.01 mmol) were used with TFA: TFMA= 0.9 ml: 0.1 ml as solvent. The reaction mixture was stirred at 60 °C. in the sealed tube for 2 h. After completion of the reaction, the residue was purified by silica gel column chromatography (n-hexane: acetone= 4: 1). Finally, compound ( **4y** ) (24 mg) was isolated in 65% yield. <sup>1</sup>H-NMR (400 MHz, CD<sub>3</sub>OD) δ (ppm) 7.53 (d, *J* = 8.40 Hz, 2H), 7.46 (d, *J* = 8.40 Hz, 2H), 7.32–7.22 (m, 5H), 6.98 (dt, *J* = 7.80 Hz, *J* = 1.60 Hz, 1H), 6.73 (dd, *J* = 8.00 Hz, *J* = 1.20 Hz, 1H), 6.62 (dd, *J* = 7.60 Hz, *J* = 1.60 Hz, 1H), 6.51 (dt, *J* = 7.60 Hz, *J* = 1.20 Hz, 1H), 5.53 (d, *J* = 14.40 Hz, 1H), 4.54 (d, *J* = 14.40 Hz, 1H); <sup>13</sup>C-NMR (100 MHz, CD<sub>3</sub>OD) δ (ppm) 172.40, 154.05, 141.68, 138.37, 132.17 (q, *J*<sub>C-F</sub>= 32 Hz), 131.54, 130.46, 130.25, 130.06, 129.32, 129.30, 128.51, 125.55 (q, *J*<sub>C-F</sub>= 4 Hz), 125.21 (q, *J*<sub>C-F</sub>= 270 Hz), 120.44, 117.38, 53.07; LRMS (ESI) calcd for C<sub>21</sub>H<sub>16</sub>F<sub>3</sub>NO<sub>2</sub>[M+H]<sup>+</sup>: 372.11, found 372.10.

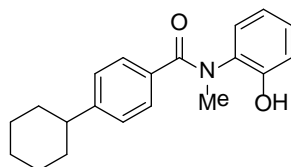

#### **4-Cyclohexyl-*N*-(2-hydroxyphenyl)-*N*-methylbenzamide ( 4z )**

Following the general procedure **II**, 4-cyclohexyl-*N*-methyl-*N*-phenylbenzamide (30 mg, 0.1 mmol), K<sub>2</sub>S<sub>2</sub>O<sub>8</sub> (54 mg, 0.2 mmol) and Pd(OAc)<sub>2</sub> (10 mol%, 0.01 mmol) were used with TFA: TFMA= 0.9 ml: 0.1 ml as solvent. The reaction mixture was stirred at 60 °C. in the sealed tube for 0.5 h. After completion of the reaction, the residue was purified by silica gel column chromatography (n-hexane: acetone= 4: 1). Finally, compound ( **4z** ) (16 mg) was isolated in 52% yield. <sup>1</sup>H-NMR (400 MHz, CD<sub>3</sub>OD) δ (ppm) 7.25 (d, *J* = 8.04 Hz, 2H), 6.99 – 7.05 (m, 3H), 6.91 (d, *J* = 7.52 Hz, 1H), 6.78 (d, *J* = 8.04 Hz, 1H), 6.66 (t, *J* = 7.48 Hz, 1H), 3.32 (s, 3H), 2.39 – 2.44 (m, 1H), 1.74 – 1.80 (m, 5H), 1.22 – 1.42 (m, 5H); <sup>13</sup>C-NMR (100 MHz, CD<sub>3</sub>OD) δ (ppm) 174.1, 154.0, 151.2, 134.9, 133.1, 130.4, 130.0, 129.1, 127.0, 120.9, 117.5, 45.7, 37.4, 35.4, 27.9, 27.1; LRMS (ESI) calcd for C<sub>20</sub>H<sub>23</sub>NO<sub>2</sub>[M+H]<sup>+</sup>: 310.17, found 310.48.

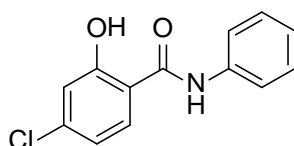

#### **4-Chloro-2-hydroxy-*N*-phenylbenzamide ( 5a )**

A mixture of *N*-benzyl-4-chloro-2-hydroxy-*N*-phenylbenzamide (34 mg, 0.1 mmol), EtOH (0.4 ml), AcOH (0.4 ml) in 4 ml HBr (48 wt.% in water) was stirred in a 25 ml round bottom flask for 11 h at 90 °C under an argon atmosphere. The product mixture was cooled to room temperature, dichloromethane was added to dilute the reaction mixture and saturated aqueous NaHCO<sub>3</sub> was added to neutralize acid. The organic layer was dried over anhydrous Na<sub>2</sub>SO<sub>4</sub>, and evaporated in vacuum to afford the crude product, which was further purified by silica gel column chromatography (petroleum ether: ethyl acetate= 4: 1). Finally, compound ( **5a** ) (17.5 mg) was isolated in 71% yield. <sup>1</sup>H-NMR (400 MHz, CD<sub>3</sub>OD) δ (ppm) 7.94 (d, *J* = 8.40 Hz, 1H), 7.65 (d, *J* = 7.60 Hz, 2H), 7.37 (t, *J* = 7.60 Hz, 2H), 7.16 (t, *J* = 7.20 Hz, 1H), 6.99 (d, *J* = 2.00 Hz, 1H), 6.97 (dd, *J* = 8.80 Hz, *J* = 2.00 Hz, 1H); <sup>13</sup>C-NMR (100 MHz, CD<sub>3</sub>OD) δ (ppm) 168.04, 161.42, 140.27, 139.08, 131.27, 129.88, 125.90, 122.57, 120.65, 118.33, 117.13; LRMS (ESI) calcd for C<sub>13</sub>H<sub>10</sub>ClNO<sub>2</sub>[M+H]<sup>+</sup>: 248.04, found 248.10.

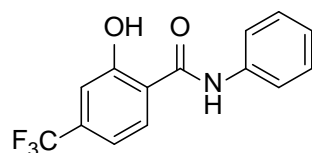

### 2-Hydroxy-*N*-phenyl-4-(trifluoromethyl)benzamide ( **5b** )

*N*-benzyl-2-hydroxy-*N*-phenyl-4-(trifluoromethyl)benzamide (38 mg, 0.1 mmol), Pd/C, and AcOH (1 ml) were placed in a round bottom flask (25 ml). The flask was purged with H<sub>2</sub> three times to remove air, and the reaction mixture was stirred with a balloon of H<sub>2</sub> at 70 °C for 4 h. The product mixture was cooled to room temperature, dichloromethane was added to dilute the reaction mixture and saturated aqueous NaHCO<sub>3</sub> was added to neutralize acid. The organic layer was dried over anhydrous Na<sub>2</sub>SO<sub>4</sub>, and evaporated in vacuum to afford the crude product, which was further purified by silica gel column chromatography (petroleum ether: ethyl acetate= 4: 1). Finally, compound ( **5b** ) (22 mg) was isolated in 78% yield. <sup>1</sup>H-NMR (400 MHz, CD<sub>3</sub>OD) δ (ppm) 8.11 (d, *J* = 8.68 Hz, 1H), 7.67 (d, *J* = 8.12 Hz, 2H), 7.37 (t, *J* = 7.84 Hz, 2H), 7.23–7.22 (m, 2H), 7.17 (t, *J* = 7.28 Hz, 1H); <sup>13</sup>C-NMR (100 MHz, CD<sub>3</sub>OD) δ (ppm) 167.41, 160.34, 138.99, 135.95 (q, *J*<sub>C-F</sub> = 33 Hz), 131.21, 129.91, 126.04, 124.92 (q, *J*<sub>C-F</sub> = 270 Hz), 122.51, 121.99, 116.61 (q, *J*<sub>C-F</sub> = 4 Hz), 115.22 (q, *J*<sub>C-F</sub> = 4 Hz); LRMS (ESI) calcd for C<sub>14</sub>H<sub>10</sub>F<sub>3</sub>NO<sub>2</sub>[M+H]<sup>+</sup>: 282.07, found 282.30.

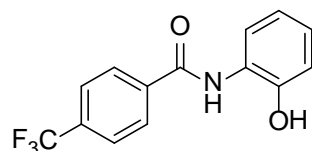

### *N*-(2-hydroxyphenyl)-4-(trifluoromethyl)benzamide ( **5c** )

*N*-benzyl-*N*-(2-hydroxyphenyl)-4-(trifluoromethyl)benzamide (38 mg, 0.1 mmol), Pd/C, and AcOH (1 ml) were placed in a round bottom flask (25 ml). The flask was purged with H<sub>2</sub> three times to remove air, and the reaction mixture was stirred with a balloon of H<sub>2</sub> at 70 °C for 4 h. The product mixture was cooled to room temperature, dichloromethane was added to dilute the reaction mixture and saturated aqueous NaHCO<sub>3</sub> was added to neutralize acid. The organic layer was dried over anhydrous Na<sub>2</sub>SO<sub>4</sub>, and evaporated in vacuum to afford the crude product, which was further purified by silica gel column chromatography (petroleum ether: ethyl acetate= 4: 1). Finally, compound ( **5c** ) (17.5 mg) was isolated in 63% yield. <sup>1</sup>H-NMR (400 MHz, CD<sub>3</sub>OD) δ (ppm) 8.10 (d, *J* = 8.00 Hz, 2H), 7.81–7.79 (m, 3H), 7.08–7.04 (m, 1H), 6.92 (dd, *J* = 8.00 Hz, *J* = 1.20 Hz, 1H), 6.87 (dt, *J* = 8.00 Hz, *J* = 1.20 Hz, 1H); <sup>13</sup>C-NMR (100 MHz, CD<sub>3</sub>OD) δ (ppm) 166.98, 150.29, 139.47, 134.26 (q, *J*<sub>C-F</sub> = 32 Hz), 129.28, 127.33, 126.73, 126.65 (q, *J*<sub>C-F</sub> = 4 Hz), 125.26 (q, *J*<sub>C-F</sub> = 270 Hz), 124.45, 120.73, 116.94; LRMS (ESI) calcd for C<sub>14</sub>H<sub>10</sub>F<sub>3</sub>NO<sub>2</sub>[M+H]<sup>+</sup>: 282.07, found 282.01.

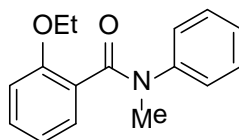

### 2-Ethoxy-*N*-methyl-*N*-phenylbenzamide ( **6a** )

A mixture of 2-hydroxy-*N*-methyl-*N*-phenylbenzamide (171 mg, 0.75 mmol) and t-BuOK (3 mmol) in THF (7 ml) was stirred in a round bottom flask (50 ml) at room temperature for 15 min. Then, EtI (3 mmol) was added slowly. The reaction mixture was stirred for 6 h at room temperature. The reaction was quenched by water and the mixture was washed once with saturated aqueous NaHCO<sub>3</sub>, extracted by DCM. The organic layer was dried over anhydrous Na<sub>2</sub>SO<sub>4</sub>, and evaporated in vacuum to afford the crude product, which was further purified by silica gel column chromatography (petroleum ether: ethyl acetate= 4: 1). Finally, compound ( **6a** ) (151 mg) was isolated in 79% yield. <sup>1</sup>H-NMR (400 MHz, CDCl<sub>3</sub>) δ (ppm) 7.18–7.05 (m, 7H), 6.78 (m, 1H), 6.59 (d, *J* = 6.80 Hz, 1H), 3.84 (m,

2H), 3.49 (s, 3H), 1.37 (m, 3H); <sup>13</sup>C-NMR (100 MHz, CDCl<sub>3</sub>) δ (ppm) 169.47, 154.53, 144.08, 130.24, 128.84, 128.43, 127.00, 126.77, 126.58, 120.15, 111.50, 63.52, 37.16, 14.89; LRMS (ESI) calcd for C<sub>16</sub>H<sub>17</sub>NO<sub>2</sub>[M+H]<sup>+</sup>: 256.13, found 256.19.

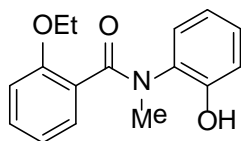

#### 2-Ethoxy-*N*-(2-hydroxyphenyl)-*N*-methylbenzamide ( **6b** )

Following the general procedure **II**, 2-ethoxy-*N*-methyl-*N*-phenylbenzamide (26 mg, 0.1 mmol), K<sub>2</sub>S<sub>2</sub>O<sub>8</sub> (68 mg, 0.25 mmol) and Pd(OAc)<sub>2</sub> (15 mol%, 0.015 mmol) were used with TFA: TFAA = 0.9 ml: 0.1 ml as solvent. The reaction mixture was stirred at 60 °C. in the sealed tube for 1.5 h. After completion of the reaction, the residue was purified by silica gel column chromatography (n-hexane: acetone = 4: 1). Finally, compound ( **6b** ) (15 mg) was isolated in 56% yield. <sup>1</sup>H-NMR (400 MHz, CD<sub>3</sub>OD) δ (ppm) 7.18 – 7.10 (m, 2H), 7.02 (d, *J* = 7.72 Hz, 1H), 6.96 (t, *J* = 7.28 Hz, 1H), 6.76 – 6.68 (m, 3H), 6.57 (t, *J* = 7.64 Hz, 1H), 3.98 (q, *J* = 6.92 Hz, 2H), 3.32 (s, 3H), 1.43 (t, *J* = 6.96 Hz, 3H); <sup>13</sup>C-NMR (100 MHz, CD<sub>3</sub>OD) δ (ppm) 172.67, 156.00, 154.00, 131.82, 131.30, 130.21, 129.58, 128.32, 127.94, 120.64, 120.12, 117.08, 112.46, 64.70, 36.24, 15.07; LRMS (ESI) calcd for C<sub>16</sub>H<sub>17</sub>NO<sub>3</sub>[M+H]<sup>+</sup>: 272.12, found 272.17.

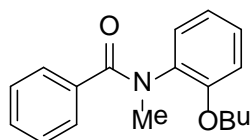

#### *N*-(2-butoxyphenyl)-*N*-methylbenzamide ( **6c** )

A mixture of *N*-(2-hydroxyphenyl)-*N*-methylbenzamide (227 mg, 1 mmol) and *t*-BuOK (8 mmol) in THF (7 ml) was stirred in a round bottom flask (50 ml) at room temperature for 15 min. Then, BuI (8 mmol) was added slowly. The reaction mixture was stirred for 16 h at room temperature. The reaction was quenched by water and the mixture was washed once with saturated aqueous NaHCO<sub>3</sub>, extracted by DCM. The organic layer was dried over anhydrous Na<sub>2</sub>SO<sub>4</sub>, and evaporated in vacuum to afford the crude product, which was further purified by silica gel column chromatography (petroleum ether: ethyl acetate = 10: 1). Finally, compound ( **6c** ) (170 mg) was isolated in 60% yield. <sup>1</sup>H-NMR (400 MHz, CDCl<sub>3</sub>) δ (ppm) 7.30 (d, *J* = 7.20 Hz, 2H), 7.17 – 7.09 (m, 4H), 6.96 (d, *J* = 5.60 Hz, 1H), 6.79 – 6.72 (m, 2H), 3.94 – 3.85 (m, 2H), 3.35 (s, 3H), 1.82 – 1.74 (m, 2H), 1.54 – 1.47 (m, 2H), 0.98 (t, *J* = 7.20 Hz, 3H); <sup>13</sup>C-NMR (100 MHz, CDCl<sub>3</sub>) δ (ppm) 171.55, 154.11, 136.43, 133.57, 129.49, 129.41, 128.67, 127.99, 127.46, 120.53, 112.33, 67.80, 37.08, 31.36, 19.38, 13.90; LRMS (ESI) calcd for C<sub>18</sub>H<sub>21</sub>NO<sub>2</sub>[M+H]<sup>+</sup>: 284.16, found 283.81.

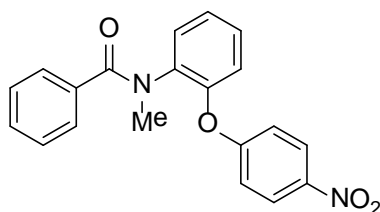

#### *N*-methyl-*N*-(2-(4-nitrophenoxy)phenyl)benzamide ( **6d** )

A mixture of *N*-(2-hydroxyphenyl)-*N*-methylbenzamide (68 mg, 0.3 mmol), 1-fluoro-4-nitrobenzene (47 mg, 0.33 mmol), K<sub>2</sub>CO<sub>3</sub> (207 mg, 1.5 mmol) in DMF (0.5 ml) was stirred in a round bottom flask (25 ml) at 50 °C for 5 h. The reaction was quenched by water and the mixture was washed once with saturated aqueous NaHCO<sub>3</sub>, extracted by DCM. The organic layer was dried over anhydrous Na<sub>2</sub>SO<sub>4</sub>, and evaporated in vacuum to afford the crude

product, which was further purified by silica gel column chromatography (petroleum ether: ethyl acetate= 4: 1). Finally, compound ( **6d** ) (88 mg) was isolated in 84% yield. <sup>1</sup>H-NMR (400 MHz, CDCl<sub>3</sub>) δ (ppm) 8.12 (d, *J* = 8.72 Hz, 2H), 7.40 (d, *J* = 6.48 Hz, 1H), 7.29 (d, *J* = 7.60 Hz, 2H), 7.25 – 7.13 (m, 5H), 6.87 – 6.77 (m, 3H), 3.34 (s, 3H); <sup>13</sup>C-NMR (100 MHz, CDCl<sub>3</sub>) δ (ppm) 170.89, 161.67, 150.04, 143.17, 136.54, 135.53, 129.89, 129.78, 128.82, 128.30, 127.68, 125.83, 125.79, 120.56, 117.42, 38.06; LRMS (ESI) calcd for C<sub>20</sub>H<sub>16</sub>N<sub>2</sub>O<sub>4</sub>[M+H]<sup>+</sup>: 349.11, found 349.20.

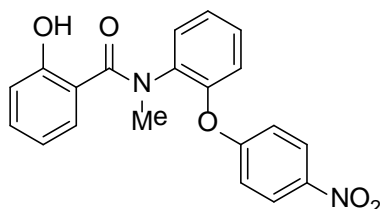

### 2-Hydroxy-*N*-methyl-*N*-(2-(4-nitrophenoxy)phenyl)benzamide ( **6e** )

Following the general procedure **I**, *N*-methyl-*N*-(2-(4-nitrophenoxy)phenyl)benzamide (70 mg, 0.2 mmol), K<sub>2</sub>S<sub>2</sub>O<sub>8</sub> (162 mg, 0.6 mmol) and [RuCl<sub>2</sub>(*p*-cymene)]<sub>2</sub> (5 mol%, 0.01 mmol) were used with TFA: TFAA= 1.8 ml: 0.2 ml as solvent. The reaction mixture was stirred at 60 °C. in the sealed tube for 6 h. After completion of the reaction, the residue was purified by silica gel column chromatography (n-hexane: acetone= 10: 1). Finally, compound ( **6e** ) (46 mg) was isolated in 63% yield. <sup>1</sup>H-NMR (400 MHz, CDCl<sub>3</sub>) δ (ppm) 10.33 (s, 1H), 8.07 (d, *J* = 9.16 Hz, 2H), 7.52 – 7.50 (m, 1H), 7.33 – 7.26 (m, 2H), 7.17 (dt, *J* = 7.76 Hz, *J* = 1.24 Hz, 1H), 6.91 – 6.86 (m, 2H), 6.77 (d, *J* = 8.28 Hz, 1H), 6.68 (d, *J* = 9.12 Hz, 2H), 6.46 (t, *J* = 7.52 Hz, 1H), 3.34 (s, 3H); <sup>13</sup>C-NMR (100 MHz, CDCl<sub>3</sub>) δ (ppm) 172.62, 161.47, 160.22, 149.79, 143.33, 137.16, 133.01, 129.16, 129.12, 129.09, 126.39, 125.92, 121.07, 117.98, 117.82, 117.33, 116.77, 38.78; LRMS (ESI) calcd for C<sub>20</sub>H<sub>16</sub>N<sub>2</sub>O<sub>5</sub>[M+H]<sup>+</sup>: 365.11, found 365.13.

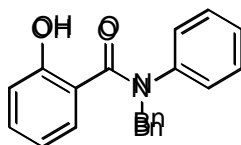

### *N*-benzyl-2-hydroxy-*N*-phenylbenzamide ( **6f** )

Following the general procedure **I**, *N*-benzyl-*N*-phenylbenzamide (29 mg, 0.1 mmol), K<sub>2</sub>S<sub>2</sub>O<sub>8</sub> (81 mg, 0.3 mmol) and [RuCl<sub>2</sub>(*p*-cymene)]<sub>2</sub> (5 mol%, 0.005 mmol) were used with TFA: TFAA= 0.9 ml: 0.1 ml as solvent. The reaction mixture was stirred at 60 °C. in the sealed tube for 5 h. After completion of the reaction, the residue was purified by silica gel column chromatography (n-hexane: acetone= 10: 1). Finally, compound ( **6f** ) (29 mg) was isolated in 96% yield. <sup>1</sup>H-NMR (400 MHz, CDCl<sub>3</sub>) δ (ppm) 10.72 (s, 1H), 7.22 – 7.06 (m, 9H), 6.92 (d, *J* = 7.60 Hz, 2H), 6.85 (d, *J* = 8.40 Hz, 1H), 6.64 (d, *J* = 8.00 Hz, 1H), 6.30 (t, *J* = 7.60 Hz, 1H), 5.05 (s, 2H); <sup>13</sup>C-NMR (100 MHz, CDCl<sub>3</sub>) δ (ppm) 171.44, 160.90, 143.88, 136.94, 132.94, 130.44, 129.63, 128.65, 128.47, 127.68, 127.42, 127.39, 117.97, 117.87, 116.27, 54.79; LRMS (ESI) calcd for C<sub>20</sub>H<sub>17</sub>NO<sub>2</sub>[M+H]<sup>+</sup>: 304.13, found 304.42.

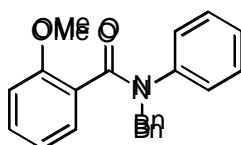

### *N*-benzyl-2-methoxy-*N*-phenylbenzamide ( **6g** )

A mixture of *N*-benzyl-2-hydroxy-*N*-phenylbenzamide (31 mg, 0.1 mmol) and *t*-BuOK (0.3 mmol) in THF (0.6 ml) was stirred in a round bottom flask (25 ml) at room temperature for 15 min. Then, MeI (0.3 mmol) was added slowly. The reaction mixture was stirred for 12 h at room temperature. The reaction was quenched by water and the mixture was washed once with saturated aqueous NaHCO<sub>3</sub>, extracted by DCM. The organic layer was dried over

anhydrous Na<sub>2</sub>SO<sub>4</sub>, and evaporated in vacuum to afford the crude product, which was further purified by silica gel column chromatography (petroleum ether: ethyl acetate= 4: 1). Finally, compound ( **6g** ) (28 mg) was isolated in 89% yield. <sup>1</sup>H-NMR (400 MHz, CDCl<sub>3</sub>) δ (ppm) 7.29 – 7.13 (m, 6H), 7.05 (t, *J* = 7.52 Hz, 1H), 6.96 – 6.94 (m, 3H), 6.82 (d, *J* = 6.52 Hz, 2H), 6.71 (t, *J* = 7.32 Hz, 1H), 6.53 (d, *J* = 8.24 Hz, 1H), 5.05 (s, 2H), 3.56 (s, 3H); <sup>13</sup>C-NMR (100 MHz, CDCl<sub>3</sub>) δ (ppm) 169.28, 155.13, 142.60, 137.75, 130.33, 128.72, 128.47, 128.44, 128.29, 127.76, 127.29, 126.91, 126.77, 120.28, 110.62, 55.20, 52.96; LRMS (ESI) calcd for C<sub>21</sub>H<sub>19</sub>NO<sub>2</sub>[M+H]<sup>+</sup>: 318.14, found 318.21.

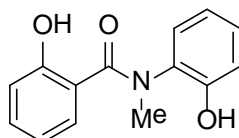

### 2-Hydroxy-*N*-(2-hydroxyphenyl)-*N*-methylbenzamide ( **6h** )

Following the general procedure **II**, 2-hydroxy-*N*-methyl-*N*-phenylbenzamide (23 mg, 0.1 mmol), K<sub>2</sub>S<sub>2</sub>O<sub>8</sub> (54 mg, 0.2 mmol) and Pd(OAc)<sub>2</sub> (15 mol%, 0.015 mmol) were used with TFA: TFAA= 0.9 ml: 0.1 ml as solvent. The reaction mixture was stirred at 60 °C. in the sealed tube for 1 h. After completion of the reaction, the residue was purified by silica gel column chromatography (n-hexane: acetone= 4: 1). Finally, compound ( **6h** ) (14.5 mg) was isolated in 60% yield. <sup>1</sup>H-NMR (400 MHz, CD<sub>3</sub>OD) δ (ppm) 7.07 – 7.01 (m, 4H), 6.75 (d, *J* = 7.60 Hz, 1H), 6.68 – 6.61 (m, 2H), 6.51 (t, *J* = 6.80 Hz, 1H), 3.31 (s, 3H); <sup>13</sup>C-NMR (100 MHz, CD<sub>3</sub>OD) δ (ppm) 173.21, 156.52, 153.83, 132.54, 131.85, 130.14, 129.58, 128.86, 123.74, 120.60, 119.31, 117.27, 116.79, 36.80; LRMS (ESI) calcd for C<sub>14</sub>H<sub>13</sub>NO<sub>3</sub>[M+H]<sup>+</sup>: 244.09, found 244.11.

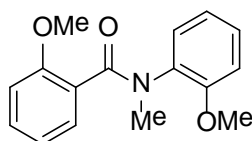

### 2-Methoxy-*N*-(2-methoxyphenyl)-*N*-methylbenzamide ( **6i** )

A mixture of 2-hydroxy-*N*-(2-hydroxyphenyl)-*N*-methylbenzamide (25 mg, 0.1 mmol) and t-BuOK (0.4 mmol) in THF (1 ml) was stirred in a round bottom flask (25 ml) at room temperature for 15 min. Then, MeI (0.4 mmol) was added slowly. The reaction mixture was stirred for 12 h at room temperature. The reaction was quenched by water and the mixture was washed once with saturated aqueous NaHCO<sub>3</sub>, extracted by DCM. The organic layer was dried over anhydrous Na<sub>2</sub>SO<sub>4</sub>, and evaporated in vacuum to afford the crude product, which was further purified by silica gel column chromatography (petroleum ether: ethyl acetate= 4: 1). Finally, compound ( **6i** ) (19 mg) was isolated in 70% yield. <sup>1</sup>H-NMR (400 MHz, CDCl<sub>3</sub>) δ (ppm) 7.14 (dd, *J* = 7.60 Hz, *J* = 1.60 Hz, 1H), 7.10 – 7.05 (m, 3H), 6.71 – 6.66 (m, 3H), 6.60 (d, *J* = 8.40 Hz, 1H), 3.76 (s, 3H), 3.68 (s, 3H), 3.35 (s, 3H); <sup>13</sup>C-NMR (100 MHz, CDCl<sub>3</sub>) δ (ppm) 169.80, 155.28, 154.69, 132.43, 130.02, 128.84, 128.80, 127.77, 126.84, 120.03, 119.76, 111.10, 110.31, 55.22, 55.19, 35.95; LRMS (ESI) calcd for C<sub>16</sub>H<sub>17</sub>NO<sub>3</sub>[M+H]<sup>+</sup>: 272.12, found 272.07.

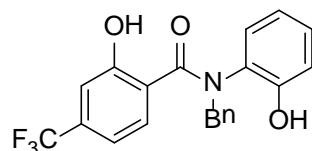

### *N*-benzyl-2-hydroxy-*N*-(2-hydroxyphenyl)-4-(trifluoromethyl)benzamide ( **6j** )

Following the general procedure **II**, *N*-benzyl-2-hydroxy-*N*-phenyl-4-(trifluoromethyl)benzamide (38 mg, 0.1 mmol), K<sub>2</sub>S<sub>2</sub>O<sub>8</sub> (68 mg, 0.25 mmol) and Pd(OAc)<sub>2</sub> (10 mol%, 0.01 mmol) were used with TFA: TFAA= 0.9 ml: 0.1 ml as solvent. The reaction mixture was stirred at 60 °C. in the sealed tube for 2 h. After completion of the reaction, the residue was purified by silica gel column chromatography (n-hexane: acetone= 4: 1). Finally, compound ( **6j** )

(26 mg) was isolated in 67% yield. <sup>1</sup>H-NMR (400 MHz, CD<sub>3</sub>OD) δ (ppm) 7.35 (d, *J* = 7.12 Hz, 2H), 7.30–7.20 (m, 4H), 6.95 (dt, *J* = 7.48 Hz, *J* = 1.32 Hz, 1H), 6.90 (s, 1H), 6.85 (d, *J* = 7.96 Hz, 1H), 6.77 (dd, *J* = 7.80 Hz, *J* = 1.20 Hz, 1H), 6.71 (d, *J* = 8.08 Hz, 1H), 6.44 (t, *J* = 7.48 Hz, 1H), 5.65 (d, *J* = 14.56 Hz, 1H), 4.39 (d, *J* = 14.56 Hz, 1H); <sup>13</sup>C-NMR (100 MHz, CD<sub>3</sub>OD) δ (ppm) 171.59, 155.86, 154.03, 138.34, 133.08 (q, *J*<sub>C-F</sub> = 32 Hz), 130.78, 130.54, 129.82, 129.74, 129.24, 129.18, 129.04, 128.36, 125.07 (q, *J*<sub>C-F</sub> = 270 Hz), 119.94, 117.04, 115.95 (q, *J*<sub>C-F</sub> = 4 Hz), 113.02 (q, *J*<sub>C-F</sub> = 4 Hz), 52.37; LRMS (ESI) calcd for C<sub>21</sub>H<sub>16</sub>F<sub>3</sub>NO<sub>3</sub>[M+H]<sup>+</sup>: 388.11, found 388.09.

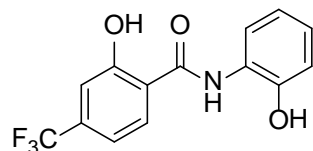

### 2-Hydroxy-*N*-(2-hydroxyphenyl)-4-(trifluoromethyl)benzamide ( **6k** )

*N*-benzyl-2-hydroxy-*N*-(2-hydroxyphenyl)-4-(trifluoromethyl)benzamide (39 mg, 0.1 mmol), Pd/C, and AcOH (1 ml) were placed in a round bottom flask (25 ml). The flask was purged with H<sub>2</sub> three times to remove air, and the reaction mixture was stirred with a balloon of H<sub>2</sub> at 70 °C for 4 h. The product mixture was cooled to room temperature, dichloromethane was added to dilute the reaction mixture and saturated aqueous NaHCO<sub>3</sub> was added to neutralize acid. The organic layer was dried over anhydrous Na<sub>2</sub>SO<sub>4</sub>, and evaporated in vacuum to afford the crude product, which was further purified by silica gel column chromatography (petroleum ether: ethyl acetate= 4: 1). Finally, compound ( **6k** ) (15.5 mg) was isolated in 52% yield. <sup>1</sup>H-NMR (400 MHz, CD<sub>3</sub>OD) δ (ppm) 8.23–8.20 (m, 2H), 7.26 (d, *J* = 8.40 Hz, 1H), 7.24 (s, 1H), 7.01–6.97 (m, 1H), 6.90–6.84 (m, 2H); <sup>13</sup>C-NMR (100 MHz, CD<sub>3</sub>OD) δ (ppm) 165.10, 158.58, 148.87, 135.68 (q, *J*<sub>C-F</sub> = 32 Hz), 132.77, 127.61, 126.07, 124.98 (q, *J*<sub>C-F</sub> = 270 Hz), 123.33, 122.66, 120.63, 117.05 (q, *J*<sub>C-F</sub> = 4 Hz), 115.88, 114.75 (q, *J*<sub>C-F</sub> = 4 Hz); LRMS (ESI) calcd for C<sub>14</sub>H<sub>10</sub>F<sub>3</sub>NO<sub>3</sub>[M+H]<sup>+</sup>: 298.06, found 298.04.

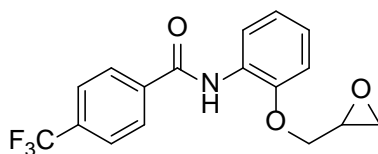

### *N*-(2-(oxiran-2-ylmethoxy)phenyl)-4-(trifluoromethyl)benzamide ( **6l** )

A mixture of *N*-(2-hydroxyphenyl)-4-(trifluoromethyl)benzamide (40 mg, 0.14 mmol) and Cs<sub>2</sub>CO<sub>3</sub> (0.42 mmol) in CH<sub>3</sub>CN (1.2 ml) was stirred in a round bottom flask (25 ml) at room temperature for 20 min. Then, 1-bromo-2,3-epoxypropane (0.56 mmol) was added slowly. The reaction mixture was stirred for 10 h at room temperature. The reaction was quenched by water and the mixture was washed once with saturated aqueous NaHCO<sub>3</sub>, extracted by DCM. The organic layer was dried over anhydrous Na<sub>2</sub>SO<sub>4</sub>, and evaporated in vacuum to afford the crude product, which was further purified by silica gel column chromatography (petroleum ether: ethyl acetate= 4: 1). Finally, compound ( **6l** ) (36.5 mg) was isolated in 77% yield. <sup>1</sup>H-NMR (400 MHz, CDCl<sub>3</sub>) δ (ppm) 8.09 (d, *J* = 8.40 Hz, 2H), 8.05 (d, *J* = 8.00 Hz, 1H), 7.79 (d, *J* = 8.00 Hz, 2H), 7.16 (dt, *J* = 7.80 Hz, *J* = 1.20 Hz, 1H), 7.07–7.00 (m, 2H), 4.45 (dd, *J* = 11.20 Hz, *J* = 2.00 Hz, 1H), 3.98 (dd, *J* = 11.60 Hz, *J* = 6.00 Hz, 1H), 3.42–3.38 (m, 1H), 2.91 (t, *J* = 4.40 Hz, 1H), 2.80 (dd, *J* = 4.80 Hz, *J* = 2.80 Hz, 1H); <sup>13</sup>C-NMR (100 MHz, CDCl<sub>3</sub>) δ (ppm) 164.81, 149.02, 137.68, 132.60 (q, *J*<sub>C-F</sub> = 32 Hz), 127.32, 126.54, 125.16, 124.92 (q, *J*<sub>C-F</sub> = 4 Hz), 123.25 (q, *J*<sub>C-F</sub> = 270 Hz), 122.24, 120.86, 112.29, 69.15, 49.50, 43.52; LRMS (ESI) calcd for C<sub>17</sub>H<sub>14</sub>F<sub>3</sub>NO<sub>3</sub>[M+H]<sup>+</sup>: 338.09, found 338.09.

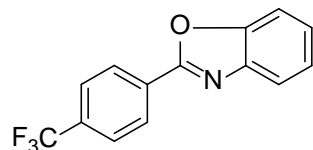

### 2-(4-(Trifluoromethyl)phenyl)benzo[d]oxazole ( **6m** )

*N*-(2-hydroxyphenyl)-4-(trifluoromethyl)benzamide (36.5 mg, 0.13 mmol), *p*-toluenesulfonic acid monohydrate (80 mg, 0.42 mmol) and toluene (1 ml) were placed in a round bottom flask (25 ml). The flask was purged with Ar three times to remove air, and the reaction mixture was stirred with a balloon of Ar at 110 °C for 3 h. The product mixture was cooled to room temperature. The reaction was quenched by water and the mixture was washed once with saturated aqueous NaHCO<sub>3</sub>, extracted by DCM. The organic layer was dried over anhydrous Na<sub>2</sub>SO<sub>4</sub>, and evaporated in vacuum to afford the crude product, which was further purified by silica gel column chromatography (petroleum ether: ethyl acetate= 15: 1). Finally, compound ( **6m** ) (20.5 mg) was isolated in 60% yield. <sup>1</sup>H-NMR (400 MHz, CDCl<sub>3</sub>) δ (ppm) 8.37 (d, *J* = 8.00 Hz, 2H), 7.83 – 7.78 (m, 3H), 7.63 – 7.59 (m, 1H), 7.43 – 7.37 (m, 2H); <sup>13</sup>C-NMR (100 MHz, CDCl<sub>3</sub>) δ (ppm) 161.62, 151.01, 142.05, 133.14 (q, *J*<sub>C-F</sub>= 32 Hz), 130.59, 128.00, 126.07 (q, *J*<sub>C-F</sub>= 4 Hz), 125.96, 125.09, 123.90 (q, *J*<sub>C-F</sub>= 271 Hz), 120.56, 110.95; LRMS (ESI) calcd for C<sub>14</sub>H<sub>8</sub>F<sub>3</sub>NO[M+H]<sup>+</sup>: 264.06, found 264.42.

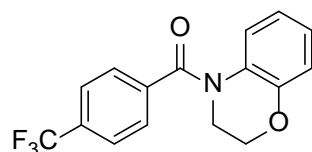

**(2*H*-benzo[*b*][1,4]oxazin-4(3*H*)-yl)(4-(trifluoromethyl)phenyl)methanone ( **6n** )**

To a 25 mL round bottom flask, *N*-(2-hydroxyphenyl)-4-(trifluoromethyl)benzamide (54 mg, 0.19 mmol), K<sub>2</sub>CO<sub>3</sub> (3.8 mmol), acetone (4 ml) were added, then 1,2-dibromoethane (1.52 mmol) was added. The reaction mixture was stirred for 5 h at 60 °C (under reflux). The reaction was quenched by water and the mixture was washed once with saturated aqueous NaHCO<sub>3</sub>, extracted by DCM. The organic layer was dried over anhydrous Na<sub>2</sub>SO<sub>4</sub>, and evaporated in vacuum to afford the crude product, which was further purified by silica gel column chromatography (petroleum ether: ethyl acetate= 10: 1). Finally, compound ( **6n** ) (37.5 mg) was isolated in 64% yield. <sup>1</sup>H-NMR (400 MHz, CDCl<sub>3</sub>) δ (ppm) 7.65 – 7.60 (m, 4H), 7.01 (dt, *J* = 7.80 Hz, *J* = 1.20 Hz, 1H), 6.92 (dd, *J* = 8.00 Hz, *J* = 1.20 Hz, 1H), 6.66 (t, *J* = 7.20 Hz, 1H), 4.39 (t, *J* = 4.40 Hz, 2H), 4.01 (t, *J* = 4.40 Hz, 2H); <sup>13</sup>C-NMR (100 MHz, CDCl<sub>3</sub>) δ (ppm) 167.35, 146.40, 138.86, 132.51 (q, *J*<sub>C-F</sub>= 33 Hz), 129.02, 126.29, 125.62 (q, *J*<sub>C-F</sub>= 4 Hz), 124.47, 123.73 (q, *J*<sub>C-F</sub>= 271 Hz), 120.18, 117.56, 66.56, 42.43; LRMS (ESI) calcd for C<sub>16</sub>H<sub>12</sub>F<sub>3</sub>NO<sub>2</sub>[M+H]<sup>+</sup>: 308.08, found 308.07.

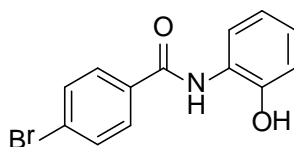

**4-Bromo-*N*-(2-hydroxyphenyl)benzamide ( **7a** )**

1)Following the general procedure **I**, 4-bromo-*N*-phenylbenzamide (30 mg, 0.1mmol), K<sub>2</sub>S<sub>2</sub>O<sub>8</sub> (81 mg, 0.3 mmol) and [RuCl<sub>2</sub>(*p*-cymene)]<sub>2</sub> (5 mol%, 0.005 mmol) were used with TFA: TFAA= 0.9 ml: 0.1 ml as solvent. The reaction mixture was stirred at 50 °C in the sealed tube for 4 h. After completion of the reaction, the residue was purified by silica gel column chromatography (Petroleum ether: Ethylacetate= 10: 1). Finally, compound ( **7a** ) (9.1 mg) was isolated in 31% yield.

2)Following the general procedure **II**, 4-bromo-*N*-phenylbenzamide (30 mg, 0.1mmol), K<sub>2</sub>S<sub>2</sub>O<sub>8</sub> (54 mg, 0.2 mmol) and Pd(OAc)<sub>2</sub> (10 mol%, 0.01 mmol) were used with TFA: TFAA= 0.9 ml: 0.1 ml as solvent. The reaction mixture was stirred at 50 °C. in the sealed tube for 4 h. After completion of the reaction, the residue was purified by silica gel column chromatography (Petroleum ether: Ethylacetate= 10: 1). Finally, compound ( **7a** ) (5.3 mg) was isolated in 18% yield. <sup>1</sup>H-NMR (400 MHz, (CD<sub>3</sub>)<sub>2</sub>SO) δ (ppm) 9.72 (s, 1H), 9.60 (s, 1H), 7.91 (d, *J* = 8.52 Hz, 2H), 7.73 (d, *J* = 8.52 Hz, 2H), 7.61 (dd, *J* = 7.88 Hz, *J* = 1.36 Hz, 1H), 7.05 (dt, *J* = 7.96 Hz, *J* = 1.60 Hz, 1H), 6.92 (dd, *J* = 8.08 Hz, *J* = 1.28 Hz, 1H), 6.83 (dt, *J* = 7.72 Hz, *J* = 1.32 Hz, 1H); <sup>13</sup>C-NMR (100 MHz, (CD<sub>3</sub>)<sub>2</sub>SO) δ (ppm) 164.4,



149.8, 133.6, 131.5, 129.8, 126.0, 125.6, 125.4, 124.7, 119.0, 116.0; LRMS (ESI) calcd for C<sub>13</sub>H<sub>10</sub>BrNO<sub>2</sub>[M+H]<sup>+</sup>: 291.99, found 291.95.

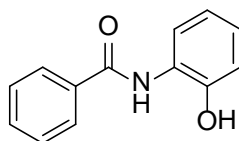

#### ***N*-(2-hydroxyphenyl)benzamide ( 7b )**

1)Following the general procedure **I**, *N*-phenylbenzamide (20 mg, 0.1mmol), K<sub>2</sub>S<sub>2</sub>O<sub>8</sub> (81 mg, 0.3 mmol) and [RuCl<sub>2</sub>(*p*-cymene)]<sub>2</sub> (5 mol%, 0.005 mmol) were used with TFA: TFAA= 0.9 ml: 0.1 ml as solvent. The reaction mixture was stirred at 50 °C in the sealed tube for 2.5 h. After completion of the reaction, the residue was purified by silica gel column chromatography (Petroleum ether: Ethylacetate= 10: 1). Finally, compound ( **7b** ) (6.6 mg) was isolated in 31% yield.

2)Following the general procedure **II**, *N*-phenylbenzamide (20 mg, 0.1mmol), K<sub>2</sub>S<sub>2</sub>O<sub>8</sub> (54 mg, 0.2 mmol) and Pd(OAc)<sub>2</sub> (10 mol%, 0.01 mmol) were used with TFA: TFAA= 0.9 ml: 0.1 ml as solvent. The reaction mixture was stirred at 20 °C. in the sealed tube for 8 h. After completion of the reaction, the residue was purified by silica gel column chromatography (Petroleum ether: Ethylacetate= 10: 1). Finally, compound ( **7b** ) (6.8 mg) was isolated in 32% yield. <sup>1</sup>H-NMR (400 MHz, (CD<sub>3</sub>)<sub>2</sub>SO) δ (ppm) 9.75 (s, 1H), 9.52 (s, 1H), 7.98 (d, *J* = 7.20 Hz, 2H), 7.70 (dd, *J* = 8.00 Hz, *J* = 1.20 Hz, 1H), 7.60 (t, *J* = 7.20 Hz, 1H), 7.53 (t, *J* = 7.60 Hz, 2H), 7.05 (dt, *J* = 8.00 Hz, *J* = 1.20 Hz, 1H), 6.94 (dd, *J* = 8.00 Hz, *J* = 0.8 Hz, 1H), 6.84 (dt, *J* = 8.00 Hz, *J* = 1.20 Hz, 1H); <sup>13</sup>C-NMR (100 MHz, (CD<sub>3</sub>)<sub>2</sub>SO) δ (ppm) 165.3, 149.3, 134.4, 131.7, 128.5, 127.5, 125.9, 125.7, 124.1, 119.0, 116.0; LRMS (ESI) calcd for C<sub>13</sub>H<sub>11</sub>NO<sub>2</sub>[M+H]<sup>+</sup>: 214.08, found 214.06.

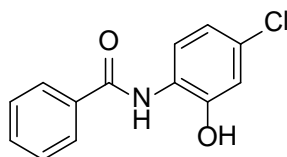

#### ***N*-(4-chloro-2-hydroxyphenyl)benzamide ( 7c )**

1)Following the general procedure **I**, *N*-(4-chlorophenyl)benzamide (24 mg, 0.1mmol), K<sub>2</sub>S<sub>2</sub>O<sub>8</sub> (81 mg, 0.3 mmol) and [RuCl<sub>2</sub>(*p*-cymene)]<sub>2</sub> (5 mol%, 0.005 mmol) were used with TFA: TFAA= 0.9 ml: 0.1 ml as solvent. The reaction mixture was stirred at 50 °C in the sealed tube for 9 h. After completion of the reaction, the residue was purified by silica gel column chromatography (Petroleum ether: Ethylacetate= 10: 1). Finally, compound ( **7c** ) (12.6 mg) was isolated in 51% yield.

2)Following the general procedure **II**, *N*-(4-chlorophenyl)benzamide (24 mg, 0.1mmol), K<sub>2</sub>S<sub>2</sub>O<sub>8</sub> (54 mg, 0.2 mmol) and Pd(OAc)<sub>2</sub> (10 mol%, 0.01 mmol) were used with TFA: TFAA= 0.9 ml: 0.1 ml as solvent. The reaction mixture was stirred at 50 °C. in the sealed tube for 5 h. After completion of the reaction, the residue was purified by silica gel column chromatography (Petroleum ether: Ethylacetate= 10: 1). Finally, compound ( **7c** ) (8.2 mg) was isolated in 33% yield. <sup>1</sup>H-NMR (400 MHz, (CD<sub>3</sub>)<sub>2</sub>SO) δ (ppm) 10.29 (s, 1H), 9.50 (s, 1H), 7.96 (d, *J* = 7.20 Hz, 2H), 7.69 (d, *J* = 8.80 Hz, 1H), 7.60 (t, *J* = 7.60 Hz, 1H), 7.53 (t, *J* = 7.60 Hz, 2H), 6.95 (d, *J* = 2.40 Hz, 1H), 6.89 (dd, *J* = 8.40 Hz, *J* = 2.40 Hz, 1H); <sup>13</sup>C-NMR (100 MHz, (CD<sub>3</sub>)<sub>2</sub>SO) δ (ppm) 165.2, 150.6, 134.2, 131.7, 129.0, 128.5, 127.5, 125.5, 125.0, 118.7, 115.5; LRMS (ESI) calcd for C<sub>13</sub>H<sub>10</sub>ClNO<sub>2</sub>[M+H]<sup>+</sup>: 248.04, found 248.01.

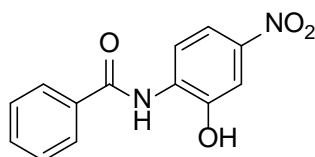

### ***N*-(2-hydroxy-4-nitrophenyl)benzamide (7d)**

1) Following the general procedure **I**, *N*-(4-nitrophenyl)benzamide (25 mg, 0.1 mmol), K<sub>2</sub>S<sub>2</sub>O<sub>8</sub> (81 mg, 0.3 mmol) and [RuCl<sub>2</sub>(*p*-cymene)]<sub>2</sub> (5 mol%, 0.005 mmol) were used with TFA: TFAA= 0.9 ml: 0.1 ml as solvent. The reaction mixture was stirred at 60 °C in the sealed tube for 6 h. After completion of the reaction, the residue was purified by silica gel column chromatography (Petroleum ether: Ethylacetate= 10: 1). Finally, compound (**7d**) (12.1 mg) was isolated in 47% yield.

2) Following the general procedure **II**, *N*-(4-nitrophenyl)benzamide (25 mg, 0.1 mmol), K<sub>2</sub>S<sub>2</sub>O<sub>8</sub> (54 mg, 0.2 mmol) and Pd(OAc)<sub>2</sub> (10 mol%, 0.01 mmol) were used with TFA: TFAA= 0.9 ml: 0.1 ml as solvent. The reaction mixture was stirred at 50 °C in the sealed tube for 4 h, then 60 °C for 2 h. After completion of the reaction, the residue was purified by silica gel column chromatography (Petroleum ether: Ethylacetate= 10: 1). Finally, compound (**7d**) (10.8 mg) was isolated in 42% yield. <sup>1</sup>H-NMR (400 MHz, (CD<sub>3</sub>)<sub>2</sub>SO) δ (ppm) 9.59 (s, 1H), 8.23 (d, *J* = 9.20 Hz, 1H), 7.97 (d, *J* = 7.60 Hz, 2H), 7.79 (dd, *J* = 8.80 Hz, *J* = 2.40 Hz, 1H), 7.74 (d, *J* = 2.40 Hz, 1H), 7.64 (t, *J* = 7.20 Hz, 1H), 7.56 (t, *J* = 7.60 Hz, 2H); <sup>13</sup>C-NMR (100 MHz, (CD<sub>3</sub>)<sub>2</sub>SO) δ (ppm) 165.4, 148.4, 143.4, 133.9, 133.0, 132.2, 128.7, 127.6, 121.7, 115.0, 109.5; LRMS (ESI) calcd for C<sub>13</sub>H<sub>10</sub>N<sub>2</sub>O<sub>4</sub>[M+H]<sup>+</sup>: 259.06, found 259.01.

## **Computational part:**

### **Computational details**

All the calculations were carried out with the Gaussian 09 package.<sup>1</sup> Geometry optimizations were performed with B3LYP<sup>2</sup>. LANL2DZ+f (1.235 for Ru, 1.472 for Pd) basis set<sup>3</sup> with effective core potential (ECP) was used for Pd and Ru, and the 6-31G (d) basis set<sup>4</sup> was used for other atoms. Frequency was calculated at the same level of theory to obtain zero-point energy (ZPE) corrections and to verify the stationary points to be minima or saddle points. Single-point energies were conducted by using B3LYP/[SDD<sup>5</sup> for Pd and Ru, 6-311++G(d,p)<sup>6</sup> for others]. Solvent effects were evaluated with SMD solvation model (Solvent=Acetic Acid).<sup>7</sup> The relative energies with ZPE corrections and free energies (at 298.15K) are in kcal/mol.

### **1. Potential energy surface (PES) of C-H activation**

Potential energy surface (PES) and related structures of Pd and Ru Catalyzed C-H Activation are shown in **Figures S1** and **S2**, respectively. Free energies ΔG (electronic energies Δ(E+ZPE) in parentheses) are in kcal/mol. Since our previous KIE experiment revealed that the C-H activation step is involved in the rate-determining step<sup>8-9</sup>, we envisage that the relative energy between different transition states of C-H cleavage may determine the regioselectivity, the elementary steps after the C-H activation step had not been considered. Recent mechanistic studies on the carboxylate-assisted transition-metal catalyzed C-H activation supported that the concerted metalation-deprotonation (CMD) mechanism with an inner- or outer-sphere base was the most favorable mechanism (abbreviated as innersphere\_CMD and outersphere\_CMD respectively).<sup>11</sup> For Pd, the Δ(E+ZPE)<sup>‡</sup> of the outersphere\_CMD mechanism is more favorable than the innersphere\_CMD mechanism. It has been noticed, if the number of molecules changes during the reaction, the entropy contribution to the reaction Gibbs energy change is largely overestimated<sup>12</sup>, Δ(E+ZPE)<sup>‡</sup> is preferred over ΔG<sup>‡</sup> to describe the change of energy. Therefore, the outersphere\_CMD was chosen as the mechanism for C-H activation for Pd catalyst. However, for Ru, whether considering Δ(E+ZPE)<sup>‡</sup> or ΔG<sup>‡</sup>, the innersphere\_CMD mechanism has lower energy barrier than the outersphere\_CMD mechanism. Therefore, the innersphere\_CMD mechanism is more favorable for Ru catalyst.

The agostic interactions have been considered. **INT1-ag**, **INT2-ag**, **TS3-ag**, **TS4-ag**, **INT3-ag**, and **INT4-ag** are relevant structures (Figures S1 and S2). The energies of transition states of agostic interactions are about lower

than these of C-H activation. Therefore, the C-H activation step is still the rate-determining step which is also consistent with the KIE results and the regioselectivity could not be influenced by the agnostic interactions.

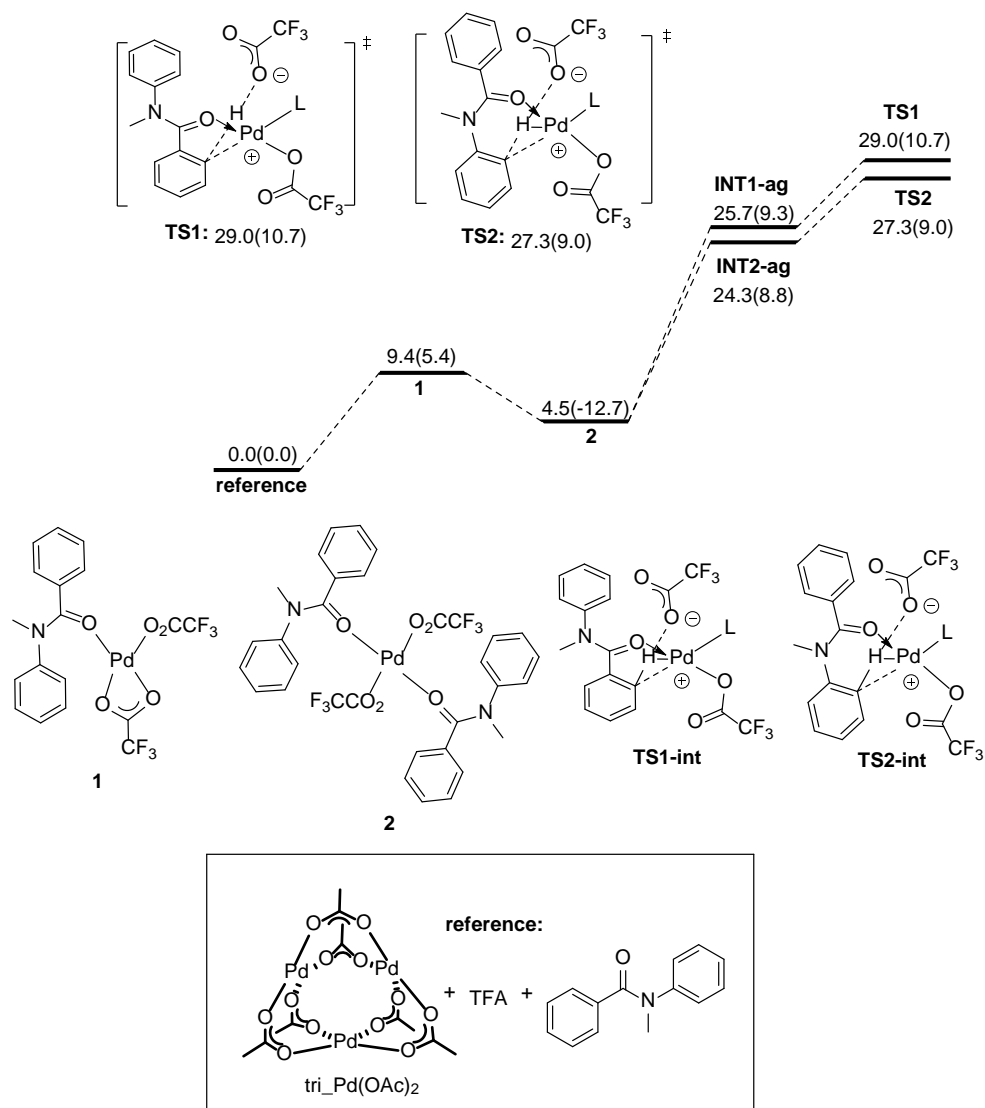

**Figure S1.** Potential energy surface and related structures for Pd catalyst (in kcal/mol).

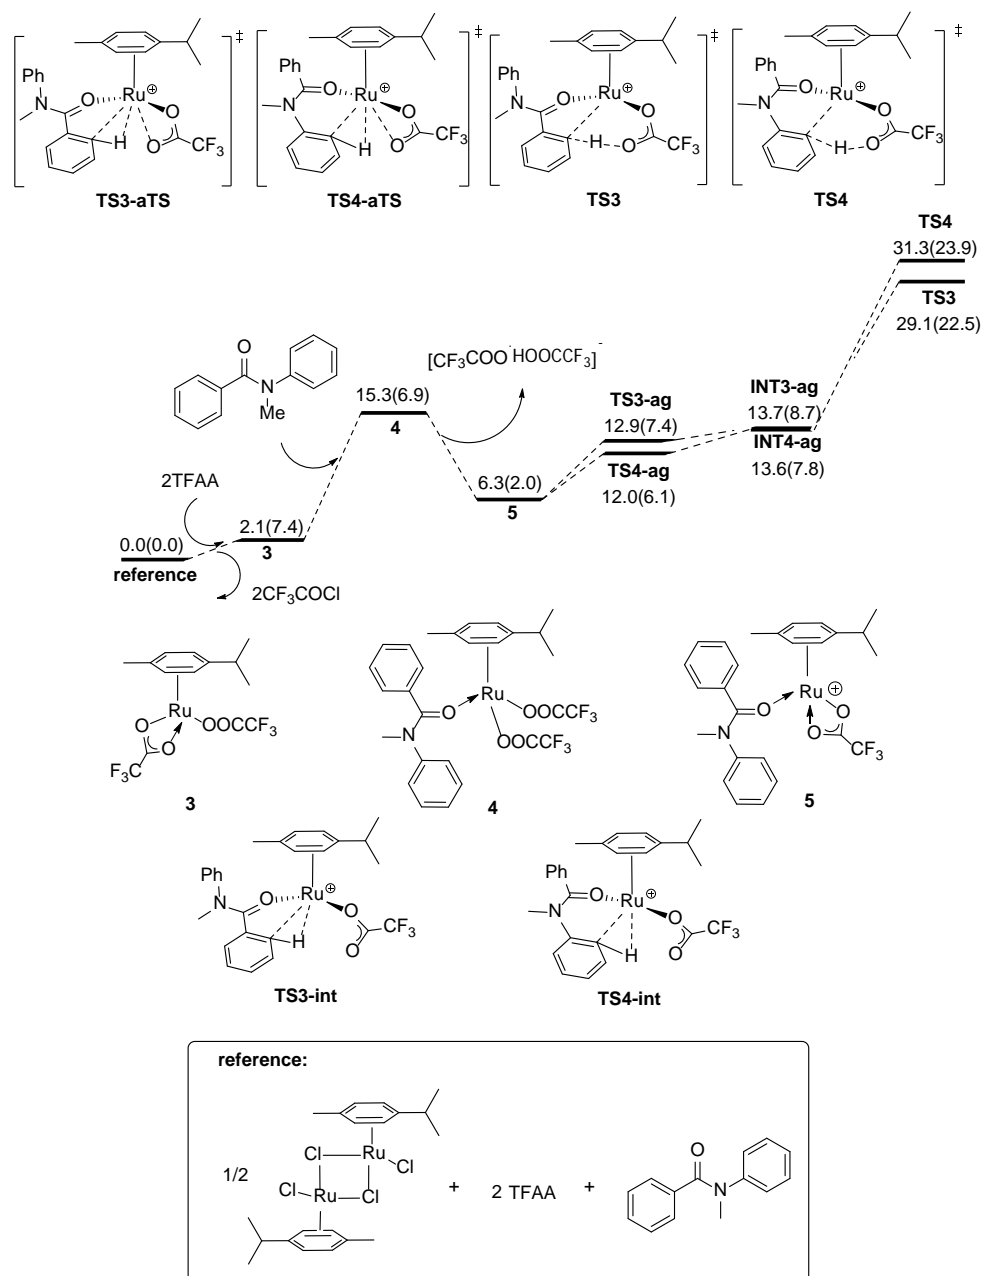

**Figure S2.** Potential energy surface and related structures for Ru catalyst (in kcal/mol).

## 2. Model calculations to examine the role of steric factor in Ru-catalyzed transition states

As shown in **Figure S3**, calculations were performed on models to verify if the steric factor is important. Firstly, the p-cymene cap was replaced by three carbon monoxide, which is much smaller. The steric repulsion between the cap and the activated benzene ring are therefore largely eliminated. In this case, the regioselectivity is reversed, i.e. TS4\_3CO becomes preferred. Moreover, to a further extreme, the p-cymene cap was deleted to eliminate the steric factor completely. The computational results reveal that the regioselectivity is reversed (**TS3\_no\_cap** and **TS4\_no\_cap**). Therefore, the conclusion was drawn that steric repulsion plays an important role for the regioselectivity.

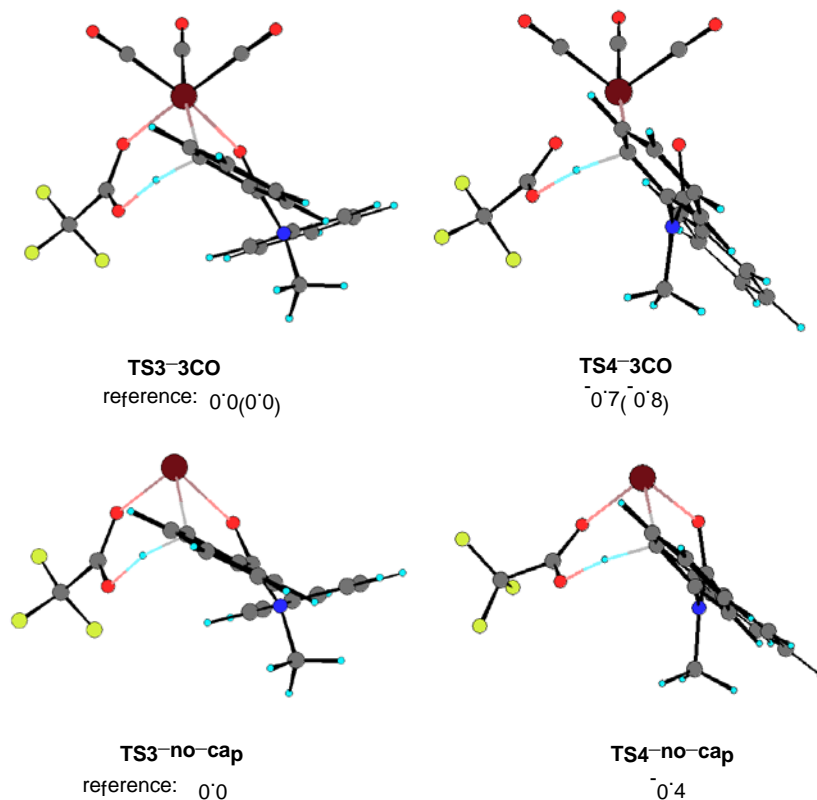

**Figure S3.** Relative energies (in kcal/mol) of the transition state of Ru-catalyzed C-H activation on model systems.

### 3. Energies of Optimized Molecular Structures

Activation free energies (activation electronic energies in parentheses) are in kcal/mol.

| Geometry                                               | E(M06)+ZPE   | G            | $\Delta(E+ZPE)$ | $\Delta G$ |
|--------------------------------------------------------|--------------|--------------|-----------------|------------|
| [RuCl <sub>2</sub> (p-cymene)] <sub>2</sub>            | -2809.77756  | -2809.841026 | 0.0             | 0.0        |
| TFA                                                    | -526.9291171 | -526.9606541 | --              | --         |
| TFAA                                                   | -977.387229  | -977.428868  | --              | --         |
| N-methyl-benzanilide                                   | -671.2495917 | -671.2911697 | --              | --         |
| CF <sub>3</sub> COCl                                   | -911.2947495 | -911.3268495 | --              | --         |
| HCl                                                    | -460.8322102 | -460.8501022 | --              | --         |
| [CF <sub>3</sub> COO·OOCCF <sub>3</sub> ] <sup>·</sup> | -1053.443008 | -1053.489274 | -14.5           | -3.8       |
| CF <sub>3</sub> COO <sup>·</sup>                       | -526.4907995 | -526.5226265 | --              | --         |
| TS0                                                    | -1357.231807 | -1357.291296 | --              | --         |
| 1                                                      | -1851.88095  | -1851.948495 | 5.4             | 9.4        |
| 2                                                      | -2523.159371 | -2523.247436 | -12.7           | 4.5        |
| 3                                                      | -1537.061965 | -1537.121141 | 7.4             | 2.1        |
| TS3-aTS                                                | -1681.797701 | -1681.866528 | 7.4             | 12.9       |
| TS4-aTS                                                | -1681.799642 | -1681.867991 | 6.1             | 12.0       |
| TS3-int                                                | -1681.795608 | -1681.865232 | 8.7             | 13.7       |
| TS4-int                                                | -1681.796952 | -1681.865378 | 7.8             | 13.6       |
| TS3                                                    | -1681.773632 | -1681.840801 | 22.5            | 29.1       |
| TS4                                                    | -1681.771305 | -1681.837244 | 23.9            | 31.3       |
| tri_Pd(OAc) <sub>2</sub>                               | -1754.988215 | -1755.060059 | 0.0             | 0.0        |
| 4                                                      | -2208.312369 | -2208.39126  | 6.9             | 15.3       |
| 5                                                      | -1681.806259 | -1681.877102 | 2.1             | 6.3        |
| TS1-int                                                | -2523.124246 | -2523.078864 | 9.3             | 25.7       |
| TS2-int                                                | -2523.12511  | -2523.215926 | 8.8             | 24.3       |
| TS1                                                    | -2523.12202  | -2523.208406 | 10.7            | 29.0       |
| TS2                                                    | -2523.124721 | -2523.211112 | 9.0             | 27.3       |
| TS1_inner                                              | -1851.854365 | -1851.921541 | 22.0            | 26.3       |
| TS2_inner                                              | -1851.860918 | -1851.925594 | 17.9            | 23.8       |
| TS3_benzene                                            | -1524.574656 | -1524.634275 | --              | --         |
| TS3_p-dimethylbenzene_cf1                              | -1603.180839 | -1603.244986 | --              | --         |
| TS3_p-dimethylbenzene_cf2                              | -1603.182109 | -1603.245493 | --              | --         |
| TS3_p-dimethylbenzene_cf3                              | -1603.180715 | -1603.243827 | --              | --         |
| TS3_cf2                                                | -1681.771963 | -1681.8384   | --              | --         |
| TS3_cf3                                                | -1681.772531 | -1681.839198 | --              | --         |
| TS4_benzene                                            | -1524.572608 | -1524.632257 | --              | --         |
| TS4_p-dimethylbenzene_cf1                              | -1603.177386 | -1603.240831 | --              | --         |
| TS4_p-dimethylbenzene_cf2                              | -1603.180211 | -1603.243096 | --              | --         |
| TS4_p-dimethylbenzene_cf3                              | -1603.180207 | -1603.243091 | --              | --         |
| TS4_cf2                                                | -1681.769887 | -1681.836695 | --              | --         |
| TS4_cf3                                                | -1681.768873 | -1681.83495  | --              | --         |

|                             |              |              |      |      |
|-----------------------------|--------------|--------------|------|------|
| TS3_outer                   | -2208.276118 | -2208.354534 | 29.6 | 38.4 |
| TS4_outer                   | -2208.277787 | -2208.356248 | 28.6 | 37.3 |
| TS5                         | -1642.496537 | -1642.56381  | 24.6 | 29.9 |
| TS6                         | -1642.497389 | -1642.56506  | 24.1 | 29.1 |
| TS5_no_H                    | -1642.049475 | -1642.113308 | 52.7 | 48.2 |
| TS6_no_H                    | -1642.036501 | -1642.102636 | 44.6 | 41.5 |
| TS3_3CO                     | -1632.480182 | -1632.542028 |      |      |
| TS4_3CO                     | -1632.481311 | -1632.543192 |      |      |
| TS3_no_cap (only E(B3LYP) ) | -1292.576263 | --           | --   | --   |
| TS4_no_cap (only E(B3LYP) ) | -1292.576852 | --           | --   | --   |

#### 4. Reference

- (1) Gaussian 09, Revision A.02, M. J. Frisch, G. W. Trucks, H. B. Schlegel, G. E. Scuseria, M. A. Robb, J. R. Cheeseman, G. Scalmani, V. Barone, B. Mennucci, G. A. Petersson, H. Nakatsuji, M. Caricato, X. Li, H. P. Hratchian, A. F. Izmaylov, J. Bloino, G. Zheng, J. L. Sonnenberg, M. Hada, M. Ehara, K. Toyota, R. Fukuda, J. Hasegawa, M. Ishida, T. Nakajima, Y. Honda, O. Kitao, H. Nakai, T. Vreven, J. A. Montgomery, Jr., J. E. Peralta, F. Ogliaro, M. Bearpark, J. J. Heyd, E. Brothers, K. N. Kudin, V. N. Staroverov, R. Kobayashi, J. Normand, K. Raghavachari, A. Rendell, J. C. Burant, S. S. Iyengar, J. Tomasi, M. Cossi, N. Rega, J. M. Millam, M. Klene, J. E. Knox, J. B. Cross, V. Bakken, C. Adamo, J. Jaramillo, R. Gomperts, R. E. Stratmann, O. Yazyev, A. J. Austin, R. Cammi, C. Pomelli, J. W. Ochterski, R. L. Martin, K. Morokuma, V. G. Zakrzewski, G. A. Voth, P. Salvador, J. J. Dannenberg, S. Dapprich, A. D. Daniels, O. Farkas, J. B. Foresman, J. V. Ortiz, J. Cioslowski, and D. J. Fox, *Gaussian, Inc., Wallingford CT*, 2009.
- (2) (a) A. D. Becke, *J. Chem. Phys.*, 1993, **98**, 5648; (b) C. Lee, W. Yang and R. G. Parr, *Phys. Rev. B* 1988, **37**, 785; (c) A. D. Becke, *J. Chem. Phys.*, 1993, **98**, 1372; (d) P. J. Stephens, F. J. Devlin, C. F. Chabalowski and M. J. Frisch, *J. Phys. Chem.*, 1994, **98**, 1623.
- (3) (a) P. J. Hay and W. R. Wadt, *J. Chem. Phys.*, 1985, **82**, 299; (b) L. E. Roy, P. J. Hay and R. L. Martin, *J. Chem. Theory Comput.*, 2008, **4**, 1029; (c) A. W. Ehlers, M. Böhme, S. Dapprich, A. Gobbi, A. Höllwarth, V. Jonas, K. F. Köhler, R. Stegmann, A. Veldkamp and G. Frenking, *Chem. Phys. Lett.*, 1993, **208**, 111.
- (4) (a) R. Ditchfield, W. J. Hehre and J. A. Pople, *J. Chem. Phys.*, 1971, **54**, 724; (b) W. J. Hehre, R. Ditchfield, and J. A. Pople, *J. Chem. Phys.*, 1971, **54**, 2257; (c) P. C. Hariharan and J. A. Pople, *Theor. Chim. Acta.*, 1973, **28**, 213.
- (5) (a) M. Dolg, U. Wedig, H. Stoll and H. Preuss, *J. Chem. Phys.*, 1987, **86**, 866; (b) D. Andrae, U. Häußermann, M. Dolg, H. Stoll and H. Preuß, *Theor. Chem. Acc.*, 1990, **77**, 123.
- (6) R. Krishnan, J. S. Binkley, R. Seeger and J. A. Pople, *J. Chem. Phys.*, 1980, **72**, 650.
- (7) A. V. Marenich, C. J. Cramer and D. G. Truhlar, *J. Phys. Chem. B* 2009, **113**, 6378.
- (8) G. Shan, X. Yang, L. Ma and Y. Rao, *Angew. Chem., Int. Ed.*, 2012, **51**, 13070.
- (9) Y. Yang, Y. Lin and Y. Rao, *Org. Lett.*, 2012, **14**, 2874.
- (10) R. Giri, Y. Lan, P. Liu, K. N. Houk and J.-Q. Yu, *J. Am. Chem. Soc.*, 2012, **134**, 14118.
- (11) (a) D. L. Davies, S. M. A. Donald and S. A. Macgregor, *J. Am. Chem. Soc.*, 2005, **127**, 13754; (b) Y. Boutadla, D. L. Davies, S. A. Macgregor and A. I. Poblador-Bahamonde, *Dalton Trans.*, 2009, 5820; (c) S. I. Gorelsky, D. Lapointe and K. Fagnou, *J. Org. Chem.*, 2011, **77**, 658; (d) L. Ackermann, *Chem. Rev.*, 2011, **111**, 1315.
- (12) (a) Y. Cao, S. Osuna, Y. Liang, R. C. Haddon and K. N. Houk, *J. Am. Chem. Soc.*, 2013, **135**, 17643–17649; (b) D. F. P. Crépin, J. P. A. Harrity, J. Jiang, A. J. H. M. Meijer, A. M. A. Nassoy and P. Raubo, *J. Am. Chem. Soc.*, 2014, **136**, 8642–8653.

## 5. Cartesian Coordinates

[RuCl<sub>2</sub>(*p*-cymene)]<sub>2</sub>

|    |             |             |             |
|----|-------------|-------------|-------------|
| C  | 3.24504600  | 1.27032300  | 0.02557800  |
| C  | 3.37150300  | 0.42130500  | -1.09342600 |
| C  | 3.63933000  | -0.97963800 | -0.93638000 |
| C  | 3.82019800  | -1.56853000 | 0.33790300  |
| C  | 3.65826400  | -0.71291600 | 1.48262700  |
| C  | 3.36721700  | 0.66059500  | 1.32729800  |
| H  | 3.15967700  | 0.80157500  | -2.08509200 |
| H  | 3.65926000  | -1.15063000 | 2.47501900  |
| Ru | 1.84969700  | -0.50677900 | 0.25852000  |
| H  | 3.63536000  | -1.61516100 | -1.81610500 |
| H  | 3.15571800  | 1.25769600  | 2.20874000  |
| Cl | 0.28708900  | -0.94317100 | -1.64516500 |
| Cl | -0.02165800 | 0.99444300  | 0.96207200  |
| C  | -2.48423600 | -2.00889900 | 0.02773200  |
| C  | -3.03746700 | -1.68353100 | -1.25994700 |
| C  | -3.75556400 | -0.46853200 | -1.38802700 |
| C  | -3.91706600 | 0.41568900  | -0.27257500 |
| C  | -3.36151300 | 0.10505800  | 0.99341400  |
| C  | -2.64092200 | -1.13707200 | 1.11958500  |
| H  | -1.81635600 | -2.85702200 | 0.13022800  |
| H  | -4.37160000 | 1.38369300  | -0.44256900 |
| Ru | -1.77756400 | 0.01964800  | -0.57000500 |
| H  | -4.09676300 | -0.14896300 | -2.36657800 |
| H  | -2.09044100 | -1.34696300 | 2.03052000  |
| Cl | 0.76957800  | -2.30621500 | 1.50470700  |
| Cl | -1.51927800 | 1.96707300  | -1.97674700 |
| C  | 4.07358500  | -3.04003300 | 0.50939700  |
| H  | 3.38141400  | -3.46018400 | 1.24543700  |
| H  | 3.93695300  | -3.57594000 | -0.43387600 |
| H  | 5.10151600  | -3.20825600 | 0.85527500  |
| C  | -2.80487200 | -2.58573000 | -2.44075000 |
| H  | -2.93423900 | -2.04634100 | -3.38302500 |
| H  | -1.79496800 | -3.00416000 | -2.41749800 |
| H  | -3.52163800 | -3.41722400 | -2.41853800 |
| C  | 2.94086900  | 2.75404600  | -0.07749500 |
| H  | 2.24609800  | 2.98416200  | 0.74029300  |
| C  | 2.26462300  | 3.17099300  | -1.38961600 |
| H  | 1.33420300  | 2.62069600  | -1.56146800 |
| H  | 2.01691500  | 4.23693900  | -1.34542000 |
| H  | 2.92887100  | 3.03126100  | -2.25207900 |
| C  | 4.24308200  | 3.54980500  | 0.16357000  |
| H  | 4.02806800  | 4.62391100  | 0.16958600  |



|   |             |             |             |
|---|-------------|-------------|-------------|
| H | 4.71042800  | 3.29338900  | 1.12156300  |
| H | 4.97368500  | 3.35639500  | -0.63116400 |
| C | -3.46252200 | 1.03125800  | 2.19310100  |
| H | -2.52468600 | 0.91460500  | 2.75011100  |
| C | -4.61759400 | 0.56076300  | 3.10324400  |
| H | -4.49230800 | -0.48325100 | 3.41164600  |
| H | -4.65842900 | 1.17796500  | 4.00765600  |
| H | -5.58290800 | 0.64914600  | 2.59000700  |
| C | -3.60681600 | 2.51521600  | 1.82776000  |
| H | -3.53287600 | 3.12441500  | 2.73506300  |
| H | -2.82194200 | 2.83341200  | 1.13438300  |
| H | -4.58118800 | 2.73137200  | 1.37256500  |

TFA

|   |             |             |             |
|---|-------------|-------------|-------------|
| C | -0.60094700 | -0.00076000 | -0.00019600 |
| C | 0.93423300  | 0.16007000  | -0.00057500 |
| O | 1.49777700  | 1.22253700  | -0.00032900 |
| O | 1.52071400  | -1.04590600 | -0.00027800 |
| F | -1.18853800 | 1.19603200  | -0.00239000 |
| F | -0.99710400 | -0.68234900 | -1.08848100 |
| F | -0.99584800 | -0.67741500 | 1.09183400  |
| H | 2.48575300  | -0.89531000 | 0.00081100  |

TFAA

|   |             |             |             |
|---|-------------|-------------|-------------|
| C | 2.34188300  | -0.32485100 | -0.04293700 |
| C | 1.19488800  | 0.68985100  | 0.16595300  |
| O | 1.34035600  | 1.83536100  | 0.45434500  |
| F | 2.26479600  | -0.85605000 | -1.27267500 |
| F | 3.51543700  | 0.28737200  | 0.09770300  |
| F | 2.24785400  | -1.31310600 | 0.85966100  |
| O | 0.00000000  | 0.01578900  | 0.00000700  |
| C | -1.19488600 | 0.68985000  | -0.16595400 |
| O | -1.34035300 | 1.83535900  | -0.45434600 |
| C | -2.34188300 | -0.32485000 | 0.04293600  |
| F | -3.51543600 | 0.28737200  | -0.09771700 |
| F | -2.24785000 | -1.31311300 | -0.85965300 |
| F | -2.26480400 | -0.85603900 | 1.27267800  |

N-methyl-benzanilide

|   |            |             |             |
|---|------------|-------------|-------------|
| C | 4.65882900 | -0.29208100 | -0.17756300 |
| C | 4.19638700 | 0.92197700  | 0.33765200  |
| C | 2.82913900 | 1.18825700  | 0.37781800  |
| C | 1.90615000 | 0.22981600  | -0.06405200 |
| C | 2.37722400 | -0.98205600 | -0.58808900 |

|   |             |             |             |
|---|-------------|-------------|-------------|
| C | 3.74767600  | -1.23830200 | -0.65057300 |
| H | 5.72552400  | -0.49552300 | -0.21889000 |
| H | 4.90250700  | 1.66568100  | 0.69687200  |
| H | 1.67420900  | -1.71676400 | -0.96994300 |
| H | 4.10282400  | -2.17479200 | -1.07215900 |
| C | 0.44964400  | 0.62232600  | -0.09460800 |
| O | 0.14398700  | 1.72513000  | -0.53494800 |
| N | -0.48703700 | -0.29920300 | 0.35919400  |
| C | -0.10605700 | -1.45841900 | 1.17567200  |
| H | -0.84615000 | -1.58453500 | 1.97090300  |
| H | -0.05573700 | -2.39064800 | 0.59982900  |
| H | 0.86875300  | -1.28666200 | 1.63054000  |
| C | -1.89049600 | -0.11885000 | 0.12725800  |
| C | -2.67937300 | -1.25497200 | -0.11398400 |
| C | -2.50743700 | 1.14175700  | 0.16641300  |
| C | -4.05427100 | -1.13634200 | -0.31386800 |
| H | -2.21895500 | -2.23667400 | -0.15921100 |
| C | -3.88264100 | 1.24827100  | -0.04206200 |
| H | -1.91125700 | 2.02436300  | 0.34416100  |
| C | -4.66481400 | 0.11741900  | -0.28135800 |
| H | -4.64431900 | -2.02943800 | -0.50203300 |
| H | -4.34459100 | 2.23151300  | -0.00885300 |
| H | -5.73551100 | 0.21192900  | -0.43954600 |
| H | 2.46029400  | 2.14213200  | 0.74163300  |

CF3COCl

|    |             |             |             |
|----|-------------|-------------|-------------|
| C  | 0.86758300  | -0.14622100 | -0.00001600 |
| C  | -0.46969200 | 0.64129800  | -0.00009200 |
| O  | -0.53755600 | 1.82574700  | 0.00005800  |
| F  | 1.88649200  | 0.71220600  | -0.00094900 |
| F  | 0.94324500  | -0.92016600 | 1.09017100  |
| F  | 0.94273400  | -0.92188800 | -1.08888700 |
| Cl | -1.88465500 | -0.43575300 | -0.00016700 |

HCl

|    |            |            |             |
|----|------------|------------|-------------|
| Cl | 0.00000000 | 0.00000000 | 0.07163900  |
| H  | 0.00000000 | 0.00000000 | -1.21785500 |

1

|   |            |            |             |
|---|------------|------------|-------------|
| C | 5.04388800 | 0.01575600 | -2.60500100 |
| C | 4.43599000 | 1.18313600 | -3.07304000 |
| C | 3.49369300 | 1.84556300 | -2.28517100 |
| C | 3.17144800 | 1.33242100 | -1.02777900 |
| C | 3.77764100 | 0.17131000 | -0.54714300 |

|    |             |             |             |
|----|-------------|-------------|-------------|
| C  | 4.71135300  | -0.48936700 | -1.34621200 |
| H  | 5.77207100  | -0.50149300 | -3.22339100 |
| H  | 4.68766200  | 1.57516900  | -4.05431900 |
| H  | 3.00327800  | 2.74546600  | -2.64598200 |
| H  | 3.50289000  | -0.21570700 | 0.42711900  |
| H  | 5.16949800  | -1.40373700 | -0.98125100 |
| N  | 2.22583900  | 2.04001700  | -0.18691900 |
| C  | 0.96486300  | 1.59032900  | -0.08013700 |
| O  | 0.59692800  | 0.65086100  | -0.84767600 |
| Pd | -0.95858100 | -0.59828100 | -0.38866400 |
| C  | -3.36967000 | -0.63003600 | -0.72154300 |
| O  | -2.78438700 | -1.61532200 | -0.18055700 |
| O  | -2.70793600 | 0.38766400  | -1.08450100 |
| C  | 1.21440400  | -1.72294100 | 1.15422200  |
| O  | 0.32177800  | -1.99143800 | 0.26537600  |
| C  | 2.12343600  | -2.94411600 | 1.46931000  |
| C  | -4.88240300 | -0.68286400 | -0.98066600 |
| O  | 1.45620600  | -0.67256500 | 1.73705100  |
| F  | -5.48024100 | -1.54474300 | -0.15225300 |
| F  | -5.10454200 | -1.07739700 | -2.24733000 |
| F  | -5.42603400 | 0.53135700  | -0.81309200 |
| F  | 2.24347400  | -3.10246100 | 2.79769300  |
| F  | 1.68489700  | -4.09493400 | 0.94687800  |
| F  | 3.36377400  | -2.70906900 | 0.97099400  |
| C  | 2.75101800  | 3.21968700  | 0.51033600  |
| H  | 3.47604400  | 2.91213200  | 1.27129200  |
| H  | 3.25725600  | 3.86408400  | -0.21398500 |
| H  | 1.94151100  | 3.77307000  | 0.98256500  |
| C  | 0.00846600  | 2.23988800  | 0.86677400  |
| C  | -1.12100700 | 2.88197300  | 0.33864100  |
| C  | 0.20074600  | 2.18048400  | 2.25486300  |
| C  | -2.04138900 | 3.48325200  | 1.19697500  |
| H  | -1.27978900 | 2.90281900  | -0.73495800 |
| C  | -0.73213400 | 2.77293300  | 3.10500400  |
| H  | 1.04819600  | 1.63578200  | 2.65559500  |
| C  | -1.84772100 | 3.43000000  | 2.57882900  |
| H  | -2.91230500 | 3.98426300  | 0.78475200  |
| H  | -0.59095200 | 2.71388400  | 4.18037200  |
| H  | -2.56992500 | 3.89225100  | 3.24607800  |

2

|   |            |             |             |
|---|------------|-------------|-------------|
| C | 5.82766500 | -1.09471500 | -2.34942100 |
| C | 5.47014900 | 0.09792000  | -2.98246300 |
| C | 4.75864600 | 1.07423300  | -2.28395400 |

|   |             |             |             |
|---|-------------|-------------|-------------|
| C | 4.41209100  | 0.84965400  | -0.95034600 |
| C | 4.76901800  | -0.33665300 | -0.30718500 |
| C | 5.47343000  | -1.31066900 | -1.01587100 |
| H | 6.37708900  | -1.85575000 | -2.89673100 |
| H | 5.73730900  | 0.26704000  | -4.02183000 |
| H | 4.46229100  | 1.99919200  | -2.77096600 |
| H | 4.47642900  | -0.49739500 | 0.72415900  |
| H | 5.73689300  | -2.24081900 | -0.52080600 |
| N | 3.71416600  | 1.88095300  | -0.21113500 |
| C | 2.38721600  | 1.76693900  | -0.00194700 |
| O | 1.77554200  | 0.83413100  | -0.59443800 |
| C | 1.95549900  | -1.27020400 | 1.80454200  |
| O | 0.96470700  | -1.46999000 | 1.01570600  |
| C | 2.55659300  | -2.59935300 | 2.34367900  |
| O | 2.50552100  | -0.23121800 | 2.15540100  |
| F | 2.79360400  | -2.51608600 | 3.66305300  |
| F | 1.77345300  | -3.67628000 | 2.13532500  |
| F | 3.74152000  | -2.83698800 | 1.72866600  |
| C | 4.54200100  | 2.99385500  | 0.26426900  |
| H | 5.22600200  | 2.64799800  | 1.04700300  |
| H | 5.13443200  | 3.38012000  | -0.57053600 |
| H | 3.91474500  | 3.79063000  | 0.65952100  |
| C | 1.68334000  | 2.77270300  | 0.85265600  |
| C | 0.73030100  | 3.61300100  | 0.26105500  |
| C | 1.94952400  | 2.86654400  | 2.22693000  |
| C | 0.05992900  | 4.55555900  | 1.04073900  |
| H | 0.49254900  | 3.50974800  | -0.79028500 |
| C | 1.26565800  | 3.80458500  | 2.99912700  |
| H | 2.65346900  | 2.17982400  | 2.68316600  |
| C | 0.32659000  | 4.65394300  | 2.40739600  |
| H | -0.68161600 | 5.19925100  | 0.57657000  |
| H | 1.46188600  | 3.86656500  | 4.06593600  |
| H | -0.20285800 | 5.38417500  | 3.01364700  |
| C | -5.82693300 | 1.09407600  | 2.35080900  |
| C | -5.46919500 | -0.09867300 | 2.98350600  |
| C | -4.75786300 | -1.07482100 | 2.28459200  |
| C | -4.41169600 | -0.84996300 | 0.95092900  |
| C | -4.76884800 | 0.33646500  | 0.30811100  |
| C | -5.47309000 | 1.31031200  | 1.01719900  |
| H | -6.37622500 | 1.85498200  | 2.89843200  |
| H | -5.73605100 | -0.26801300 | 4.02291500  |
| H | -4.46134500 | -1.99987400 | 2.77132600  |
| H | -4.47655000 | 0.49743600  | -0.72328000 |
| H | -5.73673000 | 2.24055300  | 0.52240000  |

|    |             |             |             |
|----|-------------|-------------|-------------|
| N  | -3.71395100 | -1.88110100 | 0.21132400  |
| C  | -2.38707300 | -1.76695100 | 0.00170900  |
| O  | -1.77528300 | -0.83419000 | 0.59412900  |
| Pd | 0.00008500  | -0.00002000 | -0.00022600 |
| C  | -1.95581100 | 1.27033300  | -1.80452100 |
| O  | -0.96452800 | 1.46989800  | -1.01624800 |
| C  | -2.55695000 | 2.59960200  | -2.34332600 |
| O  | -2.50623200 | 0.23147800  | -2.15513800 |
| F  | -2.79407400 | 2.51659000  | -3.66270100 |
| F  | -1.77380100 | 3.67650400  | -2.13483900 |
| F  | -3.74181500 | 2.83711000  | -1.72816100 |
| C  | -4.54189000 | -2.99391000 | -0.26410800 |
| H  | -5.22596200 | -2.64795700 | -1.04674100 |
| H  | -5.13424700 | -3.38022000 | 0.57072600  |
| H  | -3.91471900 | -3.79068500 | -0.65949600 |
| C  | -1.68341800 | -2.77254800 | -0.85328700 |
| C  | -0.73020900 | -3.61296400 | -0.26211700 |
| C  | -1.95002300 | -2.86615000 | -2.22749100 |
| C  | -0.06011100 | -4.55541200 | -1.04217300 |
| H  | -0.49211500 | -3.50988900 | 0.78916600  |
| C  | -1.26641400 | -3.80407100 | -3.00006300 |
| H  | -2.65410600 | -2.17934800 | -2.68339100 |
| C  | -0.32719100 | -4.65355800 | -2.40876700 |
| H  | 0.68153700  | -5.19923400 | -0.57834500 |
| H  | -1.46297300 | -3.86586000 | -4.06682200 |
| H  | 0.20204600  | -5.38370700 | -3.01530100 |

3

|   |             |             |             |
|---|-------------|-------------|-------------|
| C | -2.18337500 | -1.29161100 | 1.28487700  |
| C | -1.16444200 | -2.29632300 | 1.30431100  |
| C | -0.66738400 | -2.84363100 | 0.09370000  |
| C | -1.18833600 | -2.33095300 | -1.13150800 |
| C | -2.20985800 | -1.33710500 | -1.12952100 |
| C | -2.77599200 | -0.82816800 | 0.07730500  |
| H | -2.47222400 | -0.82743100 | 2.22345400  |
| H | -0.71449600 | -2.58330600 | 2.24834700  |
| H | -0.75271800 | -2.64670700 | -2.07320000 |
| H | -2.50932600 | -0.90819300 | -2.07941300 |
| C | -3.89113400 | 0.20464400  | 0.10792400  |
| H | -3.73979500 | 0.79761600  | 1.01977100  |
| C | -5.25329600 | -0.51093800 | 0.23088400  |
| H | -5.29274500 | -1.15863600 | 1.11378500  |
| H | -6.06099800 | 0.22463200  | 0.31302800  |
| H | -5.45067400 | -1.13077500 | -0.65214600 |

|    |             |             |             |
|----|-------------|-------------|-------------|
| C  | -3.87787700 | 1.17200800  | -1.08585900 |
| H  | -4.62014900 | 1.96116700  | -0.92649200 |
| H  | -2.89806300 | 1.64166300  | -1.21417100 |
| H  | -4.14402800 | 0.66616900  | -2.02211300 |
| C  | 0.50367800  | -3.78706400 | 0.08298000  |
| H  | 1.40520600  | -3.24415400 | -0.22542700 |
| H  | 0.68169500  | -4.20945300 | 1.07538400  |
| H  | 0.33149700  | -4.60745300 | -0.62163300 |
| Ru | -0.53100600 | -0.57323100 | 0.04807100  |
| O  | 1.50752600  | -0.85745500 | -0.08696800 |
| C  | 2.49107600  | -0.01498900 | -0.13338400 |
| O  | 2.49591300  | 1.20395800  | -0.15405100 |
| C  | 3.84303100  | -0.78134700 | -0.11941100 |
| F  | 4.09575800  | -1.24549900 | 1.12511900  |
| F  | 4.86153200  | 0.00354700  | -0.48519300 |
| F  | 3.82006200  | -1.84860600 | -0.95066200 |
| O  | -0.12376800 | 1.21657500  | 1.18971000  |
| C  | -0.00897800 | 1.86120400  | 0.10756200  |
| O  | -0.31356800 | 1.30586300  | -0.98983200 |
| C  | 0.37075900  | 3.34545000  | 0.13300500  |
| F  | -0.77496700 | 4.06152200  | 0.26670200  |
| F  | 0.96281100  | 3.72137100  | -1.00134300 |
| F  | 1.16202900  | 3.63305000  | 1.16733800  |

TS3-aTS

|   |             |             |             |
|---|-------------|-------------|-------------|
| C | -1.08808500 | -3.45797200 | -2.82643300 |
| C | -1.32095700 | -2.10074900 | -2.59684000 |
| C | -0.38388500 | -1.33509700 | -1.89335800 |
| C | 0.80506700  | -1.93222600 | -1.43255600 |
| C | 1.03532900  | -3.29335400 | -1.66518700 |
| C | 0.08777100  | -4.05131600 | -2.35841000 |
| H | -1.81264800 | -4.05027800 | -3.37706300 |
| H | -2.21556900 | -1.62111800 | -2.98224900 |
| H | -0.54677100 | -0.25636800 | -1.83272800 |
| H | 1.93933500  | -3.76654600 | -1.29278600 |
| H | 0.27082400  | -5.10736100 | -2.53318100 |
| C | 1.70215900  | -1.12548500 | -0.54695100 |
| O | 1.19427200  | -0.61655000 | 0.49788200  |
| N | 3.00054900  | -0.95097500 | -0.81151300 |
| C | 3.66937200  | -1.41620600 | -2.03852600 |
| H | 4.20823500  | -0.57220700 | -2.47605500 |
| H | 4.38748000  | -2.20816700 | -1.80564400 |
| H | 2.93814800  | -1.78670700 | -2.75514800 |
| C | 3.81911300  | -0.16595100 | 0.09674600  |

|    |             |             |             |
|----|-------------|-------------|-------------|
| C  | 4.82728900  | -0.80562800 | 0.81930700  |
| C  | 3.62440900  | 1.21417300  | 0.19063800  |
| C  | 5.65572100  | -0.05058400 | 1.65151400  |
| H  | 4.96201300  | -1.88045100 | 0.73581300  |
| C  | 4.45686400  | 1.95741500  | 1.02795100  |
| H  | 2.83082800  | 1.69797200  | -0.36974800 |
| C  | 5.47152000  | 1.32950500  | 1.75507900  |
| H  | 6.44298400  | -0.54192000 | 2.21526800  |
| H  | 4.31299500  | 3.03075000  | 1.10673600  |
| H  | 6.11914700  | 1.91582500  | 2.40006500  |
| C  | -2.31118400 | 0.63863600  | 2.06849100  |
| C  | -1.24273100 | -0.00944600 | 2.75845300  |
| C  | -0.99854500 | -1.41733700 | 2.59481700  |
| C  | -1.78042200 | -2.10918700 | 1.64115100  |
| C  | -2.76431400 | -1.41445500 | 0.88022100  |
| C  | -3.11279300 | -0.04878300 | 1.12105400  |
| H  | -2.42936900 | 1.71194100  | 2.18276600  |
| H  | -0.59085000 | 0.57457800  | 3.40040500  |
| H  | -1.55418200 | -3.14312300 | 1.40534300  |
| H  | -3.24586000 | -1.94215700 | 0.06480200  |
| C  | -4.24984900 | 0.66490200  | 0.40910600  |
| H  | -3.95604900 | 1.71828900  | 0.32363700  |
| C  | -5.50805800 | 0.58928500  | 1.30449400  |
| H  | -5.32735900 | 1.00709600  | 2.30096200  |
| H  | -6.32256700 | 1.15686700  | 0.84338800  |
| H  | -5.84560900 | -0.44678500 | 1.42536000  |
| C  | -4.53910600 | 0.14755600  | -1.00615400 |
| H  | -5.32813200 | 0.75741000  | -1.45664000 |
| H  | -3.65295600 | 0.22894200  | -1.64114400 |
| H  | -4.90107800 | -0.88801300 | -1.00093200 |
| C  | 0.12600600  | -2.08076800 | 3.33593600  |
| H  | 1.01426200  | -1.44246300 | 3.35723800  |
| H  | -0.18202300 | -2.26392400 | 4.37319400  |
| H  | 0.39353600  | -3.03980200 | 2.88585600  |
| Ru | -0.89529100 | -0.27661100 | 0.65734000  |
| O  | -0.25361700 | 1.58200000  | 0.02942700  |
| C  | -0.77379600 | 2.13585200  | -1.01723800 |
| O  | -1.62126400 | 1.67119500  | -1.77066500 |
| C  | -0.14915500 | 3.52884200  | -1.28451500 |
| F  | -0.29602500 | 4.32975800  | -0.21461300 |
| F  | -0.70524900 | 4.11853700  | -2.34156200 |
| F  | 1.17667700  | 3.38976500  | -1.52446500 |

TS4-aTS

|   |             |             |             |
|---|-------------|-------------|-------------|
| C | -0.69797200 | 4.03119300  | 2.17967600  |
| C | 0.43186500  | 4.41007500  | 1.44425000  |
| C | 1.37245600  | 3.45414400  | 1.05832700  |
| C | 1.17567700  | 2.11396800  | 1.40710200  |
| C | 0.04654700  | 1.72133500  | 2.13617300  |
| C | -0.88984600 | 2.69201000  | 2.52019100  |
| H | -1.41324000 | 4.78344400  | 2.49958500  |
| H | 0.59045400  | 5.45355200  | 1.18789800  |
| H | 2.25994600  | 3.74227600  | 0.50252600  |
| H | -0.08631700 | 0.68541400  | 2.43427900  |
| H | -1.75339800 | 2.39241900  | 3.10705700  |
| N | 2.20336700  | 1.14885500  | 1.07877100  |
| C | 2.19962400  | 0.54856300  | -0.12805600 |
| O | 1.21029700  | 0.67158900  | -0.91484100 |
| C | 3.18835900  | 0.88814000  | 2.14493500  |
| H | 3.78731800  | 0.01507600  | 1.89328700  |
| H | 3.84095400  | 1.75539100  | 2.28597300  |
| H | 2.64846400  | 0.69976900  | 3.07644700  |
| C | 3.36346500  | -0.24071500 | -0.60205100 |
| C | 3.12224200  | -1.50868200 | -1.15720400 |
| C | 4.66706100  | 0.28199400  | -0.58052800 |
| C | 4.18656000  | -2.25478800 | -1.65837800 |
| H | 2.11311600  | -1.90747400 | -1.15786800 |
| C | 5.72063700  | -0.46006100 | -1.11031400 |
| H | 4.85316100  | 1.27386200  | -0.17810800 |
| C | 5.48203300  | -1.73035600 | -1.64225200 |
| H | 4.00490900  | -3.24460500 | -2.06601100 |
| H | 6.72516400  | -0.04812600 | -1.10919800 |
| H | 6.30666400  | -2.31072500 | -2.04556700 |
| C | -2.14973200 | -0.33042700 | -2.09395800 |
| C | -1.39113100 | 0.76650800  | -2.59643100 |
| C | -1.46731500 | 2.06898800  | -1.99303200 |
| C | -2.22661200 | 2.17162300  | -0.81222900 |
| C | -2.96019900 | 1.05273500  | -0.28874100 |
| C | -3.00147000 | -0.19797600 | -0.94790800 |
| H | -2.01134000 | -1.31055100 | -2.54002900 |
| H | -0.70127500 | 0.59932000  | -3.41792400 |
| H | -2.18745300 | 3.08722000  | -0.23198100 |
| H | -3.45527500 | 1.16288400  | 0.66857200  |
| C | -3.80642800 | -1.39300800 | -0.46495600 |
| H | -3.14245800 | -2.26657800 | -0.52033600 |
| C | -4.97550700 | -1.62527800 | -1.45076200 |
| H | -4.62719500 | -1.76821300 | -2.47956500 |
| H | -5.52971600 | -2.52224600 | -1.15740400 |



|    |             |             |             |
|----|-------------|-------------|-------------|
| H  | -5.67216000 | -0.77919700 | -1.44078600 |
| C  | -4.31628500 | -1.27091000 | 0.97684200  |
| H  | -4.82806900 | -2.19646200 | 1.25725400  |
| H  | -3.49719800 | -1.11540900 | 1.68499100  |
| H  | -5.04467500 | -0.45740700 | 1.08095600  |
| C  | -0.65598800 | 3.21323600  | -2.53023600 |
| H  | 0.30892900  | 2.86670300  | -2.91172600 |
| H  | -1.19435900 | 3.68970200  | -3.35918000 |
| H  | -0.47711800 | 3.96825200  | -1.76065300 |
| Ru | -0.84908700 | 0.41675400  | -0.55074200 |
| O  | -0.19027100 | -1.51148800 | -0.09900100 |
| C  | -0.50681800 | -1.90755500 | 1.08661900  |
| O  | -1.02890400 | -1.23058900 | 1.96985900  |
| C  | -0.22146600 | -3.41195500 | 1.30436000  |
| F  | -1.13507900 | -4.12881100 | 0.61376200  |
| F  | -0.30505900 | -3.74486100 | 2.59251100  |
| F  | 1.00135100  | -3.74414600 | 0.85172800  |

TS3-int

|   |             |             |             |
|---|-------------|-------------|-------------|
| C | 1.15672600  | -3.69241400 | 2.46954500  |
| C | 1.23718700  | -2.30729400 | 2.60368900  |
| C | 0.30928600  | -1.47583800 | 1.95579200  |
| C | -0.71617800 | -2.05366400 | 1.17551600  |
| C | -0.79746400 | -3.44716800 | 1.04820200  |
| C | 0.13561800  | -4.25906400 | 1.69617900  |
| H | 1.86684200  | -4.33382800 | 2.98291900  |
| H | 1.99734800  | -1.86205400 | 3.23926700  |
| H | 0.25538600  | -0.41270800 | 2.18298300  |
| H | -1.58142300 | -3.89443200 | 0.44363000  |
| H | 0.06204200  | -5.33882000 | 1.60347100  |
| C | -1.59033300 | -1.15579300 | 0.34710700  |
| O | -1.00898700 | -0.47490800 | -0.55327000 |
| N | -2.91284800 | -1.11678700 | 0.49035000  |
| C | -3.63891500 | -1.74762100 | 1.60416600  |
| H | -4.13705600 | -0.96548300 | 2.18375000  |
| H | -4.39455800 | -2.43405700 | 1.21229100  |
| H | -2.95165600 | -2.29005000 | 2.25195900  |
| C | -3.70564900 | -0.26383700 | -0.37995300 |
| C | -4.48348700 | -0.85624700 | -1.37558600 |
| C | -3.71609000 | 1.11686200  | -0.17394600 |
| C | -5.28563400 | -0.04913400 | -2.18411900 |
| H | -4.46211000 | -1.93352300 | -1.51650400 |
| C | -4.51889000 | 1.91340800  | -0.99153000 |
| H | -3.09914800 | 1.55611500  | 0.60253000  |

|    |             |             |             |
|----|-------------|-------------|-------------|
| C  | -5.30303000 | 1.33410500  | -1.99224400 |
| H  | -5.89551400 | -0.50193700 | -2.96007400 |
| H  | -4.52937700 | 2.98888500  | -0.84245600 |
| H  | -5.92882400 | 1.96001200  | -2.62148600 |
| C  | 2.15600400  | 0.48184300  | -2.05372700 |
| C  | 1.44361700  | -0.66938500 | -2.48883700 |
| C  | 1.67168300  | -1.95818700 | -1.90732000 |
| C  | 2.56332000  | -2.00254900 | -0.81315000 |
| C  | 3.29303200  | -0.84543800 | -0.37461400 |
| C  | 3.14173100  | 0.40642000  | -1.00851300 |
| H  | 1.90136000  | 1.45003300  | -2.47262100 |
| H  | 0.65688300  | -0.55137900 | -3.22803800 |
| H  | 2.65768400  | -2.92307500 | -0.24611300 |
| H  | 3.92253200  | -0.93106700 | 0.50291800  |
| C  | 3.84785300  | 1.67393500  | -0.56820100 |
| H  | 3.09225000  | 2.46908600  | -0.59939900 |
| C  | 4.95314700  | 2.01089300  | -1.59581800 |
| H  | 4.55615200  | 2.09901400  | -2.61305300 |
| H  | 5.41836000  | 2.96640600  | -1.33439300 |
| H  | 5.73522500  | 1.24309700  | -1.60029800 |
| C  | 4.40874900  | 1.62092400  | 0.85825500  |
| H  | 4.82225300  | 2.59913100  | 1.12093300  |
| H  | 3.62852600  | 1.38493000  | 1.58968400  |
| H  | 5.22153900  | 0.89117000  | 0.95646900  |
| C  | 0.92430600  | -3.17146900 | -2.38656900 |
| H  | -0.08800900 | -2.91228800 | -2.71081600 |
| H  | 1.44646100  | -3.61176800 | -3.24522400 |
| H  | 0.85985400  | -3.93403900 | -1.60614100 |
| Ru | 1.10944400  | -0.36551800 | -0.36364100 |
| O  | 0.76470900  | 1.52290300  | 0.39088000  |
| C  | -0.18536800 | 1.93250800  | 1.16571000  |
| O  | -0.95008500 | 1.27606800  | 1.86336300  |
| C  | -0.35358600 | 3.47580600  | 1.15500600  |
| F  | 0.66637900  | 4.10864500  | 0.55482400  |
| F  | -0.46735600 | 3.94338300  | 2.40361700  |
| F  | -1.48675100 | 3.77695200  | 0.48306300  |

TS4-int

|   |             |             |            |
|---|-------------|-------------|------------|
| C | 1.15050800  | -3.64448600 | 2.26721300 |
| C | -0.01960300 | -4.20952500 | 1.74017800 |
| C | -1.07242200 | -3.39659000 | 1.32055200 |
| C | -0.95606500 | -2.00580200 | 1.42738200 |
| C | 0.21851000  | -1.42239500 | 1.93497100 |
| C | 1.26768800  | -2.26102600 | 2.36083100 |

|   |             |             |             |
|---|-------------|-------------|-------------|
| H | 1.95157500  | -4.28753000 | 2.61962100  |
| H | -0.11697900 | -5.28914700 | 1.67111300  |
| H | -1.98660100 | -3.83197800 | 0.92837900  |
| H | 0.27879600  | -0.35729000 | 2.15256500  |
| H | 2.15422900  | -1.80699800 | 2.79362600  |
| N | -2.10351900 | -1.18545200 | 1.11767400  |
| C | -2.20903400 | -0.61278800 | -0.09909200 |
| O | -1.25674800 | -0.66899400 | -0.93253400 |
| C | -3.05620100 | -0.99165100 | 2.22703800  |
| H | -3.76337100 | -0.20527700 | 1.97068400  |
| H | -3.59856000 | -1.91897700 | 2.43584100  |
| H | -2.49901400 | -0.69806800 | 3.12070200  |
| C | -3.45023900 | 0.08151300  | -0.52108800 |
| C | -3.32945700 | 1.37685700  | -1.05063500 |
| C | -4.70514000 | -0.54605900 | -0.46736300 |
| C | -4.46686800 | 2.04492700  | -1.49893400 |
| H | -2.35640400 | 1.85685500  | -1.06930700 |
| C | -5.83252400 | 0.12030000  | -0.94356800 |
| H | -4.79609200 | -1.55733100 | -0.08045500 |
| C | -5.71452000 | 1.41660400  | -1.45286000 |
| H | -4.37965200 | 3.05488500  | -1.88774300 |
| H | -6.80067000 | -0.37043400 | -0.91811000 |
| H | -6.59659700 | 1.93689900  | -1.81439500 |
| C | 1.96324000  | 0.36865300  | -2.07899000 |
| C | 1.25431600  | -0.74732100 | -2.59464600 |
| C | 1.42812100  | -2.06451500 | -2.05059900 |
| C | 2.26803900  | -2.17175000 | -0.92363800 |
| C | 2.99449800  | -1.04502000 | -0.40706800 |
| C | 2.90140100  | 0.23283400  | -0.99695300 |
| H | 1.74659800  | 1.35712500  | -2.47146600 |
| H | 0.50507000  | -0.58557200 | -3.36354700 |
| H | 2.32514300  | -3.11712300 | -0.39539000 |
| H | 3.58900900  | -1.17564000 | 0.48851000  |
| C | 3.68027400  | 1.44751800  | -0.52458800 |
| H | 2.97811600  | 2.29153400  | -0.51205300 |
| C | 4.77236500  | 1.76034800  | -1.57564900 |
| H | 4.35256500  | 1.91655100  | -2.57540400 |
| H | 5.30406300  | 2.67307300  | -1.28942300 |
| H | 5.50421400  | 0.94671900  | -1.63532100 |
| C | 4.28711900  | 1.30608700  | 0.87696000  |
| H | 4.76933500  | 2.24742300  | 1.15715800  |
| H | 3.52122300  | 1.09120300  | 1.62758100  |
| H | 5.06022100  | 0.52843800  | 0.90743200  |
| C | 0.66117000  | -3.23522200 | -2.59884300 |

|    |             |             |             |
|----|-------------|-------------|-------------|
| H  | -0.34118400 | -2.93609700 | -2.91904100 |
| H  | 1.18431400  | -3.64468700 | -3.47207000 |
| H  | 0.56820000  | -4.03273400 | -1.85684500 |
| Ru | 0.80238700  | -0.53380600 | -0.48616600 |
| O  | 0.10868100  | 1.32705000  | 0.14047400  |
| C  | 0.53339200  | 1.97556400  | 1.17662900  |
| O  | 1.17472500  | 1.55852200  | 2.13240000  |
| C  | 0.17664700  | 3.48079000  | 1.07376500  |
| F  | 0.98969700  | 4.05110200  | 0.15185300  |
| F  | 0.34792200  | 4.11149800  | 2.23428200  |
| F  | -1.09567300 | 3.66185400  | 0.67010700  |

TS3

|   |             |             |             |
|---|-------------|-------------|-------------|
| C | 0.90287700  | -3.08491900 | 3.11220600  |
| C | 1.32236600  | -1.96024100 | 2.39751600  |
| C | 0.45303200  | -1.28038700 | 1.52436800  |
| C | -0.89283800 | -1.74188600 | 1.44702900  |
| C | -1.30841200 | -2.88213100 | 2.13962600  |
| C | -0.40288300 | -3.55769000 | 2.96440800  |
| H | 1.59214400  | -3.59668800 | 3.77781200  |
| H | 2.33746300  | -1.59465900 | 2.53169200  |
| H | 0.50633200  | 0.05713100  | 1.75616700  |
| H | -2.31500100 | -3.27096300 | 2.02758000  |
| H | -0.72408100 | -4.44735100 | 3.49774500  |
| C | -1.72060600 | -0.97560400 | 0.47761400  |
| O | -1.10567700 | -0.46753600 | -0.51523300 |
| N | -3.04037800 | -0.76916200 | 0.59994800  |
| C | -3.84190500 | -1.10222100 | 1.78944800  |
| H | -4.53715900 | -0.27853200 | 1.96364400  |
| H | -4.42145000 | -2.01852800 | 1.63417400  |
| H | -3.20245300 | -1.21407800 | 2.66449500  |
| C | -3.74259500 | -0.05050500 | -0.44940800 |
| C | -4.54077100 | -0.76724600 | -1.34161100 |
| C | -3.66102200 | 1.34228400  | -0.51369700 |
| C | -5.26716400 | -0.07865000 | -2.31537000 |
| H | -4.59385800 | -1.85026700 | -1.27379900 |
| C | -4.38812300 | 2.02069500  | -1.49213000 |
| H | -3.03360800 | 1.88722400  | 0.18501400  |
| C | -5.19143200 | 1.31333300  | -2.39040000 |
| H | -5.89227100 | -0.63072900 | -3.01075400 |
| H | -4.32887700 | 3.10341700  | -1.54920900 |
| H | -5.75925600 | 1.84735900  | -3.14641800 |
| C | 2.16402300  | 0.13228100  | -2.32433500 |
| C | 1.26688400  | -0.89208200 | -2.66019700 |

|     |             |             |             |
|-----|-------------|-------------|-------------|
| C   | 1.26802200  | -2.14735900 | -1.95081000 |
| C   | 2.20249600  | -2.30089000 | -0.90434200 |
| C   | 3.10349600  | -1.24421500 | -0.54646500 |
| C   | 3.09900700  | -0.01209100 | -1.23794400 |
| H   | 2.07690100  | 1.09501900  | -2.81800300 |
| H   | 0.50997700  | -0.71150300 | -3.41703700 |
| H   | 2.19309300  | -3.20910600 | -0.31127600 |
| H   | 3.75735200  | -1.38142700 | 0.30611800  |
| C   | 4.01360600  | 1.15035100  | -0.89057300 |
| H   | 3.42132300  | 2.06282800  | -1.03766100 |
| C   | 5.19196400  | 1.18217900  | -1.89001800 |
| H   | 4.84669500  | 1.23773500  | -2.92808000 |
| H   | 5.81826500  | 2.05895000  | -1.69708800 |
| H   | 5.81825300  | 0.28857600  | -1.78723500 |
| C   | 4.51834000  | 1.14580000  | 0.55881000  |
| H   | 5.07666500  | 2.06642200  | 0.75374500  |
| H   | 3.69400900  | 1.09666100  | 1.27922200  |
| H   | 5.20149000  | 0.31049700  | 0.75311000  |
| C   | 0.29090400  | -3.23141300 | -2.31405000 |
| H   | -0.67981800 | -2.81003500 | -2.59159900 |
| H   | 0.66781800  | -3.79825200 | -3.17466700 |
| H   | 0.14547700  | -3.93090900 | -1.48638900 |
| Ru  | 1.00761800  | -0.46361700 | -0.46878400 |
| O   | 0.68745700  | 1.59931600  | -0.03097500 |
| C   | 0.39683400  | 1.98198600  | 1.12832100  |
| O   | 0.30824900  | 1.25504800  | 2.15725300  |
| C   | 0.05050600  | 3.47650300  | 1.31103100  |
| F   | 0.54793800  | 4.21428300  | 0.31636800  |
| F   | 0.51692400  | 3.93517700  | 2.47348400  |
| F   | -1.29462400 | 3.59549300  | 1.30604000  |
| TS4 |             |             |             |
| C   | 0.67270000  | -3.30269500 | 2.93329100  |
| C   | -0.70006800 | -3.51068400 | 3.09250400  |
| C   | -1.61095100 | -2.65890400 | 2.47070800  |
| C   | -1.15644400 | -1.60741400 | 1.66663200  |
| C   | 0.22712800  | -1.39626400 | 1.43205500  |
| C   | 1.11262400  | -2.26915600 | 2.11458300  |
| H   | 1.38668600  | -3.93820100 | 3.44864000  |
| H   | -1.06453800 | -4.32353000 | 3.71363000  |
| H   | -2.67505600 | -2.81753100 | 2.61318000  |
| H   | 0.54511300  | -0.09586100 | 1.76125400  |
| H   | 2.18151000  | -2.10062300 | 2.02184400  |
| N   | -2.15993300 | -0.70441700 | 1.16205300  |

|    |             |             |             |
|----|-------------|-------------|-------------|
| C  | -2.21737700 | -0.35901500 | -0.14591300 |
| O  | -1.26884800 | -0.58767900 | -0.94777400 |
| C  | -3.11089100 | -0.17119800 | 2.16217700  |
| H  | -3.56581300 | 0.74162000  | 1.78151000  |
| H  | -3.90177100 | -0.88679000 | 2.40205800  |
| H  | -2.55084100 | 0.05820800  | 3.07113400  |
| C  | -3.42902800 | 0.28789700  | -0.71469400 |
| C  | -3.25012400 | 1.38436500  | -1.57399600 |
| C  | -4.71882400 | -0.21957300 | -0.48899000 |
| C  | -4.35506100 | 1.98704700  | -2.17060600 |
| H  | -2.24886500 | 1.76337000  | -1.75225000 |
| C  | -5.81708600 | 0.37211200  | -1.10961600 |
| H  | -4.86162400 | -1.08999700 | 0.14443500  |
| C  | -5.63728700 | 1.48021900  | -1.94201300 |
| H  | -4.21665200 | 2.84754000  | -2.81810700 |
| H  | -6.81140300 | -0.03216600 | -0.94631600 |
| H  | -6.49644500 | 1.94544800  | -2.41618300 |
| C  | 2.00766700  | 0.06207900  | -2.35894100 |
| C  | 1.16958200  | -0.98323300 | -2.76647800 |
| C  | 1.17532000  | -2.25453900 | -2.08888600 |
| C  | 2.06684900  | -2.40827500 | -1.00542200 |
| C  | 2.92342200  | -1.33904100 | -0.58465600 |
| C  | 2.89845900  | -0.08553900 | -1.23565700 |
| H  | 1.91533000  | 1.03447600  | -2.83206600 |
| H  | 0.43839900  | -0.80710200 | -3.54921100 |
| H  | 2.06008500  | -3.33436700 | -0.44093700 |
| H  | 3.56072500  | -1.48145100 | 0.27902100  |
| C  | 3.75635100  | 1.09705200  | -0.81569300 |
| H  | 3.11751600  | 1.98651700  | -0.89163300 |
| C  | 4.91950300  | 1.26012000  | -1.82009900 |
| H  | 4.56104500  | 1.37133700  | -2.84911000 |
| H  | 5.50260300  | 2.15213400  | -1.57003000 |
| H  | 5.59199300  | 0.39529100  | -1.78636800 |
| C  | 4.28060100  | 1.02120900  | 0.62499000  |
| H  | 4.78596300  | 1.95797800  | 0.87791900  |
| H  | 3.47428500  | 0.87397900  | 1.35169400  |
| H  | 5.01366200  | 0.21581000  | 0.75177700  |
| C  | 0.24840400  | -3.35503600 | -2.52639200 |
| H  | -0.74601900 | -2.96206900 | -2.75852100 |
| H  | 0.64083000  | -3.83212300 | -3.43330600 |
| H  | 0.14882900  | -4.12429800 | -1.75618300 |
| Ru | 0.79030600  | -0.62715800 | -0.56567900 |
| O  | 0.43575400  | 1.42894900  | -0.01730700 |
| C  | 0.56432800  | 1.81653500  | 1.16905000  |

|   |             |            |            |
|---|-------------|------------|------------|
| O | 0.66465600  | 1.07703500 | 2.19027300 |
| C | 0.67803200  | 3.34353900 | 1.37698900 |
| F | 1.91269300  | 3.72356600 | 0.98983800 |
| F | 0.50121100  | 3.68351000 | 2.65185600 |
| F | -0.22267700 | 3.98316600 | 0.62125500 |

tri\_Pd(OAc)<sub>2</sub>

|    |             |             |             |
|----|-------------|-------------|-------------|
| Pd | 1.61508100  | 0.92607500  | -0.01063700 |
| C  | -0.06180400 | 2.60426100  | -1.87704500 |
| O  | 1.04306300  | 2.41870300  | -1.28785500 |
| O  | -1.17047300 | 2.03750200  | -1.63766000 |
| C  | -2.27679100 | -1.26108000 | 1.89219700  |
| O  | -1.54781200 | -2.11771700 | 1.31084200  |
| O  | -2.35771900 | -0.01908700 | 1.65045800  |
| C  | -3.18399200 | -1.78937100 | 2.98645000  |
| H  | -3.45042500 | -0.98878100 | 3.67891400  |
| H  | -4.10289000 | -2.16823500 | 2.52377000  |
| H  | -2.70064700 | -2.61478800 | 3.51312400  |
| C  | -0.06696100 | 3.64838100  | -2.97668900 |
| H  | 0.89297200  | 3.65373300  | -3.49714400 |
| H  | -0.88619600 | 3.46227800  | -3.67360100 |
| H  | -0.21637400 | 4.63426600  | -2.52102100 |
| Pd | -0.00137800 | -1.86134600 | -0.00019000 |
| C  | -2.26830100 | -1.34837800 | -1.84767700 |
| O  | -2.65299300 | -0.30004400 | -1.24903300 |
| O  | -1.22867100 | -2.03454400 | -1.61581500 |
| C  | 0.06542900  | 2.60373200  | 1.87744000  |
| O  | 1.17302800  | 2.03486200  | 1.63814400  |
| O  | -1.03965000 | 2.42052700  | 1.28788700  |
| C  | 0.07253800  | 3.64762800  | 2.97728000  |
| H  | -0.88894700 | 3.65807400  | 3.49473400  |
| H  | 0.88862700  | 3.45702500  | 3.67668800  |
| H  | 0.22896100  | 4.63274300  | 2.52228300  |
| C  | -3.15645100 | -1.82484800 | -2.98071100 |
| H  | -3.11492800 | -1.09396100 | -3.79533600 |
| H  | -2.83124200 | -2.80057800 | -3.34375000 |
| H  | -4.19318200 | -1.87436200 | -2.63540100 |
| Pd | -1.61369500 | 0.92869800  | 0.01071500  |
| C  | 2.26616900  | -1.35186200 | 1.84764700  |
| O  | 2.65264100  | -0.30415100 | 1.24904200  |
| O  | 1.22555600  | -2.03644500 | 1.61553300  |
| C  | 3.15312800  | -1.82951600 | 2.98111100  |
| H  | 3.10978700  | -1.09997000 | 3.79686100  |
| H  | 2.82802700  | -2.80599900 | 3.34223200  |

|   |            |             |             |
|---|------------|-------------|-------------|
| H | 4.19039200 | -1.87769400 | 2.63727400  |
| C | 2.27526300 | -1.26390900 | -1.89247000 |
| O | 2.35840500 | -0.02211100 | -1.65036800 |
| O | 1.54464200 | -2.11937000 | -1.31148500 |
| C | 3.18165900 | -1.79352200 | -2.98674800 |
| H | 4.09934900 | -2.17515200 | -2.52394700 |
| H | 2.69647400 | -2.61728200 | -3.51433700 |
| H | 3.45043300 | -0.99303600 | -3.67842000 |

4

|    |             |             |             |
|----|-------------|-------------|-------------|
| C  | -2.42474000 | 0.86239700  | 2.09521300  |
| C  | -1.27013000 | 1.50374100  | 2.64282100  |
| C  | -0.15583200 | 0.73506100  | 3.04262600  |
| C  | -0.23534300 | -0.69704100 | 2.92878600  |
| C  | -1.39040000 | -1.31729800 | 2.41512800  |
| C  | -2.53321700 | -0.55191600 | 1.99843800  |
| H  | -3.21245000 | 1.47524200  | 1.67302800  |
| H  | -1.20307700 | 2.58595900  | 2.62993600  |
| H  | 0.64508000  | -1.29522700 | 3.13741300  |
| H  | -1.37244800 | -2.38568500 | 2.23484500  |
| C  | -3.81795600 | -1.18653200 | 1.49241600  |
| H  | -4.22843600 | -0.50367700 | 0.74206800  |
| C  | -4.82373200 | -1.27232700 | 2.66182100  |
| H  | -5.01975000 | -0.28919100 | 3.10467200  |
| H  | -5.77664300 | -1.67900800 | 2.30533300  |
| H  | -4.45191300 | -1.93353900 | 3.45431600  |
| C  | -3.62648900 | -2.55672800 | 0.82707900  |
| H  | -4.57867400 | -2.88578300 | 0.39708000  |
| H  | -2.88317700 | -2.51515700 | 0.02823400  |
| H  | -3.32219800 | -3.32186000 | 1.55309800  |
| C  | 1.11003500  | 1.38462300  | 3.53024100  |
| H  | 1.21606600  | 2.39817100  | 3.13416600  |
| H  | 1.09749200  | 1.44240500  | 4.62653300  |
| H  | 1.98611900  | 0.80175600  | 3.23328100  |
| Ru | -0.70872800 | 0.17680800  | 0.93247500  |
| O  | -0.78147200 | -1.30888700 | -0.51903500 |
| C  | -0.22003800 | -1.31680000 | -1.67830000 |
| O  | 0.48832900  | -0.49488900 | -2.24224900 |
| C  | -0.48190400 | -2.67342100 | -2.39649500 |
| F  | 0.35860500  | -3.62084600 | -1.89759600 |
| F  | -0.25628100 | -2.59002700 | -3.71338700 |
| F  | -1.73982300 | -3.12550100 | -2.22066500 |
| O  | -1.51708900 | 2.80490600  | -2.35237100 |
| C  | -1.75836100 | 1.95765200  | -1.50552800 |



|   |             |             |             |
|---|-------------|-------------|-------------|
| O | -0.98703800 | 1.61814600  | -0.53089700 |
| C | -3.16135000 | 1.28547400  | -1.57221000 |
| F | -3.94327400 | 1.72329500  | -0.53644000 |
| F | -3.11042600 | -0.06228800 | -1.47025200 |
| F | -3.80599100 | 1.58188800  | -2.70217300 |
| C | 2.14101300  | 5.00722500  | -0.81215600 |
| C | 2.92689300  | 4.53929200  | 0.24566800  |
| C | 3.03253100  | 3.16826000  | 0.47768100  |
| C | 2.34206000  | 2.26329100  | -0.34484700 |
| C | 1.55738800  | 2.73164900  | -1.40269000 |
| C | 1.46119900  | 4.10526900  | -1.63188900 |
| H | 2.05636000  | 6.07590500  | -0.99159500 |
| H | 3.45697900  | 5.23890400  | 0.88663700  |
| H | 1.01414400  | 2.02993900  | -2.02149700 |
| H | 0.82274900  | 4.45597300  | -2.43576700 |
| C | 2.41145800  | 0.79727900  | -0.04358900 |
| O | 1.46313600  | 0.16094600  | 0.46419800  |
| N | 3.58745900  | 0.15225000  | -0.26162000 |
| C | 4.72654300  | 0.72542500  | -0.98695500 |
| H | 5.60659100  | 0.78564300  | -0.33694600 |
| H | 4.96648600  | 0.08334200  | -1.84055800 |
| H | 4.47874900  | 1.72173500  | -1.34775400 |
| C | 3.71438400  | -1.24216000 | 0.09402100  |
| C | 3.09674700  | -2.22269900 | -0.68484900 |
| C | 4.50102400  | -1.59672400 | 1.19253000  |
| C | 3.26016200  | -3.56721100 | -0.35058700 |
| H | 2.48421700  | -1.92611300 | -1.52871600 |
| C | 4.66898800  | -2.94494100 | 1.51548600  |
| H | 4.97582600  | -0.82125800 | 1.78813200  |
| C | 4.04764800  | -3.93027400 | 0.74500900  |
| H | 2.76228600  | -4.32536300 | -0.94688300 |
| H | 5.28296000  | -3.22275300 | 2.36793700  |
| H | 4.17621000  | -4.97899900 | 0.99871300  |
| H | 3.64856000  | 2.79947300  | 1.29494900  |

5

|   |            |             |             |
|---|------------|-------------|-------------|
| C | 2.80915700 | -0.67504500 | -1.72521100 |
| C | 1.80969400 | -1.51151100 | -2.28496000 |
| C | 1.18732000 | -2.53119900 | -1.49828100 |
| C | 1.57437300 | -2.64835900 | -0.14080400 |
| C | 2.58411700 | -1.79601800 | 0.40996000  |
| C | 3.25385700 | -0.81604000 | -0.37088600 |
| H | 3.19228400 | 0.15045400  | -2.31816800 |
| H | 1.46318200 | -1.32745000 | -3.29604900 |

|    |             |             |             |
|----|-------------|-------------|-------------|
| H  | 1.04091700  | -3.33173700 | 0.51104900  |
| H  | 2.77837700  | -1.85050400 | 1.47514300  |
| C  | 4.34443700  | 0.09413000  | 0.16887600  |
| H  | 4.20868500  | 1.06752000  | -0.32092400 |
| C  | 5.71918300  | -0.46556800 | -0.26175000 |
| H  | 5.79209600  | -0.57955000 | -1.34883900 |
| H  | 6.51400000  | 0.21514400  | 0.05939300  |
| H  | 5.90615600  | -1.44363800 | 0.19645600  |
| C  | 4.29015100  | 0.31687500  | 1.68734100  |
| H  | 5.04960900  | 1.05130400  | 1.97217300  |
| H  | 3.31839800  | 0.69742600  | 2.01837200  |
| H  | 4.51048900  | -0.60207700 | 2.24337300  |
| C  | 0.07760100  | -3.36897500 | -2.06504100 |
| H  | -0.47134800 | -2.82752000 | -2.83977400 |
| H  | 0.50397000  | -4.27247700 | -2.51958700 |
| H  | -0.62812700 | -3.67483600 | -1.28893300 |
| Ru | 1.03186900  | -0.52232300 | -0.45879800 |
| O  | 0.46090500  | 0.42130500  | 1.42883700  |
| C  | 0.63780300  | 1.56117900  | 0.90456600  |
| O  | 1.01102200  | 1.65503700  | -0.29675000 |
| C  | 0.45165100  | 2.81468900  | 1.77328600  |
| F  | -0.69007400 | 2.72514800  | 2.47633300  |
| F  | 0.42108900  | 3.92293000  | 1.03301400  |
| F  | 1.47932200  | 2.89347200  | 2.63696900  |
| C  | -2.14097300 | 4.22011700  | -1.92503900 |
| C  | -1.71568500 | 3.19869100  | -2.77929000 |
| C  | -1.70115200 | 1.87927300  | -2.33507800 |
| C  | -2.14700200 | 1.56760500  | -1.04068300 |
| C  | -2.57638700 | 2.59680600  | -0.18655000 |
| C  | -2.55926800 | 3.91955700  | -0.62674400 |
| H  | -2.14033700 | 5.25015500  | -2.26898600 |
| H  | -1.38955200 | 3.43296400  | -3.78810100 |
| H  | -2.88514400 | 2.37186900  | 0.82948300  |
| H  | -2.87199800 | 4.71391000  | 0.04393900  |
| C  | -2.07157400 | 0.15227400  | -0.59392800 |
| O  | -1.05232800 | -0.55642300 | -0.86436100 |
| N  | -3.09432200 | -0.42736700 | 0.06261700  |
| C  | -4.45202600 | 0.13129600  | 0.17668500  |
| H  | -5.17187100 | -0.64991700 | -0.07893000 |
| H  | -4.64574500 | 0.45829900  | 1.20317200  |
| H  | -4.57604200 | 0.97009300  | -0.50564900 |
| C  | -2.89984100 | -1.73983100 | 0.64662200  |
| C  | -2.17522400 | -1.85970600 | 1.83452700  |
| C  | -3.47485400 | -2.86011400 | 0.04248900  |

|   |             |             |             |
|---|-------------|-------------|-------------|
| C | -2.02173100 | -3.11917500 | 2.41770500  |
| H | -1.73148800 | -0.97865600 | 2.28771000  |
| C | -3.31855000 | -4.11551900 | 0.63361800  |
| H | -4.03597000 | -2.75227700 | -0.88160900 |
| C | -2.59254300 | -4.24632500 | 1.82054600  |
| H | -1.46883400 | -3.21505000 | 3.34776300  |
| H | -3.76918600 | -4.98787700 | 0.16963000  |
| H | -2.48145600 | -5.22233200 | 2.28372700  |
| H | -1.35810100 | 1.08257300  | -2.98755600 |

TS1-int

|    |             |             |             |
|----|-------------|-------------|-------------|
| C  | -0.97728100 | -2.41091900 | -3.99189200 |
| C  | -0.50738100 | -2.47460600 | -2.67984200 |
| C  | -1.06736200 | -1.65904200 | -1.67874400 |
| C  | -2.10468800 | -0.74882400 | -2.03766900 |
| C  | -2.54357800 | -0.65909200 | -3.35648800 |
| C  | -1.98599200 | -1.50334000 | -4.32565800 |
| H  | -0.54987000 | -3.05105400 | -4.75837600 |
| H  | 0.29792400  | -3.15119300 | -2.40986700 |
| H  | -1.17772400 | -2.16653100 | -0.57116300 |
| H  | -3.29078300 | 0.07284600  | -3.64710700 |
| H  | -2.33557900 | -1.43752600 | -5.35239100 |
| C  | -2.48228700 | 0.20281200  | -0.95480500 |
| O  | -1.54346900 | 0.57075100  | -0.17921000 |
| N  | -3.70372400 | 0.73936800  | -0.82749200 |
| C  | -4.91624000 | 0.11025600  | -1.37252800 |
| H  | -5.57336700 | -0.14510700 | -0.53831700 |
| H  | -5.43260300 | 0.79992600  | -2.04857300 |
| H  | -4.66200200 | -0.81186500 | -1.88953000 |
| Pd | 0.21983900  | -0.46799600 | -0.44802100 |
| C  | 2.91027000  | -1.26298700 | -1.16916300 |
| O  | 1.78846000  | -1.70493300 | -0.71977800 |
| O  | 3.24667700  | -0.12483700 | -1.47528500 |
| C  | -2.70538500 | -2.52691600 | 1.08952000  |
| O  | -3.55984400 | -1.85096300 | 0.49483500  |
| O  | -1.54755500 | -2.87843700 | 0.70753400  |
| C  | -3.09650100 | -2.97651700 | 2.52463900  |
| C  | 3.97011800  | -2.39556900 | -1.26713900 |
| C  | -3.92630600 | 1.70481900  | 0.22923400  |
| C  | -4.04442700 | 3.05508300  | -0.10130600 |
| C  | -4.07042900 | 1.26821300  | 1.54914800  |
| C  | -4.30678300 | 3.98851100  | 0.90423100  |
| H  | -3.93239600 | 3.36613000  | -1.13637200 |
| C  | -4.32844800 | 2.21006900  | 2.54578500  |

|         |             |             |             |
|---------|-------------|-------------|-------------|
| H       | -3.97245000 | 0.21123700  | 1.77705500  |
| C       | -4.44794600 | 3.56583600  | 2.22739700  |
| H       | -4.40310700 | 5.04107800  | 0.65230100  |
| H       | -4.43596800 | 1.88052500  | 3.57525900  |
| H       | -4.65216700 | 4.29173700  | 3.00973000  |
| F       | 3.42736400  | -3.59878100 | -1.51627600 |
| F       | 4.86249700  | -2.13473100 | -2.23531800 |
| F       | 4.64874700  | -2.47925800 | -0.09679200 |
| F       | -3.27888300 | -1.87889700 | 3.30634700  |
| F       | -4.26189500 | -3.65651500 | 2.51555000  |
| F       | -2.17573900 | -3.74686700 | 3.12155700  |
| C       | 0.37719800  | 4.19097400  | -2.84717100 |
| C       | -0.35115000 | 4.02733400  | -1.66689200 |
| C       | 0.16865100  | 3.26216300  | -0.62259700 |
| C       | 1.43514200  | 2.67571400  | -0.75268300 |
| C       | 2.16412700  | 2.83196600  | -1.94016900 |
| C       | 1.62903400  | 3.58523100  | -2.98498100 |
| H       | -0.03145600 | 4.78415000  | -3.66098200 |
| H       | -1.32758500 | 4.49053100  | -1.55579600 |
| H       | 3.11969800  | 2.33152300  | -2.05080000 |
| H       | 2.18963400  | 3.69547500  | -3.90902900 |
| C       | 1.96123800  | 1.85210000  | 0.38212200  |
| O       | 1.37028200  | 0.81069700  | 0.76823700  |
| N       | 3.05861000  | 2.26205300  | 1.05157900  |
| C       | 3.75518800  | 3.53111300  | 0.81928800  |
| H       | 3.90439400  | 4.03740800  | 1.77755100  |
| H       | 4.73568700  | 3.34688500  | 0.36654800  |
| H       | 3.16921300  | 4.17193100  | 0.16275300  |
| C       | 3.62438400  | 1.41108400  | 2.07775600  |
| C       | 4.41504300  | 0.32273200  | 1.70734000  |
| C       | 3.40629700  | 1.71362000  | 3.42298900  |
| C       | 4.98327000  | -0.47774900 | 2.69866300  |
| H       | 4.56046200  | 0.09979500  | 0.65662400  |
| C       | 3.98631800  | 0.91373400  | 4.40836500  |
| H       | 2.77778600  | 2.55778200  | 3.69325000  |
| C       | 4.77360000  | -0.18213000 | 4.04732800  |
| H       | 5.58104000  | -1.33695100 | 2.40976000  |
| H       | 3.81408600  | 1.14150300  | 5.45649200  |
| H       | 5.21676400  | -0.80822800 | 4.81663500  |
| H       | -0.40784700 | 3.10906500  | 0.28393100  |
| TS2-int |             |             |             |
| C       | -0.47679000 | -2.37590500 | -4.09248700 |
| C       | -1.58855900 | -1.66973200 | -4.56487100 |

|    |             |             |             |
|----|-------------|-------------|-------------|
| C  | -2.43837100 | -1.00008400 | -3.68374100 |
| C  | -2.17795400 | -1.01936100 | -2.31128800 |
| C  | -1.05391600 | -1.72597100 | -1.80276400 |
| C  | -0.21682300 | -2.39971700 | -2.72902000 |
| H  | 0.17427300  | -2.89858600 | -4.78650700 |
| H  | -1.79584500 | -1.63258000 | -5.63101600 |
| H  | -3.29494100 | -0.45376800 | -4.06585400 |
| H  | -1.15041200 | -2.19209400 | -0.74268300 |
| H  | 0.64289800  | -2.93480500 | -2.34116600 |
| N  | -3.12961200 | -0.39214300 | -1.45055200 |
| C  | -2.76371400 | 0.36266100  | -0.38976200 |
| O  | -1.56800700 | 0.59754700  | -0.06768700 |
| Pd | 0.13573500  | -0.42046100 | -0.50772400 |
| C  | -2.31233200 | -2.48487700 | 1.41203200  |
| O  | -3.34114200 | -1.91234000 | 1.00670300  |
| O  | -1.28891500 | -2.86097700 | 0.77816200  |
| C  | 2.87715400  | -0.95131100 | -1.31647500 |
| O  | 1.80529000  | -1.49358000 | -0.85498800 |
| C  | 4.00537800  | -2.00684700 | -1.48978800 |
| C  | -2.25694100 | -2.70772800 | 2.95154500  |
| O  | 3.11928600  | 0.21814200  | -1.58977200 |
| C  | -4.52926100 | -0.84905600 | -1.59838600 |
| H  | -5.02810900 | -0.77612300 | -0.63558300 |
| H  | -5.06563000 | -0.26251800 | -2.35057400 |
| H  | -4.51223800 | -1.89932000 | -1.89195700 |
| C  | -3.79870500 | 1.13736500  | 0.36025500  |
| C  | -3.87624100 | 1.03116700  | 1.75580000  |
| C  | -4.60536000 | 2.05871300  | -0.32251300 |
| C  | -4.77715800 | 1.83380800  | 2.45406000  |
| H  | -3.26918400 | 0.29582800  | 2.26940500  |
| C  | -5.49350300 | 2.86780000  | 0.38653100  |
| H  | -4.52725500 | 2.15357200  | -1.40237600 |
| C  | -5.58223500 | 2.75265300  | 1.77531400  |
| H  | -4.85192300 | 1.73759200  | 3.53338800  |
| H  | -6.11284300 | 3.58526700  | -0.14462200 |
| H  | -6.27901700 | 3.37718200  | 2.32790300  |
| F  | 4.64288400  | -2.19435800 | -0.31069000 |
| F  | 4.91624500  | -1.59564200 | -2.38456400 |
| F  | 3.53202300  | -3.19880100 | -1.89798300 |
| F  | -3.40928200 | -3.22341400 | 3.42526000  |
| F  | -1.25695500 | -3.50805300 | 3.35167800  |
| F  | -2.07812500 | -1.50238200 | 3.56929500  |
| C  | -0.11042500 | 4.44444700  | -2.53368100 |
| C  | -0.75961200 | 4.19577200  | -1.32218100 |

|   |             |             |             |
|---|-------------|-------------|-------------|
| C | -0.15654600 | 3.38798900  | -0.35775700 |
| C | 1.11009100  | 2.83943500  | -0.60106000 |
| C | 1.76054000  | 3.08309200  | -1.81877800 |
| C | 1.14418200  | 3.88184800  | -2.78226800 |
| H | -0.58314900 | 5.07137900  | -3.28508900 |
| H | -1.73891200 | 4.62397800  | -1.12700300 |
| H | 2.71950200  | 2.61666100  | -2.01468400 |
| H | 1.64457500  | 4.06154600  | -3.72973200 |
| C | 1.72881000  | 1.96606400  | 0.44794400  |
| O | 1.22866200  | 0.85536400  | 0.76478200  |
| N | 2.81478000  | 2.40038500  | 1.11889900  |
| C | 3.41878900  | 3.72718200  | 0.96286900  |
| H | 3.54146300  | 4.18326300  | 1.94984800  |
| H | 4.40525200  | 3.63874500  | 0.49474000  |
| H | 2.78371200  | 4.36366700  | 0.34919900  |
| C | 3.46462500  | 1.51814600  | 2.06607100  |
| C | 4.33991200  | 0.53685700  | 1.59950700  |
| C | 3.23667700  | 1.68467600  | 3.43299800  |
| C | 4.98356700  | -0.29574500 | 2.51529300  |
| H | 4.49078300  | 0.41874200  | 0.53250700  |
| C | 3.89204000  | 0.85426600  | 4.34299700  |
| H | 2.54213300  | 2.44594000  | 3.77734600  |
| C | 4.76390700  | -0.13628600 | 3.88509000  |
| H | 5.64635700  | -1.07478700 | 2.15103500  |
| H | 3.71202900  | 0.97458400  | 5.40745400  |
| H | 5.26497900  | -0.78789800 | 4.59537000  |
| H | -0.66833500 | 3.17074200  | 0.57401500  |

TS1

|   |             |             |             |
|---|-------------|-------------|-------------|
| C | -0.97728100 | -2.41091900 | -3.99189200 |
| C | -0.50738100 | -2.47460600 | -2.67984200 |
| C | -1.06736200 | -1.65904200 | -1.67874400 |
| C | -2.10468800 | -0.74882400 | -2.03766900 |
| C | -2.54357800 | -0.65909200 | -3.35648800 |
| C | -1.98599200 | -1.50334000 | -4.32565800 |
| H | -0.54987000 | -3.05105400 | -4.75837600 |
| H | 0.29792400  | -3.15119300 | -2.40986700 |
| H | -1.17772400 | -2.16653100 | -0.57116300 |
| H | -3.29078300 | 0.07284600  | -3.64710700 |
| H | -2.33557900 | -1.43752600 | -5.35239100 |
| C | -2.48228700 | 0.20281200  | -0.95480500 |
| O | -1.54346900 | 0.57075100  | -0.17921000 |
| N | -3.70372400 | 0.73936800  | -0.82749200 |
| C | -4.91624000 | 0.11025600  | -1.37252800 |

|    |             |             |             |
|----|-------------|-------------|-------------|
| H  | -5.57336700 | -0.14510700 | -0.53831700 |
| H  | -5.43260300 | 0.79992600  | -2.04857300 |
| H  | -4.66200200 | -0.81186500 | -1.88953000 |
| Pd | 0.21983900  | -0.46799600 | -0.44802100 |
| C  | 2.91027000  | -1.26298700 | -1.16916300 |
| O  | 1.78846000  | -1.70493300 | -0.71977800 |
| O  | 3.24667700  | -0.12483700 | -1.47528500 |
| C  | -2.70538500 | -2.52691600 | 1.08952000  |
| O  | -3.55984400 | -1.85096300 | 0.49483500  |
| O  | -1.54755500 | -2.87843700 | 0.70753400  |
| C  | -3.09650100 | -2.97651700 | 2.52463900  |
| C  | 3.97011800  | -2.39556900 | -1.26713900 |
| C  | -3.92630600 | 1.70481900  | 0.22923400  |
| C  | -4.04442700 | 3.05508300  | -0.10130600 |
| C  | -4.07042900 | 1.26821300  | 1.54914800  |
| C  | -4.30678300 | 3.98851100  | 0.90423100  |
| H  | -3.93239600 | 3.36613000  | -1.13637200 |
| C  | -4.32844800 | 2.21006900  | 2.54578500  |
| H  | -3.97245000 | 0.21123700  | 1.77705500  |
| C  | -4.44794600 | 3.56583600  | 2.22739700  |
| H  | -4.40310700 | 5.04107800  | 0.65230100  |
| H  | -4.43596800 | 1.88052500  | 3.57525900  |
| H  | -4.65216700 | 4.29173700  | 3.00973000  |
| F  | 3.42736400  | -3.59878100 | -1.51627600 |
| F  | 4.86249700  | -2.13473100 | -2.23531800 |
| F  | 4.64874700  | -2.47925800 | -0.09679200 |
| F  | -3.27888300 | -1.87889700 | 3.30634700  |
| F  | -4.26189500 | -3.65651500 | 2.51555000  |
| F  | -2.17573900 | -3.74686700 | 3.12155700  |
| C  | 0.37719800  | 4.19097400  | -2.84717100 |
| C  | -0.35115000 | 4.02733400  | -1.66689200 |
| C  | 0.16865100  | 3.26216300  | -0.62259700 |
| C  | 1.43514200  | 2.67571400  | -0.75268300 |
| C  | 2.16412700  | 2.83196600  | -1.94016900 |
| C  | 1.62903400  | 3.58523100  | -2.98498100 |
| H  | -0.03145600 | 4.78415000  | -3.66098200 |
| H  | -1.32758500 | 4.49053100  | -1.55579600 |
| H  | 3.11969800  | 2.33152300  | -2.05080000 |
| H  | 2.18963400  | 3.69547500  | -3.90902900 |
| C  | 1.96123800  | 1.85210000  | 0.38212200  |
| O  | 1.37028200  | 0.81069700  | 0.76823700  |
| N  | 3.05861000  | 2.26205300  | 1.05157900  |
| C  | 3.75518800  | 3.53111300  | 0.81928800  |
| H  | 3.90439400  | 4.03740800  | 1.77755100  |

|   |             |             |            |
|---|-------------|-------------|------------|
| H | 4.73568700  | 3.34688500  | 0.36654800 |
| H | 3.16921300  | 4.17193100  | 0.16275300 |
| C | 3.62438400  | 1.41108400  | 2.07775600 |
| C | 4.41504300  | 0.32273200  | 1.70734000 |
| C | 3.40629700  | 1.71362000  | 3.42298900 |
| C | 4.98327000  | -0.47774900 | 2.69866300 |
| H | 4.56046200  | 0.09979500  | 0.65662400 |
| C | 3.98631800  | 0.91373400  | 4.40836500 |
| H | 2.77778600  | 2.55778200  | 3.69325000 |
| C | 4.77360000  | -0.18213000 | 4.04732800 |
| H | 5.58104000  | -1.33695100 | 2.40976000 |
| H | 3.81408600  | 1.14150300  | 5.45649200 |
| H | 5.21676400  | -0.80822800 | 4.81663500 |
| H | -0.40784700 | 3.10906500  | 0.28393100 |

TS2

|    |             |             |             |
|----|-------------|-------------|-------------|
| C  | -0.67060500 | -2.49561100 | -4.00078800 |
| C  | -1.80909600 | -1.82837900 | -4.46458700 |
| C  | -2.60235400 | -1.08232200 | -3.59366400 |
| C  | -2.25683500 | -0.97882800 | -2.24258400 |
| C  | -1.09632000 | -1.63461400 | -1.74342200 |
| C  | -0.32179000 | -2.39082200 | -2.66135200 |
| H  | -0.06497200 | -3.08457100 | -4.68292300 |
| H  | -2.08498200 | -1.88567600 | -5.51416200 |
| H  | -3.48371900 | -0.57316500 | -3.97007000 |
| H  | -1.21073200 | -2.13172500 | -0.63890400 |
| H  | 0.56258200  | -2.89203300 | -2.28374100 |
| N  | -3.16717700 | -0.28735900 | -1.38662400 |
| C  | -2.76252900 | 0.48044800  | -0.34939300 |
| O  | -1.55861600 | 0.69184200  | -0.04842200 |
| Pd | 0.10979600  | -0.38262000 | -0.48776800 |
| C  | -2.34247400 | -2.48544400 | 1.37719900  |
| O  | -3.35794300 | -1.87036600 | 1.02025000  |
| O  | -1.33109900 | -2.84711100 | 0.70138300  |
| C  | 2.83155300  | -1.03622700 | -1.30384500 |
| O  | 1.74304800  | -1.52604200 | -0.82591300 |
| C  | 3.92029800  | -2.13560100 | -1.45656600 |
| C  | -2.25866900 | -2.80188300 | 2.89687400  |
| O  | 3.11879100  | 0.11644500  | -1.60564900 |
| C  | -4.59023900 | -0.67316300 | -1.51308400 |
| H  | -5.07494500 | -0.56957200 | -0.54599900 |
| H  | -5.10670800 | -0.06226000 | -2.25979000 |
| H  | -4.63048900 | -1.72364600 | -1.80214900 |
| C  | -3.76783600 | 1.26888200  | 0.42799700  |



|   |             |             |             |
|---|-------------|-------------|-------------|
| C | -3.84112000 | 1.11581400  | 1.81939100  |
| C | -4.55034600 | 2.23616500  | -0.21772900 |
| C | -4.71358700 | 1.92026300  | 2.55135900  |
| H | -3.25249600 | 0.34589200  | 2.30402600  |
| C | -5.40875300 | 3.04686200  | 0.52530000  |
| H | -4.47729300 | 2.36405000  | -1.29463400 |
| C | -5.49315900 | 2.88648600  | 1.90994100  |
| H | -4.78495800 | 1.78926900  | 3.62724000  |
| H | -6.00904300 | 3.80078400  | 0.02362000  |
| H | -6.16701900 | 3.51276000  | 2.48831300  |
| F | 4.58147300  | -2.28976000 | -0.28477900 |
| F | 4.82206000  | -1.79582900 | -2.39024500 |
| F | 3.40136300  | -3.32938800 | -1.79774500 |
| F | -3.40727800 | -3.33829100 | 3.35416500  |
| F | -1.25808100 | -3.63076300 | 3.22775300  |
| F | -2.06218200 | -1.63640800 | 3.57618400  |
| C | -0.01424100 | 4.40515000  | -2.65154600 |
| C | -0.63473400 | 4.24501300  | -1.41052200 |
| C | -0.03979200 | 3.45419400  | -0.42712100 |
| C | 1.19111000  | 2.83410100  | -0.68098200 |
| C | 1.81305300  | 2.98964800  | -1.92761300 |
| C | 1.20413900  | 3.77168600  | -2.90951100 |
| H | -0.48082500 | 5.01864000  | -3.41773600 |
| H | -1.58530800 | 4.73021600  | -1.20653100 |
| H | 2.74205000  | 2.46827200  | -2.12918800 |
| H | 1.68212100  | 3.88284000  | -3.87886000 |
| C | 1.79832900  | 1.97486900  | 0.38791700  |
| O | 1.26967000  | 0.89089100  | 0.74227300  |
| N | 2.90650700  | 2.40094300  | 1.02938000  |
| C | 3.55464500  | 3.69653900  | 0.80555500  |
| H | 3.71189500  | 4.19122000  | 1.76882000  |
| H | 4.52855900  | 3.55198600  | 0.32505500  |
| H | 2.93202000  | 4.32856200  | 0.17467500  |
| C | 3.54741900  | 1.53386900  | 1.99588200  |
| C | 4.37058100  | 0.49936900  | 1.54974300  |
| C | 3.36770700  | 1.76880800  | 3.36008200  |
| C | 5.00979100  | -0.31661700 | 2.48340300  |
| H | 4.48579800  | 0.32950100  | 0.48542300  |
| C | 4.01873900  | 0.95447300  | 4.28771900  |
| H | 2.71422700  | 2.57196500  | 3.68951200  |
| C | 4.83838600  | -0.08851800 | 3.85041400  |
| H | 5.63180900  | -1.13578000 | 2.13555400  |
| H | 3.87657000  | 1.12925100  | 5.35041000  |
| H | 5.33651300  | -0.72681500 | 4.57476800  |

|           |             |             |             |
|-----------|-------------|-------------|-------------|
| H         | -0.53121500 | 3.30649400  | 0.52914400  |
| TS1_inner |             |             |             |
| C         | 1.70645600  | -3.55517300 | -2.26258600 |
| C         | 1.96092500  | -2.46766500 | -1.42394500 |
| C         | 0.95501400  | -1.90083100 | -0.62377900 |
| C         | -0.35029700 | -2.46652700 | -0.70735300 |
| C         | -0.60769800 | -3.53933300 | -1.56918100 |
| C         | 0.42138400  | -4.08990100 | -2.33585000 |
| H         | 2.50660800  | -3.97249000 | -2.86732100 |
| H         | 2.96825100  | -2.06383300 | -1.37599600 |
| H         | 1.68604200  | -1.50433800 | 0.51427500  |
| H         | -1.61584200 | -3.92092400 | -1.68998700 |
| H         | 0.21013700  | -4.92089700 | -3.00246400 |
| C         | -1.44035500 | -1.67033000 | -0.08290700 |
| O         | -1.27807300 | -0.41494900 | -0.02415200 |
| N         | -2.59576700 | -2.19784900 | 0.37399300  |
| C         | -2.82389500 | -3.62930900 | 0.60143700  |
| H         | -3.32426500 | -3.75102700 | 1.56477300  |
| H         | -3.46836700 | -4.05699000 | -0.17533100 |
| H         | -1.87583100 | -4.16535900 | 0.62900200  |
| Pd        | 0.68674000  | 0.17921400  | -0.20325800 |
| C         | -0.36055200 | 2.64397500  | -0.99601900 |
| O         | 0.22230300  | 2.13561000  | 0.04348500  |
| O         | -0.60354700 | 2.11495500  | -2.06956500 |
| C         | 3.23936700  | -0.20342400 | 0.84232100  |
| O         | 2.69226000  | 0.63669700  | 0.08547200  |
| O         | 2.74579500  | -1.29927200 | 1.24730100  |
| C         | 4.69290400  | 0.07908900  | 1.27797900  |
| C         | -0.77135800 | 4.11787000  | -0.73861800 |
| C         | -3.66375600 | -1.29892600 | 0.75941100  |
| C         | -4.35854900 | -0.59301600 | -0.22472900 |
| C         | -4.00548700 | -1.16621800 | 2.10684900  |
| C         | -5.40322200 | 0.25299400  | 0.14650500  |
| H         | -4.07247300 | -0.69612400 | -1.26680800 |
| C         | -5.05636200 | -0.32339100 | 2.46959200  |
| H         | -3.44295700 | -1.70246400 | 2.86605000  |
| C         | -5.75568000 | 0.38614300  | 1.49120200  |
| H         | -5.93876900 | 0.80952700  | -0.61679400 |
| H         | -5.31907400 | -0.21344700 | 3.51764000  |
| H         | -6.56919900 | 1.04666600  | 1.77665700  |
| F         | 0.29769400  | 4.86958500  | -0.40864500 |
| F         | -1.34006000 | 4.66147800  | -1.82407300 |
| F         | -1.65907100 | 4.19440600  | 0.27593200  |

|           |             |             |             |
|-----------|-------------|-------------|-------------|
| F         | 5.03280000  | 1.35185500  | 1.07414100  |
| F         | 4.85860000  | -0.21213600 | 2.57467800  |
| F         | 5.51371500  | -0.70826800 | 0.55417800  |
| TS2_inner |             |             |             |
| C         | -2.22853200 | -3.20081900 | 2.46754800  |
| C         | -1.22106200 | -4.15089200 | 2.28708800  |
| C         | -0.19262400 | -3.92089800 | 1.37168800  |
| C         | -0.17324700 | -2.73929800 | 0.62797600  |
| C         | -1.20139600 | -1.77696500 | 0.75662900  |
| C         | -2.20980900 | -2.03163400 | 1.71177100  |
| H         | -3.02063000 | -3.37357000 | 3.19010300  |
| H         | -1.22141200 | -5.06674000 | 2.87126000  |
| H         | 0.61201500  | -4.64296500 | 1.26812400  |
| H         | -1.84184400 | -1.33673300 | -0.37096300 |
| H         | -3.00553300 | -1.30164100 | 1.83609500  |
| N         | 0.95408900  | -2.52928700 | -0.24884600 |
| C         | 1.73575200  | -1.43414800 | -0.05619200 |
| O         | 1.35430000  | -0.48644200 | 0.68744200  |
| Pd        | -0.55356200 | 0.21488000  | 0.41543700  |
| C         | -3.05491000 | 0.21611300  | -0.89854300 |
| O         | -2.41720200 | 0.96337400  | -0.11684600 |
| O         | -2.76588500 | -0.97537200 | -1.21751100 |
| C         | 0.71404900  | 2.65017600  | 1.11276800  |
| O         | 0.30255600  | 2.03269900  | 0.05145600  |
| C         | 1.61912400  | 3.84945800  | 0.72624500  |
| C         | -4.36068300 | 0.77659200  | -1.50434400 |
| O         | 0.50558500  | 2.38792600  | 2.28538300  |
| C         | 1.13291000  | -3.50131000 | -1.33767700 |
| H         | 1.81296800  | -3.09611500 | -2.08552200 |
| H         | 1.52846000  | -4.45488900 | -0.97237400 |
| H         | 0.15918800  | -3.68006300 | -1.80168800 |
| C         | 3.08299600  | -1.29662800 | -0.66550500 |
| C         | 3.49621100  | 0.00467800  | -1.00453200 |
| C         | 3.97247700  | -2.37310500 | -0.81824300 |
| C         | 4.76799700  | 0.21090700  | -1.53308200 |
| H         | 2.82318500  | 0.83986200  | -0.83865100 |
| C         | 5.24953900  | -2.15449700 | -1.33049600 |
| H         | 3.68502700  | -3.37199800 | -0.50578800 |
| C         | 5.64348200  | -0.86543300 | -1.69923300 |
| H         | 5.07867100  | 1.21559500  | -1.80326100 |
| H         | 5.93918300  | -2.98717800 | -1.43358900 |
| H         | 6.63804500  | -0.69888700 | -2.10364700 |
| F         | 2.72853900  | 3.40167100  | 0.08145600  |

|   |             |            |             |
|---|-------------|------------|-------------|
| F | 2.02510300  | 4.53516700 | 1.80140500  |
| F | 0.98882500  | 4.70444700 | -0.10183100 |
| F | -4.41430400 | 0.50846200 | -2.81680300 |
| F | -5.40851800 | 0.18079200 | -0.90390900 |
| F | -4.46082000 | 2.09441500 | -1.32930400 |

TS3\_benzene

|   |             |             |             |
|---|-------------|-------------|-------------|
| C | -2.73326300 | -2.47994100 | -2.55079300 |
| C | -2.63714000 | -1.26323100 | -1.87119200 |
| C | -1.46693500 | -0.90596400 | -1.17516300 |
| C | -0.36001300 | -1.80220500 | -1.23943600 |
| C | -0.46344100 | -3.03142500 | -1.89384000 |
| C | -1.65710800 | -3.37014600 | -2.54108000 |
| H | -3.64498100 | -2.73793500 | -3.08182800 |
| H | -3.47590100 | -0.57191900 | -1.89680800 |
| H | -1.08649300 | 0.33563600  | -1.49041900 |
| H | 0.35555200  | -3.74260800 | -1.88695000 |
| H | -1.73885500 | -4.32803900 | -3.04589800 |
| C | 0.81166000  | -1.33482900 | -0.45180400 |
| O | 0.55466700  | -0.60425500 | 0.56100800  |
| N | 2.08997500  | -1.60154600 | -0.75042000 |
| C | 2.55319800  | -2.23946300 | -1.99444900 |
| H | 3.45630300  | -1.71834200 | -2.31805300 |
| H | 2.80024500  | -3.29378300 | -1.83086900 |
| H | 1.79791300  | -2.15296200 | -2.77501300 |
| C | 3.13516800  | -1.13182900 | 0.14413800  |
| C | 3.74902000  | -2.04447200 | 1.00244200  |
| C | 3.54782600  | 0.20135300  | 0.09217200  |
| C | 4.79310600  | -1.61443400 | 1.82386000  |
| H | 3.41444800  | -3.07772600 | 1.02732700  |
| C | 4.59019000  | 0.62134300  | 0.91900600  |
| H | 3.05646800  | 0.90203700  | -0.57601000 |
| C | 5.21370000  | -0.28386500 | 1.78171000  |
| H | 5.27680100  | -2.32011200 | 2.49250800  |
| H | 4.91606300  | 1.65657400  | 0.88605600  |
| H | 6.02771600  | 0.04786400  | 2.41924900  |
| C | -1.97154600 | 1.00381500  | 2.83283900  |
| C | -1.44887400 | -0.28066500 | 3.05358500  |
| C | -2.01863900 | -1.41659200 | 2.38446400  |
| C | -3.10469400 | -1.24231400 | 1.50614300  |
| C | -3.62251600 | 0.07066600  | 1.25494100  |
| C | -3.04772300 | 1.18175200  | 1.90342200  |
| H | -1.49338900 | 1.87051600  | 3.27528700  |
| H | -0.56878400 | -0.40806400 | 3.67469600  |

|    |             |             |             |
|----|-------------|-------------|-------------|
| H  | -3.50133200 | -2.09137700 | 0.96134100  |
| H  | -4.41861100 | 0.21467700  | 0.53357400  |
| Ru | -1.41628900 | 0.07563000  | 0.81895200  |
| O  | -0.54577900 | 1.90422000  | 0.20283200  |
| C  | -0.26829500 | 2.13780900  | -1.00099200 |
| O  | -0.52350700 | 1.39576000  | -1.98699900 |
| C  | 0.51982400  | 3.43360000  | -1.30016700 |
| F  | 0.43276100  | 4.30105600  | -0.29107000 |
| F  | 0.07433200  | 4.01036600  | -2.41706800 |
| F  | 1.81683000  | 3.09913300  | -1.47224800 |
| H  | -3.38384000 | 2.18364100  | 1.65926200  |
| H  | -1.58181700 | -2.39955300 | 2.52150700  |

TS3\_p-dimethylbenzene\_cf1

|   |             |             |             |
|---|-------------|-------------|-------------|
| C | 2.39073700  | -2.67404600 | 2.68039200  |
| C | 2.32702600  | -1.40673100 | 2.09458100  |
| C | 1.22497900  | -1.01613100 | 1.31072600  |
| C | 0.14505100  | -1.93913400 | 1.18931800  |
| C | 0.22115900  | -3.21887000 | 1.74391500  |
| C | 1.35150600  | -3.58565900 | 2.48262600  |
| H | 3.24891800  | -2.95328300 | 3.28511500  |
| H | 3.13484300  | -0.70034000 | 2.27015900  |
| H | 0.77120300  | 0.18401800  | 1.72300000  |
| H | -0.57050000 | -3.94473200 | 1.59234000  |
| H | 1.41059900  | -4.58096500 | 2.91273200  |
| C | -0.96622700 | -1.42453600 | 0.34557800  |
| O | -0.64910300 | -0.58557100 | -0.55816100 |
| N | -2.25715200 | -1.75709700 | 0.49703800  |
| C | -2.80860000 | -2.52315400 | 1.62719800  |
| H | -3.75984800 | -2.06528100 | 1.90554900  |
| H | -2.99400200 | -3.56601600 | 1.34849700  |
| H | -2.13563600 | -2.48335500 | 2.48329600  |
| C | -3.23303300 | -1.23146400 | -0.44262800 |
| C | -3.73960000 | -2.07561800 | -1.43133600 |
| C | -3.69091600 | 0.08142600  | -0.31127300 |
| C | -4.71918500 | -1.59706000 | -2.30380300 |
| H | -3.37198000 | -3.09434400 | -1.51683500 |
| C | -4.66780000 | 0.55098000  | -1.18976100 |
| H | -3.28317700 | 0.72959300  | 0.45846200  |
| C | -5.18312700 | -0.28593100 | -2.18303900 |
| H | -5.11900100 | -2.25005500 | -3.07376200 |
| H | -5.02773000 | 1.57104700  | -1.09504200 |
| H | -5.94691700 | 0.08357200  | -2.86074100 |
| C | 2.23471400  | 1.58720700  | -2.15643600 |

|    |             |             |             |
|----|-------------|-------------|-------------|
| C  | 1.56832600  | 0.52008800  | -2.79232400 |
| C  | 1.87556500  | -0.83926600 | -2.46011100 |
| C  | 2.87910600  | -1.17411000 | -1.52264000 |
| C  | 3.50722200  | -0.08059400 | -0.83571000 |
| C  | 3.19331500  | 1.26301800  | -1.13613900 |
| H  | 0.76850800  | 0.72778400  | -3.49485900 |
| H  | 4.21622500  | -0.29202400 | -0.04199300 |
| Ru | 1.31373500  | 0.18515700  | -0.56234700 |
| O  | 0.33275300  | 1.91526000  | 0.18033900  |
| C  | -0.04746100 | 2.00758600  | 1.37423600  |
| O  | 0.14070300  | 1.15743600  | 2.28608300  |
| C  | -0.88294800 | 3.25442400  | 1.74094100  |
| F  | -0.59410200 | 4.27939100  | 0.93408900  |
| F  | -0.67481200 | 3.61830200  | 3.00589400  |
| F  | -2.18679900 | 2.93965100  | 1.58813500  |
| H  | 3.65959500  | 2.06204100  | -0.56928700 |
| H  | 1.29774400  | -1.63301200 | -2.92367600 |
| C  | 3.25814500  | -2.60243300 | -1.24283800 |
| H  | 2.44611500  | -3.28691300 | -1.50340500 |
| H  | 4.13406300  | -2.87693200 | -1.84397300 |
| H  | 3.51377500  | -2.75170600 | -0.19063500 |
| C  | 1.88117500  | 3.02085400  | -2.43344400 |
| H  | 1.60115600  | 3.53614600  | -1.50908000 |
| H  | 2.74575300  | 3.54073900  | -2.86361600 |
| H  | 1.04782100  | 3.09860800  | -3.13556800 |

TS3\_p-dimethylbenzene\_cf2

|   |             |             |              |
|---|-------------|-------------|--------------|
| C | 2.01834600  | -2.51240700 | 3.09116000   |
| C | 2.13357100  | -1.36294200 | 2.30571300   |
| C | 1.07978600  | -0.93442800 | 1.47722600   |
| C | -0.13523000 | -1.67786100 | 1.52028400   |
| C | -0.24423100 | -2.84334000 | 2.28300700   |
| C | 0.84072800  | -3.26303100 | 3.06000300   |
| H | 2.84478400  | -2.82771100 | 3.72168800   |
| H | 3.05089800  | -0.78079600 | 2.34800000   |
| H | 0.82862500  | 0.38445000  | 1.64948300   |
| H | -1.14659400 | -3.44505100 | 2.26324000   |
| H | 0.75840200  | -4.17159700 | 3.64895500   |
| C | -1.17439400 | -1.14492700 | 0.59958400   |
| O | -0.75284400 | -0.54879000 | -0.444404500 |
| N | -2.49626200 | -1.22383300 | 0.81314200   |
| C | -3.12578600 | -1.67809400 | 2.06451400   |
| H | -3.97280800 | -1.02002100 | 2.26857100   |
| H | -3.49765500 | -2.70416400 | 1.97275700   |

|    |             |             |             |
|----|-------------|-------------|-------------|
| H  | -2.42225500 | -1.61347400 | 2.89396200  |
| C  | -3.40577200 | -0.72027600 | -0.20188900 |
| C  | -4.10177900 | -1.63328900 | -0.99497800 |
| C  | -3.61524500 | 0.65437700  | -0.33209400 |
| C  | -5.02053500 | -1.16252000 | -1.93527900 |
| H  | -3.92740500 | -2.69920400 | -0.87748800 |
| C  | -4.53303600 | 1.11473500  | -1.27666100 |
| H  | -3.06312200 | 1.35412600  | 0.28767700  |
| C  | -5.23618200 | 0.20958600  | -2.07591700 |
| H  | -5.56691200 | -1.86843700 | -2.55354300 |
| H  | -4.70005000 | 2.18217100  | -1.38495000 |
| H  | -5.95282600 | 0.57393200  | -2.80587000 |
| C  | 2.17229500  | 0.53494300  | -2.57845000 |
| C  | 1.48301000  | -0.67254200 | -2.76623000 |
| C  | 1.80116900  | -1.84598400 | -1.99140600 |
| C  | 2.82582700  | -1.73114400 | -1.02748500 |
| C  | 3.51380600  | -0.49119800 | -0.81544800 |
| C  | 3.19862400  | 0.65638800  | -1.57731400 |
| H  | 1.85414400  | 1.42025200  | -3.11941500 |
| H  | 0.64733900  | -0.70568900 | -3.45818600 |
| H  | 3.04961000  | -2.57540900 | -0.38434100 |
| H  | 4.25480500  | -0.42104700 | -0.02643600 |
| Ru | 1.31609800  | -0.14121300 | -0.58725300 |
| O  | 0.66595800  | 1.84928300  | -0.20490600 |
| C  | 0.32460500  | 2.21988400  | 0.94542400  |
| O  | 0.37866800  | 1.53113300  | 2.00156400  |
| C  | -0.28252700 | 3.63540100  | 1.06940400  |
| F  | 0.16516300  | 4.43678600  | 0.09958800  |
| F  | 0.00024100  | 4.17811700  | 2.25338500  |
| F  | -1.62306600 | 3.52355900  | 0.95200200  |
| C  | 1.04410900  | -3.12844700 | -2.20186900 |
| H  | -0.01423700 | -2.93302400 | -2.39847500 |
| H  | 1.45202500  | -3.66411200 | -3.06822600 |
| H  | 1.12332300  | -3.78505900 | -1.33137900 |
| C  | 3.87234900  | 1.98003900  | -1.34050300 |
| H  | 4.59761200  | 2.17574900  | -2.14007500 |
| H  | 3.14318900  | 2.79573300  | -1.34151300 |
| H  | 4.40828500  | 1.99188800  | -0.38775000 |

TS3\_p-dimethylbenzene\_cf3

|   |            |             |            |
|---|------------|-------------|------------|
| C | 2.37072200 | -2.23262100 | 3.07280100 |
| C | 2.36641800 | -1.11824100 | 2.23037000 |
| C | 1.24305000 | -0.79429300 | 1.44758400 |
| C | 0.08221600 | -1.60678500 | 1.60034600 |

|    |             |             |             |
|----|-------------|-------------|-------------|
| C  | 0.09194400  | -2.73863300 | 2.41958100  |
| C  | 1.24429000  | -3.05472300 | 3.14661200  |
| H  | 3.25033700  | -2.46441100 | 3.66659600  |
| H  | 3.24310000  | -0.47690700 | 2.19512400  |
| H  | 0.93031900  | 0.51074500  | 1.58099100  |
| H  | -0.77026300 | -3.39389900 | 2.48273200  |
| H  | 1.25409100  | -3.93727000 | 3.77912000  |
| C  | -1.04457300 | -1.18232300 | 0.72938000  |
| O  | -0.72928000 | -0.60811500 | -0.36344000 |
| N  | -2.34223000 | -1.33628800 | 1.03085800  |
| C  | -2.86144200 | -1.76132800 | 2.34189600  |
| H  | -3.73662600 | -1.14849200 | 2.56690400  |
| H  | -3.16832500 | -2.81252500 | 2.32650800  |
| H  | -2.11399100 | -1.60628800 | 3.11934400  |
| C  | -3.34437200 | -0.94192100 | 0.05575700  |
| C  | -4.00770100 | -1.93399600 | -0.66748200 |
| C  | -3.67165700 | 0.40664100  | -0.10206100 |
| C  | -5.01342300 | -1.56977300 | -1.56513300 |
| H  | -3.74150100 | -2.97806400 | -0.52801500 |
| C  | -4.67596200 | 0.76028700  | -1.00365300 |
| H  | -3.14431600 | 1.16855500  | 0.46381100  |
| C  | -5.34739800 | -0.22465000 | -1.73287000 |
| H  | -5.53568500 | -2.33749000 | -2.12815300 |
| H  | -4.93554300 | 1.80669300  | -1.13277300 |
| H  | -6.13211200 | 0.05641700  | -2.42885100 |
| C  | 1.74347400  | 0.38057700  | -2.84877900 |
| C  | 1.28434300  | -0.95174300 | -2.77410800 |
| C  | 1.94805300  | -1.84268300 | -1.85994600 |
| C  | 3.03904600  | -1.39764400 | -1.08352200 |
| C  | 3.52093800  | -0.04786600 | -1.15995600 |
| C  | 2.82323500  | 0.82695700  | -2.02553500 |
| H  | 1.21193200  | 1.09901200  | -3.46317900 |
| H  | 3.48748300  | -2.07796300 | -0.36717400 |
| Ru | 1.28998300  | -0.07430000 | -0.66564400 |
| O  | 0.51326600  | 1.87066000  | -0.31208000 |
| C  | 0.23185500  | 2.27078000  | 0.84432600  |
| O  | 0.42962700  | 1.64622400  | 1.92282800  |
| C  | -0.48470100 | 3.63478900  | 0.96124600  |
| F  | -0.31593400 | 4.36854200  | -0.13995500 |
| F  | -0.03884600 | 4.31643900  | 2.01766900  |
| F  | -1.80458500 | 3.39827200  | 1.12415800  |
| H  | 3.08487100  | 1.88061500  | -2.03508500 |
| H  | 1.58455100  | -2.85821800 | -1.74286600 |
| C  | 4.71674700  | 0.41435400  | -0.37050700 |



|   |             |             |             |
|---|-------------|-------------|-------------|
| H | 4.62558900  | 1.46590300  | -0.08369900 |
| H | 4.86125100  | -0.18350400 | 0.53289000  |
| H | 5.62284600  | 0.31202600  | -0.98103600 |
| C | 0.09503100  | -1.42281900 | -3.56289500 |
| H | -0.60138700 | -1.97718400 | -2.92672000 |
| H | -0.44298200 | -0.58581900 | -4.01394600 |
| H | 0.42730200  | -2.09222400 | -4.36619400 |

TS3\_cf2

|   |             |             |             |
|---|-------------|-------------|-------------|
| C | 0.80459100  | -3.13433600 | 3.12535800  |
| C | 1.24969100  | -2.00511800 | 2.43366400  |
| C | 0.40544400  | -1.30568600 | 1.55115300  |
| C | -0.94339200 | -1.75158600 | 1.44213300  |
| C | -1.38460000 | -2.89573200 | 2.11206300  |
| C | -0.50251800 | -3.59166900 | 2.94537600  |
| H | 1.47502700  | -3.66110100 | 3.79846700  |
| H | 2.26458300  | -1.65047700 | 2.59577800  |
| H | 0.46335100  | 0.02933600  | 1.80799200  |
| H | -2.39282000 | -3.27233900 | 1.97574800  |
| H | -0.84333700 | -4.48462500 | 3.46071300  |
| C | -1.74400000 | -0.96334700 | 0.46761300  |
| O | -1.10469200 | -0.44660500 | -0.50495800 |
| N | -3.06450800 | -0.74819900 | 0.56752700  |
| C | -3.88876000 | -1.08596400 | 1.74039900  |
| H | -4.58042400 | -0.25836400 | 1.91034400  |
| H | -4.47261500 | -1.99634700 | 1.56773800  |
| H | -3.26490700 | -1.21052600 | 2.62491100  |
| C | -3.74590600 | -0.01841300 | -0.48753800 |
| C | -4.56716500 | -0.72138900 | -1.36999300 |
| C | -3.62553800 | 1.37080100  | -0.56691600 |
| C | -5.27767300 | -0.02295400 | -2.34836800 |
| H | -4.65055500 | -1.80177300 | -1.29113700 |
| C | -4.33665900 | 2.05898200  | -1.55026400 |
| H | -2.98084600 | 1.90588700  | 0.12347400  |
| C | -5.16310300 | 1.36544900  | -2.43826300 |
| H | -5.92059100 | -0.56460500 | -3.03566200 |
| H | -4.24723400 | 3.13895700  | -1.61875000 |
| H | -5.71864700 | 1.90744300  | -3.19771000 |
| C | 2.32874600  | 0.14110700  | -2.17177400 |
| C | 1.35581400  | -0.76238600 | -2.62980500 |
| C | 1.20029600  | -2.05957200 | -2.02274400 |
| C | 2.05017100  | -2.38576700 | -0.94409800 |
| C | 3.01624100  | -1.44479400 | -0.46125300 |
| C | 3.18769200  | -0.17560700 | -1.06430500 |

|    |             |             |             |
|----|-------------|-------------|-------------|
| H  | 2.35724500  | 1.13687900  | -2.59869100 |
| H  | 0.66727000  | -0.45517600 | -3.41040700 |
| H  | 1.92152100  | -3.33042700 | -0.42731500 |
| H  | 3.61236000  | -1.70047400 | 0.40865100  |
| Ru | 1.01082600  | -0.47515800 | -0.42289400 |
| O  | 0.70872700  | 1.57885700  | 0.04477300  |
| C  | 0.40984000  | 1.95659500  | 1.20385800  |
| O  | 0.27446400  | 1.22077800  | 2.22067100  |
| C  | 0.12956800  | 3.46517100  | 1.38079900  |
| F  | 0.90308400  | 4.18716500  | 0.56238900  |
| F  | 0.33791100  | 3.85491000  | 2.63710300  |
| F  | -1.16257000 | 3.69163700  | 1.06361900  |
| C  | 0.13986800  | -3.00455300 | -2.51608200 |
| H  | -0.79170000 | -2.47152600 | -2.72840000 |
| H  | 0.47377500  | -3.48040800 | -3.44667100 |
| H  | -0.06433500 | -3.79373400 | -1.78761300 |
| C  | 4.26859700  | 0.77004700  | -0.56198000 |
| H  | 4.33273100  | 0.62369400  | 0.52473400  |
| C  | 5.62349900  | 0.34803700  | -1.17532600 |
| H  | 5.61010200  | 0.45222700  | -2.26649600 |
| H  | 6.42230000  | 0.98813900  | -0.78708900 |
| H  | 5.87494600  | -0.69089100 | -0.93634500 |
| C  | 3.98996600  | 2.25745500  | -0.82742500 |
| H  | 3.01359200  | 2.57269300  | -0.44924400 |
| H  | 4.75783800  | 2.86201300  | -0.33476500 |
| H  | 4.03849200  | 2.49355900  | -1.89719500 |

TS3\_cf3

|   |             |             |             |
|---|-------------|-------------|-------------|
| C | 2.07925700  | -0.56322400 | 3.88986300  |
| C | 1.96286100  | 0.29188000  | 2.79140100  |
| C | 0.95401300  | 0.11204900  | 1.82654600  |
| C | 0.01491300  | -0.93655600 | 2.04638900  |
| C | 0.14445400  | -1.81052700 | 3.12874500  |
| C | 1.18538600  | -1.62528000 | 4.04454300  |
| H | 2.86732200  | -0.40768000 | 4.62115200  |
| H | 2.65743500  | 1.12237300  | 2.68966800  |
| H | 0.31874400  | 1.28319900  | 1.58545600  |
| H | -0.53168400 | -2.64909700 | 3.25753900  |
| H | 1.28925400  | -2.30686900 | 4.88345300  |
| C | -0.99075000 | -1.05831800 | 0.95810600  |
| O | -0.61476100 | -0.69621800 | -0.20364700 |
| N | -2.24835400 | -1.49350500 | 1.12825600  |
| C | -2.89315000 | -1.73113800 | 2.43054900  |
| H | -3.91099300 | -1.33963700 | 2.37460800  |

|    |             |             |             |
|----|-------------|-------------|-------------|
| H  | -2.94521200 | -2.80112200 | 2.65840800  |
| H  | -2.35866700 | -1.21071700 | 3.22467100  |
| C  | -3.10841800 | -1.63511100 | -0.03391500 |
| C  | -3.37144600 | -2.91415500 | -0.52585100 |
| C  | -3.70245400 | -0.50705900 | -0.60403300 |
| C  | -4.24125000 | -3.06607800 | -1.60768100 |
| H  | -2.90195300 | -3.77988700 | -0.06716400 |
| C  | -4.56744300 | -0.66919100 | -1.68652500 |
| H  | -3.48563400 | 0.48263300  | -0.21388200 |
| C  | -4.83863000 | -1.94532400 | -2.18714700 |
| H  | -4.45166000 | -4.05912500 | -1.99326300 |
| H  | -5.03191500 | 0.20316000  | -2.13630700 |
| H  | -5.51677700 | -2.06545400 | -3.02669800 |
| C  | 2.04837900  | 0.70439900  | -2.45106700 |
| C  | 1.90001800  | -0.67825400 | -2.25685700 |
| C  | 2.51759800  | -1.35459700 | -1.14521500 |
| C  | 3.25231600  | -0.55635600 | -0.23937800 |
| C  | 3.39369200  | 0.85728800  | -0.42016800 |
| C  | 2.79238500  | 1.50894600  | -1.52026300 |
| H  | 1.50979700  | 1.19079300  | -3.25788200 |
| H  | 1.25174200  | -1.23178500 | -2.92646400 |
| H  | 3.67556300  | -1.01742300 | 0.64710900  |
| H  | 3.92957200  | 1.44171100  | 0.32007300  |
| Ru | 1.21410600  | 0.35348000  | -0.37000200 |
| O  | -0.11266000 | 2.00331900  | -0.62461200 |
| C  | -0.65680700 | 2.56729500  | 0.35640200  |
| O  | -0.48374600 | 2.28394900  | 1.57384600  |
| C  | -1.68805300 | 3.67316800  | 0.03891000  |
| F  | -1.43162900 | 4.24422400  | -1.14096600 |
| F  | -1.69663700 | 4.60981500  | 0.98705800  |
| F  | -2.90925600 | 3.09948300  | -0.01563200 |
| C  | 2.43823200  | -2.86003400 | -0.95104700 |
| H  | 2.45357700  | -3.03744900 | 0.13238300  |
| C  | 2.87430200  | 2.99908000  | -1.70627700 |
| H  | 3.55697700  | 3.23245400  | -2.53268400 |
| H  | 1.89308200  | 3.41578600  | -1.95275900 |
| H  | 3.24898300  | 3.49550800  | -0.80722900 |
| C  | 1.16647200  | -3.50471300 | -1.52309700 |
| H  | 1.15999000  | -3.48700400 | -2.61927000 |
| H  | 1.12557800  | -4.55665000 | -1.22305400 |
| H  | 0.25864100  | -3.00826700 | -1.16736900 |
| C  | 3.70443100  | -3.51031000 | -1.55366700 |
| H  | 4.62013700  | -3.11062100 | -1.10519200 |
| H  | 3.68630200  | -4.59149300 | -1.38152200 |

|             |             |             |             |
|-------------|-------------|-------------|-------------|
| H           | 3.75479000  | -3.34328200 | -2.63590600 |
| TS4_benzene |             |             |             |
| C           | 2.71773100  | -2.67862800 | 2.32363900  |
| C           | 1.57319300  | -3.44117500 | 2.57479900  |
| C           | 0.32892500  | -3.00439300 | 2.12403300  |
| C           | 0.22191000  | -1.81404600 | 1.39685200  |
| C           | 1.36678200  | -1.03810800 | 1.07304300  |
| C           | 2.60507900  | -1.50837100 | 1.58333000  |
| H           | 3.68199400  | -2.99414200 | 2.71044000  |
| H           | 1.64352300  | -4.36721100 | 3.13763000  |
| H           | -0.55614900 | -3.59390500 | 2.33987200  |
| H           | 1.16007500  | 0.22229900  | 1.50759100  |
| H           | 3.49629200  | -0.90831300 | 1.42270600  |
| N           | -1.10990800 | -1.37036200 | 1.07777100  |
| C           | -1.45580100 | -0.99565500 | -0.17690200 |
| O           | -0.59522900 | -0.76082800 | -1.07196900 |
| C           | -2.06513400 | -1.32564400 | 2.20782800  |
| H           | -2.88915800 | -0.65882800 | 1.96004200  |
| H           | -2.46719700 | -2.31346400 | 2.44715400  |
| H           | -1.53671200 | -0.93365000 | 3.07933600  |
| C           | -2.88032300 | -0.87652400 | -0.57874500 |
| C           | -3.25683900 | 0.23072400  | -1.35690400 |
| C           | -3.82169500 | -1.87662200 | -0.28445000 |
| C           | -4.57014000 | 0.35104500  | -1.80417200 |
| H           | -2.52063400 | 0.99318400  | -1.59014200 |
| C           | -5.12728300 | -1.76225900 | -0.75681500 |
| H           | -3.52869200 | -2.75443200 | 0.28346700  |
| C           | -5.50423100 | -0.64548400 | -1.50792800 |
| H           | -4.86437100 | 1.21754300  | -2.38842500 |
| H           | -5.84892900 | -2.54442100 | -0.54208100 |
| H           | -6.52528400 | -0.55485300 | -1.86654800 |
| C           | 1.92770200  | 1.18921800  | -2.75610000 |
| C           | 1.56917500  | -0.10919000 | -3.14412400 |
| C           | 2.19326300  | -1.24641900 | -2.53039600 |
| C           | 3.19190700  | -1.05865600 | -1.55593800 |
| C           | 3.55546800  | 0.26382900  | -1.14406300 |
| C           | 2.89959200  | 1.37231600  | -1.71811400 |
| H           | 1.40219300  | 2.04703400  | -3.16037900 |
| H           | 0.75694100  | -0.26049800 | -3.84688200 |
| H           | 3.63469600  | -1.91866300 | -1.06718600 |
| H           | 4.29034100  | 0.41475200  | -0.36193900 |
| Ru          | 1.33025600  | 0.00894400  | -0.87631000 |
| O           | 0.25704600  | 1.68603600  | -0.09355300 |

|   |             |             |             |
|---|-------------|-------------|-------------|
| C | 0.26427300  | 1.98710600  | 1.12752100  |
| O | 0.78333500  | 1.31459000  | 2.05972400  |
| C | -0.49805000 | 3.27351700  | 1.52336100  |
| F | -0.43608200 | 4.18055500  | 0.54349800  |
| F | -0.00238300 | 3.80108200  | 2.64186500  |
| F | -1.78850600 | 2.94551800  | 1.72785100  |
| H | 3.10997200  | 2.37177900  | -1.35256800 |
| H | 1.86766200  | -2.24744800 | -2.78996400 |

TS4\_p-dimethylbenzene\_cf1

|   |             |             |             |
|---|-------------|-------------|-------------|
| C | 2.22577900  | -2.95723200 | 2.47152500  |
| C | 1.05081400  | -3.70799500 | 2.56049900  |
| C | -0.13720800 | -3.20944300 | 2.02929300  |
| C | -0.15701200 | -1.96900900 | 1.38096700  |
| C | 1.02987100  | -1.20740100 | 1.20323400  |
| C | 2.20238200  | -1.74065100 | 1.79889900  |
| H | 3.14255900  | -3.31538300 | 2.93028400  |
| H | 1.04966900  | -4.67054400 | 3.06333200  |
| H | -1.04881200 | -3.78996100 | 2.12572200  |
| H | 0.84053800  | 0.03924500  | 1.73065600  |
| H | 3.11108800  | -1.14716400 | 1.77035200  |
| N | -1.45206600 | -1.46859300 | 0.99796700  |
| C | -1.69363200 | -0.94734700 | -0.22926800 |
| O | -0.77014400 | -0.63504500 | -1.02976400 |
| C | -2.50273800 | -1.53372400 | 2.03889700  |
| H | -3.28908600 | -0.81755000 | 1.80702100  |
| H | -2.94540000 | -2.53008000 | 2.11798600  |
| H | -2.04657100 | -1.26912700 | 2.99498600  |
| C | -3.08428900 | -0.74625600 | -0.71573400 |
| C | -3.38996200 | 0.46251400  | -1.36206700 |
| C | -4.05328200 | -1.75946100 | -0.63444400 |
| C | -4.66314900 | 0.66632100  | -1.88876400 |
| H | -2.63157000 | 1.23579000  | -1.43211600 |
| C | -5.31671200 | -1.55872400 | -1.18668400 |
| H | -3.81311600 | -2.71131200 | -0.17020500 |
| C | -5.62516300 | -0.34402300 | -1.80505500 |
| H | -4.90369600 | 1.60932300  | -2.37013500 |
| H | -6.05860100 | -2.34988600 | -1.13743500 |
| H | -6.61394400 | -0.18715100 | -2.22589900 |
| C | 2.20264400  | 1.50647100  | -2.07732700 |
| C | 1.56065500  | 0.51679600  | -2.84774000 |
| C | 1.81754000  | -0.87081300 | -2.61671100 |
| C | 2.76944600  | -1.31383400 | -1.66797900 |
| C | 3.40824800  | -0.29863900 | -0.88002800 |

|    |             |             |             |
|----|-------------|-------------|-------------|
| C  | 3.11856600  | 1.06957000  | -1.05828600 |
| H  | 0.79920600  | 0.80291100  | -3.56511100 |
| H  | 4.10420400  | -0.59215700 | -0.10228200 |
| Ru | 1.18812300  | -0.01425700 | -0.65902000 |
| O  | 0.18098400  | 1.67586300  | 0.19662200  |
| C  | 0.16023900  | 1.89875500  | 1.43271200  |
| O  | 0.52306200  | 1.10088200  | 2.34053500  |
| C  | -0.37054900 | 3.28913000  | 1.85092500  |
| F  | 0.30207400  | 4.23897400  | 1.17786600  |
| F  | -0.22808700 | 3.49889500  | 3.15677600  |
| F  | -1.67161200 | 3.37602400  | 1.52950600  |
| H  | 3.58444300  | 1.80424600  | -0.40933100 |
| H  | 1.23698900  | -1.60680100 | -3.16439200 |
| C  | 3.10458200  | -2.77071500 | -1.50043200 |
| H  | 2.30149900  | -3.40821100 | -1.88033500 |
| H  | 4.01645400  | -3.00866800 | -2.06255000 |
| H  | 3.27992900  | -3.02389700 | -0.45154600 |
| C  | 1.88430100  | 2.96723400  | -2.22912000 |
| H  | 1.57140500  | 3.39808500  | -1.27250200 |
| H  | 2.77454300  | 3.50962800  | -2.56989700 |
| H  | 1.08451500  | 3.12834900  | -2.95583200 |

TS4\_p-dimethylbenzene\_cf2

|   |             |             |             |
|---|-------------|-------------|-------------|
| C | 1.88939400  | -2.67418000 | 3.01474700  |
| C | 0.61771800  | -3.18098100 | 3.29676300  |
| C | -0.50670600 | -2.61833000 | 2.69585400  |
| C | -0.36621300 | -1.56044100 | 1.79075900  |
| C | 0.91054400  | -1.05116300 | 1.43581600  |
| C | 2.01946200  | -1.63622000 | 2.09961900  |
| H | 2.76452000  | -3.08274700 | 3.51110000  |
| H | 0.49633600  | -4.00222100 | 3.99688600  |
| H | -1.49168000 | -3.00723500 | 2.93312500  |
| H | 0.91717400  | 0.30023900  | 1.65955900  |
| H | 3.01011500  | -1.23236000 | 1.91160000  |
| N | -1.58420900 | -0.96086700 | 1.30800300  |
| C | -1.80078200 | -0.75227500 | -0.01246900 |
| O | -0.87354600 | -0.82350800 | -0.86737200 |
| C | -2.56892700 | -0.57512000 | 2.34263300  |
| H | -3.25476400 | 0.16515300  | 1.93432400  |
| H | -3.14583900 | -1.43120600 | 2.70231200  |
| H | -2.02291100 | -0.13609600 | 3.18029900  |
| C | -3.16222400 | -0.45690800 | -0.52998700 |
| C | -3.29647700 | 0.56245600  | -1.48708400 |
| C | -4.28189300 | -1.22031000 | -0.16129100 |

|    |             |             |             |
|----|-------------|-------------|-------------|
| C  | -4.54478500 | 0.83611500  | -2.04078200 |
| H  | -2.42433800 | 1.14069500  | -1.77489900 |
| C  | -5.52265700 | -0.95807100 | -0.73848300 |
| H  | -4.17986300 | -2.03489300 | 0.54952300  |
| C  | -5.65678900 | 0.07489100  | -1.67025900 |
| H  | -4.65004400 | 1.63819400  | -2.76496400 |
| H  | -6.38322400 | -1.56039700 | -0.46392400 |
| H  | -6.62735000 | 0.28316100  | -2.11076400 |
| C  | 2.05660600  | 0.48432600  | -2.56949500 |
| C  | 1.47765500  | -0.76107600 | -2.84437600 |
| C  | 1.82876900  | -1.93599800 | -2.08770500 |
| C  | 2.79265200  | -1.79000600 | -1.06684500 |
| C  | 3.38307600  | -0.51686500 | -0.77805100 |
| C  | 3.01248800  | 0.63760100  | -1.50370500 |
| H  | 1.70844200  | 1.36596100  | -3.09793500 |
| H  | 0.68484600  | -0.82847200 | -3.58260500 |
| H  | 3.04451700  | -2.64449600 | -0.44840100 |
| H  | 4.09170600  | -0.42562600 | 0.03773200  |
| Ru | 1.14994900  | -0.33212800 | -0.64415900 |
| O  | 0.33767300  | 1.61087700  | -0.20067400 |
| C  | 0.41559400  | 2.10951200  | 0.94975100  |
| O  | 0.75000500  | 1.50426400  | 2.00646500  |
| C  | 0.10957700  | 3.62162600  | 1.04703900  |
| F  | 1.09955400  | 4.29397800  | 0.42806600  |
| F  | 0.03295900  | 4.03050700  | 2.31106400  |
| F  | -1.04570000 | 3.89378600  | 0.42514600  |
| C  | 1.16631900  | -3.25430000 | -2.37912600 |
| H  | 1.29475300  | -3.95705600 | -1.55177000 |
| H  | 0.09554200  | -3.12258500 | -2.56114500 |
| H  | 1.60779900  | -3.70289100 | -3.27791600 |
| C  | 3.57528800  | 1.99520100  | -1.18021400 |
| H  | 4.27364000  | 2.30521700  | -1.96733600 |
| H  | 2.78346200  | 2.74808000  | -1.12091200 |
| H  | 4.11835700  | 1.98687900  | -0.23140000 |

TS4\_p-dimethylbenzene\_cf3

|   |             |             |            |
|---|-------------|-------------|------------|
| C | 1.88890800  | -2.67432400 | 3.01501800 |
| C | 0.61705000  | -3.18049200 | 3.29735000 |
| C | -0.50721400 | -2.61749800 | 2.69645800 |
| C | -0.36638100 | -1.55988100 | 1.79110800 |
| C | 0.91054200  | -1.05120500 | 1.43590200 |
| C | 2.01930500  | -1.63662000 | 2.09964300 |
| H | 2.76392900  | -3.08317600 | 3.51132000 |
| H | 0.49541200  | -4.00151600 | 3.99768200 |

|    |             |             |             |
|----|-------------|-------------|-------------|
| H  | -1.49232400 | -3.00593900 | 2.93392600  |
| H  | 0.91784700  | 0.30022600  | 1.65934100  |
| H  | 3.01011400  | -1.23324300 | 1.91140500  |
| N  | -1.58418800 | -0.95998000 | 1.30824700  |
| C  | -1.80087100 | -0.75218500 | -0.01233700 |
| O  | -0.87369700 | -0.82432000 | -0.86723900 |
| C  | -2.56850600 | -0.57314900 | 2.34284100  |
| H  | -3.25429600 | 0.16693800  | 1.93412300  |
| H  | -3.14550400 | -1.42880700 | 2.70339800  |
| H  | -2.02214600 | -0.13356100 | 3.17999200  |
| C  | -3.16226200 | -0.45676100 | -0.52993300 |
| C  | -3.29621500 | 0.56174000  | -1.48799500 |
| C  | -4.28221800 | -1.21930600 | -0.16033300 |
| C  | -4.54448000 | 0.83541700  | -2.04177400 |
| H  | -2.42386400 | 1.13931400  | -1.77649300 |
| C  | -5.52295300 | -0.95707100 | -0.73758900 |
| H  | -4.18044700 | -2.03325400 | 0.55124500  |
| C  | -5.65676700 | 0.07504800  | -1.67034600 |
| H  | -4.64949200 | 1.63684100  | -2.76671700 |
| H  | -6.38374700 | -1.55874700 | -0.46231800 |
| H  | -6.62730300 | 0.28332400  | -2.11090400 |
| C  | 1.47738000  | -0.76159700 | -2.84435200 |
| C  | 1.82870800  | -1.93637000 | -2.08755500 |
| C  | 2.79262800  | -1.79011200 | -1.06676900 |
| C  | 3.38288000  | -0.51684600 | -0.77816100 |
| C  | 3.01210000  | 0.63746600  | -1.50396100 |
| C  | 2.05617800  | 0.48391400  | -2.56967100 |
| H  | 0.68454200  | -0.82920300 | -3.58253100 |
| H  | 4.09150800  | -0.42537900 | 0.03760200  |
| Ru | 1.14974900  | -0.33244800 | -0.64419300 |
| O  | 0.33713600  | 1.61046900  | -0.20066700 |
| C  | 0.41601100  | 2.10938100  | 0.94957500  |
| O  | 0.75130200  | 1.50435200  | 2.00613400  |
| C  | 0.11026400  | 3.62156000  | 1.04677500  |
| F  | 1.09988500  | 4.29363300  | 0.42689800  |
| F  | 0.03469900  | 4.03071400  | 2.31077300  |
| F  | -1.04542800 | 3.89382300  | 0.42571300  |
| H  | 1.70786600  | 1.36542800  | -3.09821500 |
| H  | 3.04464600  | -2.64449300 | -0.44823600 |
| C  | 3.57478300  | 1.99517700  | -1.18073600 |
| H  | 4.27286900  | 2.30521600  | -1.96808500 |
| H  | 2.78288300  | 2.74796200  | -1.12129600 |
| H  | 4.11812200  | 1.98700800  | -0.23207700 |
| C  | 1.16633600  | -3.25477100 | -2.37870700 |



|   |            |             |             |
|---|------------|-------------|-------------|
| H | 1.60735200 | -3.70320000 | -3.27780400 |
| H | 1.29538400 | -3.95757900 | -1.55149300 |
| H | 0.09542600 | -3.12321000 | -2.56006000 |

TS4\_cf2

|    |             |             |             |
|----|-------------|-------------|-------------|
| C  | 0.85793600  | -3.43101000 | 2.79734100  |
| C  | -0.48143400 | -3.83040900 | 2.77656300  |
| C  | -1.43220000 | -3.04948100 | 2.12251300  |
| C  | -1.04796600 | -1.87684000 | 1.46126100  |
| C  | 0.31149300  | -1.47150800 | 1.40039700  |
| C  | 1.23269700  | -2.27912400 | 2.11597100  |
| H  | 1.59459200  | -4.01088200 | 3.34533900  |
| H  | -0.79271000 | -4.73713300 | 3.28678200  |
| H  | -2.47329200 | -3.35546500 | 2.13241800  |
| H  | 0.39583200  | -0.17958800 | 1.85522800  |
| H  | 2.27104900  | -1.96330800 | 2.16065800  |
| N  | -2.10999600 | -1.05602600 | 0.93869500  |
| C  | -2.07640400 | -0.53931600 | -0.31244500 |
| O  | -1.03474800 | -0.54652300 | -1.02543600 |
| C  | -3.22968400 | -0.78233500 | 1.86791700  |
| H  | -3.74966800 | 0.12120100  | 1.55464400  |
| H  | -3.94525400 | -1.60794300 | 1.90459400  |
| H  | -2.81068000 | -0.62803300 | 2.86414000  |
| C  | -3.29449700 | 0.05010200  | -0.92982300 |
| C  | -3.16708500 | 1.28511800  | -1.58608500 |
| C  | -4.52274100 | -0.63002600 | -0.95002700 |
| C  | -4.26906100 | 1.84797400  | -2.22577000 |
| H  | -2.21134600 | 1.79943300  | -1.57233100 |
| C  | -5.61368800 | -0.07316500 | -1.61448900 |
| H  | -4.61881100 | -1.60158300 | -0.47432900 |
| C  | -5.49018100 | 1.16848600  | -2.24397500 |
| H  | -4.17471200 | 2.81260600  | -2.71506400 |
| H  | -6.55811900 | -0.60797900 | -1.64306300 |
| H  | -6.34521300 | 1.60420200  | -2.75240700 |
| C  | 3.11742700  | 0.20028200  | -0.98961100 |
| C  | 2.28943700  | 0.34335400  | -2.15580800 |
| C  | 1.53932900  | -0.73519000 | -2.64704400 |
| C  | 1.57983900  | -2.03028200 | -2.02007600 |
| C  | 2.39995900  | -2.17096000 | -0.87956800 |
| C  | 3.15607500  | -1.06929500 | -0.36694300 |
| H  | 2.17278900  | 1.31856800  | -2.61279900 |
| H  | 2.40826400  | -3.11512900 | -0.34615200 |
| Ru | 0.98306700  | -0.49547300 | -0.47338600 |
| O  | 0.40715600  | 1.47435200  | 0.18414300  |

|   |             |             |             |
|---|-------------|-------------|-------------|
| C | 0.21526700  | 1.75977300  | 1.39076400  |
| O | 0.25074100  | 0.95722000  | 2.36650200  |
| C | -0.15886400 | 3.22896200  | 1.69354900  |
| F | 0.56784900  | 4.06189900  | 0.93583200  |
| F | 0.03134900  | 3.52894900  | 2.97662000  |
| F | -1.46010700 | 3.39999700  | 1.39120800  |
| H | 3.75372100  | -1.20027600 | 0.52891100  |
| H | 0.85117500  | -0.57153800 | -3.47050800 |
| C | 0.75839200  | -3.16819300 | -2.56072700 |
| H | -0.22982100 | -2.82334400 | -2.87928400 |
| H | 1.25848400  | -3.60607600 | -3.43380500 |
| H | 0.62892100  | -3.95724400 | -1.81515300 |
| C | 3.97916200  | 1.33273700  | -0.45120700 |
| H | 3.98733600  | 1.23201400  | 0.64247400  |
| C | 5.42816800  | 1.12583800  | -0.95179800 |
| H | 6.07734000  | 1.90257700  | -0.53503100 |
| H | 5.82954100  | 0.15180000  | -0.65269000 |
| H | 5.48045600  | 1.19466500  | -2.04455900 |
| C | 3.48003900  | 2.74274600  | -0.79939200 |
| H | 2.44629300  | 2.90660500  | -0.48515100 |
| H | 4.10859100  | 3.48244700  | -0.29376100 |
| H | 3.55478000  | 2.94497400  | -1.87452300 |

TS4\_cf3

|   |             |             |             |
|---|-------------|-------------|-------------|
| C | 2.41290800  | -1.50370800 | 3.24040500  |
| C | 1.52495000  | -2.57345000 | 3.37627800  |
| C | 0.33000000  | -2.58222100 | 2.65875300  |
| C | 0.02554700  | -1.53547100 | 1.78142500  |
| C | 0.93188400  | -0.46328400 | 1.56063100  |
| C | 2.11396400  | -0.48274700 | 2.34478000  |
| H | 3.32130300  | -1.46562700 | 3.83422500  |
| H | 1.74764900  | -3.39064800 | 4.05594900  |
| H | -0.36433500 | -3.40617100 | 2.78806400  |
| H | 0.28094900  | 0.71272200  | 1.82234700  |
| H | 2.79336600  | 0.36156800  | 2.27951400  |
| N | -1.28880800 | -1.55652000 | 1.19259400  |
| C | -1.47951400 | -1.38557800 | -0.13795700 |
| O | -0.57581100 | -0.93880000 | -0.89678800 |
| C | -2.41447000 | -1.74966900 | 2.13326300  |
| H | -3.33750000 | -1.40303100 | 1.67185000  |
| H | -2.53624000 | -2.79657500 | 2.42326900  |
| H | -2.21352900 | -1.15405800 | 3.02638200  |
| C | -2.76767900 | -1.75533800 | -0.78046800 |
| C | -3.30706100 | -0.87644600 | -1.73398200 |

|           |             |             |             |
|-----------|-------------|-------------|-------------|
| C         | -3.39804700 | -2.98507800 | -0.52957300 |
| C         | -4.48341900 | -1.21032900 | -2.40060300 |
| H         | -2.80690800 | 0.06612300  | -1.93190500 |
| C         | -4.56102900 | -3.32375900 | -1.21797900 |
| H         | -2.96650200 | -3.68726000 | 0.17741400  |
| C         | -5.10908400 | -2.43378500 | -2.14568700 |
| H         | -4.90963000 | -0.52044600 | -3.12257900 |
| H         | -5.03737700 | -4.28178000 | -1.03345300 |
| H         | -6.02108300 | -2.69658300 | -2.67354200 |
| C         | 1.56117200  | 1.99882300  | -2.05239800 |
| C         | 1.44421700  | 0.74062000  | -2.67449000 |
| C         | 2.14529100  | -0.39824100 | -2.16628800 |
| C         | 3.03660200  | -0.30903600 | -1.07080200 |
| C         | 3.13147500  | 0.97422900  | -0.43274900 |
| C         | 2.40142600  | 2.09058000  | -0.88909200 |
| H         | 0.74824300  | 0.61064700  | -3.49612000 |
| H         | 3.75480500  | 1.08063600  | 0.44838700  |
| Ru        | 0.95343200  | 0.42501800  | -0.47160800 |
| O         | -0.70201200 | 1.72628400  | -0.04167800 |
| C         | -0.95293000 | 2.12605500  | 1.12238100  |
| O         | -0.45347200 | 1.67425800  | 2.18991400  |
| C         | -1.95698700 | 3.29689600  | 1.22207300  |
| F         | -1.45998100 | 4.34896500  | 0.54494900  |
| F         | -2.17462300 | 3.65676400  | 2.48400000  |
| F         | -3.12044400 | 2.93684900  | 0.65930900  |
| H         | 2.46327200  | 3.02955100  | -0.34824800 |
| H         | 1.94988200  | -1.36395200 | -2.61851900 |
| C         | 3.89123600  | -1.46974200 | -0.59337100 |
| H         | 4.03468400  | -1.33375300 | 0.48573100  |
| C         | 0.76816800  | 3.19136300  | -2.50705500 |
| H         | 0.20650400  | 3.62624600  | -1.67418700 |
| H         | 1.44486000  | 3.96136400  | -2.89743200 |
| H         | 0.06129700  | 2.92419800  | -3.29628500 |
| C         | 5.27851200  | -1.38541200 | -1.26900900 |
| H         | 5.93086900  | -2.17528700 | -0.88247700 |
| H         | 5.19559000  | -1.51678000 | -2.35405700 |
| H         | 5.76691700  | -0.42289100 | -1.08091100 |
| C         | 3.25130000  | -2.84825200 | -0.80954200 |
| H         | 3.87404200  | -3.61807600 | -0.34329300 |
| H         | 2.25244600  | -2.90259000 | -0.36404600 |
| H         | 3.17226300  | -3.10197300 | -1.87305100 |
| TS3_outer |             |             |             |
| C         | 0.34564200  | 2.16501200  | 3.93087300  |

|   |             |             |             |
|---|-------------|-------------|-------------|
| C | 0.89128000  | 1.72478400  | 2.72683500  |
| C | 0.13769100  | 0.99550300  | 1.78607900  |
| C | -1.20059800 | 0.68924000  | 2.13333700  |
| C | -1.75607900 | 1.13320100  | 3.33982200  |
| C | -0.98470500 | 1.87142300  | 4.23808200  |
| H | 0.95882100  | 2.71827700  | 4.63699000  |
| H | 1.94521500  | 1.88913300  | 2.52283700  |
| H | 0.98305100  | 0.27007600  | 1.20736900  |
| H | -2.79893600 | 0.92981300  | 3.56584600  |
| H | -1.42116300 | 2.21132600  | 5.17316500  |
| C | -2.07619300 | 0.13347500  | 1.06762600  |
| O | -1.93945100 | 0.61479100  | -0.09742600 |
| N | -3.06920400 | -0.73467600 | 1.32563400  |
| C | -3.05995300 | -1.63578500 | 2.48776000  |
| H | -2.99259000 | -2.66622300 | 2.12786800  |
| H | -3.97984300 | -1.51780300 | 3.06986400  |
| H | -2.19263100 | -1.43446500 | 3.11315800  |
| C | -3.97748800 | -1.09782000 | 0.25847200  |
| C | -5.22872500 | -0.48286600 | 0.19749900  |
| C | -3.61852800 | -2.08491800 | -0.66300200 |
| C | -6.13197900 | -0.85497800 | -0.80030700 |
| H | -5.48778600 | 0.27996800  | 0.92653000  |
| C | -4.52675800 | -2.44915500 | -1.65752300 |
| H | -2.63781900 | -2.54407400 | -0.60585600 |
| C | -5.78160300 | -1.83820900 | -1.72749800 |
| H | -7.10696700 | -0.37809100 | -0.85020300 |
| H | -4.24839600 | -3.21040600 | -2.38067400 |
| H | -6.48485600 | -2.12775400 | -2.50353700 |
| C | 0.24241200  | 2.12706800  | -2.58390400 |
| C | -0.77890500 | 2.85891900  | -1.94134900 |
| C | -0.53499800 | 3.58530000  | -0.72351800 |
| C | 0.75543300  | 3.46941200  | -0.16652600 |
| C | 1.79145200  | 2.69911400  | -0.79499000 |
| C | 1.56343600  | 2.02934800  | -2.01751600 |
| H | -0.00393500 | 1.52707900  | -3.45323200 |
| H | -1.78873700 | 2.81872000  | -2.33896500 |
| H | 0.94993300  | 3.90608100  | 0.80724200  |
| H | 2.73075600  | 2.56133900  | -0.27451700 |
| C | 2.59228000  | 1.14871600  | -2.70541600 |
| H | 2.08011600  | 0.20005400  | -2.91226700 |
| C | 2.99667000  | 1.79382200  | -4.04930100 |
| H | 2.13351600  | 1.98765300  | -4.69657700 |
| H | 3.67595600  | 1.12550400  | -4.58882100 |
| H | 3.51860500  | 2.74480200  | -3.88711100 |

|    |             |             |             |
|----|-------------|-------------|-------------|
| C  | 3.82455800  | 0.83155500  | -1.84961800 |
| H  | 4.47449600  | 0.14160600  | -2.39790600 |
| H  | 3.54908000  | 0.35208200  | -0.90636300 |
| H  | 4.41525100  | 1.73363700  | -1.64075500 |
| C  | -1.63037000 | 4.37206200  | -0.05551400 |
| H  | -2.60035000 | 3.88125200  | -0.18236800 |
| H  | -1.70185100 | 5.37533300  | -0.49519000 |
| H  | -1.43931300 | 4.48498000  | 1.01545900  |
| Ru | 0.00311200  | 1.39329800  | -0.50413300 |
| O  | 2.47434500  | -1.07227000 | 3.08618400  |
| C  | 2.74864900  | -1.07115500 | 1.89370700  |
| O  | 2.25208600  | -0.36836400 | 0.93443900  |
| C  | 3.84971300  | -2.03413400 | 1.36679000  |
| F  | 4.41336400  | -2.75740300 | 2.34567800  |
| F  | 3.34065300  | -2.89653200 | 0.45736400  |
| F  | 4.84291600  | -1.34292400 | 0.74877800  |
| O  | -0.42311300 | -1.88249000 | 0.46926200  |
| C  | 0.10490600  | -1.65163500 | -0.61308900 |
| O  | 0.33739500  | -0.53505300 | -1.20413800 |
| C  | 0.49086000  | -2.86739700 | -1.49760900 |
| F  | 0.95513100  | -3.88321500 | -0.76330500 |
| F  | -0.63013400 | -3.30277900 | -2.13935300 |
| F  | 1.40242500  | -2.57654800 | -2.44220100 |

TS4\_outer

|   |             |             |             |
|---|-------------|-------------|-------------|
| C | -0.42360800 | 1.17084900  | 4.16671700  |
| C | 0.83181300  | 0.66453000  | 4.52414400  |
| C | 1.60762400  | 0.00221400  | 3.57615200  |
| C | 1.14484600  | -0.14123900 | 2.26292200  |
| C | -0.09041200 | 0.40304200  | 1.84670300  |
| C | -0.86198200 | 1.03606600  | 2.85639500  |
| H | -1.05403200 | 1.64630500  | 4.91336300  |
| H | 1.19607300  | 0.76684400  | 5.54277900  |
| H | 2.57231400  | -0.41334300 | 3.85285200  |
| H | -0.86149400 | -0.28591700 | 1.12239500  |
| H | -1.85831200 | 1.37958200  | 2.59281100  |
| N | 1.96649100  | -0.93744800 | 1.39268000  |
| C | 2.45876600  | -0.43610600 | 0.24817300  |
| O | 2.11259800  | 0.69035300  | -0.21475200 |
| C | 1.99497100  | -2.38201500 | 1.71942600  |
| H | 2.34950600  | -2.93688900 | 0.85374800  |
| H | 2.64514800  | -2.57446300 | 2.57902200  |
| H | 0.96868300  | -2.68622200 | 1.94322200  |
| C | 3.57914600  | -1.12863100 | -0.45235500 |

|    |             |             |             |
|----|-------------|-------------|-------------|
| C  | 3.57372100  | -1.19626800 | -1.85248600 |
| C  | 4.68369800  | -1.61401000 | 0.26175000  |
| C  | 4.65164600  | -1.76632300 | -2.52552400 |
| H  | 2.71086100  | -0.82803200 | -2.39423700 |
| C  | 5.76801100  | -2.16979400 | -0.41688700 |
| H  | 4.70114200  | -1.54271600 | 1.34533400  |
| C  | 5.75035900  | -2.25168700 | -1.81057100 |
| H  | 4.63385800  | -1.83530500 | -3.60947600 |
| H  | 6.62398800  | -2.53742900 | 0.14198900  |
| H  | 6.59099700  | -2.69288500 | -2.33922400 |
| C  | -0.17180600 | 3.04094700  | -1.76248600 |
| C  | 1.03714300  | 3.38968900  | -1.13043100 |
| C  | 1.09427800  | 3.66140500  | 0.28271100  |
| C  | -0.10532900 | 3.53647100  | 1.00925000  |
| C  | -1.33341800 | 3.15073500  | 0.37020700  |
| C  | -1.39646300 | 2.89888300  | -1.01713100 |
| H  | -0.15869600 | 2.75030300  | -2.80779000 |
| H  | 1.95972600  | 3.37285900  | -1.70256300 |
| H  | -0.08731600 | 3.64754100  | 2.08765900  |
| H  | -2.21274900 | 2.98881100  | 0.98056800  |
| C  | -2.64814300 | 2.42475100  | -1.73480800 |
| H  | -2.31243300 | 1.66722500  | -2.45282400 |
| C  | -3.26392500 | 3.60582200  | -2.51564400 |
| H  | -2.54291000 | 4.06667200  | -3.20119100 |
| H  | -4.11556100 | 3.25635400  | -3.10893800 |
| H  | -3.62512800 | 4.38458700  | -1.83273900 |
| C  | -3.68261400 | 1.74688000  | -0.82659700 |
| H  | -4.51131600 | 1.38093600  | -1.44173400 |
| H  | -3.25768000 | 0.88504300  | -0.30313100 |
| H  | -4.11140400 | 2.44509300  | -0.09557200 |
| C  | 2.40302400  | 4.00054600  | 0.94280900  |
| H  | 3.20745200  | 3.36854200  | 0.55363400  |
| H  | 2.66998000  | 5.04696200  | 0.74698600  |
| H  | 2.34813500  | 3.85985700  | 2.02589600  |
| Ru | 0.20851700  | 1.60586800  | -0.10497000 |
| O  | -1.24332300 | -2.71191000 | 2.11756500  |
| C  | -2.04562600 | -2.17883500 | 1.35715100  |
| O  | -1.96770000 | -1.05302800 | 0.74009700  |
| C  | -3.38902800 | -2.89988600 | 1.05550500  |
| F  | -3.56949400 | -3.06237400 | -0.27176500 |
| F  | -4.43205200 | -2.16998000 | 1.52042500  |
| F  | -3.45358400 | -4.11063300 | 1.63055300  |
| O  | -0.50809000 | 0.14123000  | -1.39586400 |
| C  | -0.29933500 | -1.12118100 | -1.52287100 |

|   |             |             |             |
|---|-------------|-------------|-------------|
| O | 0.58132900  | -1.83336800 | -1.05826200 |
| C | -1.31243300 | -1.75506000 | -2.51564700 |
| F | -1.50325000 | -3.05363200 | -2.26066900 |
| F | -0.81328200 | -1.64900200 | -3.77639900 |
| F | -2.51023800 | -1.14252400 | -2.51021800 |

TS5

|   |             |             |             |
|---|-------------|-------------|-------------|
| C | -0.40304000 | -2.68341200 | 3.47359600  |
| C | -0.97648200 | -1.76680400 | 2.58965200  |
| C | -0.20314300 | -1.09524400 | 1.62295100  |
| C | 1.19456000  | -1.36880200 | 1.60296600  |
| C | 1.77012800  | -2.29335800 | 2.47816400  |
| C | 0.96699600  | -2.95274800 | 3.41213100  |
| H | -1.01985900 | -3.18573800 | 4.21314200  |
| H | -2.03652500 | -1.54108200 | 2.67469300  |
| H | -0.48113500 | 0.21035000  | 1.69832000  |
| H | 2.82814600  | -2.53987600 | 2.42492800  |
| H | 1.41189200  | -3.67389900 | 4.09092300  |
| C | 1.93600000  | -0.64309700 | 0.54768800  |
| O | 1.28363100  | -0.20223700 | -0.44748100 |
| N | 3.25795500  | -0.45319200 | 0.67173300  |
| C | 4.19198900  | 0.18123000  | -0.19686500 |
| C | 5.54117200  | 0.08753600  | 0.17443000  |
| C | 3.82418000  | 0.87861800  | -1.35524400 |
| C | 6.52269900  | 0.68423700  | -0.61096200 |
| H | 5.82294100  | -0.45317600 | 1.07576100  |
| C | 4.82182800  | 1.46959400  | -2.13190500 |
| H | 2.78427100  | 0.96624700  | -1.63499000 |
| C | 6.16642600  | 1.37724200  | -1.77024300 |
| H | 7.56438600  | 0.60690000  | -0.31525800 |
| H | 4.53717500  | 2.01376900  | -3.02755500 |
| H | 6.93083600  | 1.84411100  | -2.38344800 |
| C | -2.03673200 | -0.35418400 | -2.34754900 |
| C | -0.94932100 | -1.19964700 | -2.61224500 |
| C | -0.71307600 | -2.38186700 | -1.82100500 |
| C | -1.60800200 | -2.64550800 | -0.76382300 |
| C | -2.70094000 | -1.76207800 | -0.47520200 |
| C | -2.93809800 | -0.60628400 | -1.25307500 |
| H | -2.13691500 | 0.57049200  | -2.90708000 |
| H | -0.23723700 | -0.92798900 | -3.38523900 |
| H | -1.42749100 | -3.49260200 | -0.11071500 |
| H | -3.32213700 | -1.96575000 | 0.38834900  |
| C | -4.06463900 | 0.37784400  | -0.98383900 |
| H | -3.63901500 | 1.37966000  | -1.12790200 |

|    |             |             |             |
|----|-------------|-------------|-------------|
| C  | -5.17741700 | 0.17408000  | -2.03656500 |
| H  | -4.79717200 | 0.26898400  | -3.05944700 |
| H  | -5.95993100 | 0.92701600  | -1.89931100 |
| H  | -5.63752700 | -0.81557900 | -1.93543400 |
| C  | -4.63428300 | 0.31141200  | 0.43941200  |
| H  | -5.36187700 | 1.11646500  | 0.57869200  |
| H  | -3.85499500 | 0.43503500  | 1.19998400  |
| H  | -5.15972500 | -0.63248100 | 0.62747800  |
| C  | 0.46204900  | -3.27308200 | -2.11525500 |
| H  | 1.34897100  | -2.68563100 | -2.37174300 |
| H  | 0.23184500  | -3.91913200 | -2.97177800 |
| H  | 0.70066400  | -3.91599200 | -1.26381000 |
| Ru | -0.81341400 | -0.57047500 | -0.45463000 |
| O  | -0.93776200 | 1.52987200  | -0.20822700 |
| C  | -0.84029000 | 2.06596100  | 0.92734300  |
| O  | -0.59474800 | 1.47504200  | 2.01083400  |
| C  | -1.09821800 | 3.58976700  | 0.96162400  |
| F  | -2.38800000 | 3.80931400  | 0.64435600  |
| F  | -0.85520100 | 4.10197600  | 2.16588300  |
| F  | -0.32357800 | 4.20232900  | 0.05722400  |
| H  | 3.66088000  | -0.78928100 | 1.53780800  |

TS6

|   |             |             |             |
|---|-------------|-------------|-------------|
| C | 0.78542400  | -2.47373200 | 3.48742000  |
| C | -0.52557100 | -2.94917300 | 3.61120100  |
| C | -1.53102900 | -2.45477300 | 2.78517800  |
| C | -1.22803400 | -1.49344100 | 1.81231500  |
| C | 0.09324700  | -1.00860900 | 1.62650700  |
| C | 1.07342600  | -1.52309700 | 2.51558200  |
| H | 1.56228700  | -2.83266100 | 4.15553100  |
| H | -0.77070700 | -3.69025800 | 4.36612800  |
| H | -2.55230600 | -2.81071700 | 2.90170100  |
| H | 0.06151700  | 0.33491500  | 1.70776700  |
| H | 2.08367100  | -1.12723100 | 2.45092300  |
| N | -2.32633400 | -0.97264800 | 1.08727600  |
| C | -2.33742400 | -0.25419700 | -0.05937800 |
| O | -1.29997600 | 0.01738400  | -0.71626700 |
| C | -3.64841900 | 0.22922800  | -0.55723200 |
| C | -3.66208000 | 1.36649300  | -1.38172700 |
| C | -4.85896900 | -0.41346700 | -0.24273100 |
| C | -4.86980500 | 1.86660500  | -1.86076500 |
| H | -2.72513800 | 1.85486900  | -1.62627800 |
| C | -6.06269200 | 0.08571100  | -0.73385100 |
| H | -4.87433900 | -1.32833300 | 0.34496400  |



|    |             |             |             |
|----|-------------|-------------|-------------|
| C  | -6.07050700 | 1.22948000  | -1.53670200 |
| H  | -4.87525600 | 2.75443200  | -2.48550800 |
| H  | -6.99258900 | -0.42189800 | -0.49715200 |
| H  | -7.01130200 | 1.61941500  | -1.91354100 |
| C  | 1.82903200  | -0.49690700 | -2.44191200 |
| C  | 0.76239500  | -1.40423200 | -2.53830800 |
| C  | 0.61216700  | -2.49905600 | -1.61790100 |
| C  | 1.57784300  | -2.61011900 | -0.59238700 |
| C  | 2.65664200  | -1.67809300 | -0.47119400 |
| C  | 2.79523200  | -0.60465300 | -1.38390700 |
| H  | 1.87201500  | 0.35249000  | -3.11562700 |
| H  | -0.01015500 | -1.23473100 | -3.28258400 |
| H  | 1.46585000  | -3.38287300 | 0.16106700  |
| H  | 3.34550100  | -1.77793700 | 0.35806300  |
| C  | 3.91451800  | 0.41812700  | -1.30427400 |
| H  | 3.49040500  | 1.37022100  | -1.64685600 |
| C  | 5.02699500  | 0.00605500  | -2.29664100 |
| H  | 4.64542300  | -0.10392100 | -3.31744600 |
| H  | 5.81030300  | 0.77047400  | -2.31036200 |
| H  | 5.48577700  | -0.94426000 | -2.00048700 |
| C  | 4.48195900  | 0.63907000  | 0.10389300  |
| H  | 5.22877300  | 1.43827800  | 0.07191800  |
| H  | 3.70253900  | 0.94256700  | 0.80989500  |
| H  | 4.98576100  | -0.25387800 | 0.49235100  |
| C  | -0.52099200 | -3.48010400 | -1.75763400 |
| H  | -1.42591100 | -2.99351400 | -2.13411900 |
| H  | -0.24786600 | -4.26698900 | -2.47192700 |
| H  | -0.75283800 | -3.96090000 | -0.80312100 |
| Ru | 0.71084000  | -0.55721400 | -0.44733800 |
| O  | 1.01076900  | 1.52296200  | -0.09456700 |
| C  | 0.59281600  | 2.11589100  | 0.93094900  |
| O  | -0.01556900 | 1.58917500  | 1.90363300  |
| C  | 0.92833500  | 3.62104000  | 1.03438100  |
| F  | 2.17415100  | 3.73933300  | 1.53022800  |
| F  | 0.07720200  | 4.25190300  | 1.84355700  |
| F  | 0.89144000  | 4.19487200  | -0.17387300 |
| H  | -3.22804700 | -1.09702300 | 1.52977100  |

TS5\_no\_H

|   |             |            |            |
|---|-------------|------------|------------|
| C | -0.26969700 | 4.09185000 | 2.03258400 |
| C | -0.79304400 | 2.96007700 | 1.40814300 |
| C | 0.01112800  | 1.82322400 | 1.16528000 |
| C | 1.36308600  | 1.87698900 | 1.57384800 |
| C | 1.89053500  | 3.00230700 | 2.20691200 |

|    |             |             |             |
|----|-------------|-------------|-------------|
| C  | 1.07410400  | 4.11225100  | 2.42922200  |
| H  | -0.90519700 | 4.95301500  | 2.22429700  |
| H  | -1.84871800 | 2.93666300  | 1.14214200  |
| H  | -0.62663400 | 0.77222900  | 1.75781700  |
| H  | 2.93395400  | 2.98761500  | 2.50797000  |
| H  | 1.47867000  | 4.99360600  | 2.92068300  |
| C  | 2.24148900  | 0.69507300  | 1.27989000  |
| C  | -0.69776300 | -0.44283000 | -2.55734600 |
| C  | 0.63351400  | -0.00812900 | -2.61751500 |
| C  | 0.98631300  | 1.34317900  | -2.27073500 |
| C  | -0.06457400 | 2.20517900  | -1.87867700 |
| C  | -1.43257600 | 1.77248700  | -1.85495100 |
| C  | -1.76781200 | 0.44323900  | -2.16641600 |
| H  | -0.92103300 | -1.49075600 | -2.73161000 |
| H  | 1.41955800  | -0.72317800 | -2.83616500 |
| H  | 0.17243200  | 3.21114600  | -1.54849300 |
| H  | -2.19365300 | 2.46425200  | -1.51510700 |
| C  | -3.18391200 | -0.10682200 | -2.10788100 |
| H  | -3.10275900 | -1.11756100 | -1.68658800 |
| C  | -3.75097100 | -0.23191700 | -3.53850500 |
| H  | -3.10555900 | -0.84229000 | -4.17971900 |
| H  | -4.74141400 | -0.69965100 | -3.51412200 |
| H  | -3.85314200 | 0.75512200  | -4.00526600 |
| C  | -4.13518100 | 0.69386600  | -1.20921000 |
| H  | -5.09626200 | 0.17491000  | -1.13265400 |
| H  | -3.73235900 | 0.80672600  | -0.19727100 |
| H  | -4.33785300 | 1.69237600  | -1.61533500 |
| C  | 2.41833500  | 1.80269700  | -2.32293900 |
| H  | 3.09597200  | 1.00501200  | -2.00548500 |
| H  | 2.68643600  | 2.08623400  | -3.34919200 |
| H  | 2.58111300  | 2.67075800  | -1.67799800 |
| Ru | -0.11936700 | 0.44352400  | -0.53251900 |
| O  | -1.14782500 | -1.15179400 | 0.49649400  |
| C  | -1.42286900 | -1.07423500 | 1.71580400  |
| O  | -1.18880900 | -0.10091300 | 2.48333000  |
| C  | -2.15599200 | -2.29619600 | 2.30893300  |
| F  | -3.37175200 | -2.40580800 | 1.73465000  |
| F  | -2.32045500 | -2.19336300 | 3.62942200  |
| F  | -1.46600000 | -3.41762000 | 2.04527000  |
| N  | 1.63488300  | -0.20330100 | 0.43840200  |
| O  | 3.37023200  | 0.60296100  | 1.77240800  |
| C  | 2.34479200  | -1.33479700 | -0.03903100 |
| C  | 3.72328100  | -1.29834500 | -0.33585900 |
| C  | 1.64671500  | -2.53425100 | -0.27904400 |

|   |            |             |             |
|---|------------|-------------|-------------|
| C | 4.36296700 | -2.41772300 | -0.86868200 |
| H | 4.28902500 | -0.40272400 | -0.11526000 |
| C | 2.29570400 | -3.64631500 | -0.81436400 |
| H | 0.59367900 | -2.58893800 | -0.02717400 |
| C | 3.65808000 | -3.59693500 | -1.11842800 |
| H | 5.42702400 | -2.36427400 | -1.08709500 |
| H | 1.73197900 | -4.56094500 | -0.98336500 |
| H | 4.16384800 | -4.46575100 | -1.53110900 |

TS6\_no\_H

|   |             |             |             |
|---|-------------|-------------|-------------|
| C | -0.19647900 | 4.69069500  | -0.39963500 |
| C | 0.57653100  | 3.60740900  | 0.01895200  |
| C | 0.13142200  | 2.29370600  | -0.22441500 |
| C | -1.15973900 | 2.09570000  | -0.79234700 |
| C | -1.95953100 | 3.18005300  | -1.19542300 |
| C | -1.44480400 | 4.46375500  | -1.00271800 |
| H | 0.16558700  | 5.70734700  | -0.26977700 |
| H | 1.55265000  | 3.78129500  | 0.47060700  |
| H | 1.13316700  | 1.76788100  | -1.12129200 |
| H | -2.94279200 | 3.01699200  | -1.61375200 |
| H | -2.03861500 | 5.31758300  | -1.32211800 |
| C | 0.19438400  | -1.49455000 | 2.10106700  |
| C | -1.06821500 | -0.89396200 | 2.19090100  |
| C | -1.20633400 | 0.50768200  | 2.49343800  |
| C | -0.01607700 | 1.24816700  | 2.70344200  |
| C | 1.27877100  | 0.63730900  | 2.62990900  |
| C | 1.39955900  | -0.72542200 | 2.28482300  |
| H | 0.26893000  | -2.52952800 | 1.78420600  |
| H | -1.95346900 | -1.47360500 | 1.95100300  |
| H | -0.08453100 | 2.31728300  | 2.87601000  |
| H | 2.16074800  | 1.25372700  | 2.75137200  |
| C | 2.73811200  | -1.42891700 | 2.11525300  |
| H | 2.62743400  | -2.09548700 | 1.24976900  |
| C | 3.02047300  | -2.30414600 | 3.35555100  |
| H | 2.20753900  | -3.01302800 | 3.54698100  |
| H | 3.94251700  | -2.87838700 | 3.21218400  |
| H | 3.14348000  | -1.68315300 | 4.25099600  |
| C | 3.91874100  | -0.49194700 | 1.82863600  |
| H | 4.81613500  | -1.08376000 | 1.62008600  |
| H | 3.72832300  | 0.14595900  | 0.95975500  |
| H | 4.14771700  | 0.15132300  | 2.68688000  |
| C | -2.56378700 | 1.15386000  | 2.58386100  |
| H | -3.26309800 | 0.71258700  | 1.86798000  |
| H | -2.98183300 | 1.02129200  | 3.59043000  |

|    |             |             |             |
|----|-------------|-------------|-------------|
| H  | -2.50405500 | 2.22637600  | 2.37853800  |
| Ru | 0.11345600  | 0.34783000  | 0.70876400  |
| O  | 1.27675300  | -0.58832800 | -0.86484500 |
| C  | 1.86692200  | 0.05147000  | -1.75711800 |
| O  | 1.86310100  | 1.31000100  | -1.93169700 |
| C  | 2.75647000  | -0.76837900 | -2.71509700 |
| F  | 3.93419300  | -1.01621200 | -2.10357400 |
| F  | 2.99969200  | -0.11634500 | -3.85470100 |
| F  | 2.17853800  | -1.94276300 | -3.00417400 |
| N  | -1.41071200 | 0.72564000  | -0.73795200 |
| C  | -2.62926200 | 0.17368900  | -1.04057600 |
| O  | -3.60976600 | 0.82799700  | -1.41564000 |
| C  | -2.75260300 | -1.32361900 | -0.91030500 |
| C  | -4.02475200 | -1.84758600 | -0.63593400 |
| C  | -1.68181800 | -2.20672400 | -1.11379900 |
| C  | -4.21779500 | -3.22418000 | -0.52574600 |
| H  | -4.85386000 | -1.15578200 | -0.52492600 |
| C  | -1.88083000 | -3.58609700 | -1.02364200 |
| H  | -0.70028900 | -1.81679500 | -1.35792600 |
| C  | -3.14455000 | -4.09837700 | -0.71879400 |
| H  | -5.20660800 | -3.61626900 | -0.30172800 |
| H  | -1.04830300 | -4.26241100 | -1.20204200 |
| H  | -3.29521800 | -5.17247800 | -0.64540300 |

TS3\_3CO

|   |             |             |             |
|---|-------------|-------------|-------------|
| C | -2.89776500 | -2.63855300 | -2.21731600 |
| C | -2.80073200 | -1.41398900 | -1.55107100 |
| C | -1.58072100 | -0.97487800 | -0.99957000 |
| C | -0.43566000 | -1.81539700 | -1.16250000 |
| C | -0.53807100 | -3.04870300 | -1.80393600 |
| C | -1.77331100 | -3.45697300 | -2.32680800 |
| H | -3.84617100 | -2.95796000 | -2.63831100 |
| H | -3.68060700 | -0.77981300 | -1.47737700 |
| H | -1.31800300 | 0.26729200  | -1.37661500 |
| H | 0.31431000  | -3.71522200 | -1.87915200 |
| H | -1.84960400 | -4.42100700 | -2.82069400 |
| C | 0.78648100  | -1.32384900 | -0.46361200 |
| O | 0.60129900  | -0.67016300 | 0.62019300  |
| N | 2.03402800  | -1.50796700 | -0.89997600 |
| C | 2.40133200  | -2.06248100 | -2.21519200 |
| H | 3.22474000  | -1.46276200 | -2.60786900 |
| H | 2.74041100  | -3.09914700 | -2.12112400 |
| H | 1.56143500  | -2.00624000 | -2.90676100 |
| C | 3.14289200  | -1.03591900 | -0.08303000 |

|    |             |             |             |
|----|-------------|-------------|-------------|
| C  | 3.83546800  | -1.95072000 | 0.70991800  |
| C  | 3.52559500  | 0.30517800  | -0.14964000 |
| C  | 4.93387000  | -1.51197600 | 1.45187300  |
| H  | 3.52059500  | -2.98967700 | 0.74725900  |
| C  | 4.62354700  | 0.73240300  | 0.59774600  |
| H  | 2.96895900  | 1.00519400  | -0.76569200 |
| C  | 5.32780300  | -0.17371500 | 1.39492400  |
| H  | 5.47989400  | -2.21708200 | 2.07104600  |
| H  | 4.92844400  | 1.77353600  | 0.55505300  |
| H  | 6.18383700  | 0.16378600  | 1.97127600  |
| Ru | -1.35402000 | 0.02080700  | 1.00637200  |
| O  | -0.60972300 | 1.88682500  | 0.26620900  |
| C  | -0.50729800 | 2.12279100  | -0.96814400 |
| O  | -0.89596100 | 1.38419800  | -1.90933200 |
| C  | 0.24120400  | 3.41952100  | -1.36097300 |
| F  | 0.19836800  | 4.31773600  | -0.37878200 |
| F  | -0.27232700 | 3.94666500  | -2.47057600 |
| F  | 1.53051000  | 3.08792800  | -1.59234300 |
| C  | -0.82517500 | 0.72765500  | 2.78001500  |
| O  | -0.48041400 | 1.12462400  | 3.78816300  |
| C  | -1.92342800 | -1.67070700 | 1.71321900  |
| O  | -2.24744000 | -2.68885200 | 2.11546600  |
| C  | -3.12495600 | 0.76211000  | 1.13637700  |
| O  | -4.17588200 | 1.20806800  | 1.16305900  |

TS4\_3CO

|   |             |             |             |
|---|-------------|-------------|-------------|
| C | -3.04419400 | -2.60014300 | -2.01251900 |
| C | -1.94331100 | -3.38718000 | -2.36110000 |
| C | -0.64952000 | -2.98174400 | -2.02809800 |
| C | -0.44749400 | -1.79402300 | -1.32256200 |
| C | -1.54318500 | -0.97719800 | -0.92633100 |
| C | -2.83875100 | -1.42401500 | -1.30154500 |
| H | -4.04741100 | -2.90517500 | -2.29277000 |
| H | -2.08662600 | -4.31751600 | -2.90257500 |
| H | 0.19572800  | -3.59803900 | -2.31636000 |
| H | -1.30870300 | 0.26071900  | -1.38458800 |
| H | -3.70060400 | -0.81292200 | -1.04698900 |
| N | 0.91749600  | -1.38176100 | -1.11426700 |
| C | 1.39179600  | -1.05225700 | 0.11128900  |
| O | 0.62386200  | -0.83258100 | 1.09701600  |
| C | 1.75363200  | -1.30849900 | -2.33652300 |
| H | 2.61853500  | -0.67576300 | -2.14649100 |
| H | 2.09605600  | -2.29506400 | -2.65789400 |
| H | 1.14968400  | -0.86149400 | -3.12894500 |

|    |             |             |             |
|----|-------------|-------------|-------------|
| C  | 2.84801800  | -0.96779200 | 0.37179000  |
| C  | 3.32152000  | 0.09725200  | 1.15717400  |
| C  | 3.73750000  | -1.96578300 | -0.06268100 |
| C  | 4.67544200  | 0.18078100  | 1.47016500  |
| H  | 2.62892800  | 0.85877900  | 1.50021000  |
| C  | 5.08583400  | -1.88934700 | 0.27688200  |
| H  | 3.37355000  | -2.81516100 | -0.63260100 |
| C  | 5.55671900  | -0.81247300 | 1.03358300  |
| H  | 5.04280700  | 1.01514800  | 2.05943100  |
| H  | 5.76787900  | -2.67039000 | -0.04432800 |
| H  | 6.61054900  | -0.75107200 | 1.28830200  |
| Ru | -1.28808900 | 0.05821900  | 1.03216400  |
| O  | -0.27184000 | 1.75052000  | 0.18664700  |
| C  | -0.32428600 | 2.02319200  | -1.04374100 |
| O  | -0.91957000 | 1.35810600  | -1.93270000 |
| C  | 0.48807900  | 3.25790800  | -1.50359800 |
| F  | 0.51073200  | 4.18907000  | -0.54884200 |
| F  | -0.01980000 | 3.77613100  | -2.61909900 |
| F  | 1.74927000  | 2.84717400  | -1.74296800 |
| C  | -2.97575700 | 0.96580800  | 0.92733800  |
| O  | -3.97231600 | 1.51666700  | 0.83096500  |
| C  | -0.86118700 | 0.86150700  | 2.80894000  |
| O  | -0.58282900 | 1.30772200  | 3.81705000  |
| C  | -2.07641400 | -1.51173700 | 1.80236000  |
| O  | -2.52423100 | -2.46521800 | 2.24145600  |

TS3\_no\_cap

|   |             |             |             |
|---|-------------|-------------|-------------|
| C | -3.57736800 | -2.72495100 | -0.99569300 |
| C | -3.35073800 | -1.48899000 | -0.38520600 |
| C | -2.04904100 | -1.04995800 | -0.07997400 |
| C | -0.96464200 | -1.88413200 | -0.47817100 |
| C | -1.18865500 | -3.13256400 | -1.06450400 |
| C | -2.49917000 | -3.55412900 | -1.31242200 |
| H | -4.59102700 | -3.04557700 | -1.21867800 |
| H | -4.19792900 | -0.84730700 | -0.15589000 |
| H | -1.87327000 | 0.22854700  | -0.50430100 |
| H | -0.36423700 | -3.79511800 | -1.30600800 |
| H | -2.67346600 | -4.52691100 | -1.76234300 |
| C | 0.36470300  | -1.34508600 | -0.08520300 |
| O | 0.39610000  | -0.62399600 | 0.96411100  |
| N | 1.50021100  | -1.54555700 | -0.77063400 |
| C | 1.58538400  | -2.16579600 | -2.10342500 |
| H | 2.30838100  | -1.59566600 | -2.69029200 |
| H | 1.93228800  | -3.20258900 | -2.03769900 |

|    |             |             |             |
|----|-------------|-------------|-------------|
| H  | 0.61906800  | -2.13132100 | -2.60558400 |
| C  | 2.74496000  | -1.01037200 | -0.24632500 |
| C  | 3.65499600  | -1.88104400 | 0.35417000  |
| C  | 3.04068800  | 0.34548900  | -0.40391500 |
| C  | 4.87989200  | -1.38583800 | 0.80629500  |
| H  | 3.40822600  | -2.93326900 | 0.46498300  |
| C  | 4.26579400  | 0.83103000  | 0.05392100  |
| H  | 2.32202600  | 1.01242800  | -0.87030700 |
| C  | 5.18521900  | -0.03188400 | 0.65607700  |
| H  | 5.59336000  | -2.05908500 | 1.27192400  |
| H  | 4.50242500  | 1.88420200  | -0.06393000 |
| H  | 6.13940600  | 0.35088200  | 1.00563300  |
| Ru | -1.44822500 | 0.00265600  | 1.78506200  |
| O  | -0.86521200 | 1.85106800  | 0.89436400  |
| C  | -1.03427000 | 2.06623000  | -0.33037700 |
| O  | -1.58917300 | 1.29021800  | -1.15794900 |
| C  | -0.45365600 | 3.37887400  | -0.90200700 |
| F  | -0.26430200 | 4.28434500  | 0.05995900  |
| F  | -1.25935000 | 3.89040000  | -1.83389900 |
| F  | 0.73886000  | 3.09450300  | -1.46821900 |

TS4\_no\_cap

|   |             |             |             |
|---|-------------|-------------|-------------|
| C | -3.08557900 | -3.30176300 | -0.69211000 |
| C | -1.97486800 | -3.89238500 | -1.30086900 |
| C | -0.74737700 | -3.23273900 | -1.30166600 |
| C | -0.61574500 | -1.98884400 | -0.67385900 |
| C | -1.70335400 | -1.38092400 | 0.00542300  |
| C | -2.93806900 | -2.07665000 | -0.05230000 |
| H | -4.05377600 | -3.79245700 | -0.72441100 |
| H | -2.06480600 | -4.85742200 | -1.79073400 |
| H | 0.10595000  | -3.69097200 | -1.79119200 |
| H | -1.88800400 | -0.10815600 | -0.49106500 |
| H | -3.81500700 | -1.61522500 | 0.39220800  |
| N | 0.65323100  | -1.32305900 | -0.82690700 |
| C | 1.32427700  | -0.81223800 | 0.23240300  |
| O | 0.78353200  | -0.65384200 | 1.36266000  |
| C | 1.16727100  | -1.22233700 | -2.21056500 |
| H | 1.89914700  | -0.41860200 | -2.26943900 |
| H | 1.63533200  | -2.15176500 | -2.54551000 |
| H | 0.32570000  | -0.99103900 | -2.86687800 |
| C | 2.75832300  | -0.43628100 | 0.12160900  |
| C | 3.16591400  | 0.78472900  | 0.68344000  |
| C | 3.71252600  | -1.29957200 | -0.44076700 |
| C | 4.50917400  | 1.15147500  | 0.64875100  |

|    |             |             |             |
|----|-------------|-------------|-------------|
| H  | 2.42374100  | 1.44114100  | 1.12643200  |
| C  | 5.05809300  | -0.93786500 | -0.44878100 |
| H  | 3.41040600  | -2.26170800 | -0.84360100 |
| C  | 5.45555600  | 0.29039100  | 0.08649700  |
| H  | 4.81936800  | 2.10511100  | 1.06495000  |
| H  | 5.79587000  | -1.61419700 | -0.86953600 |
| H  | 6.50377900  | 0.57388200  | 0.06952700  |
| Ru | -1.21115000 | -0.19609700 | 1.80918500  |
| O  | -0.75524800 | 1.58184500  | 0.67557500  |
| C  | -1.30374500 | 1.80581800  | -0.43040200 |
| O  | -1.96259200 | 0.97492900  | -1.11987100 |
| C  | -1.21436300 | 3.25761800  | -0.95212700 |
| F  | -2.07420400 | 4.00925800  | -0.23490700 |
| F  | -1.53862200 | 3.34089500  | -2.24055800 |
| F  | 0.02243800  | 3.73840900  | -0.77692400 |
